# Supplementary material for: Systems Genomics Reveals microRNA Regulation of ICS Response in Childhood Asthma
Source: MDPI journal article supplement (doi:10.3390/cells12111505), 2023-05-29
Supplement: s1 [file s1]

# **Systems Genomics Reveals microRNA Regulation of ICS Response in Childhood Asthma**

**Rinku Sharma<sup>1</sup>, Anshul Tiwari<sup>1,2</sup>, Alvin T. Kho<sup>1,3</sup>, Juan C. Celedón<sup>4</sup>, Scott T. Weiss<sup>1</sup>, Kelan G. Tantisira<sup>5</sup>, Michael J. McGeachie<sup>1,\*</sup>**

1. Channing Division of Network Medicine, Brigham and Women's Hospital, Harvard Medical School, Boston, MA 02115, USA

2. Department of Molecular Physiology and Biophysics, Vanderbilt University, Nashville, TN 37235, USA

3. Computational Health Informatics Program, Boston Children's Hospital, Boston, MA 02115, USA

4. Division of Pediatric Pulmonary Medicine, UPMC Children's Hospital of Pittsburgh, University of Pittsburgh, Pittsburgh, PA 15260, USA

5. Division of Pediatric Respiratory Medicine, University of California San Diego, Rady Children's Hospital, San Diego, CA 92123, USA

\* Correspondence: [remmg@channing.harvard.edu](mailto:remmg@channing.harvard.edu); Tel: +617-525-2272; Fax: +617-731-1541

## **Supplemental Materials**

## Supplemental Figures.

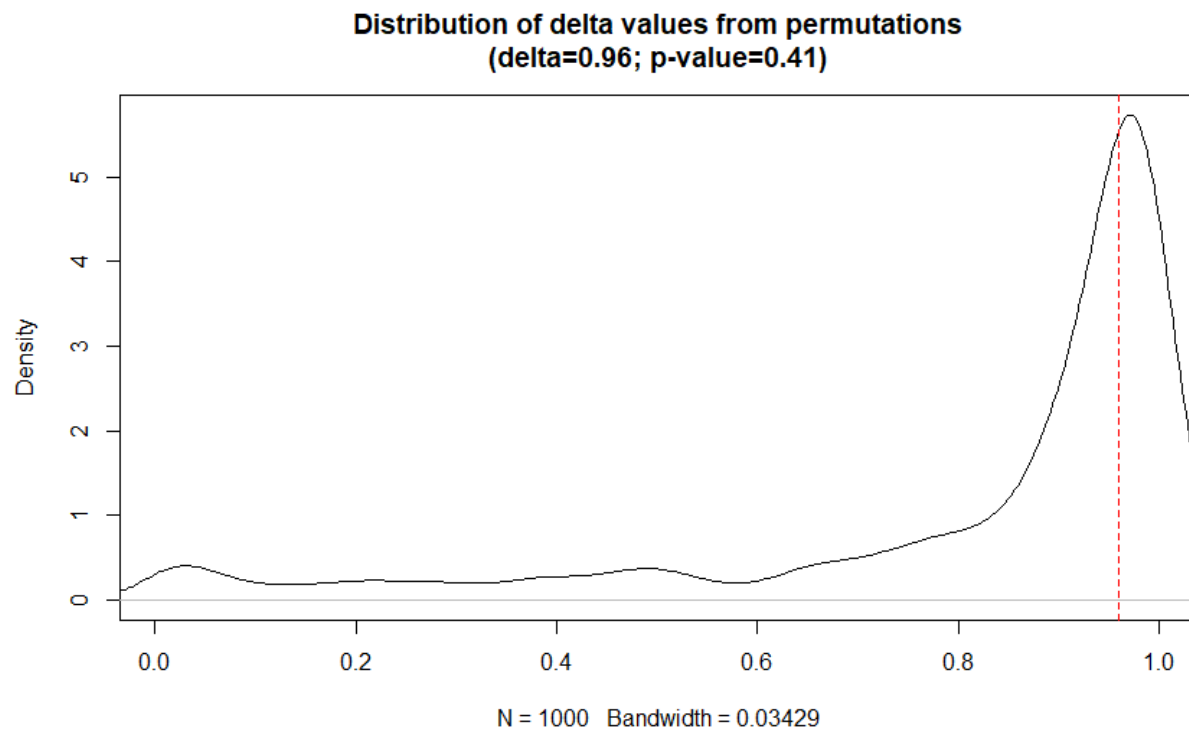

Figure S1. **GACRS batch effect check**

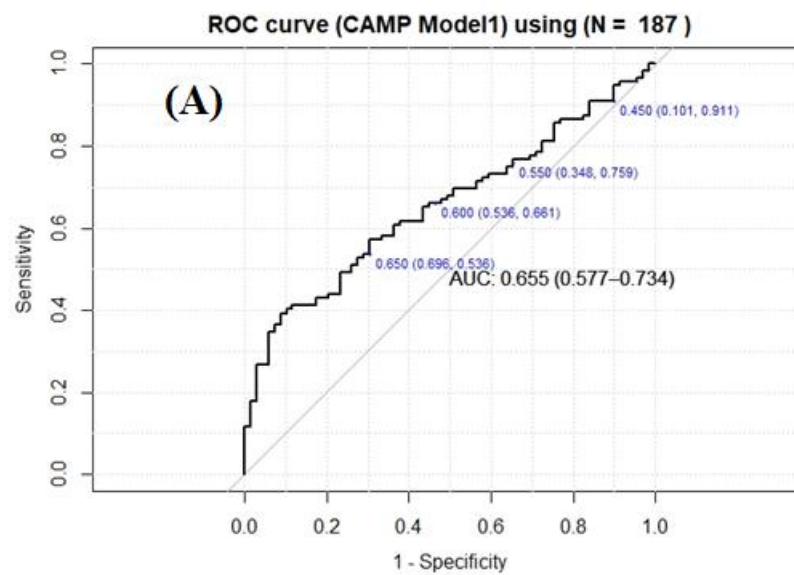

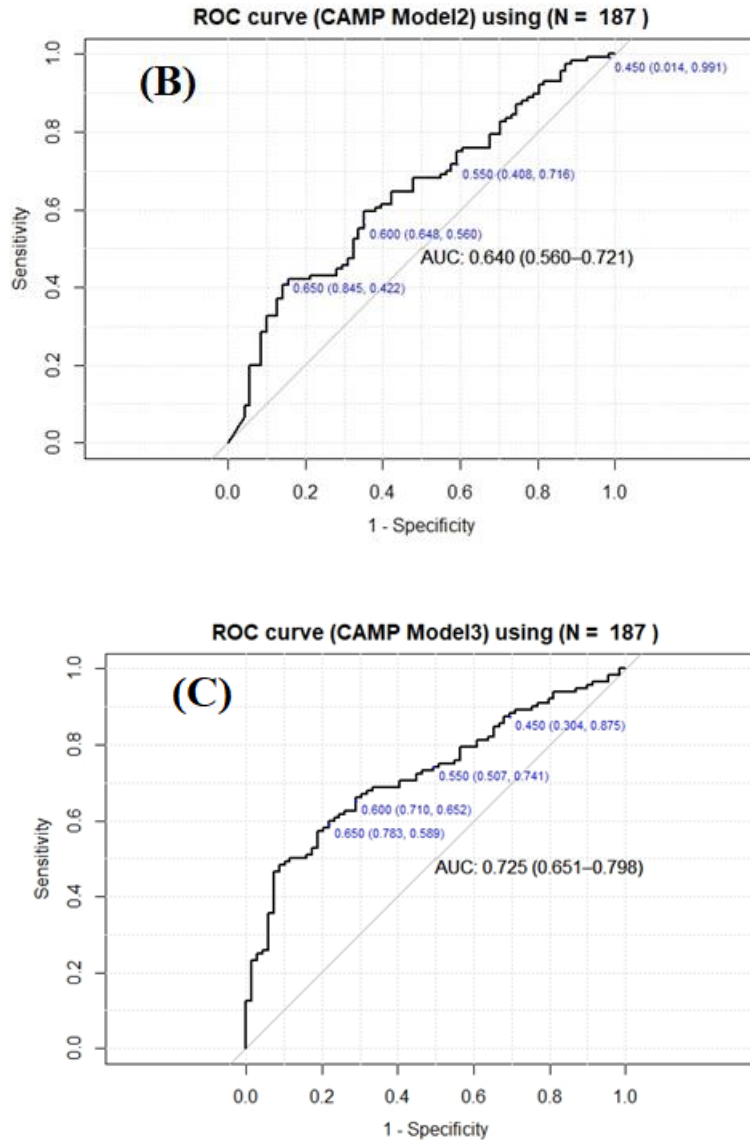

Figure S2. **ICS response prediction using logistic regression in replication cohort (CAMP)** (a) Model1 including age, sex, race/ethnicity, height, weight,BMI, log10 IgE, log10 Eosinophil, vitamin, smoking and asthma severity; (b) Model2: three miRNAs (miR-28-5p, miR-339-3p, miR-432-5p); (c ) Model3: Variables of Model1 and Model2



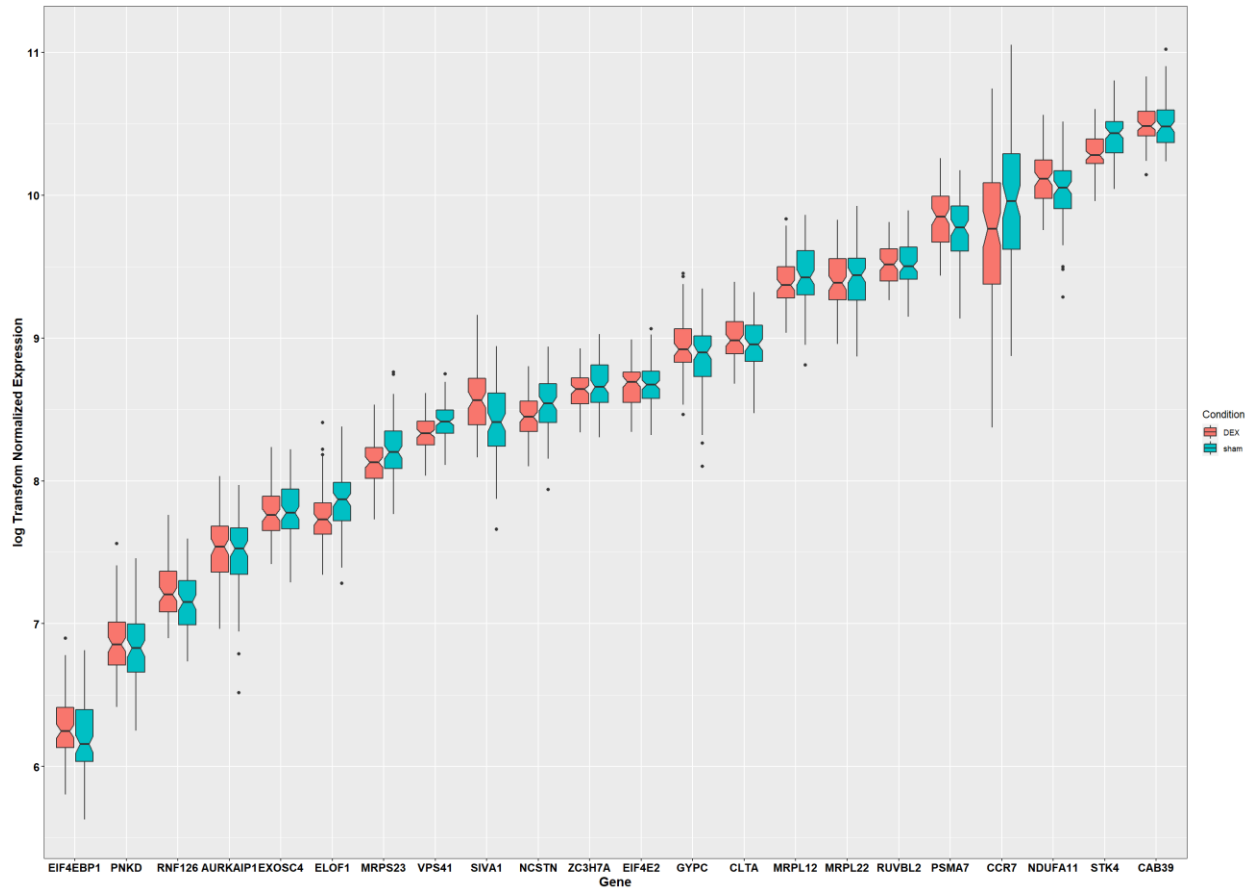

Figure S4. **Boxplot showing expression under DEX and Sham condition for 22 differentially expressed genes associated with replicated miRNAs.**

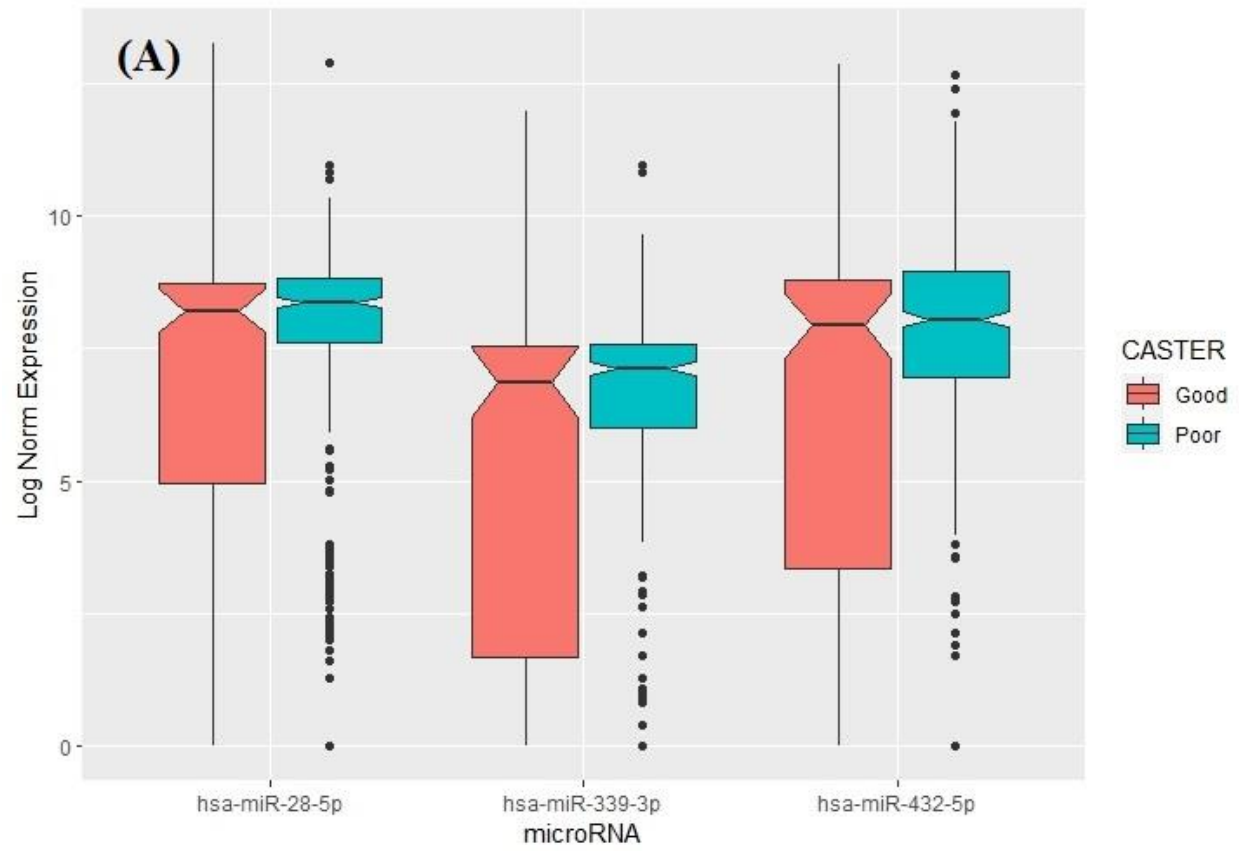

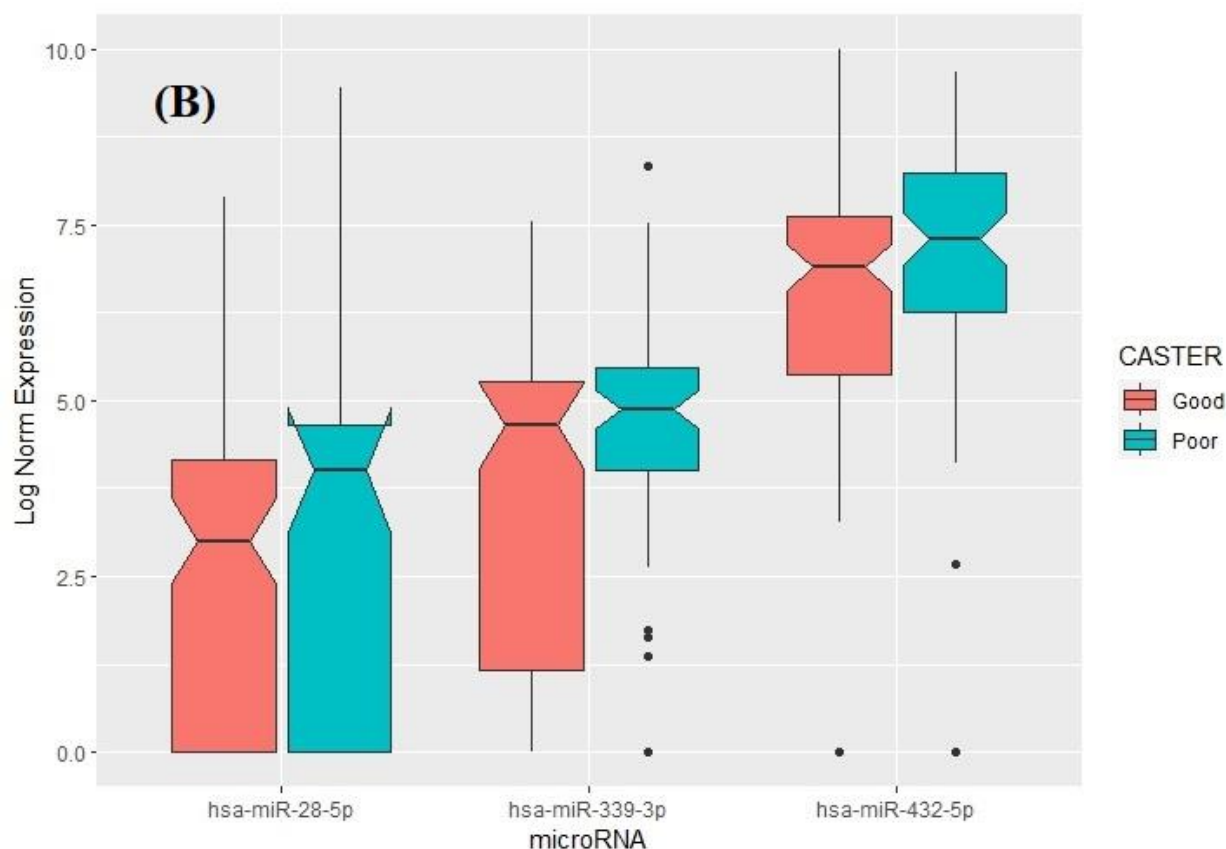

**Figure S5. BoxPlot showing expression in poor and good responder group for three replicated miRNAs in (A) GACRS and (B) CAMP.**

### Supplemental Tables.

Table S1. miRNAs associated with ICS response in GACRS cohort.

| Term            | Beta    | Z       | P.Value | OR     | ORlower | Orupper | FDR    |
|-----------------|---------|---------|---------|--------|---------|---------|--------|
| has-miR-28-5p   | 0.1275  | 3.5813  | 0.0003  | 1.136  | 1.0594  | 1.2181  | 0.0011 |
| has-miR-432-5p  | 0.0803  | 2.9883  | 0.0028  | 1.0836 | 1.028   | 1.1422  | 0.0082 |
| has-miR-339-3p  | 0.0643  | 2.238   | 0.0252  | 1.0664 | 1.008   | 1.1282  | 0.0703 |
| has-mir-151b    | 0.0908  | 2.1385  | 0.0325  | 1.095  | 1.0076  | 1.19    | 0.0887 |
| has-miR-486-5p  | -0.2412 | -3.5344 | 0.0004  | 0.7857 | 0.6873  | 0.8981  | 0.0012 |
| has-miR-874-3p  | 0.1031  | 3.5162  | 0.0004  | 1.1086 | 1.0467  | 1.1741  | 0.0013 |
| has-miR-152-3p  | 0.1701  | 3.3312  | 0.0009  | 1.1854 | 1.0725  | 1.3102  | 0.0026 |
| has-miR-23b-5p  | 0.0944  | 3.0297  | 0.0024  | 1.099  | 1.0339  | 1.1682  | 0.0072 |
| has-miR-193a-5p | 0.088   | 3.02    | 0.0025  | 1.092  | 1.0314  | 1.1562  | 0.0074 |
| has-miR-340-5p  | 0.081   | 2.7563  | 0.0058  | 1.0843 | 1.0237  | 1.1486  | 0.0171 |
| has-miR-340-3p  | 0.0775  | 2.6981  | 0.007   | 1.0805 | 1.0214  | 1.1431  | 0.0203 |

|                   |         |         |        |        |        |        |        |
|-------------------|---------|---------|--------|--------|--------|--------|--------|
| has-miR-221-5p    | 0.1197  | 2.6243  | 0.0087 | 1.1272 | 1.0308 | 1.2326 | 0.0253 |
| has-miR-744-5p    | 0.0941  | 2.6116  | 0.009  | 1.0987 | 1.0238 | 1.179  | 0.0261 |
| has-miR-15b-5p    | 0.0894  | 2.6092  | 0.0091 | 1.0935 | 1.0225 | 1.1695 | 0.0262 |
| has-miR-181a-2-3p | 0.0739  | 2.5998  | 0.0093 | 1.0767 | 1.0183 | 1.1383 | 0.0269 |
| has-let-7c-5p     | 0.1305  | 2.5869  | 0.0097 | 1.1394 | 1.0321 | 1.2579 | 0.0278 |
| has-miR-374b-5p   | 0.0705  | 2.4317  | 0.015  | 1.073  | 1.0138 | 1.1358 | 0.043  |
| has-miR-577       | 0.0682  | 2.4306  | 0.0151 | 1.0706 | 1.0133 | 1.1311 | 0.0431 |
| has-miR-195-5p    | 0.069   | 2.3885  | 0.0169 | 1.0714 | 1.0125 | 1.1338 | 0.0482 |
| has-miR-451a      | -0.166  | -2.3615 | 0.0182 | 0.847  | 0.738  | 0.9722 | 0.0517 |
| has-miR-200a-3p   | 0.0616  | 2.3107  | 0.0209 | 1.0635 | 1.0094 | 1.1205 | 0.059  |
| has-miR-199a-5p   | 0.1178  | 2.3015  | 0.0214 | 1.125  | 1.0176 | 1.2436 | 0.0603 |
| has-miR-199b-5p   | 0.0593  | 2.2692  | 0.0233 | 1.0611 | 1.0081 | 1.1168 | 0.0654 |
| has-miR-151a-5p   | 0.157   | 2.263   | 0.0236 | 1.17   | 1.0213 | 1.3405 | 0.0663 |
| has-miR-181a-3p   | 0.0657  | 2.2579  | 0.0239 | 1.0679 | 1.0087 | 1.1306 | 0.067  |
| has-miR-130b-5p   | 0.073   | 2.2307  | 0.0257 | 1.0758 | 1.0089 | 1.1471 | 0.0715 |
| has-miR-423-5p    | -0.1456 | -2.2276 | 0.0259 | 0.8645 | 0.7606 | 0.9827 | 0.0718 |
| has-miR-181b-5p   | 0.0682  | 2.2152  | 0.0267 | 1.0705 | 1.0079 | 1.1371 | 0.0739 |
| has-miR-142-3p    | 0.0616  | 2.1986  | 0.0279 | 1.0635 | 1.0067 | 1.1236 | 0.0769 |
| has-let-7b-3p     | 0.0612  | 2.1477  | 0.0317 | 1.0632 | 1.0054 | 1.1243 | 0.0872 |
| has-miR-339-5p    | 0.0597  | 2.1457  | 0.0319 | 1.0616 | 1.0052 | 1.1211 | 0.0874 |
| has-miR-223-3p    | 0.0698  | 2.1149  | 0.0344 | 1.0723 | 1.0051 | 1.1441 | 0.0938 |
| has-miR-11400     | 0.0606  | 2.1139  | 0.0345 | 1.0625 | 1.0044 | 1.1239 | 0.0938 |
| has-miR-125b-2-3p | 0.0589  | 2.1116  | 0.0347 | 1.0606 | 1.0042 | 1.1202 | 0.0941 |
| has-miR-494-3p    | 0.0529  | 2.1012  | 0.0356 | 1.0543 | 1.0036 | 1.1076 | 0.0962 |
| has-miR-181c-5p   | 0.0588  | 2.0915  | 0.0365 | 1.0606 | 1.0037 | 1.1207 | 0.0983 |

Table S2. Details of genes from LCL cell line used for differential expression analysis and WGCNA.

| SYMBOL | EntrezID | Definition                                                                            | logFC | AveExpr | P.Value  | adj.P.Val | Module  |
|--------|----------|---------------------------------------------------------------------------------------|-------|---------|----------|-----------|---------|
| IL2RG  | 3561     | interleukin 2 receptor, gamma (severe combined immunodeficiency) (IL2RG), mRNA.       | -0.02 | 9.58    | 3.03E-01 | 3.47E-01  | magenta |
| PTEN   | 5728     | phosphatase and tensin homolog (mutated in multiple advanced cancers 1) (PTEN), mRNA. | -0.10 | 7.26    | 3.37E-14 | 1.07E-13  | black   |



|         |      |                                                                                                                                                                                           |       |       |          |          |           |
|---------|------|-------------------------------------------------------------------------------------------------------------------------------------------------------------------------------------------|-------|-------|----------|----------|-----------|
| CDK4    | 1019 | cyclin-dependent kinase 4 (CDK4), mRNA.                                                                                                                                                   | 0.15  | 8.54  | 1.30E-19 | 5.44E-19 | magenta   |
| JAK1    | 3716 | Janus kinase 1 (a protein tyrosine kinase) (JAK1), mRNA.                                                                                                                                  | 0.02  | 7.05  | 2.80E-01 | 3.23E-01 | blue      |
| MCL1    | 4170 | myeloid cell leukemia sequence 1 (BCL2-related) (MCL1), transcript variant 1, mRNA.                                                                                                       | 0.11  | 7.17  | 2.52E-11 | 6.82E-11 | blue      |
| POMC    | 5443 | proopiomelanocortin (adrenocorticotropin/ beta-lipotropin/ alpha-melanocyte stimulating hormone/ beta-melanocyte stimulating hormone/ beta-endorphin) (POMC), transcript variant 2, mRNA. | 0.21  | 10.60 | 1.88E-31 | 1.30E-30 | grey      |
| CDKN1A  | 1026 | cyclin-dependent kinase inhibitor 1A (p21, Cip1) (CDKN1A), transcript variant 2, mRNA.                                                                                                    | -0.02 | 8.55  | 1.73E-01 | 2.07E-01 | red       |
| FSCN1   | 6624 | fascin homolog 1, actin-bundling protein (Strongylocentrotus purpuratus) (FSCN1), mRNA.                                                                                                   | 0.01  | 9.26  | 7.27E-01 | 7.60E-01 | tan       |
| HSP90B1 | 7184 | heat shock protein 90kDa beta (Grp94), member 1 (HSP90B1), mRNA.                                                                                                                          | 0.12  | 8.46  | 4.12E-21 | 1.85E-20 | tan       |
| CCND1   | 595  | cyclin D1 (CCND1), mRNA.                                                                                                                                                                  | -0.17 | 6.01  | 6.26E-20 | 2.67E-19 | turquoise |
| FOXO1   | 2308 | forkhead box O1A (rhabdomyosarcoma) (FOXO1A), mRNA.                                                                                                                                       | 0.06  | 7.51  | 3.56E-05 | 6.45E-05 | turquoise |

|         |       |                                                                                                    |       |       |          |          |           |
|---------|-------|----------------------------------------------------------------------------------------------------|-------|-------|----------|----------|-----------|
| HSPA8   | 3312  | heat shock 70kDa protein 8 (HSPA8), transcript variant 2, mRNA.                                    | 0.11  | 8.02  | 1.65E-09 | 4.02E-09 | turquoise |
| ACLY    | 47    | ATP citrate lyase (ACLY), transcript variant 1, mRNA.                                              | 0.05  | 11.01 | 4.74E-04 | 7.78E-04 | black     |
| ACP5    | 54    | acid phosphatase 5, tartrate resistant (ACP5), mRNA.                                               | 0.04  | 8.94  | 5.69E-03 | 8.32E-03 | black     |
| ANAPC11 | 51529 | APC11 anaphase promoting complex subunit 11 homolog (yeast) (ANAPC11), transcript variant 1, mRNA. | 0.08  | 12.48 | 3.47E-08 | 7.78E-08 | black     |
| ANKRD39 | 51239 | ankyrin repeat domain 39 (ANKRD39), mRNA.                                                          | -0.15 | 10.79 | 3.77E-11 | 1.01E-10 | black     |
| APRT    | 353   | adenine phosphoribosyltransferase (APRT), transcript variant 1, mRNA.                              | 0.10  | 6.63  | 3.72E-08 | 8.33E-08 | black     |
| ARF5    | 381   | ADP-ribosylation factor 5 (ARF5), mRNA.                                                            | 0.06  | 7.06  | 9.48E-04 | 1.50E-03 | black     |
| ATIC    | 471   | 5-aminoimidazole-4-carboxamide ribonucleotide formyltransferase/IMP cyclohydrolase (ATIC), mRNA.   | -0.20 | 7.53  | 1.71E-30 | 1.13E-29 | black     |
| ATOX1   | 475   | ATX1 antioxidant protein 1 homolog (yeast) (ATOX1), mRNA.                                          | 0.36  | 8.88  | 3.10E-34 | 2.40E-33 | black     |
| ATP2C1  | 27032 | ATPase, Ca <sup>++</sup> transporting, type 2C, member 1 (ATP2C1), transcript variant 1, mRNA.     | -0.12 | 11.57 | 7.15E-16 | 2.49E-15 | black     |

|          |       |                                                                                                                                                                    |       |      |          |          |       |
|----------|-------|--------------------------------------------------------------------------------------------------------------------------------------------------------------------|-------|------|----------|----------|-------|
| ATP5G1   | 516   | ATP synthase, H+ transporting, mitochondrial F0 complex, subunit C1 (subunit 9) (ATP5G1), nuclear gene encoding mitochondrial protein, transcript variant 2, mRNA. | -0.17 | 7.29 | 6.28E-28 | 3.82E-27 | black |
| ATP5I    | 521   | ATP synthase, H+ transporting, mitochondrial F0 complex, subunit E (ATP5I), nuclear gene encoding mitochondrial protein, mRNA.                                     | -0.13 | 8.94 | 3.11E-07 | 6.56E-07 | black |
| ATP5J2   | 9551  | ATP synthase, H+ transporting, mitochondrial F0 complex, subunit F2 (ATP5J2), nuclear gene encoding mitochondrial protein, transcript variant 3, mRNA.             | 0.04  | 7.74 | 5.92E-04 | 9.61E-04 | black |
| ATP5L    | 10632 | ATP synthase, H+ transporting, mitochondrial F0 complex, subunit G (ATP5L), nuclear gene encoding mitochondrial protein, mRNA.                                     | 0.00  | 7.25 | 8.79E-01 | 8.97E-01 | black |
| ATP6V1B2 | 526   | ATPase, H+ transporting, lysosomal 56/58kDa, V1 subunit B2 (ATP6V1B2), mRNA.                                                                                       | 0.02  | 7.73 | 1.78E-01 | 2.13E-01 | black |
| ATP6V1F  | 9296  | ATPase, H+ transporting, lysosomal 14kDa, V1 subunit F (ATP6V1F), mRNA.                                                                                            | 0.30  | 8.90 | 1.78E-26 | 1.02E-25 | black |

|          |        |                                                                                                            |       |       |          |          |       |
|----------|--------|------------------------------------------------------------------------------------------------------------|-------|-------|----------|----------|-------|
| B4GALT6  | 9331   | UDP-Gal:betaGlcNAc beta 1,4- galactosyltransferase, polypeptide 6 (B4GALT6), mRNA.                         | -0.09 | 6.85  | 3.95E-06 | 7.74E-06 | black |
| BCL2     | 596    | B-cell CLL/lymphoma 2 (BCL2), nuclear gene encoding mitochondrial protein, transcript variant alpha, mRNA. | 0.01  | 9.32  | 4.76E-01 | 5.21E-01 | black |
| BCS1L    | 617    | BCS1-like (yeast) (BCS1L), nuclear gene encoding mitochondrial protein, transcript variant 2, mRNA.        | -0.08 | 6.46  | 3.07E-05 | 5.59E-05 | black |
| BFSP2    | 8419   | beaded filament structural protein 2, phakinin (BFSP2), mRNA.                                              | -0.16 | 6.47  | 6.55E-19 | 2.66E-18 | black |
| BLOC1S1  | 2647   | biogenesis of lysosome-related organelles complex-1, subunit 1 (BLOC1S1), mRNA.                            | -0.03 | 8.11  | 1.48E-02 | 2.07E-02 | black |
| C16orf13 | 84326  | hypothetical protein MGC13114 (MGC13114), transcript variant 7, mRNA.                                      | -0.03 | 9.09  | 4.75E-02 | 6.22E-02 | black |
| C19orf48 | 84798  | chromosome 19 open reading frame 48 (C19orf48), mRNA.                                                      | 0.04  | 11.03 | 3.45E-03 | 5.15E-03 | black |
| C19orf53 | 28974  | chromosome 19 open reading frame 53 (C19orf53), mRNA.                                                      | -0.21 | 7.71  | 1.31E-33 | 9.79E-33 | black |
| C19orf70 | 125988 | hypothetical protein P117 (P117), mRNA.                                                                    | -0.03 | 8.04  | 1.12E-02 | 1.59E-02 | black |

|         |        |                                                                                                           |       |       |          |          |       |
|---------|--------|-----------------------------------------------------------------------------------------------------------|-------|-------|----------|----------|-------|
| C5orf22 | 55322  | chromosome 5 open reading frame 22 (C5orf22), mRNA.                                                       | -0.01 | 7.75  | 3.62E-01 | 4.08E-01 | black |
| C7orf55 | 154791 | hypothetical protein HSPC268 (HSPC268), mRNA.                                                             | 0.04  | 6.96  | 9.05E-02 | 1.14E-01 | black |
| CAB39   | 51719  | calcium binding protein 39 (CAB39), mRNA.                                                                 | 0.06  | 7.51  | 1.14E-02 | 1.61E-02 | black |
| CAND1   | 55832  | cullin-associated and neddylation-dissociated 1 (CAND1), mRNA.                                            | -0.07 | 7.74  | 1.35E-04 | 2.32E-04 | black |
| CCDC167 | 154467 | chromosome 6 open reading frame 129 (C6orf129), mRNA.                                                     | 0.69  | 10.38 | 4.41E-88 | 7.00E-86 | black |
| CD2AP   | 23607  | CD2-associated protein (CD2AP), mRNA.                                                                     | -0.07 | 7.73  | 1.57E-06 | 3.15E-06 | black |
| CD46    | 4179   | CD46 molecule, complement regulatory protein (CD46), transcript variant d, mRNA.                          | 0.00  | 12.33 | 9.89E-01 | 9.91E-01 | black |
| CDKN2A  | 1029   | cyclin-dependent kinase inhibitor 2A (melanoma, p16, inhibits CDK4) (CDKN2A), transcript variant 1, mRNA. | 0.11  | 7.92  | 4.24E-09 | 1.01E-08 | black |
| CGGBP1  | 8545   | CGG triplet repeat binding protein 1 (CGGBP1), transcript variant 1, mRNA.                                | -0.05 | 5.77  | 1.03E-03 | 1.63E-03 | black |
| CHCHD1  | 118487 | coiled-coil-helix-coiled-coil-helix domain containing 1 (CHCHD1), mRNA.                                   | 0.20  | 8.36  | 3.97E-32 | 2.83E-31 | black |
| CHCHD5  | 84269  | coiled-coil-helix-coiled-coil-helix domain containing 5 (CHCHD5), mRNA.                                   | 0.01  | 9.08  | 3.76E-01 | 4.21E-01 | black |

|         |        |                                                                                                                                              |       |      |          |          |       |
|---------|--------|----------------------------------------------------------------------------------------------------------------------------------------------|-------|------|----------|----------|-------|
| CHMP4A  | 29082  | chromatin modifying protein 4A (CHMP4A), mRNA.                                                                                               | -0.13 | 7.16 | 1.37E-13 | 4.20E-13 | black |
| CIB1    | 10519  | calcium and integrin binding 1 (calmyrin) (CIB1), mRNA.                                                                                      | 0.41  | 7.58 | 9.01E-59 | 2.32E-57 | black |
| CLPP    | 8192   | ClpP caseinolytic peptidase, ATP-dependent, proteolytic subunit homolog (E. coli) (CLPP), nuclear gene encoding mitochondrial protein, mRNA. | 0.10  | 5.45 | 2.18E-07 | 4.66E-07 | black |
| CLTB    | 1212   | clathrin, light chain (Lcb) (CLTB), transcript variant 1, mRNA.                                                                              | -0.35 | 8.54 | 1.12E-29 | 7.21E-29 | black |
| CNTNAP1 | 8506   | contactin associated protein 1 (CNTNAP1), mRNA.                                                                                              | -0.13 | 8.09 | 1.32E-17 | 5.03E-17 | black |
| COA4    | 51287  | coiled-coil-helix-coiled-coil-helix domain containing 8 (CHCHD8), mRNA.                                                                      | 0.08  | 6.65 | 4.09E-06 | 8.00E-06 | black |
| COMMD1  | 150684 | copper metabolism (Murr1) domain containing 1 (COMMD1), mRNA.                                                                                | -0.05 | 6.41 | 5.36E-03 | 7.86E-03 | black |
| COMTD1  | 118881 | catechol-O-methyltransferase domain containing 1 (COMTD1), mRNA.                                                                             | -0.06 | 5.87 | 1.54E-05 | 2.89E-05 | black |
| COX14   | 84987  | chromosome 12 open reading frame 62 (C12orf62), mRNA.                                                                                        | -0.01 | 8.84 | 6.00E-01 | 6.41E-01 | black |

|        |       |                                                                                                                                  |       |       |          |          |       |
|--------|-------|----------------------------------------------------------------------------------------------------------------------------------|-------|-------|----------|----------|-------|
| COX17  | 10063 | COX17 cytochrome c oxidase assembly homolog ( <i>S. cerevisiae</i> ) (COX17), nuclear gene encoding mitochondrial protein, mRNA. | -0.03 | 7.93  | 2.63E-02 | 3.55E-02 | black |
| COX5B  | 1329  | cytochrome c oxidase subunit Vb (COX5B), mRNA.                                                                                   | -0.06 | 6.63  | 1.87E-05 | 3.48E-05 | black |
| COX6A1 | 1337  | cytochrome c oxidase subunit VIa polypeptide 1 (COX6A1), nuclear gene encoding mitochondrial protein, mRNA.                      | 0.02  | 8.01  | 1.29E-01 | 1.58E-01 | black |
| COX8A  | 1351  | cytochrome c oxidase subunit 8A (ubiquitous) (COX8A), mRNA.                                                                      | 0.00  | 12.33 | 7.64E-01 | 7.94E-01 | black |
| CRYZ   | 1429  | crystallin, zeta (quinone reductase) (CRYZ), mRNA.                                                                               | -0.25 | 5.97  | 5.13E-32 | 3.64E-31 | black |
| CYBA   | 1535  | cytochrome b-245, alpha polypeptide (CYBA), mRNA.                                                                                | -0.06 | 8.02  | 1.34E-04 | 2.31E-04 | black |
| CYC1   | 1537  | cytochrome c-1 (CYC1), mRNA.                                                                                                     | 0.00  | 7.34  | 9.62E-01 | 9.68E-01 | black |
| DCTN3  | 11258 | dynactin 3 (p22) (DCTN3), transcript variant 1, mRNA.                                                                            | -0.05 | 5.97  | 6.71E-03 | 9.75E-03 | black |
| DCXR   | 51181 | dicarbonyl/L-xylulose reductase (DCXR), mRNA.                                                                                    | 0.17  | 7.39  | 6.43E-24 | 3.30E-23 | black |
| DDRGK1 | 65992 | chromosome 20 open reading frame 116 (C20orf116), mRNA.                                                                          | -0.02 | 7.33  | 3.78E-01 | 4.23E-01 | black |
| DNPH1  | 10591 | chromosome 6 open reading frame 108 (C6orf108), transcript variant 1, mRNA.                                                      | -0.04 | 10.78 | 2.07E-02 | 2.83E-02 | black |

|                  |        |                                                                                                   |       |       |              |              |       |
|------------------|--------|---------------------------------------------------------------------------------------------------|-------|-------|--------------|--------------|-------|
| DPM3             | 54344  | dolichyl-phosphate<br>mannosyltransferase<br>polypeptide 3 (DPM3),<br>transcript variant 1, mRNA. | 0.23  | 8.17  | 3.32E-<br>31 | 2.25E-<br>30 | black |
| DYNLL2           | 140735 | dynein, light chain, LC8-type 2<br>(DYNLL2), mRNA.                                                | -0.03 | 10.18 | 3.40E-<br>02 | 4.52E-<br>02 | black |
| DYRK4            | 8798   | dual-specificity tyrosine-(Y)-<br>phosphorylation regulated<br>kinase 4 (DYRK4), mRNA.            | -0.03 | 9.90  | 7.18E-<br>02 | 9.18E-<br>02 | black |
| EBP              | 10682  | emopamil binding protein<br>(sterol isomerase) (EBP),<br>mRNA.                                    | -0.45 | 8.90  | 4.21E-<br>56 | 8.93E-<br>55 | black |
| EBPL             | 84650  | emopamil binding protein-like<br>(EBPL), mRNA.                                                    | -0.01 | 11.85 | 6.26E-<br>01 | 6.66E-<br>01 | black |
| EDF1             | 8721   | endothelial differentiation-<br>related factor 1 (EDF1),<br>transcript variant alpha,<br>mRNA.    | 0.14  | 9.50  | 6.79E-<br>16 | 2.36E-<br>15 | black |
| EIF4E2           | 9470   | eukaryotic translation initiation<br>factor 4E family member 2<br>(EIF4E2), mRNA.                 | -0.06 | 8.91  | 2.88E-<br>05 | 5.27E-<br>05 | black |
| EIF5A            | 1984   | eukaryotic translation initiation<br>factor 5A (EIF5A), mRNA.                                     | 0.02  | 7.73  | 3.04E-<br>01 | 3.48E-<br>01 | black |
| ELF1             | 1997   | E74-like factor 1 (ets domain<br>transcription factor) (ELF1),<br>mRNA.                           | 0.32  | 6.78  | 4.86E-<br>43 | 5.66E-<br>42 | black |
| EPB41L4A-<br>AS1 | 114915 | TIGA1 (TIGA1), mRNA.                                                                              | -0.43 | 8.31  | 5.98E-<br>70 | 2.71E-<br>68 | black |
| EPN1             | 29924  | epsin 1 (EPN1), mRNA.                                                                             | 0.02  | 9.00  | 3.53E-<br>02 | 4.69E-<br>02 | black |
| EXOSC5           | 56915  | exosome component 5<br>(EXOSC5), mRNA.                                                            | -0.33 | 7.88  | 2.81E-<br>52 | 4.81E-<br>51 | black |



|         |        |                                                                                                                               |       |       |          |          |       |
|---------|--------|-------------------------------------------------------------------------------------------------------------------------------|-------|-------|----------|----------|-------|
| FAM173A | 65990  | chromosome 16 open reading frame 24 (C16orf24), mRNA.                                                                         | -0.04 | 7.63  | 4.16E-02 | 5.48E-02 | black |
| FAM96B  | 51647  | family with sequence similarity 96, member B (FAM96B), mRNA.                                                                  | -0.02 | 6.42  | 9.13E-02 | 1.15E-01 | black |
| FAU     | 2197   | Finkel-Biskis-Reilly murine sarcoma virus (FBR-MuSV) ubiquitously expressed (fox derived); ribosomal protein S30 (FAU), mRNA. | -0.24 | 7.60  | 4.73E-42 | 5.27E-41 | black |
| FDPS    | 2224   | farnesyl diphosphate synthase (farnesyl pyrophosphate synthetase, dimethylallyltransferase, geranyltransferase) (FDPS), mRNA. | -0.01 | 12.32 | 5.82E-01 | 6.25E-01 | black |
| FDX1L   | 112812 | similar to RIKEN cDNA B230118G17 gene (MGC19604), transcript variant 1, mRNA.                                                 | 0.07  | 5.90  | 1.35E-04 | 2.31E-04 | black |
| FIS1    | 51024  | fission 1 (mitochondrial outer membrane) homolog (S. cerevisiae) (FIS1), mRNA.                                                | 0.41  | 7.74  | 2.84E-55 | 5.78E-54 | black |
| FRG1B   | 284802 | similar to FRG1 protein (FSHD region gene 1 protein) (MGC72104), mRNA.                                                        | -0.14 | 7.67  | 5.62E-20 | 2.40E-19 | black |
| FUOM    | 282969 | chromosome 10 open reading frame 125 (C10orf125), mRNA.                                                                       | -0.09 | 11.90 | 8.65E-13 | 2.54E-12 | black |

|        |       |                                                                                                         |       |       |          |          |       |
|--------|-------|---------------------------------------------------------------------------------------------------------|-------|-------|----------|----------|-------|
| G3BP2  | 9908  | GTPase activating protein (SH3 domain) binding protein 2 (G3BP2), transcript variant 1, mRNA.           | -0.09 | 7.30  | 1.53E-08 | 3.53E-08 | black |
| GABPB1 | 2553  | GA binding protein transcription factor, beta subunit 2 (GABPB2), transcript variant gamma-2, mRNA.     | 0.05  | 6.43  | 5.27E-03 | 7.73E-03 | black |
| GCA    | 25801 | grancalcin, EF-hand calcium binding protein (GCA), mRNA.                                                | -0.02 | 7.32  | 4.58E-01 | 5.04E-01 | black |
| GCLM   | 2730  | glutamate-cysteine ligase, modifier subunit (GCLM), mRNA.                                               | 0.02  | 10.16 | 1.91E-01 | 2.28E-01 | black |
| GMFG   | 9535  | glia maturation factor, gamma (GMFG), mRNA.                                                             | -0.10 | 6.79  | 6.59E-11 | 1.75E-10 | black |
| GMPS   | 8833  | guanine monphosphate synthetase (GMPS), mRNA.                                                           | -0.03 | 5.85  | 2.87E-02 | 3.84E-02 | black |
| GNGT2  | 2793  | guanine nucleotide binding protein (G protein), gamma transducing activity polypeptide 2 (GNGT2), mRNA. | 0.41  | 5.99  | 8.27E-34 | 6.25E-33 | black |
| GNPTG  | 84572 | N-acetylglucosamine-1-phosphate transferase, gamma subunit (GNPTG), mRNA.                               | 0.03  | 8.65  | 9.05E-03 | 1.29E-02 | black |
| GOLGB1 | 2804  | golgi autoantigen, golgin subfamily b, macrogolgin (with transmembrane signal), 1 (GOLGB1), mRNA.       | -0.06 | 7.47  | 3.61E-04 | 5.98E-04 | black |

|         |        |                                                                                    |       |       |           |           |       |
|---------|--------|------------------------------------------------------------------------------------|-------|-------|-----------|-----------|-------|
| GPX1    | 2876   | glutathione peroxidase 1 (GPX1), transcript variant 1, mRNA.                       | -0.04 | 10.01 | 5.38E-04  | 8.77E-04  | black |
| GSTK1   | 373156 | glutathione S-transferase kappa 1 (GSTK1), mRNA.                                   | 0.08  | 7.18  | 1.71E-07  | 3.68E-07  | black |
| GSTO1   | 9446   | glutathione S-transferase omega 1 (GSTO1), mRNA.                                   | 0.00  | 9.01  | 7.09E-01  | 7.44E-01  | black |
| GSTP1   | 2950   | glutathione S-transferase pi (GSTP1), mRNA.                                        | -0.16 | 8.73  | 4.87E-25  | 2.64E-24  | black |
| GUK1    | 2987   | guanylate kinase 1 (GUK1), mRNA.                                                   | -0.05 | 8.32  | 2.64E-03  | 3.98E-03  | black |
| GYPC    | 2995   | glycophorin C (Gerbich blood group) (GYPC), transcript variant 1, mRNA.            | -0.20 | 7.59  | 3.07E-23  | 1.53E-22  | black |
| HAUS4   | 54930  | chromosome 14 open reading frame 94 (C14orf94), mRNA.                              | 0.03  | 7.27  | 2.66E-02  | 3.59E-02  | black |
| HAX1    | 10456  | HCLS1 associated protein X-1 (HAX1), transcript variant 2, mRNA.                   | -0.04 | 8.76  | 6.38E-04  | 1.03E-03  | black |
| HDDC3   | 374659 | HD domain containing 3 (HDDC3), mRNA.                                              | 0.03  | 10.77 | 1.07E-01  | 1.33E-01  | black |
| HIGD2A  | 192286 | HIG1 domain family, member 2A (HIGD2A), mRNA.                                      | 0.03  | 8.39  | 4.51E-02  | 5.91E-02  | black |
| HINT2   | 84681  | histidine triad nucleotide binding protein 2 (HINT2), mRNA.                        | -0.13 | 8.21  | 1.84E-15  | 6.24E-15  | black |
| HNRNPAB | 3182   | heterogeneous nuclear ribonucleoprotein A/B (HNRNPAB), transcript variant 1, mRNA. | 1.17  | 6.66  | 2.40E-112 | 2.03E-109 | black |

|         |        |                                                                                                                               |       |       |          |          |       |
|---------|--------|-------------------------------------------------------------------------------------------------------------------------------|-------|-------|----------|----------|-------|
| HNRNPD  | 3184   | heterogeneous nuclear ribonucleoprotein D (AU-rich element RNA binding protein 1, 37kDa) (HNRPD), transcript variant 4, mRNA. | 0.06  | 8.02  | 7.94E-04 | 1.27E-03 | black |
| HRAS    | 3265   | v-Ha-ras Harvey rat sarcoma viral oncogene homolog (HRAS), transcript variant 1, mRNA.                                        | -0.03 | 9.45  | 4.06E-02 | 5.35E-02 | black |
| HSD17B8 | 7923   | hydroxysteroid (17-beta) dehydrogenase 8 (HSD17B8), mRNA.                                                                     | -0.06 | 10.34 | 8.88E-10 | 2.20E-09 | black |
| HSPA1A  | 3303   | heat shock 70kDa protein 1A (HSPA1A), mRNA.                                                                                   | -0.02 | 6.44  | 2.05E-01 | 2.43E-01 | black |
| HSPA1B  | 3304   | heat shock 70kDa protein 1B (HSPA1B), mRNA.                                                                                   | -0.22 | 11.00 | 5.39E-50 | 8.45E-49 | black |
| IARS    | 3376   | isoleucyl-tRNA synthetase (IARS), transcript variant short, mRNA.                                                             | 0.06  | 8.08  | 6.36E-06 | 1.23E-05 | black |
| IFI27L1 | 122509 | family with sequence similarity 14, member B (FAM14B), mRNA.                                                                  | 0.09  | 7.24  | 2.18E-11 | 5.92E-11 | black |
| IFI27L2 | 83982  | family with sequence similarity 14, member A (FAM14A), mRNA.                                                                  | -0.05 | 10.77 | 5.17E-05 | 9.22E-05 | black |
| IMP4    | 92856  | IMP4, U3 small nucleolar ribonucleoprotein, homolog (yeast) (IMP4), mRNA.                                                     | 0.43  | 6.43  | 1.29E-47 | 1.88E-46 | black |
| KAT8    | 84148  | MYST histone acetyltransferase 1 (MYST1), mRNA.                                                                               | -0.01 | 9.60  | 6.00E-01 | 6.41E-01 | black |

|           |        |                                                                                           |       |       |          |          |       |
|-----------|--------|-------------------------------------------------------------------------------------------|-------|-------|----------|----------|-------|
| KRT10     | 3858   | keratin 10 (epidermolytic hyperkeratosis; keratosis palmaris et plantaris) (KRT10), mRNA. | -0.08 | 8.88  | 1.58E-09 | 3.87E-09 | black |
| KRTCAP2   | 200185 | keratinocyte associated protein 2 (KRTCAP2), mRNA.                                        | -0.31 | 10.88 | 3.13E-54 | 5.98E-53 | black |
| LAGE3     | 8270   | L antigen family, member 3 (LAGE3), mRNA.                                                 | -0.13 | 6.82  | 8.04E-12 | 2.24E-11 | black |
| LAMTOR2   | 28956  | mitogen-activated protein-binding protein-interacting protein (MAPBPIP), mRNA.            | 0.05  | 8.53  | 2.04E-03 | 3.13E-03 | black |
| LAMTOR4   | 389541 | similar to CG14977-PA (LOC389541), mRNA.                                                  | -0.03 | 5.79  | 9.05E-02 | 1.14E-01 | black |
| LANCL1    | 10314  | LanC lantibiotic synthetase component C-like 1 (bacterial) (LANCL1), mRNA.                | 0.12  | 8.64  | 4.02E-13 | 1.21E-12 | black |
| LAS1L     | 81887  | LAS1-like ( <i>S. cerevisiae</i> ) (LAS1L), mRNA.                                         | -0.03 | 5.76  | 4.73E-02 | 6.19E-02 | black |
| LBHD1     | 79081  | chromosome 11 open reading frame 48 (C11orf48), mRNA.                                     | -0.07 | 5.78  | 3.98E-05 | 7.18E-05 | black |
| LINC00116 | 205251 | PREDICTED: LOC205251 (LOC205251), misc RNA.                                               | 0.13  | 9.48  | 6.81E-17 | 2.51E-16 | black |
| LRPPRC    | 10128  | leucine-rich PPR-motif containing (LRPPRC), mRNA.                                         | -0.22 | 10.60 | 1.37E-45 | 1.81E-44 | black |
| LSM7      | 51690  | LSM7 homolog, U6 small nuclear RNA associated ( <i>S. cerevisiae</i> ) (LSM7), mRNA.      | 0.22  | 5.89  | 1.58E-26 | 9.09E-26 | black |

|        |       |                                                                                                  |       |      |          |          |       |
|--------|-------|--------------------------------------------------------------------------------------------------|-------|------|----------|----------|-------|
| MAD2L2 | 10459 | MAD2 mitotic arrest deficient-like 2 (yeast) (MAD2L2), mRNA.                                     | 0.51  | 5.93 | 1.35E-35 | 1.12E-34 | black |
| MAPRE1 | 22919 | microtubule-associated protein, RP/EB family, member 1 (MAPRE1), mRNA.                           | 0.02  | 8.81 | 6.84E-02 | 8.76E-02 | black |
| MGMT   | 4255  | O-6-methylguanine-DNA methyltransferase (MGMT), mRNA.                                            | 0.02  | 6.64 | 3.35E-01 | 3.80E-01 | black |
| MIDN   | 90007 | midnolin (MIDN), mRNA.                                                                           | 0.07  | 5.60 | 2.35E-04 | 3.96E-04 | black |
| MIF    | 4282  | macrophage migration inhibitory factor (glycosylation-inhibiting factor) (MIF), mRNA.            | 0.09  | 8.96 | 1.59E-09 | 3.89E-09 | black |
| MIIP   | 60672 | invasion inhibitory protein 45 (IIP45), transcript variant 1, mRNA.                              | 0.02  | 6.48 | 1.30E-01 | 1.60E-01 | black |
| MPC1   | 51660 | brain protein 44-like (BRP44L), mRNA.                                                            | -0.25 | 9.33 | 1.73E-38 | 1.65E-37 | black |
| MRPL14 | 64928 | mitochondrial ribosomal protein L14 (MRPL14), nuclear gene encoding mitochondrial protein, mRNA. | 0.08  | 8.44 | 4.06E-07 | 8.49E-07 | black |
| MRPL23 | 6150  | mitochondrial ribosomal protein L23 (MRPL23), nuclear gene encoding mitochondrial protein, mRNA. | -0.01 | 6.23 | 6.32E-01 | 6.71E-01 | black |

|        |        |                                                                                                                        |       |       |          |          |       |
|--------|--------|------------------------------------------------------------------------------------------------------------------------|-------|-------|----------|----------|-------|
| MRPL27 | 51264  | mitochondrial ribosomal protein L27 (MRPL27), nuclear gene encoding mitochondrial protein, transcript variant 1, mRNA. | 0.00  | 7.55  | 8.45E-01 | 8.68E-01 | black |
| MRPL34 | 64981  | mitochondrial ribosomal protein L34 (MRPL34), nuclear gene encoding mitochondrial protein, mRNA.                       | -0.02 | 9.86  | 1.30E-01 | 1.59E-01 | black |
| MRPL36 | 64979  | mitochondrial ribosomal protein L36 (MRPL36), nuclear gene encoding mitochondrial protein, mRNA.                       | -0.01 | 8.88  | 4.47E-01 | 4.94E-01 | black |
| MRPL41 | 64975  | mitochondrial ribosomal protein L41 (MRPL41), nuclear gene encoding mitochondrial protein, mRNA.                       | 0.13  | 7.47  | 1.55E-12 | 4.50E-12 | black |
| MRPL53 | 116540 | mitochondrial ribosomal protein L53 (MRPL53), nuclear gene encoding mitochondrial protein, mRNA.                       | 0.00  | 12.38 | 9.14E-01 | 9.28E-01 | black |
| MRPL54 | 116541 | mitochondrial ribosomal protein L54 (MRPL54), nuclear gene encoding mitochondrial protein, mRNA.                       | 0.46  | 7.15  | 5.28E-55 | 1.05E-53 | black |

|         |        |                                                                                                                        |       |      |          |          |       |
|---------|--------|------------------------------------------------------------------------------------------------------------------------|-------|------|----------|----------|-------|
| MRPL55  | 128308 | mitochondrial ribosomal protein L55 (MRPL55), nuclear gene encoding mitochondrial protein, transcript variant 8, mRNA. | 0.00  | 7.90 | 9.16E-01 | 9.29E-01 | black |
| MRPS11  | 64963  | mitochondrial ribosomal protein S11 (MRPS11), nuclear gene encoding mitochondrial protein, transcript variant 1, mRNA. | 0.08  | 8.22 | 4.42E-08 | 9.85E-08 | black |
| MRPS18A | 55168  | mitochondrial ribosomal protein S18A (MRPS18A), nuclear gene encoding mitochondrial protein, mRNA.                     | 0.09  | 8.24 | 1.56E-06 | 3.13E-06 | black |
| MRPS23  | 51649  | mitochondrial ribosomal protein S23 (MRPS23), nuclear gene encoding mitochondrial protein, mRNA.                       | -0.19 | 9.38 | 1.56E-20 | 6.85E-20 | black |
| MRPS34  | 65993  | mitochondrial ribosomal protein S34 (MRPS34), nuclear gene encoding mitochondrial protein, mRNA.                       | 0.03  | 7.33 | 9.26E-02 | 1.16E-01 | black |
| MSRB2   | 22921  | methionine sulfoxide reductase B2 (MSRB2), mRNA.                                                                       | 0.05  | 9.13 | 1.54E-04 | 2.63E-04 | black |
| MTMR4   | 9110   | myotubularin related protein 4 (MTMR4), mRNA.                                                                          | 0.03  | 5.87 | 2.68E-02 | 3.61E-02 | black |
| MYL12B  | 103910 | myosin regulatory light chain MRLC2 (MRLC2), mRNA.                                                                     | 0.58  | 7.21 | 3.39E-74 | 1.87E-72 | black |



|       |        |                                                                                                                                                                              |       |      |          |          |       |
|-------|--------|------------------------------------------------------------------------------------------------------------------------------------------------------------------------------|-------|------|----------|----------|-------|
| MYL6  | 4637   | myosin, light chain 6, alkali, smooth muscle and non-muscle (MYL6), transcript variant 2, mRNA.                                                                              | -0.01 | 7.28 | 7.41E-01 | 7.72E-01 | black |
| MYOM2 | 9172   | myomesin (M-protein) 2, 165kDa (MYOM2), mRNA.                                                                                                                                | 0.09  | 8.98 | 2.21E-09 | 5.34E-09 | black |
| NA    | 654483 | bolA homolog 2B (E. coli) (BOLA2B), mRNA.                                                                                                                                    | -0.35 | 6.58 | 3.36E-53 | 5.95E-52 | black |
| NA    | 10094  | actin related protein 2/3 complex, subunit 3, 21kDa (ARPC3), mRNA.                                                                                                           | -0.21 | 8.42 | 7.83E-24 | 4.01E-23 | black |
| NA    | 95     | aminoacylase 1 (ACY1), mRNA.                                                                                                                                                 | -0.13 | 8.07 | 2.85E-22 | 1.35E-21 | black |
| NA    | 79005  | sodium channel modifier 1 (SCNM1), transcript variant 2, mRNA.                                                                                                               | 0.07  | 9.79 | 2.58E-04 | 4.33E-04 | black |
| NA    | 151230 | kelch-like 23 (Drosophila) (KLHL23), mRNA.                                                                                                                                   | -0.04 | 7.51 | 7.92E-03 | 1.14E-02 | black |
| NA    | 51025  | mitochondria-associated protein involved in granulocyte-macrophage colony-stimulating factor signal transduction (Magma), nuclear gene encoding mitochondrial protein, mRNA. | 0.04  | 9.49 | 8.89E-03 | 1.27E-02 | black |
| NA    | 10169  | small EDRK-rich factor 2 (SERF2), mRNA.                                                                                                                                      | 0.02  | 7.74 | 2.07E-01 | 2.45E-01 | black |
| NA    | 64951  | mitochondrial ribosomal protein S24 (MRPS24), nuclear gene encoding mitochondrial protein, mRNA.                                                                             | -0.01 | 7.90 | 5.21E-01 | 5.65E-01 | black |

|         |        |                                                                                   |       |      |          |          |       |
|---------|--------|-----------------------------------------------------------------------------------|-------|------|----------|----------|-------|
| NA      | 552900 | bolA homolog 2 (E. coli) (BOLA2), transcript variant 2, mRNA.                     | 0.00  | 6.88 | 8.05E-01 | 8.30E-01 | black |
| NAA10   | 8260   | ARD1 homolog A, N-acetyltransferase (S. cerevisiae) (ARD1A), mRNA.                | 0.11  | 9.77 | 3.04E-08 | 6.85E-08 | black |
| NAA38   | 84316  | LSM domain containing 1 (LSMD1), mRNA.                                            | 0.05  | 6.81 | 6.39E-06 | 1.23E-05 | black |
| NARF    | 26502  | nuclear prelamin A recognition factor (NARF), transcript variant 1, mRNA.         | 0.08  | 7.87 | 3.70E-07 | 7.75E-07 | black |
| NCBP2   | 22916  | nuclear cap binding protein subunit 2, 20kDa (NCBP2), transcript variant 2, mRNA. | -0.08 | 7.43 | 1.60E-08 | 3.68E-08 | black |
| NDUFA11 | 126328 | NADH dehydrogenase (ubiquinone) 1 alpha subcomplex, 11, 14.7kDa (NDUFA11), mRNA.  | -0.15 | 8.89 | 2.22E-23 | 1.11E-22 | black |
| NDUFA13 | 51079  | NADH dehydrogenase (ubiquinone) 1 alpha subcomplex, 13 (NDUFA13), mRNA.           | -0.03 | 5.95 | 1.38E-02 | 1.93E-02 | black |
| NDUFA2  | 4695   | NADH dehydrogenase (ubiquinone) 1 alpha subcomplex, 2, 8kDa (NDUFA2), mRNA.       | -0.05 | 7.33 | 1.34E-02 | 1.88E-02 | black |
| NDUFA3  | 4696   | NADH dehydrogenase (ubiquinone) 1 alpha subcomplex, 3, 9kDa (NDUFA3), mRNA.       | -0.02 | 9.83 | 1.37E-01 | 1.67E-01 | black |

|         |       |                                                                                                                                                |       |      |          |          |       |
|---------|-------|------------------------------------------------------------------------------------------------------------------------------------------------|-------|------|----------|----------|-------|
| NDUFA7  | 4701  | NADH dehydrogenase (ubiquinone) 1 alpha subcomplex, 7, 14.5kDa (NDUFA7), mRNA.                                                                 | 0.23  | 7.71 | 3.63E-29 | 2.28E-28 | black |
| NDUFB11 | 54539 | NADH dehydrogenase (ubiquinone) 1 beta subcomplex, 11, 17.3kDa (NDUFB11), mRNA.                                                                | 0.06  | 7.61 | 5.50E-04 | 8.96E-04 | black |
| NDUFB2  | 4708  | NADH dehydrogenase (ubiquinone) 1 beta subcomplex, 2, 8kDa (NDUFB2), nuclear gene encoding mitochondrial protein, mRNA.                        | 0.11  | 6.53 | 5.83E-10 | 1.46E-09 | black |
| NDUFB6  | 4712  | NADH dehydrogenase (ubiquinone) 1 beta subcomplex, 6, 17kDa (NDUFB6), nuclear gene encoding mitochondrial protein, transcript variant 2, mRNA. | -0.05 | 7.66 | 7.65E-03 | 1.10E-02 | black |
| NDUFB7  | 4713  | NADH dehydrogenase (ubiquinone) 1 beta subcomplex, 7, 18kDa (NDUFB7), nuclear gene encoding mitochondrial protein, mRNA.                       | 0.00  | 7.03 | 9.10E-01 | 9.25E-01 | black |
| NDUFB9  | 4715  | NADH dehydrogenase (ubiquinone) 1 beta subcomplex, 9, 22kDa (NDUFB9), mRNA.                                                                    | -0.31 | 8.90 | 8.73E-40 | 8.65E-39 | black |

|        |        |                                                                                                        |       |      |          |          |       |
|--------|--------|--------------------------------------------------------------------------------------------------------|-------|------|----------|----------|-------|
| NETO2  | 81831  | neuropilin (NRP) and tolloid (TLL)-like 2 (NETO2), mRNA.                                               | 0.04  | 8.31 | 4.73E-03 | 6.97E-03 | black |
| NHP2   | 55651  | nucleolar protein family A, member 2 (H/ACA small nucleolar RNPs) (NOLA2), transcript variant 1, mRNA. | -0.10 | 5.43 | 6.73E-09 | 1.59E-08 | black |
| NME3   | 4832   | non-metastatic cells 3, protein expressed in (NME3), mRNA.                                             | -0.27 | 5.77 | 1.11E-35 | 9.17E-35 | black |
| NOP10  | 55505  | nucleolar protein family A, member 3 (H/ACA small nucleolar RNPs) (NOLA3), mRNA.                       | 0.00  | 7.19 | 9.80E-01 | 9.83E-01 | black |
| NRM    | 11270  | nurim (nuclear envelope membrane protein) (NRM), mRNA.                                                 | -0.27 | 6.08 | 3.51E-34 | 2.70E-33 | black |
| NUDT2  | 318    | nudix (nucleoside diphosphate linked moiety X)-type motif 2 (NUDT2), transcript variant 2, mRNA.       | 0.03  | 6.26 | 7.55E-02 | 9.61E-02 | black |
| NUDT21 | 11051  | nudix (nucleoside diphosphate linked moiety X)-type motif 21 (NUDT21), mRNA.                           | -0.02 | 9.20 | 4.23E-01 | 4.69E-01 | black |
| NUDT8  | 254552 | nudix (nucleoside diphosphate linked moiety X)-type motif 8 (NUDT8), mRNA.                             | -0.04 | 7.47 | 1.76E-02 | 2.43E-02 | black |
| NUTF2  | 10204  | nuclear transport factor 2 (NUTF2), mRNA.                                                              | 0.55  | 8.22 | 4.13E-67 | 1.63E-65 | black |
| OCIAD2 | 132299 | OCIA domain containing 2 (OCIAD2), transcript variant 1, mRNA.                                         | -0.13 | 8.42 | 1.49E-14 | 4.81E-14 | black |

|          |       |                                                                                                                                           |       |      |          |          |       |
|----------|-------|-------------------------------------------------------------------------------------------------------------------------------------------|-------|------|----------|----------|-------|
| OSGEP    | 55644 | O-sialoglycoprotein endopeptidase (OSGEP), mRNA.                                                                                          | -0.05 | 9.38 | 1.21E-03 | 1.90E-03 | black |
| PAFAH1B3 | 5050  | platelet-activating factor acetylhydrolase, isoform Ib, gamma subunit 29kDa (PAFAH1B3), mRNA.                                             | 0.04  | 6.58 | 6.92E-03 | 1.00E-02 | black |
| PAICS    | 10606 | phosphoribosylaminoimidazole carboxylase, phosphoribosylaminoimidazole succinocarboxamide synthetase (PAICS), transcript variant 3, mRNA. | -0.03 | 9.41 | 4.12E-02 | 5.43E-02 | black |
| PFDN6    | 10471 | prefoldin subunit 6 (PFDN6), mRNA.                                                                                                        | -0.72 | 7.84 | 2.71E-47 | 3.90E-46 | black |
| PHF20L1  | 51105 | PHD finger protein 20-like 1 (PHF20L1), transcript variant 1, mRNA.                                                                       | -0.08 | 8.83 | 4.43E-06 | 8.64E-06 | black |
| PHPT1    | 29085 | phosphohistidine phosphatase 1 (PHPT1), mRNA.                                                                                             | -0.19 | 7.85 | 1.38E-27 | 8.33E-27 | black |
| PI4K2B   | 55300 | phosphatidylinositol 4-kinase type 2 beta (PI4K2B), mRNA.                                                                                 | 0.00  | 9.32 | 9.62E-01 | 9.68E-01 | black |
| PJA2     | 9867  | praja 2, RING-H2 motif containing (PJA2), mRNA.                                                                                           | -0.15 | 8.93 | 9.48E-20 | 4.00E-19 | black |
| PNKD     | 25953 | paroxysmal nonkinesigenic dyskinesia (PNKD), transcript variant 1, mRNA.                                                                  | -0.08 | 7.21 | 7.34E-11 | 1.94E-10 | black |
| POLR2F   | 5435  | polymerase (RNA) II (DNA directed) polypeptide F (POLR2F), mRNA.                                                                          | -0.08 | 6.77 | 1.95E-04 | 3.30E-04 | black |

|        |       |                                                                                                                                |       |       |          |          |       |
|--------|-------|--------------------------------------------------------------------------------------------------------------------------------|-------|-------|----------|----------|-------|
| POLR2I | 5438  | polymerase (RNA) II (DNA directed) polypeptide I, 14.5kDa (POLR2I), mRNA.                                                      | -0.11 | 9.18  | 1.74E-08 | 3.98E-08 | black |
| PRDX5  | 25824 | peroxiredoxin 5 (PRDX5), nuclear gene encoding mitochondrial protein, transcript variant 1, mRNA.                              | 0.00  | 8.77  | 9.50E-01 | 9.57E-01 | black |
| PRPS1  | 5631  | phosphoribosyl pyrophosphate synthetase 1 (PRPS1), mRNA.                                                                       | 0.43  | 5.82  | 3.87E-38 | 3.64E-37 | black |
| PSMA7  | 5688  | proteasome (prosome, macropain) subunit, alpha type, 7 (PSMA7), mRNA.                                                          | 0.05  | 8.38  | 1.49E-03 | 2.31E-03 | black |
| PSMB8  | 5696  | proteasome (prosome, macropain) subunit, beta type, 8 (large multifunctional peptidase 7) (PSMB8), transcript variant 2, mRNA. | 0.05  | 8.56  | 3.09E-04 | 5.15E-04 | black |
| PSMD13 | 5719  | proteasome (prosome, macropain) 26S subunit, non-ATPase, 13 (PSMD13), transcript variant 1, mRNA.                              | -0.11 | 6.92  | 7.27E-13 | 2.15E-12 | black |
| PSMG3  | 84262 | chromosome 7 open reading frame 48 (C7orf48), mRNA.                                                                            | -0.01 | 10.55 | 5.32E-01 | 5.77E-01 | black |
| PTBP1  | 5725  | polypyrimidine tract binding protein 1 (PTBP1), transcript variant 2, mRNA.                                                    | -0.40 | 7.59  | 2.14E-66 | 8.11E-65 | black |

|          |       |                                                                             |       |       |          |          |       |
|----------|-------|-----------------------------------------------------------------------------|-------|-------|----------|----------|-------|
| PTBP3    | 9991  | ROD1 regulator of differentiation 1 ( <i>S. pombe</i> ) (ROD1), mRNA.       | -0.03 | 10.63 | 1.67E-02 | 2.31E-02 | black |
| PVRIG    | 79037 | poliovirus receptor related immunoglobulin domain containing (PVRIG), mRNA. | 0.02  | 8.01  | 9.98E-02 | 1.25E-01 | black |
| PWP1     | 11137 | PWP1 homolog ( <i>S. cerevisiae</i> ) (PWP1), mRNA.                         | 0.06  | 7.82  | 1.03E-04 | 1.79E-04 | black |
| PXMP2    | 5827  | peroxisomal membrane protein 2, 22kDa (PXMP2), mRNA.                        | -0.01 | 6.57  | 4.25E-01 | 4.71E-01 | black |
| PYCARD   | 29108 | PYD and CARD domain containing (PYCARD), transcript variant 1, mRNA.        | 0.12  | 8.31  | 4.93E-15 | 1.63E-14 | black |
| RBMX     | 27316 | RNA binding motif protein, X-linked (RBMX), mRNA.                           | 0.08  | 9.17  | 6.20E-08 | 1.37E-07 | black |
| RHOA     | 387   | ras homolog gene family, member A (RHOA), mRNA.                             | -0.02 | 5.84  | 1.02E-01 | 1.28E-01 | black |
| RIOK3    | 8780  | RIO kinase 3 (yeast) (RIOK3), transcript variant 2, mRNA.                   | -0.08 | 8.24  | 1.31E-07 | 2.83E-07 | black |
| RNASE6   | 6039  | ribonuclease, RNase A family, k6 (RNASE6), mRNA.                            | 0.03  | 7.40  | 9.49E-02 | 1.19E-01 | black |
| RNASEH2A | 10535 | ribonuclease H2, subunit A (RNASEH2A), mRNA.                                | 0.00  | 7.04  | 8.19E-01 | 8.44E-01 | black |
| RNF181   | 51255 | hypothetical protein LOC51255 (LOC51255), mRNA.                             | 0.90  | 6.66  | 1.10E-64 | 3.93E-63 | black |
| RNF20    | 56254 | ring finger protein 20 (RNF20), mRNA.                                       | 0.10  | 7.09  | 3.49E-11 | 9.36E-11 | black |

|          |        |                                                                                                                                         |       |      |          |          |       |
|----------|--------|-----------------------------------------------------------------------------------------------------------------------------------------|-------|------|----------|----------|-------|
| ROMO1    | 140823 | chromosome 20 open reading frame 52 (C20orf52), nuclear gene encoding mitochondrial protein, mRNA.                                      | 0.54  | 6.98 | 2.53E-42 | 2.87E-41 | black |
| RPL35    | 441246 | PREDICTED: similar to 60S ribosomal protein L35, transcript variant 5 (LOC441246), mRNA.                                                | 0.04  | 7.84 | 4.95E-02 | 6.46E-02 | black |
| RPL36    | 25873  | ribosomal protein L36 (RPL36), transcript variant 1, mRNA.                                                                              | -0.15 | 6.21 | 1.43E-21 | 6.56E-21 | black |
| RPS19BP1 | 91582  | ribosomal protein S19 binding protein 1 (RPS19BP1), mRNA.                                                                               | 0.14  | 7.36 | 7.97E-14 | 2.48E-13 | black |
| RPS5     | 6193   | ribosomal protein S5 (RPS5), mRNA.                                                                                                      | 0.09  | 9.42 | 6.37E-12 | 1.78E-11 | black |
| RPS9     | 6203   | ribosomal protein S9 (RPS9), mRNA.                                                                                                      | 0.01  | 7.26 | 6.71E-01 | 7.07E-01 | black |
| SCAND1   | 51282  | SCAN domain containing 1 (SCAND1), transcript variant 1, mRNA.                                                                          | -0.02 | 6.48 | 3.01E-01 | 3.45E-01 | black |
| SDHB     | 6390   | succinate dehydrogenase complex, subunit B, iron sulfur (Ip) (SDHB), mRNA.                                                              | 0.23  | 8.09 | 8.72E-38 | 8.06E-37 | black |
| SDHC     | 6391   | succinate dehydrogenase complex, subunit C, integral membrane protein, 15kDa (SDHC), nuclear gene encoding mitochondrial protein, mRNA. | 0.05  | 8.31 | 2.30E-04 | 3.88E-04 | black |
| SEC61B   | 10952  | Sec61 beta subunit (SEC61B), mRNA.                                                                                                      | 0.04  | 8.06 | 1.37E-05 | 2.57E-05 | black |



|         |       |                                                                                                                             |       |      |          |          |       |
|---------|-------|-----------------------------------------------------------------------------------------------------------------------------|-------|------|----------|----------|-------|
| SF3B5   | 83443 | splicing factor 3b, subunit 5, 10kDa (SF3B5), mRNA.                                                                         | -0.12 | 8.47 | 1.88E-19 | 7.81E-19 | black |
| SIVA1   | 10572 | SIVA1, apoptosis-inducing factor (SIVA1), transcript variant 1, mRNA.                                                       | -0.18 | 6.60 | 5.90E-25 | 3.19E-24 | black |
| SLC27A5 | 10998 | solute carrier family 27 (fatty acid transporter), member 5 (SLC27A5), mRNA.                                                | -0.11 | 7.97 | 1.85E-07 | 3.97E-07 | black |
| SMARCD2 | 6603  | SWI/SNF related, matrix associated, actin dependent regulator of chromatin, subfamily d, member 2 (SMARCD2), mRNA.          | 0.12  | 9.04 | 9.35E-13 | 2.74E-12 | black |
| SOD2    | 6648  | superoxide dismutase 2, mitochondrial (SOD2), nuclear gene encoding mitochondrial protein, transcript variant 2, mRNA.      | 0.03  | 6.83 | 5.13E-02 | 6.68E-02 | black |
| SPAG7   | 9552  | sperm associated antigen 7 (SPAG7), mRNA.                                                                                   | -0.17 | 5.88 | 6.32E-22 | 2.94E-21 | black |
| SRBD1   | 55133 | S1 RNA binding domain 1 (SRBD1), mRNA.                                                                                      | 0.01  | 7.48 | 4.21E-01 | 4.67E-01 | black |
| SRP54   | 6729  | signal recognition particle 54kDa (SRP54), mRNA.                                                                            | 0.05  | 9.26 | 1.33E-03 | 2.07E-03 | black |
| SRSF1   | 6426  | splicing factor, arginine/serine-rich 1 (splicing factor 2, alternate splicing factor) (SFRS1), transcript variant 2, mRNA. | 0.01  | 7.71 | 3.25E-01 | 3.70E-01 | black |

|          |        |                                                                                                                 |       |       |          |          |       |
|----------|--------|-----------------------------------------------------------------------------------------------------------------|-------|-------|----------|----------|-------|
| SSR4     | 6748   | signal sequence receptor, delta (translocon-associated protein delta) (SSR4), mRNA.                             | 0.35  | 6.20  | 1.99E-24 | 1.05E-23 | black |
| SUSD3    | 203328 | sushi domain containing 3 (SUSD3), mRNA.                                                                        | 0.02  | 6.50  | 1.51E-01 | 1.83E-01 | black |
| SWAP70   | 23075  | SWAP-70 protein (SWAP70), mRNA.                                                                                 | 0.03  | 6.92  | 1.44E-01 | 1.75E-01 | black |
| SYNCRIP  | 10492  | synaptotagmin binding, cytoplasmic RNA interacting protein (SYNCRIP), mRNA.                                     | 0.07  | 10.47 | 6.28E-07 | 1.30E-06 | black |
| TCEB2    | 6923   | transcription elongation factor B (SIII), polypeptide 2 (18kDa, elongin B) (TCEB2), transcript variant 2, mRNA. | -0.09 | 8.44  | 5.97E-06 | 1.15E-05 | black |
| TCTEX1D2 | 255758 | hypothetical protein MGC33212 (MGC33212), mRNA.                                                                 | 0.10  | 7.53  | 2.64E-14 | 8.41E-14 | black |
| TFDP1    | 7027   | transcription factor Dp-1 (TFDP1), mRNA.                                                                        | 0.91  | 5.82  | 1.08E-46 | 1.50E-45 | black |
| TFPT     | 29844  | TCF3 (E2A) fusion partner (in childhood Leukemia) (TFPT), mRNA.                                                 | -0.09 | 6.04  | 1.99E-11 | 5.42E-11 | black |
| TFRC     | 7037   | transferrin receptor (p90, CD71) (TFRC), mRNA.                                                                  | -0.21 | 9.23  | 2.25E-30 | 1.47E-29 | black |
| TIMM17B  | 10245  | translocase of inner mitochondrial membrane 17 homolog B (yeast) (TIMM17B), mRNA.                               | 0.00  | 11.06 | 8.99E-01 | 9.15E-01 | black |

|         |        |                                                                                                                              |       |      |          |          |       |
|---------|--------|------------------------------------------------------------------------------------------------------------------------------|-------|------|----------|----------|-------|
| TIMM8B  | 26521  | translocase of inner mitochondrial membrane 8 homolog B (yeast) (TIMM8B), mRNA.                                              | 0.07  | 9.38 | 3.65E-05 | 6.61E-05 | black |
| TMA7    | 51372  | coiled-coil domain containing 72 (CCDC72), mRNA.                                                                             | -0.11 | 5.50 | 6.31E-12 | 1.77E-11 | black |
| TMEM101 | 84336  | transmembrane protein 101 (TMEM101), mRNA.                                                                                   | 0.29  | 6.95 | 2.12E-37 | 1.91E-36 | black |
| TMEM141 | 85014  | transmembrane protein 141 (TMEM141), mRNA.                                                                                   | 0.34  | 8.56 | 2.93E-43 | 3.44E-42 | black |
| TMEM160 | 54958  | transmembrane protein 160 (TMEM160), mRNA.                                                                                   | 0.13  | 6.26 | 5.47E-13 | 1.63E-12 | black |
| TMEM208 | 29100  | HSPC171 protein (HSPC171), mRNA.                                                                                             | 0.11  | 6.90 | 1.58E-14 | 5.08E-14 | black |
| TMEM256 | 254863 | chromosome 17 open reading frame 61 (C17orf61), mRNA.                                                                        | 0.05  | 7.49 | 1.97E-05 | 3.65E-05 | black |
| TNFSF4  | 7292   | tumor necrosis factor (ligand) superfamily, member 4 (tax-transcriptionally activated glycoprotein 1, 34kDa) (TNFSF4), mRNA. | 0.08  | 8.56 | 2.26E-04 | 3.82E-04 | black |
| TPT1    | 7178   | tumor protein, translationally-controlled 1 (TPT1), mRNA.                                                                    | -0.02 | 8.11 | 2.17E-01 | 2.56E-01 | black |
| TRAPPC1 | 58485  | trafficking protein particle complex 1 (TRAPPC1), mRNA.                                                                      | 0.13  | 8.86 | 2.59E-09 | 6.25E-09 | black |

|         |       |                                                                                                                               |       |       |          |          |       |
|---------|-------|-------------------------------------------------------------------------------------------------------------------------------|-------|-------|----------|----------|-------|
| TRIM33  | 51592 | tripartite motif-containing 33 (TRIM33), transcript variant a, mRNA.                                                          | 0.21  | 6.32  | 2.48E-23 | 1.24E-22 | black |
| TRMT112 | 51504 | hypothetical protein HSPC152 (HSPC152), mRNA.                                                                                 | 0.14  | 5.83  | 1.25E-18 | 5.02E-18 | black |
| TRPT1   | 83707 | tRNA phosphotransferase 1 (TRPT1), transcript variant 1, mRNA.                                                                | -0.06 | 6.80  | 1.20E-05 | 2.27E-05 | black |
| UBL5    | 59286 | ubiquitin-like 5 (UBL5), transcript variant 1, mRNA.                                                                          | 0.17  | 7.84  | 2.50E-18 | 9.80E-18 | black |
| UFC1    | 51506 | ubiquitin-fold modifier conjugating enzyme 1 (UFC1), mRNA.                                                                    | 0.00  | 12.56 | 8.03E-01 | 8.29E-01 | black |
| UQCC2   | 84300 | chromosome 6 open reading frame 125 (C6orf125), mRNA.                                                                         | -0.01 | 9.15  | 2.23E-01 | 2.63E-01 | black |
| UQCR10  | 29796 | ubiquinol-cytochrome c reductase complex (7.2 kD) (UCRC), transcript variant 2, mRNA.                                         | 0.02  | 6.97  | 1.11E-01 | 1.38E-01 | black |
| UQCRQ   | 27089 | ubiquinol-cytochrome c reductase, complex III subunit VII, 9.5kDa (UQCRQ), nuclear gene encoding mitochondrial protein, mRNA. | -0.32 | 8.44  | 1.82E-39 | 1.78E-38 | black |
| WAS     | 7454  | Wiskott-Aldrich syndrome (eczema-thrombocytopenia) (WAS), mRNA.                                                               | -0.05 | 6.80  | 3.80E-03 | 5.65E-03 | black |
| WDR83OS | 51398 | chromosome 19 open reading frame 56 (C19orf56), mRNA.                                                                         | -0.05 | 9.08  | 2.57E-03 | 3.89E-03 | black |

|        |        |                                                                                                                    |       |       |          |          |       |
|--------|--------|--------------------------------------------------------------------------------------------------------------------|-------|-------|----------|----------|-------|
| XPOT   | 441228 | PREDICTED: similar to Exportin-T (tRNA exportin) (Exportin(tRNA)) (LOC441228), mRNA.                               | 0.07  | 7.82  | 1.19E-04 | 2.05E-04 | black |
| XRCC1  | 7515   | X-ray repair complementing defective repair in Chinese hamster cells 1 (XRCC1), mRNA.                              | -0.05 | 7.67  | 8.82E-04 | 1.41E-03 | black |
| YBEY   | 54059  | chromosome 21 open reading frame 57 (C21orf57), transcript variant 1, mRNA.                                        | 0.39  | 6.91  | 6.69E-61 | 1.93E-59 | black |
| ZC3H7A | 29066  | zinc finger CCCH-type containing 7A (ZC3H7A), mRNA.                                                                | 0.15  | 6.61  | 2.85E-17 | 1.07E-16 | black |
| ZNF330 | 27309  | zinc finger protein 330 (ZNF330), mRNA.                                                                            | -0.13 | 8.27  | 3.60E-11 | 9.66E-11 | black |
| ZNHIT1 | 10467  | zinc finger, HIT type 1 (ZNHIT1), mRNA.                                                                            | 0.05  | 10.22 | 7.10E-05 | 1.25E-04 | black |
| ZNRD1  | 30834  | zinc ribbon domain containing 1 (ZNRD1), transcript variant a, mRNA.                                               | -0.16 | 7.54  | 1.43E-17 | 5.46E-17 | black |
| MARCH6 | 10299  | membrane-associated ring finger (C3HC4) 6 (MARCH6), mRNA.                                                          | 0.07  | 8.67  | 2.23E-03 | 3.39E-03 | blue  |
| ABCB6  | 10058  | ATP-binding cassette, sub-family B (MDR/TAP), member 6 (ABCB6), nuclear gene encoding mitochondrial protein, mRNA. | -0.39 | 8.41  | 3.03E-74 | 1.71E-72 | blue  |

|       |        |                                                                                       |       |      |          |          |      |
|-------|--------|---------------------------------------------------------------------------------------|-------|------|----------|----------|------|
| ACO2  | 50     | aconitase 2, mitochondrial (ACO2), nuclear gene encoding mitochondrial protein, mRNA. | 0.48  | 8.73 | 3.31E-68 | 1.37E-66 | blue |
| ACOT2 | 10965  | acyl-CoA thioesterase 2 (ACOT2), mRNA.                                                | -0.08 | 9.81 | 1.63E-09 | 3.99E-09 | blue |
| ACP1  | 52     | acid phosphatase 1, soluble (ACP1), transcript variant 2, mRNA.                       | 0.21  | 7.98 | 1.71E-35 | 1.40E-34 | blue |
| ACTA2 | 59     | actin, alpha 2, smooth muscle, aorta (ACTA2), mRNA.                                   | -0.24 | 7.91 | 8.67E-33 | 6.33E-32 | blue |
| ACTG1 | 71     | actin, gamma 1 (ACTG1), mRNA.                                                         | 0.08  | 8.62 | 9.89E-13 | 2.90E-12 | blue |
| ACTR2 | 10097  | ARP2 actin-related protein 2 homolog (yeast) (ACTR2), transcript variant 2, mRNA.     | 0.13  | 9.79 | 1.82E-15 | 6.17E-15 | blue |
| ADA   | 100    | adenosine deaminase (ADA), mRNA.                                                      | 0.01  | 6.06 | 5.66E-01 | 6.09E-01 | blue |
| ADD3  | 120    | adducin 3 (gamma) (ADD3), transcript variant 1, mRNA.                                 | -0.02 | 7.30 | 1.74E-01 | 2.09E-01 | blue |
| ADK   | 132    | adenosine kinase (ADK), transcript variant ADK-long, mRNA.                            | -0.02 | 7.92 | 1.64E-02 | 2.27E-02 | blue |
| ADSS  | 159    | adenylosuccinate synthase (ADSS), mRNA.                                               | 0.03  | 8.33 | 8.08E-02 | 1.02E-01 | blue |
| AFMID | 125061 | arylformamidase (AFMID), mRNA.                                                        | -0.09 | 8.19 | 5.76E-12 | 1.62E-11 | blue |
| AGAP3 | 116988 | centaurin, gamma 3 (CENTG3), transcript variant 1, mRNA.                              | 0.02  | 7.99 | 7.44E-02 | 9.48E-02 | blue |
| AGFG1 | 3267   | HIV-1 Rev binding protein (HRB), mRNA.                                                | 0.01  | 8.18 | 2.66E-01 | 3.08E-01 | blue |

|        |        |                                                                                                                                          |       |      |          |          |      |
|--------|--------|------------------------------------------------------------------------------------------------------------------------------------------|-------|------|----------|----------|------|
| AGPAT2 | 10555  | 1-acylglycerol-3-phosphate O-acyltransferase 2 (lysophosphatidic acid acyltransferase, beta) (AGPAT2), transcript variant 1, mRNA.       | 0.17  | 7.68 | 4.65E-24 | 2.41E-23 | blue |
| AGPAT3 | 56894  | 1-acylglycerol-3-phosphate O-acyltransferase 3 (AGPAT3), transcript variant 2, mRNA.                                                     | 0.22  | 6.70 | 2.88E-26 | 1.64E-25 | blue |
| AGPS   | 8540   | alkylglycerone phosphate synthase (AGPS), mRNA.                                                                                          | 0.04  | 8.85 | 6.24E-04 | 1.01E-03 | blue |
| AHCYL1 | 10768  | S-adenosylhomocysteine hydrolase-like 1 (AHCYL1), mRNA.                                                                                  | -0.04 | 8.43 | 2.48E-02 | 3.37E-02 | blue |
| AIDA   | 64853  | chromosome 1 open reading frame 80 (C1orf80), mRNA.                                                                                      | -0.13 | 7.82 | 3.44E-06 | 6.76E-06 | blue |
| AIFM1  | 9131   | apoptosis-inducing factor, mitochondrion-associated, 1 (AIFM1), nuclear gene encoding mitochondrial protein, transcript variant 1, mRNA. | 0.09  | 7.86 | 3.84E-09 | 9.21E-09 | blue |
| AIP    | 9049   | aryl hydrocarbon receptor interacting protein (AIP), mRNA.                                                                               | 0.52  | 8.13 | 5.35E-79 | 4.52E-77 | blue |
| AK4    | 387851 | adenylate kinase 3-like 2 (AK3L2), mRNA.                                                                                                 | -0.01 | 7.30 | 3.99E-01 | 4.45E-01 | blue |
| AKR1B1 | 231    | aldo-keto reductase family 1, member B1 (aldose reductase) (AKR1B1), mRNA.                                                               | 0.12  | 5.72 | 6.93E-14 | 2.17E-13 | blue |

|         |       |                                                                                                          |       |       |          |          |      |
|---------|-------|----------------------------------------------------------------------------------------------------------|-------|-------|----------|----------|------|
| ALDH6A1 | 4329  | aldehyde dehydrogenase 6 family, member A1 (ALDH6A1), nuclear gene encoding mitochondrial protein, mRNA. | 0.02  | 12.05 | 1.47E-01 | 1.79E-01 | blue |
| ALDOA   | 226   | aldolase A, fructose-bisphosphate (ALDOA), transcript variant 2, mRNA.                                   | 0.05  | 9.70  | 1.54E-05 | 2.89E-05 | blue |
| AMD1    | 262   | adenosylmethionine decarboxylase 1 (AMD1), transcript variant 1, mRNA.                                   | -0.23 | 9.83  | 3.70E-37 | 3.28E-36 | blue |
| AMFR    | 267   | autocrine motility factor receptor (AMFR), mRNA.                                                         | -0.08 | 6.12  | 4.68E-08 | 1.04E-07 | blue |
| ANP32C  | 23520 | acidic (leucine-rich) nuclear phosphoprotein 32 family, member C (ANP32C), mRNA.                         | 0.69  | 5.98  | 8.84E-63 | 2.84E-61 | blue |
| ANXA2   | 302   | annexin A2 (ANXA2), transcript variant 2, mRNA.                                                          | -0.13 | 7.07  | 7.98E-11 | 2.10E-10 | blue |
| AP1S1   | 1174  | adaptor-related protein complex 1, sigma 1 subunit (AP1S1), transcript variant 1, mRNA.                  | 0.32  | 6.38  | 6.89E-45 | 8.76E-44 | blue |
| AP1S2   | 8905  | adaptor-related protein complex 1, sigma 2 subunit (AP1S2), mRNA.                                        | -0.03 | 6.74  | 1.31E-02 | 1.84E-02 | blue |
| AP2S1   | 1175  | adaptor-related protein complex 2, sigma 1 subunit (AP2S1), transcript variant AP17, mRNA.               | -0.34 | 10.41 | 1.62E-45 | 2.14E-44 | blue |
| APIP    | 51074 | APAF1 interacting protein (APIP), mRNA.                                                                  | 0.02  | 7.93  | 2.81E-01 | 3.24E-01 | blue |



|          |        |                                                                                          |       |       |          |          |      |
|----------|--------|------------------------------------------------------------------------------------------|-------|-------|----------|----------|------|
| APOBEC3B | 9582   | apolipoprotein B mRNA editing enzyme, catalytic polypeptide-like 3B (APOBEC3B), mRNA.    | 0.21  | 8.09  | 2.95E-18 | 1.15E-17 | blue |
| ARF3     | 377    | ADP-ribosylation factor 3 (ARF3), mRNA.                                                  | -0.23 | 6.38  | 9.47E-23 | 4.62E-22 | blue |
| ARL6IP6  | 151188 | ADP-ribosylation-like factor 6 interacting protein 6 (ARL6IP6), mRNA.                    | -0.01 | 9.41  | 3.87E-01 | 4.33E-01 | blue |
| ARMC8    | 25852  | armadillo repeat containing 8 (ARMC8), transcript variant 3, mRNA.                       | -0.02 | 12.64 | 1.01E-01 | 1.26E-01 | blue |
| ARMCX6   | 54470  | armadillo repeat containing, X-linked 6 (ARMCX6), transcript variant 1, mRNA.            | -0.10 | 8.29  | 1.39E-09 | 3.42E-09 | blue |
| ARPC2    | 10109  | actin related protein 2/3 complex, subunit 2, 34kDa (ARPC2), transcript variant 1, mRNA. | -0.02 | 8.50  | 2.65E-01 | 3.07E-01 | blue |
| ARPC4    | 10093  | actin related protein 2/3 complex, subunit 4, 20kDa (ARPC4), transcript variant 2, mRNA. | 0.10  | 9.48  | 4.42E-12 | 1.25E-11 | blue |
| ARSD     | 414    | arylsulfatase D (ARSD), transcript variant 1, mRNA.                                      | -0.14 | 8.36  | 1.03E-21 | 4.74E-21 | blue |
| ASNSD1   | 54529  | asparagine synthetase domain containing 1 (ASNSD1), mRNA.                                | 0.08  | 6.70  | 4.31E-08 | 9.60E-08 | blue |
| ASS1     | 445    | argininosuccinate synthetase 1 (ASS1), transcript variant 1, mRNA.                       | -0.13 | 5.56  | 1.25E-11 | 3.45E-11 | blue |

|          |        |                                                                                                                                              |       |      |           |           |      |
|----------|--------|----------------------------------------------------------------------------------------------------------------------------------------------|-------|------|-----------|-----------|------|
| ASXL2    | 55252  | additional sex combs like 2 (Drosophila) (ASXL2), mRNA.                                                                                      | 0.10  | 7.08 | 5.41E-15  | 1.79E-14  | blue |
| ATP1B3   | 483    | ATPase, Na <sup>+</sup> /K <sup>+</sup> transporting, beta 3 polypeptide (ATP1B3), mRNA. XM_945518                                           | -0.52 | 7.99 | 1.77E-72  | 9.06E-71  | blue |
| ATP2A2   | 488    | ATPase, Ca <sup>++</sup> transporting, cardiac muscle, slow twitch 2 (ATP2A2), transcript variant 2, mRNA.                                   | -0.51 | 6.46 | 9.82E-63  | 3.13E-61  | blue |
| ATP5F1   | 515    | ATP synthase, H <sup>+</sup> transporting, mitochondrial F0 complex, subunit B1 (ATP5F1), nuclear gene encoding mitochondrial protein, mRNA. | 0.21  | 7.40 | 4.49E-32  | 3.19E-31  | blue |
| ATP6V0E1 | 8992   | ATPase, H <sup>+</sup> transporting, lysosomal 9kDa, V0 subunit e1 (ATP6V0E1), mRNA.                                                         | 0.09  | 7.55 | 9.62E-10  | 2.37E-09  | blue |
| ATRAID   | 51374  | chromosome 2 open reading frame 28 (C2orf28), transcript variant 1, mRNA.                                                                    | -0.08 | 9.48 | 2.62E-13  | 7.93E-13  | blue |
| AUP1     | 550    | ancient ubiquitous protein 1 (AUP1), mRNA.                                                                                                   | 0.87  | 8.05 | 1.05E-105 | 5.34E-103 | blue |
| AURKAIP1 | 727877 | PREDICTED: similar to Cyclin-L2 (Paneth cell-enhanced expression protein), transcript variant 2 (LOC727877), mRNA.                           | -0.08 | 8.23 | 2.05E-14  | 6.56E-14  | blue |

|          |       |                                                                               |       |      |           |           |      |
|----------|-------|-------------------------------------------------------------------------------|-------|------|-----------|-----------|------|
| B3GNT2   | 10678 | UDP-GlcNAc:betaGal beta-1,3-N-acetylglucosaminyltransferase 2 (B3GNT2), mRNA. | 0.12  | 7.51 | 3.99E-11  | 1.07E-10  | blue |
| BCAS4    | 55653 | breast carcinoma amplified sequence 4 (BCAS4), transcript variant 3, mRNA.    | 0.00  | 9.17 | 7.02E-01  | 7.36E-01  | blue |
| BCAT2    | 587   | branched chain aminotransferase 2, mitochondrial (BCAT2), mRNA.               | 0.13  | 7.83 | 1.74E-16  | 6.23E-16  | blue |
| BICD2    | 23299 | bicaudal D homolog 2 (Drosophila) (BICD2), transcript variant 2, mRNA.        | -1.49 | 8.88 | 5.09E-107 | 2.87E-104 | blue |
| BPNT1    | 10380 | 3'(2'), 5'-bisphosphate nucleotidase 1 (BPNT1), mRNA.                         | -0.08 | 7.85 | 1.33E-10  | 3.44E-10  | blue |
| BRMS1    | 25855 | breast cancer metastasis suppressor 1 (BRMS1), transcript variant 3, mRNA.    | -0.19 | 7.74 | 3.87E-31  | 2.61E-30  | blue |
| BTBD1    | 53339 | BTB (POZ) domain containing 1 (BTBD1), transcript variant 1, mRNA.            | 0.17  | 7.50 | 7.72E-18  | 2.97E-17  | blue |
| C11orf73 | 51501 | chromosome 11 open reading frame 73 (C11orf73), mRNA.                         | -0.02 | 9.73 | 1.03E-01  | 1.29E-01  | blue |
| C1orf43  | 25912 | chromosome 1 open reading frame 43 (C1orf43), transcript variant 1, mRNA.     | 0.32  | 9.20 | 9.36E-50  | 1.45E-48  | blue |

|          |        |                                                                                                                          |       |      |          |          |      |
|----------|--------|--------------------------------------------------------------------------------------------------------------------------|-------|------|----------|----------|------|
| C21orf33 | 8209   | chromosome 21 open reading frame 33 (C21orf33), nuclear gene encoding mitochondrial protein, transcript variant 1, mRNA. | 0.18  | 6.58 | 7.33E-23 | 3.60E-22 | blue |
| C9orf85  | 138241 | chromosome 9 open reading frame 85 (C9orf85), mRNA.                                                                      | 0.00  | 9.00 | 6.51E-01 | 6.89E-01 | blue |
| CACYBP   | 27101  | calcyclin binding protein (CACYBP), transcript variant 1, mRNA.                                                          | -0.07 | 6.17 | 3.04E-07 | 6.40E-07 | blue |
| CALU     | 813    | calumenin (CALU), mRNA.                                                                                                  | -0.07 | 6.03 | 4.35E-07 | 9.07E-07 | blue |
| CANX     | 821    | calnexin (CANX), transcript variant 1, mRNA.                                                                             | 0.04  | 8.41 | 7.11E-03 | 1.03E-02 | blue |
| CAPRIN1  | 4076   | GPI-anchored membrane protein 1 (GPIAP1), transcript variant 2, mRNA.                                                    | -0.06 | 6.58 | 1.36E-03 | 2.12E-03 | blue |
| CAT      | 847    | catalase (CAT), mRNA.                                                                                                    | 0.00  | 7.54 | 6.24E-01 | 6.64E-01 | blue |
| CCM2     | 83605  | cerebral cavernous malformation 2 (CCM2), transcript variant 2, mRNA.                                                    | 0.19  | 5.73 | 5.11E-21 | 2.28E-20 | blue |
| CCNK     | 8812   | cyclin K (CCNK), mRNA.                                                                                                   | -0.12 | 8.11 | 1.59E-19 | 6.65E-19 | blue |
| CCS      | 9973   | copper chaperone for superoxide dismutase (CCS), mRNA.                                                                   | -0.04 | 8.71 | 3.22E-04 | 5.36E-04 | blue |
| CCT7     | 10574  | chaperonin containing TCP1, subunit 7 (eta) (CCT7), transcript variant 1, mRNA.                                          | -0.32 | 9.44 | 7.30E-45 | 9.27E-44 | blue |
| CCZ1     | 51622  | chromosome 7 open reading frame 28A (C7orf28A), mRNA.                                                                    | 0.13  | 6.50 | 1.04E-11 | 2.87E-11 | blue |

|          |        |                                                                                          |       |       |          |          |      |
|----------|--------|------------------------------------------------------------------------------------------|-------|-------|----------|----------|------|
| CD151    | 977    | CD151 molecule (Raph blood group) (CD151), transcript variant 1, mRNA.                   | 0.30  | 7.05  | 5.16E-47 | 7.36E-46 | blue |
| CD79A    | 973    | CD79a molecule, immunoglobulin-associated alpha (CD79A), transcript variant 1, mRNA.     | -0.38 | 9.31  | 1.26E-53 | 2.28E-52 | blue |
| CD79B    | 974    | CD79b molecule, immunoglobulin-associated beta (CD79B), transcript variant 1, mRNA.      | 0.07  | 9.56  | 2.00E-05 | 3.71E-05 | blue |
| CDAN1    | 146059 | congenital dyserythropoietic anemia, type I (CDAN1), mRNA.                               | 0.32  | 8.39  | 3.03E-52 | 5.17E-51 | blue |
| CDC26    | 246184 | cell division cycle 26 homolog ( <i>S. cerevisiae</i> ) (CDC26), mRNA.                   | -0.01 | 5.63  | 4.54E-01 | 5.00E-01 | blue |
| CDC42    | 998    | cell division cycle 42 (GTP binding protein, 25kDa) (CDC42), transcript variant 2, mRNA. | -0.15 | 10.85 | 3.00E-29 | 1.89E-28 | blue |
| CDC42SE2 | 56990  | CDC42 small effector 2 (CDC42SE2), transcript variant 1, mRNA.                           | 0.05  | 7.66  | 1.10E-05 | 2.09E-05 | blue |
| CDC45    | 8318   | CDC45 cell division cycle 45-like ( <i>S. cerevisiae</i> ) (CDC45L), mRNA.               | -0.01 | 9.39  | 7.15E-01 | 7.48E-01 | blue |
| CDK14    | 5218   | PFTAIRE protein kinase 1 (PFTK1), mRNA.                                                  | -0.19 | 7.02  | 3.38E-34 | 2.61E-33 | blue |
| CDK2     | 1017   | cyclin-dependent kinase 2 (CDK2), transcript variant 1, mRNA.                            | 1.05  | 8.60  | 1.27E-77 | 9.06E-76 | blue |
| CDKN1B   | 1027   | cyclin-dependent kinase inhibitor 1B (p27, Kip1) (CDKN1B), mRNA.                         | 0.11  | 7.10  | 4.16E-08 | 9.28E-08 | blue |

|          |       |                                                                        |       |       |          |          |      |
|----------|-------|------------------------------------------------------------------------|-------|-------|----------|----------|------|
| CDKN2AIP | 55602 | CDKN2A interacting protein (CDKN2AIP), mRNA.                           | -0.02 | 8.49  | 3.59E-02 | 4.77E-02 | blue |
| CEBPG    | 1054  | CCAAT/enhancer binding protein (C/EBP), gamma (CEBPG), mRNA.           | 0.07  | 6.16  | 2.42E-09 | 5.84E-09 | blue |
| CENPM    | 79019 | centromere protein M (CENPM), transcript variant 1, mRNA.              | -0.22 | 11.13 | 2.02E-36 | 1.74E-35 | blue |
| CHD4     | 1108  | chromodomain helicase DNA binding protein 4 (CHD4), mRNA.              | 0.11  | 7.90  | 2.36E-21 | 1.07E-20 | blue |
| CHD8     | 57680 | chromodomain helicase DNA binding protein 8 (CHD8), mRNA.              | -0.01 | 6.04  | 6.31E-01 | 6.71E-01 | blue |
| CHI3L2   | 1117  | chitinase 3-like 2 (CHI3L2), transcript variant 3, mRNA.               | 0.23  | 8.17  | 1.34E-21 | 6.18E-21 | blue |
| CHMP1B   | 57132 | chromatin modifying protein 1B (CHMP1B), mRNA.                         | 0.05  | 6.41  | 7.92E-03 | 1.14E-02 | blue |
| CHMP2A   | 27243 | chromatin modifying protein 2A (CHMP2A), transcript variant 1, mRNA.   | -0.38 | 8.99  | 4.84E-59 | 1.30E-57 | blue |
| CKAP5    | 9793  | cytoskeleton associated protein 5 (CKAP5), transcript variant 1, mRNA. | 0.11  | 8.22  | 1.73E-09 | 4.22E-09 | blue |
| CLK3     | 1198  | CDC-like kinase 3 (CLK3), transcript variant phclk3, mRNA.             | -0.13 | 7.74  | 3.88E-16 | 1.36E-15 | blue |
| CNIH1    | 10175 | cornichon homolog (Drosophila) (CNIH), transcript variant 2, mRNA.     | -0.04 | 7.59  | 2.72E-03 | 4.09E-03 | blue |
| CNN2     | 1265  | calponin 2 (CNN2), transcript variant 1, mRNA.                         | -0.10 | 7.32  | 9.73E-12 | 2.70E-11 | blue |

|         |        |                                                                                                                    |       |       |          |          |      |
|---------|--------|--------------------------------------------------------------------------------------------------------------------|-------|-------|----------|----------|------|
| CNN3    | 1266   | calponin 3, acidic (CNN3), mRNA.                                                                                   | -0.02 | 9.13  | 1.17E-01 | 1.45E-01 | blue |
| CNOT10  | 25904  | CCR4-NOT transcription complex, subunit 10 (CNOT10), mRNA.                                                         | 0.12  | 11.72 | 3.72E-14 | 1.18E-13 | blue |
| CNPY3   | 10695  | trinucleotide repeat containing 5 (TNRC5), transcript variant 1, mRNA.                                             | 0.25  | 7.85  | 1.75E-35 | 1.43E-34 | blue |
| COPZ1   | 22818  | coatamer protein complex, subunit zeta 1 (COPZ1), mRNA.                                                            | 0.06  | 8.70  | 8.11E-07 | 1.66E-06 | blue |
| CRTAP   | 10491  | PREDICTED: cartilage associated protein (CRTAP), mRNA.                                                             | 0.34  | 6.19  | 2.41E-41 | 2.56E-40 | blue |
| CRY2    | 1408   | cryptochrome 2 (photolyase-like) (CRY2), mRNA.                                                                     | 0.02  | 9.44  | 3.54E-01 | 3.99E-01 | blue |
| CTNNB1  | 1499   | catenin (cadherin-associated protein), beta 1, 88kDa (CTNNB1), mRNA.<br>XM_945653 XM_945654<br>XM_945655 XM_945657 | -0.05 | 6.43  | 2.31E-03 | 3.51E-03 | blue |
| CXorf56 | 63932  | chromosome X open reading frame 56 (CXorf56), mRNA.                                                                | -0.06 | 9.61  | 1.78E-06 | 3.57E-06 | blue |
| CYP4V2  | 285440 | cytochrome P450, family 4, subfamily V, polypeptide 2 (CYP4V2), mRNA.                                              | -0.05 | 8.39  | 4.99E-07 | 1.03E-06 | blue |
| DAZAP1  | 26528  | DAZ associated protein 1 (DAZAP1), transcript variant 2, mRNA.                                                     | -0.09 | 7.24  | 2.32E-04 | 3.91E-04 | blue |
| DCK     | 1633   | deoxycytidine kinase (DCK), mRNA.                                                                                  | 1.42  | 6.83  | 2.21E-99 | 8.64E-97 | blue |

|         |        |                                                                                                        |       |      |          |          |      |
|---------|--------|--------------------------------------------------------------------------------------------------------|-------|------|----------|----------|------|
| DCUN1D1 | 54165  | DCN1, defective in cullin neddylation 1, domain containing 1 ( <i>S. cerevisiae</i> ) (DCUN1D1), mRNA. | 0.00  | 7.87 | 8.11E-01 | 8.37E-01 | blue |
| DDX17   | 10521  | DEAD (Asp-Glu-Ala-Asp) box polypeptide 17 (DDX17), transcript variant 1, mRNA.                         | -0.08 | 9.27 | 8.18E-08 | 1.79E-07 | blue |
| DDX47   | 51202  | DEAD (Asp-Glu-Ala-Asp) box polypeptide 47 (DDX47), transcript variant 1, mRNA.                         | -0.05 | 8.83 | 3.09E-04 | 5.15E-04 | blue |
| DEPDC1B | 55789  | DEP domain containing 1B (DEPDC1B), mRNA.                                                              | 0.00  | 6.66 | 9.39E-01 | 9.48E-01 | blue |
| DHRS1   | 115817 | dehydrogenase/reductase (SDR family) member 1 (DHRS1), mRNA.                                           | -0.01 | 6.98 | 6.68E-01 | 7.05E-01 | blue |
| DHRS4   | 10901  | dehydrogenase/reductase (SDR family) member 4 (DHRS4), mRNA.                                           | -0.04 | 7.17 | 7.00E-03 | 1.02E-02 | blue |
| DHRS4L2 | 317749 | dehydrogenase/reductase (SDR family) member 4 like 2 (DHRS4L2), mRNA.                                  | -0.04 | 8.66 | 5.51E-03 | 8.08E-03 | blue |
| DHX33   | 56919  | DEAH (Asp-Glu-Ala-His) box polypeptide 33 (DHX33), mRNA.                                               | -0.09 | 7.78 | 1.53E-06 | 3.08E-06 | blue |
| DHX9    | 1660   | DEAH (Asp-Glu-Ala-His) box polypeptide 9 (DHX9), mRNA.                                                 | 0.44  | 8.39 | 6.61E-62 | 2.01E-60 | blue |



|          |       |                                                                                                      |       |       |          |          |      |
|----------|-------|------------------------------------------------------------------------------------------------------|-------|-------|----------|----------|------|
| DICER1   | 23405 | Dicer1, Dcr-1 homolog (Drosophila) (DICER1), transcript variant 1, mRNA.                             | -0.02 | 9.07  | 3.27E-02 | 4.35E-02 | blue |
| DNAJC7   | 7266  | DnaJ (Hsp40) homolog, subfamily C, member 7 (DNAJC7), mRNA.                                          | -0.21 | 10.10 | 6.85E-44 | 8.22E-43 | blue |
| DPM1     | 8813  | dolichyl-phosphate mannosyltransferase polypeptide 1, catalytic subunit (DPM1), mRNA.                | 0.38  | 7.44  | 6.84E-54 | 1.28E-52 | blue |
| DPP3     | 10072 | dipeptidyl-peptidase 3 (DPP3), transcript variant 2, mRNA.                                           | 0.07  | 7.66  | 3.26E-04 | 5.42E-04 | blue |
| DPP7     | 29952 | dipeptidyl-peptidase 7 (DPP7), mRNA.                                                                 | -0.03 | 8.98  | 2.17E-03 | 3.31E-03 | blue |
| DTYMK    | 1841  | deoxythymidylate kinase (thymidylate kinase) (DTYMK), mRNA.                                          | -0.08 | 8.92  | 1.97E-09 | 4.78E-09 | blue |
| DUS3L    | 56931 | dihydrouridine synthase 3-like (S. cerevisiae) (DUS3L), mRNA.                                        | -0.06 | 10.88 | 5.67E-08 | 1.26E-07 | blue |
| DUT      | 1854  | dUTP pyrophosphatase (DUT), nuclear gene encoding mitochondrial protein, transcript variant 1, mRNA. | 0.10  | 8.58  | 2.01E-08 | 4.59E-08 | blue |
| DYNC2LI1 | 51626 | dynein, cytoplasmic 2, light intermediate chain 1 (DYNC2LI1), transcript variant 2, mRNA.            | 0.00  | 6.13  | 8.65E-01 | 8.86E-01 | blue |
| DYNLRB1  | 83658 | dynein, light chain, roadblock-type 1 (DYNLRB1), mRNA.                                               | 0.62  | 6.03  | 3.36E-56 | 7.17E-55 | blue |

|        |        |                                                                                                                      |       |       |          |          |      |
|--------|--------|----------------------------------------------------------------------------------------------------------------------|-------|-------|----------|----------|------|
| ECD    | 11319  | ecdysoneless homolog (Drosophila) (ECD), mRNA.                                                                       | 0.62  | 7.26  | 2.76E-78 | 2.12E-76 | blue |
| ECH1   | 1891   | enoyl Coenzyme A hydratase 1, peroxisomal (ECH1), mRNA.                                                              | 0.61  | 6.74  | 2.43E-78 | 1.93E-76 | blue |
| EEF1A1 | 1915   | eukaryotic translation elongation factor 1 alpha 1 (EEF1A1), mRNA.                                                   | 0.00  | 6.41  | 8.16E-01 | 8.41E-01 | blue |
| EEF1B2 | 1933   | eukaryotic translation elongation factor 1 beta 2 (EEF1B2), transcript variant 1, mRNA.                              | 0.12  | 6.97  | 7.55E-14 | 2.35E-13 | blue |
| EIF3F  | 8665   | eukaryotic translation initiation factor 3, subunit 5 epsilon, 47kDa (EIF3S5), mRNA.                                 | 0.13  | 6.49  | 1.04E-16 | 3.81E-16 | blue |
| EIF3M  | 10480  | PCI domain containing 1 (herpesvirus entry mediator) (PCID1), mRNA.                                                  | -0.01 | 8.55  | 4.97E-01 | 5.42E-01 | blue |
| EIF4H  | 653994 | PREDICTED: similar to eukaryotic translation initiation factor 4H isoform 2, transcript variant 5 (LOC653994), mRNA. | -0.05 | 10.20 | 1.43E-06 | 2.89E-06 | blue |
| EIF4H  | 7458   | eukaryotic translation initiation factor 4H (EIF4H), transcript variant 1, mRNA.                                     | -0.03 | 6.59  | 5.43E-02 | 7.04E-02 | blue |
| EIF5   | 1983   | eukaryotic translation initiation factor 5 (EIF5), transcript variant 1, mRNA.                                       | 0.00  | 8.13  | 9.94E-01 | 9.95E-01 | blue |

|       |       |                                                                                                                                                                      |       |       |          |          |      |
|-------|-------|----------------------------------------------------------------------------------------------------------------------------------------------------------------------|-------|-------|----------|----------|------|
| ELMO1 | 9844  | engulfment and cell motility 1 (ELMO1), transcript variant 1, mRNA.                                                                                                  | -0.29 | 7.58  | 7.12E-44 | 8.52E-43 | blue |
| EML2  | 24139 | echinoderm microtubule associated protein like 2 (EML2), mRNA.                                                                                                       | -0.02 | 7.92  | 2.50E-01 | 2.91E-01 | blue |
| ENO2  | 2026  | enolase 2 (gamma, neuronal) (ENO2), mRNA.                                                                                                                            | 0.04  | 6.48  | 1.13E-02 | 1.60E-02 | blue |
| ENSA  | 2029  | endosulfine alpha (ENSA), transcript variant 8, mRNA.                                                                                                                | -0.05 | 8.01  | 4.69E-03 | 6.92E-03 | blue |
| ERCC1 | 2067  | excision repair cross-complementing rodent repair deficiency, complementation group 1 (includes overlapping antisense sequence) (ERCC1), transcript variant 2, mRNA. | 0.02  | 8.58  | 3.69E-01 | 4.15E-01 | blue |
| ETFB  | 2109  | electron-transfer-flavoprotein, beta polypeptide (ETFB), transcript variant 1, mRNA.                                                                                 | 0.07  | 5.98  | 1.27E-06 | 2.57E-06 | blue |
| ETV6  | 2120  | ets variant gene 6 (TEL oncogene) (ETV6), mRNA.                                                                                                                      | 0.02  | 7.33  | 2.16E-01 | 2.56E-01 | blue |
| EWSR1 | 2130  | Ewing sarcoma breakpoint region 1 (EWSR1), transcript variant EWS, mRNA.                                                                                             | 0.11  | 6.91  | 1.78E-15 | 6.03E-15 | blue |
| EZH2  | 2146  | enhancer of zeste homolog 2 (Drosophila) (EZH2), transcript variant 1, mRNA.                                                                                         | 0.64  | 6.71  | 1.64E-79 | 1.43E-77 | blue |
| FAF1  | 11124 | Fas (TNFRSF6) associated factor 1 (FAF1), mRNA.                                                                                                                      | 0.31  | 10.03 | 4.99E-39 | 4.80E-38 | blue |

|         |        |                                                                                           |       |       |          |          |      |
|---------|--------|-------------------------------------------------------------------------------------------|-------|-------|----------|----------|------|
| FAHD1   | 81889  | fumarylacetoacetate hydrolase domain containing 1 (FAHD1), transcript variant 1, mRNA.    | 0.10  | 9.15  | 4.82E-14 | 1.52E-13 | blue |
| FAM172A | 83989  | chromosome 5 open reading frame 21 (C5orf21), mRNA.                                       | -0.51 | 7.62  | 3.12E-71 | 1.48E-69 | blue |
| FAM174A | 345757 | transmembrane protein 157 (TMEM157), mRNA.                                                | 0.12  | 9.13  | 1.21E-10 | 3.15E-10 | blue |
| FAM195A | 84331  | chromosome 16 open reading frame 14 (C16orf14), mRNA.                                     | 0.06  | 7.54  | 1.58E-06 | 3.18E-06 | blue |
| FAM213A | 84293  | chromosome 10 open reading frame 58 (C10orf58), mRNA.                                     | 0.05  | 9.35  | 1.48E-03 | 2.30E-03 | blue |
| FAM3C   | 10447  | family with sequence similarity 3, member C (FAM3C), transcript variant 1, mRNA.          | 0.03  | 6.76  | 6.56E-02 | 8.43E-02 | blue |
| FBXO22  | 26263  | F-box protein 22 (FBXO22), transcript variant 2, mRNA.                                    | -0.02 | 7.81  | 1.67E-01 | 2.01E-01 | blue |
| FBXO7   | 25793  | F-box protein 7 (FBXO7), transcript variant 1, mRNA.                                      | 0.28  | 6.34  | 5.21E-38 | 4.86E-37 | blue |
| FEM1C   | 56929  | fem-1 homolog c (C. elegans) (FEM1C), mRNA.                                               | 0.09  | 10.39 | 2.53E-13 | 7.66E-13 | blue |
| FEN1    | 2237   | flap structure-specific endonuclease 1 (FEN1), mRNA.                                      | 0.07  | 7.18  | 1.82E-03 | 2.81E-03 | blue |
| FEZ1    | 9638   | fasciculation and elongation protein zeta 1 (zygin I) (FEZ1), transcript variant 1, mRNA. | -0.07 | 8.70  | 6.80E-07 | 1.40E-06 | blue |

|         |       |                                                                                                                                         |       |      |          |          |      |
|---------|-------|-----------------------------------------------------------------------------------------------------------------------------------------|-------|------|----------|----------|------|
| FIGNL1  | 63979 | fidgetin-like 1 (FIGNL1), transcript variant 2, mRNA.                                                                                   | 0.03  | 5.81 | 7.33E-02 | 9.35E-02 | blue |
| FNTA    | 2339  | farnesyltransferase, CAAX box, alpha (FNTA), transcript variant 1, mRNA.                                                                | 0.06  | 7.25 | 2.48E-04 | 4.17E-04 | blue |
| FOCAD   | 54914 | KIAA1797 (KIAA1797), mRNA.                                                                                                              | 0.16  | 6.04 | 4.60E-22 | 2.16E-21 | blue |
| FTL     | 2512  | ferritin, light polypeptide (FTL), mRNA.                                                                                                | 0.00  | 7.85 | 9.46E-01 | 9.54E-01 | blue |
| GALK2   | 2585  | galactokinase 2 (GALK2), transcript variant 1, mRNA.                                                                                    | 0.34  | 6.25 | 1.37E-52 | 2.36E-51 | blue |
| GALNT10 | 55568 | UDP-N-acetyl-alpha-D-galactosamine:polypeptide N-acetylgalactosaminyltransferase 10 (GalNAc-T10) (GALNT10), transcript variant 2, mRNA. | -0.15 | 9.72 | 1.34E-23 | 6.79E-23 | blue |
| GANAB   | 23193 | glucosidase, alpha; neutral AB (GANAB), transcript variant 2, mRNA.                                                                     | 0.07  | 9.55 | 4.13E-05 | 7.43E-05 | blue |
| GAR1    | 54433 | nucleolar protein family A, member 1 (H/ACA small nucleolar RNPs) (NOLA1), transcript variant 1, mRNA.                                  | -0.14 | 7.79 | 1.60E-11 | 4.37E-11 | blue |

|        |        |                                                                                                                                                                |       |      |          |          |      |
|--------|--------|----------------------------------------------------------------------------------------------------------------------------------------------------------------|-------|------|----------|----------|------|
| GART   | 2618   | phosphoribosylglycinamide formyltransferase, phosphoribosylglycinamide synthetase, phosphoribosylaminoimidazole synthetase (GART), transcript variant 2, mRNA. | 0.02  | 5.96 | 2.77E-01 | 3.20E-01 | blue |
| GATM   | 2628   | glycine amidinotransferase (L-arginine:glycine amidinotransferase) (GATM), nuclear gene encoding mitochondrial protein, mRNA.                                  | 0.09  | 9.61 | 1.21E-06 | 2.45E-06 | blue |
| GFM2   | 84340  | G elongation factor, mitochondrial 2 (GFM2), nuclear gene encoding mitochondrial protein, transcript variant 3, mRNA.                                          | -0.15 | 6.96 | 5.65E-21 | 2.52E-20 | blue |
| GGCT   | 79017  | chromosome 7 open reading frame 24 (C7orf24), mRNA.                                                                                                            | -0.08 | 8.50 | 4.33E-13 | 1.30E-12 | blue |
| GLCCI1 | 113263 | glucocorticoid induced transcript 1 (GLCCI1), mRNA.                                                                                                            | -0.04 | 8.92 | 1.04E-01 | 1.30E-01 | blue |
| GNG10  | 2790   | guanine nucleotide binding protein (G protein), gamma 10 (GNG10), mRNA.                                                                                        | -0.04 | 8.05 | 2.22E-03 | 3.38E-03 | blue |
| GNG2   | 54331  | guanine nucleotide binding protein (G protein), gamma 2 (GNG2), mRNA.                                                                                          | -0.01 | 9.68 | 6.94E-01 | 7.28E-01 | blue |
| GOSR2  | 9570   | golgi SNAP receptor complex member 2 (GOSR2), transcript variant B, mRNA.                                                                                      | 0.34  | 7.79 | 6.38E-61 | 1.85E-59 | blue |

|         |        |                                                                                         |       |       |          |          |      |
|---------|--------|-----------------------------------------------------------------------------------------|-------|-------|----------|----------|------|
| GPAA1   | 8733   | glycosylphosphatidylinositol anchor attachment protein 1 homolog (yeast) (GPAA1), mRNA. | -0.03 | 11.71 | 2.22E-02 | 3.03E-02 | blue |
| GPR15   | 2838   | G protein-coupled receptor 15 (GPR15), mRNA.                                            | 0.05  | 10.85 | 3.48E-05 | 6.31E-05 | blue |
| GPX7    | 2882   | glutathione peroxidase 7 (GPX7), mRNA.                                                  | -0.08 | 5.88  | 2.39E-07 | 5.09E-07 | blue |
| GRAP    | 391157 | PREDICTED: similar to GRB2-related adapter protein (LOC391157), mRNA.                   | -0.06 | 7.97  | 2.74E-06 | 5.41E-06 | blue |
| GRB2    | 2885   | growth factor receptor-bound protein 2 (GRB2), transcript variant 1, mRNA.              | -0.06 | 6.04  | 4.36E-04 | 7.19E-04 | blue |
| GRN     | 2896   | granulin (GRN), mRNA.                                                                   | -0.09 | 7.93  | 8.88E-08 | 1.94E-07 | blue |
| GSR     | 2936   | glutathione reductase (GSR), mRNA.                                                      | 0.02  | 6.91  | 4.86E-02 | 6.35E-02 | blue |
| GTF2H2  | 2966   | general transcription factor IIH, polypeptide 2, 44kDa (GTF2H2), mRNA.                  | -0.14 | 6.27  | 3.68E-18 | 1.44E-17 | blue |
| GTF2H3  | 2967   | general transcription factor IIH, polypeptide 3, 34kDa (GTF2H3), mRNA.                  | 0.08  | 7.74  | 2.04E-07 | 4.36E-07 | blue |
| GUCY1A3 | 2982   | guanylate cyclase 1, soluble, alpha 3 (GUCY1A3), mRNA.                                  | 0.00  | 7.10  | 7.25E-01 | 7.57E-01 | blue |
| H3F3C   | 440093 | similar to H3 histone, family 3B (LOC440093), mRNA.                                     | -0.03 | 10.40 | 2.23E-02 | 3.04E-02 | blue |

|        |        |                                                                                                                              |       |       |          |          |      |
|--------|--------|------------------------------------------------------------------------------------------------------------------------------|-------|-------|----------|----------|------|
| HAT1   | 8520   | histone acetyltransferase 1 (HAT1), transcript variant 1, mRNA.                                                              | -0.11 | 9.80  | 7.04E-17 | 2.59E-16 | blue |
| HAUS1  | 115106 | coiled-coil domain containing 5 (spindle associated) (CCDC5), mRNA.                                                          | 0.08  | 8.47  | 2.13E-04 | 3.60E-04 | blue |
| HELLS  | 3070   | helicase, lymphoid-specific (HELLS), mRNA.                                                                                   | 0.02  | 10.47 | 1.29E-01 | 1.58E-01 | blue |
| HIBADH | 11112  | 3-hydroxyisobutyrate dehydrogenase (HIBADH), mRNA.                                                                           | 0.01  | 7.62  | 5.82E-01 | 6.24E-01 | blue |
| HIF1A  | 3091   | hypoxia-inducible factor 1, alpha subunit (basic helix-loop-helix transcription factor) (HIF1A), transcript variant 1, mRNA. | 0.04  | 7.80  | 7.81E-03 | 1.13E-02 | blue |
| HLA-C  | 3107   | major histocompatibility complex, class I, C (HLA-C), mRNA.                                                                  | 0.08  | 6.50  | 2.18E-08 | 4.95E-08 | blue |
| HLA-F  | 3134   | major histocompatibility complex, class I, F (HLA-F), mRNA.                                                                  | -0.04 | 8.81  | 7.21E-03 | 1.04E-02 | blue |
| HM13   | 81502  | histocompatibility (minor) 13 (HM13), transcript variant 1, mRNA.                                                            | 0.01  | 6.30  | 6.92E-01 | 7.27E-01 | blue |
| HMBS   | 3145   | hydroxymethylbilane synthase (HMBS), transcript variant 1, mRNA.                                                             | -0.15 | 7.10  | 3.62E-21 | 1.63E-20 | blue |
| HMGN2  | 3151   | high-mobility group nucleosomal binding domain 2 (HMGN2), mRNA.                                                              | 0.03  | 12.22 | 6.24E-02 | 8.03E-02 | blue |
| HMHB1  | 57824  | histocompatibility (minor) HB-1 (HMHB1), mRNA.                                                                               | -0.11 | 7.57  | 1.68E-11 | 4.60E-11 | blue |



|          |        |                                                                                                                           |       |       |          |          |      |
|----------|--------|---------------------------------------------------------------------------------------------------------------------------|-------|-------|----------|----------|------|
| HNRNPA1  | 3178   | heterogeneous nuclear ribonucleoprotein A1 (HNRPA1), transcript variant 1, mRNA.                                          | -0.31 | 7.50  | 4.83E-44 | 5.87E-43 | blue |
| HNRNPA3  | 220988 | heterogeneous nuclear ribonucleoprotein A3 (HNRPA3), mRNA.                                                                | 0.04  | 10.55 | 5.06E-03 | 7.43E-03 | blue |
| HNRNPH1  | 3187   | heterogeneous nuclear ribonucleoprotein H1 (H) (HNRPH1), mRNA.                                                            | -0.15 | 8.64  | 9.07E-14 | 2.81E-13 | blue |
| HNRNPK   | 3190   | heterogeneous nuclear ribonucleoprotein K (HNRPK), transcript variant 3, mRNA.                                            | -0.13 | 7.57  | 9.26E-11 | 2.42E-10 | blue |
| HNRNPM   | 4670   | heterogeneous nuclear ribonucleoprotein M (HNRPM), transcript variant 1, mRNA.                                            | -0.07 | 6.37  | 1.67E-07 | 3.58E-07 | blue |
| HOXC4    | 3221   | homeobox C4 (HOXC4), transcript variant 2, mRNA.                                                                          | -0.09 | 9.57  | 1.22E-08 | 2.82E-08 | blue |
| HSD17B11 | 51170  | hydroxysteroid (17-beta) dehydrogenase 11 (HSD17B11), mRNA.                                                               | -0.18 | 8.04  | 2.15E-29 | 1.36E-28 | blue |
| HSPBP1   | 23640  | hsp70-interacting protein (HSPBP1), mRNA.                                                                                 | 0.03  | 10.70 | 2.27E-02 | 3.09E-02 | blue |
| HSPD1    | 3329   | heat shock 60kDa protein 1 (chaperonin) (HSPD1), nuclear gene encoding mitochondrial protein, transcript variant 1, mRNA. | -0.04 | 7.51  | 1.33E-02 | 1.86E-02 | blue |

|        |       |                                                                                                           |       |       |          |          |      |
|--------|-------|-----------------------------------------------------------------------------------------------------------|-------|-------|----------|----------|------|
| HTRA2  | 27429 | HtrA serine peptidase 2 (HTRA2), nuclear gene encoding mitochondrial protein, transcript variant 1, mRNA. | -0.05 | 6.63  | 3.09E-04 | 5.15E-04 | blue |
| ICAM2  | 3384  | intercellular adhesion molecule 2 (ICAM2), mRNA.                                                          | 0.01  | 8.79  | 1.70E-01 | 2.05E-01 | blue |
| IDH1   | 3417  | isocitrate dehydrogenase 1 (NADP+), soluble (IDH1), mRNA.                                                 | -0.21 | 9.88  | 6.04E-16 | 2.11E-15 | blue |
| IFIT3  | 3437  | interferon-induced protein with tetratricopeptide repeats 3 (IFIT3), mRNA.                                | -0.31 | 8.13  | 4.47E-42 | 5.02E-41 | blue |
| IKZF3  | 22806 | IKAROS family zinc finger 3 (Aiolos) (IKZF3), transcript variant 4, mRNA.                                 | -0.38 | 6.73  | 1.79E-35 | 1.46E-34 | blue |
| IL10RB | 3588  | interleukin 10 receptor, beta (IL10RB), mRNA.                                                             | 0.03  | 8.56  | 1.43E-02 | 2.00E-02 | blue |
| ILF3   | 3609  | interleukin enhancer binding factor 3, 90kDa (ILF3), transcript variant 2, mRNA.                          | -0.24 | 7.32  | 1.58E-35 | 1.30E-34 | blue |
| INPP5B | 3633  | inositol polyphosphate-5-phosphatase, 75kDa (INPP5B), nuclear gene encoding mitochondrial protein, mRNA.  | 0.00  | 10.10 | 7.82E-01 | 8.11E-01 | blue |
| INTS10 | 55174 | integrator complex subunit 10 (INTS10), mRNA.                                                             | -0.20 | 7.47  | 2.87E-25 | 1.57E-24 | blue |
| IP6K2  | 51447 | inositol hexaphosphate kinase 2 (IHPK2), transcript variant 4, mRNA.                                      | 0.17  | 9.94  | 1.31E-22 | 6.32E-22 | blue |

|          |       |                                                                                                                                    |       |       |          |          |      |
|----------|-------|------------------------------------------------------------------------------------------------------------------------------------|-------|-------|----------|----------|------|
| IPO7     | 10527 | importin 7 (IPO7), mRNA.                                                                                                           | -0.14 | 9.87  | 4.34E-23 | 2.15E-22 | blue |
| ITGB1    | 3688  | integrin, beta 1 (fibronectin receptor, beta polypeptide, antigen CD29 includes MDF2, MSK12) (ITGB1), transcript variant 1E, mRNA. | -0.11 | 7.57  | 7.23E-10 | 1.80E-09 | blue |
| ITPK1    | 3705  | inositol 1,3,4-triphosphate 5/6 kinase (ITPK1), mRNA.                                                                              | 0.09  | 6.92  | 9.96E-10 | 2.45E-09 | blue |
| KAT6A    | 7994  | MYST histone acetyltransferase (monocytic leukemia) 3 (MYST3), mRNA.                                                               | 0.12  | 9.00  | 9.94E-18 | 3.81E-17 | blue |
| KIAA1551 | 55196 | chromosome 12 open reading frame 35 (C12orf35), mRNA.                                                                              | 0.08  | 7.65  | 2.53E-07 | 5.36E-07 | blue |
| KIF1B    | 23095 | kinesin family member 1B (KIF1B), transcript variant 1, mRNA.                                                                      | 0.07  | 6.25  | 1.05E-05 | 1.99E-05 | blue |
| KIF3B    | 9371  | kinesin family member 3B (KIF3B), mRNA.                                                                                            | -0.09 | 11.45 | 9.07E-14 | 2.81E-13 | blue |
| KIF5B    | 3799  | kinesin family member 5B (KIF5B), mRNA.                                                                                            | -0.02 | 6.80  | 1.86E-01 | 2.22E-01 | blue |
| KNSTRN   | 90417 | chromosome 15 open reading frame 23 (C15orf23), mRNA.                                                                              | 0.98  | 8.51  | 3.23E-87 | 4.97E-85 | blue |
| KYNU     | 8942  | kynureninase (L-kynurenine hydrolase) (KYNU), transcript variant 1, mRNA.                                                          | 0.07  | 10.55 | 2.04E-05 | 3.79E-05 | blue |
| LGALS3   | 3958  | lectin, galactoside-binding, soluble, 3 (LGALS3), transcript variant 1, mRNA.                                                      | -0.05 | 9.51  | 3.07E-04 | 5.12E-04 | blue |

|        |       |                                                                                 |       |       |          |          |      |
|--------|-------|---------------------------------------------------------------------------------|-------|-------|----------|----------|------|
| LIMS1  | 3987  | LIM and senescent cell antigen-like domains 1 (LIMS1), mRNA.                    | -0.17 | 10.29 | 4.18E-29 | 2.62E-28 | blue |
| LLGL1  | 3996  | lethal giant larvae homolog 1 (Drosophila) (LLGL1), mRNA.                       | -0.01 | 7.24  | 3.98E-01 | 4.44E-01 | blue |
| LLPH   | 84298 | chromosome 12 open reading frame 31 (C12orf31), mRNA.                           | 0.06  | 7.88  | 1.68E-04 | 2.86E-04 | blue |
| LMAN1  | 3998  | lectin, mannose-binding, 1 (LMAN1), mRNA.                                       | 0.11  | 7.81  | 1.19E-09 | 2.92E-09 | blue |
| LMNB2  | 84823 | lamin B2 (LMNB2), mRNA.                                                         | -0.10 | 8.57  | 7.33E-12 | 2.04E-11 | blue |
| LRFN4  | 78999 | leucine rich repeat and fibronectin type III domain containing 4 (LRFN4), mRNA. | 0.00  | 8.27  | 7.51E-01 | 7.82E-01 | blue |
| LRRC40 | 55631 | leucine rich repeat containing 40 (LRRC40), mRNA.                               | -0.07 | 7.24  | 3.81E-06 | 7.47E-06 | blue |
| LSP1   | 4046  | lymphocyte-specific protein 1 (LSP1), transcript variant 1, mRNA.               | -0.13 | 9.08  | 1.63E-12 | 4.71E-12 | blue |
| LTBR   | 4055  | lymphotoxin beta receptor (TNFR superfamily, member 3) (LTBR), mRNA.            | 0.27  | 5.76  | 1.16E-37 | 1.06E-36 | blue |
| LY9    | 4063  | lymphocyte antigen 9 (LY9), transcript variant 1, mRNA.                         | -0.06 | 7.81  | 2.05E-07 | 4.37E-07 | blue |
| LYPLA1 | 10434 | lysophospholipase I (LYPLA1), mRNA.                                             | -0.39 | 10.86 | 8.08E-39 | 7.75E-38 | blue |
| LYRM7  | 90624 | hypothetical protein LOC90624 (LOC90624), mRNA.                                 | -0.08 | 9.89  | 2.48E-11 | 6.70E-11 | blue |
| M6PR   | 4074  | mannose-6-phosphate receptor (cation dependent) (M6PR), mRNA.                   | 0.40  | 5.52  | 4.06E-23 | 2.01E-22 | blue |

|          |       |                                                                                                                                  |       |       |          |          |      |
|----------|-------|----------------------------------------------------------------------------------------------------------------------------------|-------|-------|----------|----------|------|
| MAD1L1   | 8379  | MAD1 mitotic arrest deficient-like 1 (yeast) (MAD1L1), transcript variant 3, mRNA.                                               | 0.01  | 5.73  | 6.92E-01 | 7.27E-01 | blue |
| MAD2L1BP | 9587  | MAD2L1 binding protein (MAD2L1BP), transcript variant 2, mRNA.                                                                   | -0.01 | 8.88  | 4.04E-01 | 4.49E-01 | blue |
| MAEA     | 10296 | macrophage erythroblast attacher (MAEA), transcript variant 1, mRNA.                                                             | 0.14  | 8.11  | 1.64E-19 | 6.84E-19 | blue |
| MAP1LC3B | 81631 | microtubule-associated protein 1 light chain 3 beta (MAP1LC3B), mRNA.                                                            | -0.08 | 8.48  | 2.07E-13 | 6.31E-13 | blue |
| MAPKAP1  | 79109 | mitogen-activated protein kinase associated protein 1 (MAPKAP1), transcript variant 6, mRNA.                                     | -0.16 | 5.81  | 3.75E-18 | 1.47E-17 | blue |
| MAT2B    | 27430 | methionine adenosyltransferase II, beta (MAT2B), transcript variant 2, mRNA.                                                     | 0.18  | 10.20 | 1.44E-30 | 9.47E-30 | blue |
| MBD2     | 8932  | methyl-CpG binding domain protein 2 (MBD2), transcript variant testis-specific, mRNA.                                            | 0.07  | 8.14  | 6.10E-04 | 9.87E-04 | blue |
| MCAT     | 27349 | malonyl CoA:ACP acyltransferase (mitochondrial) (MCAT), nuclear gene encoding mitochondrial protein, transcript variant 1, mRNA. | 0.07  | 7.90  | 1.87E-04 | 3.18E-04 | blue |

|          |       |                                                                                                                  |       |       |          |          |      |
|----------|-------|------------------------------------------------------------------------------------------------------------------|-------|-------|----------|----------|------|
| MCRS1    | 10445 | microspherule protein 1 (MCRS1), transcript variant 1, mRNA.                                                     | -0.12 | 7.45  | 2.61E-10 | 6.70E-10 | blue |
| MDM1     | 56890 | Mdm4, transformed 3T3 cell double minute 1, p53 binding protein (mouse) (MDM1), transcript variant 1, mRNA.      | 0.05  | 9.39  | 6.43E-04 | 1.04E-03 | blue |
| ME2      | 4200  | malic enzyme 2, NAD(+)-dependent, mitochondrial (ME2), nuclear gene encoding mitochondrial protein, mRNA.        | -0.14 | 8.02  | 3.19E-29 | 2.01E-28 | blue |
| MED16    | 10025 | thyroid hormone receptor associated protein 5 (THRAP5), mRNA.                                                    | 0.08  | 8.00  | 1.55E-06 | 3.12E-06 | blue |
| METTL21B | 25895 | family with sequence similarity 119, member B (FAM119B), transcript variant 1, mRNA.                             | -0.06 | 8.89  | 6.80E-08 | 1.50E-07 | blue |
| MFGE8    | 4240  | milk fat globule-EGF factor 8 protein (MFGE8), mRNA.                                                             | -0.05 | 7.64  | 1.90E-03 | 2.92E-03 | blue |
| MGAT2    | 4247  | mannosyl (alpha-1,6-)-glycoprotein beta-1,2-N-acetylglucosaminyltransferase (MGAT2), transcript variant 1, mRNA. | -0.15 | 7.76  | 1.52E-18 | 6.07E-18 | blue |
| MGST1    | 4257  | microsomal glutathione S-transferase 1 (MGST1), transcript variant 1c, mRNA.                                     | -0.13 | 11.50 | 1.52E-16 | 5.48E-16 | blue |

|          |       |                                                                                                  |       |       |          |          |      |
|----------|-------|--------------------------------------------------------------------------------------------------|-------|-------|----------|----------|------|
| MICAL1   | 64780 | microtubule associated monooxygenase, calponin and LIM domain containing 1 (MICAL1), mRNA.       | 0.01  | 5.93  | 6.95E-01 | 7.29E-01 | blue |
| MINA     | 84864 | MYC induced nuclear antigen (MINA), transcript variant 3, mRNA.                                  | 0.15  | 7.35  | 2.48E-19 | 1.03E-18 | blue |
| MIS18BP1 | 55320 | chromosome 14 open reading frame 106 (C14orf106), mRNA.                                          | 0.28  | 9.93  | 6.25E-40 | 6.24E-39 | blue |
| MOCS2    | 4338  | molybdenum cofactor synthesis 2 (MOCS2), transcript variant 1, mRNA.                             | -0.28 | 7.81  | 7.85E-37 | 6.91E-36 | blue |
| MORF4L2  | 9643  | mortality factor 4 like 2 (MORF4L2), mRNA.                                                       | -0.02 | 7.96  | 1.23E-01 | 1.52E-01 | blue |
| MPHOSPH6 | 10200 | M-phase phosphoprotein 6 (MPHOSPH6), mRNA.                                                       | 0.04  | 10.62 | 2.67E-04 | 4.47E-04 | blue |
| MR1      | 3140  | major histocompatibility complex, class I-related (MR1), mRNA.                                   | 1.34  | 6.05  | 5.87E-59 | 1.57E-57 | blue |
| MRFAP1   | 93621 | Mof4 family associated protein 1 (MRFAP1), mRNA.                                                 | 0.13  | 7.20  | 1.31E-15 | 4.47E-15 | blue |
| MRPL18   | 29074 | mitochondrial ribosomal protein L18 (MRPL18), nuclear gene encoding mitochondrial protein, mRNA. | 0.01  | 6.62  | 5.90E-01 | 6.32E-01 | blue |

|        |       |                                                                                                                        |       |      |          |          |      |
|--------|-------|------------------------------------------------------------------------------------------------------------------------|-------|------|----------|----------|------|
| MRPL30 | 51263 | mitochondrial ribosomal protein L30 (MRPL30), nuclear gene encoding mitochondrial protein, transcript variant 3, mRNA. | 0.04  | 7.36 | 1.21E-02 | 1.71E-02 | blue |
| MRPL39 | 54148 | mitochondrial ribosomal protein L39 (MRPL39), nuclear gene encoding mitochondrial protein, transcript variant 1, mRNA. | 0.07  | 8.45 | 2.73E-07 | 5.78E-07 | blue |
| MRPL45 | 84311 | mitochondrial ribosomal protein L45 (MRPL45), nuclear gene encoding mitochondrial protein, mRNA.                       | 0.01  | 6.47 | 7.13E-01 | 7.47E-01 | blue |
| MSC    | 9242  | musculin (activated B-cell factor-1) (MSC), mRNA.                                                                      | 0.05  | 8.32 | 6.95E-05 | 1.23E-04 | blue |
| MSMO1  | 6307  | sterol-C4-methyl oxidase-like (SC4MOL), transcript variant 1, mRNA.                                                    | 0.12  | 7.75 | 4.19E-19 | 1.72E-18 | blue |
| MTAP   | 4507  | methylthioadenosine phosphorylase (MTAP), mRNA.                                                                        | 0.05  | 7.37 | 1.28E-03 | 2.00E-03 | blue |
| MTRR   | 4552  | 5-methyltetrahydrofolate-homocysteine methyltransferase reductase (MTRR), transcript variant 2, mRNA.                  | 0.09  | 6.08 | 7.20E-09 | 1.69E-08 | blue |
| MTX1   | 4580  | metaxin 1 (MTX1), transcript variant 1, mRNA.                                                                          | -0.09 | 8.89 | 8.61E-09 | 2.01E-08 | blue |



|       |        |                                                                                          |       |       |          |          |      |
|-------|--------|------------------------------------------------------------------------------------------|-------|-------|----------|----------|------|
| MYL5  | 84179  | PREDICTED: major facilitator superfamily domain containing 7 (MFSD7), mRNA.              | 0.06  | 9.48  | 2.94E-04 | 4.92E-04 | blue |
| MYO9B | 4650   | myosin IXB (MYO9B), mRNA.                                                                | -0.25 | 10.22 | 9.49E-32 | 6.65E-31 | blue |
| NA    | 85002  | family with sequence similarity 86, member B1 (FAM86B1), mRNA.                           | 0.64  | 6.33  | 4.28E-67 | 1.67E-65 | blue |
| NA    | 11039  | SMA4 (SMA4), mRNA.                                                                       | 0.57  | 7.34  | 8.17E-66 | 2.98E-64 | blue |
| NA    | 440926 | PREDICTED: H3 histone, family 3A pseudogene, transcript variant 3 (LOC440926), misc RNA. | 0.49  | 7.55  | 1.75E-61 | 5.27E-60 | blue |
| NA    | 79008  | GIY-YIG domain containing 2 (GIYD2), transcript variant 1, mRNA.                         | -0.39 | 7.76  | 1.88E-60 | 5.30E-59 | blue |
| NA    | 6638   | small nuclear ribonucleoprotein polypeptide N (SNRPN), transcript variant 5, mRNA.       | -0.44 | 6.78  | 1.80E-59 | 4.90E-58 | blue |
| NA    | 51030  | family with sequence similarity 18, member B (FAM18B), mRNA.                             | 0.39  | 8.46  | 5.28E-47 | 7.51E-46 | blue |
| NA    | 57461  | ISY1 splicing factor homolog ( <i>S. cerevisiae</i> ) (ISY1), mRNA.                      | -0.26 | 8.96  | 3.72E-46 | 5.08E-45 | blue |
| NA    | 4831   | non-metastatic cells 2, protein (NM23B) expressed in (NME2), transcript variant 3, mRNA. | -0.27 | 7.27  | 5.14E-45 | 6.55E-44 | blue |

|    |        |                                                                                                             |       |       |          |          |      |
|----|--------|-------------------------------------------------------------------------------------------------------------|-------|-------|----------|----------|------|
| NA | 10384  | butyrophilin, subfamily 3, member A3 (BTN3A3), transcript variant 1, mRNA.                                  | -0.13 | 9.82  | 1.31E-14 | 4.24E-14 | blue |
| NA | 10137  | RNA binding motif protein 12 (RBM12), transcript variant 2, mRNA.                                           | -0.11 | 7.44  | 3.57E-14 | 1.13E-13 | blue |
| NA | 200316 | apolipoprotein B mRNA editing enzyme, catalytic polypeptide-like 3F (APOBEC3F), transcript variant 2, mRNA. | -0.10 | 7.19  | 1.19E-13 | 3.67E-13 | blue |
| NA | 4830   | non-metastatic cells 1, protein (NM23A) expressed in (NME1), transcript variant 1, mRNA.                    | 0.09  | 8.10  | 3.99E-10 | 1.01E-09 | blue |
| NA | 908    | chaperonin containing TCP1, subunit 6A (zeta 1) (CCT6A), transcript variant 1, mRNA.                        | 0.09  | 10.03 | 9.92E-09 | 2.31E-08 | blue |
| NA | 442535 | similar to T-cell receptor gamma chain V region PT-gamma-1/2 precursor (LOC442535), mRNA.                   | 0.05  | 8.76  | 1.41E-03 | 2.19E-03 | blue |
| NA | 5901   | RAN, member RAS oncogene family (RAN), mRNA.                                                                | 0.06  | 8.20  | 2.35E-03 | 3.57E-03 | blue |
| NA | 375260 | CXYorf1-related protein (MGC52000), mRNA.                                                                   | -0.05 | 5.94  | 5.02E-03 | 7.38E-03 | blue |
| NA | 164022 | peptidylprolyl isomerase A (cyclophilin A)-like 4 (PPIAL4), mRNA.                                           | 0.03  | 7.74  | 5.60E-02 | 7.25E-02 | blue |

|        |        |                                                                                                                                          |       |       |          |          |      |
|--------|--------|------------------------------------------------------------------------------------------------------------------------------------------|-------|-------|----------|----------|------|
| NA     | 84278  | hippocampus abundant gene transcript-like 2 (HIATL2) on chromosome 9.                                                                    | 0.02  | 8.20  | 6.43E-02 | 8.27E-02 | blue |
| NA     | 653635 | PREDICTED: similar to CXYorf1-related protein (LOC653635), mRNA.                                                                         | -0.02 | 7.04  | 1.51E-01 | 1.82E-01 | blue |
| NA     | 728554 | PREDICTED: similar to THO complex 3 (LOC728554), mRNA.                                                                                   | 0.00  | 5.82  | 8.96E-01 | 9.13E-01 | blue |
| NACA   | 4666   | nascent-polypeptide-associated complex alpha polypeptide (NACA), mRNA.                                                                   | -0.10 | 6.37  | 2.05E-09 | 4.97E-09 | blue |
| NCAPD2 | 9918   | non-SMC condensin I complex, subunit D2 (NCAPD2), mRNA.                                                                                  | -0.04 | 6.60  | 4.76E-02 | 6.23E-02 | blue |
| NCF1   | 653361 | neutrophil cytosolic factor 1, (chronic granulomatous disease, autosomal 1) (NCF1), mRNA.                                                | -0.13 | 7.04  | 1.18E-15 | 4.05E-15 | blue |
| NCL    | 4691   | nucleolin (NCL), mRNA.                                                                                                                   | 0.11  | 9.68  | 2.47E-16 | 8.79E-16 | blue |
| NDUFV3 | 4731   | NADH dehydrogenase (ubiquinone) flavoprotein 3, 10kDa (NDUFV3), nuclear gene encoding mitochondrial protein, transcript variant 1, mRNA. | 0.04  | 12.16 | 1.07E-02 | 1.52E-02 | blue |
| NEMF   | 9147   | serologically defined colon cancer antigen 1 (SDCCAG1), mRNA.                                                                            | 0.04  | 9.36  | 3.16E-02 | 4.22E-02 | blue |

|        |        |                                                                                                                          |       |      |          |          |      |
|--------|--------|--------------------------------------------------------------------------------------------------------------------------|-------|------|----------|----------|------|
| NFKBIB | 4793   | nuclear factor of kappa light polypeptide gene enhancer in B-cells inhibitor, beta (NFKBIB), transcript variant 1, mRNA. | -0.13 | 6.47 | 8.14E-19 | 3.28E-18 | blue |
| NGRN   | 51335  | neugrin, neurite outgrowth associated (NGRN), transcript variant 1, mRNA.                                                | -0.34 | 8.59 | 3.37E-50 | 5.32E-49 | blue |
| NOC4L  | 79050  | nucleolar complex associated 4 homolog (S. cerevisiae) (NOC4L), mRNA.                                                    | 0.13  | 7.87 | 1.57E-13 | 4.79E-13 | blue |
| NOMO1  | 23420  | NODAL modulator 1 (NOMO1), mRNA.                                                                                         | -0.17 | 7.01 | 4.22E-26 | 2.39E-25 | blue |
| NRDE2  | 55051  | chromosome 14 open reading frame 102 (C14orf102), transcript variant 1, mRNA.                                            | -0.07 | 7.95 | 4.73E-05 | 8.47E-05 | blue |
| NUP35  | 129401 | nucleoporin 35kDa (NUP35), transcript variant 1, mRNA.                                                                   | 0.00  | 7.28 | 9.93E-01 | 9.94E-01 | blue |
| NUP50  | 10762  | nucleoporin 50kDa (NUP50), transcript variant 3, mRNA.                                                                   | 0.08  | 7.24 | 2.00E-07 | 4.29E-07 | blue |
| OAS2   | 4939   | 2'-5'-oligoadenylate synthetase 2, 69/71kDa (OAS2), transcript variant 1, mRNA.                                          | 0.10  | 8.27 | 1.83E-11 | 4.99E-11 | blue |
| OPN3   | 23596  | opsin 3 (encephalopsin, panopsin) (OPN3), transcript variant 1, mRNA.                                                    | -0.10 | 8.80 | 2.62E-09 | 6.31E-09 | blue |
| ORC5   | 5001   | origin recognition complex, subunit 5-like (yeast) (ORC5L), transcript variant 1, mRNA.                                  | -0.09 | 8.17 | 1.14E-12 | 3.34E-12 | blue |

|        |       |                                                                               |       |       |          |          |      |
|--------|-------|-------------------------------------------------------------------------------|-------|-------|----------|----------|------|
| ORC6   | 23594 | origin recognition complex, subunit 6 like (yeast) (ORC6L), mRNA.             | -0.05 | 8.75  | 2.24E-06 | 4.46E-06 | blue |
| OSTC   | 58505 | DC2 protein (DC2), mRNA.                                                      | 0.04  | 7.08  | 5.41E-02 | 7.02E-02 | blue |
| OSTF1  | 26578 | osteoclast stimulating factor 1 (OSTF1), mRNA.                                | 0.05  | 7.67  | 9.06E-05 | 1.58E-04 | blue |
| PAAF1  | 80227 | WD repeat domain 71 (WDR71), mRNA.                                            | -0.77 | 7.45  | 4.01E-82 | 3.99E-80 | blue |
| PABPC3 | 5042  | poly(A) binding protein, cytoplasmic 3 (PABPC3), mRNA.                        | 0.10  | 8.65  | 5.30E-09 | 1.26E-08 | blue |
| PAG1   | 55824 | phosphoprotein associated with glycosphingolipid microdomains 1 (PAG1), mRNA. | -0.06 | 11.57 | 1.54E-05 | 2.89E-05 | blue |
| PARVB  | 29780 | parvin, beta (PARVB), transcript variant 2, mRNA.                             | -0.22 | 7.06  | 4.12E-28 | 2.52E-27 | blue |
| PCBP2  | 5094  | poly(rC) binding protein 2 (PCBP2), transcript variant 2, mRNA.               | 0.10  | 7.89  | 1.40E-07 | 3.02E-07 | blue |
| PCGF6  | 84108 | polycomb group ring finger 6 (PCGF6), transcript variant 1, mRNA.             | 0.00  | 5.86  | 7.84E-01 | 8.12E-01 | blue |
| PDCD10 | 11235 | programmed cell death 10 (PDCD10), transcript variant 2, mRNA.                | 0.08  | 6.77  | 1.88E-11 | 5.13E-11 | blue |
| PDCD5  | 9141  | programmed cell death 5 (PDCD5), mRNA.                                        | -0.21 | 6.75  | 1.07E-36 | 9.31E-36 | blue |
| PDIA6  | 10130 | protein disulfide isomerase family A, member 6 (PDIA6), mRNA.                 | 0.14  | 10.41 | 2.37E-24 | 1.25E-23 | blue |

|        |        |                                                                                                                                                              |       |       |          |          |      |
|--------|--------|--------------------------------------------------------------------------------------------------------------------------------------------------------------|-------|-------|----------|----------|------|
| PDPK1  | 5170   | 3-phosphoinositide dependent protein kinase-1 (PDPK1), transcript variant 1, mRNA.                                                                           | -0.45 | 8.04  | 1.09E-75 | 6.65E-74 | blue |
| PDXDC1 | 23042  | PREDICTED: KIAA0251 protein (KIAA0251), mRNA.                                                                                                                | -0.13 | 10.47 | 5.43E-13 | 1.62E-12 | blue |
| PEMT   | 10400  | phosphatidylethanolamine N-methyltransferase (PEMT), nuclear gene encoding mitochondrial protein, transcript variant 1, mRNA.                                | 0.06  | 8.27  | 6.70E-07 | 1.38E-06 | blue |
| PEX6   | 5190   | peroxisomal biogenesis factor 6 (PEX6), mRNA.                                                                                                                | 0.15  | 8.34  | 1.17E-22 | 5.65E-22 | blue |
| PFN1   | 5216   | profilin 1 (PFN1), mRNA.                                                                                                                                     | 0.03  | 10.46 | 7.50E-03 | 1.08E-02 | blue |
| PGAM1  | 643576 | PREDICTED: similar to Phosphoglycerate mutase 1 (Phosphoglycerate mutase isozyme B) (PGAM-B) (BPG-dependent PGAM 1), transcript variant 1 (LOC643576), mRNA. | -0.31 | 6.79  | 1.59E-47 | 2.32E-46 | blue |
| PGAM4  | 728188 | PREDICTED: similar to Probable phosphoglycerate mutase 4 (LOC728188), mRNA.                                                                                  | 0.13  | 8.50  | 3.44E-12 | 9.79E-12 | blue |
| PGD    | 5226   | phosphogluconate dehydrogenase (PGD), mRNA.                                                                                                                  | 0.02  | 7.62  | 3.01E-01 | 3.45E-01 | blue |
| PGK1   | 5230   | phosphoglycerate kinase 1 (PGK1), mRNA.                                                                                                                      | -0.05 | 9.06  | 1.81E-03 | 2.79E-03 | blue |
| PGM1   | 5236   | phosphoglucomutase 1 (PGM1), mRNA.                                                                                                                           | -0.01 | 7.66  | 4.61E-01 | 5.07E-01 | blue |

|         |       |                                                                                                            |       |      |          |          |      |
|---------|-------|------------------------------------------------------------------------------------------------------------|-------|------|----------|----------|------|
| PHAX    | 51808 | RNA U, small nuclear RNA export adaptor (phosphorylation regulated) (RNUXA), mRNA.                         | -0.06 | 9.92 | 6.83E-07 | 1.41E-06 | blue |
| PHF5A   | 84844 | PHD finger protein 5A (PHF5A), mRNA.                                                                       | -0.03 | 7.61 | 5.35E-02 | 6.94E-02 | blue |
| PI4KB   | 5298  | phosphatidylinositol 4-kinase, catalytic, beta polypeptide (PIK4CB), mRNA.                                 | -0.28 | 8.73 | 3.60E-39 | 3.48E-38 | blue |
| PIGK    | 10026 | phosphatidylinositol glycan anchor biosynthesis, class K (PIGK), mRNA.                                     | -0.03 | 8.65 | 3.34E-02 | 4.44E-02 | blue |
| PKMYT1  | 9088  | protein kinase, membrane associated tyrosine/threonine 1 (PKMYT1), transcript variant 1, mRNA.             | 0.04  | 9.68 | 1.32E-02 | 1.85E-02 | blue |
| PLEKHB2 | 55041 | pleckstrin homology domain containing, family B (evectins) member 2 (PLEKHB2), transcript variant 1, mRNA. | 0.12  | 6.43 | 3.16E-15 | 1.06E-14 | blue |
| PLIN3   | 10226 | mannose-6-phosphate receptor binding protein 1 (M6PRBP1), mRNA.                                            | 0.45  | 8.19 | 4.59E-51 | 7.49E-50 | blue |
| PMPCA   | 23203 | peptidase (mitochondrial processing) alpha (PMPCA), nuclear gene encoding mitochondrial protein, mRNA.     | 0.04  | 6.08 | 9.09E-03 | 1.30E-02 | blue |
| POGK    | 57645 | pogo transposable element with KRAB domain (POGK), mRNA.                                                   | -0.04 | 8.22 | 2.13E-03 | 3.25E-03 | blue |

|         |        |                                                                                         |       |      |          |          |      |
|---------|--------|-----------------------------------------------------------------------------------------|-------|------|----------|----------|------|
| POGLUT1 | 56983  | KTEL (Lys-Tyr-Glu-Leu) containing 1 (KTELC1), mRNA.                                     | 0.00  | 7.72 | 8.26E-01 | 8.50E-01 | blue |
| POLD3   | 10714  | polymerase (DNA-directed), delta 3, accessory subunit (POLD3), mRNA.                    | -0.04 | 9.34 | 9.07E-04 | 1.45E-03 | blue |
| POLE4   | 56655  | polymerase (DNA-directed), epsilon 4 (p12 subunit) (POLE4), mRNA.                       | -0.41 | 8.81 | 5.09E-51 | 8.25E-50 | blue |
| POLR1E  | 64425  | polymerase (RNA) I polypeptide E, 53kDa (POLR1E), mRNA.                                 | 0.22  | 6.05 | 6.09E-26 | 3.42E-25 | blue |
| POLR2E  | 5434   | polymerase (RNA) II (DNA directed) polypeptide E, 25kDa (POLR2E), mRNA.                 | 0.05  | 9.55 | 2.66E-04 | 4.46E-04 | blue |
| POLR2J3 | 548644 | RPB11b2alpha protein (POLR2J3), mRNA.                                                   | -0.15 | 8.73 | 3.44E-27 | 2.04E-26 | blue |
| POMP    | 51371  | proteasome maturation protein (POMP), mRNA.                                             | -0.11 | 7.06 | 3.23E-17 | 1.20E-16 | blue |
| POTEKP  | 440915 | actin-like protein (FKSG30), mRNA.                                                      | 0.00  | 5.68 | 9.48E-01 | 9.55E-01 | blue |
| PPIA    | 5478   | peptidylprolyl isomerase A (cyclophilin A) (PPIA), mRNA.                                | -0.12 | 6.09 | 7.40E-13 | 2.19E-12 | blue |
| PPID    | 5481   | peptidylprolyl isomerase D (cyclophilin D) (PPID), mRNA.                                | 0.14  | 6.60 | 1.60E-19 | 6.67E-19 | blue |
| PPIE    | 10450  | peptidylprolyl isomerase E (cyclophilin E) (PPIE), transcript variant 2, mRNA.          | -0.14 | 7.23 | 1.56E-24 | 8.28E-24 | blue |
| PPIL3   | 53938  | peptidylprolyl isomerase (cyclophilin)-like 3 (PPIL3), transcript variant PPIL3c, mRNA. | 0.03  | 8.75 | 2.33E-02 | 3.17E-02 | blue |



|         |        |                                                                                                    |       |      |          |          |      |
|---------|--------|----------------------------------------------------------------------------------------------------|-------|------|----------|----------|------|
| PPM1K   | 152926 | protein phosphatase 1K (PP2C domain containing) (PPM1K), mRNA.                                     | -0.09 | 7.94 | 5.52E-09 | 1.31E-08 | blue |
| PPP1CA  | 5499   | protein phosphatase 1, catalytic subunit, alpha isoform (PPP1CA), transcript variant 3, mRNA.      | 0.21  | 7.62 | 3.32E-16 | 1.17E-15 | blue |
| PPP1R2  | 5504   | protein phosphatase 1, regulatory (inhibitor) subunit 2 (PPP1R2), mRNA.                            | 0.25  | 5.77 | 1.02E-22 | 4.98E-22 | blue |
| PPP1R7  | 5510   | protein phosphatase 1, regulatory (inhibitor) subunit 7 (PPP1R7), mRNA.                            | 0.00  | 8.96 | 7.14E-01 | 7.48E-01 | blue |
| PPP2R2A | 5520   | protein phosphatase 2 (formerly 2A), regulatory subunit B, alpha isoform (PPP2R2A), mRNA.          | -0.01 | 8.65 | 2.01E-01 | 2.39E-01 | blue |
| PPP2R2D | 55844  | protein phosphatase 2, regulatory subunit B, delta isoform (PPP2R2D), transcript variant 1, mRNA.  | -0.01 | 8.16 | 6.20E-01 | 6.61E-01 | blue |
| PPP2R5C | 5527   | protein phosphatase 2, regulatory subunit B', gamma isoform (PPP2R5C), transcript variant 4, mRNA. | -0.01 | 8.52 | 2.09E-01 | 2.47E-01 | blue |
| PPP4R2  | 151987 | protein phosphatase 4, regulatory subunit 2 (PPP4R2), mRNA.                                        | 0.05  | 8.89 | 3.04E-05 | 5.56E-05 | blue |
| PPTC7   | 160760 | PTC7 protein phosphatase homolog (S. cerevisiae) (PPTC7), mRNA.                                    | 0.01  | 8.30 | 4.67E-01 | 5.13E-01 | blue |

|         |       |                                                                                                    |       |      |          |          |      |
|---------|-------|----------------------------------------------------------------------------------------------------|-------|------|----------|----------|------|
| PRDX3   | 10935 | peroxiredoxin 3 (PRDX3), nuclear gene encoding mitochondrial protein, transcript variant 2, mRNA.  | 0.05  | 7.90 | 2.18E-05 | 4.01E-05 | blue |
| PRKAG2  | 51422 | protein kinase, AMP-activated, gamma 2 non-catalytic subunit (PRKAG2), transcript variant b, mRNA. | -0.01 | 7.65 | 3.76E-01 | 4.21E-01 | blue |
| PRKAR1B | 5575  | protein kinase, cAMP-dependent, regulatory, type I, beta (PRKAR1B), mRNA.                          | -0.19 | 6.19 | 5.04E-30 | 3.26E-29 | blue |
| PRKCB   | 5579  | protein kinase C, beta 1 (PRKCB1), transcript variant 1, mRNA.                                     | 0.10  | 7.28 | 3.06E-10 | 7.78E-10 | blue |
| PRPF6   | 24148 | PRP6 pre-mRNA processing factor 6 homolog (S. cerevisiae) (PRPF6), mRNA.                           | -0.48 | 6.41 | 1.31E-53 | 2.35E-52 | blue |
| PRR11   | 55771 | proline rich 11 (PRR11), mRNA.                                                                     | 0.02  | 6.32 | 1.16E-01 | 1.44E-01 | blue |
| PRR3    | 80742 | proline rich 3 (PRR3), transcript variant 1, mRNA.                                                 | 0.04  | 7.79 | 6.01E-04 | 9.74E-04 | blue |
| PRRC2C  | 23215 | BAT2 domain containing 1 (BAT2D1), mRNA.                                                           | -0.04 | 8.05 | 1.04E-04 | 1.81E-04 | blue |
| PRSS21  | 10942 | protease, serine, 21 (testisin) (PRSS21), transcript variant 2, mRNA.                              | 0.04  | 8.06 | 4.49E-02 | 5.90E-02 | blue |
| PRTFDC1 | 56952 | phosphoribosyl transferase domain containing 1 (PRTFDC1), mRNA.                                    | 0.09  | 7.85 | 1.00E-11 | 2.77E-11 | blue |

|         |        |                                                                                             |       |       |          |          |      |
|---------|--------|---------------------------------------------------------------------------------------------|-------|-------|----------|----------|------|
| PSMA1   | 5682   | proteasome (prosome, macropain) subunit, alpha type, 1 (PSMA1), transcript variant 2, mRNA. | -0.21 | 7.79  | 6.85E-18 | 2.65E-17 | blue |
| PSMC4   | 5704   | proteasome (prosome, macropain) 26S subunit, ATPase, 4 (PSMC4), transcript variant 2, mRNA. | 0.17  | 7.08  | 3.78E-20 | 1.64E-19 | blue |
| PSMD6   | 9861   | proteasome (prosome, macropain) 26S subunit, non-ATPase, 6 (PSMD6), mRNA.                   | 0.03  | 8.24  | 8.99E-02 | 1.13E-01 | blue |
| PSPH    | 5723   | phosphoserine phosphatase (PSPH), mRNA.                                                     | -0.03 | 8.01  | 5.53E-02 | 7.16E-02 | blue |
| PTP4A1  | 7803   | protein tyrosine phosphatase type IVA, member 1 (PTP4A1), mRNA.                             | -0.03 | 8.57  | 4.50E-03 | 6.65E-03 | blue |
| PTPRC   | 5788   | protein tyrosine phosphatase, receptor type, C (PTPRC), transcript variant 4, mRNA.         | 1.16  | 7.08  | 9.34E-77 | 6.08E-75 | blue |
| PTTG1   | 9232   | pituitary tumor-transforming 1 (PTTG1), mRNA.                                               | 0.05  | 9.89  | 1.19E-03 | 1.86E-03 | blue |
| PTTG1IP | 754    | pituitary tumor-transforming 1 interacting protein (PTTG1IP), mRNA.                         | -0.01 | 8.27  | 5.15E-01 | 5.60E-01 | blue |
| RAB28   | 9364   | RAB28, member RAS oncogene family (RAB28), transcript variant 2, mRNA.                      | 0.13  | 6.31  | 9.39E-13 | 2.75E-12 | blue |
| RABL3   | 285282 | RAB, member of RAS oncogene family-like 3 (RABL3), mRNA.                                    | 0.40  | 10.51 | 5.88E-46 | 7.91E-45 | blue |

|        |      |                                                                                                       |       |       |          |          |      |
|--------|------|-------------------------------------------------------------------------------------------------------|-------|-------|----------|----------|------|
| RAC2   | 5880 | ras-related C3 botulinum toxin substrate 2 (rho family, small GTP binding protein Rac2) (RAC2), mRNA. | -0.11 | 10.02 | 2.29E-11 | 6.22E-11 | blue |
| RAD21  | 5885 | RAD21 homolog (S. pombe) (RAD21), mRNA.                                                               | -0.05 | 8.82  | 4.04E-04 | 6.67E-04 | blue |
| RAD51  | 5888 | RAD51 homolog (RecA homolog, E. coli) (S. cerevisiae) (RAD51), transcript variant 1, mRNA.            | 0.68  | 6.42  | 8.99E-52 | 1.51E-50 | blue |
| RAD51C | 5889 | RAD51 homolog C (S. cerevisiae) (RAD51C), transcript variant 2, mRNA.                                 | 0.32  | 5.49  | 2.08E-16 | 7.44E-16 | blue |
| RAE1   | 8480 | RAE1 RNA export 1 homolog (S. pombe) (RAE1), transcript variant 1, mRNA.                              | -0.15 | 6.93  | 7.09E-19 | 2.88E-18 | blue |
| RALB   | 5899 | v-ral simian leukemia viral oncogene homolog B (ras related; GTP binding protein) (RALB), mRNA.       | -0.21 | 9.14  | 5.89E-28 | 3.59E-27 | blue |
| RANBP1 | 5902 | RAN binding protein 1 (RANBP1), mRNA.                                                                 | 0.13  | 6.93  | 2.45E-08 | 5.55E-08 | blue |
| RBBP5  | 5929 | retinoblastoma binding protein 5 (RBBP5), mRNA.                                                       | -0.13 | 9.17  | 6.62E-16 | 2.30E-15 | blue |
| RBM3   | 5935 | RNA binding motif (RNP1, RRM) protein 3 (RBM3), transcript variant 3, mRNA.                           | -0.13 | 6.92  | 2.29E-15 | 7.71E-15 | blue |
| RBM4   | 5936 | RNA binding motif protein 4 (RBM4), mRNA.                                                             | -0.11 | 6.11  | 1.62E-11 | 4.45E-11 | blue |

|        |        |                                                                                                 |       |      |          |          |      |
|--------|--------|-------------------------------------------------------------------------------------------------|-------|------|----------|----------|------|
| RECQL  | 5965   | RecQ protein-like (DNA helicase Q1-like) (RECQL), transcript variant 2, mRNA.                   | 0.12  | 7.50 | 1.65E-17 | 6.26E-17 | blue |
| RFC2   | 5982   | replication factor C (activator 1) 2, 40kDa (RFC2), transcript variant 1, mRNA.                 | -0.66 | 6.26 | 3.48E-63 | 1.15E-61 | blue |
| RFC3   | 5983   | replication factor C (activator 1) 3, 38kDa (RFC3), transcript variant 2, mRNA.                 | -0.51 | 8.17 | 9.15E-56 | 1.92E-54 | blue |
| RFXANK | 8625   | regulatory factor X-associated ankyrin-containing protein (RFXANK), transcript variant 1, mRNA. | 0.01  | 7.61 | 5.80E-01 | 6.23E-01 | blue |
| RHPN2  | 85415  | rhophilin, Rho GTPase binding protein 2 (RHPN2), mRNA.                                          | 0.05  | 5.74 | 1.16E-03 | 1.82E-03 | blue |
| RILPL2 | 728069 | PREDICTED: similar to T-box 1 isoform C (LOC728069), mRNA.                                      | 0.23  | 6.59 | 1.99E-36 | 1.71E-35 | blue |
| RIOK1  | 83732  | RIO kinase 1 (yeast) (RIOK1), transcript variant 1, mRNA.                                       | -0.60 | 6.70 | 1.31E-83 | 1.51E-81 | blue |
| RMDN1  | 642197 | PREDICTED: similar to Protein FAM82B (LOC642197), mRNA.                                         | 0.03  | 5.70 | 1.28E-01 | 1.58E-01 | blue |
| RNF130 | 55819  | ring finger protein 130 (RNF130), mRNA.                                                         | 0.09  | 7.50 | 1.25E-06 | 2.53E-06 | blue |
| RNF4   | 6047   | ring finger protein 4 (RNF4), mRNA.                                                             | 0.12  | 8.36 | 4.25E-20 | 1.83E-19 | blue |

|        |        |                                                                        |       |       |          |          |      |
|--------|--------|------------------------------------------------------------------------|-------|-------|----------|----------|------|
| ROCK1  | 6093   | Rho-associated, coiled-coil containing protein kinase 1 (ROCK1), mRNA. | 0.00  | 10.29 | 7.30E-01 | 7.62E-01 | blue |
| RPA1   | 6117   | replication protein A1, 70kDa (RPA1), mRNA.                            | 0.01  | 7.97  | 3.37E-01 | 3.82E-01 | blue |
| RPL10A | 4736   | ribosomal protein L10a (RPL10A), mRNA.                                 | 0.01  | 7.48  | 7.01E-01 | 7.35E-01 | blue |
| RPL13  | 6137   | ribosomal protein L13 (RPL13), transcript variant 2, mRNA.             | -0.10 | 9.80  | 1.60E-11 | 4.38E-11 | blue |
| RPL13A | 23521  | ribosomal protein L13a (RPL13A), mRNA.                                 | 0.10  | 9.05  | 2.77E-10 | 7.07E-10 | blue |
| RPL15  | 6138   | ribosomal protein L15 (RPL15), mRNA.                                   | -0.04 | 8.39  | 7.07E-03 | 1.02E-02 | blue |
| RPL17  | 6139   | ribosomal protein L17 (RPL17), transcript variant 1, mRNA.             | 0.15  | 6.27  | 6.91E-14 | 2.16E-13 | blue |
| RPL18  | 441775 | PREDICTED: similar to 60S ribosomal protein L18 (LOC441775), mRNA.     | -0.18 | 6.24  | 2.66E-16 | 9.46E-16 | blue |
| RPL22  | 6146   | ribosomal protein L22 (RPL22), mRNA.                                   | 0.37  | 8.93  | 1.66E-77 | 1.17E-75 | blue |
| RPL24  | 731365 | PREDICTED: similar to ribosomal protein L24 (LOC731365), mRNA.         | -0.32 | 9.44  | 7.89E-59 | 2.10E-57 | blue |
| RPL7L1 | 731390 | PREDICTED: similar to ribosomal protein L7-like 1 (LOC731390), mRNA.   | -0.12 | 9.20  | 1.91E-12 | 5.49E-12 | blue |
| RPL8   | 6132   | ribosomal protein L8 (RPL8), transcript variant 2, mRNA.               | 0.00  | 8.52  | 8.49E-01 | 8.72E-01 | blue |

|         |       |                                                                                          |       |       |           |           |      |
|---------|-------|------------------------------------------------------------------------------------------|-------|-------|-----------|-----------|------|
| RPLP0   | 6175  | ribosomal protein, large, P0 (RPLP0), transcript variant 1, mRNA.                        | 0.09  | 6.85  | 2.46E-11  | 6.66E-11  | blue |
| RPS4X   | 6191  | ribosomal protein S4, X-linked (RPS4X), mRNA.                                            | 0.00  | 10.10 | 8.03E-01  | 8.29E-01  | blue |
| RPS6KB2 | 6199  | ribosomal protein S6 kinase, 70kDa, polypeptide 2 (RPS6KB2), transcript variant 2, mRNA. | -0.04 | 5.71  | 5.33E-03  | 7.81E-03  | blue |
| RRAS2   | 22800 | related RAS viral (r-ras) oncogene homolog 2 (RRAS2), mRNA.                              | 0.26  | 8.88  | 1.23E-37  | 1.13E-36  | blue |
| RRM2    | 6241  | ribonucleotide reductase M2 polypeptide (RRM2), mRNA.                                    | -0.15 | 9.56  | 3.40E-26  | 1.93E-25  | blue |
| RRP7A   | 27341 | CGI-96 protein (CGI-96), mRNA.                                                           | 0.42  | 7.62  | 1.19E-59  | 3.27E-58  | blue |
| RSRC1   | 51319 | arginine/serine-rich coiled-coil 1 (RSRC1), mRNA.                                        | -0.14 | 7.99  | 3.32E-23  | 1.65E-22  | blue |
| RSU1    | 6251  | Ras suppressor protein 1 (RSU1), transcript variant 1, mRNA.                             | 2.11  | 8.93  | 3.21E-113 | 3.26E-110 | blue |
| RTN3    | 10313 | reticulon 3 (RTN3), transcript variant 1, mRNA.                                          | -0.39 | 8.74  | 1.21E-54  | 2.36E-53  | blue |
| S100A13 | 6284  | S100 calcium binding protein A13 (S100A13), transcript variant 2, mRNA.                  | -0.05 | 7.92  | 1.07E-02  | 1.51E-02  | blue |
| SDAD1   | 55153 | SDA1 domain containing 1 (SDAD1), mRNA.                                                  | -0.09 | 7.76  | 9.98E-06  | 1.90E-05  | blue |

|         |        |                                                                                                                          |       |      |          |          |      |
|---------|--------|--------------------------------------------------------------------------------------------------------------------------|-------|------|----------|----------|------|
| SDHA    | 6389   | succinate dehydrogenase complex, subunit A, flavoprotein (Fp) (SDHA), nuclear gene encoding mitochondrial protein, mRNA. | -0.06 | 7.59 | 1.30E-04 | 2.23E-04 | blue |
| SDHAF3  | 57001  | ACN9 homolog ( <i>S. cerevisiae</i> ) (ACN9), mRNA.                                                                      | 0.03  | 6.71 | 2.76E-02 | 3.72E-02 | blue |
| SEH1L   | 81929  | SEH1-like ( <i>S. cerevisiae</i> ) (SEH1L), transcript variant 2, mRNA.                                                  | 0.11  | 9.63 | 1.07E-12 | 3.15E-12 | blue |
| SERBP1  | 26135  | SERPINE1 mRNA binding protein 1 (SERBP1), transcript variant 3, mRNA.                                                    | -0.03 | 7.73 | 4.35E-02 | 5.73E-02 | blue |
| SETD3   | 84193  | SET domain containing 3 (SETD3), transcript variant 2, mRNA.                                                             | 0.29  | 8.66 | 3.63E-25 | 1.98E-24 | blue |
| SF3B1   | 23451  | splicing factor 3b, subunit 1, 155kDa (SF3B1), transcript variant 2, mRNA.                                               | -0.26 | 7.51 | 1.34E-29 | 8.50E-29 | blue |
| SFR1    | 119392 | chromosome 10 open reading frame 78 (C10orf78), transcript variant 2, mRNA.                                              | 0.29  | 6.01 | 2.68E-32 | 1.93E-31 | blue |
| SKP1    | 6500   | S-phase kinase-associated protein 1A (p19A) (SKP1A), transcript variant 2, mRNA.                                         | -0.08 | 7.62 | 7.27E-11 | 1.92E-10 | blue |
| SLC10A7 | 84068  | solute carrier family 10 (sodium/bile acid cotransporter family), member 7 (SLC10A7), transcript variant 2, mRNA.        | -0.07 | 6.13 | 3.73E-06 | 7.32E-06 | blue |



|          |        |                                                                                                                                                                   |       |      |          |          |      |
|----------|--------|-------------------------------------------------------------------------------------------------------------------------------------------------------------------|-------|------|----------|----------|------|
| SLC25A15 | 10166  | solute carrier family 25 (mitochondrial carrier; ornithine transporter) member 15 (SLC25A15), nuclear gene encoding mitochondrial protein, mRNA.                  | -0.22 | 8.06 | 1.60E-37 | 1.45E-36 | blue |
| SLC25A20 | 788    | solute carrier family 25 (carnitine/acylcarnitine translocase), member 20 (SLC25A20), nuclear gene encoding mitochondrial protein, mRNA.                          | -0.25 | 6.51 | 9.27E-38 | 8.54E-37 | blue |
| SLC25A26 | 115286 | solute carrier family 25, member 26 (SLC25A26), mRNA.                                                                                                             | -0.02 | 6.56 | 7.09E-02 | 9.07E-02 | blue |
| SLC25A3  | 5250   | solute carrier family 25 (mitochondrial carrier; phosphate carrier), member 3 (SLC25A3), nuclear gene encoding mitochondrial protein, transcript variant 3, mRNA. | 0.09  | 9.11 | 1.77E-08 | 4.06E-08 | blue |
| SLC25A36 | 55186  | solute carrier family 25, member 36 (SLC25A36), mRNA.                                                                                                             | 0.05  | 8.08 | 1.32E-02 | 1.85E-02 | blue |
| SLC30A7  | 148867 | solute carrier family 30 (zinc transporter), member 7 (SLC30A7), mRNA.                                                                                            | -0.02 | 5.55 | 2.21E-01 | 2.61E-01 | blue |

|         |        |                                                                                                                                  |       |       |          |          |      |
|---------|--------|----------------------------------------------------------------------------------------------------------------------------------|-------|-------|----------|----------|------|
| SLC35A1 | 10559  | solute carrier family 35 (CMP-sialic acid transporter), member A1 (SLC35A1), mRNA.                                               | 0.04  | 11.50 | 7.07E-05 | 1.25E-04 | blue |
| SLC39A3 | 29985  | solute carrier family 39 (zinc transporter), member 3 (SLC39A3), transcript variant 1, mRNA.                                     | 0.11  | 8.51  | 3.03E-11 | 8.15E-11 | blue |
| SLC39A6 | 25800  | solute carrier family 39 (zinc transporter), member 6 (SLC39A6), mRNA.                                                           | -0.05 | 8.55  | 6.10E-04 | 9.87E-04 | blue |
| SLC3A2  | 6520   | solute carrier family 3 (activators of dibasic and neutral amino acid transport), member 2 (SLC3A2), transcript variant 6, mRNA. | -0.18 | 6.70  | 1.07E-25 | 5.97E-25 | blue |
| SLC50A1 | 55974  | recombination activating gene 1 activating protein 1 (RAG1AP1), mRNA.                                                            | 0.02  | 9.54  | 5.86E-02 | 7.57E-02 | blue |
| SLC5A6  | 8884   | solute carrier family 5 (sodium-dependent vitamin transporter), member 6 (SLC5A6), mRNA.                                         | -0.05 | 7.14  | 6.05E-05 | 1.07E-04 | blue |
| SLFN11  | 91607  | schlafen family member 11 (SLFN11), mRNA.                                                                                        | 0.07  | 9.22  | 9.91E-04 | 1.57E-03 | blue |
| SLFN5   | 162394 | schlafen family member 5 (SLFN5), mRNA.                                                                                          | 0.04  | 8.46  | 2.17E-02 | 2.96E-02 | blue |

|         |        |                                                                                                                    |       |       |          |          |      |
|---------|--------|--------------------------------------------------------------------------------------------------------------------|-------|-------|----------|----------|------|
| SLTM    | 79811  | SAFB-like, transcription modulator (SLTM), transcript variant 1, mRNA.                                             | -0.10 | 7.42  | 7.08E-09 | 1.67E-08 | blue |
| SMARCE1 | 6605   | SWI/SNF related, matrix associated, actin dependent regulator of chromatin, subfamily e, member 1 (SMARCE1), mRNA. | -0.06 | 6.83  | 3.49E-04 | 5.79E-04 | blue |
| SMS     | 646347 | PREDICTED: similar to spermine synthase (LOC646347), mRNA.                                                         | 0.14  | 6.04  | 9.90E-17 | 3.62E-16 | blue |
| SMU1    | 55234  | smu-1 suppressor of mec-8 and unc-52 homolog (C. elegans) (SMU1), mRNA.                                            | 0.03  | 8.12  | 9.59E-03 | 1.37E-02 | blue |
| SMYD2   | 56950  | SET and MYND domain containing 2 (SMYD2), mRNA.                                                                    | -0.07 | 10.13 | 2.00E-08 | 4.57E-08 | blue |
| SNAP23  | 8773   | synaptosomal-associated protein, 23kDa (SNAP23), transcript variant 1, mRNA.                                       | -0.17 | 9.35  | 2.02E-20 | 8.79E-20 | blue |
| SNRPG   | 6637   | small nuclear ribonucleoprotein polypeptide G (SNRPG), mRNA.                                                       | -0.16 | 9.66  | 1.61E-22 | 7.74E-22 | blue |
| SNX5    | 27131  | sorting nexin 5 (SNX5), transcript variant 1, mRNA.                                                                | 0.23  | 8.53  | 6.73E-31 | 4.49E-30 | blue |
| SP140   | 11262  | SP140 nuclear body protein (SP140), transcript variant 2, mRNA.                                                    | -0.13 | 8.92  | 2.16E-13 | 6.56E-13 | blue |
| SPACA3  | 124912 | sperm acrosome associated 3 (SPACA3), mRNA.                                                                        | 0.02  | 7.73  | 4.98E-02 | 6.49E-02 | blue |

|         |        |                                                                                              |       |       |          |          |      |
|---------|--------|----------------------------------------------------------------------------------------------|-------|-------|----------|----------|------|
| SPATA18 | 132671 | spermatogenesis associated 18 homolog (rat) (SPATA18), mRNA.                                 | -0.20 | 8.87  | 2.95E-37 | 2.63E-36 | blue |
| SPATA20 | 64847  | spermatogenesis associated 20 (SPATA20), mRNA.                                               | -0.15 | 7.54  | 1.08E-20 | 4.75E-20 | blue |
| SPATC1L | 84221  | chromosome 21 open reading frame 56 (C21orf56), mRNA.                                        | -0.09 | 6.55  | 2.52E-09 | 6.09E-09 | blue |
| SPRED2  | 200734 | sprouty-related, EVH1 domain containing 2 (SPRED2), mRNA.                                    | 0.01  | 8.42  | 2.38E-01 | 2.78E-01 | blue |
| SPTBN1  | 6711   | spectrin, beta, non-erythrocytic 1 (SPTBN1), transcript variant 1, mRNA.                     | -0.31 | 9.29  | 1.13E-47 | 1.66E-46 | blue |
| SPTLC1  | 10558  | serine palmitoyltransferase, long chain base subunit 1 (SPTLC1), transcript variant 1, mRNA. | -0.10 | 8.16  | 7.45E-08 | 1.64E-07 | blue |
| SQLE    | 6713   | squalene epoxidase (SQLE), mRNA.                                                             | 0.02  | 9.49  | 3.04E-02 | 4.07E-02 | blue |
| SRP9    | 6726   | signal recognition particle 9kDa (SRP9), mRNA.                                               | -0.03 | 10.20 | 3.75E-03 | 5.58E-03 | blue |
| SRPK2   | 6733   | SFRS protein kinase 2 (SRPK2), transcript variant 2, mRNA.                                   | -0.37 | 9.10  | 9.48E-58 | 2.25E-56 | blue |
| SRSF10  | 10772  | FUS interacting protein (serine/arginine-rich) 1 (FUSIP1), transcript variant 1, mRNA.       | -0.32 | 7.43  | 5.03E-55 | 1.01E-53 | blue |
| SRSF7   | 6432   | splicing factor, arginine/serine-rich 7, 35kDa (SFRS7), mRNA.                                | 0.03  | 7.70  | 8.10E-02 | 1.03E-01 | blue |

|        |        |                                                                                                  |       |       |          |          |      |
|--------|--------|--------------------------------------------------------------------------------------------------|-------|-------|----------|----------|------|
| SS18   | 6760   | synovial sarcoma translocation, chromosome 18 (SS18), transcript variant 1, mRNA.                | -0.08 | 7.68  | 7.85E-05 | 1.38E-04 | blue |
| SSR2   | 6746   | signal sequence receptor, beta (translocon-associated protein beta) (SSR2), mRNA.                | -0.03 | 8.80  | 1.25E-01 | 1.54E-01 | blue |
| SSR3   | 6747   | signal sequence receptor, gamma (translocon-associated protein gamma) (SSR3), mRNA.              | 0.01  | 7.66  | 6.56E-01 | 6.94E-01 | blue |
| SSSCA1 | 10534  | Sjogren's syndrome/scleroderma autoantigen 1 (SSSCA1), mRNA.                                     | 0.08  | 10.43 | 9.12E-07 | 1.86E-06 | blue |
| STAT6  | 6778   | signal transducer and activator of transcription 6, interleukin-4 induced (STAT6), mRNA.         | -0.04 | 9.01  | 7.66E-03 | 1.11E-02 | blue |
| STRN3  | 29966  | striatin, calmodulin binding protein 3 (STRN3), mRNA.                                            | 0.03  | 7.84  | 3.51E-02 | 4.66E-02 | blue |
| STT3B  | 201595 | STT3, subunit of the oligosaccharyltransferase complex, homolog B (S. cerevisiae) (STT3B), mRNA. | -0.08 | 7.32  | 1.80E-09 | 4.38E-09 | blue |
| SUMF2  | 25870  | sulfatase modifying factor 2 (SUMF2), transcript variant 3, mRNA.                                | 0.16  | 6.58  | 2.04E-21 | 9.27E-21 | blue |
| SUZ12  | 23512  | suppressor of zeste 12 homolog (Drosophila) (SUZ12), mRNA.                                       | -0.02 | 6.71  | 3.77E-01 | 4.23E-01 | blue |
| SYPL1  | 6856   | synaptophysin-like 1 (SYPL1), transcript variant 2, mRNA.                                        | 0.04  | 8.45  | 8.95E-03 | 1.28E-02 | blue |

|        |        |                                                                                                                              |       |      |          |          |      |
|--------|--------|------------------------------------------------------------------------------------------------------------------------------|-------|------|----------|----------|------|
| TAF5L  | 27097  | TAF5-like RNA polymerase II, p300/CBP-associated factor (PCAF)-associated factor, 65kDa (TAF5L), transcript variant 1, mRNA. | 0.02  | 6.17 | 1.68E-01 | 2.02E-01 | blue |
| TAGLN2 | 8407   | transgelin 2 (TAGLN2), mRNA.                                                                                                 | -0.11 | 7.19 | 1.66E-14 | 5.35E-14 | blue |
| TAMM41 | 132001 | chromosome 3 open reading frame 31 (C3orf31), mRNA.                                                                          | -0.02 | 7.66 | 2.90E-01 | 3.33E-01 | blue |
| TAOK1  | 57551  | TAO kinase 1 (TAOK1), mRNA.                                                                                                  | 0.04  | 8.82 | 2.58E-03 | 3.90E-03 | blue |
| TAP2   | 6891   | transporter 2, ATP-binding cassette, sub-family B (MDR/TAP) (TAP2), transcript variant 2, mRNA.                              | 0.05  | 6.84 | 3.52E-03 | 5.26E-03 | blue |
| TCEA1  | 6917   | transcription elongation factor A (SII), 1 (TCEA1), transcript variant 1, mRNA.                                              | -0.14 | 7.36 | 2.00E-15 | 6.72E-15 | blue |
| TCFL5  | 10732  | transcription factor-like 5 (basic helix-loop-helix) (TCFL5), mRNA.                                                          | 0.00  | 6.55 | 9.33E-01 | 9.44E-01 | blue |
| TCP1   | 6950   | t-complex 1 (TCP1), transcript variant 1, mRNA.                                                                              | -0.32 | 6.13 | 2.48E-49 | 3.82E-48 | blue |
| TCTN3  | 26123  | chromosome 10 open reading frame 61 (C10orf61), transcript variant 1, mRNA.                                                  | 0.22  | 8.07 | 3.17E-26 | 1.80E-25 | blue |
| TECR   | 9524   | glycoprotein, synaptic 2 (GPSN2), mRNA.                                                                                      | 0.10  | 6.16 | 1.80E-08 | 4.12E-08 | blue |
| TES    | 26136  | testis derived transcript (3 LIM domains) (TES), transcript variant 2, mRNA.                                                 | 0.04  | 5.75 | 1.02E-02 | 1.44E-02 | blue |

|          |        |                                                                                             |       |       |          |          |      |
|----------|--------|---------------------------------------------------------------------------------------------|-------|-------|----------|----------|------|
| TEX2     | 55852  | testis expressed sequence 2 (TEX2), mRNA.                                                   | -0.07 | 8.54  | 2.37E-06 | 4.72E-06 | blue |
| THAP1    | 55145  | THAP domain containing, apoptosis associated protein 1 (THAP1), transcript variant 1, mRNA. | 0.02  | 7.86  | 2.02E-01 | 2.40E-01 | blue |
| TIA1     | 7072   | TIA1 cytotoxic granule-associated RNA binding protein (TIA1), transcript variant 1, mRNA.   | 0.12  | 8.65  | 1.22E-10 | 3.17E-10 | blue |
| TMED10   | 10972  | transmembrane emp24-like trafficking protein 10 (yeast) (TMED10), mRNA.                     | -0.07 | 7.01  | 1.41E-05 | 2.66E-05 | blue |
| TMED4    | 222068 | transmembrane emp24 protein transport domain containing 4 (TMED4), mRNA.                    | 0.04  | 8.20  | 1.97E-03 | 3.02E-03 | blue |
| TMEM106C | 79022  | transmembrane protein 106C (TMEM106C), mRNA.                                                | 0.16  | 7.34  | 1.44E-17 | 5.48E-17 | blue |
| TMEM14A  | 28978  | transmembrane protein 14A (TMEM14A), mRNA.                                                  | 0.02  | 11.53 | 1.45E-01 | 1.76E-01 | blue |
| TMEM156  | 80008  | transmembrane protein 156 (TMEM156), mRNA.                                                  | 0.00  | 5.87  | 7.90E-01 | 8.17E-01 | blue |
| TMEM30A  | 55754  | transmembrane protein 30A (TMEM30A), mRNA.                                                  | 0.01  | 7.81  | 5.16E-01 | 5.60E-01 | blue |
| TMEM38B  | 55151  | transmembrane protein 38B (TMEM38B), mRNA.                                                  | -0.21 | 9.78  | 3.88E-35 | 3.12E-34 | blue |
| TMEM69   | 51249  | transmembrane protein 69 (TMEM69), mRNA.                                                    | -0.11 | 5.64  | 2.25E-11 | 6.11E-11 | blue |

|          |        |                                                                         |       |       |          |          |      |
|----------|--------|-------------------------------------------------------------------------|-------|-------|----------|----------|------|
| TMPRSS3  | 64699  | transmembrane protease, serine 3 (TMPRSS3), transcript variant D, mRNA. | -0.23 | 6.40  | 1.66E-28 | 1.03E-27 | blue |
| TNFRSF1A | 7132   | tumor necrosis factor receptor superfamily, member 1A (TNFRSF1A), mRNA. | -0.19 | 7.84  | 1.22E-21 | 5.63E-21 | blue |
| TNPO1    | 3842   | transportin 1 (TNPO1), transcript variant 2, mRNA.                      | 0.03  | 11.00 | 8.48E-03 | 1.22E-02 | blue |
| TNPO3    | 23534  | transportin 3 (TNPO3), mRNA.                                            | 0.08  | 8.16  | 1.89E-06 | 3.78E-06 | blue |
| TOP1     | 7150   | topoisomerase (DNA) I (TOP1), mRNA.                                     | 0.05  | 9.11  | 1.07E-05 | 2.04E-05 | blue |
| TOP2B    | 7155   | topoisomerase (DNA) II beta 180kDa (TOP2B), mRNA.                       | 0.04  | 10.42 | 6.83E-02 | 8.76E-02 | blue |
| TPI1     | 7167   | triosephosphate isomerase 1 (TPI1), mRNA.                               | 0.13  | 7.88  | 5.89E-12 | 1.65E-11 | blue |
| TPM3P9   | 147804 | tropomyosin 3 pseudogene (LOC147804) on chromosome 19.                  | -0.05 | 8.52  | 5.83E-03 | 8.50E-03 | blue |
| TRIM5    | 85363  | tripartite motif-containing 5 (TRIM5), transcript variant alpha, mRNA.  | 0.14  | 8.50  | 1.03E-12 | 3.00E-12 | blue |
| TRIM61   | 391712 | tripartite motif-containing 61 (TRIM61), mRNA.                          | 0.12  | 7.15  | 2.24E-12 | 6.44E-12 | blue |
| TRIP13   | 9319   | thyroid hormone receptor interactor 13 (TRIP13), mRNA.                  | 0.01  | 8.98  | 3.62E-01 | 4.07E-01 | blue |
| TSFM     | 10102  | Ts translation elongation factor, mitochondrial (TSFM), mRNA.           | -0.14 | 6.29  | 1.77E-21 | 8.07E-21 | blue |



|        |        |                                                                                             |       |      |          |          |      |
|--------|--------|---------------------------------------------------------------------------------------------|-------|------|----------|----------|------|
| TSNAX  | 7257   | translin-associated factor X (TSNAX), mRNA.                                                 | -0.09 | 7.96 | 3.20E-10 | 8.13E-10 | blue |
| TSPAN3 | 10099  | tetraspanin 3 (TSPAN3), transcript variant 1, mRNA.                                         | 0.40  | 7.93 | 1.73E-64 | 6.08E-63 | blue |
| TTYH3  | 80727  | tweety homolog 3 (Drosophila) (TTYH3), mRNA.                                                | -0.17 | 6.30 | 1.75E-17 | 6.63E-17 | blue |
| TUBA1A | 7846   | tubulin, alpha 1a (TUBA1A), mRNA.                                                           | -0.06 | 7.62 | 9.79E-05 | 1.71E-04 | blue |
| TUBB   | 203068 | tubulin, beta (TUBB), mRNA.                                                                 | 0.32  | 8.81 | 1.22E-40 | 1.27E-39 | blue |
| TUBB6  | 84617  | tubulin, beta 6 (TUBB6), mRNA.                                                              | 0.18  | 8.54 | 1.08E-13 | 3.32E-13 | blue |
| TWSG1  | 57045  | twisted gastrulation homolog 1 (Drosophila) (TWSG1), mRNA.                                  | -0.07 | 6.33 | 3.81E-07 | 7.98E-07 | blue |
| TXNDC5 | 81567  | thioredoxin domain containing 5 (TXNDC5), transcript variant 1, mRNA.                       | 0.04  | 6.98 | 1.91E-02 | 2.63E-02 | blue |
| TYMP   | 1890   | endothelial cell growth factor 1 (platelet-derived) (ECGF1), mRNA.                          | 0.18  | 7.33 | 1.62E-18 | 6.44E-18 | blue |
| UBB    | 7314   | ubiquitin B (UBB), mRNA.                                                                    | -0.04 | 9.84 | 6.81E-03 | 9.88E-03 | blue |
| UBE2H  | 7328   | ubiquitin-conjugating enzyme E2H (UBC8 homolog, yeast) (UBE2H), transcript variant 1, mRNA. | 0.05  | 7.18 | 2.52E-03 | 3.81E-03 | blue |
| UBE2L6 | 9246   | ubiquitin-conjugating enzyme E2L 6 (UBE2L6), transcript variant 1, mRNA.                    | 0.14  | 6.46 | 1.98E-13 | 6.04E-13 | blue |
| UBE2O  | 63893  | ubiquitin-conjugating enzyme E2O (UBE2O), mRNA.                                             | 0.05  | 7.43 | 2.55E-04 | 4.28E-04 | blue |

|        |       |                                                                                            |       |       |          |          |      |
|--------|-------|--------------------------------------------------------------------------------------------|-------|-------|----------|----------|------|
| UBL7   | 84993 | ubiquitin-like 7 (bone marrow stromal cell-derived) (UBL7), transcript variant 1, mRNA.    | -0.67 | 7.44  | 9.30E-77 | 6.08E-75 | blue |
| UBP1   | 7342  | upstream binding protein 1 (LBP-1a) (UBP1), mRNA.                                          | -0.02 | 8.71  | 1.36E-01 | 1.66E-01 | blue |
| UBR4   | 23352 | zinc finger, UBR1 type 1 (ZUBR1), mRNA.                                                    | 0.16  | 8.36  | 5.95E-15 | 1.96E-14 | blue |
| UBXN6  | 80700 | UBX domain containing 1 (UBXD1), mRNA.                                                     | -0.30 | 10.17 | 9.76E-55 | 1.90E-53 | blue |
| UFM1   | 51569 | ubiquitin-fold modifier 1 (UFM1), mRNA.                                                    | 0.06  | 7.70  | 2.53E-03 | 3.84E-03 | blue |
| UPF2   | 26019 | UPF2 regulator of nonsense transcripts homolog (yeast) (UPF2), transcript variant 2, mRNA. | 0.08  | 7.40  | 3.94E-05 | 7.11E-05 | blue |
| USF1   | 7391  | upstream transcription factor 1 (USF1), transcript variant 2, mRNA.                        | 0.02  | 6.84  | 7.12E-02 | 9.11E-02 | blue |
| USP10  | 9100  | ubiquitin specific peptidase 10 (USP10), mRNA.                                             | -0.06 | 10.24 | 2.19E-08 | 4.98E-08 | blue |
| UTP14A | 10813 | UTP14, U3 small nucleolar ribonucleoprotein, homolog A (yeast) (UTP14A), mRNA.             | 0.15  | 8.84  | 1.05E-19 | 4.44E-19 | blue |
| VOPP1  | 81552 | EGFR-coamplified and overexpressed protein (ECOP), mRNA.                                   | 0.04  | 8.63  | 6.88E-04 | 1.11E-03 | blue |
| VPS25  | 84313 | vacuolar protein sorting 25 homolog (S. cerevisiae) (VPS25), mRNA.                         | -0.03 | 8.16  | 1.53E-02 | 2.13E-02 | blue |
| VWA9   | 81556 | chromosome 15 open reading frame 44 (C15orf44), mRNA.                                      | 0.01  | 9.46  | 3.33E-01 | 3.78E-01 | blue |

|        |        |                                                                                                               |       |       |          |          |      |
|--------|--------|---------------------------------------------------------------------------------------------------------------|-------|-------|----------|----------|------|
| WASH3P | 375690 | CXYorf1-related protein (FLJ00038), mRNA.                                                                     | 0.05  | 6.87  | 3.86E-05 | 6.98E-05 | blue |
| WDR1   | 9948   | WD repeat domain 1 (WDR1), transcript variant 1, mRNA.                                                        | 0.26  | 7.30  | 2.66E-28 | 1.64E-27 | blue |
| WDR74  | 54663  | WD repeat domain 74 (WDR74), mRNA.                                                                            | -0.02 | 5.51  | 2.18E-01 | 2.57E-01 | blue |
| WDR75  | 84128  | WD repeat domain 75 (WDR75), mRNA.                                                                            | -0.01 | 9.07  | 5.07E-01 | 5.52E-01 | blue |
| WNK1   | 65125  | WNK lysine deficient protein kinase 1 (WNK1), mRNA.                                                           | -0.05 | 6.56  | 1.17E-03 | 1.83E-03 | blue |
| WRAP73 | 49856  | WD repeat domain 8 (WDR8), mRNA.                                                                              | 0.07  | 9.11  | 4.14E-11 | 1.11E-10 | blue |
| WTAP   | 9589   | Wilms tumor 1 associated protein (WTAP), transcript variant 1, mRNA.                                          | 0.05  | 10.01 | 7.36E-06 | 1.41E-05 | blue |
| WTAP   | 646517 | PREDICTED: similar to Wilms tumour 1-associating protein (LOC646517), mRNA.                                   | -0.05 | 10.22 | 4.51E-04 | 7.41E-04 | blue |
| XPO6   | 23214  | exportin 6 (XPO6), mRNA.                                                                                      | -0.04 | 9.99  | 1.65E-03 | 2.55E-03 | blue |
| XRCC6  | 2547   | X-ray repair complementing defective repair in Chinese hamster cells 6 (Ku autoantigen, 70kDa) (XRCC6), mRNA. | 0.06  | 6.92  | 1.03E-04 | 1.79E-04 | blue |
| XRN2   | 22803  | 5'-3' exoribonuclease 2 (XRN2), mRNA.                                                                         | -0.09 | 6.82  | 5.59E-07 | 1.16E-06 | blue |
| YBX1   | 646531 | PREDICTED: similar to nuclease sensitive element binding protein 1 (LOC646531), mRNA.                         | -0.24 | 6.77  | 8.69E-36 | 7.23E-35 | blue |

|         |       |                                                                                                                               |       |      |          |          |      |
|---------|-------|-------------------------------------------------------------------------------------------------------------------------------|-------|------|----------|----------|------|
| YME1L1  | 10730 | YME1-like 1 ( <i>S. cerevisiae</i> ) (YME1L1), nuclear gene encoding mitochondrial protein, transcript variant 2, mRNA.       | -0.07 | 7.60 | 7.06E-06 | 1.36E-05 | blue |
| YWHAЕ   | 7531  | tyrosine 3-monooxygenase/tryptophan 5-monooxygenase activation protein, epsilon polypeptide (YWHAЕ), mRNA.                    | 0.01  | 7.41 | 6.77E-01 | 7.12E-01 | blue |
| YWHAZ   | 7534  | tyrosine 3-monooxygenase/tryptophan 5-monooxygenase activation protein, zeta polypeptide (YWHAZ), transcript variant 1, mRNA. | 0.28  | 7.30 | 5.31E-36 | 4.45E-35 | blue |
| ZAK     | 51776 | sterile alpha motif and leucine zipper containing kinase AZK (ZAK), transcript variant 1, mRNA.                               | -0.12 | 8.34 | 5.05E-15 | 1.67E-14 | blue |
| ZCCHC14 | 23174 | zinc finger, CCHC domain containing 14 (ZCCHC14), mRNA.                                                                       | -0.06 | 9.43 | 1.11E-04 | 1.93E-04 | blue |
| ZFAND6  | 54469 | zinc finger, AN1-type domain 6 (ZFAND6), mRNA.                                                                                | 0.03  | 6.20 | 8.09E-02 | 1.03E-01 | blue |
| ZHX1    | 11244 | zinc fingers and homeoboxes 1 (ZHX1), transcript variant 1, mRNA.                                                             | -0.09 | 8.70 | 2.16E-15 | 7.28E-15 | blue |
| ZMAT3   | 64393 | zinc finger, matrin type 3 (ZMAT3), transcript variant 2, mRNA.                                                               | -0.57 | 8.15 | 2.66E-73 | 1.41E-71 | blue |
| ZNF217  | 7764  | zinc finger protein 217 (ZNF217), mRNA.                                                                                       | -0.02 | 6.55 | 2.18E-01 | 2.58E-01 | blue |

|         |       |                                                                                                                    |       |       |          |          |       |
|---------|-------|--------------------------------------------------------------------------------------------------------------------|-------|-------|----------|----------|-------|
| ZSWIM8  | 23053 | KIAA0913 (KIAA0913), mRNA.                                                                                         | -0.20 | 7.24  | 1.09E-35 | 9.06E-35 | blue  |
| ZWILCH  | 55055 | Zwilch, kinetochore associated, homolog (Drosophila) (ZWILCH), transcript variant 1, mRNA.                         | 0.01  | 10.66 | 6.44E-01 | 6.83E-01 | blue  |
| SEPT2   | 4735  | septin 2 (SEPT2), transcript variant 3, mRNA.                                                                      | -0.06 | 9.14  | 5.09E-05 | 9.09E-05 | brown |
| SEPT9   | 10801 | septin 9 (SEPT9), mRNA.                                                                                            | 0.03  | 9.43  | 1.96E-02 | 2.70E-02 | brown |
| AARS2   | 57505 | alanyl-tRNA synthetase 2, mitochondrial (putative) (AARS2), mRNA.                                                  | -0.29 | 7.84  | 1.31E-29 | 8.37E-29 | brown |
| ABCB7   | 22    | ATP-binding cassette, sub-family B (MDR/TAP), member 7 (ABCB7), nuclear gene encoding mitochondrial protein, mRNA. | -0.11 | 9.25  | 2.52E-20 | 1.09E-19 | brown |
| ABCF1   | 23    | ATP-binding cassette, sub-family F (GCN20), member 1 (ABCF1), transcript variant 2, mRNA.                          | -0.06 | 8.95  | 8.81E-03 | 1.26E-02 | brown |
| ABHD14B | 84836 | abhydrolase domain containing 14B (ABHD14B), mRNA.                                                                 | 0.01  | 11.26 | 4.80E-01 | 5.26E-01 | brown |
| ABHD8   | 79575 | abhydrolase domain containing 8 (ABHD8), mRNA.                                                                     | -0.08 | 7.42  | 1.30E-10 | 3.38E-10 | brown |
| ABL1    | 25    | v-abl Abelson murine leukemia viral oncogene homolog 1 (ABL1), transcript variant b, mRNA.                         | -0.06 | 10.77 | 3.44E-10 | 8.73E-10 | brown |

|         |       |                                                                                                                                     |       |       |          |          |       |
|---------|-------|-------------------------------------------------------------------------------------------------------------------------------------|-------|-------|----------|----------|-------|
| ABR     | 29    | active BCR-related gene (ABR), transcript variant 1, mRNA.                                                                          | -0.18 | 11.70 | 1.70E-31 | 1.17E-30 | brown |
| ACAD9   | 28976 | acyl-Coenzyme A dehydrogenase family, member 9 (ACAD9), mRNA.                                                                       | -0.04 | 9.37  | 5.10E-02 | 6.64E-02 | brown |
| ACOT13  | 55856 | thioesterase superfamily member 2 (THEM2), mRNA.                                                                                    | -0.01 | 10.81 | 3.69E-01 | 4.15E-01 | brown |
| ACSL5   | 51703 | acyl-CoA synthetase long-chain family member 5 (ACSL5), transcript variant 1, mRNA.                                                 | -0.09 | 9.43  | 1.27E-12 | 3.71E-12 | brown |
| ACTR1A  | 10121 | ARP1 actin-related protein 1 homolog A, centractin alpha (yeast) (ACTR1A), mRNA.                                                    | -0.02 | 10.04 | 2.62E-01 | 3.04E-01 | brown |
| ADCY3   | 109   | adenylate cyclase 3 (ADCY3), mRNA.                                                                                                  | -0.14 | 9.26  | 1.76E-27 | 1.05E-26 | brown |
| AES     | 166   | amino-terminal enhancer of split (AES), transcript variant 2, mRNA.                                                                 | 0.12  | 7.15  | 1.90E-10 | 4.91E-10 | brown |
| AGO2    | 27161 | eukaryotic translation initiation factor 2C, 2 (EIF2C2), mRNA.                                                                      | -0.13 | 6.77  | 2.84E-16 | 1.01E-15 | brown |
| AIMP2   | 7965  | JTV1 gene (JTV1), mRNA.                                                                                                             | 0.20  | 7.58  | 2.66E-31 | 1.82E-30 | brown |
| ALDH4A1 | 8659  | aldehyde dehydrogenase 4 family, member A1 (ALDH4A1), nuclear gene encoding mitochondrial protein, transcript variant P5CDhL, mRNA. | 0.42  | 7.32  | 7.77E-61 | 2.23E-59 | brown |

|         |        |                                                                                                                 |       |       |          |          |       |
|---------|--------|-----------------------------------------------------------------------------------------------------------------|-------|-------|----------|----------|-------|
| ALKBH3  | 221120 | alkB, alkylation repair homolog 3 (E. coli) (ALKBH3), mRNA.                                                     | 0.11  | 6.36  | 1.97E-13 | 6.02E-13 | brown |
| ALKBH5  | 54890  | alkB, alkylation repair homolog 5 (E. coli) (ALKBH5), mRNA.                                                     | 0.29  | 7.36  | 3.40E-58 | 8.33E-57 | brown |
| AP1B1   | 162    | adaptor-related protein complex 1, beta 1 subunit (AP1B1), transcript variant 1, mRNA.                          | 0.03  | 8.95  | 1.10E-01 | 1.36E-01 | brown |
| AP1M1   | 8907   | adaptor-related protein complex 1, mu 1 subunit (AP1M1), mRNA.                                                  | 0.05  | 9.35  | 1.51E-03 | 2.35E-03 | brown |
| AP4B1   | 10717  | adaptor-related protein complex 4, beta 1 subunit (AP4B1), mRNA.                                                | 0.24  | 8.00  | 6.27E-36 | 5.24E-35 | brown |
| APBA3   | 9546   | amyloid beta (A4) precursor protein-binding, family A, member 3 (X11-like 2) (APBA3), mRNA.                     | -0.26 | 9.80  | 4.72E-21 | 2.11E-20 | brown |
| APBB3   | 10307  | amyloid beta (A4) precursor protein-binding, family B, member 3 (APBB3), transcript variant 4, mRNA.            | -0.06 | 11.86 | 5.84E-05 | 1.04E-04 | brown |
| APEX2   | 27301  | APEX nuclease (apurinic/aprimidinic endonuclease) 2 (APEX2), nuclear gene encoding mitochondrial protein, mRNA. | 0.66  | 8.71  | 1.43E-83 | 1.61E-81 | brown |
| ARF4    | 378    | ADP-ribosylation factor 4 (ARF4), mRNA.                                                                         | -0.11 | 5.95  | 9.58E-09 | 2.23E-08 | brown |
| ARFGAP2 | 84364  | zinc finger protein 289, ID1 regulated (ZNF289), mRNA.                                                          | 0.03  | 6.02  | 2.03E-02 | 2.78E-02 | brown |

|          |        |                                                                                                                                                                  |       |      |          |          |       |
|----------|--------|------------------------------------------------------------------------------------------------------------------------------------------------------------------|-------|------|----------|----------|-------|
| ARHGAP17 | 55114  | Rho GTPase activating protein 17 (ARHGAP17), transcript variant 1, mRNA.                                                                                         | 0.09  | 7.74 | 6.26E-09 | 1.48E-08 | brown |
| ARHGAP33 | 115703 | sorting nexin 26 (SNX26), mRNA.                                                                                                                                  | -0.24 | 5.83 | 4.99E-26 | 2.82E-25 | brown |
| ARID3B   | 10620  | AT rich interactive domain 3B (BRIGHT-like) (ARID3B), mRNA.                                                                                                      | 0.14  | 6.85 | 1.06E-15 | 3.65E-15 | brown |
| ARIH2    | 10425  | ariadne homolog 2 (Drosophila) (ARIH2), mRNA.                                                                                                                    | 0.02  | 9.24 | 2.71E-01 | 3.13E-01 | brown |
| ASCC2    | 84164  | activating signal cointegrator 1 complex subunit 2 (ASCC2), mRNA.                                                                                                | -0.14 | 9.39 | 8.58E-25 | 4.62E-24 | brown |
| ATG7     | 10533  | ATG7 autophagy related 7 homolog (S. cerevisiae) (ATG7), mRNA.                                                                                                   | -0.02 | 7.81 | 2.34E-01 | 2.74E-01 | brown |
| ATP5H    | 10476  | ATP synthase, H <sup>+</sup> transporting, mitochondrial F0 complex, subunit d (ATP5H), nuclear gene encoding mitochondrial protein, transcript variant 1, mRNA. | 0.36  | 6.86 | 8.81E-40 | 8.72E-39 | brown |
| ATP6AP1  | 537    | ATPase, H <sup>+</sup> transporting, lysosomal accessory protein 1 (ATP6AP1), mRNA.                                                                              | -0.09 | 8.91 | 1.67E-15 | 5.65E-15 | brown |
| ATP6V1E1 | 529    | ATPase, H <sup>+</sup> transporting, lysosomal 31kDa, V1 subunit E1 (ATP6V1E1), transcript variant 1, mRNA.                                                      | -0.01 | 7.90 | 4.05E-01 | 4.50E-01 | brown |
| ATXN2    | 6311   | ataxin 2 (ATXN2), mRNA.                                                                                                                                          | 0.05  | 8.49 | 1.25E-04 | 2.15E-04 | brown |



|           |        |                                                              |       |       |           |           |       |
|-----------|--------|--------------------------------------------------------------|-------|-------|-----------|-----------|-------|
| BFAR      | 51283  | bifunctional apoptosis regulator (BFAR), mRNA.               | 0.00  | 7.67  | 9.45E-01  | 9.53E-01  | brown |
| BMS1      | 9790   | BMS1-like, ribosome assembly protein (yeast) (BMS1L), mRNA.  | 0.03  | 6.65  | 3.28E-02  | 4.37E-02  | brown |
| BRAT1     | 221927 | chromosome 7 open reading frame 27 (C7orf27), mRNA.          | 0.01  | 8.98  | 5.94E-01  | 6.36E-01  | brown |
| BRD2      | 6046   | bromodomain containing 2 (BRD2), mRNA.                       | 0.04  | 11.82 | 3.13E-03  | 4.70E-03  | brown |
| BRD9      | 65980  | bromodomain containing 9 (BRD9), transcript variant 1, mRNA. | 0.89  | 6.83  | 2.03E-103 | 9.36E-101 | brown |
| BRI3      | 25798  | brain protein I3 (BRI3), mRNA.                               | 0.03  | 8.57  | 1.06E-01  | 1.32E-01  | brown |
| BUD31     | 8896   | BUD31 homolog (S. cerevisiae) (BUD31), mRNA.                 | -0.10 | 7.20  | 3.34E-11  | 8.96E-11  | brown |
| C14orf166 | 51637  | chromosome 14 open reading frame 166 (C14orf166), mRNA.      | 0.14  | 8.57  | 8.82E-16  | 3.05E-15  | brown |
| C14orf80  | 283643 | chromosome 14 open reading frame 80 (C14orf80), mRNA.        | 0.63  | 7.66  | 4.84E-77  | 3.27E-75  | brown |
| C16orf59  | 80178  | chromosome 16 open reading frame 59 (C16orf59), mRNA.        | -0.57 | 8.62  | 4.23E-60  | 1.17E-58  | brown |
| C17orf70  | 80233  | chromosome 17 open reading frame 70 (C17orf70), mRNA.        | -0.11 | 7.16  | 7.40E-11  | 1.96E-10  | brown |
| C1orf112  | 55732  | chromosome 1 open reading frame 112 (C1orf112), mRNA.        | 0.06  | 6.82  | 5.12E-07  | 1.06E-06  | brown |
| C1orf86   | 199990 | chromosome 1 open reading frame 86 (C1orf86), mRNA.          | 0.07  | 12.20 | 3.82E-07  | 8.00E-07  | brown |

|         |       |                                                                                                                    |       |      |           |           |       |
|---------|-------|--------------------------------------------------------------------------------------------------------------------|-------|------|-----------|-----------|-------|
| C1QBP   | 708   | complement component 1, q subcomponent binding protein (C1QBP), nuclear gene encoding mitochondrial protein, mRNA. | 0.37  | 8.02 | 3.16E-36  | 2.70E-35  | brown |
| C2CD2   | 25966 | chromosome 21 open reading frame 25 (C21orf25), transcript variant 1, mRNA.                                        | -0.65 | 8.28 | 2.42E-83  | 2.67E-81  | brown |
| C4orf27 | 54969 | chromosome 4 open reading frame 27 (C4orf27), mRNA.                                                                | -0.17 | 8.41 | 4.38E-15  | 1.45E-14  | brown |
| CARD11  | 84433 | caspase recruitment domain family, member 11 (CARD11), mRNA.                                                       | 0.07  | 8.64 | 3.13E-08  | 7.03E-08  | brown |
| CASZ1   | 54897 | castor zinc finger 1 (CASZ1), transcript variant 2, mRNA.                                                          | 0.42  | 7.38 | 6.73E-66  | 2.48E-64  | brown |
| CBFA2T3 | 863   | core-binding factor, runt domain, alpha subunit 2; translocated to, 3 (CBFA2T3), transcript variant 1, mRNA.       | 0.03  | 7.26 | 5.10E-02  | 6.64E-02  | brown |
| CCDC130 | 81576 | coiled-coil domain containing 130 (CCDC130), mRNA.                                                                 | 0.04  | 7.70 | 2.79E-03  | 4.20E-03  | brown |
| CCNI    | 10983 | cyclin I (CCNI), mRNA.                                                                                             | 0.16  | 6.57 | 8.06E-18  | 3.10E-17  | brown |
| CD69    | 969   | CD69 molecule (CD69), mRNA.                                                                                        | 1.14  | 7.93 | 1.87E-109 | 1.36E-106 | brown |
| CDC16   | 8881  | cell division cycle 16 homolog (S. cerevisiae) (CDC16), transcript variant 1, mRNA.                                | 0.08  | 6.03 | 4.80E-07  | 9.98E-07  | brown |
| CDC20   | 991   | cell division cycle 20 homolog (S. cerevisiae) (CDC20), mRNA.                                                      | 0.54  | 5.74 | 3.60E-44  | 4.39E-43  | brown |

|          |        |                                                                                      |       |      |          |          |       |
|----------|--------|--------------------------------------------------------------------------------------|-------|------|----------|----------|-------|
| CDC37    | 11140  | cell division cycle 37 homolog (S. cerevisiae) (CDC37), mRNA.                        | -0.21 | 7.07 | 8.16E-37 | 7.16E-36 | brown |
| CDCA7    | 83879  | cell division cycle associated 7 (CDCA7), transcript variant 2, mRNA.                | -0.11 | 8.20 | 1.87E-05 | 3.48E-05 | brown |
| CDK5RAP2 | 55755  | CDK5 regulatory subunit associated protein 2 (CDK5RAP2), transcript variant 1, mRNA. | -0.54 | 6.44 | 4.33E-62 | 1.33E-60 | brown |
| CECR5    | 27440  | cat eye syndrome chromosome region, candidate 5 (CECR5), transcript variant 2, mRNA. | 0.50  | 7.47 | 5.45E-69 | 2.34E-67 | brown |
| CEP131   | 22994  | 5-azacytidine induced 1 (AZI1), transcript variant 2, mRNA.                          | -0.05 | 8.28 | 2.28E-04 | 3.84E-04 | brown |
| CEP85    | 64793  | coiled-coil domain containing 21 (CCDC21), mRNA.                                     | 0.00  | 6.24 | 8.77E-01 | 8.96E-01 | brown |
| CHAF1B   | 8208   | chromatin assembly factor 1, subunit B (p60) (CHAF1B), mRNA.                         | -0.20 | 6.40 | 2.03E-30 | 1.33E-29 | brown |
| CHCHD10  | 400916 | chromosome 22 open reading frame 16 (C22orf16), mRNA.                                | -0.08 | 9.89 | 4.74E-05 | 8.48E-05 | brown |
| CHCHD4   | 131474 | coiled-coil-helix-coiled-coil-helix domain containing 4 (CHCHD4), mRNA.              | 0.00  | 6.13 | 9.19E-01 | 9.32E-01 | brown |
| CHP1     | 11261  | calcium binding protein P22 (CHP), mRNA.                                             | -0.02 | 9.56 | 8.82E-02 | 1.11E-01 | brown |
| CKAP2L   | 150468 | cytoskeleton associated protein 2-like (CKAP2L), mRNA.                               | -0.04 | 9.11 | 9.09E-04 | 1.45E-03 | brown |
| CLCN7    | 1186   | chloride channel 7 (CLCN7), mRNA.                                                    | 0.11  | 6.35 | 1.30E-16 | 4.72E-16 | brown |

|         |        |                                                                                                                    |       |       |          |          |       |
|---------|--------|--------------------------------------------------------------------------------------------------------------------|-------|-------|----------|----------|-------|
| CLEC16A | 23274  | KIAA0350 (KIAA0350), mRNA.                                                                                         | -0.11 | 6.03  | 1.39E-04 | 2.38E-04 | brown |
| CMC4    | 4515   | mature T-cell proliferation 1 (MTCPI), nuclear gene encoding mitochondrial protein, transcript variant B1, mRNA.   | 0.00  | 7.36  | 9.31E-01 | 9.42E-01 | brown |
| CNOT11  | 55571  | chromosome 2 open reading frame 29 (C2orf29), mRNA.                                                                | -0.07 | 10.36 | 1.52E-11 | 4.17E-11 | brown |
| COA5    | 493753 | hypothetical protein MGC52110 (MGC52110), mRNA.                                                                    | -0.22 | 6.02  | 1.07E-22 | 5.19E-22 | brown |
| COMMD8  | 54951  | COMM domain containing 8 (COMMD8), mRNA.                                                                           | 0.04  | 10.44 | 1.11E-02 | 1.57E-02 | brown |
| COMT    | 1312   | catechol-O-methyltransferase (COMT), transcript variant S-COMT, mRNA.                                              | 0.09  | 7.39  | 1.53E-06 | 3.09E-06 | brown |
| COX7A2L | 9167   | cytochrome c oxidase subunit VIIa polypeptide 2 like (COX7A2L), nuclear gene encoding mitochondrial protein, mRNA. | -0.09 | 7.90  | 4.45E-07 | 9.28E-07 | brown |
| CPSF1   | 29894  | cleavage and polyadenylation specific factor 1, 160kDa (CPSF1), mRNA.                                              | 0.53  | 10.11 | 3.54E-71 | 1.66E-69 | brown |
| CSNK2A1 | 1457   | casein kinase 2, alpha 1 polypeptide (CSNK2A1), transcript variant 3, mRNA.                                        | 0.08  | 7.09  | 6.06E-04 | 9.82E-04 | brown |

|         |       |                                                                                                     |       |      |          |          |       |
|---------|-------|-----------------------------------------------------------------------------------------------------|-------|------|----------|----------|-------|
| CTDSP2  | 10106 | CTD (carboxy-terminal domain, RNA polymerase II, polypeptide A) small phosphatase 2 (CTDSP2), mRNA. | -0.13 | 8.37 | 2.31E-17 | 8.70E-17 | brown |
| CTNS    | 1497  | cystinosis, nephropathic (CTNS), transcript variant 1, mRNA.                                        | 0.01  | 8.65 | 6.86E-01 | 7.21E-01 | brown |
| CTSD    | 1509  | cathepsin D (CTSD), mRNA.                                                                           | -0.09 | 9.75 | 5.95E-10 | 1.49E-09 | brown |
| CXXC1   | 30827 | CXXC finger 1 (PHD domain) (CXXC1), mRNA.                                                           | 0.16  | 5.92 | 2.29E-18 | 9.01E-18 | brown |
| CYFIP2  | 26999 | cytoplasmic FMR1 interacting protein 2 (CYFIP2), transcript variant 3, mRNA.                        | 0.25  | 7.48 | 3.66E-27 | 2.17E-26 | brown |
| DAP     | 1611  | death-associated protein (DAP), mRNA.                                                               | -0.13 | 8.68 | 9.93E-10 | 2.45E-09 | brown |
| DBNL    | 28988 | drebrin-like (DBNL), transcript variant 2, mRNA.                                                    | 0.10  | 6.76 | 3.08E-15 | 1.03E-14 | brown |
| DDX27   | 55661 | DEAD (Asp-Glu-Ala-Asp) box polypeptide 27 (DDX27), mRNA.                                            | -0.05 | 6.51 | 4.08E-03 | 6.06E-03 | brown |
| DDX46   | 9879  | DEAD (Asp-Glu-Ala-Asp) box polypeptide 46 (DDX46), mRNA.                                            | 0.08  | 8.75 | 3.95E-07 | 8.27E-07 | brown |
| DENND1A | 57706 | DENN/MADD domain containing 1A (DENND1A), transcript variant 2, mRNA.                               | 0.07  | 5.89 | 4.66E-07 | 9.71E-07 | brown |
| DMAP1   | 55929 | DNA methyltransferase 1 associated protein 1 (DMAP1), transcript variant 1, mRNA.                   | -0.03 | 7.43 | 4.20E-02 | 5.53E-02 | brown |

|        |       |                                                                             |       |      |          |          |       |
|--------|-------|-----------------------------------------------------------------------------|-------|------|----------|----------|-------|
| DNAAF5 | 54919 | HEAT repeat containing 2 (HEATR2), mRNA.<br>XM_935824 XM_935825             | -0.09 | 7.88 | 3.26E-12 | 9.28E-12 | brown |
| DNAJC8 | 22826 | DnaJ (Hsp40) homolog, subfamily C, member 8 (DNAJC8), mRNA.                 | -0.14 | 8.14 | 2.87E-15 | 9.62E-15 | brown |
| DNMT1  | 1786  | DNA (cytosine-5-)-methyltransferase 1 (DNMT1), mRNA.                        | -0.04 | 7.45 | 4.08E-03 | 6.05E-03 | brown |
| DOCK2  | 1794  | dedicator of cytokinesis 2 (DOCK2), mRNA.                                   | -0.02 | 5.99 | 4.40E-01 | 4.86E-01 | brown |
| DPYD   | 1806  | dihydropyrimidine dehydrogenase (DPYD), mRNA.                               | 0.02  | 9.68 | 3.36E-01 | 3.81E-01 | brown |
| DRAP1  | 10589 | DR1-associated protein 1 (negative cofactor 2 alpha) (DRAP1), mRNA.         | 0.08  | 9.03 | 4.56E-06 | 8.89E-06 | brown |
| DUS2   | 54920 | dihydrouridine synthase 2-like, SMM1 homolog (S. cerevisiae) (DUS2L), mRNA. | 0.00  | 7.91 | 8.53E-01 | 8.75E-01 | brown |
| DYNLT3 | 6990  | dynein, light chain, Tctex-type 3 (DYNLT3), mRNA.                           | 0.24  | 7.91 | 1.28E-23 | 6.47E-23 | brown |
| E2F1   | 1869  | E2F transcription factor 1 (E2F1), mRNA.                                    | 0.01  | 8.37 | 4.63E-01 | 5.09E-01 | brown |
| E2F4   | 1874  | E2F transcription factor 4, p107/p130-binding (E2F4), mRNA.                 | -0.05 | 6.72 | 5.96E-03 | 8.70E-03 | brown |
| E4F1   | 1877  | E4F transcription factor 1 (E4F1), mRNA.                                    | -0.08 | 9.01 | 1.44E-08 | 3.32E-08 | brown |
| ECHDC2 | 55268 | enoyl Coenzyme A hydratase domain containing 2 (ECHDC2), mRNA.              | -0.25 | 9.80 | 4.54E-33 | 3.34E-32 | brown |
| EDC4   | 23644 | enhancer of mRNA decapping 4 (EDC4), mRNA.                                  | -0.23 | 9.39 | 2.40E-41 | 2.55E-40 | brown |

|         |        |                                                                                       |       |      |          |          |       |
|---------|--------|---------------------------------------------------------------------------------------|-------|------|----------|----------|-------|
| EI24    | 9538   | etoposide induced 2.4 mRNA (EI24), transcript variant 2, mRNA.                        | 0.28  | 9.31 | 7.69E-36 | 6.41E-35 | brown |
| EIF2AK1 | 27102  | eukaryotic translation initiation factor 2-alpha kinase 1 (EIF2AK1), mRNA.            | -0.12 | 8.01 | 2.29E-14 | 7.32E-14 | brown |
| EIF2B2  | 8892   | eukaryotic translation initiation factor 2B, subunit 2 beta, 39kDa (EIF2B2), mRNA.    | 0.12  | 8.75 | 2.78E-10 | 7.10E-10 | brown |
| EIF2B5  | 8893   | eukaryotic translation initiation factor 2B, subunit 5 epsilon, 82kDa (EIF2B5), mRNA. | 0.20  | 6.53 | 7.05E-20 | 2.99E-19 | brown |
| EIF4G3  | 8672   | eukaryotic translation initiation factor 4 gamma, 3 (EIF4G3), mRNA.                   | 0.03  | 5.51 | 5.20E-02 | 6.76E-02 | brown |
| EML3    | 256364 | echinoderm microtubule associated protein like 3 (EML3), mRNA.                        | -0.04 | 7.22 | 3.23E-02 | 4.30E-02 | brown |
| ENO3    | 2027   | enolase 3 (beta, muscle) (ENO3), transcript variant 2, mRNA.                          | 0.27  | 6.55 | 5.67E-26 | 3.19E-25 | brown |
| EVI5L   | 115704 | ecotropic viral integration site 5-like (EVI5L), mRNA.                                | -0.05 | 9.95 | 3.17E-04 | 5.28E-04 | brown |
| EXOSC10 | 5394   | exosome component 10 (EXOSC10), transcript variant 1, mRNA.                           | -0.28 | 7.23 | 3.47E-34 | 2.67E-33 | brown |
| FAF2    | 23197  | UBX domain containing 8 (UBXD8), mRNA.                                                | -0.30 | 7.17 | 1.75E-34 | 1.37E-33 | brown |
| FAM120A | 23196  | family with sequence similarity 120A (FAM120A), mRNA.                                 | 0.07  | 7.13 | 2.09E-08 | 4.75E-08 | brown |

|         |       |                                                                                                       |       |       |          |          |       |
|---------|-------|-------------------------------------------------------------------------------------------------------|-------|-------|----------|----------|-------|
| FAM136A | 84908 | hypothetical protein FLJ14668 (FLJ14668), mRNA.                                                       | 0.54  | 8.11  | 9.06E-66 | 3.29E-64 | brown |
| FAM53C  | 51307 | family with sequence similarity 53, member C (FAM53C), mRNA.                                          | 0.05  | 11.21 | 1.31E-04 | 2.25E-04 | brown |
| FAM96A  | 84191 | family with sequence similarity 96, member A (FAM96A), transcript variant 1, mRNA.                    | -0.04 | 5.93  | 6.36E-03 | 9.26E-03 | brown |
| FAN1    | 54893 | myotubularin related protein 10 (MTMR10), mRNA.                                                       | 0.03  | 11.41 | 8.04E-02 | 1.02E-01 | brown |
| FBXO18  | 84893 | F-box protein, helicase, 18 (FBXO18), transcript variant 1, mRNA.                                     | 0.07  | 7.24  | 1.29E-06 | 2.62E-06 | brown |
| FDXR    | 2232  | ferredoxin reductase (FDXR), nuclear gene encoding mitochondrial protein, transcript variant 1, mRNA. | -0.01 | 9.42  | 4.35E-01 | 4.82E-01 | brown |
| FEM1A   | 55527 | fem-1 homolog a (C. elegans) (FEM1A), mRNA.                                                           | 0.10  | 7.56  | 1.25E-08 | 2.89E-08 | brown |
| FGD3    | 89846 | FYVE, RhoGEF and PH domain containing 3 (FGD3), mRNA.                                                 | -0.03 | 9.27  | 3.23E-02 | 4.31E-02 | brown |
| FKBP1A  | 2280  | FK506 binding protein 1A, 12kDa (FKBP1A), transcript variant 12B, mRNA.                               | -0.23 | 5.62  | 1.70E-22 | 8.13E-22 | brown |
| FKBP3   | 2287  | FK506 binding protein 3, 25kDa (FKBP3), mRNA.                                                         | 0.49  | 8.18  | 5.59E-69 | 2.38E-67 | brown |
| FKBP4   | 2288  | FK506 binding protein 4, 59kDa (FKBP4), mRNA.                                                         | 0.02  | 10.78 | 1.12E-01 | 1.39E-01 | brown |



|         |        |                                                                                                                   |       |       |          |          |       |
|---------|--------|-------------------------------------------------------------------------------------------------------------------|-------|-------|----------|----------|-------|
| FLAD1   | 80308  | FAD1 flavin adenine dinucleotide synthetase homolog ( <i>S. cerevisiae</i> ) (FLAD1), transcript variant 2, mRNA. | -0.34 | 6.13  | 1.73E-43 | 2.05E-42 | brown |
| FOXJ2   | 55810  | forkhead box J2 (FOXJ2), mRNA.                                                                                    | -0.07 | 5.99  | 2.62E-06 | 5.18E-06 | brown |
| FRMD8   | 83786  | FKSG44 gene (FKSG44), mRNA.                                                                                       | 0.03  | 8.78  | 1.00E-01 | 1.26E-01 | brown |
| FUK     | 197258 | fucokinase (FUK), mRNA.                                                                                           | -0.10 | 11.07 | 5.78E-13 | 1.72E-12 | brown |
| GAK     | 2580   | cyclin G associated kinase (GAK), mRNA. XM_943600 XM_943603                                                       | 0.00  | 6.75  | 9.15E-01 | 9.29E-01 | brown |
| GATAD2A | 54815  | GATA zinc finger domain containing 2A (GATAD2A), mRNA.                                                            | -0.22 | 7.70  | 6.77E-31 | 4.52E-30 | brown |
| GATAD2B | 57459  | GATA zinc finger domain containing 2B (GATAD2B), mRNA.                                                            | -0.04 | 8.13  | 1.28E-02 | 1.80E-02 | brown |
| GATB    | 5188   | PET112-like (yeast) (PET112L), mRNA.                                                                              | 0.04  | 7.81  | 1.15E-03 | 1.81E-03 | brown |
| GCN1L1  | 10985  | GCN1 general control of amino-acid synthesis 1-like 1 (yeast) (GCN1L1), mRNA.                                     | 0.08  | 7.27  | 6.68E-06 | 1.28E-05 | brown |
| GEMIN2  | 8487   | survival of motor neuron protein interacting protein 1 (SIP1), transcript variant beta, mRNA.                     | -0.08 | 11.32 | 4.47E-06 | 8.72E-06 | brown |
| GEMIN4  | 50628  | gem (nuclear organelle) associated protein 4 (GEMIN4), mRNA.                                                      | 0.04  | 7.01  | 2.45E-02 | 3.32E-02 | brown |

|         |       |                                                                                       |       |      |          |          |       |
|---------|-------|---------------------------------------------------------------------------------------|-------|------|----------|----------|-------|
| GGH     | 8836  | gamma-glutamyl hydrolase (conjugase, folylpolyglutamyglutamyl hydrolase) (GGH), mRNA. | -0.14 | 9.87 | 1.09E-23 | 5.54E-23 | brown |
| GLRX    | 2745  | glutaredoxin (thioltransferase) (GLRX), mRNA.                                         | 0.06  | 9.24 | 1.94E-05 | 3.60E-05 | brown |
| GNG5    | 2787  | guanine nucleotide binding protein (G protein), gamma 5 (GNG5), mRNA.                 | -0.09 | 6.73 | 7.28E-14 | 2.27E-13 | brown |
| GNL1    | 2794  | guanine nucleotide binding protein-like 1 (GNL1), mRNA.                               | -0.03 | 6.52 | 2.09E-01 | 2.47E-01 | brown |
| GPHN    | 10243 | gephyrin (GPHN), transcript variant 2, mRNA.                                          | 0.23  | 6.96 | 9.40E-27 | 5.46E-26 | brown |
| GPI     | 2821  | glucose phosphate isomerase (GPI), mRNA.                                              | 0.49  | 7.97 | 4.90E-72 | 2.41E-70 | brown |
| GPR137  | 56834 | G protein-coupled receptor 137 (GPR137), mRNA.                                        | -0.01 | 6.47 | 5.84E-01 | 6.27E-01 | brown |
| GPS1    | 2873  | G protein pathway suppressor 1 (GPS1), transcript variant 1, mRNA.                    | 0.01  | 9.84 | 3.43E-01 | 3.88E-01 | brown |
| GPSM3   | 63940 | G-protein signalling modulator 3 (AGS3-like, C. elegans) (GPSM3), mRNA.               | 0.46  | 8.56 | 2.92E-45 | 3.78E-44 | brown |
| GRAMD1A | 57655 | GRAM domain containing 1A (GRAMD1A), mRNA.                                            | 0.06  | 8.32 | 1.85E-05 | 3.46E-05 | brown |
| GTPBP6  | 8225  | GTP binding protein 6 (putative) (GTPBP6), mRNA.                                      | -0.02 | 7.88 | 5.44E-02 | 7.05E-02 | brown |
| GUCD1   | 83606 | chromosome 22 open reading frame 13 (C22orf13), mRNA.                                 | -0.05 | 7.02 | 9.35E-03 | 1.34E-02 | brown |

|         |       |                                                                                                                                                                                                   |       |       |          |          |       |
|---------|-------|---------------------------------------------------------------------------------------------------------------------------------------------------------------------------------------------------|-------|-------|----------|----------|-------|
| HADHA   | 3030  | hydroxyacyl-Coenzyme A dehydrogenase/3-ketoacyl-Coenzyme A thiolase/enoyl-Coenzyme A hydratase (trifunctional protein), alpha subunit (HADHA), nuclear gene encoding mitochondrial protein, mRNA. | 0.07  | 11.49 | 1.48E-10 | 3.83E-10 | brown |
| HARS    | 3035  | histidyl-tRNA synthetase (HARS), mRNA.                                                                                                                                                            | -0.04 | 7.66  | 8.20E-03 | 1.18E-02 | brown |
| HCFC1   | 3054  | host cell factor C1 (VP16-accessory protein) (HCFC1), mRNA.                                                                                                                                       | 0.06  | 11.70 | 3.98E-06 | 7.79E-06 | brown |
| HDAC1   | 3065  | histone deacetylase 1 (HDAC1), mRNA.                                                                                                                                                              | -0.08 | 9.52  | 4.93E-07 | 1.02E-06 | brown |
| HGS     | 9146  | hepatocyte growth factor-regulated tyrosine kinase substrate (HGS), mRNA.                                                                                                                         | -0.10 | 7.86  | 1.38E-09 | 3.37E-09 | brown |
| HIRIP3  | 8479  | HIRA interacting protein 3 (HIRIP3), mRNA.                                                                                                                                                        | -0.24 | 7.49  | 1.11E-26 | 6.44E-26 | brown |
| HMHA1   | 23526 | histocompatibility (minor) HA-1 (HMHA1), mRNA.                                                                                                                                                    | 0.00  | 5.98  | 8.49E-01 | 8.71E-01 | brown |
| HNRNPDL | 9987  | heterogeneous nuclear ribonucleoprotein D-like (HNRPDL), transcript variant 3, transcribed RNA.                                                                                                   | -0.48 | 10.81 | 1.15E-77 | 8.31E-76 | brown |
| HSBP1   | 3281  | heat shock factor binding protein 1 (HSBP1), mRNA.                                                                                                                                                | 0.29  | 7.21  | 2.20E-38 | 2.08E-37 | brown |
| IGBP1   | 3476  | immunoglobulin (CD79A) binding protein 1 (IGBP1), mRNA.                                                                                                                                           | -0.10 | 7.19  | 3.16E-09 | 7.60E-09 | brown |

|          |        |                                                                               |       |      |          |          |       |
|----------|--------|-------------------------------------------------------------------------------|-------|------|----------|----------|-------|
| IGF2R    | 3482   | insulin-like growth factor 2 receptor (IGF2R), mRNA.                          | -0.01 | 6.22 | 6.79E-01 | 7.14E-01 | brown |
| INO80E   | 283899 | coiled-coil domain containing 95 (CCDC95), mRNA.                              | 0.10  | 8.09 | 1.05E-07 | 2.30E-07 | brown |
| INPPL1   | 3636   | inositol polyphosphate phosphatase-like 1 (INPPL1), mRNA.                     | -0.08 | 9.20 | 7.93E-07 | 1.63E-06 | brown |
| INTS6    | 26512  | integrator complex subunit 6 (INTS6), transcript variant 1, mRNA.             | 0.62  | 8.62 | 2.68E-64 | 9.33E-63 | brown |
| INTS9    | 55756  | integrator complex subunit 9 (RC74), mRNA.                                    | 0.04  | 6.45 | 6.50E-02 | 8.36E-02 | brown |
| IPO11    | 51194  | importin 11 (IPO11), mRNA.                                                    | -0.17 | 9.65 | 1.02E-21 | 4.72E-21 | brown |
| ITGB1BP1 | 9270   | integrin beta 1 binding protein 1 (ITGB1BP1), transcript variant 2, mRNA.     | -0.23 | 7.38 | 2.31E-41 | 2.46E-40 | brown |
| ITPR3    | 3710   | inositol 1,4,5-triphosphate receptor, type 3 (ITPR3), mRNA.                   | 0.00  | 5.86 | 9.82E-01 | 9.85E-01 | brown |
| JADE1    | 79960  | PHD finger protein 17 (PHF17), transcript variant S, mRNA.                    | -0.07 | 8.16 | 1.21E-05 | 2.29E-05 | brown |
| JMJD8    | 339123 | hypothetical LOC339123 (LOC339123), mRNA.                                     | -0.18 | 7.40 | 4.05E-20 | 1.75E-19 | brown |
| KANSL2   | 54934  | chromosome 12 open reading frame 41 (C12orf41), mRNA.                         | -0.08 | 9.91 | 2.73E-10 | 7.00E-10 | brown |
| KAT2A    | 2648   | GCN5 general control of amino-acid synthesis 5-like 2 (yeast) (GCN5L2), mRNA. | 0.02  | 8.66 | 1.14E-01 | 1.42E-01 | brown |

|          |       |                                                                                          |       |       |          |          |       |
|----------|-------|------------------------------------------------------------------------------------------|-------|-------|----------|----------|-------|
| KDEL2    | 11014 | KDEL (Lys-Asp-Glu-Leu) endoplasmic reticulum protein retention receptor 2 (KDEL2), mRNA. | -0.06 | 9.18  | 9.82E-08 | 2.14E-07 | brown |
| KDM5A    | 5927  | Jumonji, AT rich interactive domain 1A (RBBP2-like) (JARID1A), mRNA.                     | 0.02  | 7.91  | 1.72E-01 | 2.07E-01 | brown |
| KHSRP    | 8570  | KH-type splicing regulatory protein (FUSE binding protein 2) (KHSRP), mRNA.              | -0.16 | 8.96  | 1.24E-30 | 8.18E-30 | brown |
| KIAA0195 | 9772  | KIAA0195 (KIAA0195), mRNA.                                                               | 0.47  | 6.23  | 3.76E-36 | 3.17E-35 | brown |
| KIAA0391 | 9692  | KIAA0391 (KIAA0391), mRNA.                                                               | 0.15  | 6.23  | 5.09E-14 | 1.60E-13 | brown |
| KIAA1279 | 26128 | KIAA1279 (KIAA1279), mRNA.                                                               | 0.05  | 7.69  | 1.95E-04 | 3.30E-04 | brown |
| KLHL22   | 84861 | kelch-like 22 (Drosophila) (KLHL22), mRNA.                                               | -0.09 | 10.44 | 1.52E-12 | 4.41E-12 | brown |
| KRBA1    | 84626 | KRAB-A domain containing 1 (KRBA1), mRNA.                                                | 0.06  | 6.33  | 4.37E-05 | 7.84E-05 | brown |
| KXD1     | 79036 | chromosome 19 open reading frame 50 (C19orf50), mRNA.                                    | -0.02 | 9.15  | 2.33E-01 | 2.73E-01 | brown |
| LDHA     | 3939  | lactate dehydrogenase A (LDHA), mRNA.                                                    | 0.01  | 7.56  | 6.65E-01 | 7.01E-01 | brown |
| LIPA     | 3988  | lipase A, lysosomal acid, cholesterol esterase (Wolman disease) (LIPA), mRNA.            | -0.07 | 8.38  | 5.01E-09 | 1.19E-08 | brown |
| LITAF    | 9516  | lipopolysaccharide-induced TNF factor (LITAF), mRNA.                                     | 0.12  | 7.75  | 4.21E-10 | 1.06E-09 | brown |

|        |        |                                                                                                |       |      |          |          |       |
|--------|--------|------------------------------------------------------------------------------------------------|-------|------|----------|----------|-------|
| LRR1   | 122769 | peptidylprolyl isomerase (cyclophilin)-like 5 (PPIL5), transcript variant 1, mRNA.             | -0.14 | 6.58 | 9.51E-10 | 2.35E-09 | brown |
| LRRC14 | 9684   | leucine rich repeat containing 14 (LRRC14), mRNA.                                              | 0.18  | 7.14 | 1.02E-25 | 5.72E-25 | brown |
| LRRC45 | 201255 | leucine rich repeat containing 45 (LRRC45), mRNA.                                              | 0.05  | 7.50 | 1.43E-03 | 2.22E-03 | brown |
| LRSAM1 | 90678  | leucine rich repeat and sterile alpha motif containing 1 (LRSAM1), transcript variant 3, mRNA. | 0.00  | 7.00 | 8.25E-01 | 8.49E-01 | brown |
| LRWD1  | 222229 | hypothetical protein DKFZp434K1815 (DKFZp434K1815), mRNA.                                      | 0.18  | 8.06 | 3.09E-23 | 1.54E-22 | brown |
| LSM5   | 23658  | LSM5 homolog, U6 small nuclear RNA associated (S. cerevisiae) (LSM5), mRNA.                    | 0.07  | 8.28 | 2.37E-05 | 4.36E-05 | brown |
| LTB4R  | 1241   | leukotriene B4 receptor (LTB4R), mRNA.                                                         | 0.08  | 9.57 | 4.61E-08 | 1.03E-07 | brown |
| MAD2L1 | 4085   | MAD2 mitotic arrest deficient-like 1 (yeast) (MAD2L1), mRNA.                                   | -0.02 | 8.52 | 6.80E-02 | 8.73E-02 | brown |
| MAP4K2 | 5871   | mitogen-activated protein kinase kinase kinase kinase 2 (MAP4K2), mRNA.                        | 0.09  | 8.76 | 6.22E-08 | 1.37E-07 | brown |
| MBP    | 4155   | myelin basic protein (MBP), transcript variant 8, mRNA.                                        | -0.29 | 9.91 | 1.22E-31 | 8.49E-31 | brown |

|        |        |                                                                                                          |       |       |          |          |       |
|--------|--------|----------------------------------------------------------------------------------------------------------|-------|-------|----------|----------|-------|
| MCM7   | 4176   | MCM7 minichromosome maintenance deficient 7 ( <i>S. cerevisiae</i> ) (MCM7), transcript variant 1, mRNA. | -0.41 | 6.81  | 2.65E-44 | 3.27E-43 | brown |
| MCOLN2 | 255231 | mucolipin 2 (MCOLN2), mRNA.                                                                              | -0.28 | 8.38  | 5.57E-50 | 8.70E-49 | brown |
| MCUR1  | 63933  | coiled-coil domain containing 90A (CCDC90A), mRNA.                                                       | -0.05 | 7.06  | 6.26E-03 | 9.12E-03 | brown |
| MED22  | 6837   | surfeit 5 (SURF5), transcript variant a, mRNA.                                                           | 0.13  | 9.54  | 1.11E-15 | 3.83E-15 | brown |
| MEF2D  | 4209   | MADS box transcription enhancer factor 2, polypeptide D (myocyte enhancer factor 2D) (MEF2D), mRNA.      | -0.07 | 5.93  | 7.77E-03 | 1.12E-02 | brown |
| MEPCE  | 56257  | bin3, bicoid-interacting 3, homolog ( <i>Drosophila</i> ) (BCDIN3), mRNA.                                | -0.06 | 6.28  | 4.34E-05 | 7.80E-05 | brown |
| METTL1 | 4234   | methyltransferase like 1 (METTL1), transcript variant 1, mRNA.                                           | 0.00  | 8.48  | 9.68E-01 | 9.73E-01 | brown |
| METTL5 | 29081  | methyltransferase like 5 (METTL5), mRNA.                                                                 | 0.13  | 10.94 | 4.02E-18 | 1.57E-17 | brown |
| MFSD3  | 113655 | major facilitator superfamily domain containing 3 (MFSD3), mRNA.                                         | -0.09 | 7.57  | 7.32E-09 | 1.72E-08 | brown |
| MGME1  | 92667  | chromosome 20 open reading frame 72 (C20orf72), mRNA.                                                    | 0.00  | 5.52  | 7.91E-01 | 8.18E-01 | brown |

|        |        |                                                                                                                        |       |       |          |          |       |
|--------|--------|------------------------------------------------------------------------------------------------------------------------|-------|-------|----------|----------|-------|
| MIEF1  | 54471  | Smith-Magenis syndrome chromosome region, candidate 7-like (SMCR7L), mRNA.                                             | 0.02  | 10.06 | 2.76E-01 | 3.19E-01 | brown |
| MMACHC | 25974  | methylmalonic aciduria (cobalamin deficiency) cblC type, with homocystinuria (MMACHC), mRNA.                           | -0.01 | 8.94  | 5.39E-01 | 5.84E-01 | brown |
| MOAP1  | 64112  | modulator of apoptosis 1 (MOAP1), mRNA.                                                                                | -0.01 | 6.08  | 6.10E-01 | 6.51E-01 | brown |
| MOB3A  | 126308 | MOB1, Mps One Binder kinase activator-like 2A (yeast) (MOBKL2A), mRNA.                                                 | 0.08  | 6.32  | 2.35E-08 | 5.32E-08 | brown |
| MOB3C  | 148932 | MOB1, Mps One Binder kinase activator-like 2C (yeast) (MOBKL2C), transcript variant 1, mRNA.                           | 0.01  | 11.60 | 4.00E-01 | 4.46E-01 | brown |
| MORC2  | 22880  | MORC family CW-type zinc finger 2 (MORC2), mRNA.                                                                       | -0.28 | 7.73  | 5.11E-48 | 7.64E-47 | brown |
| MRPL3  | 11222  | mitochondrial ribosomal protein L3 (MRPL3), nuclear gene encoding mitochondrial protein, mRNA.                         | 0.12  | 10.10 | 2.61E-10 | 6.69E-10 | brown |
| MRPL35 | 51318  | mitochondrial ribosomal protein L35 (MRPL35), nuclear gene encoding mitochondrial protein, transcript variant 1, mRNA. | 0.00  | 6.75  | 8.88E-01 | 9.06E-01 | brown |



|        |        |                                                                                                                                   |       |      |          |          |       |
|--------|--------|-----------------------------------------------------------------------------------------------------------------------------------|-------|------|----------|----------|-------|
| MRPL37 | 51253  | mitochondrial ribosomal protein L37 (MRPL37), nuclear gene encoding mitochondrial protein, mRNA.                                  | -0.11 | 6.85 | 8.05E-11 | 2.12E-10 | brown |
| MRPS10 | 55173  | mitochondrial ribosomal protein S10 (MRPS10), nuclear gene encoding mitochondrial protein, mRNA.                                  | -0.28 | 9.79 | 1.42E-43 | 1.70E-42 | brown |
| MTFR1  | 9650   | mitochondrial fission regulator 1 (MTFR1), mRNA.                                                                                  | -0.03 | 8.13 | 4.39E-02 | 5.78E-02 | brown |
| MYH9   | 4627   | myosin, heavy chain 9, non-muscle (MYH9), mRNA.                                                                                   | 0.10  | 8.65 | 4.24E-08 | 9.45E-08 | brown |
| NA     | 730316 | PREDICTED: similar to Nuclear envelope pore membrane protein POM 121 (Pore membrane protein of 121 kDa) (P145) (LOC730316), mRNA. | -0.24 | 8.99 | 4.59E-46 | 6.23E-45 | brown |
| NA     | 84992  | phosphatidylinositol glycan anchor biosynthesis, class Y (PIGY), transcript variant 2, mRNA.                                      | 0.27  | 7.04 | 4.90E-32 | 3.48E-31 | brown |
| NA     | 79716  | aminopeptidase-like 1 (NPEPL1), mRNA.                                                                                             | 0.11  | 8.82 | 8.55E-08 | 1.87E-07 | brown |
| NA     | 729843 | PREDICTED: similar to WW domain binding protein 1 (LOC729843), mRNA.                                                              | 0.06  | 5.98 | 2.88E-04 | 4.82E-04 | brown |
| NA     | 84129  | acyl-Coenzyme A dehydrogenase family, member 11 (ACAD11), mRNA.                                                                   | -0.04 | 8.22 | 4.91E-03 | 7.22E-03 | brown |

|        |       |                                                                                                 |       |      |          |          |       |
|--------|-------|-------------------------------------------------------------------------------------------------|-------|------|----------|----------|-------|
| NA     | 10588 | 5,10-methenyltetrahydrofolate synthetase (5-formyltetrahydrofolate cyclo-ligase) (MTHFS), mRNA. | -0.04 | 8.89 | 3.07E-02 | 4.11E-02 | brown |
| NA     | 26580 | Bernardinelli-Seip congenital lipodystrophy 2 (seipin) (BSCL2), mRNA.                           | 0.03  | 5.80 | 4.59E-02 | 6.02E-02 | brown |
| NAT10  | 55226 | N-acetyltransferase 10 (NAT10), mRNA.                                                           | 0.11  | 6.33 | 1.57E-12 | 4.55E-12 | brown |
| NCLN   | 56926 | nicalin homolog (zebrafish) (NCLN), mRNA.                                                       | -0.10 | 9.32 | 5.26E-19 | 2.15E-18 | brown |
| NCSTN  | 23385 | nicastrin (NCSTN), mRNA.                                                                        | -0.06 | 8.44 | 9.35E-06 | 1.78E-05 | brown |
| NDE1   | 54820 | nudE nuclear distribution gene E homolog 1 (A. nidulans) (NDE1), mRNA.                          | 0.05  | 5.85 | 4.49E-05 | 8.05E-05 | brown |
| NDNL2  | 56160 | necdin-like 2 (NDNL2), mRNA.                                                                    | -0.05 | 8.72 | 3.25E-05 | 5.91E-05 | brown |
| NDUFC1 | 4717  | NADH dehydrogenase (ubiquinone) 1, subcomplex unknown, 1, 6kDa (NDUFC1), mRNA.                  | 0.08  | 7.59 | 5.13E-06 | 9.96E-06 | brown |
| NDUFV2 | 4729  | NADH dehydrogenase (ubiquinone) flavoprotein 2, 24kDa (NDUFV2), mRNA.                           | 0.06  | 6.59 | 1.31E-02 | 1.84E-02 | brown |
| NFIC   | 4782  | nuclear factor I/C (CCAAT-binding transcription factor) (NFIC), transcript variant 2, mRNA.     | -0.21 | 8.06 | 2.50E-29 | 1.58E-28 | brown |

|          |       |                                                                                               |       |       |          |          |       |
|----------|-------|-----------------------------------------------------------------------------------------------|-------|-------|----------|----------|-------|
| NFKB1    | 4790  | nuclear factor of kappa light polypeptide gene enhancer in B-cells 1 (p105) (NFKB1), mRNA.    | -0.11 | 5.96  | 7.28E-10 | 1.81E-09 | brown |
| NFU1     | 27247 | NFU1 iron-sulfur cluster scaffold homolog (S. cerevisiae) (NFU1), transcript variant 4, mRNA. | 0.04  | 8.08  | 9.55E-03 | 1.36E-02 | brown |
| NIPSNAP1 | 8508  | nipsnap homolog 1 (C. elegans) (NIPSNAP1), mRNA.                                              | -0.01 | 10.16 | 6.25E-01 | 6.65E-01 | brown |
| NMT1     | 4836  | N-myristoyltransferase 1 (NMT1), mRNA.                                                        | 0.04  | 8.78  | 7.04E-03 | 1.02E-02 | brown |
| NOL12    | 79159 | hypothetical protein MGC3731 (MGC3731), mRNA.                                                 | -0.05 | 8.72  | 3.78E-03 | 5.62E-03 | brown |
| NOP2     | 4839  | nucleolar protein 1, 120kDa (NOL1), transcript variant 2, mRNA.                               | -0.06 | 8.94  | 5.11E-08 | 1.14E-07 | brown |
| NOTCH1   | 4851  | Notch homolog 1, translocation-associated (Drosophila) (NOTCH1), mRNA.                        | 0.09  | 6.64  | 1.19E-06 | 2.42E-06 | brown |
| NRBF2    | 29982 | nuclear receptor binding factor 2 (NRBF2), mRNA.                                              | -0.08 | 10.07 | 8.51E-09 | 1.99E-08 | brown |
| NSA2     | 10412 | TGF beta-inducible nuclear protein 1 (TINP1), mRNA.                                           | 0.14  | 7.19  | 8.37E-17 | 3.06E-16 | brown |
| NSMF     | 26012 | nasal embryonic LHRH factor (NELF), mRNA.                                                     | -0.31 | 8.26  | 2.30E-41 | 2.45E-40 | brown |
| NTPCR    | 84284 | chromosome 1 open reading frame 57 (C1orf57), mRNA.                                           | -0.47 | 6.47  | 6.68E-58 | 1.59E-56 | brown |

|         |       |                                                                                                                                      |       |      |          |          |       |
|---------|-------|--------------------------------------------------------------------------------------------------------------------------------------|-------|------|----------|----------|-------|
| NUP62   | 23636 | nucleoporin 62kDa (NUP62), transcript variant 4, mRNA.                                                                               | 0.06  | 8.08 | 3.38E-05 | 6.15E-05 | brown |
| NVL     | 4931  | nuclear VCP-like (NVL), transcript variant 2, mRNA.                                                                                  | -0.13 | 6.40 | 1.22E-10 | 3.18E-10 | brown |
| OIP5    | 11339 | Opa interacting protein 5 (OIP5), mRNA.                                                                                              | -0.04 | 9.20 | 3.53E-03 | 5.28E-03 | brown |
| OSBP    | 5007  | oxysterol binding protein (OSBP), mRNA.                                                                                              | -0.13 | 7.80 | 2.28E-12 | 6.54E-12 | brown |
| OTUD5   | 55593 | OTU domain containing 5 (OTUD5), mRNA.                                                                                               | 0.06  | 6.97 | 2.90E-07 | 6.12E-07 | brown |
| PACSIN2 | 11252 | protein kinase C and casein kinase substrate in neurons 2 (PACSIN2), mRNA.                                                           | -0.11 | 6.64 | 9.72E-14 | 3.00E-13 | brown |
| PAF1    | 54623 | Paf1, RNA polymerase II associated factor, homolog (S. cerevisiae) (PAF1), mRNA.                                                     | -0.18 | 8.18 | 3.53E-24 | 1.84E-23 | brown |
| PAPD5   | 64282 | PAP associated domain containing 5 (PAPD5), transcript variant 1, mRNA.                                                              | -0.10 | 7.65 | 3.21E-11 | 8.62E-11 | brown |
| PARP6   | 56965 | poly (ADP-ribose) polymerase family, member 6 (PARP6), mRNA.                                                                         | -0.09 | 7.45 | 4.05E-13 | 1.21E-12 | brown |
| PBK     | 55872 | PDZ binding kinase (PBK), mRNA.                                                                                                      | -0.17 | 7.36 | 6.54E-31 | 4.37E-30 | brown |
| PBRM1   | 55193 | polybromo 1 (PB1), transcript variant 2, mRNA.                                                                                       | 0.54  | 9.60 | 1.09E-52 | 1.89E-51 | brown |
| PCK2    | 5106  | phosphoenolpyruvate carboxykinase 2 (mitochondrial) (PCK2), nuclear gene encoding mitochondrial protein, transcript variant 1, mRNA. | -0.15 | 9.61 | 1.30E-32 | 9.45E-32 | brown |

|       |        |                                                                                                   |       |       |          |          |       |
|-------|--------|---------------------------------------------------------------------------------------------------|-------|-------|----------|----------|-------|
| PCNX  | 22990  | pecanex homolog (Drosophila) (PCNX), mRNA.                                                        | -0.05 | 9.41  | 4.67E-05 | 8.37E-05 | brown |
| PDCL3 | 79031  | phosducin-like 3 (PDCL3), mRNA.                                                                   | -0.10 | 7.29  | 1.35E-13 | 4.16E-13 | brown |
| PDDC1 | 347862 | Parkinson disease 7 domain containing 1 (PDDC1), mRNA.                                            | 0.12  | 8.70  | 2.17E-11 | 5.92E-11 | brown |
| PDXK  | 8566   | pyridoxal (pyridoxine, vitamin B6) kinase (PDXK), mRNA.                                           | -0.21 | 8.24  | 7.97E-32 | 5.60E-31 | brown |
| PDXP  | 57026  | pyridoxal (pyridoxine, vitamin B6) phosphatase (PDXP), mRNA.                                      | -0.06 | 9.91  | 1.38E-05 | 2.60E-05 | brown |
| PEBP1 | 5037   | phosphatidylethanolamine binding protein 1 (PEBP1), mRNA.                                         | 0.16  | 6.26  | 4.83E-20 | 2.07E-19 | brown |
| PES1  | 23481  | pescadillo homolog 1, containing BRCT domain (zebrafish) (PES1), mRNA.                            | -0.38 | 8.25  | 8.30E-61 | 2.37E-59 | brown |
| PEX2  | 5828   | peroxisomal membrane protein 3, 35kDa (Zellweger syndrome) (PXMP3), transcript variant 2, mRNA.   | 0.07  | 5.16  | 1.04E-04 | 1.81E-04 | brown |
| PEX26 | 55670  | peroxisome biogenesis factor 26 (PEX26), mRNA.                                                    | -0.06 | 7.85  | 2.52E-05 | 4.63E-05 | brown |
| PHB   | 5245   | prohibitin (PHB), mRNA.                                                                           | 0.19  | 6.60  | 1.45E-17 | 5.52E-17 | brown |
| PHRF1 | 57661  | CTD-binding SR-like protein rA9 (KIAA1542), mRNA.                                                 | -0.10 | 6.96  | 7.53E-10 | 1.87E-09 | brown |
| PI4KA | 5297   | phosphatidylinositol 4-kinase, catalytic, alpha polypeptide (PIK4CA), transcript variant 2, mRNA. | 0.48  | 10.00 | 6.70E-66 | 2.48E-64 | brown |

|        |       |                                                                                              |       |       |          |          |       |
|--------|-------|----------------------------------------------------------------------------------------------|-------|-------|----------|----------|-------|
| PIAS3  | 10401 | protein inhibitor of activated STAT, 3 (PIAS3), mRNA.                                        | -0.19 | 7.78  | 7.17E-29 | 4.47E-28 | brown |
| PIAS4  | 51588 | protein inhibitor of activated STAT, 4 (PIAS4), mRNA.                                        | 0.01  | 6.90  | 5.37E-01 | 5.82E-01 | brown |
| PIDD1  | 55367 | leucine-rich repeats and death domain containing (LRDD), transcript variant 2, mRNA.         | 0.05  | 7.37  | 3.73E-04 | 6.18E-04 | brown |
| PIGF   | 5281  | phosphatidylinositol glycan, class F (PIGF), transcript variant 2, mRNA.                     | 0.00  | 7.70  | 7.38E-01 | 7.69E-01 | brown |
| PIGP   | 51227 | phosphatidylinositol glycan anchor biosynthesis, class P (PIGP), transcript variant 2, mRNA. | -0.03 | 10.17 | 9.64E-03 | 1.37E-02 | brown |
| PIGQ   | 9091  | phosphatidylinositol glycan, class Q (PIGQ), transcript variant 2, mRNA.                     | -0.14 | 9.05  | 4.27E-14 | 1.35E-13 | brown |
| PIK3R2 | 5296  | phosphoinositide-3-kinase, regulatory subunit 2 (p85 beta) (PIK3R2), mRNA.                   | -0.07 | 7.54  | 2.97E-07 | 6.28E-07 | brown |
| PLOD1  | 5351  | procollagen-lysine 1, 2-oxoglutarate 5-dioxygenase 1 (PLOD1), mRNA.                          | 0.14  | 8.58  | 5.84E-22 | 2.72E-21 | brown |
| PNMAL1 | 55228 | hypothetical protein FLJ10781 (FLJ10781), mRNA.                                              | -0.01 | 10.02 | 3.03E-01 | 3.47E-01 | brown |
| POLA2  | 23649 | polymerase (DNA directed), alpha 2 (70kD subunit) (POLA2), mRNA.                             | -0.10 | 7.93  | 9.00E-16 | 3.11E-15 | brown |
| POLD2  | 5425  | polymerase (DNA directed), delta 2, regulatory subunit 50kDa (POLD2), mRNA.                  | -0.06 | 5.82  | 2.31E-04 | 3.89E-04 | brown |
| POLE   | 5426  | polymerase (DNA directed), epsilon (POLE), mRNA.                                             | -0.05 | 9.57  | 4.91E-05 | 8.77E-05 | brown |

|         |       |                                                                                                    |       |       |          |          |       |
|---------|-------|----------------------------------------------------------------------------------------------------|-------|-------|----------|----------|-------|
| POLG    | 5428  | polymerase (DNA directed), gamma (POLG), mRNA.                                                     | 0.00  | 5.61  | 7.47E-01 | 7.78E-01 | brown |
| POLR2A  | 5430  | polymerase (RNA) II (DNA directed) polypeptide A, 220kDa (POLR2A), mRNA.                           | 0.05  | 7.87  | 2.11E-05 | 3.89E-05 | brown |
| POU2AF1 | 5450  | POU domain, class 2, associating factor 1 (POU2AF1), mRNA.                                         | 0.00  | 7.89  | 8.24E-01 | 8.48E-01 | brown |
| PPDPF   | 79144 | chromosome 20 open reading frame 149 (C20orf149), mRNA.                                            | 0.08  | 8.59  | 1.59E-08 | 3.65E-08 | brown |
| PPP2R5D | 5528  | protein phosphatase 2, regulatory subunit B', delta isoform (PPP2R5D), transcript variant 2, mRNA. | 0.02  | 10.46 | 9.95E-02 | 1.25E-01 | brown |
| PPRC1   | 23082 | peroxisome proliferator-activated receptor gamma, coactivator-related 1 (PPRC1), mRNA.             | -0.02 | 5.42  | 3.54E-01 | 4.00E-01 | brown |
| PRDM4   | 11108 | PR domain containing 4 (PRDM4), mRNA.                                                              | -0.14 | 8.04  | 2.74E-18 | 1.07E-17 | brown |
| PRKD2   | 25865 | protein kinase D2 (PRKD2), transcript variant 4, mRNA.                                             | -0.46 | 10.10 | 1.96E-58 | 4.93E-57 | brown |
| PRKDC   | 5591  | protein kinase, DNA-activated, catalytic polypeptide (PRKDC), transcript variant 2, mRNA.          | 0.03  | 9.26  | 2.11E-02 | 2.89E-02 | brown |
| PRMT7   | 54496 | protein arginine methyltransferase 7 (PRMT7), mRNA.                                                | 0.12  | 9.11  | 1.25E-14 | 4.05E-14 | brown |

|           |       |                                                                                                                   |       |      |          |          |       |
|-----------|-------|-------------------------------------------------------------------------------------------------------------------|-------|------|----------|----------|-------|
| PRPF19    | 27339 | PRP19/PSO4 pre-mRNA processing factor 19 homolog ( <i>S. cerevisiae</i> ) (PRPF19), mRNA.                         | 0.05  | 8.81 | 1.80E-05 | 3.35E-05 | brown |
| PRR14     | 78994 | proline rich 14 (PRR14), mRNA.                                                                                    | 0.07  | 9.16 | 1.65E-04 | 2.81E-04 | brown |
| PSAP      | 5660  | prosaposin (variant Gaucher disease and variant metachromatic leukodystrophy) (PSAP), transcript variant 3, mRNA. | 0.05  | 8.88 | 4.96E-04 | 8.12E-04 | brown |
| PSMC3     | 5702  | proteasome (prosome, macropain) 26S subunit, ATPase, 3 (PSMC3), mRNA.                                             | 0.01  | 8.12 | 7.40E-01 | 7.71E-01 | brown |
| PSMD8     | 5714  | proteasome (prosome, macropain) 26S subunit, non-ATPase, 8 (PSMD8), mRNA.                                         | 0.08  | 6.68 | 4.90E-06 | 9.53E-06 | brown |
| PUF60     | 22827 | fuse-binding protein-interacting repressor (SIAHBP1), transcript variant 2, mRNA.                                 | -0.03 | 6.72 | 8.84E-02 | 1.12E-01 | brown |
| PUS1      | 80324 | pseudouridylate synthase 1 (PUS1), transcript variant 1, mRNA.                                                    | -0.40 | 6.51 | 2.74E-45 | 3.55E-44 | brown |
| RAB11FIP3 | 9727  | RAB11 family interacting protein 3 (class II) (RAB11FIP3), mRNA.                                                  | 0.13  | 8.92 | 8.37E-12 | 2.32E-11 | brown |
| RAB35     | 11021 | RAB35, member RAS oncogene family (RAB35), mRNA.                                                                  | 0.00  | 7.19 | 8.78E-01 | 8.97E-01 | brown |
| RABEPK    | 10244 | Rab9 effector protein with kelch motifs (RABEPK), mRNA.                                                           | 0.05  | 9.31 | 8.27E-05 | 1.45E-04 | brown |



|         |       |                                                                                       |       |      |          |          |       |
|---------|-------|---------------------------------------------------------------------------------------|-------|------|----------|----------|-------|
| RABGAP1 | 23637 | RAB GTPase activating protein 1 (RABGAP1), mRNA.                                      | 0.10  | 8.16 | 1.07E-07 | 2.34E-07 | brown |
| RABGGTA | 5875  | Rab geranylgeranyltransferase, alpha subunit (RABGGTA), transcript variant 1, mRNA.   | 0.03  | 8.34 | 5.89E-02 | 7.61E-02 | brown |
| RALGDS  | 5900  | ral guanine nucleotide dissociation stimulator (RALGDS), transcript variant 2, mRNA.  | -0.12 | 7.22 | 1.08E-14 | 3.52E-14 | brown |
| RANGAP1 | 5905  | Ran GTPase activating protein 1 (RANGAP1), mRNA.                                      | 0.40  | 7.12 | 5.70E-46 | 7.69E-45 | brown |
| RAPGEF1 | 2889  | Rap guanine nucleotide exchange factor (GEF) 1 (RAPGEF1), transcript variant 2, mRNA. | 0.04  | 8.06 | 2.09E-02 | 2.85E-02 | brown |
| RBM14   | 10432 | RNA binding motif protein 14 (RBM14), mRNA.                                           | -0.10 | 9.37 | 1.81E-14 | 5.83E-14 | brown |
| RBM22   | 55696 | RNA binding motif protein 22 (RBM22), mRNA.                                           | 0.05  | 7.38 | 4.16E-03 | 6.17E-03 | brown |
| RCC2    | 55920 | regulator of chromosome condensation 2 (RCC2), mRNA.                                  | 0.09  | 8.27 | 1.35E-08 | 3.12E-08 | brown |
| REXO4   | 57109 | REX4, RNA exonuclease 4 homolog (S. cerevisiae) (REXO4), mRNA.                        | -0.20 | 7.89 | 5.04E-27 | 2.96E-26 | brown |
| RFWD3   | 55159 | ring finger and WD repeat domain 3 (RFWD3), mRNA.                                     | -0.11 | 8.89 | 9.95E-21 | 4.39E-20 | brown |

|        |       |                                                                          |       |       |          |          |       |
|--------|-------|--------------------------------------------------------------------------|-------|-------|----------|----------|-------|
| RHBDF2 | 79651 | rhomboid 5 homolog 2 (Drosophila) (RHBDF2), transcript variant 2, mRNA.  | -0.12 | 7.55  | 5.33E-18 | 2.07E-17 | brown |
| RNF115 | 27246 | zinc finger protein 364 (ZNF364), mRNA.                                  | 0.00  | 7.56  | 8.70E-01 | 8.90E-01 | brown |
| RNMTL1 | 55178 | RNA methyltransferase like 1 (RNMTL1), mRNA.                             | 0.17  | 8.22  | 2.64E-19 | 1.09E-18 | brown |
| RNPEP  | 6051  | arginyl aminopeptidase (aminopeptidase B) (RNPEP), mRNA.                 | 0.07  | 8.69  | 2.92E-05 | 5.34E-05 | brown |
| RP9    | 6100  | retinitis pigmentosa 9 (autosomal dominant) (RP9), mRNA.                 | -0.14 | 5.80  | 4.15E-20 | 1.79E-19 | brown |
| RPA3   | 6119  | replication protein A3, 14kDa (RPA3), mRNA.                              | -0.08 | 7.55  | 2.56E-09 | 6.18E-09 | brown |
| RPL23A | 6147  | ribosomal protein L23a (RPL23A), mRNA.                                   | -0.02 | 6.92  | 1.95E-01 | 2.31E-01 | brown |
| RSPRY1 | 89970 | ring finger and SPRY domain containing 1 (RSPRY1), mRNA.                 | 0.05  | 10.41 | 8.69E-03 | 1.25E-02 | brown |
| RSRC2  | 65117 | arginine/serine-rich coiled-coil 2 (RSRC2), transcript variant 1, mRNA.  | -0.08 | 10.31 | 1.07E-07 | 2.33E-07 | brown |
| RTCA   | 8634  | RNA terminal phosphate cyclase domain 1 (RTCD1), mRNA.                   | 0.01  | 9.13  | 7.13E-01 | 7.47E-01 | brown |
| RTCB   | 51493 | chromosome 22 open reading frame 28 (C22orf28), mRNA.                    | 0.02  | 7.89  | 3.47E-01 | 3.93E-01 | brown |
| RUNX3  | 864   | runt-related transcription factor 3 (RUNX3), transcript variant 2, mRNA. | 0.02  | 8.18  | 1.76E-01 | 2.11E-01 | brown |

|         |       |                                                                                     |       |       |          |          |       |
|---------|-------|-------------------------------------------------------------------------------------|-------|-------|----------|----------|-------|
| RXRB    | 6257  | retinoid X receptor, beta (RXRB), mRNA.                                             | -0.04 | 8.84  | 4.42E-02 | 5.81E-02 | brown |
| SAFB    | 6294  | scaffold attachment factor B (SAFB), mRNA.                                          | 0.08  | 6.63  | 3.23E-08 | 7.27E-08 | brown |
| SCAMP3  | 10067 | secretory carrier membrane protein 3 (SCAMP3), transcript variant 2, mRNA.          | 0.02  | 7.13  | 2.84E-01 | 3.26E-01 | brown |
| SCARB1  | 949   | scavenger receptor class B, member 1 (SCARB1), mRNA.                                | -0.35 | 6.28  | 1.00E-36 | 8.78E-36 | brown |
| SCRIB   | 23513 | scribbled homolog (Drosophila) (SCRIB), transcript variant 1, mRNA.                 | 0.06  | 10.55 | 2.90E-07 | 6.13E-07 | brown |
| SDCBP   | 6386  | syndecan binding protein (syntenin) (SDCBP), transcript variant 5, mRNA.            | 0.02  | 10.10 | 1.55E-01 | 1.88E-01 | brown |
| SDCCAG3 | 10807 | serologically defined colon cancer antigen 3 (SDCCAG3), transcript variant 2, mRNA. | -0.01 | 10.17 | 5.76E-01 | 6.19E-01 | brown |
| SF3A3   | 10946 | splicing factor 3a, subunit 3, 60kDa (SF3A3), mRNA.                                 | 0.11  | 7.78  | 1.23E-12 | 3.59E-12 | brown |
| SF3B2   | 10992 | splicing factor 3b, subunit 2, 145kDa (SF3B2), mRNA.                                | -0.06 | 11.17 | 2.21E-05 | 4.09E-05 | brown |
| SFMBT2  | 57713 | Scm-like with four mbt domains 2 (SFMBT2), mRNA.                                    | 0.42  | 7.10  | 7.14E-51 | 1.15E-49 | brown |
| SGSM2   | 9905  | RUN and TBC1 domain containing 1 (RUTBC1), mRNA.                                    | 0.02  | 5.89  | 8.14E-02 | 1.03E-01 | brown |
| SH3BGRL | 6451  | SH3 domain binding glutamic acid-rich protein like (SH3BGRL), mRNA.                 | -0.09 | 9.40  | 1.40E-13 | 4.29E-13 | brown |

|          |       |                                                                                                                      |       |      |              |              |       |
|----------|-------|----------------------------------------------------------------------------------------------------------------------|-------|------|--------------|--------------|-------|
| SHMT1    | 6470  | serine<br>hydroxymethyltransferase 1<br>(soluble) (SHMT1), transcript<br>variant 1, mRNA.                            | 0.00  | 9.89 | 8.66E-<br>01 | 8.87E-<br>01 | brown |
| SIPA1    | 6494  | signal-induced proliferation-<br>associated gene 1 (SIPA1),<br>transcript variant 2, mRNA.                           | -0.23 | 8.64 | 8.60E-<br>23 | 4.20E-<br>22 | brown |
| SIPA1L1  | 26037 | signal-induced proliferation-<br>associated 1 like 1 (SIPA1L1),<br>mRNA.                                             | -0.13 | 7.09 | 8.69E-<br>18 | 3.34E-<br>17 | brown |
| SIRT7    | 51547 | sirtuin (silent mating type<br>information regulation 2<br>homolog) 7 ( <i>S. cerevisiae</i> )<br>(SIRT7), mRNA.     | 0.01  | 7.85 | 4.52E-<br>01 | 4.99E-<br>01 | brown |
| SKAP2    | 8935  | src kinase associated<br>phosphoprotein 2 (SKAP2),<br>mRNA.                                                          | -0.47 | 9.17 | 2.21E-<br>58 | 5.49E-<br>57 | brown |
| SLC12A9  | 56996 | solute carrier family 12<br>(potassium/chloride<br>transporters), member 9<br>(SLC12A9), mRNA.                       | 0.11  | 6.14 | 3.98E-<br>16 | 1.40E-<br>15 | brown |
| SLC25A10 | 1468  | solute carrier family 25<br>(mitochondrial carrier;<br>dicarboxylate transporter),<br>member 10 (SLC25A10),<br>mRNA. | -0.01 | 9.75 | 5.79E-<br>01 | 6.23E-<br>01 | brown |

|          |        |                                                                                                                                                   |       |       |          |          |       |
|----------|--------|---------------------------------------------------------------------------------------------------------------------------------------------------|-------|-------|----------|----------|-------|
| SLC25A19 | 60386  | solute carrier family 25 (mitochondrial thiamine pyrophosphate carrier), member 19 (SLC25A19), mRNA.                                              | 0.39  | 9.52  | 3.27E-39 | 3.17E-38 | brown |
| SLC25A5  | 292    | solute carrier family 25 (mitochondrial carrier; adenine nucleotide translocator), member 5 (SLC25A5), mRNA.                                      | 0.03  | 8.49  | 4.40E-02 | 5.79E-02 | brown |
| SLC26A6  | 65010  | solute carrier family 26, member 6 (SLC26A6), transcript variant 1, mRNA.                                                                         | 0.02  | 9.85  | 1.46E-01 | 1.77E-01 | brown |
| SLC35B2  | 347734 | solute carrier family 35, member B2 (SLC35B2), mRNA.                                                                                              | -0.02 | 7.58  | 2.02E-01 | 2.40E-01 | brown |
| SLC9A1   | 6548   | solute carrier family 9 (sodium/hydrogen exchanger), member 1 (antiporter, Na <sup>+</sup> /H <sup>+</sup> , amiloride sensitive) (SLC9A1), mRNA. | 0.01  | 9.98  | 4.53E-01 | 4.99E-01 | brown |
| SLX4     | 84464  | BTB (POZ) domain containing 12 (BTBD12), mRNA.                                                                                                    | 0.06  | 8.31  | 4.26E-06 | 8.32E-06 | brown |
| SMARCA4  | 6597   | SWI/SNF related, matrix associated, actin dependent regulator of chromatin, subfamily a, member 4 (SMARCA4), mRNA.                                | 0.00  | 10.69 | 9.25E-01 | 9.36E-01 | brown |

|         |       |                                                                                                                                                              |       |      |          |          |       |
|---------|-------|--------------------------------------------------------------------------------------------------------------------------------------------------------------|-------|------|----------|----------|-------|
| SNAPC4  | 6621  | small nuclear RNA activating complex, polypeptide 4, 190kDa (SNAPC4), mRNA.                                                                                  | -0.16 | 8.66 | 5.32E-27 | 3.12E-26 | brown |
| SNRPB   | 6628  | small nuclear ribonucleoprotein polypeptides B and B1 (SNRPB), transcript variant 1, mRNA.                                                                   | 0.03  | 6.87 | 4.65E-02 | 6.09E-02 | brown |
| SNX27   | 81609 | sorting nexin family member 27 (SNX27), mRNA.                                                                                                                | -0.12 | 7.74 | 5.24E-10 | 1.32E-09 | brown |
| SPCS1   | 28972 | signal peptidase complex subunit 1 homolog (S. cerevisiae) (SPCS1), mRNA.                                                                                    | 0.32  | 7.06 | 2.82E-41 | 2.98E-40 | brown |
| SPECC1L | 23384 | SPECC1-like (SPECC1L), mRNA.                                                                                                                                 | -0.02 | 9.53 | 8.23E-02 | 1.04E-01 | brown |
| SPG7    | 6687  | spastic paraplegia 7, paraplegin (pure and complicated autosomal recessive) (SPG7), nuclear gene encoding mitochondrial protein, transcript variant 1, mRNA. | -0.05 | 8.30 | 1.48E-03 | 2.30E-03 | brown |
| SPHK2   | 56848 | sphingosine kinase 2 (SPHK2), mRNA.                                                                                                                          | 0.08  | 6.70 | 1.24E-06 | 2.51E-06 | brown |
| SPNS1   | 83985 | spinster (SPIN1), mRNA.                                                                                                                                      | -0.22 | 5.84 | 4.43E-24 | 2.30E-23 | brown |
| SPRYD3  | 84926 | SPRY domain containing 3 (SPRYD3), mRNA.                                                                                                                     | -0.07 | 7.13 | 9.55E-06 | 1.82E-05 | brown |
| SRSF5   | 6430  | splicing factor, arginine/serine-rich 5 (SFRS5), transcript variant 1, mRNA.                                                                                 | 0.05  | 8.55 | 6.47E-03 | 9.42E-03 | brown |
| SRSF6   | 6431  | splicing factor, arginine/serine-rich 6 (SFRS6), mRNA.                                                                                                       | -0.11 | 9.75 | 1.45E-15 | 4.96E-15 | brown |

|         |       |                                                                                                                       |       |      |          |          |       |
|---------|-------|-----------------------------------------------------------------------------------------------------------------------|-------|------|----------|----------|-------|
| ST3GAL2 | 6483  | ST3 beta-galactoside alpha-2,3-sialyltransferase 2 (ST3GAL2), mRNA.                                                   | -0.09 | 8.39 | 4.75E-10 | 1.20E-09 | brown |
| STEAP3  | 55240 | STEAP family member 3 (STEAP3), transcript variant 3, mRNA.                                                           | -0.06 | 7.28 | 2.91E-04 | 4.87E-04 | brown |
| STK25   | 10494 | serine/threonine kinase 25 (STE20 homolog, yeast) (STK25), mRNA.                                                      | -0.24 | 8.99 | 4.36E-37 | 3.86E-36 | brown |
| STRADA  | 92335 | protein kinase LYK5 (LYK5), transcript variant 2, mRNA.                                                               | -0.03 | 7.43 | 1.05E-01 | 1.31E-01 | brown |
| STX16   | 8675  | syntaxin 16 (STX16), transcript variant 2, mRNA.                                                                      | 0.08  | 5.46 | 8.12E-05 | 1.43E-04 | brown |
| TACC1   | 6867  | transforming, acidic coiled-coil containing protein 1 (TACC1), mRNA.                                                  | 0.03  | 6.39 | 2.43E-02 | 3.30E-02 | brown |
| TAF15   | 8148  | TAF15 RNA polymerase II, TATA box binding protein (TBP)-associated factor, 68kDa (TAF15), transcript variant 1, mRNA. | 0.20  | 9.10 | 3.97E-26 | 2.25E-25 | brown |
| TAPBPL  | 55080 | TAP binding protein-like (TAPBPL), mRNA.                                                                              | 0.01  | 8.37 | 6.19E-01 | 6.59E-01 | brown |
| TATDN1  | 83940 | TatD DNase domain containing 1 (TATDN1), mRNA.                                                                        | -0.11 | 7.07 | 3.14E-14 | 9.98E-14 | brown |
| TBL3    | 10607 | transducin (beta)-like 3 (TBL3), mRNA.                                                                                | 0.43  | 8.31 | 2.78E-57 | 6.42E-56 | brown |
| TCF25   | 22980 | transcription factor 25 (basic helix-loop-helix) (TCF25), mRNA.                                                       | 0.00  | 7.12 | 9.48E-01 | 9.55E-01 | brown |

|         |        |                                                                                |       |       |          |          |       |
|---------|--------|--------------------------------------------------------------------------------|-------|-------|----------|----------|-------|
| TELO2   | 9894   | TEL2, telomere maintenance 2, homolog ( <i>S. cerevisiae</i> ) (TELO2), mRNA.  | 0.17  | 9.21  | 1.39E-21 | 6.38E-21 | brown |
| THEM6   | 51337  | chromosome 8 open reading frame 55 (C8orf55), mRNA.                            | 0.03  | 8.12  | 6.92E-02 | 8.87E-02 | brown |
| THOC5   | 8563   | THO complex 5 (THOC5), transcript variant 3, mRNA.                             | 0.03  | 11.03 | 3.99E-02 | 5.27E-02 | brown |
| TICAM1  | 148022 | toll-like receptor adaptor molecule 1 (TICAM1), transcript variant 2, mRNA.    | 0.08  | 5.84  | 1.40E-07 | 3.03E-07 | brown |
| TIMM22  | 29928  | translocase of inner mitochondrial membrane 22 homolog (yeast) (TIMM22), mRNA. | 0.09  | 10.08 | 3.67E-12 | 1.04E-11 | brown |
| TIMM23  | 10431  | translocase of inner mitochondrial membrane 23 homolog (yeast) (TIMM23), mRNA. | 0.04  | 8.96  | 3.97E-02 | 5.24E-02 | brown |
| TJAP1   | 93643  | tight junction associated protein 1 (peripheral) (TJAP1), mRNA.                | 0.06  | 7.22  | 1.22E-04 | 2.10E-04 | brown |
| TMED3   | 23423  | transmembrane emp24 protein transport domain containing 3 (TMED3), mRNA.       | 0.11  | 8.76  | 8.35E-09 | 1.95E-08 | brown |
| TMEM147 | 10430  | transmembrane protein 147 (TMEM147), mRNA.                                     | 0.01  | 8.67  | 5.62E-01 | 6.06E-01 | brown |
| TMEM175 | 84286  | transmembrane protein 175 (TMEM175), mRNA.                                     | -0.35 | 11.21 | 1.64E-69 | 7.32E-68 | brown |
| TMEM219 | 124446 | hypothetical protein BC017488 (LOC124446), mRNA.                               | -0.06 | 5.78  | 2.09E-05 | 3.87E-05 | brown |



|           |        |                                                                                                             |       |       |          |          |       |
|-----------|--------|-------------------------------------------------------------------------------------------------------------|-------|-------|----------|----------|-------|
| TMEM87A   | 25963  | transmembrane protein 87A (TMEM87A), mRNA.                                                                  | 0.09  | 7.09  | 2.43E-09 | 5.87E-09 | brown |
| TNFRSF10B | 8795   | tumor necrosis factor receptor superfamily, member 10b (TNFRSF10B), transcript variant 1, mRNA.             | -0.12 | 9.20  | 6.37E-15 | 2.10E-14 | brown |
| TNFRSF13C | 115650 | tumor necrosis factor receptor superfamily, member 13C (TNFRSF13C), mRNA.                                   | -0.11 | 7.58  | 2.89E-06 | 5.72E-06 | brown |
| TNFRSF14  | 8764   | tumor necrosis factor receptor superfamily, member 14 (herpesvirus entry mediator) (TNFRSF14), mRNA.        | 0.15  | 8.34  | 1.25E-15 | 4.27E-15 | brown |
| TNFRSF1B  | 7133   | tumor necrosis factor receptor superfamily, member 1B (TNFRSF1B), mRNA.                                     | -0.03 | 10.48 | 9.57E-03 | 1.36E-02 | brown |
| TOMM34    | 10953  | translocase of outer mitochondrial membrane 34 (TOMM34), nuclear gene encoding mitochondrial protein, mRNA. | -0.10 | 6.68  | 2.28E-08 | 5.17E-08 | brown |
| TOMM40    | 10452  | translocase of outer mitochondrial membrane 40 homolog (yeast) (TOMM40), mRNA.                              | 0.19  | 8.36  | 1.49E-22 | 7.18E-22 | brown |
| TOP3B     | 8940   | topoisomerase (DNA) III beta (TOP3B), mRNA.                                                                 | 0.03  | 8.57  | 9.95E-03 | 1.42E-02 | brown |

|         |        |                                                                               |       |       |          |          |       |
|---------|--------|-------------------------------------------------------------------------------|-------|-------|----------|----------|-------|
| TPD52L2 | 7165   | tumor protein D52-like 2 (TPD52L2), transcript variant 4, mRNA.               | -0.10 | 7.79  | 7.00E-15 | 2.30E-14 | brown |
| TPK1    | 27010  | thiamin pyrophosphokinase 1 (TPK1), transcript variant 1, mRNA.               | -0.01 | 7.06  | 5.95E-01 | 6.37E-01 | brown |
| TRABD   | 80305  | TraB domain containing (TRABD), mRNA.                                         | -0.05 | 6.69  | 1.81E-03 | 2.79E-03 | brown |
| TRIM24  | 8805   | tripartite motif-containing 24 (TRIM24), transcript variant 1, mRNA.          | -0.01 | 10.37 | 3.89E-01 | 4.35E-01 | brown |
| TRMT1   | 55621  | TRM1 tRNA methyltransferase 1 homolog ( <i>S. cerevisiae</i> ) (TRMT1), mRNA. | 0.00  | 8.97  | 8.90E-01 | 9.07E-01 | brown |
| TSPAN33 | 340348 | tetraspanin 33 (TSPAN33), mRNA.                                               | 0.04  | 7.19  | 5.10E-04 | 8.34E-04 | brown |
| TUBA1B  | 10376  | tubulin, alpha 1b (TUBA1B), mRNA.                                             | 0.01  | 8.65  | 4.49E-01 | 4.95E-01 | brown |
| TUBA1C  | 84790  | tubulin, alpha 1c (TUBA1C), mRNA.                                             | -0.28 | 8.11  | 3.26E-44 | 3.99E-43 | brown |
| TUBG1   | 7283   | tubulin, gamma 1 (TUBG1), mRNA.                                               | 0.11  | 9.75  | 3.16E-16 | 1.12E-15 | brown |
| TXLNA   | 200081 | taxilin alpha (TXLNA), mRNA.                                                  | -0.07 | 8.95  | 1.81E-05 | 3.38E-05 | brown |
| TYK2    | 7297   | tyrosine kinase 2 (TYK2), mRNA.                                               | -0.30 | 7.51  | 2.21E-27 | 1.32E-26 | brown |
| TYSND1  | 219743 | trypsin domain containing 1 (TYSND1), transcript variant 2, mRNA.             | -0.03 | 5.41  | 5.17E-02 | 6.73E-02 | brown |
| UBAP2   | 55833  | ubiquitin associated protein 2 (UBAP2), mRNA.                                 | 0.24  | 7.13  | 1.66E-36 | 1.43E-35 | brown |
| UBE2L3  | 7332   | ubiquitin-conjugating enzyme E2L 3 (UBE2L3), transcript variant 1, mRNA.      | -0.18 | 9.49  | 7.71E-27 | 4.49E-26 | brown |

|       |        |                                                                                                                 |       |       |          |          |       |
|-------|--------|-----------------------------------------------------------------------------------------------------------------|-------|-------|----------|----------|-------|
| UBN1  | 29855  | ubinnuclein 1 (UBN1), transcript variant 1, mRNA.                                                               | 0.03  | 7.78  | 1.01E-01 | 1.26E-01 | brown |
| UCHL5 | 51377  | ubiquitin carboxyl-terminal hydrolase L5 (UCHL5), mRNA.                                                         | 0.08  | 6.51  | 2.56E-06 | 5.06E-06 | brown |
| UCP2  | 7351   | uncoupling protein 2 (mitochondrial, proton carrier) (UCP2), nuclear gene encoding mitochondrial protein, mRNA. | -0.16 | 6.01  | 2.60E-21 | 1.18E-20 | brown |
| UIMC1 | 51720  | ubiquitin interaction motif containing 1 (UIMC1), mRNA.                                                         | 0.16  | 8.62  | 2.21E-18 | 8.69E-18 | brown |
| ULK1  | 8408   | unc-51-like kinase 1 (C. elegans) (ULK1), mRNA.                                                                 | -0.07 | 6.50  | 9.22E-06 | 1.76E-05 | brown |
| VARS2 | 57176  | valyl-tRNA synthetase 2, mitochondrial (putative) (VARS2), mRNA.                                                | 0.06  | 8.12  | 2.09E-05 | 3.86E-05 | brown |
| VBPI  | 7411   | von Hippel-Lindau binding protein 1 (VBPI), mRNA.                                                               | -0.01 | 5.40  | 4.59E-01 | 5.05E-01 | brown |
| VDAC2 | 7417   | voltage-dependent anion channel 2 (VDAC2), mRNA.                                                                | 0.13  | 10.13 | 1.14E-15 | 3.93E-15 | brown |
| VEGFB | 7423   | vascular endothelial growth factor B (VEGFB), mRNA.                                                             | 0.11  | 5.68  | 4.17E-08 | 9.30E-08 | brown |
| VPS16 | 64601  | vacuolar protein sorting 16 homolog (S. cerevisiae) (VPS16), transcript variant 2, mRNA.                        | 0.02  | 10.47 | 7.27E-02 | 9.29E-02 | brown |
| VPS39 | 23339  | vacuolar protein sorting 39 homolog (S. cerevisiae) (VPS39), mRNA.                                              | -0.22 | 7.02  | 5.37E-31 | 3.60E-30 | brown |
| VWCE  | 220001 | von Willebrand factor C and EGF domains (VWCE), mRNA.                                                           | -0.04 | 6.37  | 4.18E-03 | 6.19E-03 | brown |

|          |       |                                                                                 |       |       |          |          |       |
|----------|-------|---------------------------------------------------------------------------------|-------|-------|----------|----------|-------|
| WBP2     | 23558 | WW domain binding protein 2 (WBP2), mRNA.                                       | 0.02  | 7.23  | 1.92E-01 | 2.28E-01 | brown |
| WDR18    | 57418 | WD repeat domain 18 (WDR18), mRNA.                                              | 0.14  | 7.07  | 1.07E-16 | 3.92E-16 | brown |
| WDR60    | 55112 | WD repeat domain 60 (WDR60), mRNA.                                              | 0.02  | 7.62  | 2.77E-01 | 3.20E-01 | brown |
| WRB      | 7485  | tryptophan rich basic protein (WRB), mRNA.                                      | 0.11  | 9.05  | 1.68E-16 | 6.04E-16 | brown |
| XRCC6BP1 | 91419 | XRCC6 binding protein 1 (XRCC6BP1), mRNA.                                       | 0.05  | 6.91  | 1.47E-02 | 2.05E-02 | brown |
| YARS     | 8565  | tyrosyl-tRNA synthetase (YARS), mRNA.                                           | 0.04  | 6.42  | 1.17E-02 | 1.65E-02 | brown |
| YIPF4    | 84272 | Yip1 domain family, member 4 (YIPF4), mRNA.                                     | -0.02 | 7.60  | 1.17E-01 | 1.45E-01 | brown |
| YY1      | 7528  | YY1 transcription factor (YY1), mRNA.                                           | 0.03  | 9.01  | 2.65E-02 | 3.58E-02 | brown |
| ZCCHC6   | 79670 | zinc finger, CCHC domain containing 6 (ZCCHC6), mRNA.                           | -0.05 | 7.49  | 4.22E-05 | 7.59E-05 | brown |
| ZDHHC16  | 84287 | zinc finger, DHHC-type containing 16 (ZDHHC16), transcript variant 5, mRNA.     | 0.04  | 11.17 | 8.46E-03 | 1.22E-02 | brown |
| ZDHHC5   | 25921 | zinc finger, DHHC-type containing 5 (ZDHHC5), mRNA.                             | 0.21  | 9.69  | 2.35E-25 | 1.29E-24 | brown |
| ZDHHC8   | 29801 | zinc finger, DHHC-type containing 8 (ZDHHC8), mRNA.                             | -0.02 | 8.94  | 2.10E-01 | 2.48E-01 | brown |
| ZGPAT    | 84619 | zinc finger, CCCH-type with G patch domain (ZGPAT), transcript variant 2, mRNA. | 0.02  | 8.10  | 3.10E-01 | 3.55E-01 | brown |
| ZMIZ2    | 83637 | zinc finger, MIZ-type containing 2 (ZMIZ2), transcript variant 1, mRNA.         | 0.05  | 8.91  | 4.63E-03 | 6.84E-03 | brown |

|         |        |                                                                                   |       |       |          |          |       |
|---------|--------|-----------------------------------------------------------------------------------|-------|-------|----------|----------|-------|
| ZMYND19 | 116225 | zinc finger, MYND-type containing 19 (ZMYND19), mRNA.                             | -0.04 | 8.60  | 2.47E-03 | 3.75E-03 | brown |
| ZNF142  | 7701   | zinc finger protein 142 (ZNF142), mRNA.                                           | 0.18  | 7.44  | 1.42E-27 | 8.55E-27 | brown |
| ZNF329  | 79673  | zinc finger protein 329 (ZNF329), mRNA.                                           | -0.18 | 9.22  | 1.34E-19 | 5.62E-19 | brown |
| ZNF428  | 126299 | zinc finger protein 428 (ZNF428), mRNA.                                           | -0.64 | 8.14  | 1.42E-81 | 1.38E-79 | brown |
| ZNF512  | 84450  | zinc finger protein 512 (ZNF512), mRNA.                                           | -0.03 | 9.42  | 7.23E-02 | 9.24E-02 | brown |
| ZNF672  | 79894  | zinc finger protein 672 (ZNF672), mRNA.                                           | -0.23 | 8.10  | 3.67E-36 | 3.11E-35 | brown |
| ZNF689  | 115509 | zinc finger protein 689 (ZNF689), mRNA.                                           | -0.04 | 10.11 | 3.24E-03 | 4.86E-03 | brown |
| ZNF777  | 27153  | zinc finger protein 777 (ZNF777), mRNA.                                           | 0.12  | 9.11  | 8.91E-13 | 2.62E-12 | brown |
| ZSCAN21 | 7589   | zinc finger and SCAN domain containing 21 (ZSCAN21), mRNA.                        | -0.01 | 6.53  | 5.97E-01 | 6.38E-01 | brown |
| ZSWIM1  | 90204  | zinc finger, SWIM-type containing 1 (ZSWIM1), mRNA.                               | 0.00  | 7.18  | 8.88E-01 | 9.06E-01 | brown |
| ACYP1   | 97     | acylphosphatase 1, erythrocyte (common) type (ACYP1), transcript variant 2, mRNA. | -0.14 | 6.26  | 7.78E-17 | 2.85E-16 | cyan  |
| ADGRE5  | 976    | CD97 molecule (CD97), transcript variant 3, mRNA.                                 | 0.16  | 9.81  | 3.72E-31 | 2.52E-30 | cyan  |
| AK2     | 204    | adenylate kinase 2 (AK2), transcript variant AK2A, mRNA.                          | 0.24  | 9.71  | 2.31E-34 | 1.80E-33 | cyan  |

|         |        |                                                                                                                                                                   |       |       |          |          |      |
|---------|--------|-------------------------------------------------------------------------------------------------------------------------------------------------------------------|-------|-------|----------|----------|------|
| APOA1BP | 128240 | apolipoprotein A-I binding protein (APOA1BP), mRNA.                                                                                                               | 0.10  | 11.34 | 6.51E-13 | 1.93E-12 | cyan |
| APOOL   | 139322 | apolipoprotein O-like (APOOL), mRNA.                                                                                                                              | 0.03  | 7.00  | 6.72E-02 | 8.63E-02 | cyan |
| ATP5J   | 522    | ATP synthase, H <sup>+</sup> transporting, mitochondrial F0 complex, subunit F6 (ATP5J), nuclear gene encoding mitochondrial protein, transcript variant 1, mRNA. | 0.39  | 8.17  | 4.17E-47 | 5.99E-46 | cyan |
| BOLA3   | 388962 | bolA homolog 3 (E. coli) (BOLA3), transcript variant 2, mRNA.                                                                                                     | 0.02  | 7.31  | 1.68E-01 | 2.02E-01 | cyan |
| BTF3    | 689    | basic transcription factor 3 (BTF3), transcript variant 2, mRNA.                                                                                                  | -0.21 | 6.90  | 4.48E-28 | 2.74E-27 | cyan |
| C14orf2 | 9556   | chromosome 14 open reading frame 2 (C14orf2), mRNA.                                                                                                               | 0.45  | 11.41 | 1.83E-82 | 1.85E-80 | cyan |
| CCDC23  | 374969 | coiled-coil domain containing 23 (CCDC23), mRNA.                                                                                                                  | -0.01 | 12.05 | 4.81E-01 | 5.26E-01 | cyan |
| CCDC58  | 131076 | coiled-coil domain containing 58 (CCDC58), mRNA.                                                                                                                  | -0.18 | 6.42  | 8.20E-21 | 3.63E-20 | cyan |
| CDV3    | 55573  | CDV3 homolog (mouse) (CDV3), mRNA. XM_945284 XM_945286 XM_945287                                                                                                  | 0.15  | 8.26  | 8.69E-31 | 5.78E-30 | cyan |
| CHFR    | 55743  | checkpoint with forkhead and ring finger domains (CHFR), mRNA.                                                                                                    | -0.50 | 9.01  | 1.90E-75 | 1.13E-73 | cyan |
| CKS1B   | 1163   | CDC28 protein kinase regulatory subunit 1B (CKS1B), mRNA.                                                                                                         | 0.12  | 8.15  | 8.13E-09 | 1.90E-08 | cyan |

|         |        |                                                                                               |       |      |          |          |      |
|---------|--------|-----------------------------------------------------------------------------------------------|-------|------|----------|----------|------|
| CKS2    | 1164   | CDC28 protein kinase regulatory subunit 2 (CKS2), mRNA.                                       | 0.07  | 8.04 | 1.97E-03 | 3.02E-03 | cyan |
| CLPTM1L | 81037  | CLPTM1-like (CLPTM1L), mRNA.                                                                  | 0.05  | 8.23 | 1.08E-03 | 1.70E-03 | cyan |
| CMC1    | 152100 | hypothetical protein MGC61571 (MGC61571), mRNA.                                               | 0.11  | 9.83 | 5.98E-12 | 1.68E-11 | cyan |
| CMSS1   | 84319  | chromosome 3 open reading frame 26 (C3orf26), mRNA.                                           | 0.12  | 8.22 | 1.71E-12 | 4.94E-12 | cyan |
| CNIH4   | 29097  | cornichon homolog 4 (Drosophila) (CNIH4), mRNA.                                               | -0.08 | 8.05 | 7.06E-10 | 1.76E-09 | cyan |
| COMMD6  | 170622 | COMM domain containing 6 (COMMD6), transcript variant 2, mRNA.                                | 0.03  | 9.22 | 6.65E-02 | 8.53E-02 | cyan |
| COQ3    | 51805  | coenzyme Q3 homolog, methyltransferase (S. cerevisiae) (COQ3), mRNA.                          | 0.01  | 8.34 | 4.89E-01 | 5.34E-01 | cyan |
| COX6B1  | 1340   | cytochrome c oxidase subunit Vib polypeptide 1 (ubiquitous) (COX6B1), mRNA.                   | 0.04  | 6.83 | 1.01E-01 | 1.26E-01 | cyan |
| COX7A2  | 1347   | cytochrome c oxidase subunit VIIa polypeptide 2 (liver) (COX7A2), mRNA.                       | 0.14  | 8.19 | 3.93E-14 | 1.24E-13 | cyan |
| COX7B   | 1349   | cytochrome c oxidase subunit VIIb (COX7B), nuclear gene encoding mitochondrial protein, mRNA. | 0.02  | 9.22 | 3.01E-01 | 3.45E-01 | cyan |

|         |       |                                                                                                                    |       |       |          |          |      |
|---------|-------|--------------------------------------------------------------------------------------------------------------------|-------|-------|----------|----------|------|
| COX7C   | 1350  | cytochrome c oxidase subunit VIIc (COX7C), nuclear gene encoding mitochondrial protein, mRNA.                      | -0.01 | 6.79  | 3.94E-01 | 4.39E-01 | cyan |
| CSTF3   | 1479  | cleavage stimulation factor, 3' pre-RNA, subunit 3, 77kDa (CSTF3), transcript variant 2, mRNA.                     | 0.08  | 8.16  | 1.29E-05 | 2.43E-05 | cyan |
| DDX23   | 9416  | DEAD (Asp-Glu-Ala-Asp) box polypeptide 23 (DDX23), mRNA.                                                           | 0.02  | 5.54  | 1.31E-01 | 1.61E-01 | cyan |
| DPY30   | 84661 | dpy-30-like protein (LOC84661), mRNA.                                                                              | 0.21  | 8.05  | 5.02E-52 | 8.52E-51 | cyan |
| EEF2    | 1938  | eukaryotic translation elongation factor 2 (EEF2), mRNA.                                                           | -0.06 | 10.04 | 2.93E-05 | 5.37E-05 | cyan |
| ENO1    | 2023  | enolase 1, (alpha) (ENO1), mRNA.                                                                                   | 0.10  | 7.81  | 3.44E-11 | 9.22E-11 | cyan |
| ERH     | 2079  | enhancer of rudimentary homolog (Drosophila) (ERH), mRNA.                                                          | -0.02 | 7.87  | 1.07E-01 | 1.33E-01 | cyan |
| FAM217B | 63939 | chromosome 20 open reading frame 177 (C20orf177), mRNA.                                                            | 0.10  | 8.75  | 6.86E-09 | 1.62E-08 | cyan |
| GCDH    | 2639  | glutaryl-Coenzyme A dehydrogenase (GCDH), nuclear gene encoding mitochondrial protein, transcript variant 1, mRNA. | 0.04  | 9.04  | 1.32E-03 | 2.06E-03 | cyan |
| GEMIN6  | 79833 | gem (nuclear organelle) associated protein 6 (GEMIN6), mRNA.                                                       | -0.13 | 8.58  | 5.23E-12 | 1.47E-11 | cyan |
| GOLIM4  | 27333 | golgi phosphoprotein 4 (GOLPH4), mRNA.                                                                             | -0.02 | 8.00  | 3.26E-01 | 3.71E-01 | cyan |



|          |        |                                                                                          |       |       |          |          |      |
|----------|--------|------------------------------------------------------------------------------------------|-------|-------|----------|----------|------|
| GTF2H5   | 404672 | general transcription factor IIH, polypeptide 5 (GTF2H5), mRNA.                          | 0.08  | 7.16  | 4.19E-05 | 7.54E-05 | cyan |
| HCLS1    | 3059   | hematopoietic cell-specific Lyn substrate 1 (HCLS1), mRNA.                               | -0.09 | 7.57  | 4.85E-07 | 1.01E-06 | cyan |
| HINT1    | 3094   | histidine triad nucleotide binding protein 1 (HINT1), mRNA.                              | -0.01 | 7.36  | 6.82E-01 | 7.17E-01 | cyan |
| HIST1H4C | 8364   | histone cluster 1, H4c (HIST1H4C), mRNA.                                                 | -0.16 | 8.42  | 4.34E-15 | 1.44E-14 | cyan |
| HLA-B    | 3106   | major histocompatibility complex, class I, B (HLA-B), mRNA.                              | -0.14 | 8.24  | 2.79E-13 | 8.45E-13 | cyan |
| HNRNPUL1 | 11100  | heterogeneous nuclear ribonucleoprotein U-like 1 (HNRNPUL1), transcript variant 1, mRNA. | -0.07 | 8.97  | 1.08E-08 | 2.52E-08 | cyan |
| IMMP1L   | 196294 | IMP1 inner mitochondrial membrane peptidase-like (S. cerevisiae) (IMMP1L), mRNA.         | 0.05  | 8.11  | 5.36E-04 | 8.74E-04 | cyan |
| IMPDH2   | 3615   | IMP (inosine monophosphate) dehydrogenase 2 (IMPDH2), mRNA.                              | -0.09 | 7.97  | 1.69E-12 | 4.89E-12 | cyan |
| INO80C   | 125476 | chromosome 18 open reading frame 37 (C18orf37), mRNA.                                    | -0.08 | 7.53  | 1.55E-06 | 3.11E-06 | cyan |
| INPP4B   | 8821   | inositol polyphosphate-4-phosphatase, type II, 105kDa (INPP4B), mRNA.                    | 0.05  | 10.11 | 1.47E-02 | 2.04E-02 | cyan |

|          |        |                                                                                                                        |       |      |          |          |      |
|----------|--------|------------------------------------------------------------------------------------------------------------------------|-------|------|----------|----------|------|
| KIAA0101 | 9768   | KIAA0101 (KIAA0101), transcript variant 1, mRNA.                                                                       | -0.39 | 7.70 | 2.94E-44 | 3.60E-43 | cyan |
| LSM3     | 27258  | LSM3 homolog, U6 small nuclear RNA associated ( <i>S. cerevisiae</i> ) (LSM3), mRNA.                                   | 0.11  | 6.85 | 7.40E-09 | 1.74E-08 | cyan |
| LY96     | 23643  | lymphocyte antigen 96 (LY96), mRNA.                                                                                    | 0.07  | 8.87 | 1.20E-07 | 2.62E-07 | cyan |
| LYPLAL1  | 127018 | lysophospholipase-like 1 (LYPLAL1), mRNA.                                                                              | 0.21  | 7.05 | 8.73E-23 | 4.26E-22 | cyan |
| LYRM2    | 57226  | LYR motif containing 2 (LYRM2), mRNA.                                                                                  | 0.12  | 7.81 | 2.02E-13 | 6.14E-13 | cyan |
| MAGOH    | 4116   | mago-nashi homolog, proliferation-associated ( <i>Drosophila</i> ) (MAGOH), mRNA.                                      | 0.00  | 7.86 | 9.37E-01 | 9.47E-01 | cyan |
| MELK     | 9833   | maternal embryonic leucine zipper kinase (MELK), mRNA.                                                                 | 0.06  | 9.24 | 2.41E-06 | 4.79E-06 | cyan |
| MOB4     | 25843  | preimplantation protein 3 (PREI3), transcript variant 1, mRNA.                                                         | -0.28 | 7.42 | 8.18E-42 | 8.95E-41 | cyan |
| MRPL22   | 29093  | mitochondrial ribosomal protein L22 (MRPL22), nuclear gene encoding mitochondrial protein, transcript variant 1, mRNA. | 0.29  | 6.75 | 2.87E-44 | 3.54E-43 | cyan |
| MRPL33   | 9553   | mitochondrial ribosomal protein L33 (MRPL33), nuclear gene encoding mitochondrial protein, transcript variant 2, mRNA. | -0.14 | 6.00 | 2.25E-12 | 6.44E-12 | cyan |

|         |       |                                                                                                                        |       |       |          |          |      |
|---------|-------|------------------------------------------------------------------------------------------------------------------------|-------|-------|----------|----------|------|
| MRPL40  | 64976 | mitochondrial ribosomal protein L40 (MRPL40), nuclear gene encoding mitochondrial protein, mRNA.                       | -0.13 | 7.10  | 1.57E-20 | 6.88E-20 | cyan |
| MRPL48  | 51642 | mitochondrial ribosomal protein L48 (MRPL48), nuclear gene encoding mitochondrial protein, mRNA.                       | 0.03  | 11.35 | 4.59E-02 | 6.01E-02 | cyan |
| MRPS17  | 51373 | mitochondrial ribosomal protein S17 (MRPS17), nuclear gene encoding mitochondrial protein, mRNA.                       | 0.01  | 8.46  | 6.05E-01 | 6.46E-01 | cyan |
| MRPS18C | 51023 | mitochondrial ribosomal protein S18C (MRPS18C), nuclear gene encoding mitochondrial protein, mRNA.                     | 0.40  | 7.78  | 3.11E-55 | 6.29E-54 | cyan |
| MRPS21  | 54460 | mitochondrial ribosomal protein S21 (MRPS21), nuclear gene encoding mitochondrial protein, transcript variant 1, mRNA. | -0.50 | 7.56  | 3.76E-63 | 1.24E-61 | cyan |
| MRPS33  | 51650 | mitochondrial ribosomal protein S33 (MRPS33), nuclear gene encoding mitochondrial protein, transcript variant 2, mRNA. | -0.06 | 7.78  | 6.79E-05 | 1.20E-04 | cyan |
| NA      | 56617 | small EDRK-rich factor 1B (centromeric) (SERF1B), mRNA.                                                                | -0.40 | 7.80  | 1.42E-67 | 5.62E-66 | cyan |

|         |       |                                                                                                                                                  |       |       |          |          |      |
|---------|-------|--------------------------------------------------------------------------------------------------------------------------------------------------|-------|-------|----------|----------|------|
| NA      | 514   | ATP synthase, H <sup>+</sup> transporting, mitochondrial F1 complex, epsilon subunit (ATP5E), nuclear gene encoding mitochondrial protein, mRNA. | -0.05 | 7.73  | 2.13E-03 | 3.25E-03 | cyan |
| NA      | 6161  | ribosomal protein L32 (RPL32), transcript variant 3, mRNA.                                                                                       | -0.04 | 8.28  | 2.25E-02 | 3.07E-02 | cyan |
| NA      | 4738  | neural precursor cell expressed, developmentally down-regulated 8 (NEDD8), mRNA.                                                                 | -0.03 | 7.69  | 1.56E-01 | 1.89E-01 | cyan |
| NDUFA1  | 4694  | NADH dehydrogenase (ubiquinone) 1 alpha subcomplex, 1, 7.5kDa (NDUFA1), nuclear gene encoding mitochondrial protein, mRNA.                       | -0.03 | 7.11  | 1.33E-01 | 1.63E-01 | cyan |
| NDUFA4  | 4697  | NADH dehydrogenase (ubiquinone) 1 alpha subcomplex, 4, 9kDa (NDUFA4), nuclear gene encoding mitochondrial protein, mRNA.                         | 0.04  | 11.96 | 7.72E-04 | 1.24E-03 | cyan |
| NDUFAF2 | 91942 | NDUFA12-like (NDUFA12L), mRNA.                                                                                                                   | -0.19 | 8.22  | 7.94E-23 | 3.89E-22 | cyan |
| NDUFB3  | 4709  | NADH dehydrogenase (ubiquinone) 1 beta subcomplex, 3, 12kDa (NDUFB3), mRNA.                                                                      | 0.11  | 6.66  | 5.81E-09 | 1.38E-08 | cyan |

|        |        |                                                                                                    |       |      |          |          |      |
|--------|--------|----------------------------------------------------------------------------------------------------|-------|------|----------|----------|------|
| NDUFS4 | 4724   | NADH dehydrogenase (ubiquinone) Fe-S protein 4, 18kDa (NADH-coenzyme Q reductase) (NDUFS4), mRNA.  | 0.00  | 9.64 | 8.74E-01 | 8.94E-01 | cyan |
| NDUFS5 | 4725   | NADH dehydrogenase (ubiquinone) Fe-S protein 5, 15kDa (NADH-coenzyme Q reductase) (NDUFS5), mRNA.  | 0.02  | 9.77 | 5.52E-02 | 7.16E-02 | cyan |
| NELFCD | 51497  | TH1-like (Drosophila) (TH1L), transcript variant 1, mRNA.                                          | -0.23 | 8.54 | 4.50E-43 | 5.26E-42 | cyan |
| NHP2L1 | 4809   | NHP2 non-histone chromosome protein 2-like 1 (S. cerevisiae) (NHP2L1), transcript variant 2, mRNA. | 0.13  | 7.29 | 1.59E-15 | 5.42E-15 | cyan |
| NIT2   | 56954  | nitrilase family, member 2 (NIT2), mRNA.                                                           | -0.21 | 6.95 | 1.03E-28 | 6.44E-28 | cyan |
| PABPC1 | 26986  | poly(A) binding protein, cytoplasmic 1 (PABPC1), mRNA.                                             | 0.05  | 8.56 | 5.30E-03 | 7.77E-03 | cyan |
| PFDN5  | 5204   | prefoldin subunit 5 (PFDN5), transcript variant 1, mRNA.                                           | -0.04 | 7.90 | 1.74E-03 | 2.69E-03 | cyan |
| POLR2H | 5437   | polymerase (RNA) II (DNA directed) polypeptide H (POLR2H), mRNA.                                   | 0.17  | 8.93 | 2.09E-19 | 8.67E-19 | cyan |
| PTRHD1 | 391356 | similar to CG14903-PA (LOC391356), mRNA.                                                           | -0.10 | 9.71 | 1.65E-17 | 6.27E-17 | cyan |
| RBX1   | 9978   | ring-box 1 (RBX1), mRNA.                                                                           | 0.16  | 9.65 | 5.54E-39 | 5.33E-38 | cyan |
| RPL26  | 6154   | ribosomal protein L26 (RPL26), mRNA.                                                               | 0.10  | 7.25 | 2.55E-06 | 5.05E-06 | cyan |

|         |       |                                                            |       |       |          |          |      |
|---------|-------|------------------------------------------------------------|-------|-------|----------|----------|------|
| RPL26L1 | 51121 | ribosomal protein L26-like 1 (RPL26L1), mRNA.              | 0.03  | 8.26  | 5.92E-02 | 7.64E-02 | cyan |
| RPL30   | 6156  | ribosomal protein L30 (RPL30), mRNA.                       | -0.05 | 7.75  | 1.43E-03 | 2.22E-03 | cyan |
| RPL31   | 6160  | ribosomal protein L31 (RPL31), mRNA.                       | 0.06  | 7.72  | 1.40E-03 | 2.18E-03 | cyan |
| RPL34   | 6164  | ribosomal protein L34 (RPL34), transcript variant 2, mRNA. | 0.04  | 6.69  | 4.67E-02 | 6.11E-02 | cyan |
| RPL35A  | 6165  | ribosomal protein L35a (RPL35A), mRNA.                     | -0.05 | 7.04  | 2.04E-03 | 3.13E-03 | cyan |
| RPL36AL | 6166  | ribosomal protein L36a-like (RPL36AL), mRNA.               | -0.09 | 10.80 | 4.66E-18 | 1.81E-17 | cyan |
| RPL39   | 6170  | ribosomal protein L39 (RPL39), mRNA.                       | -0.07 | 7.46  | 1.69E-05 | 3.16E-05 | cyan |
| RPL5    | 6125  | ribosomal protein L5 (RPL5), mRNA.                         | 0.09  | 10.89 | 2.03E-07 | 4.34E-07 | cyan |
| RPP40   | 10799 | ribonuclease P 40kDa subunit (RPP40), mRNA.                | 0.00  | 10.75 | 7.93E-01 | 8.19E-01 | cyan |
| RPS13   | 6207  | ribosomal protein S13 (RPS13), mRNA.                       | -0.12 | 8.99  | 6.00E-13 | 1.78E-12 | cyan |
| RPS15   | 6209  | ribosomal protein S15 (RPS15), mRNA.                       | -0.10 | 9.12  | 6.08E-18 | 2.35E-17 | cyan |
| RPS16   | 6217  | ribosomal protein S16 (RPS16), mRNA.                       | 0.61  | 8.24  | 2.29E-88 | 3.98E-86 | cyan |
| RPS17   | 6218  | ribosomal protein S17 (RPS17), mRNA.                       | 0.20  | 8.32  | 2.68E-21 | 1.21E-20 | cyan |
| RPS21   | 6227  | ribosomal protein S21 (RPS21), mRNA.                       | 0.01  | 12.50 | 4.58E-01 | 5.04E-01 | cyan |
| RPS27A  | 6233  | ribosomal protein S27a (RPS27A), mRNA.                     | -0.05 | 7.41  | 1.86E-03 | 2.87E-03 | cyan |

|        |       |                                                                                              |       |      |          |          |      |
|--------|-------|----------------------------------------------------------------------------------------------|-------|------|----------|----------|------|
| RPS27L | 51065 | ribosomal protein S27-like (RPS27L), mRNA.                                                   | 0.11  | 9.66 | 1.30E-10 | 3.38E-10 | cyan |
| RPS7   | 6201  | ribosomal protein S7 (RPS7), mRNA.                                                           | 0.05  | 8.02 | 6.58E-04 | 1.06E-03 | cyan |
| RPS8   | 6202  | ribosomal protein S8 (RPS8), mRNA.                                                           | 0.49  | 7.60 | 3.48E-61 | 1.02E-59 | cyan |
| SEC61G | 23480 | Sec61 gamma subunit (SEC61G), transcript variant 2, mRNA.                                    | 0.02  | 8.07 | 1.73E-01 | 2.07E-01 | cyan |
| SF3B6  | 51639 | splicing factor 3B, 14 kDa subunit (SF3B14), mRNA.                                           | -0.15 | 6.92 | 4.18E-13 | 1.25E-12 | cyan |
| SHFM1  | 7979  | split hand/foot malformation (ectrodactyly) type 1 (SHFM1), mRNA.                            | 0.02  | 6.08 | 3.04E-01 | 3.48E-01 | cyan |
| SLIRP  | 81892 | chromosome 14 open reading frame 156 (C14orf156), mRNA.                                      | 0.31  | 9.01 | 2.64E-46 | 3.63E-45 | cyan |
| SNRPB2 | 6629  | small nuclear ribonucleoprotein polypeptide B" (SNRPB2), transcript variant 1, mRNA.         | 0.05  | 6.24 | 2.82E-02 | 3.79E-02 | cyan |
| SNRPD2 | 6633  | small nuclear ribonucleoprotein D2 polypeptide 16.5kDa (SNRPD2), transcript variant 1, mRNA. | -0.13 | 8.85 | 1.38E-25 | 7.70E-25 | cyan |
| SNRPF  | 6636  | small nuclear ribonucleoprotein polypeptide F (SNRPF), mRNA.                                 | 0.23  | 7.46 | 7.26E-26 | 4.07E-25 | cyan |
| STX8   | 9482  | syntaxin 8 (STX8), mRNA.                                                                     | -0.04 | 8.78 | 1.11E-03 | 1.75E-03 | cyan |
| TCEB1  | 6921  | transcription elongation factor B (SIII), polypeptide 1 (15kDa, elongin C) (TCEB1), mRNA.    | 0.09  | 9.97 | 9.17E-13 | 2.69E-12 | cyan |

|         |       |                                                                                                                             |       |       |          |          |      |
|---------|-------|-----------------------------------------------------------------------------------------------------------------------------|-------|-------|----------|----------|------|
| TKT     | 7086  | transketolase (Wernicke-Korsakoff syndrome) (TKT), mRNA.                                                                    | -0.08 | 9.44  | 1.42E-05 | 2.66E-05 | cyan |
| TMBIM4  | 51643 | transmembrane BAX inhibitor motif containing 4 (TMBIM4), mRNA.                                                              | 0.46  | 8.34  | 6.43E-42 | 7.10E-41 | cyan |
| TMEM258 | 746   | chromosome 11 open reading frame 10 (C11orf10), mRNA.                                                                       | -0.02 | 7.27  | 1.68E-01 | 2.02E-01 | cyan |
| TNIK    | 23043 | TRAF2 and NCK interacting kinase (TNIK), mRNA.                                                                              | -0.14 | 7.09  | 1.59E-20 | 6.96E-20 | cyan |
| TOMM22  | 56993 | translocase of outer mitochondrial membrane 22 homolog (yeast) (TOMM22), nuclear gene encoding mitochondrial protein, mRNA. | 0.11  | 10.48 | 6.75E-10 | 1.68E-09 | cyan |
| TOMM6   | 29964 | chromosome 6 open reading frame 49 (C6orf49), mRNA.                                                                         | -0.15 | 8.41  | 3.43E-16 | 1.21E-15 | cyan |
| TOMM7   | 54543 | translocase of outer mitochondrial membrane 7 homolog (yeast) (TOMM7), mRNA.                                                | -0.17 | 6.57  | 1.73E-30 | 1.13E-29 | cyan |
| TPRKB   | 51002 | TP53RK binding protein (TPRKB), mRNA.                                                                                       | 0.13  | 8.29  | 7.14E-19 | 2.89E-18 | cyan |
| TXN     | 7295  | thioredoxin (TXN), mRNA.                                                                                                    | -0.21 | 8.75  | 1.56E-24 | 8.27E-24 | cyan |
| UQCRB   | 7381  | ubiquinol-cytochrome c reductase binding protein (UQCRB), mRNA.                                                             | 0.04  | 7.17  | 3.66E-03 | 5.46E-03 | cyan |
| VPS29   | 51699 | vacuolar protein sorting 29 (yeast) (VPS29), transcript variant 1, mRNA.                                                    | 0.11  | 10.06 | 8.00E-13 | 2.36E-12 | cyan |



|         |        |                                                                                                                                             |       |      |          |          |       |
|---------|--------|---------------------------------------------------------------------------------------------------------------------------------------------|-------|------|----------|----------|-------|
| ZBTB43  | 23099  | zinc finger and BTB domain containing 43 (ZBTB43), mRNA.                                                                                    | 0.06  | 6.30 | 2.32E-06 | 4.61E-06 | cyan  |
| ZNF585A | 199704 | zinc finger protein 585A (ZNF585A), transcript variant 1, mRNA.                                                                             | -0.04 | 8.02 | 9.37E-03 | 1.34E-02 | cyan  |
| MARCH7  | 64844  | membrane-associated ring finger (C3HC4) 7 (MARCH7), mRNA.                                                                                   | -0.11 | 9.98 | 3.80E-09 | 9.11E-09 | green |
| SEPT7   | 989    | septin 7 (SEPT7), transcript variant 2, mRNA.                                                                                               | -0.07 | 5.84 | 1.08E-06 | 2.19E-06 | green |
| SEPT11  | 55752  | septin 11 (SEPT11), mRNA.                                                                                                                   | 0.02  | 7.00 | 1.97E-01 | 2.35E-01 | green |
| SEP15   | 9403   | 15 kDa selenoprotein (SEP15), transcript variant 2, mRNA.                                                                                   | -0.09 | 7.90 | 7.90E-13 | 2.33E-12 | green |
| ABCA5   | 23461  | ATP-binding cassette, sub-family A (ABC1), member 5 (ABCA5), transcript variant 2, mRNA.                                                    | -0.02 | 7.75 | 1.31E-01 | 1.61E-01 | green |
| ABCE1   | 6059   | ATP-binding cassette, sub-family E (OABP), member 1 (ABCE1), transcript variant 1, mRNA.                                                    | 0.20  | 9.29 | 1.56E-27 | 9.36E-27 | green |
| ABHD17B | 51104  | chromosome 9 open reading frame 77 (C9orf77), transcript variant 2, mRNA.                                                                   | 0.02  | 8.94 | 1.55E-01 | 1.88E-01 | green |
| ACAA1   | 30     | acetyl-Coenzyme A acyltransferase 1 (peroxisomal 3-oxoacyl-Coenzyme A thiolase) (ACAA1), nuclear gene encoding mitochondrial protein, mRNA. | -0.06 | 5.98 | 3.60E-05 | 6.52E-05 | green |

|        |       |                                                                                                                                   |       |      |          |          |       |
|--------|-------|-----------------------------------------------------------------------------------------------------------------------------------|-------|------|----------|----------|-------|
| ACADVL | 37    | acyl-Coenzyme A dehydrogenase, very long chain (ACADVL), nuclear gene encoding mitochondrial protein, transcript variant 2, mRNA. | 0.01  | 7.79 | 6.37E-01 | 6.76E-01 | green |
| ACSL1  | 2180  | acyl-CoA synthetase long-chain family member 1 (ACSL1), mRNA.                                                                     | -0.19 | 8.07 | 8.40E-22 | 3.89E-21 | green |
| ACTR3  | 10096 | ARP3 actin-related protein 3 homolog (yeast) (ACTR3), mRNA.                                                                       | 0.53  | 7.25 | 2.71E-58 | 6.71E-57 | green |
| ADNP   | 23394 | activity-dependent neuroprotector (ADNP), transcript variant 2, mRNA.                                                             | 0.66  | 5.96 | 2.92E-56 | 6.31E-55 | green |
| AFTPH  | 54812 | aftiphilin (AFTPH), transcript variant 3, mRNA.                                                                                   | -0.02 | 7.23 | 3.48E-01 | 3.93E-01 | green |
| AGPAT5 | 55326 | 1-acylglycerol-3-phosphate O-acyltransferase 5 (lysophosphatidic acid acyltransferase, epsilon) (AGPAT5), mRNA.                   | 0.04  | 7.50 | 1.58E-02 | 2.20E-02 | green |
| AHCTF1 | 25909 | AT hook containing transcription factor 1 (AHCTF1), mRNA.                                                                         | 0.00  | 9.55 | 7.42E-01 | 7.73E-01 | green |
| ALG5   | 29880 | asparagine-linked glycosylation 5 homolog (S. cerevisiae, dolichyl-phosphate beta-glucosyltransferase) (ALG5), mRNA.              | -0.38 | 6.45 | 2.90E-42 | 3.28E-41 | green |
| ANXA4  | 307   | annexin A4 (ANXA4), mRNA.                                                                                                         | 0.15  | 9.25 | 4.41E-11 | 1.18E-10 | green |

|         |        |                                                                                                                               |       |      |          |          |       |
|---------|--------|-------------------------------------------------------------------------------------------------------------------------------|-------|------|----------|----------|-------|
| AP1AR   | 55435  | chromosome 4 open reading frame 16 (C4orf16), mRNA.                                                                           | -0.04 | 5.63 | 2.70E-03 | 4.07E-03 | green |
| ARL8B   | 55207  | ADP-ribosylation factor-like 8B (ARL8B), mRNA.                                                                                | -0.05 | 8.69 | 1.10E-03 | 1.74E-03 | green |
| ARMC1   | 55156  | armadillo repeat containing 1 (ARMC1), mRNA.                                                                                  | 0.11  | 7.44 | 3.38E-08 | 7.59E-08 | green |
| ASUN    | 55726  | chromosome 12 open reading frame 11 (C12orf11), mRNA.                                                                         | 0.08  | 7.92 | 5.65E-08 | 1.25E-07 | green |
| ATF4    | 468    | activating transcription factor 4 (tax-responsive enhancer element B67) (ATF4), transcript variant 1, mRNA.                   | -0.23 | 9.38 | 3.87E-32 | 2.76E-31 | green |
| AVEN    | 57099  | apoptosis, caspase activation inhibitor (AVEN), mRNA.                                                                         | -0.11 | 7.97 | 2.86E-11 | 7.72E-11 | green |
| BAZ2B   | 29994  | bromodomain adjacent to zinc finger domain, 2B (BAZ2B), mRNA.                                                                 | -0.09 | 6.30 | 1.94E-08 | 4.43E-08 | green |
| BTAF1   | 9044   | BTAF1 RNA polymerase II, B-TFIID transcription factor-associated, 170kDa (Mot1 homolog, <i>S. cerevisiae</i> ) (BTAF1), mRNA. | -0.02 | 8.58 | 2.43E-01 | 2.84E-01 | green |
| C2orf76 | 130355 | hypothetical protein LOC130355 (LOC130355), mRNA.                                                                             | 0.07  | 6.57 | 3.50E-07 | 7.35E-07 | green |
| CAMSAP2 | 23271  | calmodulin regulated spectrin-associated protein 1-like 1 (CAMSAP1L1), mRNA.                                                  | 0.02  | 7.99 | 2.67E-01 | 3.09E-01 | green |

|        |        |                                                                                   |       |       |          |          |       |
|--------|--------|-----------------------------------------------------------------------------------|-------|-------|----------|----------|-------|
| CAPZA1 | 829    | capping protein (actin filament) muscle Z-line, alpha 1 (CAPZA1), mRNA.           | -0.01 | 5.97  | 5.66E-01 | 6.10E-01 | green |
| CCAR1  | 55749  | cell division cycle and apoptosis regulator 1 (CCAR1), mRNA.                      | 0.06  | 7.24  | 2.28E-04 | 3.85E-04 | green |
| CCBL2  | 56267  | cysteine conjugate-beta lyase 2 (CCBL2), transcript variant 2, mRNA.              | -0.03 | 9.07  | 7.64E-02 | 9.72E-02 | green |
| CCDC50 | 152137 | coiled-coil domain containing 50 (CCDC50), transcript variant 1, mRNA.            | 0.08  | 7.19  | 2.89E-05 | 5.29E-05 | green |
| CCNB1  | 891    | cyclin B1 (CCNB1), mRNA.                                                          | -0.11 | 6.75  | 1.73E-10 | 4.47E-10 | green |
| CCNG1  | 900    | cyclin G1 (CCNG1), transcript variant 1, mRNA.                                    | 0.16  | 6.70  | 1.09E-16 | 3.98E-16 | green |
| CCP110 | 9738   | CP110 protein (CP110), mRNA.                                                      | 0.02  | 10.13 | 3.68E-02 | 4.88E-02 | green |
| CCT3   | 7203   | chaperonin containing TCP1, subunit 3 (gamma) (CCT3), transcript variant 2, mRNA. | -0.83 | 7.82  | 1.71E-89 | 3.21E-87 | green |
| CD164  | 8763   | CD164 molecule, sialomucin (CD164), mRNA.                                         | 0.02  | 7.14  | 1.30E-01 | 1.60E-01 | green |
| CD58   | 965    | CD58 molecule (CD58), mRNA.                                                       | -0.03 | 6.20  | 1.46E-01 | 1.78E-01 | green |
| CDC5L  | 988    | CDC5 cell division cycle 5-like (S. pombe) (CDC5L), mRNA.                         | 0.73  | 9.25  | 1.44E-79 | 1.28E-77 | green |
| CDC7   | 8317   | cell division cycle 7 homolog (S. cerevisiae) (CDC7), mRNA.                       | 0.05  | 6.68  | 8.06E-05 | 1.42E-04 | green |

|         |        |                                                                                |       |      |          |          |       |
|---------|--------|--------------------------------------------------------------------------------|-------|------|----------|----------|-------|
| CDK1    | 983    | cell division cycle 2, G1 to S and G2 to M (CDC2), transcript variant 1, mRNA. | -0.10 | 8.12 | 2.99E-11 | 8.05E-11 | green |
| CEBPZ   | 10153  | CCAAT/enhancer binding protein zeta (CEBPZ), mRNA.                             | 0.04  | 8.96 | 1.28E-04 | 2.22E-04 | green |
| CENPJ   | 55835  | centromere protein J (CENPJ), mRNA.                                            | -0.25 | 8.88 | 1.42E-46 | 1.98E-45 | green |
| CENPQ   | 55166  | centromere protein Q (CENPQ), mRNA.                                            | -0.28 | 9.81 | 3.14E-34 | 2.42E-33 | green |
| CENPW   | 387103 | chromosome 6 open reading frame 173 (C6orf173), mRNA.                          | -0.05 | 6.97 | 8.91E-03 | 1.28E-02 | green |
| CHAC2   | 494143 | ChaC, cation transport regulator homolog 2 (E. coli) (CHAC2), mRNA.            | 0.24  | 5.97 | 3.40E-33 | 2.51E-32 | green |
| CHD1    | 1105   | chromodomain helicase DNA binding protein 1 (CHD1), mRNA.                      | -0.73 | 8.48 | 5.43E-70 | 2.48E-68 | green |
| CHMP2B  | 25978  | chromatin modifying protein 2B (CHMP2B), mRNA.                                 | -0.19 | 7.13 | 1.85E-22 | 8.79E-22 | green |
| CISD1   | 55847  | zinc finger, CDGSH-type domain 1 (ZCD1), mRNA.                                 | -0.06 | 8.44 | 5.71E-03 | 8.34E-03 | green |
| CLIC4   | 25932  | chloride intracellular channel 4 (CLIC4), mRNA.                                | -0.25 | 8.26 | 2.14E-32 | 1.55E-31 | green |
| CLTC    | 1213   | clathrin, heavy chain (Hc) (CLTC), mRNA.                                       | -0.05 | 7.94 | 2.17E-03 | 3.31E-03 | green |
| CMPK1   | 51727  | cytidylate kinase (CMPK), mRNA.                                                | -0.06 | 7.56 | 3.25E-05 | 5.92E-05 | green |
| COMMD10 | 51397  | COMM domain containing 10 (COMMD10), mRNA.                                     | 0.06  | 8.00 | 1.32E-02 | 1.85E-02 | green |

|         |        |                                                                                   |       |      |          |          |       |
|---------|--------|-----------------------------------------------------------------------------------|-------|------|----------|----------|-------|
| COPS2   | 9318   | COP9 constitutive photomorphogenic homolog subunit 2 (Arabidopsis) (COPS2), mRNA. | 0.46  | 8.62 | 5.44E-63 | 1.77E-61 | green |
| CTNNA1  | 1495   | catenin (cadherin-associated protein), alpha 1, 102kDa (CTNNA1), mRNA.            | -0.01 | 5.57 | 6.08E-01 | 6.49E-01 | green |
| CTSO    | 1519   | cathepsin O (CTSO), mRNA.                                                         | -0.03 | 7.49 | 2.19E-02 | 2.99E-02 | green |
| CTTN    | 2017   | cortactin (CTTN), transcript variant 1, mRNA.                                     | -0.05 | 8.43 | 1.44E-04 | 2.47E-04 | green |
| CWF19L2 | 143884 | CWF19-like 2, cell cycle control (S. pombe) (CWF19L2), mRNA.                      | -0.19 | 7.70 | 1.13E-36 | 9.80E-36 | green |
| CYB5R4  | 51167  | cytochrome b5 reductase 4 (CYB5R4), mRNA.                                         | 0.13  | 9.86 | 5.46E-20 | 2.34E-19 | green |
| CYP51A1 | 1595   | cytochrome P450, family 51, subfamily A, polypeptide 1 (CYP51A1), mRNA.           | -0.29 | 6.52 | 5.95E-42 | 6.59E-41 | green |
| DCAF13  | 25879  | WD repeats and SOF1 domain containing (WDSOF1), mRNA.                             | -0.07 | 9.11 | 1.35E-04 | 2.31E-04 | green |
| DCP2    | 167227 | DCP2 decapping enzyme homolog (S. cerevisiae) (DCP2), mRNA.                       | 0.26  | 6.52 | 3.72E-35 | 3.00E-34 | green |
| DCTN4   | 51164  | dynactin 4 (p62) (DCTN4), mRNA.                                                   | 0.06  | 6.68 | 7.42E-05 | 1.31E-04 | green |
| DDX3Y   | 8653   | DEAD (Asp-Glu-Ala-Asp) box polypeptide 3, Y-linked (DDX3Y), mRNA.                 | 0.06  | 7.77 | 3.33E-06 | 6.56E-06 | green |
| DENND6A | 201627 | hypothetical protein FLJ34969 (FLJ34969), mRNA.                                   | 0.09  | 7.85 | 2.67E-10 | 6.83E-10 | green |

|         |        |                                                                                                     |       |      |          |          |       |
|---------|--------|-----------------------------------------------------------------------------------------------------|-------|------|----------|----------|-------|
| DENND6B | 414918 | family with sequence similarity 116, member B (FAM116B), mRNA.                                      | -0.41 | 9.01 | 7.31E-54 | 1.35E-52 | green |
| DLAT    | 1737   | dihydrolipoamide S-acetyltransferase (E2 component of pyruvate dehydrogenase complex) (DLAT), mRNA. | -0.07 | 9.37 | 1.34E-05 | 2.53E-05 | green |
| DLD     | 1738   | dihydrolipoamide dehydrogenase (DLD), mRNA.                                                         | 0.60  | 5.80 | 4.57E-42 | 5.12E-41 | green |
| DMXL1   | 1657   | Dmx-like 1 (DMXL1), mRNA.                                                                           | 0.43  | 6.36 | 1.35E-43 | 1.61E-42 | green |
| DNAAF2  | 55172  | chromosome 14 open reading frame 104 (C14orf104), mRNA.                                             | 0.03  | 9.34 | 2.25E-02 | 3.07E-02 | green |
| DNAJA2  | 10294  | DnaJ (Hsp40) homolog, subfamily A, member 2 (DNAJA2), mRNA.                                         | 0.04  | 7.93 | 2.44E-02 | 3.32E-02 | green |
| DNAJB14 | 79982  | DnaJ (Hsp40) homolog, subfamily B, member 14 (DNAJB14), transcript variant 2, mRNA.                 | 0.66  | 6.71 | 5.52E-78 | 4.12E-76 | green |
| DNM1L   | 10059  | dynamitin 1-like (DNM1L), transcript variant 3, mRNA.                                               | 0.07  | 7.37 | 1.40E-07 | 3.03E-07 | green |
| DOCK10  | 55619  | dedicator of cytokinesis 10 (DOCK10), mRNA.                                                         | -0.14 | 6.23 | 9.50E-14 | 2.94E-13 | green |
| DOCK8   | 81704  | dedicator of cytokinesis 8 (DOCK8), mRNA.                                                           | 0.04  | 8.40 | 2.00E-01 | 2.37E-01 | green |
| DPM2    | 8818   | dolichyl-phosphate mannosyltransferase polypeptide 2, regulatory subunit (DPM2), mRNA.              | -0.09 | 5.44 | 3.36E-06 | 6.61E-06 | green |

|         |        |                                                                                                                |       |       |          |          |       |
|---------|--------|----------------------------------------------------------------------------------------------------------------|-------|-------|----------|----------|-------|
| DR1     | 1810   | down-regulator of transcription 1, TBP-binding (negative cofactor 2) (DR1), mRNA.                              | -0.04 | 10.53 | 3.76E-03 | 5.60E-03 | green |
| EEF2KMT | 196483 | family with sequence similarity 86, member A (FAM86A), transcript variant 1, mRNA.                             | -0.03 | 6.89  | 9.36E-02 | 1.18E-01 | green |
| EIF1AX  | 1964   | eukaryotic translation initiation factor 1A, X-linked (EIF1AX), mRNA.                                          | -0.04 | 8.32  | 1.74E-03 | 2.68E-03 | green |
| EIF3A   | 8661   | eukaryotic translation initiation factor 3, subunit 10 theta, 150/170kDa (EIF3S10), mRNA.                      | -0.09 | 10.98 | 8.18E-12 | 2.27E-11 | green |
| EIF3F   | 83880  | IFP38 (IFP38), mRNA.                                                                                           | -0.14 | 9.08  | 1.50E-13 | 4.58E-13 | green |
| EIF5B   | 9669   | eukaryotic translation initiation factor 5B (EIF5B), mRNA.                                                     | 0.05  | 5.64  | 2.17E-03 | 3.31E-03 | green |
| ELF4    | 2000   | E74-like factor 4 (ets domain transcription factor) (ELF4), mRNA.                                              | 1.02  | 6.20  | 5.07E-87 | 7.57E-85 | green |
| ELOVL5  | 60481  | ELOVL family member 5, elongation of long chain fatty acids (FEN1/Elo2, SUR4/Elo3-like, yeast) (ELOVL5), mRNA. | -0.08 | 10.71 | 1.19E-10 | 3.10E-10 | green |
| EML4    | 27436  | echinoderm microtubule associated protein like 4 (EML4), mRNA.                                                 | -0.08 | 8.86  | 5.72E-09 | 1.36E-08 | green |
| ENOSF1  | 55556  | enolase superfamily member 1 (ENOSF1), mRNA.                                                                   | -0.01 | 9.78  | 5.66E-01 | 6.09E-01 | green |
| ERGIC2  | 51290  | ERGIC and golgi 2 (ERGIC2), mRNA.                                                                              | -0.12 | 9.52  | 1.65E-10 | 4.26E-10 | green |



|         |        |                                                                                                                                                             |       |       |          |          |       |
|---------|--------|-------------------------------------------------------------------------------------------------------------------------------------------------------------|-------|-------|----------|----------|-------|
| ESCO2   | 157570 | establishment of cohesion 1 homolog 2 ( <i>S. cerevisiae</i> ) (ESCO2), mRNA.                                                                               | 0.02  | 6.98  | 2.72E-01 | 3.14E-01 | green |
| EVI2A   | 2123   | ecotropic viral integration site 2A (EVI2A), transcript variant 2, mRNA.                                                                                    | 0.07  | 7.56  | 5.11E-06 | 9.92E-06 | green |
| FABP5   | 387934 | PREDICTED: similar to Fatty acid-binding protein, epidermal (E-FABP) (Psoriasis-associated fatty acid-binding protein homolog) (PA-FABP) (LOC387934), mRNA. | -0.11 | 11.40 | 5.47E-16 | 1.91E-15 | green |
| FAM117B | 150864 | amyotrophic lateral sclerosis 2 (juvenile) chromosome region, candidate 13 (ALS2CR13), mRNA.                                                                | -0.06 | 7.29  | 4.64E-05 | 8.31E-05 | green |
| FAM122B | 159090 | family with sequence similarity 122B (FAM122B), mRNA.                                                                                                       | -0.02 | 8.98  | 2.13E-01 | 2.52E-01 | green |
| FAM162A | 26355  | chromosome 3 open reading frame 28 (C3orf28), mRNA.                                                                                                         | -0.01 | 6.59  | 5.63E-01 | 6.06E-01 | green |
| FAM49B  | 51571  | family with sequence similarity 49, member B (FAM49B), mRNA.                                                                                                | 0.01  | 8.66  | 7.48E-01 | 7.78E-01 | green |
| FAM98A  | 25940  | family with sequence similarity 98, member A (FAM98A), mRNA.                                                                                                | -0.07 | 8.97  | 1.01E-05 | 1.92E-05 | green |
| FANCI   | 55215  | KIAA1794 (KIAA1794), mRNA.                                                                                                                                  | -0.52 | 8.22  | 1.64E-63 | 5.53E-62 | green |

|        |       |                                                                                      |       |       |              |              |       |
|--------|-------|--------------------------------------------------------------------------------------|-------|-------|--------------|--------------|-------|
| FDFT1  | 2222  | farnesyl-diphosphate<br>farnesyltransferase 1 (FDFT1),<br>mRNA.                      | 0.06  | 9.22  | 6.20E-<br>05 | 1.10E-<br>04 | green |
| FH     | 2271  | fumarate hydratase (FH),<br>nuclear gene encoding<br>mitochondrial protein, mRNA.    | -0.10 | 7.74  | 8.57E-<br>09 | 2.00E-<br>08 | green |
| FLI1   | 2313  | Friend leukemia virus<br>integration 1 (FLI1), mRNA.                                 | 0.31  | 7.14  | 2.07E-<br>40 | 2.13E-<br>39 | green |
| FRG1   | 2483  | FSHD region gene 1 (FRG1),<br>mRNA.                                                  | -0.06 | 7.91  | 7.39E-<br>06 | 1.42E-<br>05 | green |
| FYTTD1 | 84248 | forty-two-three domain<br>containing 1 (FYTTD1),<br>transcript variant 2, mRNA.      | 0.20  | 8.32  | 1.57E-<br>34 | 1.23E-<br>33 | green |
| G6PC3  | 92579 | glucose 6 phosphatase,<br>catalytic, 3 (G6PC3), mRNA.                                | -0.01 | 6.94  | 6.58E-<br>01 | 6.96E-<br>01 | green |
| GBAS   | 2631  | glioblastoma amplified<br>sequence (GBAS), mRNA.                                     | 0.02  | 9.50  | 7.82E-<br>02 | 9.94E-<br>02 | green |
| GDI2   | 2665  | GDP dissociation inhibitor 2<br>(GDI2), mRNA.                                        | 0.05  | 8.16  | 1.38E-<br>03 | 2.16E-<br>03 | green |
| GLRX2  | 51022 | glutaredoxin 2 (GLRX2),<br>transcript variant 2, mRNA.                               | -0.13 | 7.90  | 2.50E-<br>24 | 1.31E-<br>23 | green |
| GMNN   | 51053 | geminin, DNA replication<br>inhibitor (GMNN), mRNA.                                  | 0.11  | 7.52  | 1.33E-<br>08 | 3.07E-<br>08 | green |
| GOLT1B | 51026 | golgi transport 1 homolog B (S.<br>cerevisiae) (GOLT1B), mRNA.                       | -0.04 | 10.19 | 1.55E-<br>02 | 2.15E-<br>02 | green |
| GTF2H1 | 2965  | general transcription factor IIH,<br>polypeptide 1 (62kD subunit)<br>(GTF2H1), mRNA. | -0.07 | 6.91  | 3.35E-<br>07 | 7.05E-<br>07 | green |

|          |        |                                                                                                                                                            |       |       |          |          |       |
|----------|--------|------------------------------------------------------------------------------------------------------------------------------------------------------------|-------|-------|----------|----------|-------|
| GTF3C6   | 644563 | PREDICTED: hypothetical LOC644563 (LOC644563), mRNA.                                                                                                       | -0.08 | 10.94 | 7.26E-10 | 1.81E-09 | green |
| HDAC2    | 3066   | histone deacetylase 2 (HDAC2), mRNA.                                                                                                                       | 0.03  | 7.18  | 1.53E-02 | 2.13E-02 | green |
| HLA-DQB1 | 3119   | major histocompatibility complex, class II, DQ beta 1 (HLA-DQB1), mRNA.                                                                                    | -0.23 | 7.44  | 1.12E-47 | 1.66E-46 | green |
| HLA-G    | 3135   | HLA-G histocompatibility antigen, class I, G (HLA-G), mRNA.                                                                                                | -0.44 | 7.24  | 7.95E-59 | 2.10E-57 | green |
| HLTF     | 6596   | helicase-like transcription factor (HLTF), transcript variant 2, mRNA.                                                                                     | -0.18 | 7.42  | 9.87E-31 | 6.54E-30 | green |
| HMGB1    | 731809 | PREDICTED: similar to High mobility group protein B1 (High mobility group protein 1) (HMG-1) (Amphoterin) (Heparin-binding protein p30) (LOC731809), mRNA. | -0.02 | 6.60  | 2.41E-01 | 2.81E-01 | green |
| HMGB1    | 10357  | high-mobility group (nonhistone chromosomal) protein 1-like 1 (HMG1L1), mRNA.                                                                              | 0.01  | 6.55  | 7.53E-01 | 7.83E-01 | green |
| HMGN3    | 9324   | high mobility group nucleosomal binding domain 3 (HMGN3), transcript variant 2, mRNA.                                                                      | 0.08  | 6.21  | 3.17E-06 | 6.24E-06 | green |

|         |       |                                                                                          |       |       |          |          |       |
|---------|-------|------------------------------------------------------------------------------------------|-------|-------|----------|----------|-------|
| HNRNPH3 | 3189  | heterogeneous nuclear ribonucleoprotein H3 (2H9) (HNRPH3), transcript variant 2H9, mRNA. | 1.09  | 5.94  | 5.31E-68 | 2.16E-66 | green |
| HNRNPL  | 3191  | heterogeneous nuclear ribonucleoprotein L (HNRPL), transcript variant 1, mRNA.           | -0.14 | 11.14 | 2.73E-25 | 1.50E-24 | green |
| HSPA4   | 3308  | heat shock 70kDa protein 4 (HSPA4), transcript variant 1, mRNA.                          | -0.06 | 8.88  | 7.90E-06 | 1.51E-05 | green |
| HSPB11  | 51668 | chromosome 1 open reading frame 41 (C1orf41), mRNA.                                      | -0.66 | 6.06  | 5.95E-63 | 1.92E-61 | green |
| IBTK    | 25998 | inhibitor of Bruton agammaglobulinemia tyrosine kinase (IBTK), mRNA.                     | -0.18 | 9.24  | 1.44E-28 | 8.91E-28 | green |
| IER3IP1 | 51124 | immediate early response 3 interacting protein 1 (IER3IP1), mRNA.                        | -0.04 | 8.96  | 8.38E-03 | 1.20E-02 | green |
| IFT74   | 80173 | intraflagellar transport 74 homolog (Chlamydomonas) (IFT74), mRNA.                       | 0.03  | 7.91  | 6.66E-02 | 8.55E-02 | green |
| IMPA1   | 3612  | inositol(myo)-1(or 4)-monophosphatase 1 (IMPA1), mRNA.                                   | 0.08  | 8.45  | 3.02E-03 | 4.54E-03 | green |
| INTS8   | 55656 | integrator complex subunit 8 (INTS8), mRNA.                                              | -0.05 | 5.65  | 3.41E-03 | 5.10E-03 | green |
| ITGB3BP | 23421 | integrin beta 3 binding protein (beta3-endonexin) (ITGB3BP), mRNA.                       | -0.15 | 8.30  | 2.09E-17 | 7.89E-17 | green |

|          |        |                                                                                      |       |      |          |          |       |
|----------|--------|--------------------------------------------------------------------------------------|-------|------|----------|----------|-------|
| KATNA1   | 11104  | katanin p60 (ATPase-containing) subunit A 1 (KATNA1), mRNA.                          | 0.67  | 8.68 | 9.57E-69 | 4.01E-67 | green |
| KBTBD8   | 84541  | kelch repeat and BTB (POZ) domain containing 8 (KBTBD8), mRNA.                       | 0.11  | 6.35 | 1.65E-09 | 4.02E-09 | green |
| KDM3A    | 55818  | jumonji domain containing 1A (JMJD1A), mRNA.                                         | 0.07  | 9.81 | 3.83E-08 | 8.56E-08 | green |
| KHDRBS1  | 10657  | KH domain containing, RNA binding, signal transduction associated 1 (KHDRBS1), mRNA. | -0.40 | 6.45 | 1.75E-70 | 8.09E-69 | green |
| KIAA1033 | 23325  | KIAA1033 (KIAA1033), mRNA.                                                           | -0.03 | 9.50 | 1.13E-01 | 1.41E-01 | green |
| KIAA1524 | 57650  | KIAA1524 (KIAA1524), mRNA.                                                           | -0.08 | 7.11 | 7.28E-07 | 1.49E-06 | green |
| KLC1     | 3831   | kinesin 2 (KNS2), transcript variant 1, mRNA.                                        | 0.55  | 7.57 | 1.95E-69 | 8.60E-68 | green |
| KLHL2    | 11275  | kelch-like 2, Mayven (Drosophila) (KLHL2), mRNA.                                     | -0.11 | 7.76 | 7.22E-14 | 2.26E-13 | green |
| KPNA3    | 3839   | karyopherin alpha 3 (importin alpha 4) (KPNA3), mRNA.                                | -0.10 | 7.50 | 9.73E-12 | 2.70E-11 | green |
| KPNA4    | 3840   | karyopherin alpha 4 (importin alpha 3) (KPNA4), mRNA.                                | -0.25 | 9.06 | 6.99E-42 | 7.69E-41 | green |
| LCLAT1   | 253558 | lysocardiolipin acyltransferase (LYCAT), transcript variant 2, mRNA.                 | 0.09  | 9.07 | 6.99E-12 | 1.95E-11 | green |
| LDHB     | 3945   | lactate dehydrogenase B (LDHB), mRNA.                                                | 0.08  | 6.22 | 7.01E-07 | 1.44E-06 | green |
| LMNB1    | 4001   | lamin B1 (LMNB1), mRNA.                                                              | -0.25 | 6.38 | 1.95E-31 | 1.34E-30 | green |

|        |        |                                                                                                              |       |       |          |          |       |
|--------|--------|--------------------------------------------------------------------------------------------------------------|-------|-------|----------|----------|-------|
| LSM1   | 27257  | LSM1 homolog, U6 small nuclear RNA associated (S. cerevisiae) (LSM1), mRNA.                                  | 0.07  | 6.37  | 3.65E-05 | 6.61E-05 | green |
| LSM4   | 25804  | LSM4 homolog, U6 small nuclear RNA associated (S. cerevisiae) (LSM4), mRNA.                                  | 0.02  | 8.64  | 1.83E-01 | 2.19E-01 | green |
| LSM6   | 11157  | LSM6 homolog, U6 small nuclear RNA associated (S. cerevisiae) (LSM6), mRNA.                                  | 0.24  | 6.03  | 5.98E-29 | 3.74E-28 | green |
| MATR3  | 9782   | matrin 3 (MATR3), transcript variant 2, mRNA.                                                                | 0.00  | 8.90  | 9.59E-01 | 9.65E-01 | green |
| MBNL1  | 4154   | muscleblind-like (Drosophila) (MBNL1), transcript variant 3, mRNA.                                           | -0.01 | 6.39  | 6.71E-01 | 7.08E-01 | green |
| MCTS1  | 28985  | malignant T cell amplified sequence 1 (MCTS1), mRNA.                                                         | -0.04 | 6.65  | 9.12E-04 | 1.45E-03 | green |
| MED1   | 5469   | PPAR binding protein (PPARBP), mRNA.                                                                         | -0.08 | 7.08  | 2.70E-08 | 6.11E-08 | green |
| MED23  | 9439   | cofactor required for Sp1 transcriptional activation, subunit 3, 130kDa (CRSP3), transcript variant 1, mRNA. | -0.16 | 6.57  | 1.80E-18 | 7.13E-18 | green |
| MEX3C  | 51320  | ring finger and KH domain containing 2 (RKHD2), mRNA.                                                        | -0.64 | 6.33  | 9.31E-56 | 1.94E-54 | green |
| MICU2  | 221154 | EF-hand domain family, member A1 (EFHA1), mRNA.                                                              | 0.08  | 10.31 | 2.90E-05 | 5.31E-05 | green |
| MINPP1 | 9562   | multiple inositol polyphosphate histidine phosphatase, 1 (MINPP1), mRNA.                                     | -0.34 | 8.61  | 1.61E-41 | 1.73E-40 | green |

|         |       |                                                                                                                        |       |      |          |          |       |
|---------|-------|------------------------------------------------------------------------------------------------------------------------|-------|------|----------|----------|-------|
| MND1    | 84057 | meiotic nuclear divisions 1 homolog ( <i>S. cerevisiae</i> ) (MND1), mRNA.                                             | -0.23 | 7.78 | 2.76E-32 | 1.98E-31 | green |
| MOB1B   | 92597 | MOB1, Mps One Binder kinase activator-like 1A (yeast) (MOBK1A), mRNA.                                                  | 0.02  | 7.92 | 2.79E-01 | 3.21E-01 | green |
| MORF4L1 | 10933 | mortality factor 4 like 1 (MORF4L1), transcript variant 1, mRNA.                                                       | 0.04  | 6.74 | 4.62E-03 | 6.83E-03 | green |
| MRPL47  | 57129 | mitochondrial ribosomal protein L47 (MRPL47), nuclear gene encoding mitochondrial protein, transcript variant 1, mRNA. | -0.16 | 8.96 | 9.22E-21 | 4.08E-20 | green |
| MRPL51  | 51258 | mitochondrial ribosomal protein L51 (MRPL51), nuclear gene encoding mitochondrial protein, mRNA.                       | 0.06  | 7.18 | 1.91E-04 | 3.24E-04 | green |
| MRPS28  | 28957 | mitochondrial ribosomal protein S28 (MRPS28), nuclear gene encoding mitochondrial protein, mRNA.                       | -0.09 | 8.77 | 5.78E-09 | 1.37E-08 | green |
| MSH2    | 4436  | mutS homolog 2, colon cancer, nonpolyposis type 1 ( <i>E. coli</i> ) (MSH2), mRNA.                                     | 0.09  | 6.61 | 2.00E-05 | 3.71E-05 | green |
| MTF2    | 22823 | metal response element binding transcription factor 2 (MTF2), mRNA.                                                    | 0.05  | 9.05 | 5.14E-06 | 9.96E-06 | green |

|         |        |                                                                                                                     |       |       |          |          |       |
|---------|--------|---------------------------------------------------------------------------------------------------------------------|-------|-------|----------|----------|-------|
| MTMR6   | 9107   | myotubularin related protein 6 (MTMR6), mRNA.                                                                       | -0.11 | 6.19  | 3.54E-09 | 8.50E-09 | green |
| NA      | 221960 | chromosome 7 open reading frame 28B (C7orf28B), mRNA.                                                               | -0.25 | 8.06  | 1.26E-50 | 2.01E-49 | green |
| NA      | 278    | amylase, alpha 1C; salivary (AMY1C), mRNA.                                                                          | 0.36  | 6.41  | 2.89E-44 | 3.56E-43 | green |
| NA      | 51119  | Shwachman-Bodian-Diamond syndrome (SBDS), mRNA.                                                                     | -0.21 | 7.72  | 1.07E-25 | 5.97E-25 | green |
| NA      | 6880   | TAF9 RNA polymerase II, TATA box binding protein (TBP)-associated factor, 32kDa (TAF9), transcript variant 3, mRNA. | 0.04  | 8.94  | 7.83E-02 | 9.94E-02 | green |
| NARS    | 4677   | asparaginyl-tRNA synthetase (NARS), mRNA.                                                                           | 0.08  | 6.26  | 3.40E-06 | 6.68E-06 | green |
| NDC80   | 10403  | NDC80 homolog, kinetochore complex component (S. cerevisiae) (NDC80), mRNA.                                         | 0.18  | 11.13 | 3.24E-42 | 3.65E-41 | green |
| NDUFAF5 | 79133  | chromosome 20 open reading frame 7 (C20orf7), transcript variant 2, mRNA.                                           | 0.00  | 10.31 | 9.06E-01 | 9.21E-01 | green |
| NFE2L2  | 4780   | nuclear factor (erythroid-derived 2)-like 2 (NFE2L2), mRNA.                                                         | 0.02  | 6.25  | 2.33E-01 | 2.73E-01 | green |
| NIN     | 51199  | ninein (GSK3B interacting protein) (NIN), transcript variant 2, mRNA.                                               | -0.07 | 9.84  | 1.34E-07 | 2.90E-07 | green |
| NMD3    | 51068  | NMD3 homolog (S. cerevisiae) (NMD3), mRNA.                                                                          | 0.08  | 6.71  | 4.78E-07 | 9.93E-07 | green |



|        |        |                                                                                                        |       |      |          |          |       |
|--------|--------|--------------------------------------------------------------------------------------------------------|-------|------|----------|----------|-------|
| NPTN   | 27020  | neuroplastin (NPTN), transcript variant beta, mRNA.                                                    | 0.02  | 8.53 | 2.72E-01 | 3.15E-01 | green |
| NQO2   | 4835   | NAD(P)H dehydrogenase, quinone 2 (NQO2), mRNA.                                                         | 0.09  | 9.71 | 1.89E-10 | 4.89E-10 | green |
| NUCKS1 | 64710  | nuclear casein kinase and cyclin-dependent kinase substrate 1 (NUCKS1), mRNA.                          | -0.17 | 7.53 | 2.43E-24 | 1.27E-23 | green |
| NUDCD2 | 134492 | NudC domain containing 2 (NUDCD2), mRNA.                                                               | 0.07  | 8.03 | 8.40E-04 | 1.34E-03 | green |
| NUF2   | 83540  | NUF2, NDC80 kinetochore complex component, homolog (S. cerevisiae) (NUF2), transcript variant 1, mRNA. | -0.54 | 7.68 | 2.19E-54 | 4.22E-53 | green |
| NUP54  | 53371  | nucleoporin 54kDa (NUP54), mRNA.                                                                       | -0.03 | 7.93 | 2.88E-02 | 3.86E-02 | green |
| NXT2   | 55916  | nuclear transport factor 2-like export factor 2 (NXT2), mRNA.                                          | -0.03 | 6.35 | 1.41E-01 | 1.71E-01 | green |
| OFD1   | 8481   | oral-facial-digital syndrome 1 (OFD1), mRNA.                                                           | -0.02 | 8.13 | 1.46E-01 | 1.77E-01 | green |
| OGFOD1 | 55239  | 2-oxoglutarate and iron-dependent oxygenase domain containing 1 (OGFOD1), mRNA.                        | -0.17 | 9.76 | 8.83E-27 | 5.14E-26 | green |
| ORC3   | 23595  | origin recognition complex, subunit 3-like (yeast) (ORC3L), transcript variant 1, mRNA.                | -0.02 | 7.95 | 1.39E-01 | 1.69E-01 | green |
| OSBPL8 | 114882 | oxysterol binding protein-like 8 (OSBPL8), transcript variant 2, mRNA.                                 | -0.03 | 7.18 | 1.17E-01 | 1.45E-01 | green |

|         |        |                                                                                                |       |       |          |          |       |
|---------|--------|------------------------------------------------------------------------------------------------|-------|-------|----------|----------|-------|
| PAPOLA  | 10914  | poly(A) polymerase alpha (PAPOLA), mRNA.                                                       | -0.01 | 7.34  | 4.02E-01 | 4.47E-01 | green |
| PARPBP  | 55010  | chromosome 12 open reading frame 48 (C12orf48), mRNA.                                          | 0.07  | 8.37  | 4.27E-07 | 8.93E-07 | green |
| PBDC1   | 51260  | chromosome X open reading frame 26 (CXorf26), mRNA.                                            | -0.04 | 7.60  | 1.66E-02 | 2.30E-02 | green |
| PCM1    | 5108   | pericentriolar material 1 (PCM1), mRNA.                                                        | 0.15  | 10.83 | 8.18E-19 | 3.29E-18 | green |
| PCNA    | 5111   | proliferating cell nuclear antigen (PCNA), transcript variant 1, mRNA.                         | -0.18 | 5.68  | 7.51E-17 | 2.76E-16 | green |
| PEX3    | 8504   | peroxisomal biogenesis factor 3 (PEX3), mRNA.                                                  | -0.14 | 7.63  | 7.91E-14 | 2.46E-13 | green |
| PHIP    | 55023  | pleckstrin homology domain interacting protein (PHIP), mRNA.                                   | -0.02 | 6.33  | 1.97E-01 | 2.34E-01 | green |
| PHTF2   | 57157  | putative homeodomain transcription factor 2 (PHTF2), mRNA.                                     | -0.14 | 7.49  | 2.69E-15 | 9.04E-15 | green |
| PIK3AP1 | 118788 | phosphoinositide-3-kinase adaptor protein 1 (PIK3AP1), mRNA.                                   | 0.62  | 9.97  | 7.98E-81 | 7.64E-79 | green |
| PKIA    | 5569   | protein kinase (cAMP-dependent, catalytic) inhibitor alpha (PKIA), transcript variant 6, mRNA. | -0.05 | 8.46  | 6.57E-03 | 9.55E-03 | green |
| PM20D2  | 135293 | aminoacylase 1-like 2 (ACY1L2), mRNA.                                                          | -0.03 | 7.41  | 1.16E-02 | 1.64E-02 | green |
| PMS1    | 5378   | PMS1 postmeiotic segregation increased 1 ( <i>S. cerevisiae</i> ) (PMS1), mRNA.                | -0.11 | 6.26  | 2.50E-14 | 7.99E-14 | green |

|       |        |                                                                                                                |       |       |          |          |       |
|-------|--------|----------------------------------------------------------------------------------------------------------------|-------|-------|----------|----------|-------|
| PNKP  | 11284  | polynucleotide kinase 3'-phosphatase (PNKP), mRNA.                                                             | -0.13 | 7.84  | 7.25E-17 | 2.66E-16 | green |
| POC1B | 282809 | WD repeat domain 51B (WDR51B), mRNA.                                                                           | -0.19 | 8.57  | 7.36E-38 | 6.84E-37 | green |
| PPA2  | 27068  | pyrophosphatase (inorganic) 2 (PPA2), nuclear gene encoding mitochondrial protein, transcript variant 1, mRNA. | 0.20  | 6.47  | 2.36E-20 | 1.02E-19 | green |
| PPIL1 | 51645  | peptidylprolyl isomerase (cyclophilin)-like 1 (PPIL1), mRNA.                                                   | -0.04 | 6.38  | 1.80E-02 | 2.47E-02 | green |
| PPT1  | 5538   | palmitoyl-protein thioesterase 1 (ceroid-lipofuscinosis, neuronal 1, infantile) (PPT1), mRNA.                  | 0.20  | 8.16  | 4.30E-36 | 3.61E-35 | green |
| PRDX2 | 7001   | peroxiredoxin 2 (PRDX2), nuclear gene encoding mitochondrial protein, transcript variant 3, mRNA.              | -0.03 | 6.73  | 1.54E-02 | 2.14E-02 | green |
| PRKRA | 8575   | protein kinase, interferon-inducible double stranded RNA dependent activator (PRKRA), mRNA.                    | -0.04 | 7.18  | 2.71E-03 | 4.09E-03 | green |
| PSIP1 | 11168  | PC4 and SFRS1 interacting protein 1 (PSIP1), transcript variant 2, mRNA.                                       | -0.02 | 10.03 | 1.97E-01 | 2.34E-01 | green |
| PSMA6 | 5687   | proteasome (prosome, macropain) subunit, alpha type, 6 (PSMA6), mRNA.                                          | 0.18  | 5.42  | 5.71E-13 | 1.70E-12 | green |

|          |       |                                                                             |       |       |          |          |       |
|----------|-------|-----------------------------------------------------------------------------|-------|-------|----------|----------|-------|
| PSMD14   | 10213 | proteasome (prosome, macropain) 26S subunit, non-ATPase, 14 (PSMD14), mRNA. | 0.06  | 9.40  | 1.99E-05 | 3.68E-05 | green |
| PSMG1    | 8624  | Down syndrome critical region gene 2 (DSCR2), transcript variant 2, mRNA.   | 0.30  | 8.21  | 2.90E-53 | 5.16E-52 | green |
| PTGES3   | 10728 | prostaglandin E synthase 3 (cytosolic) (PTGES3), mRNA.                      | 0.06  | 7.38  | 9.96E-04 | 1.58E-03 | green |
| PTMA     | 5757  | prothymosin, alpha (gene sequence 28) (PTMA), mRNA.                         | 0.04  | 8.73  | 3.76E-03 | 5.60E-03 | green |
| PUS7     | 54517 | pseudouridylate synthase 7 homolog ( <i>S. cerevisiae</i> ) (PUS7), mRNA.   | -0.03 | 6.94  | 8.43E-02 | 1.07E-01 | green |
| RAB33B   | 83452 | RAB33B, member RAS oncogene family (RAB33B), mRNA.                          | 0.08  | 9.17  | 6.25E-07 | 1.29E-06 | green |
| RABGAP1L | 9910  | RAB GTPase activating protein 1-like (RABGAP1L), mRNA.                      | 0.11  | 6.67  | 1.13E-11 | 3.12E-11 | green |
| RAP1B    | 5908  | RAP1B, member of RAS oncogene family (RAP1B), transcript variant 2, mRNA.   | -0.10 | 7.20  | 4.59E-14 | 1.45E-13 | green |
| RBBP7    | 5931  | retinoblastoma binding protein 7 (RBBP7), mRNA.                             | 0.04  | 7.87  | 2.42E-02 | 3.29E-02 | green |
| RBM34    | 23029 | RNA binding motif protein 34 (RBM34), mRNA.                                 | -0.23 | 10.11 | 2.39E-47 | 3.44E-46 | green |
| RBM7     | 10179 | RNA binding motif protein 7 (RBM7), mRNA.                                   | -0.15 | 7.96  | 9.28E-21 | 4.10E-20 | green |

|          |        |                                                                                                            |       |       |           |           |       |
|----------|--------|------------------------------------------------------------------------------------------------------------|-------|-------|-----------|-----------|-------|
| REV3L    | 5980   | REV3-like, catalytic subunit of DNA polymerase zeta (yeast) (REV3L), mRNA.                                 | 0.11  | 8.55  | 9.69E-08  | 2.12E-07  | green |
| RNASEH2B | 79621  | ribonuclease H2, subunit B (RNASEH2B), mRNA.                                                               | -0.03 | 5.76  | 1.18E-01  | 1.46E-01  | green |
| RNF138   | 51444  | ring finger protein 138 (RNF138), transcript variant 2, mRNA.                                              | 0.48  | 8.44  | 6.00E-66  | 2.24E-64  | green |
| RNF219   | 79596  | chromosome 13 open reading frame 7 (C13orf7), mRNA.                                                        | 0.03  | 11.79 | 1.82E-03  | 2.81E-03  | green |
| RPL23    | 9349   | ribosomal protein L23 (RPL23), mRNA.                                                                       | 0.04  | 7.04  | 1.64E-03  | 2.54E-03  | green |
| RPL27A   | 6157   | ribosomal protein L27a (RPL27A), mRNA.                                                                     | 0.08  | 9.93  | 2.31E-09  | 5.59E-09  | green |
| RPL7     | 6129   | ribosomal protein L7 (RPL7), mRNA.                                                                         | 0.00  | 7.47  | 9.68E-01  | 9.73E-01  | green |
| RPL7A    | 6130   | ribosomal protein L7a (RPL7A), mRNA.                                                                       | 0.06  | 8.01  | 5.67E-05  | 1.01E-04  | green |
| RPLP1    | 729416 | hCG1641617 (LOC729416), mRNA.                                                                              | -0.13 | 6.40  | 3.49E-19  | 1.43E-18  | green |
| RPS28    | 6234   | ribosomal protein S28 (RPS28), mRNA.                                                                       | 1.04  | 9.75  | 3.08E-115 | 5.21E-112 | green |
| RPS3A    | 644972 | PREDICTED: similar to 40S ribosomal protein S3a (V-fos transformation effector protein) (LOC644972), mRNA. | -0.06 | 9.07  | 4.85E-06  | 9.45E-06  | green |
| RRN3     | 54700  | RRN3 RNA polymerase I transcription factor homolog ( <i>S. cerevisiae</i> ) (RRN3), mRNA.                  | 0.03  | 7.90  | 1.03E-02  | 1.46E-02  | green |

|         |       |                                                                                                                                  |       |       |          |          |       |
|---------|-------|----------------------------------------------------------------------------------------------------------------------------------|-------|-------|----------|----------|-------|
| RSF1    | 51773 | remodeling and spacing factor 1 (RSF1), mRNA.                                                                                    | 0.23  | 10.75 | 2.67E-36 | 2.28E-35 | green |
| RSL24D1 | 51187 | chromosome 15 open reading frame 15 (C15orf15), mRNA.                                                                            | 0.01  | 8.77  | 5.58E-01 | 6.02E-01 | green |
| RSPH1   | 89765 | testis specific A2 homolog (mouse) (TSGA2), mRNA.                                                                                | 0.17  | 7.38  | 7.89E-22 | 3.66E-21 | green |
| S1PR1   | 1901  | endothelial differentiation, sphingolipid G-protein-coupled receptor, 1 (EDG1), mRNA.                                            | 0.46  | 7.53  | 2.02E-77 | 1.38E-75 | green |
| SACM1L  | 22908 | SAC1 suppressor of actin mutations 1-like (yeast) (SACM1L), mRNA.                                                                | -0.03 | 7.53  | 9.86E-03 | 1.40E-02 | green |
| SAR1A   | 56681 | SAR1 gene homolog A ( <i>S. cerevisiae</i> ) (SAR1A), mRNA.                                                                      | -0.41 | 9.66  | 4.22E-57 | 9.60E-56 | green |
| SCOC    | 60592 | short coiled-coil protein (SCOC), mRNA.                                                                                          | 0.04  | 6.69  | 1.62E-02 | 2.24E-02 | green |
| SDHD    | 6392  | succinate dehydrogenase complex, subunit D, integral membrane protein (SDHD), nuclear gene encoding mitochondrial protein, mRNA. | 0.10  | 8.44  | 3.80E-15 | 1.26E-14 | green |
| SFPQ    | 6421  | splicing factor proline/glutamine-rich (polypyrimidine tract binding protein associated) (SFPQ), mRNA.                           | -0.03 | 9.84  | 2.31E-02 | 3.15E-02 | green |
| SH3RF1  | 57630 | SH3 domain containing ring finger 1 (SH3RF1), mRNA.                                                                              | 0.33  | 8.91  | 8.94E-59 | 2.32E-57 | green |

|          |       |                                                                                                                    |       |       |          |          |       |
|----------|-------|--------------------------------------------------------------------------------------------------------------------|-------|-------|----------|----------|-------|
| SIRT1    | 23411 | sirtuin (silent mating type information regulation 2 homolog) 1 ( <i>S. cerevisiae</i> ) (SIRT1), mRNA.            | -0.06 | 7.29  | 3.79E-05 | 6.84E-05 | green |
| SKIV2L2  | 23517 | superkiller viralicidic activity 2-like 2 ( <i>S. cerevisiae</i> ) (SKIV2L2), mRNA.                                | 0.79  | 10.82 | 3.19E-93 | 9.53E-91 | green |
| SLC25A13 | 10165 | solute carrier family 25, member 13 (citrin) (SLC25A13), mRNA.                                                     | 0.23  | 6.40  | 4.31E-37 | 3.81E-36 | green |
| SLC37A1  | 54020 | solute carrier family 37 (glycerol-3-phosphate transporter), member 1 (SLC37A1), mRNA.                             | -0.12 | 8.92  | 1.60E-20 | 6.98E-20 | green |
| SLC39A8  | 64116 | solute carrier family 39 (zinc transporter), member 8 (SLC39A8), mRNA.                                             | 0.10  | 8.91  | 2.07E-16 | 7.41E-16 | green |
| SLK      | 9748  | STE20-like kinase (yeast) (SLK), mRNA.                                                                             | 0.14  | 7.81  | 2.33E-14 | 7.45E-14 | green |
| SMARCA5  | 8467  | SWI/SNF related, matrix associated, actin dependent regulator of chromatin, subfamily a, member 5 (SMARCA5), mRNA. | 0.11  | 6.78  | 2.65E-10 | 6.79E-10 | green |
| SMNDC1   | 10285 | survival motor neuron domain containing 1 (SMNDC1), mRNA.                                                          | -0.12 | 7.98  | 5.81E-18 | 2.25E-17 | green |

|        |        |                                                                                                                                                                                                                                                                                                                 |       |       |          |          |       |
|--------|--------|-----------------------------------------------------------------------------------------------------------------------------------------------------------------------------------------------------------------------------------------------------------------------------------------------------------------|-------|-------|----------|----------|-------|
| SND1   | 27044  | staphylococcal nuclease and tudor domain containing 1 (SND1), mRNA.                                                                                                                                                                                                                                             | -0.05 | 6.30  | 1.55E-02 | 2.15E-02 | green |
| SP3    | 6670   | Sp3 transcription factor (SP3), transcript variant 1, mRNA.                                                                                                                                                                                                                                                     | 0.05  | 6.80  | 2.21E-03 | 3.37E-03 | green |
| SP4    | 6671   | Sp4 transcription factor (SP4), mRNA.                                                                                                                                                                                                                                                                           | 0.10  | 8.02  | 2.07E-08 | 4.70E-08 | green |
| SPIN4  | 139886 | hypothetical protein LOC139886 (LOC139886), mRNA.                                                                                                                                                                                                                                                               | 0.12  | 10.41 | 7.64E-22 | 3.55E-21 | green |
| SREK1  | 140890 | splicing factor, arginine/serine-rich 12 (SFRS12), transcript variant 2, mRNA.                                                                                                                                                                                                                                  | 0.08  | 8.24  | 1.32E-08 | 3.06E-08 | green |
| SRSF10 | 727922 | PREDICTED: similar to FUS-interacting serine-arginine-rich protein 1 (TLS-associated protein with Ser-Arg repeats) (TLS-associated protein with SR repeats) (TASR) (TLS-associated serine-arginine protein) (TLS-associated SR protein) (Neural-specific SR protein..., transcript variant 5 (LOC727922), mRNA. | 0.18  | 8.99  | 3.53E-27 | 2.09E-26 | green |
| SRSF11 | 9295   | splicing factor, arginine/serine-rich 11 (SFRS11), mRNA.                                                                                                                                                                                                                                                        | 0.35  | 10.44 | 5.11E-57 | 1.15E-55 | green |
| SRSF3  | 6428   | splicing factor, arginine/serine-rich 3 (SFRS3), mRNA.                                                                                                                                                                                                                                                          | 0.08  | 9.71  | 5.62E-08 | 1.25E-07 | green |



|          |       |                                                                                                               |       |      |          |          |       |
|----------|-------|---------------------------------------------------------------------------------------------------------------|-------|------|----------|----------|-------|
| STAG2    | 10735 | stromal antigen 2 (STAG2), transcript variant 3, mRNA.                                                        | -0.02 | 6.66 | 1.21E-01 | 1.49E-01 | green |
| STARD3NL | 83930 | STARD3 N-terminal like (STARD3NL), mRNA.                                                                      | -0.04 | 7.37 | 7.56E-04 | 1.21E-03 | green |
| STK26    | 51765 | serine/threonine protein kinase MST4 (MST4), transcript variant 3, mRNA.                                      | 0.17  | 7.46 | 3.75E-28 | 2.29E-27 | green |
| SUB1     | 10923 | SUB1 homolog (S. cerevisiae) (SUB1), mRNA.                                                                    | 0.04  | 9.84 | 1.23E-05 | 2.33E-05 | green |
| SUMO2    | 6613  | SMT3 suppressor of mif two 3 homolog 2 (S. cerevisiae) (SUMO2), transcript variant 1, mRNA.                   | 0.05  | 8.98 | 2.62E-05 | 4.80E-05 | green |
| SYAP1    | 94056 | synapse associated protein 1, SAP47 homolog (Drosophila) (SYAP1), mRNA.                                       | -0.17 | 8.55 | 3.80E-15 | 1.26E-14 | green |
| TCERG1   | 10915 | transcription elongation regulator 1 (TCERG1), transcript variant 2, mRNA.                                    | 0.14  | 9.16 | 3.34E-12 | 9.50E-12 | green |
| TCF12    | 6938  | transcription factor 12 (HTF4, helix-loop-helix transcription factors 4) (TCF12), transcript variant 1, mRNA. | -0.19 | 7.96 | 2.93E-35 | 2.37E-34 | green |
| TEX30    | 93081 | chromosome 13 open reading frame 27 (C13orf27), mRNA.                                                         | -0.18 | 8.24 | 5.13E-23 | 2.53E-22 | green |
| TIMM21   | 29090 | chromosome 18 open reading frame 55 (C18orf55), mRNA.                                                         | 0.06  | 7.33 | 4.54E-04 | 7.46E-04 | green |

|          |        |                                                                                                   |       |       |          |          |       |
|----------|--------|---------------------------------------------------------------------------------------------------|-------|-------|----------|----------|-------|
| TIPRL    | 261726 | TIP41, TOR signalling pathway regulator-like (S. cerevisiae) (TIPRL), transcript variant 1, mRNA. | -0.03 | 5.75  | 8.90E-02 | 1.12E-01 | green |
| TLK1     | 9874   | tousled-like kinase 1 (TLK1), mRNA.                                                               | 0.00  | 10.03 | 8.24E-01 | 8.48E-01 | green |
| TMA16    | 55319  | hypothetical protein FLJ11184 (FLJ11184), mRNA.                                                   | 0.09  | 9.26  | 8.64E-06 | 1.65E-05 | green |
| TMEM14B  | 81853  | transmembrane protein 14B (TMEM14B), mRNA.                                                        | -0.17 | 8.75  | 2.01E-21 | 9.14E-21 | green |
| TMEM167A | 153339 | transmembrane protein 167 (TMEM167), mRNA.                                                        | -0.05 | 9.15  | 9.75E-05 | 1.70E-04 | green |
| TMEM263  | 90488  | chromosome 12 open reading frame 23 (C12orf23), mRNA.                                             | -0.01 | 7.87  | 5.95E-01 | 6.36E-01 | green |
| TPM3     | 7170   | tropomyosin 3 (TPM3), transcript variant 3, mRNA.                                                 | 0.54  | 8.53  | 4.29E-49 | 6.56E-48 | green |
| TRAF3IP2 | 10758  | TRAF3 interacting protein 2 (TRAF3IP2), transcript variant 1, mRNA.                               | 0.17  | 10.61 | 5.56E-14 | 1.75E-13 | green |
| TRIP12   | 9320   | thyroid hormone receptor interactor 12 (TRIP12), mRNA.                                            | 0.08  | 9.22  | 1.35E-08 | 3.12E-08 | green |
| TRIT1    | 54802  | tRNA isopentenyltransferase 1 (TRIT1), mRNA.                                                      | -0.05 | 8.33  | 6.13E-07 | 1.27E-06 | green |
| TRMT10C  | 54931  | RNA (guanine-9-) methyltransferase domain containing 1 (RG9MTD1), mRNA.                           | -0.23 | 8.10  | 1.07E-31 | 7.48E-31 | green |

|        |       |                                                                                  |       |       |          |          |       |
|--------|-------|----------------------------------------------------------------------------------|-------|-------|----------|----------|-------|
| TRNT1  | 51095 | tRNA nucleotidyl transferase, CCA-adding, 1 (TRNT1), transcript variant 2, mRNA. | 0.58  | 7.43  | 3.12E-62 | 9.79E-61 | green |
| TSPYL5 | 85453 | TSPY-like 5 (TSPYL5), mRNA.                                                      | -0.06 | 6.91  | 2.40E-05 | 4.43E-05 | green |
| TSR2   | 90121 | TSR2, 20S rRNA accumulation, homolog (S. cerevisiae) (TSR2), mRNA.               | -0.23 | 7.00  | 4.59E-34 | 3.51E-33 | green |
| TTC33  | 23548 | tetratricopeptide repeat domain 33 (TTC33), mRNA.                                | 0.01  | 9.56  | 6.62E-01 | 6.99E-01 | green |
| TUBA4A | 7277  | tubulin, alpha 4a (TUBA4A), mRNA.                                                | -0.03 | 7.53  | 1.35E-01 | 1.65E-01 | green |
| TUBD1  | 51174 | tubulin, delta 1 (TUBD1), mRNA.                                                  | 0.05  | 7.74  | 5.08E-04 | 8.31E-04 | green |
| TXNDC9 | 10190 | thioredoxin domain containing 9 (TXNDC9), mRNA.                                  | -0.06 | 7.14  | 2.37E-06 | 4.72E-06 | green |
| TXNL1  | 9352  | thioredoxin-like 1 (TXNL1), mRNA.                                                | -0.06 | 6.84  | 2.19E-03 | 3.33E-03 | green |
| UBA6   | 55236 | ubiquitin-activating enzyme E1-like 2 (UBE1L2), mRNA.                            | 0.23  | 8.56  | 1.71E-29 | 1.08E-28 | green |
| UBE2V2 | 7336  | ubiquitin-conjugating enzyme E2 variant 2 (UBE2V2), mRNA.                        | -0.03 | 6.61  | 2.50E-02 | 3.38E-02 | green |
| UBQLN2 | 29978 | ubiquilin 2 (UBQLN2), mRNA.                                                      | 0.19  | 7.74  | 2.80E-24 | 1.46E-23 | green |
| UGP2   | 7360  | UDP-glucose pyrophosphorylase 2 (UGP2), transcript variant 2, mRNA.              | -0.15 | 7.49  | 4.44E-20 | 1.91E-19 | green |
| UQCRC2 | 7385  | ubiquinol-cytochrome c reductase core protein II (UQCRC2), mRNA.                 | 0.08  | 8.90  | 7.09E-09 | 1.67E-08 | green |
| UQCRH  | 7388  | ubiquinol-cytochrome c reductase hinge protein (UQCRH), mRNA.                    | -0.01 | 10.24 | 2.59E-01 | 3.01E-01 | green |

|        |        |                                                                                    |       |       |          |          |       |
|--------|--------|------------------------------------------------------------------------------------|-------|-------|----------|----------|-------|
| USP1   | 7398   | ubiquitin specific peptidase 1 (USP1), transcript variant 3, mRNA.                 | 0.14  | 7.70  | 1.06E-15 | 3.66E-15 | green |
| USP33  | 23032  | ubiquitin specific peptidase 33 (USP33), transcript variant 3, mRNA.               | 0.09  | 7.64  | 6.17E-08 | 1.36E-07 | green |
| UTP11L | 51118  | UTP11-like, U3 small nucleolar ribonucleoprotein, (yeast) (UTP11L), mRNA.          | -0.04 | 6.39  | 3.47E-02 | 4.61E-02 | green |
| UTP18  | 51096  | UTP18, small subunit (SSU) processome component, homolog (yeast) (UTP18), mRNA.    | -0.03 | 7.76  | 8.96E-02 | 1.13E-01 | green |
| UTP3   | 57050  | disrupter of silencing 10 (SAS10), mRNA.                                           | 0.07  | 8.29  | 1.82E-04 | 3.09E-04 | green |
| VMA21  | 203547 | hypothetical protein LOC203547 (LOC203547), mRNA.                                  | 0.16  | 9.62  | 4.38E-23 | 2.17E-22 | green |
| VRK3   | 51231  | vaccinia related kinase 3 (VRK3), transcript variant 1, mRNA.                      | 0.03  | 6.03  | 2.84E-02 | 3.81E-02 | green |
| VWA8   | 23078  | KIAA0564 protein (KIAA0564), transcript variant 1, mRNA.                           | -0.14 | 11.47 | 6.14E-20 | 2.61E-19 | green |
| WDR48  | 57599  | WD repeat domain 48 (WDR48), mRNA.                                                 | -0.04 | 10.01 | 6.52E-03 | 9.49E-03 | green |
| WIPF1  | 7456   | WAS/WASL interacting protein family, member 1 (WIPF1), transcript variant 1, mRNA. | 0.19  | 8.01  | 2.60E-19 | 1.07E-18 | green |
| WSB1   | 26118  | WD repeat and SOCS box-containing 1 (WSB1), transcript variant 1, mRNA.            | 0.32  | 7.13  | 9.74E-42 | 1.06E-40 | green |

|         |        |                                                                                                          |       |       |          |          |       |
|---------|--------|----------------------------------------------------------------------------------------------------------|-------|-------|----------|----------|-------|
| WSB2    | 55884  | WD repeat and SOCS box-containing 2 (WSB2), mRNA.                                                        | 0.05  | 8.43  | 2.58E-04 | 4.33E-04 | green |
| XPO1    | 7514   | exportin 1 (CRM1 homolog, yeast) (XPO1), mRNA.                                                           | 0.12  | 7.06  | 1.61E-07 | 3.46E-07 | green |
| YEATS4  | 8089   | YEATS domain containing 4 (YEATS4), mRNA.                                                                | -0.01 | 10.85 | 4.91E-01 | 5.36E-01 | green |
| YWHAG   | 7532   | tyrosine 3-monooxygenase/tryptophan 5-monooxygenase activation protein, gamma polypeptide (YWHAG), mRNA. | -0.06 | 5.62  | 6.00E-04 | 9.74E-04 | green |
| ZBTB33  | 10009  | zinc finger and BTB domain containing 33 (ZBTB33), mRNA.                                                 | 0.28  | 9.52  | 2.55E-31 | 1.74E-30 | green |
| ZFR     | 51663  | zinc finger RNA binding protein (ZFR), mRNA.                                                             | 0.00  | 7.53  | 9.20E-01 | 9.32E-01 | green |
| ZGRF1   | 91431  | prematurely terminated mRNA decay factor-like (LOC91431), mRNA.                                          | -0.07 | 8.76  | 1.35E-08 | 3.12E-08 | green |
| ZNF274  | 10782  | zinc finger protein 274 (ZNF274), transcript variant ZNF274a, mRNA.                                      | 0.00  | 6.89  | 9.74E-01 | 9.79E-01 | green |
| ZNF518B | 85460  | KIAA1729 protein (KIAA1729), mRNA.                                                                       | 0.18  | 7.30  | 3.11E-23 | 1.55E-22 | green |
| ZNF721  | 170960 | zinc finger protein 721 (ZNF721), mRNA.                                                                  | -0.01 | 8.85  | 6.16E-01 | 6.57E-01 | green |
| ZNF91   | 7644   | zinc finger protein 91 (ZNF91), mRNA.                                                                    | -0.01 | 6.31  | 5.12E-01 | 5.57E-01 | green |
| ZNHIT3  | 9326   | zinc finger, HIT type 3 (ZNHIT3), transcript variant 1, mRNA.                                            | 0.07  | 7.90  | 5.69E-04 | 9.24E-04 | green |

|        |        |                                                                                                |       |      |          |          |             |
|--------|--------|------------------------------------------------------------------------------------------------|-------|------|----------|----------|-------------|
| MOSC2  | 54996  | MOCO sulphurase C-terminal domain containing 2 (MOSC2), mRNA.                                  | -0.47 | 5.86 | 2.35E-40 | 2.42E-39 | greenyellow |
| SEPT10 | 151011 | septin 10 (SEPT10), transcript variant 2, mRNA.                                                | 0.20  | 6.06 | 7.16E-18 | 2.76E-17 | greenyellow |
| ABCG1  | 9619   | ATP-binding cassette, sub-family G (WHITE), member 1 (ABCG1), transcript variant 6, mRNA.      | 0.02  | 8.33 | 3.12E-01 | 3.57E-01 | greenyellow |
| ABLIM1 | 3983   | actin binding LIM protein 1 (ABLIM1), transcript variant 4, mRNA.                              | 0.02  | 9.32 | 1.50E-01 | 1.82E-01 | greenyellow |
| ACSS2  | 55902  | acyl-CoA synthetase short-chain family member 2 (ACSS2), transcript variant 1, mRNA.           | -0.12 | 6.99 | 4.96E-10 | 1.25E-09 | greenyellow |
| ADAM23 | 8745   | ADAM metalloproteinase domain 23 (ADAM23), mRNA.                                               | 0.02  | 9.55 | 1.44E-01 | 1.75E-01 | greenyellow |
| ADARB1 | 104    | adenosine deaminase, RNA-specific, B1 (RED1 homolog rat) (ADARB1), transcript variant 3, mRNA. | -0.19 | 7.93 | 4.42E-25 | 2.41E-24 | greenyellow |
| ADGRE1 | 2015   | egf-like module containing, mucin-like, hormone receptor-like 1 (EMR1), mRNA.                  | 0.03  | 6.54 | 9.52E-02 | 1.19E-01 | greenyellow |
| ADM    | 133    | adrenomedullin (ADM), mRNA.                                                                    | 0.09  | 6.13 | 1.55E-11 | 4.25E-11 | greenyellow |

|          |        |                                                                                         |       |      |          |          |             |
|----------|--------|-----------------------------------------------------------------------------------------|-------|------|----------|----------|-------------|
| AFAP1L2  | 84632  | actin filament associated protein 1-like 2 (AFAP1L2), transcript variant 1, mRNA.       | -0.09 | 6.99 | 2.19E-06 | 4.37E-06 | greenyellow |
| ALPK2    | 115701 | heart alpha-kinase (HAK), mRNA.                                                         | 0.00  | 9.82 | 8.39E-01 | 8.63E-01 | greenyellow |
| ANXA1    | 301    | annexin A1 (ANXA1), mRNA.                                                               | -0.20 | 8.14 | 1.11E-23 | 5.65E-23 | greenyellow |
| ARHGAP25 | 9938   | Rho GTPase activating protein 25 (ARHGAP25), transcript variant 1, mRNA.                | 0.03  | 7.91 | 7.20E-02 | 9.20E-02 | greenyellow |
| ARHGAP44 | 9912   | KIAA0672 gene product (KIAA0672), mRNA.                                                 | -0.10 | 6.83 | 2.77E-09 | 6.67E-09 | greenyellow |
| ATG4C    | 84938  | ATG4 autophagy related 4 homolog C (S. cerevisiae) (ATG4C), transcript variant 8, mRNA. | -0.11 | 9.48 | 2.55E-14 | 8.14E-14 | greenyellow |
| ATP6V1G1 | 9550   | ATPase, H <sup>+</sup> transporting, lysosomal 13kDa, V1 subunit G1 (ATP6V1G1), mRNA.   | -0.02 | 7.96 | 1.37E-01 | 1.67E-01 | greenyellow |
| AUTS2    | 26053  | autism susceptibility candidate 2 (AUTS2), mRNA.                                        | -0.06 | 7.66 | 4.92E-04 | 8.07E-04 | greenyellow |
| BAG3     | 9531   | BCL2-associated athanogene 3 (BAG3), mRNA.                                              | -0.81 | 6.54 | 4.22E-52 | 7.20E-51 | greenyellow |
| BANK1    | 55024  | B-cell scaffold protein with ankyrin repeats 1 (BANK1), mRNA.                           | 0.41  | 5.72 | 9.75E-47 | 1.37E-45 | greenyellow |
| BASP1    | 10409  | brain abundant, membrane attached signal protein 1 (BASP1), mRNA.                       | 1.16  | 8.03 | 1.31E-89 | 2.56E-87 | greenyellow |
| BCAT1    | 586    | branched chain aminotransferase 1, cytosolic (BCAT1), mRNA.                             | -0.03 | 8.09 | 1.22E-02 | 1.72E-02 | greenyellow |

|          |        |                                                                              |       |      |          |          |             |
|----------|--------|------------------------------------------------------------------------------|-------|------|----------|----------|-------------|
| BMP4     | 652    | bone morphogenetic protein 4 (BMP4), transcript variant 2, mRNA.             | 0.07  | 9.42 | 5.94E-05 | 1.06E-04 | greenyellow |
| BZW2     | 28969  | basic leucine zipper and W2 domains 2 (BZW2), mRNA.                          | 0.17  | 7.17 | 1.26E-27 | 7.63E-27 | greenyellow |
| C11orf80 | 79703  | hypothetical protein FLJ22531 (FLJ22531), mRNA.                              | 0.02  | 6.14 | 2.29E-01 | 2.68E-01 | greenyellow |
| C17orf58 | 284018 | chromosome 17 open reading frame 58 (C17orf58), transcript variant 1, mRNA.  | 0.12  | 8.35 | 2.04E-10 | 5.26E-10 | greenyellow |
| C1orf115 | 79762  | chromosome 1 open reading frame 115 (C1orf115), mRNA.                        | 0.20  | 8.24 | 1.34E-29 | 8.52E-29 | greenyellow |
| CAMK1    | 8536   | calcium/calmodulin-dependent protein kinase I (CAMK1), mRNA.                 | 0.24  | 9.94 | 8.60E-30 | 5.54E-29 | greenyellow |
| CBFB     | 865    | core-binding factor, beta subunit (CBFB), transcript variant 1, mRNA.        | 0.03  | 7.87 | 2.00E-02 | 2.74E-02 | greenyellow |
| CBLB     | 868    | Cas-Br-M (murine) ecotropic retroviral transforming sequence b (CBLB), mRNA. | -0.15 | 7.82 | 2.52E-21 | 1.14E-20 | greenyellow |
| CCDC53   | 51019  | coiled-coil domain containing 53 (CCDC53), mRNA.                             | 0.07  | 6.10 | 9.47E-10 | 2.34E-09 | greenyellow |
| CCDC74A  | 90557  | coiled-coil domain containing 74A (CCDC74A), mRNA.                           | -0.20 | 8.69 | 1.27E-26 | 7.32E-26 | greenyellow |
| CCDC74B  | 91409  | coiled-coil domain containing 74B (CCDC74B), mRNA.                           | -0.07 | 9.57 | 1.03E-06 | 2.10E-06 | greenyellow |



|         |        |                                                                                |       |      |          |          |             |
|---------|--------|--------------------------------------------------------------------------------|-------|------|----------|----------|-------------|
| CD2BP2  | 10421  | CD2 (cytoplasmic tail) binding protein 2 (CD2BP2), mRNA.                       | 0.01  | 9.09 | 6.71E-01 | 7.08E-01 | greenyellow |
| CD47    | 961    | CD47 molecule (CD47), transcript variant 2, mRNA.                              | 0.03  | 9.61 | 2.76E-02 | 3.71E-02 | greenyellow |
| CLIC6   | 54102  | chloride intracellular channel 6 (CLIC6), mRNA.                                | -0.13 | 7.06 | 8.69E-15 | 2.85E-14 | greenyellow |
| CLYBL   | 171425 | citrate lyase beta like (CLYBL), transcript variant 2, mRNA.                   | 0.24  | 9.38 | 5.22E-44 | 6.30E-43 | greenyellow |
| CORO1B  | 57175  | coronin, actin binding protein, 1B (CORO1B), transcript variant 2, mRNA.       | 0.73  | 6.96 | 1.98E-76 | 1.27E-74 | greenyellow |
| CPA4    | 51200  | carboxypeptidase A4 (CPA4), mRNA.                                              | 0.02  | 6.44 | 1.34E-01 | 1.64E-01 | greenyellow |
| CREB5   | 9586   | cAMP responsive element binding protein 5 (CREB5), transcript variant 3, mRNA. | 0.05  | 8.58 | 2.82E-06 | 5.58E-06 | greenyellow |
| CREG1   | 8804   | cellular repressor of E1A-stimulated genes 1 (CREG1), mRNA.                    | 0.16  | 7.08 | 2.18E-24 | 1.15E-23 | greenyellow |
| CRY1    | 1407   | cryptochrome 1 (photolyase-like) (CRY1), mRNA.                                 | -0.04 | 7.73 | 4.50E-03 | 6.65E-03 | greenyellow |
| CYSTM1  | 84418  | chromosome 5 open reading frame 32 (C5orf32), mRNA.                            | 0.04  | 9.40 | 5.63E-03 | 8.23E-03 | greenyellow |
| DCBLD2  | 131566 | discoidin, CUB and LCCL domain containing 2 (DCBLD2), mRNA.                    | -0.05 | 9.20 | 1.01E-05 | 1.92E-05 | greenyellow |
| DENND2D | 79961  | DENN/MADD domain containing 2D (DENND2D), mRNA.                                | -0.12 | 6.85 | 4.13E-12 | 1.17E-11 | greenyellow |

|         |        |                                                                  |       |       |          |          |             |
|---------|--------|------------------------------------------------------------------|-------|-------|----------|----------|-------------|
| DENND5A | 23258  | RAB6 interacting protein 1 (RAB6IP1), mRNA.                      | -0.02 | 6.16  | 1.50E-01 | 1.82E-01 | greenyellow |
| DNAJA4  | 55466  | DnaJ (Hsp40) homolog, subfamily A, member 4 (DNAJA4), mRNA.      | 0.03  | 6.14  | 6.39E-02 | 8.22E-02 | greenyellow |
| DSC2    | 1824   | desmocollin 2 (DSC2), transcript variant Dsc2b, mRNA.            | -0.03 | 7.56  | 1.13E-01 | 1.41E-01 | greenyellow |
| DSG2    | 1829   | desmoglein 2 (DSG2), mRNA.                                       | 0.10  | 10.39 | 5.98E-13 | 1.78E-12 | greenyellow |
| DUSP23  | 54935  | dual specificity phosphatase 23 (DUSP23), mRNA.                  | 0.33  | 10.08 | 7.11E-53 | 1.24E-51 | greenyellow |
| DYNLT1  | 6993   | dynein, light chain, Tctex-type 1 (DYNLT1), mRNA.                | -0.21 | 8.33  | 4.40E-26 | 2.49E-25 | greenyellow |
| ECHDC3  | 79746  | enoyl Coenzyme A hydratase domain containing 3 (ECHDC3), mRNA.   | 0.16  | 6.72  | 2.91E-28 | 1.79E-27 | greenyellow |
| FAH     | 2184   | fumarylacetoacetate hydrolase (fumarylacetoacetase) (FAH), mRNA. | 0.03  | 6.74  | 1.05E-01 | 1.31E-01 | greenyellow |
| FAM101B | 359845 | family with sequence similarity 101, member B (FAM101B), mRNA.   | -0.08 | 8.12  | 5.52E-10 | 1.38E-09 | greenyellow |
| FAM167A | 83648  | chromosome 8 open reading frame 13 (C8orf13), mRNA.              | -0.16 | 8.42  | 9.96E-21 | 4.39E-20 | greenyellow |
| FAM43A  | 131583 | family with sequence similarity 43, member A (FAM43A), mRNA.     | 0.08  | 9.80  | 2.07E-12 | 5.94E-12 | greenyellow |
| FES     | 2242   | feline sarcoma oncogene (FES), mRNA.                             | -0.12 | 8.91  | 6.34E-17 | 2.34E-16 | greenyellow |
| FHOD3   | 80206  | formin homology 2 domain containing 3 (FHOD3), mRNA.             | 0.05  | 5.89  | 5.40E-03 | 7.91E-03 | greenyellow |

|        |        |                                                                                                  |       |      |          |          |             |
|--------|--------|--------------------------------------------------------------------------------------------------|-------|------|----------|----------|-------------|
| FRMD4A | 55691  | FERM domain containing 4A (FRMD4A), mRNA.                                                        | -0.23 | 6.57 | 6.52E-26 | 3.66E-25 | greenyellow |
| GAP43  | 2596   | growth associated protein 43 (GAP43), mRNA.                                                      | 0.03  | 9.85 | 3.09E-01 | 3.53E-01 | greenyellow |
| GCSAM  | 257144 | germinal center expressed transcript 2 (GCET2), transcript variant 1, mRNA.                      | -0.19 | 9.50 | 1.10E-37 | 1.01E-36 | greenyellow |
| GIMAP1 | 170575 | GTPase, IMAP family member 1 (GIMAP1), mRNA.                                                     | -0.05 | 8.63 | 2.24E-03 | 3.40E-03 | greenyellow |
| GIMAP2 | 26157  | GTPase, IMAP family member 2 (GIMAP2), mRNA.                                                     | -0.15 | 5.72 | 1.79E-19 | 7.46E-19 | greenyellow |
| GIMAP4 | 55303  | GTPase, IMAP family member 4 (GIMAP4), mRNA.                                                     | -0.05 | 7.01 | 3.96E-04 | 6.54E-04 | greenyellow |
| GIMAP6 | 474344 | GTPase, IMAP family member 6 (GIMAP6), transcript variant 1, mRNA.                               | 0.70  | 6.08 | 1.12E-58 | 2.83E-57 | greenyellow |
| GIMAP7 | 168537 | GTPase, IMAP family member 7 (GIMAP7), mRNA.                                                     | -0.03 | 7.86 | 6.07E-02 | 7.83E-02 | greenyellow |
| GLB1L2 | 89944  | hypothetical protein BC008326 (LOC89944), mRNA.                                                  | 0.02  | 7.82 | 2.82E-01 | 3.25E-01 | greenyellow |
| GPD1L  | 23171  | glycerol-3-phosphate dehydrogenase 1-like (GPD1L), mRNA.                                         | -0.17 | 6.27 | 7.23E-17 | 2.66E-16 | greenyellow |
| GPR18  | 2841   | G protein-coupled receptor 18 (GPR18), mRNA.                                                     | -0.02 | 7.10 | 9.39E-02 | 1.18E-01 | greenyellow |
| GPR183 | 1880   | Epstein-Barr virus induced gene 2 (lymphocyte-specific G protein-coupled receptor) (EBI2), mRNA. | 0.01  | 7.85 | 4.18E-01 | 4.64E-01 | greenyellow |

|         |       |                                                                                                                                 |       |       |          |          |             |
|---------|-------|---------------------------------------------------------------------------------------------------------------------------------|-------|-------|----------|----------|-------------|
| GRAP2   | 9402  | GRB2-related adaptor protein 2 (GRAP2), mRNA.                                                                                   | 0.03  | 7.77  | 7.30E-02 | 9.32E-02 | greenyellow |
| HDGFRP3 | 50810 | hepatoma-derived growth factor, related protein 3 (HDGFRP3), mRNA.                                                              | -0.01 | 7.45  | 1.33E-01 | 1.63E-01 | greenyellow |
| HECW2   | 57520 | HECT, C2 and WW domain containing E3 ubiquitin protein ligase 2 (HECW2), mRNA.                                                  | 0.02  | 11.04 | 4.95E-02 | 6.46E-02 | greenyellow |
| HK1     | 3098  | hexokinase 1 (HK1), nuclear gene encoding mitochondrial protein, transcript variant 1, mRNA.                                    | 0.09  | 7.85  | 6.12E-07 | 1.27E-06 | greenyellow |
| HOMER2  | 9455  | homer homolog 2 (Drosophila) (HOMER2), transcript variant 3, mRNA.                                                              | 0.28  | 7.60  | 1.97E-33 | 1.46E-32 | greenyellow |
| IL18R1  | 8809  | interleukin 18 receptor 1 (IL18R1), mRNA.                                                                                       | 0.03  | 7.52  | 1.07E-01 | 1.33E-01 | greenyellow |
| IL18RAP | 8807  | interleukin 18 receptor accessory protein (IL18RAP), mRNA.                                                                      | -0.10 | 8.45  | 2.76E-08 | 6.24E-08 | greenyellow |
| ISCU    | 23479 | iron-sulfur cluster scaffold homolog (E. coli) (ISCU), nuclear gene encoding mitochondrial protein, transcript variant 1, mRNA. | -0.07 | 9.16  | 9.98E-06 | 1.90E-05 | greenyellow |
| JUP     | 3728  | junction plakoglobin (JUP), transcript variant 1, mRNA.                                                                         | -0.07 | 6.41  | 5.90E-06 | 1.14E-05 | greenyellow |
| KDM1A   | 23028 | amine oxidase (flavin containing) domain 2 (AOF2), transcript variant 2, mRNA.                                                  | 0.00  | 7.32  | 9.18E-01 | 9.30E-01 | greenyellow |

|        |        |                                                                                                 |       |      |          |          |             |
|--------|--------|-------------------------------------------------------------------------------------------------|-------|------|----------|----------|-------------|
| LCP2   | 3937   | lymphocyte cytosolic protein 2 (SH2 domain containing leukocyte protein of 76kDa) (LCP2), mRNA. | 0.07  | 9.18 | 6.48E-09 | 1.53E-08 | greenyellow |
| LGALSL | 29094  | galectin-related protein (HSPC159), mRNA.                                                       | -0.23 | 5.97 | 4.80E-31 | 3.23E-30 | greenyellow |
| LHFPL2 | 10184  | lipoma HMGIC fusion partner-like 2 (LHFPL2), mRNA.                                              | 0.00  | 6.89 | 8.25E-01 | 8.49E-01 | greenyellow |
| LIMA1  | 51474  | LIM domain and actin binding 1 (LIMA1), mRNA.                                                   | -0.10 | 8.88 | 7.16E-13 | 2.12E-12 | greenyellow |
| LOXL3  | 84695  | lysyl oxidase-like 3 (LOXL3), mRNA.                                                             | -0.05 | 8.67 | 5.05E-06 | 9.81E-06 | greenyellow |
| LRIG3  | 121227 | leucine-rich repeats and immunoglobulin-like domains 3 (LRIG3), mRNA.                           | -0.21 | 5.72 | 1.06E-14 | 3.46E-14 | greenyellow |
| LRRC28 | 123355 | leucine rich repeat containing 28 (LRRC28), mRNA.                                               | 0.01  | 7.16 | 3.15E-01 | 3.59E-01 | greenyellow |
| LRRC34 | 151827 | leucine rich repeat containing 34 (LRRC34), mRNA.                                               | 0.28  | 8.24 | 5.43E-34 | 4.13E-33 | greenyellow |
| LRRC4C | 57689  | leucine rich repeat containing 4C (LRRC4C), mRNA.                                               | -0.27 | 6.90 | 9.31E-45 | 1.17E-43 | greenyellow |
| LTA4H  | 4048   | leukotriene A4 hydrolase (LTA4H), mRNA.                                                         | 0.13  | 7.31 | 7.17E-19 | 2.91E-18 | greenyellow |
| MS4A1  | 931    | membrane-spanning 4-domains, subfamily A, member 1 (MS4A1), transcript variant 1, mRNA.         | 0.02  | 6.37 | 6.35E-02 | 8.17E-02 | greenyellow |
| NA     | 389206 | coiled-coil domain containing 4 (CCDC4), mRNA.                                                  | 0.86  | 6.33 | 8.54E-59 | 2.23E-57 | greenyellow |

|         |        |                                                                                                       |       |      |          |          |             |
|---------|--------|-------------------------------------------------------------------------------------------------------|-------|------|----------|----------|-------------|
| NA      | 7784   | zona pellucida glycoprotein 3 (sperm receptor) (ZP3), mRNA.                                           | 0.24  | 9.59 | 7.58E-45 | 9.59E-44 | greenyellow |
| NA      | 55027  | hypothetical protein FLJ20718 (FLJ20718), transcript variant 1, mRNA.                                 | 0.17  | 6.27 | 1.92E-21 | 8.77E-21 | greenyellow |
| NA      | 55340  | GTPase, IMAP family member 5 (GIMAP5), mRNA.                                                          | -0.04 | 6.22 | 2.08E-02 | 2.85E-02 | greenyellow |
| NCKAP1  | 10787  | NCK-associated protein 1 (NCKAP1), transcript variant 1, mRNA.                                        | 0.05  | 8.75 | 3.23E-04 | 5.38E-04 | greenyellow |
| NKG7    | 4818   | natural killer cell group 7 sequence (NKG7), mRNA.                                                    | -0.18 | 8.18 | 9.77E-23 | 4.76E-22 | greenyellow |
| NPL     | 80896  | N-acetylneuraminate pyruvate lyase (dihydrodipicolinate synthase) (NPL), mRNA.                        | 0.04  | 6.98 | 1.13E-01 | 1.41E-01 | greenyellow |
| NPNT    | 255743 | nephronectin (NPNT), mRNA.                                                                            | -0.07 | 5.59 | 5.87E-06 | 1.14E-05 | greenyellow |
| NUFIP2  | 57532  | nuclear fragile X mental retardation protein interacting protein 2 (NUFIP2), mRNA.                    | 0.03  | 6.48 | 1.13E-02 | 1.60E-02 | greenyellow |
| NUP62CL | 54830  | nucleoporin 62kDa C-terminal like (NUP62CL), mRNA.                                                    | 0.06  | 6.68 | 2.10E-03 | 3.22E-03 | greenyellow |
| OAT     | 4942   | ornithine aminotransferase (gyrate atrophy) (OAT), nuclear gene encoding mitochondrial protein, mRNA. | -0.56 | 7.74 | 2.78E-72 | 1.39E-70 | greenyellow |
| P3H2    | 55214  | leprecan-like 1 (LEPREL1), mRNA.                                                                      | -0.43 | 8.26 | 5.98E-58 | 1.44E-56 | greenyellow |

|        |       |                                                                                              |       |       |          |          |             |
|--------|-------|----------------------------------------------------------------------------------------------|-------|-------|----------|----------|-------------|
| PASK   | 23178 | PAS domain containing serine/threonine kinase (PASK), mRNA.                                  | 0.34  | 10.15 | 2.02E-38 | 1.91E-37 | greenyellow |
| PHTF1  | 10745 | putative homeodomain transcription factor 1 (PHTF1), mRNA.                                   | 0.01  | 9.33  | 5.55E-01 | 5.98E-01 | greenyellow |
| PIEZO2 | 63895 | family with sequence similarity 38, member B (FAM38B), mRNA.                                 | 0.33  | 6.50  | 1.23E-40 | 1.28E-39 | greenyellow |
| PLS3   | 5358  | plastin 3 (T isoform) (PLS3), mRNA.                                                          | 0.02  | 9.74  | 1.46E-01 | 1.77E-01 | greenyellow |
| POMZP3 | 22932 | POM (POM121 homolog, rat) and ZP3 fusion (POMZP3), transcript variant 1, mRNA.               | -0.12 | 8.53  | 2.30E-11 | 6.24E-11 | greenyellow |
| PPARG  | 5468  | peroxisome proliferator-activated receptor gamma (PPARG), transcript variant 3, mRNA.        | 0.01  | 9.39  | 4.49E-01 | 4.95E-01 | greenyellow |
| PPP2R4 | 5524  | protein phosphatase 2A activator, regulatory subunit 4 (PPP2R4), transcript variant 2, mRNA. | -0.05 | 9.56  | 1.13E-06 | 2.30E-06 | greenyellow |
| PRCP   | 5547  | prolylcarboxypeptidase (angiotensinase C) (PRCP), transcript variant 2, mRNA.                | 0.04  | 5.50  | 1.96E-02 | 2.69E-02 | greenyellow |
| PRKCH  | 5583  | protein kinase C, eta (PRKCH), mRNA.                                                         | -0.02 | 7.66  | 9.83E-02 | 1.23E-01 | greenyellow |

|         |        |                                                                                                                                                         |       |       |          |          |             |
|---------|--------|---------------------------------------------------------------------------------------------------------------------------------------------------------|-------|-------|----------|----------|-------------|
| PRNP    | 5621   | prion protein (p27-30) (Creutzfeldt-Jakob disease, Gerstmann-Strausler-Scheinker syndrome, fatal familial insomnia) (PRNP), transcript variant 3, mRNA. | -0.07 | 9.19  | 2.45E-05 | 4.50E-05 | greenyellow |
| PSMB9   | 5698   | proteasome (prosome, macropain) subunit, beta type, 9 (large multifunctional peptidase 2) (PSMB9), transcript variant 2, mRNA.                          | 0.01  | 9.32  | 3.98E-01 | 4.44E-01 | greenyellow |
| PTK2    | 5747   | PTK2 protein tyrosine kinase 2 (PTK2), transcript variant 2, mRNA.                                                                                      | 0.10  | 6.95  | 5.04E-10 | 1.27E-09 | greenyellow |
| PTP4A3  | 11156  | protein tyrosine phosphatase type IVA, member 3 (PTP4A3), transcript variant 2, mRNA.                                                                   | -0.04 | 6.76  | 2.26E-02 | 3.08E-02 | greenyellow |
| PTPN7   | 5778   | protein tyrosine phosphatase, non-receptor type 7 (PTPN7), transcript variant 1, mRNA.                                                                  | 0.11  | 8.03  | 8.74E-10 | 2.16E-09 | greenyellow |
| PTRF    | 284119 | polymerase I and transcript release factor (PTRF), mRNA.                                                                                                | 0.05  | 10.15 | 2.43E-03 | 3.69E-03 | greenyellow |
| PYROXD2 | 84795  | chromosome 10 open reading frame 33 (C10orf33), mRNA.                                                                                                   | -0.17 | 7.60  | 6.39E-22 | 2.97E-21 | greenyellow |
| QPCT    | 25797  | glutaminyl-peptide cyclotransferase (glutaminyl cyclase) (QPCT), mRNA.                                                                                  | 0.04  | 9.87  | 7.54E-05 | 1.33E-04 | greenyellow |



|         |        |                                                                           |       |      |          |          |             |
|---------|--------|---------------------------------------------------------------------------|-------|------|----------|----------|-------------|
| RABGEF1 | 27342  | RAB guanine nucleotide exchange factor (GEF) 1 (RABGEF1), mRNA.           | 0.04  | 8.99 | 4.75E-03 | 6.99E-03 | greenyellow |
| RAI14   | 26064  | retinoic acid induced 14 (RAI14), mRNA.                                   | -0.16 | 5.80 | 1.75E-23 | 8.79E-23 | greenyellow |
| RB1     | 5925   | retinoblastoma 1 (including osteosarcoma) (RB1), mRNA.                    | -0.13 | 9.24 | 7.22E-16 | 2.51E-15 | greenyellow |
| RCAN1   | 1827   | Down syndrome critical region gene 1 (DSCR1), transcript variant 2, mRNA. | 0.00  | 5.51 | 9.23E-01 | 9.35E-01 | greenyellow |
| REXO2   | 25996  | REX2, RNA exonuclease 2 homolog (S. cerevisiae) (REXO2), mRNA.            | 0.06  | 6.22 | 4.73E-04 | 7.76E-04 | greenyellow |
| RHBDD1  | 84236  | rhomboid domain containing 1 (RHBDD1), mRNA.                              | -0.16 | 8.90 | 6.99E-24 | 3.59E-23 | greenyellow |
| RIMBP2  | 23504  | RIMS binding protein 2 (RIMBP2), mRNA.                                    | -0.04 | 8.45 | 1.07E-03 | 1.70E-03 | greenyellow |
| RNF149  | 284996 | ring finger protein 149 (RNF149), mRNA.                                   | 0.21  | 9.75 | 3.31E-40 | 3.37E-39 | greenyellow |
| RPP25L  | 138716 | chromosome 9 open reading frame 23 (C9orf23), transcript variant 2, mRNA. | 0.21  | 6.69 | 1.14E-22 | 5.50E-22 | greenyellow |
| SAV1    | 60485  | salvador homolog 1 (Drosophila) (SAV1), mRNA.                             | 0.02  | 8.17 | 2.16E-01 | 2.55E-01 | greenyellow |
| SDC1    | 6382   | syndecan 1 (SDC1), transcript variant 2, mRNA.                            | 0.00  | 7.92 | 9.73E-01 | 9.77E-01 | greenyellow |

|          |       |                                                                                                     |       |       |          |          |             |
|----------|-------|-----------------------------------------------------------------------------------------------------|-------|-------|----------|----------|-------------|
| SEMA6A   | 57556 | sema domain, transmembrane domain (TM), and cytoplasmic domain, (semaphorin) 6A (SEMA6A), mRNA.     | -0.09 | 9.45  | 3.01E-10 | 7.66E-10 | greenyellow |
| SERPINB1 | 1992  | serpin peptidase inhibitor, clade B (ovalbumin), member 1 (SERPINB1), mRNA.                         | -0.23 | 7.16  | 1.49E-25 | 8.29E-25 | greenyellow |
| SERPINB6 | 5269  | serpin peptidase inhibitor, clade B (ovalbumin), member 6 (SERPINB6), mRNA.                         | -0.08 | 9.51  | 9.58E-11 | 2.50E-10 | greenyellow |
| SGCE     | 8910  | sarcoglycan, epsilon (SGCE), mRNA.                                                                  | 0.23  | 10.04 | 1.17E-29 | 7.51E-29 | greenyellow |
| SIK3     | 23387 | KIAA0999 protein (KIAA0999), mRNA.                                                                  | -0.08 | 6.84  | 3.64E-06 | 7.14E-06 | greenyellow |
| SLC23A2  | 9962  | solute carrier family 23 (nucleobase transporters), member 2 (SLC23A2), transcript variant 1, mRNA. | 0.06  | 6.87  | 2.53E-04 | 4.26E-04 | greenyellow |
| SNTB1    | 6641  | syntrophin, beta 1 (dystrophin-associated protein A1, 59kDa, basic component 1) (SNTB1), mRNA.      | -0.02 | 7.58  | 2.80E-01 | 3.23E-01 | greenyellow |
| SOWAHC   | 65124 | ankyrin repeat domain 57 (ANKRD57), mRNA.                                                           | 0.09  | 7.88  | 8.04E-08 | 1.77E-07 | greenyellow |
| ST7      | 7982  | suppression of tumorigenicity 7 (ST7), transcript variant a, mRNA.                                  | -0.10 | 9.65  | 8.59E-14 | 2.67E-13 | greenyellow |

|          |       |                                                                                               |       |       |          |          |             |
|----------|-------|-----------------------------------------------------------------------------------------------|-------|-------|----------|----------|-------------|
| STAT4    | 6775  | signal transducer and activator of transcription 4 (STAT4), mRNA.                             | 0.02  | 9.41  | 1.45E-01 | 1.77E-01 | greenyellow |
| SV2B     | 9899  | synaptic vesicle glycoprotein 2B (SV2B), mRNA.                                                | -0.01 | 7.20  | 6.37E-01 | 6.76E-01 | greenyellow |
| SYK      | 6850  | spleen tyrosine kinase (SYK), mRNA.                                                           | 0.19  | 9.08  | 6.38E-24 | 3.28E-23 | greenyellow |
| SYNJ2    | 8871  | synaptojanin 2 (SYNJ2), mRNA.                                                                 | -0.05 | 6.20  | 8.85E-04 | 1.41E-03 | greenyellow |
| TANC1    | 85461 | tetratricopeptide repeat, ankyrin repeat and coiled-coil containing 1 (TANC1), mRNA.          | -0.03 | 8.28  | 3.06E-02 | 4.09E-02 | greenyellow |
| TBC1D4   | 9882  | TBC1 domain family, member 4 (TBC1D4), mRNA.                                                  | -0.15 | 6.48  | 5.13E-20 | 2.20E-19 | greenyellow |
| TBL1X    | 6907  | transducin (beta)-like 1X-linked (TBL1X), mRNA.                                               | 0.05  | 10.16 | 1.38E-04 | 2.37E-04 | greenyellow |
| TESC     | 54997 | tescalcin (TESC), mRNA.                                                                       | 0.06  | 6.73  | 6.01E-04 | 9.75E-04 | greenyellow |
| TMEM144  | 55314 | transmembrane protein 144 (TMEM144), mRNA.                                                    | 0.13  | 8.65  | 7.61E-12 | 2.12E-11 | greenyellow |
| TMX4     | 56255 | thioredoxin domain containing 13 (TXNDC13), mRNA.                                             | -0.11 | 6.89  | 1.28E-13 | 3.95E-13 | greenyellow |
| TNFRSF19 | 55504 | tumor necrosis factor receptor superfamily, member 19 (TNFRSF19), transcript variant 2, mRNA. | 0.10  | 8.73  | 5.72E-13 | 1.70E-12 | greenyellow |
| TRAK1    | 22906 | trafficking protein, kinesin binding 1 (TRAK1), transcript variant 2, mRNA.                   | 0.06  | 7.45  | 1.50E-03 | 2.33E-03 | greenyellow |
| TTF2     | 8458  | transcription termination factor, RNA polymerase II (TTF2), mRNA.                             | 0.00  | 11.61 | 7.87E-01 | 8.15E-01 | greenyellow |

|         |        |                                                                                            |       |       |          |          |             |
|---------|--------|--------------------------------------------------------------------------------------------|-------|-------|----------|----------|-------------|
| UBAC2   | 337867 | phosphoglycerate dehydrogenase like 1 (PHGDHL1), mRNA.                                     | -0.11 | 7.07  | 4.47E-10 | 1.13E-09 | greenyellow |
| UBQLN1  | 29979  | ubiquilin 1 (UBQLN1), transcript variant 1, mRNA.                                          | -0.12 | 8.81  | 8.78E-20 | 3.71E-19 | greenyellow |
| UST     | 10090  | uronyl-2-sulfotransferase (UST), mRNA.                                                     | 0.11  | 7.50  | 1.29E-14 | 4.18E-14 | greenyellow |
| VIM     | 7431   | vimentin (VIM), mRNA.                                                                      | 0.03  | 12.44 | 1.18E-01 | 1.46E-01 | greenyellow |
| VRK2    | 7444   | vaccinia related kinase 2 (VRK2), mRNA.                                                    | -0.05 | 7.56  | 5.71E-04 | 9.28E-04 | greenyellow |
| WDR59   | 79726  | WD repeat domain 59 (WDR59), mRNA.                                                         | -0.01 | 8.94  | 3.29E-01 | 3.73E-01 | greenyellow |
| WDR91   | 29062  | HSPC049 protein (HSPC049), mRNA.                                                           | -0.77 | 8.13  | 1.45E-85 | 1.94E-83 | greenyellow |
| ZMIZ1   | 57178  | zinc finger, MIZ-type containing 1 (ZMIZ1), mRNA.                                          | -0.03 | 5.79  | 2.83E-02 | 3.80E-02 | greenyellow |
| ZNF185  | 7739   | zinc finger protein 185 (LIM domain) (ZNF185), mRNA.                                       | -0.01 | 5.67  | 5.35E-01 | 5.80E-01 | greenyellow |
| ZNF608  | 57507  | zinc finger protein 608 (ZNF608), mRNA.                                                    | 0.12  | 6.12  | 1.72E-10 | 4.44E-10 | greenyellow |
| BEX5    | 340542 | NGFRAP1-like 1 (NGFRAP1L1), mRNA.                                                          | 0.01  | 8.21  | 6.38E-01 | 6.77E-01 | grey        |
| CD163L1 | 283316 | CD163 molecule-like 1 (CD163L1), mRNA.                                                     | -0.45 | 6.32  | 2.64E-46 | 3.63E-45 | grey        |
| CD55    | 1604   | CD55 molecule, decay accelerating factor for complement (Cromer blood group) (CD55), mRNA. | 0.01  | 9.44  | 4.56E-01 | 5.02E-01 | grey        |
| DAPK1   | 1612   | death-associated protein kinase 1 (DAPK1), mRNA.                                           | -0.12 | 7.84  | 8.66E-12 | 2.40E-11 | grey        |

|          |        |                                                                                                          |       |      |          |          |      |
|----------|--------|----------------------------------------------------------------------------------------------------------|-------|------|----------|----------|------|
| DPYSL4   | 10570  | dihydropyrimidinase-like 4 (DPYSL4), mRNA.                                                               | 0.02  | 5.52 | 2.62E-01 | 3.04E-01 | grey |
| EIF1AY   | 9086   | eukaryotic translation initiation factor 1A, Y-linked (EIF1AY), mRNA.                                    | 0.04  | 9.08 | 1.75E-03 | 2.71E-03 | grey |
| EYA2     | 2139   | eyes absent homolog 2 (Drosophila) (EYA2), transcript variant 5, mRNA.                                   | -0.06 | 8.02 | 6.48E-07 | 1.34E-06 | grey |
| FHL1     | 2273   | four and a half LIM domains 1 (FHL1), mRNA.                                                              | -0.01 | 8.00 | 6.22E-01 | 6.62E-01 | grey |
| GALE     | 2582   | UDP-galactose-4-epimerase (GALE), transcript variant 1, mRNA.                                            | -0.65 | 7.23 | 1.06E-75 | 6.55E-74 | grey |
| GALNT18  | 374378 | UDP-N-acetyl-alpha-D-galactosamine:polypeptide N-acetylgalactosaminyltransferase-like 4 (GALNTL4), mRNA. | -0.26 | 7.61 | 7.43E-31 | 4.94E-30 | grey |
| GSTM1    | 2944   | glutathione S-transferase M1 (GSTM1), transcript variant 1, mRNA.                                        | 0.20  | 9.33 | 5.06E-37 | 4.46E-36 | grey |
| GTSF1    | 121355 | family with sequence similarity 112, member B (FAM112B), mRNA.                                           | 0.06  | 8.01 | 4.99E-04 | 8.17E-04 | grey |
| HDHD1    | 8226   | haloacid dehalogenase-like hydrolase domain containing 1A (HDHD1A), mRNA.                                | -0.13 | 6.59 | 2.59E-11 | 7.02E-11 | grey |
| HLA-DRB5 | 3127   | major histocompatibility complex, class II, DR beta 5 (HLA-DRB5), mRNA.                                  | -0.13 | 9.37 | 1.49E-15 | 5.08E-15 | grey |

|         |        |                                                                                                                      |       |      |          |          |      |
|---------|--------|----------------------------------------------------------------------------------------------------------------------|-------|------|----------|----------|------|
| IPO8    | 10526  | importin 8 (IPO8), mRNA.                                                                                             | 0.04  | 7.74 | 1.16E-03 | 1.83E-03 | grey |
| ISX     | 91464  | intestine-specific homeobox (ISX), mRNA.                                                                             | 0.00  | 8.91 | 8.72E-01 | 8.92E-01 | grey |
| KDM5D   | 8284   | jumonji, AT rich interactive domain 1D (JARID1D), mRNA.                                                              | -0.15 | 9.68 | 2.93E-21 | 1.32E-20 | grey |
| LMCD1   | 29995  | LIM and cysteine-rich domains 1 (LMCD1), mRNA.                                                                       | -0.05 | 6.65 | 1.54E-03 | 2.39E-03 | grey |
| NA      | 401233 | similar to HIV TAT specific factor 1; cofactor required for Tat activation of HIV-1 transcription (LOC401233), mRNA. | 0.27  | 6.27 | 2.72E-30 | 1.77E-29 | grey |
| NA      | 389833 | similar to hypothetical protein MGC27019 (LOC389833), mRNA.                                                          | -0.22 | 7.70 | 4.15E-29 | 2.61E-28 | grey |
| NA      | 283755 | hypothetical protein LOC283755 (LOC283755), mRNA.                                                                    | 0.03  | 6.97 | 3.61E-02 | 4.79E-02 | grey |
| NDUFAF1 | 51103  | NADH dehydrogenase (ubiquinone) 1 alpha subcomplex, assembly factor 1 (NDUFAF1), mRNA.                               | -0.05 | 8.29 | 1.43E-03 | 2.23E-03 | grey |
| NEFH    | 4744   | neurofilament, heavy polypeptide 200kDa (NEFH), mRNA.                                                                | -0.10 | 9.13 | 1.25E-12 | 3.65E-12 | grey |
| NKD2    | 85409  | naked cuticle homolog 2 (Drosophila) (NKD2), mRNA.                                                                   | 0.05  | 7.83 | 2.47E-06 | 4.90E-06 | grey |
| NLGN4Y  | 22829  | neuroligin 4, Y-linked (NLGN4Y), mRNA.                                                                               | 0.14  | 7.30 | 4.63E-18 | 1.80E-17 | grey |

|         |       |                                                                                                 |       |       |          |          |      |
|---------|-------|-------------------------------------------------------------------------------------------------|-------|-------|----------|----------|------|
| NLRP2   | 55655 | NLR family, pyrin domain containing 2 (NLRP2), mRNA.                                            | -0.32 | 7.04  | 1.20E-41 | 1.29E-40 | grey |
| PIGR    | 5284  | polymeric immunoglobulin receptor (PIGR), mRNA.                                                 | 0.10  | 9.36  | 2.18E-21 | 9.91E-21 | grey |
| PKHD1L1 | 93035 | polycystic kidney and hepatic disease 1 (autosomal recessive)-like 1 (PKHD1L1), mRNA.           | 0.11  | 6.34  | 4.33E-09 | 1.03E-08 | grey |
| PLBD1   | 79887 | hypothetical protein FLJ22662 (FLJ22662), mRNA.                                                 | -0.07 | 5.56  | 1.51E-05 | 2.84E-05 | grey |
| PTER    | 9317  | phosphotriesterase related (PTER), transcript variant 1, mRNA.                                  | 0.02  | 7.32  | 3.25E-01 | 3.70E-01 | grey |
| RAB34   | 83871 | RAB34, member RAS oncogene family (RAB34), mRNA.                                                | 0.00  | 10.83 | 7.97E-01 | 8.24E-01 | grey |
| RASIP1  | 54922 | Ras interacting protein 1 (RASIP1), mRNA.                                                       | 0.20  | 7.63  | 4.42E-31 | 2.98E-30 | grey |
| ROBO1   | 6091  | roundabout, axon guidance receptor, homolog 1 (Drosophila) (ROBO1), transcript variant 1, mRNA. | -0.01 | 7.84  | 6.53E-01 | 6.91E-01 | grey |
| RPS24   | 6229  | ribosomal protein S24 (RPS24), transcript variant 2, mRNA.                                      | -0.03 | 8.42  | 1.29E-01 | 1.58E-01 | grey |
| RPS4Y1  | 6192  | ribosomal protein S4, Y-linked 1 (RPS4Y1), mRNA.                                                | -0.02 | 7.95  | 1.25E-01 | 1.54E-01 | grey |
| SFRP1   | 6422  | secreted frizzled-related protein 1 (SFRP1), mRNA.                                              | -0.04 | 5.71  | 5.30E-02 | 6.89E-02 | grey |

|          |        |                                                                                                                       |       |      |          |          |      |
|----------|--------|-----------------------------------------------------------------------------------------------------------------------|-------|------|----------|----------|------|
| SLC25A47 | 283600 | chromosome 14 open reading frame 68 (C14orf68), mRNA.                                                                 | 0.01  | 9.84 | 5.48E-01 | 5.92E-01 | grey |
| SPINT2   | 10653  | serine peptidase inhibitor, Kunitz type, 2 (SPINT2), mRNA.                                                            | 0.02  | 6.51 | 4.65E-01 | 5.11E-01 | grey |
| TBXAS1   | 6916   | thromboxane A synthase 1 (platelet, cytochrome P450, family 5, subfamily A) (TBXAS1), transcript variant TXS-I, mRNA. | -0.24 | 9.15 | 3.50E-34 | 2.69E-33 | grey |
| THNSL1   | 79896  | threonine synthase-like 1 (bacterial) (THNSL1), mRNA.                                                                 | 0.03  | 6.93 | 1.22E-01 | 1.50E-01 | grey |
| TMSB4Y   | 9087   | thymosin, beta 4, Y-linked (TMSB4Y), mRNA.                                                                            | -0.03 | 7.06 | 5.56E-02 | 7.20E-02 | grey |
| TPM2     | 7169   | tropomyosin 2 (beta) (TPM2), transcript variant 2, mRNA.                                                              | 0.06  | 8.98 | 2.46E-03 | 3.74E-03 | grey |
| TRAPPC4  | 51399  | trafficking protein particle complex 4 (TRAPPC4), mRNA.                                                               | 0.00  | 7.89 | 9.42E-01 | 9.50E-01 | grey |
| TXLNGY   | 246126 | chromosome Y open reading frame 15A (CYorf15A), mRNA.                                                                 | -0.24 | 9.16 | 3.71E-34 | 2.85E-33 | grey |
| TXLNGY   | 84663  | chromosome Y open reading frame 15B (CYorf15B), mRNA.                                                                 | -0.03 | 9.87 | 2.09E-03 | 3.19E-03 | grey |
| USP9Y    | 8287   | ubiquitin specific peptidase 9, Y-linked (fat facets-like, Drosophila) (USP9Y), mRNA.                                 | 0.18  | 9.04 | 9.10E-15 | 2.97E-14 | grey |



|          |       |                                                                                                     |       |       |          |          |        |
|----------|-------|-----------------------------------------------------------------------------------------------------|-------|-------|----------|----------|--------|
| UTY      | 7404  | ubiquitously transcribed tetratricopeptide repeat gene, Y-linked (UTY), transcript variant 3, mRNA. | -0.07 | 5.48  | 4.34E-05 | 7.79E-05 | grey   |
| ABCA3    | 21    | ATP-binding cassette, sub-family A (ABC1), member 3 (ABCA3), mRNA.                                  | 0.06  | 7.67  | 8.41E-05 | 1.48E-04 | grey60 |
| ADTRP    | 84830 | chromosome 6 open reading frame 105 (C6orf105), mRNA.                                               | -0.51 | 8.41  | 4.63E-69 | 2.03E-67 | grey60 |
| ARL6IP5  | 10550 | ADP-ribosylation-like factor 6 interacting protein 5 (ARL6IP5), mRNA.                               | -0.03 | 6.90  | 2.26E-02 | 3.08E-02 | grey60 |
| ARPC5    | 10092 | actin related protein 2/3 complex, subunit 5, 16kDa (ARPC5), mRNA.                                  | 0.03  | 5.77  | 1.70E-02 | 2.34E-02 | grey60 |
| ATP8B2   | 57198 | ATPase, Class I, type 8B, member 2 (ATP8B2), transcript variant 1, mRNA.                            | 0.03  | 7.01  | 1.13E-01 | 1.40E-01 | grey60 |
| BHLHE40  | 8553  | basic helix-loop-helix domain containing, class B, 2 (BHLHB2), mRNA.                                | 0.04  | 7.48  | 1.74E-02 | 2.40E-02 | grey60 |
| C10orf10 | 11067 | chromosome 10 open reading frame 10 (C10orf10), mRNA.                                               | 0.04  | 10.16 | 1.49E-02 | 2.07E-02 | grey60 |
| CAPN2    | 824   | calpain 2, (m/II) large subunit (CAPN2), mRNA.                                                      | -0.09 | 6.02  | 1.55E-09 | 3.78E-09 | grey60 |
| CCL20    | 6364  | chemokine (C-C motif) ligand 20 (CCL20), mRNA.                                                      | 0.38  | 7.95  | 3.38E-58 | 8.33E-57 | grey60 |
| CCR6     | 1235  | chemokine (C-C motif) receptor 6 (CCR6), transcript variant 1, mRNA.                                | -0.12 | 9.31  | 1.40E-18 | 5.58E-18 | grey60 |

|         |        |                                                                                                               |       |       |          |          |        |
|---------|--------|---------------------------------------------------------------------------------------------------------------|-------|-------|----------|----------|--------|
| CCR7    | 1236   | chemokine (C-C motif) receptor 7 (CCR7), mRNA.                                                                | -0.09 | 6.68  | 8.39E-10 | 2.08E-09 | grey60 |
| CD74    | 972    | CD74 molecule, major histocompatibility complex, class II invariant chain (CD74), transcript variant 1, mRNA. | 0.07  | 6.19  | 1.40E-05 | 2.63E-05 | grey60 |
| CHST7   | 56548  | carbohydrate (N-acetylglucosamine 6-O) sulfotransferase 7 (CHST7), mRNA.                                      | -0.07 | 8.51  | 4.16E-06 | 8.12E-06 | grey60 |
| CIITA   | 4261   | class II, major histocompatibility complex, transactivator (CIITA), mRNA.                                     | -0.31 | 8.18  | 1.85E-43 | 2.19E-42 | grey60 |
| CMTM3   | 123920 | CKLF-like MARVEL transmembrane domain containing 3 (CMTM3), transcript variant 3, mRNA.                       | 0.10  | 8.09  | 1.54E-12 | 4.49E-12 | grey60 |
| CSRNP2  | 81566  | family with sequence similarity 130, member A1 (FAM130A1), mRNA.                                              | 0.09  | 9.02  | 7.23E-11 | 1.91E-10 | grey60 |
| CTSC    | 1075   | cathepsin C (CTSC), transcript variant 1, mRNA.                                                               | 0.14  | 7.13  | 5.62E-16 | 1.96E-15 | grey60 |
| EGR1    | 1958   | early growth response 1 (EGR1), mRNA.                                                                         | 0.05  | 6.69  | 7.32E-03 | 1.06E-02 | grey60 |
| FAM102B | 284611 | family with sequence similarity 102, member B (FAM102B), mRNA.                                                | 0.03  | 7.82  | 1.69E-01 | 2.03E-01 | grey60 |
| FAM129A | 116496 | chromosome 1 open reading frame 24 (C1orf24), transcript variant 2, mRNA.                                     | -0.23 | 10.73 | 3.18E-37 | 2.83E-36 | grey60 |

|               |        |                                                                                                                                   |       |       |          |          |        |
|---------------|--------|-----------------------------------------------------------------------------------------------------------------------------------|-------|-------|----------|----------|--------|
| FAM171A1      | 221061 | chromosome 10 open reading frame 38 (C10orf38), mRNA.                                                                             | -0.05 | 10.05 | 5.58E-04 | 9.07E-04 | grey60 |
| FAM64A        | 54478  | family with sequence similarity 64, member A (FAM64A), mRNA.                                                                      | 0.08  | 8.31  | 1.01E-06 | 2.06E-06 | grey60 |
| GCAT          | 23464  | glycine C-acetyltransferase (2-amino-3-ketobutyrate coenzyme A ligase) (GCAT), nuclear gene encoding mitochondrial protein, mRNA. | -0.07 | 9.69  | 1.07E-07 | 2.34E-07 | grey60 |
| GLTP          | 51228  | glycolipid transfer protein (GLTP), mRNA.                                                                                         | -0.04 | 5.43  | 1.64E-02 | 2.27E-02 | grey60 |
| H2AFJ         | 55766  | H2A histone family, member J (H2AFJ), transcript variant 2, mRNA.                                                                 | 0.11  | 8.31  | 1.13E-11 | 3.12E-11 | grey60 |
| HIST1H1C      | 3006   | histone cluster 1, H1c (HIST1H1C), mRNA.                                                                                          | -0.06 | 6.94  | 2.40E-03 | 3.65E-03 | grey60 |
| HIST1H2A<br>C | 8334   | histone cluster 1, H2ac (HIST1H2AC), mRNA.                                                                                        | -0.01 | 5.72  | 2.69E-01 | 3.11E-01 | grey60 |
| HIST1H2B<br>D | 3017   | histone cluster 1, H2bd (HIST1H2BD), transcript variant 2, mRNA.                                                                  | 2.06  | 6.75  | 3.95E-94 | 1.25E-91 | grey60 |
| HIST1H2BF     | 8343   | histone cluster 1, H2bf (HIST1H2BF), mRNA.                                                                                        | 0.02  | 9.39  | 8.44E-02 | 1.07E-01 | grey60 |
| HIST1H2B<br>G | 8339   | histone cluster 1, H2bg (HIST1H2BG), mRNA.                                                                                        | 0.11  | 6.49  | 1.62E-09 | 3.96E-09 | grey60 |
| HIST1H2B<br>H | 8345   | histone cluster 1, H2bh (HIST1H2BH), mRNA.                                                                                        | 0.15  | 11.01 | 9.15E-20 | 3.87E-19 | grey60 |

|           |       |                                                                                |       |      |          |          |        |
|-----------|-------|--------------------------------------------------------------------------------|-------|------|----------|----------|--------|
| HIST1H2BJ | 8970  | histone cluster 1, H2bj<br>(HIST1H2BJ), mRNA.                                  | -0.44 | 7.13 | 2.44E-54 | 4.70E-53 | grey60 |
| HIST1H2BK | 85236 | histone cluster 1, H2bk<br>(HIST1H2BK), mRNA.                                  | 0.00  | 8.94 | 9.04E-01 | 9.19E-01 | grey60 |
| HIST1H3D  | 8351  | histone cluster 1, H3d<br>(HIST1H3D), mRNA.                                    | 0.09  | 9.32 | 2.24E-08 | 5.09E-08 | grey60 |
| HIST1H4H  | 8365  | histone cluster 1, H4h<br>(HIST1H4H), mRNA.                                    | 0.12  | 6.55 | 1.74E-16 | 6.24E-16 | grey60 |
| HIST2H2AC | 8338  | histone cluster 2, H2ac<br>(HIST2H2AC), mRNA.                                  | 0.04  | 7.77 | 1.85E-02 | 2.54E-02 | grey60 |
| HLA-DMA   | 3108  | major histocompatibility<br>complex, class II, DM alpha<br>(HLA-DMA), mRNA.    | -0.14 | 6.27 | 2.03E-16 | 7.27E-16 | grey60 |
| HLA-DOA   | 3111  | major histocompatibility<br>complex, class II, DO alpha<br>(HLA-DOA), mRNA.    | -0.60 | 7.99 | 9.03E-54 | 1.65E-52 | grey60 |
| HLA-DPA1  | 3113  | major histocompatibility<br>complex, class II, DP alpha 1<br>(HLA-DPA1), mRNA. | -0.03 | 8.22 | 3.01E-02 | 4.02E-02 | grey60 |
| HLA-DPB1  | 3115  | major histocompatibility<br>complex, class II, DP beta 1<br>(HLA-DPB1), mRNA.  | 0.05  | 9.04 | 4.78E-04 | 7.83E-04 | grey60 |
| HLA-DRA   | 3122  | major histocompatibility<br>complex, class II, DR alpha<br>(HLA-DRA), mRNA.    | 0.17  | 7.73 | 2.80E-19 | 1.16E-18 | grey60 |
| HLA-DRB3  | 3125  | major histocompatibility<br>complex, class II, DR beta 3<br>(HLA-DRB3), mRNA.  | -0.12 | 7.51 | 3.68E-09 | 8.81E-09 | grey60 |

|        |        |                                                                           |       |       |          |          |        |
|--------|--------|---------------------------------------------------------------------------|-------|-------|----------|----------|--------|
| HSPB1  | 3315   | heat shock 27kDa protein 1 (HSPB1), mRNA.                                 | -0.21 | 7.38  | 2.17E-30 | 1.42E-29 | grey60 |
| IGSF3  | 3321   | immunoglobulin superfamily, member 3 (IGSF3), transcript variant 2, mRNA. | -0.12 | 5.77  | 2.17E-10 | 5.57E-10 | grey60 |
| IL10   | 3586   | interleukin 10 (IL10), mRNA.                                              | -0.22 | 8.65  | 1.95E-30 | 1.27E-29 | grey60 |
| IL1R2  | 7850   | interleukin 1 receptor, type II (IL1R2), transcript variant 2, mRNA.      | 0.03  | 6.64  | 2.99E-02 | 4.00E-02 | grey60 |
| JAM2   | 58494  | junctional adhesion molecule 2 (JAM2), mRNA.                              | -0.19 | 10.22 | 4.72E-32 | 3.36E-31 | grey60 |
| KDELC2 | 143888 | KDEL (Lys-Asp-Glu-Leu) containing 2 (KDELC2), mRNA.                       | 0.78  | 8.24  | 4.10E-93 | 1.16E-90 | grey60 |
| MAL    | 4118   | mal, T-cell differentiation protein (MAL), transcript variant a, mRNA.    | -0.05 | 8.65  | 1.38E-05 | 2.60E-05 | grey60 |
| NA     | 8337   | histone cluster 2, H2aa3 (HIST2H2AA3), mRNA.                              | 0.41  | 6.33  | 7.44E-54 | 1.37E-52 | grey60 |
| NA     | 8362   | histone cluster 1, H4k (HIST1H4K), mRNA.                                  | -0.35 | 8.12  | 1.10E-45 | 1.47E-44 | grey60 |
| NA     | 51192  | chemokine-like factor (CKLF), transcript variant 3, mRNA.                 | -0.09 | 8.51  | 9.29E-11 | 2.43E-10 | grey60 |
| NA     | 8544   | pirin (iron-binding nuclear protein) (PIR), transcript variant 1, mRNA.   | -0.04 | 5.63  | 5.39E-03 | 7.91E-03 | grey60 |
| NA     | 8370   | histone cluster 2, H4a (HIST2H4A), mRNA.                                  | 0.02  | 8.04  | 3.85E-01 | 4.31E-01 | grey60 |

|         |        |                                                                                             |       |       |          |          |        |
|---------|--------|---------------------------------------------------------------------------------------------|-------|-------|----------|----------|--------|
| NRCAM   | 4897   | neuronal cell adhesion molecule (NRCAM), transcript variant 1, mRNA.                        | -0.06 | 9.97  | 4.13E-08 | 9.22E-08 | grey60 |
| PHACTR2 | 9749   | phosphatase and actin regulator 2 (PHACTR2), mRNA.                                          | -0.02 | 8.21  | 2.25E-01 | 2.64E-01 | grey60 |
| PITPNC1 | 26207  | phosphatidylinositol transfer protein, cytoplasmic 1 (PITPNC1), transcript variant 2, mRNA. | 0.18  | 9.24  | 3.13E-34 | 2.42E-33 | grey60 |
| PON2    | 5445   | paraoxonase 2 (PON2), transcript variant 2, mRNA.                                           | 0.09  | 8.04  | 4.61E-10 | 1.16E-09 | grey60 |
| PRRX1   | 5396   | paired related homeobox 1 (PRRX1), transcript variant pmx-1a, mRNA.                         | -0.04 | 11.59 | 4.14E-05 | 7.46E-05 | grey60 |
| RPS6KA2 | 6196   | ribosomal protein S6 kinase, 90kDa, polypeptide 2 (RPS6KA2), transcript variant 2, mRNA.    | -0.14 | 7.36  | 1.01E-13 | 3.11E-13 | grey60 |
| RRAGD   | 58528  | Ras-related GTP binding D (RRAGD), mRNA.                                                    | -0.15 | 7.43  | 9.91E-15 | 3.24E-14 | grey60 |
| SETD9   | 133383 | chromosome 5 open reading frame 35 (C5orf35), mRNA.                                         | -0.06 | 7.32  | 2.51E-03 | 3.80E-03 | grey60 |
| TCEAL2  | 140597 | transcription elongation factor A (SII)-like 2 (TCEAL2), mRNA.                              | -0.03 | 9.72  | 1.02E-02 | 1.45E-02 | grey60 |
| TCL1A   | 8115   | T-cell leukemia/lymphoma 1A (TCL1A), mRNA.                                                  | -0.02 | 7.77  | 1.99E-01 | 2.37E-01 | grey60 |
| TGM5    | 9333   | transglutaminase 5 (TGM5), transcript variant 2, mRNA.                                      | -0.12 | 6.53  | 1.10E-14 | 3.57E-14 | grey60 |

|          |        |                                                                                     |       |      |          |          |           |
|----------|--------|-------------------------------------------------------------------------------------|-------|------|----------|----------|-----------|
| TMBIM6   | 7009   | testis enhanced gene transcript (BAX inhibitor 1) (TEGT), mRNA.                     | 0.15  | 6.03 | 3.27E-17 | 1.22E-16 | grey60    |
| TMEM136  | 219902 | transmembrane protein 136 (TMEM136), mRNA.                                          | 0.00  | 7.72 | 9.75E-01 | 9.79E-01 | grey60    |
| TMEM200A | 114801 | KIAA1913 (KIAA1913), mRNA.                                                          | 0.03  | 6.96 | 7.66E-02 | 9.73E-02 | grey60    |
| TSPO     | 706    | translocator protein (18kDa) (TSPO), transcript variant PBR, mRNA.                  | 0.18  | 6.53 | 8.90E-24 | 4.54E-23 | grey60    |
| WWC3     | 55841  | WWC family member 3 (WWC3), mRNA.                                                   | -0.41 | 5.88 | 1.38E-47 | 2.01E-46 | grey60    |
| ZCCHC11  | 23318  | zinc finger, CCHC domain containing 11 (ZCCHC11), transcript variant 3, mRNA.       | 0.77  | 8.66 | 1.56E-66 | 5.97E-65 | grey60    |
| ACCS     | 84680  | 1-aminocyclopropane-1-carboxylate synthase (PHACS), mRNA.                           | -0.04 | 8.34 | 2.57E-03 | 3.89E-03 | lightcyan |
| ACOT9    | 23597  | acyl-CoA thioesterase 9 (ACOT9), transcript variant 2, mRNA.                        | 0.40  | 6.24 | 7.02E-54 | 1.31E-52 | lightcyan |
| AHSA2    | 130872 | AHA1, activator of heat shock 90kDa protein ATPase homolog 2 (yeast) (AHSA2), mRNA. | -0.01 | 9.20 | 4.01E-01 | 4.47E-01 | lightcyan |
| ANAPC1   | 64682  | anaphase promoting complex subunit 1 (ANAPC1), mRNA.                                | 0.01  | 7.47 | 6.04E-01 | 6.46E-01 | lightcyan |
| ANKRD12  | 23253  | ankyrin repeat domain 12 (ANKRD12), mRNA.                                           | 0.40  | 5.85 | 1.53E-46 | 2.12E-45 | lightcyan |
| ARHGAP4  | 393    | Rho GTPase activating protein 4 (ARHGAP4), mRNA.                                    | 0.03  | 8.17 | 2.60E-02 | 3.51E-02 | lightcyan |

|         |        |                                                                                       |       |       |          |          |           |
|---------|--------|---------------------------------------------------------------------------------------|-------|-------|----------|----------|-----------|
| ARHGEF7 | 8874   | Rho guanine nucleotide exchange factor (GEF) 7 (ARHGEF7), transcript variant 1, mRNA. | -0.02 | 7.26  | 3.65E-01 | 4.10E-01 | lightcyan |
| BRPF3   | 27154  | bromodomain and PHD finger containing, 3 (BRPF3), mRNA.                               | -0.30 | 10.65 | 2.89E-54 | 5.54E-53 | lightcyan |
| C2CD5   | 9847   | KIAA0528 (KIAA0528), mRNA.                                                            | -0.25 | 6.77  | 4.04E-23 | 2.00E-22 | lightcyan |
| CAPZB   | 832    | capping protein (actin filament) muscle Z-line, beta (CAPZB), mRNA.                   | -0.01 | 8.29  | 4.23E-01 | 4.69E-01 | lightcyan |
| CCDC14  | 64770  | coiled-coil domain containing 14 (CCDC14), mRNA.                                      | 0.25  | 6.38  | 4.12E-27 | 2.44E-26 | lightcyan |
| CCDC84  | 338657 | coiled-coil domain containing 84 (CCDC84), mRNA.                                      | -0.10 | 7.84  | 1.70E-11 | 4.64E-11 | lightcyan |
| CENPF   | 1063   | centromere protein F, 350/400ka (mitosin) (CENPF), mRNA.                              | 0.28  | 8.71  | 3.48E-42 | 3.91E-41 | lightcyan |
| CEP192  | 55125  | centrosomal protein 192kDa (CEP192), mRNA.                                            | 0.12  | 9.08  | 4.31E-13 | 1.29E-12 | lightcyan |
| CEP83   | 51134  | coiled-coil domain containing 41 (CCDC41), transcript variant 2, mRNA.                | 0.01  | 11.17 | 4.30E-01 | 4.76E-01 | lightcyan |
| CHAMP1  | 283489 | chromosome 13 open reading frame 8 (C13orf8), mRNA.                                   | -0.07 | 7.06  | 1.45E-06 | 2.93E-06 | lightcyan |
| CLDN15  | 24146  | claudin 15 (CLDN15), transcript variant 1, mRNA.                                      | 0.21  | 6.38  | 2.15E-23 | 1.08E-22 | lightcyan |



|          |        |                                                                                   |       |      |          |          |           |
|----------|--------|-----------------------------------------------------------------------------------|-------|------|----------|----------|-----------|
| CNOT1    | 23019  | CCR4-NOT transcription complex, subunit 1 (CNOT1), transcript variant 1, mRNA.    | 0.21  | 8.20 | 4.24E-36 | 3.57E-35 | lightcyan |
| CRIPAK   | 285464 | cysteine-rich PAK1 inhibitor (CRIPAK), mRNA.                                      | 0.02  | 7.33 | 2.96E-01 | 3.40E-01 | lightcyan |
| DDX55    | 57696  | DEAD (Asp-Glu-Ala-Asp) box polypeptide 55 (DDX55), mRNA.                          | -0.01 | 7.50 | 3.71E-01 | 4.16E-01 | lightcyan |
| DIAPH1   | 1729   | diaphanous homolog 1 (Drosophila) (DIAPH1), transcript variant 2, mRNA.           | -0.06 | 7.82 | 2.34E-03 | 3.55E-03 | lightcyan |
| DNAJB2   | 3300   | DnaJ (Hsp40) homolog, subfamily B, member 2 (DNAJB2), transcript variant 1, mRNA. | -0.05 | 9.10 | 1.37E-04 | 2.35E-04 | lightcyan |
| DYNC1LI2 | 1783   | dynein, cytoplasmic 1, light intermediate chain 2 (DYNC1LI2), mRNA.               | -0.02 | 9.92 | 1.28E-01 | 1.57E-01 | lightcyan |
| EIF4A2   | 1974   | eukaryotic translation initiation factor 4A, isoform 2 (EIF4A2), mRNA.            | 0.20  | 6.55 | 3.06E-21 | 1.38E-20 | lightcyan |
| EXOC7    | 23265  | exocyst complex component 7 (EXOC7), transcript variant 2, mRNA.                  | 0.00  | 7.97 | 9.48E-01 | 9.55E-01 | lightcyan |
| FAM13B   | 51306  | chromosome 5 open reading frame 5 (C5orf5), mRNA.                                 | -0.22 | 8.22 | 3.93E-31 | 2.65E-30 | lightcyan |
| FNBP4    | 23360  | formin binding protein 4 (FNBP4), mRNA.                                           | -0.05 | 7.07 | 6.85E-04 | 1.10E-03 | lightcyan |
| GFOD1    | 54438  | glucose-fructose oxidoreductase domain containing 1 (GFOD1), mRNA.                | -0.02 | 9.71 | 7.39E-02 | 9.43E-02 | lightcyan |

|        |       |                                                                                   |       |       |          |          |           |
|--------|-------|-----------------------------------------------------------------------------------|-------|-------|----------|----------|-----------|
| GSE1   | 23199 | KIAA0182 (KIAA0182), mRNA.                                                        | -0.01 | 7.83  | 6.87E-01 | 7.22E-01 | lightcyan |
| GTPBP3 | 84705 | GTP binding protein 3 (mitochondrial) (GTPBP3), transcript variant V, mRNA.       | -0.06 | 8.84  | 4.50E-04 | 7.41E-04 | lightcyan |
| HEATR1 | 55127 | HEAT repeat containing 1 (HEATR1), mRNA.                                          | -0.02 | 7.79  | 1.79E-01 | 2.14E-01 | lightcyan |
| HMBOX1 | 79618 | homeobox containing 1 (HMBOX1), mRNA.                                             | 0.06  | 10.04 | 1.31E-08 | 3.04E-08 | lightcyan |
| ILK    | 3611  | integrin-linked kinase (ILK), transcript variant 3, mRNA.                         | 0.16  | 5.66  | 5.35E-17 | 1.98E-16 | lightcyan |
| KANSL3 | 55683 | hypothetical protein FLJ10081 (FLJ10081), mRNA.                                   | 0.29  | 8.37  | 5.99E-44 | 7.22E-43 | lightcyan |
| KBTD2  | 25948 | kelch repeat and BTB (POZ) domain containing 2 (KBTD2), mRNA.                     | 0.02  | 9.36  | 1.37E-01 | 1.67E-01 | lightcyan |
| KDM2B  | 84678 | F-box and leucine-rich repeat protein 10 (FBXL10), transcript variant 1, mRNA.    | 0.01  | 10.16 | 3.02E-01 | 3.47E-01 | lightcyan |
| KNTC1  | 9735  | kinetochore associated 1 (KNTC1), mRNA.                                           | 0.07  | 7.78  | 3.85E-06 | 7.54E-06 | lightcyan |
| KPNA6  | 23633 | karyopherin alpha 6 (importin alpha 7) (KPNA6), mRNA.                             | 0.11  | 7.86  | 7.35E-07 | 1.51E-06 | lightcyan |
| LAMA5  | 3911  | laminin, alpha 5 (LAMA5), mRNA.                                                   | -0.03 | 6.27  | 4.03E-02 | 5.32E-02 | lightcyan |
| LARP1  | 23367 | La ribonucleoprotein domain family, member 1 (LARP1), transcript variant 2, mRNA. | -0.15 | 8.17  | 1.96E-17 | 7.40E-17 | lightcyan |

|        |        |                                                                                                               |       |       |          |          |           |
|--------|--------|---------------------------------------------------------------------------------------------------------------|-------|-------|----------|----------|-----------|
| LRP5L  | 91355  | low density lipoprotein receptor-related protein 5-like (LRP5L), mRNA.                                        | -0.10 | 6.50  | 6.46E-09 | 1.53E-08 | lightcyan |
| LUC7L3 | 51747  | cisplatin resistance-associated overexpressed protein (CROP), transcript variant 1, mRNA.                     | 0.10  | 10.60 | 7.17E-07 | 1.47E-06 | lightcyan |
| LZTR1  | 8216   | leucine-zipper-like transcription regulator 1 (LZTR1), mRNA.                                                  | 0.01  | 8.03  | 6.11E-01 | 6.52E-01 | lightcyan |
| MACF1  | 23499  | microtubule-actin crosslinking factor 1 (MACF1), transcript variant 1, mRNA.                                  | -0.01 | 6.06  | 6.89E-01 | 7.24E-01 | lightcyan |
| MAT2A  | 4144   | methionine adenosyltransferase II, alpha (MAT2A), mRNA.                                                       | -0.07 | 7.00  | 1.93E-05 | 3.58E-05 | lightcyan |
| MBD6   | 114785 | methyl-CpG binding domain protein 6 (MBD6), mRNA.                                                             | 0.09  | 7.78  | 2.18E-04 | 3.69E-04 | lightcyan |
| MDC1   | 9656   | mediator of DNA damage checkpoint 1 (MDC1), mRNA.                                                             | 0.00  | 8.23  | 9.22E-01 | 9.34E-01 | lightcyan |
| MLLT6  | 4302   | myeloid/lymphoid or mixed-lineage leukemia (trithorax homolog, Drosophila); translocated to, 6 (MLLT6), mRNA. | 0.08  | 7.92  | 6.89E-09 | 1.62E-08 | lightcyan |
| MPPE1  | 65258  | metallophosphoesterase 1 (MPPE1), mRNA.                                                                       | 0.03  | 9.99  | 5.81E-02 | 7.51E-02 | lightcyan |
| MRPS25 | 64432  | mitochondrial ribosomal protein S25 (MRPS25), nuclear gene encoding mitochondrial protein, mRNA.              | 0.01  | 7.16  | 4.21E-01 | 4.67E-01 | lightcyan |

|         |        |                                                                                                       |       |       |          |          |           |
|---------|--------|-------------------------------------------------------------------------------------------------------|-------|-------|----------|----------|-----------|
| MUM1    | 84939  | melanoma associated antigen (mutated) 1 (MUM1), mRNA.                                                 | 0.05  | 7.77  | 9.52E-03 | 1.36E-02 | lightcyan |
| NA      | 54441  | DKFZp434A0131 protein (DKFZP434A0131), transcript variant 1, mRNA.                                    | 0.17  | 8.56  | 9.05E-38 | 8.36E-37 | lightcyan |
| NA      | 9284   | nuclear pore complex interacting protein (NPIP), mRNA.                                                | -0.16 | 9.88  | 2.63E-27 | 1.57E-26 | lightcyan |
| NA      | 8681   | phospholipase A2, group IVB (cytosolic) (PLA2G4B), mRNA.                                              | 0.15  | 7.52  | 1.63E-15 | 5.54E-15 | lightcyan |
| NA      | 22995  | centrosomal protein 152kDa (CEP152), mRNA.                                                            | 0.08  | 7.05  | 3.60E-06 | 7.08E-06 | lightcyan |
| NA      | 442578 | similar to Cohesin subunit SA-3 (Stromal antigen 3) (Stromalin 3) (SCC3 homolog 3) (LOC442578), mRNA. | 0.01  | 9.26  | 2.39E-01 | 2.79E-01 | lightcyan |
| NA      | 400986 | protein immuno-reactive with anti-PTH polyclonal antibodies (LOC400986), mRNA.                        | 0.00  | 8.71  | 8.27E-01 | 8.50E-01 | lightcyan |
| NCKAP1L | 3071   | NCK-associated protein 1-like (NCKAP1L), mRNA.                                                        | -0.26 | 7.41  | 2.39E-30 | 1.56E-29 | lightcyan |
| NCOA6   | 23054  | nuclear receptor coactivator 6 (NCOA6), mRNA.                                                         | -0.12 | 8.35  | 3.30E-16 | 1.17E-15 | lightcyan |
| NISCH   | 11188  | nischarin (NISCH), mRNA.                                                                              | 0.06  | 11.01 | 1.19E-05 | 2.26E-05 | lightcyan |
| NKTR    | 4820   | natural killer-tumor recognition sequence (NKTR), transcript variant 1, mRNA.                         | 0.08  | 9.32  | 2.57E-08 | 5.82E-08 | lightcyan |

|        |        |                                                                                                                                                             |       |       |          |          |           |
|--------|--------|-------------------------------------------------------------------------------------------------------------------------------------------------------------|-------|-------|----------|----------|-----------|
| NPIPB9 | 728734 | PREDICTED: similar to kidney-specific protein (KS), transcript variant 2 (LOC728734), mRNA.                                                                 | -0.04 | 7.39  | 2.99E-03 | 4.50E-03 | lightcyan |
| OGT    | 8473   | O-linked N-acetylglucosamine (GlcNAc) transferase (UDP-N-acetylglucosamine:polypeptide-N-acetylglucosaminyl transferase) (OGT), transcript variant 2, mRNA. | 0.13  | 5.90  | 1.65E-15 | 5.60E-15 | lightcyan |
| OSBPL7 | 114881 | oxysterol binding protein-like 7 (OSBPL7), transcript variant 1, mRNA.                                                                                      | -0.07 | 8.44  | 1.98E-08 | 4.52E-08 | lightcyan |
| PCNT   | 5116   | pericentrin (kendrin) (PCNT), mRNA.                                                                                                                         | 0.00  | 9.29  | 8.23E-01 | 8.48E-01 | lightcyan |
| PDCD11 | 22984  | programmed cell death 11 (PDCD11), mRNA.                                                                                                                    | 0.04  | 8.58  | 1.58E-03 | 2.44E-03 | lightcyan |
| PHF19  | 26147  | PHD finger protein 19 (PHF19), transcript variant 1, mRNA.                                                                                                  | -0.09 | 7.12  | 2.74E-10 | 7.02E-10 | lightcyan |
| PIEZO1 | 9780   | family with sequence similarity 38, member A (FAM38A), mRNA.                                                                                                | 0.04  | 7.18  | 9.39E-04 | 1.49E-03 | lightcyan |
| POLQ   | 10721  | polymerase (DNA directed), theta (POLQ), mRNA.                                                                                                              | -0.09 | 10.29 | 5.17E-05 | 9.22E-05 | lightcyan |
| PSME4  | 23198  | proteasome (prosome, macropain) activator subunit 4 (PSME4), mRNA.                                                                                          | 0.03  | 7.48  | 8.46E-03 | 1.22E-02 | lightcyan |
| QSOX2  | 169714 | quiescin Q6-like 1 (QSCN6L1), mRNA.                                                                                                                         | 0.02  | 8.43  | 2.09E-01 | 2.47E-01 | lightcyan |

|         |        |                                                                                          |       |      |          |          |           |
|---------|--------|------------------------------------------------------------------------------------------|-------|------|----------|----------|-----------|
| RAD54L2 | 23132  | RAD54-like 2 ( <i>S. cerevisiae</i> ) (RAD54L2), mRNA.                                   | -0.04 | 9.33 | 7.65E-04 | 1.23E-03 | lightcyan |
| RBM25   | 58517  | RNA binding motif protein 25 (RBM25), mRNA.                                              | -0.03 | 9.24 | 1.66E-02 | 2.29E-02 | lightcyan |
| RBM33   | 155435 | RNA binding motif protein 33 (RBM33), mRNA.                                              | 0.08  | 7.34 | 3.63E-04 | 6.02E-04 | lightcyan |
| RBM5    | 10181  | RNA binding motif protein 5 (RBM5), mRNA.                                                | 0.03  | 7.79 | 1.72E-01 | 2.07E-01 | lightcyan |
| RNASEH1 | 246243 | ribonuclease H1 (RNASEH1), mRNA.                                                         | -0.09 | 7.60 | 3.57E-07 | 7.51E-07 | lightcyan |
| RNF19A  | 25897  | ring finger protein 19 (RNF19), transcript variant 2, mRNA.                              | -0.21 | 7.33 | 1.15E-30 | 7.63E-30 | lightcyan |
| RPS6KA1 | 6195   | ribosomal protein S6 kinase, 90kDa, polypeptide 1 (RPS6KA1), transcript variant 2, mRNA. | -0.07 | 9.87 | 8.66E-10 | 2.15E-09 | lightcyan |
| RSRP1   | 57035  | chromosome 1 open reading frame 63 (C1orf63), mRNA.                                      | 0.06  | 9.31 | 5.59E-04 | 9.10E-04 | lightcyan |
| SCAP    | 22937  | SREBF chaperone (SCAP), mRNA.                                                            | 0.19  | 7.24 | 5.36E-27 | 3.14E-26 | lightcyan |
| SETD2   | 29072  | SET domain containing 2 (SETD2), mRNA.                                                   | -0.04 | 6.62 | 2.11E-02 | 2.89E-02 | lightcyan |
| SF3B3   | 23450  | splicing factor 3b, subunit 3, 130kDa (SF3B3), mRNA.                                     | -0.01 | 9.30 | 5.41E-01 | 5.86E-01 | lightcyan |
| SKIV2L  | 6499   | superkiller viralicidic activity 2-like ( <i>S. cerevisiae</i> ) (SKIV2L), mRNA.         | 0.21  | 8.17 | 2.24E-39 | 2.19E-38 | lightcyan |
| SMG1    | 23049  | PI-3-kinase-related kinase SMG-1 (SMG1), mRNA.                                           | 0.01  | 7.57 | 4.89E-01 | 5.35E-01 | lightcyan |

|          |        |                                                                                                                    |       |       |          |          |           |
|----------|--------|--------------------------------------------------------------------------------------------------------------------|-------|-------|----------|----------|-----------|
| SND1-IT1 | 27099  | nasopharyngeal carcinoma associated gene protein-8 (NAG8), mRNA.                                                   | -0.36 | 8.46  | 4.21E-62 | 1.30E-60 | lightcyan |
| SNORA25  | 684959 | small nucleolar RNA, H/ACA box 25 (SNORA25) on chromosome 11.                                                      | 0.18  | 7.56  | 1.49E-23 | 7.51E-23 | lightcyan |
| SPEN     | 23013  | spen homolog, transcriptional regulator (Drosophila) (SPEN), mRNA.                                                 | 0.01  | 6.95  | 5.23E-01 | 5.67E-01 | lightcyan |
| STK35    | 140901 | serine/threonine kinase 35 (STK35), mRNA.                                                                          | 0.77  | 7.42  | 1.16E-57 | 2.72E-56 | lightcyan |
| STK36    | 27148  | serine/threonine kinase 36, fused homolog (Drosophila) (STK36), mRNA.                                              | -0.15 | 7.84  | 5.50E-17 | 2.04E-16 | lightcyan |
| SUGP2    | 10147  | splicing factor, arginine/serine-rich 14 (SFRS14), transcript variant 2, mRNA.                                     | 0.12  | 11.19 | 4.29E-11 | 1.14E-10 | lightcyan |
| TAF1C    | 9013   | TATA box binding protein (TBP)-associated factor, RNA polymerase I, C, 110kDa (TAF1C), transcript variant 1, mRNA. | -0.33 | 8.21  | 1.74E-32 | 1.26E-31 | lightcyan |
| TARBP1   | 6894   | Tar (HIV-1) RNA binding protein 1 (TARBP1), mRNA.                                                                  | 0.01  | 10.76 | 5.41E-01 | 5.86E-01 | lightcyan |
| TRRAP    | 8295   | transformation/transcription domain-associated protein (TRRAP), mRNA.                                              | 0.22  | 7.46  | 4.17E-50 | 6.58E-49 | lightcyan |
| UBE2G2   | 7327   | ubiquitin-conjugating enzyme E2G 2 (UBC7 homolog, yeast) (UBE2G2), transcript variant 1, mRNA.                     | -0.02 | 7.80  | 1.44E-01 | 1.76E-01 | lightcyan |

|         |        |                                                                                                      |       |       |          |          |            |
|---------|--------|------------------------------------------------------------------------------------------------------|-------|-------|----------|----------|------------|
| USB1    | 79650  | chromosome 16 open reading frame 57 (C16orf57), mRNA.                                                | 0.06  | 9.16  | 1.16E-02 | 1.63E-02 | lightcyan  |
| VAMP1   | 6843   | vesicle-associated membrane protein 1 (synaptobrevin 1) (VAMP1), transcript variant 3, mRNA.         | 0.07  | 9.15  | 2.09E-05 | 3.87E-05 | lightcyan  |
| VEZF1   | 7716   | vascular endothelial zinc finger 1 (VEZF1), mRNA.                                                    | 0.17  | 10.54 | 1.37E-12 | 3.99E-12 | lightcyan  |
| WDR19   | 57728  | WD repeat domain 19 (WDR19), mRNA.                                                                   | -0.39 | 8.08  | 7.47E-67 | 2.87E-65 | lightcyan  |
| XPO4    | 64328  | exportin 4 (XPO4), mRNA.                                                                             | 0.88  | 5.81  | 1.30E-56 | 2.85E-55 | lightcyan  |
| ZFHX3   | 463    | AT-binding transcription factor 1 (ATBF1), mRNA.                                                     | 0.01  | 6.27  | 7.22E-01 | 7.55E-01 | lightcyan  |
| AGA     | 175    | aspartylglucosaminidase (AGA), mRNA.                                                                 | -0.01 | 9.19  | 5.32E-01 | 5.77E-01 | lightgreen |
| ALCAM   | 214    | activated leukocyte cell adhesion molecule (ALCAM), mRNA.                                            | -0.29 | 5.95  | 4.31E-34 | 3.29E-33 | lightgreen |
| ARID5B  | 84159  | AT rich interactive domain 5B (MRF1-like) (ARID5B), mRNA.                                            | 0.10  | 6.55  | 2.62E-08 | 5.93E-08 | lightgreen |
| BPHL    | 670    | biphenyl hydrolase-like (serine hydrolase; breast epithelial mucin-associated antigen) (BPHL), mRNA. | -0.40 | 6.20  | 4.89E-57 | 1.10E-55 | lightgreen |
| C1GALT1 | 56913  | core 1 synthase, glycoprotein-N-acetylgalactosamine 3-beta-galactosyltransferase, 1 (C1GALT1), mRNA. | -0.29 | 6.80  | 2.17E-45 | 2.84E-44 | lightgreen |
| CCDC12  | 151903 | coiled-coil domain containing 12 (CCDC12), mRNA.                                                     | -0.08 | 6.99  | 1.51E-07 | 3.25E-07 | lightgreen |



|         |        |                                                                                                        |       |      |          |          |            |
|---------|--------|--------------------------------------------------------------------------------------------------------|-------|------|----------|----------|------------|
| CCNC    | 892    | cyclin C (CCNC), transcript variant 1, mRNA.                                                           | -0.20 | 8.71 | 8.09E-28 | 4.92E-27 | lightgreen |
| CENPV   | 201161 | proline rich 6 (PRR6), mRNA.                                                                           | 0.06  | 7.78 | 1.16E-06 | 2.35E-06 | lightgreen |
| CLEC2D  | 29121  | C-type lectin domain family 2, member D (CLEC2D), transcript variant 2, mRNA.                          | -0.25 | 7.82 | 5.60E-35 | 4.46E-34 | lightgreen |
| CMBL    | 134147 | carboxymethylenebutenolidase homolog (Pseudomonas) (CMBL), mRNA.                                       | 0.12  | 5.99 | 2.21E-11 | 6.01E-11 | lightgreen |
| COPRS   | 55352  | chromosome 17 open reading frame 79 (C17orf79), mRNA.                                                  | -0.04 | 5.94 | 1.13E-03 | 1.78E-03 | lightgreen |
| DERL1   | 79139  | Der1-like domain family, member 1 (DERL1), mRNA.                                                       | 0.10  | 9.64 | 2.88E-16 | 1.02E-15 | lightgreen |
| EIF2AK3 | 9451   | eukaryotic translation initiation factor 2-alpha kinase 3 (EIF2AK3), mRNA.                             | -0.08 | 7.19 | 1.49E-07 | 3.21E-07 | lightgreen |
| EMC7    | 56851  | chromosome 15 open reading frame 24 (C15orf24), mRNA.                                                  | 0.14  | 9.64 | 8.08E-13 | 2.38E-12 | lightgreen |
| FNDC3A  | 22862  | fibronectin type III domain containing 3A (FNDC3A), transcript variant 2, mRNA.                        | -0.11 | 6.55 | 1.17E-12 | 3.43E-12 | lightgreen |
| FUT8    | 2530   | fucosyltransferase 8 (alpha (1,6) fucosyltransferase) (FUT8), transcript variant 2, mRNA.              | -0.05 | 7.47 | 7.05E-05 | 1.25E-04 | lightgreen |
| GNAI3   | 2773   | guanine nucleotide binding protein (G protein), alpha inhibiting activity polypeptide 3 (GNAI3), mRNA. | 0.13  | 7.43 | 4.37E-16 | 1.53E-15 | lightgreen |

|          |       |                                                                         |       |       |          |          |            |
|----------|-------|-------------------------------------------------------------------------|-------|-------|----------|----------|------------|
| GNG11    | 2791  | guanine nucleotide binding protein (G protein), gamma 11 (GNG11), mRNA. | -0.02 | 8.78  | 1.17E-01 | 1.44E-01 | lightgreen |
| GOLPH3L  | 55204 | golgi phosphoprotein 3-like (GOLPH3L), mRNA.                            | 0.60  | 8.24  | 5.80E-64 | 2.00E-62 | lightgreen |
| GSTA4    | 2941  | glutathione S-transferase A4 (GSTA4), mRNA.                             | -0.04 | 5.99  | 2.94E-02 | 3.94E-02 | lightgreen |
| HNRNPLL  | 92906 | heterogeneous nuclear ribonucleoprotein L-like (HNRPLL), mRNA.          | -0.02 | 5.93  | 2.44E-01 | 2.84E-01 | lightgreen |
| HS2ST1   | 9653  | heparan sulfate 2-O-sulfotransferase 1 (HS2ST1), mRNA.                  | 0.07  | 5.99  | 3.72E-05 | 6.72E-05 | lightgreen |
| ICA1     | 3382  | islet cell autoantigen 1, 69kDa (ICA1), transcript variant 1, mRNA.     | 0.00  | 8.58  | 9.43E-01 | 9.52E-01 | lightgreen |
| INSIG2   | 51141 | insulin induced gene 2 (INSIG2), mRNA.                                  | -0.01 | 7.14  | 3.86E-01 | 4.32E-01 | lightgreen |
| IRF8     | 3394  | interferon regulatory factor 8 (IRF8), mRNA.                            | 0.25  | 5.68  | 3.35E-39 | 3.24E-38 | lightgreen |
| ITM2A    | 9452  | integral membrane protein 2A (ITM2A), mRNA.                             | 0.26  | 10.11 | 1.05E-37 | 9.64E-37 | lightgreen |
| KIAA0922 | 23240 | KIAA0922 (KIAA0922), mRNA.                                              | -0.08 | 6.69  | 8.94E-11 | 2.35E-10 | lightgreen |
| LMBRD1   | 55788 | LMBR1 domain containing 1 (LMBRD1), mRNA.                               | -1.30 | 7.55  | 4.70E-86 | 6.63E-84 | lightgreen |
| MBNL2    | 10150 | muscleblind-like 2 (Drosophila) (MBNL2), transcript variant 1, mRNA.    | 0.43  | 8.36  | 3.16E-56 | 6.76E-55 | lightgreen |

|         |        |                                                                                              |       |      |          |          |            |
|---------|--------|----------------------------------------------------------------------------------------------|-------|------|----------|----------|------------|
| MGST2   | 4258   | microsomal glutathione S-transferase 2 (MGST2), mRNA.                                        | -0.01 | 9.09 | 5.11E-01 | 5.56E-01 | lightgreen |
| MTDH    | 92140  | metadherin (MTDH), mRNA.                                                                     | 0.00  | 8.63 | 8.16E-01 | 8.41E-01 | lightgreen |
| NA      | 124944 | chromosome 17 open reading frame 49 (C17orf49), mRNA.                                        | 0.04  | 8.45 | 8.62E-03 | 1.24E-02 | lightgreen |
| NASP    | 4678   | nuclear autoantigenic sperm protein (histone-binding) (NASP), transcript variant 1, mRNA.    | -0.07 | 8.21 | 2.25E-07 | 4.79E-07 | lightgreen |
| NME4    | 4833   | non-metastatic cells 4, protein expressed in (NME4), mRNA.                                   | -0.57 | 9.58 | 5.42E-68 | 2.18E-66 | lightgreen |
| NR2F6   | 2063   | nuclear receptor subfamily 2, group F, member 6 (NR2F6), mRNA.                               | 0.22  | 7.98 | 3.54E-32 | 2.53E-31 | lightgreen |
| NRD1    | 4898   | nardilysin (N-arginine dibasic convertase) (NRD1), mRNA.                                     | 0.01  | 7.22 | 4.69E-01 | 5.14E-01 | lightgreen |
| NUCB2   | 4925   | nucleobindin 2 (NUCB2), mRNA.                                                                | -0.63 | 6.36 | 1.95E-62 | 6.14E-61 | lightgreen |
| PAPSS1  | 9061   | 3'-phosphoadenosine 5'-phosphosulfate synthase 1 (PAPSS1), mRNA.                             | 0.02  | 7.99 | 1.08E-01 | 1.34E-01 | lightgreen |
| PELI1   | 57162  | pellino homolog 1 (Drosophila) (PELI1), mRNA.                                                | -0.20 | 7.60 | 2.19E-25 | 1.21E-24 | lightgreen |
| PLEKHF1 | 79156  | pleckstrin homology domain containing, family F (with FYVE domain) member 1 (PLEKHF1), mRNA. | -0.15 | 6.33 | 6.85E-12 | 1.91E-11 | lightgreen |

|          |        |                                                                                                                            |       |       |          |          |            |
|----------|--------|----------------------------------------------------------------------------------------------------------------------------|-------|-------|----------|----------|------------|
| PRKRIR   | 5612   | protein-kinase, interferon-inducible double stranded RNA dependent inhibitor, repressor of (P58 repressor) (PRKRIR), mRNA. | 1.08  | 6.25  | 1.16E-63 | 3.96E-62 | lightgreen |
| PRRC1    | 133619 | proline-rich coiled-coil 1 (PRRC1), mRNA.                                                                                  | -0.13 | 8.89  | 1.67E-21 | 7.62E-21 | lightgreen |
| RAD51AP1 | 10635  | RAD51 associated protein 1 (RAD51AP1), mRNA.                                                                               | 0.21  | 10.20 | 9.15E-35 | 7.19E-34 | lightgreen |
| RPN2     | 6185   | ribophorin II (RPN2), mRNA.                                                                                                | 0.14  | 7.93  | 4.53E-17 | 1.68E-16 | lightgreen |
| SAR1B    | 51128  | SAR1 gene homolog B (S. cerevisiae) (SAR1B), transcript variant 2, mRNA.                                                   | -0.07 | 8.99  | 1.59E-05 | 2.98E-05 | lightgreen |
| SARAF    | 51669  | transmembrane protein 66 (TMEM66), mRNA.                                                                                   | -0.03 | 9.18  | 9.27E-02 | 1.17E-01 | lightgreen |
| SCCPDH   | 51097  | saccharopine dehydrogenase (putative) (SCCPDH), mRNA.                                                                      | 0.01  | 10.20 | 3.40E-01 | 3.84E-01 | lightgreen |
| SEC11C   | 90701  | SEC11 homolog C (S. cerevisiae) (SEC11C), mRNA.                                                                            | -0.12 | 9.46  | 6.72E-14 | 2.10E-13 | lightgreen |
| SEC24D   | 9871   | SEC24 related gene family, member D (S. cerevisiae) (SEC24D), mRNA.                                                        | -0.41 | 9.11  | 2.28E-60 | 6.39E-59 | lightgreen |
| SERP1    | 27230  | stress-associated endoplasmic reticulum protein 1 (SERP1), mRNA.                                                           | 0.10  | 7.04  | 3.23E-12 | 9.20E-12 | lightgreen |
| SLC25A46 | 91137  | solute carrier family 25, member 46 (SLC25A46), mRNA.                                                                      | 0.11  | 6.68  | 1.48E-08 | 3.40E-08 | lightgreen |

|         |        |                                                                                                  |       |       |          |          |            |
|---------|--------|--------------------------------------------------------------------------------------------------|-------|-------|----------|----------|------------|
| SLC30A5 | 64924  | solute carrier family 30 (zinc transporter), member 5 (SLC30A5), transcript variant 1, mRNA.     | -0.40 | 10.43 | 1.67E-42 | 1.92E-41 | lightgreen |
| SLC33A1 | 9197   | solute carrier family 33 (acetyl-CoA transporter), member 1 (SLC33A1), mRNA.                     | -0.14 | 6.05  | 1.08E-13 | 3.32E-13 | lightgreen |
| SRP72   | 6731   | signal recognition particle 72kDa (SRP72), mRNA.                                                 | -0.23 | 7.20  | 3.04E-22 | 1.43E-21 | lightgreen |
| STARD10 | 10809  | START domain containing 10 (STARD10), mRNA.                                                      | -0.11 | 7.21  | 2.99E-09 | 7.19E-09 | lightgreen |
| STT3A   | 3703   | STT3, subunit of the oligosaccharyltransferase complex, homolog A (S. cerevisiae) (STT3A), mRNA. | -0.07 | 7.20  | 2.19E-04 | 3.70E-04 | lightgreen |
| TBC1D7  | 51256  | TBC1 domain family, member 7 (TBC1D7), mRNA.                                                     | 0.29  | 7.88  | 9.27E-47 | 1.30E-45 | lightgreen |
| TIMP1   | 7076   | TIMP metalloproteinase inhibitor 1 (TIMP1), mRNA.                                                | 0.12  | 5.40  | 5.44E-11 | 1.44E-10 | lightgreen |
| TMED2   | 10959  | transmembrane emp24 domain trafficking protein 2 (TMED2), mRNA.                                  | 0.48  | 7.76  | 1.35E-67 | 5.38E-66 | lightgreen |
| TMED7   | 51014  | transmembrane emp24 protein transport domain containing 7 (TMED7), mRNA.                         | -0.21 | 6.93  | 5.81E-32 | 4.11E-31 | lightgreen |
| TMEM154 | 201799 | transmembrane protein 154 (TMEM154), mRNA.                                                       | -0.26 | 6.70  | 1.52E-22 | 7.28E-22 | lightgreen |

|          |        |                                                                                    |       |       |          |          |             |
|----------|--------|------------------------------------------------------------------------------------|-------|-------|----------|----------|-------------|
| TNIP1    | 10318  | TNFAIP3 interacting protein 1 (TNIP1), mRNA.                                       | 0.14  | 7.95  | 3.89E-13 | 1.17E-12 | lightgreen  |
| TRAM1    | 23471  | translocation associated membrane protein 1 (TRAM1), mRNA.                         | 0.07  | 7.61  | 1.84E-05 | 3.43E-05 | lightgreen  |
| TTC37    | 9652   | KIAA0372 (KIAA0372), mRNA.                                                         | 0.01  | 6.52  | 3.44E-01 | 3.89E-01 | lightgreen  |
| UAP1     | 6675   | UDP-N-acteylglucosamine pyrophosphorylase 1 (UAP1), mRNA.                          | 0.04  | 9.51  | 9.20E-05 | 1.61E-04 | lightgreen  |
| UBAC1    | 10422  | ubiquitin associated domain containing 1 (UBADC1), mRNA.                           | -0.01 | 12.63 | 6.61E-01 | 6.98E-01 | lightgreen  |
| UBR5     | 51366  | E3 ubiquitin protein ligase, HECT domain containing, 1 (EDD1), mRNA.               | -0.06 | 5.73  | 6.75E-05 | 1.19E-04 | lightgreen  |
| UBTD2    | 92181  | ubiquitin domain containing 2 (UBTD2), mRNA.                                       | 0.07  | 6.63  | 2.51E-06 | 4.97E-06 | lightgreen  |
| UBXN1    | 51035  | SAPK substrate protein 1 (LOC51035), mRNA.                                         | 0.00  | 9.52  | 8.82E-01 | 8.99E-01 | lightgreen  |
| USO1     | 8615   | vesicle docking protein p115 (VDP), mRNA.                                          | -0.12 | 6.94  | 9.88E-18 | 3.79E-17 | lightgreen  |
| VGLL4    | 9686   | vestigial like 4 (Drosophila) (VGLL4), mRNA.                                       | 0.03  | 9.24  | 1.71E-02 | 2.36E-02 | lightgreen  |
| AK3      | 50808  | adenylate kinase 3 (AK3), mRNA.                                                    | -0.03 | 9.26  | 7.39E-02 | 9.43E-02 | lightyellow |
| ALDH16A1 | 126133 | aldehyde dehydrogenase 16 family, member A1 (ALDH16A1), mRNA.                      | 0.03  | 7.28  | 5.72E-02 | 7.40E-02 | lightyellow |
| ASPM     | 259266 | asp (abnormal spindle) homolog, microcephaly associated (Drosophila) (ASPM), mRNA. | 0.00  | 6.76  | 9.67E-01 | 9.73E-01 | lightyellow |

|          |       |                                                                                                   |       |      |          |          |              |
|----------|-------|---------------------------------------------------------------------------------------------------|-------|------|----------|----------|--------------|
| AURKA    | 6790  | aurora kinase A (AURKA), transcript variant 5, mRNA.                                              | -0.16 | 6.61 | 3.82E-24 | 1.99E-23 | lightyelloww |
| BORA     | 79866 | chromosome 13 open reading frame 34 (C13orf34), mRNA.                                             | 0.04  | 9.05 | 5.61E-03 | 8.21E-03 | lightyelloww |
| BUB1     | 699   | BUB1 budding uninhibited by benzimidazoles 1 homolog (yeast) (BUB1), mRNA.                        | 0.09  | 7.86 | 1.24E-05 | 2.34E-05 | lightyelloww |
| BUB1B    | 701   | BUB1 budding uninhibited by benzimidazoles 1 homolog beta (yeast) (BUB1B), mRNA.                  | -0.09 | 6.74 | 6.27E-06 | 1.21E-05 | lightyelloww |
| C12orf43 | 64897 | chromosome 12 open reading frame 43 (C12orf43), mRNA.                                             | 0.12  | 7.64 | 2.24E-05 | 4.13E-05 | lightyelloww |
| CCL17    | 6361  | chemokine (C-C motif) ligand 17 (CCL17), mRNA.                                                    | 0.12  | 9.30 | 2.64E-11 | 7.14E-11 | lightyelloww |
| CCNA2    | 890   | cyclin A2 (CCNA2), mRNA.                                                                          | -0.02 | 7.60 | 1.60E-01 | 1.93E-01 | lightyelloww |
| CCNB2    | 9133  | cyclin B2 (CCNB2), mRNA.                                                                          | 0.01  | 8.25 | 5.10E-01 | 5.55E-01 | lightyelloww |
| CCNF     | 899   | cyclin F (CCNF), mRNA.                                                                            | 0.03  | 9.59 | 1.13E-02 | 1.60E-02 | lightyelloww |
| CDCA3    | 83461 | cell division cycle associated 3 (CDCA3), mRNA.                                                   | 0.06  | 8.60 | 2.12E-05 | 3.91E-05 | lightyelloww |
| CDKN3    | 1033  | cyclin-dependent kinase inhibitor 3 (CDK2-associated dual specificity phosphatase) (CDKN3), mRNA. | 0.31  | 6.18 | 8.57E-40 | 8.51E-39 | lightyelloww |
| CENPA    | 1058  | centromere protein A (CENPA), transcript variant 1, mRNA.                                         | -0.01 | 7.40 | 4.79E-01 | 5.24E-01 | lightyelloww |
| CENPE    | 1062  | centromere protein E, 312kDa (CENPE), mRNA.                                                       | -0.09 | 7.38 | 1.69E-09 | 4.11E-09 | lightyelloww |

|          |        |                                                                                   |       |       |          |          |              |
|----------|--------|-----------------------------------------------------------------------------------|-------|-------|----------|----------|--------------|
| CEP55    | 55165  | centrosomal protein 55kDa (CEP55), mRNA.                                          | -0.05 | 7.12  | 2.98E-04 | 4.97E-04 | lightyelloww |
| CGN      | 57530  | cingulin (CGN), mRNA.                                                             | 0.05  | 8.23  | 2.87E-04 | 4.81E-04 | lightyelloww |
| DLGAP5   | 9787   | discs, large homolog 7 (Drosophila) (DLG7), mRNA.                                 | 0.05  | 8.53  | 5.57E-04 | 9.07E-04 | lightyelloww |
| DOCK11   | 139818 | dedicator of cytokinesis 11 (DOCK11), mRNA.                                       | 0.05  | 9.24  | 1.15E-02 | 1.62E-02 | lightyelloww |
| HLA-DRB4 | 3126   | major histocompatibility complex, class II, DR beta 4 (HLA-DRB4), mRNA.           | -0.06 | 5.38  | 1.03E-03 | 1.62E-03 | lightyelloww |
| HMMR     | 3161   | hyaluronan-mediated motility receptor (RHAMM) (HMMR), transcript variant 2, mRNA. | -0.02 | 9.60  | 1.09E-01 | 1.36E-01 | lightyelloww |
| ITPRIP   | 85450  | KIAA1754 (KIAA1754), mRNA.                                                        | -0.01 | 6.58  | 6.15E-01 | 6.56E-01 | lightyelloww |
| KIF11    | 3832   | kinesin family member 11 (KIF11), mRNA.                                           | -0.02 | 7.21  | 3.08E-01 | 3.52E-01 | lightyelloww |
| KIF14    | 9928   | kinesin family member 14 (KIF14), mRNA.                                           | -0.01 | 12.27 | 7.09E-01 | 7.43E-01 | lightyelloww |
| KIF15    | 56992  | kinesin family member 15 (KIF15), mRNA.                                           | 0.00  | 12.48 | 7.59E-01 | 7.89E-01 | lightyelloww |
| KIF20A   | 10112  | kinesin family member 20A (KIF20A), mRNA.                                         | -0.13 | 6.61  | 2.72E-16 | 9.64E-16 | lightyelloww |
| LBR      | 3930   | lamin B receptor (LBR), transcript variant 1, mRNA.                               | 0.12  | 6.63  | 8.79E-08 | 1.92E-07 | lightyelloww |
| MLH1     | 4292   | mutL homolog 1, colon cancer, nonpolyposis type 2 (E. coli) (MLH1), mRNA.         | -0.03 | 6.96  | 1.90E-01 | 2.27E-01 | lightyelloww |



|        |        |                                                                                  |       |       |          |          |             |
|--------|--------|----------------------------------------------------------------------------------|-------|-------|----------|----------|-------------|
| NCAPG  | 64151  | non-SMC condensin I complex, subunit G (NCAPG), mRNA.                            | 0.05  | 11.07 | 8.23E-04 | 1.32E-03 | lightyellow |
| NDC1   | 55706  | transmembrane protein 48 (TMEM48), mRNA.                                         | 0.06  | 9.18  | 5.59E-04 | 9.10E-04 | lightyellow |
| NUSAP1 | 51203  | nucleolar and spindle associated protein 1 (NUSAP1), transcript variant 1, mRNA. | -0.08 | 8.44  | 3.48E-07 | 7.32E-07 | lightyellow |
| PEX11B | 8799   | peroxisomal biogenesis factor 11B (PEX11B), mRNA.                                | -0.21 | 6.22  | 2.62E-26 | 1.49E-25 | lightyellow |
| PLK1   | 5347   | polo-like kinase 1 (Drosophila) (PLK1), mRNA.                                    | -0.08 | 7.23  | 1.30E-05 | 2.44E-05 | lightyellow |
| PLK4   | 10733  | polo-like kinase 4 (Drosophila) (PLK4), mRNA.                                    | -0.02 | 10.59 | 2.07E-01 | 2.45E-01 | lightyellow |
| PRC1   | 9055   | protein regulator of cytokinesis 1 (PRC1), transcript variant 1, mRNA.           | 0.07  | 8.32  | 9.88E-07 | 2.01E-06 | lightyellow |
| SORBS2 | 8470   | sorbin and SH3 domain containing 2 (SORBS2), transcript variant 2, mRNA.         | -0.11 | 6.09  | 1.88E-09 | 4.56E-09 | lightyellow |
| SPAG5  | 10615  | sperm associated antigen 5 (SPAG5), mRNA.                                        | 0.04  | 10.95 | 1.68E-02 | 2.32E-02 | lightyellow |
| SPRYD4 | 283377 | SPRY domain containing 4 (SPRYD4), mRNA.                                         | 0.05  | 8.30  | 1.44E-06 | 2.91E-06 | lightyellow |
| STIL   | 6491   | SCL/TAL1 interrupting locus (STIL), transcript variant 1, mRNA.                  | -0.01 | 9.22  | 6.70E-01 | 7.06E-01 | lightyellow |
| TOP2A  | 7153   | topoisomerase (DNA) II alpha 170kDa (TOP2A), mRNA.                               | -0.15 | 8.70  | 4.03E-21 | 1.81E-20 | lightyellow |
| TTK    | 7272   | TTK protein kinase (TTK), mRNA.                                                  | 0.02  | 5.58  | 1.86E-01 | 2.22E-01 | lightyellow |

|        |       |                                                                                                    |       |       |           |           |             |
|--------|-------|----------------------------------------------------------------------------------------------------|-------|-------|-----------|-----------|-------------|
| UBE2C  | 11065 | ubiquitin-conjugating enzyme E2C (UBE2C), transcript variant 6, mRNA.                              | 0.14  | 7.55  | 6.77E-10  | 1.69E-09  | lightyellow |
| AAAS   | 8086  | achalasia, adrenocortical insufficiency, alacrimia (Allgrove, triple-A) (AAAS), mRNA.              | -0.04 | 8.33  | 1.67E-03  | 2.58E-03  | magenta     |
| ACTB   | 60    | actin, beta (ACTB), mRNA.                                                                          | 1.54  | 10.19 | 2.62E-116 | 6.64E-113 | magenta     |
| AKR1A1 | 10327 | aldo-keto reductase family 1, member A1 (aldehyde reductase) (AKR1A1), transcript variant 1, mRNA. | -0.09 | 8.78  | 6.81E-07  | 1.40E-06  | magenta     |
| AP2B1  | 163   | adaptor-related protein complex 2, beta 1 subunit (AP2B1), transcript variant 1, mRNA.             | 0.19  | 8.00  | 1.41E-23  | 7.14E-23  | magenta     |
| AP2M1  | 1173  | adaptor-related protein complex 2, mu 1 subunit (AP2M1), transcript variant 2, mRNA.               | -0.14 | 10.00 | 7.35E-15  | 2.41E-14  | magenta     |
| AP3B1  | 8546  | adaptor-related protein complex 3, beta 1 subunit (AP3B1), mRNA.                                   | 0.02  | 8.38  | 1.80E-02  | 2.47E-02  | magenta     |
| APH1A  | 51107 | anterior pharynx defective 1 homolog A (C. elegans) (APH1A), transcript variant 2, mRNA.           | -0.31 | 6.51  | 5.06E-55  | 1.01E-53  | magenta     |
| AQR    | 9716  | aquarius homolog (mouse) (AQR), mRNA.                                                              | 0.10  | 7.19  | 3.01E-09  | 7.24E-09  | magenta     |
| ARPP19 | 10776 | cyclic AMP phosphoprotein, 19 kD (ARPP-19), mRNA.                                                  | 0.03  | 7.54  | 3.46E-02  | 4.61E-02  | magenta     |

|           |        |                                                                                                                                                                      |       |      |          |          |         |
|-----------|--------|----------------------------------------------------------------------------------------------------------------------------------------------------------------------|-------|------|----------|----------|---------|
| ATG101    | 60673  | chromosome 12 open reading frame 44 (C12orf44), mRNA.                                                                                                                | 0.04  | 9.56 | 3.22E-02 | 4.29E-02 | magenta |
| ATP5D     | 513    | ATP synthase, H <sup>+</sup> transporting, mitochondrial F1 complex, delta subunit (ATP5D), nuclear gene encoding mitochondrial protein, transcript variant 2, mRNA. | 0.94  | 7.92 | 6.19E-77 | 4.13E-75 | magenta |
| ATP6V0D1  | 9114   | ATPase, H <sup>+</sup> transporting, lysosomal 38kDa, V0 subunit d1 (ATP6V0D1), mRNA.                                                                                | -0.01 | 9.37 | 3.39E-01 | 3.84E-01 | magenta |
| AURKB     | 9212   | aurora kinase B (AURKB), mRNA.                                                                                                                                       | -0.17 | 6.41 | 4.52E-22 | 2.12E-21 | magenta |
| BABAM1    | 29086  | HSPC142 protein (HSPC142), transcript variant 1, mRNA.                                                                                                               | -0.01 | 6.17 | 6.57E-01 | 6.95E-01 | magenta |
| BAD       | 572    | BCL2-antagonist of cell death (BAD), transcript variant 2, mRNA.                                                                                                     | 0.07  | 6.33 | 3.27E-05 | 5.94E-05 | magenta |
| BAG6      | 7917   | HLA-B associated transcript 3 (BAT3), transcript variant 1, mRNA.                                                                                                    | -0.12 | 8.50 | 1.43E-12 | 4.17E-12 | magenta |
| BAK1      | 578    | BCL2-antagonist/killer 1 (BAK1), mRNA.                                                                                                                               | 0.01  | 8.66 | 6.27E-01 | 6.67E-01 | magenta |
| C14orf169 | 79697  | chromosome 14 open reading frame 169 (C14orf169), mRNA.                                                                                                              | 0.11  | 7.99 | 5.37E-11 | 1.43E-10 | magenta |
| C17orf97  | 400566 | hypothetical gene supported by AK128660 (LOC400566), mRNA.                                                                                                           | -0.12 | 6.86 | 4.15E-12 | 1.17E-11 | magenta |

|          |       |                                                                                      |       |      |          |          |         |
|----------|-------|--------------------------------------------------------------------------------------|-------|------|----------|----------|---------|
| C19orf24 | 55009 | chromosome 19 open reading frame 24 (C19orf24), mRNA.                                | -0.14 | 9.19 | 1.15E-26 | 6.64E-26 | magenta |
| C19orf43 | 79002 | chromosome 19 open reading frame 43 (C19orf43), mRNA.                                | -0.14 | 7.87 | 6.04E-18 | 2.34E-17 | magenta |
| C21orf59 | 56683 | chromosome 21 open reading frame 59 (C21orf59), mRNA.                                | -0.02 | 7.58 | 5.55E-02 | 7.19E-02 | magenta |
| C2orf42  | 54980 | chromosome 2 open reading frame 42 (C2orf42), mRNA.                                  | 0.36  | 8.95 | 5.75E-47 | 8.16E-46 | magenta |
| C6orf106 | 64771 | chromosome 6 open reading frame 106 (C6orf106), transcript variant 2, mRNA.          | 0.12  | 5.69 | 6.11E-13 | 1.81E-12 | magenta |
| C9orf16  | 79095 | chromosome 9 open reading frame 16 (C9orf16), mRNA.                                  | -0.02 | 8.49 | 1.21E-01 | 1.50E-01 | magenta |
| CAMK1D   | 57118 | calcium/calmodulin-dependent protein kinase ID (CAMK1D), transcript variant 2, mRNA. | 0.05  | 8.05 | 8.36E-04 | 1.34E-03 | magenta |
| CAPNS1   | 826   | calpain, small subunit 1 (CAPNS1), transcript variant 2, mRNA.                       | -0.03 | 6.77 | 2.60E-02 | 3.51E-02 | magenta |
| CBX1     | 10951 | chromobox homolog 1 (HP1 beta homolog Drosophila ) (CBX1), mRNA.                     | 0.04  | 8.17 | 2.46E-02 | 3.34E-02 | magenta |
| CBX4     | 8535  | chromobox homolog 4 (Pc class homolog, Drosophila) (CBX4), mRNA.                     | -0.10 | 7.18 | 8.27E-08 | 1.81E-07 | magenta |

|         |        |                                                                               |       |       |          |          |         |
|---------|--------|-------------------------------------------------------------------------------|-------|-------|----------|----------|---------|
| CCDC124 | 115098 | coiled-coil domain containing 124 (CCDC124), mRNA.                            | 0.00  | 7.45  | 8.59E-01 | 8.80E-01 | magenta |
| CD27    | 939    | CD27 molecule (CD27), mRNA.                                                   | -0.11 | 10.01 | 1.27E-19 | 5.36E-19 | magenta |
| CDK2AP2 | 10263  | CDK2-associated protein 2 (CDK2AP2), mRNA.                                    | -0.15 | 6.45  | 1.11E-18 | 4.45E-18 | magenta |
| CHCHD3  | 54927  | coiled-coil-helix-coiled-coil-helix domain containing 3 (CHCHD3), mRNA.       | -0.22 | 6.80  | 2.13E-31 | 1.46E-30 | magenta |
| CINP    | 51550  | cyclin-dependent kinase 2-interacting protein (CINP), mRNA.                   | -0.06 | 6.38  | 1.02E-02 | 1.44E-02 | magenta |
| CLTA    | 1211   | clathrin, light chain (Lca) (CLTA), transcript variant 1, mRNA.               | 0.22  | 8.83  | 2.27E-16 | 8.10E-16 | magenta |
| COPE    | 11316  | coatamer protein complex, subunit epsilon (COPE), transcript variant 2, mRNA. | -0.06 | 7.34  | 2.55E-05 | 4.69E-05 | magenta |
| COPG2   | 26958  | coatamer protein complex, subunit gamma 2 (COPG2), mRNA.                      | -0.12 | 9.38  | 3.27E-08 | 7.36E-08 | magenta |
| CORO1A  | 11151  | coronin, actin binding protein, 1A (CORO1A), mRNA.                            | -0.11 | 6.42  | 3.46E-10 | 8.79E-10 | magenta |
| CPS1    | 1373   | carbamoyl-phosphate synthetase 1, mitochondrial (CPS1), mRNA.                 | 0.01  | 7.30  | 2.71E-01 | 3.13E-01 | magenta |
| CPSF3L  | 54973  | cleavage and polyadenylation specific factor 3-like (CPSF3L), mRNA.           | -0.04 | 9.41  | 6.79E-03 | 9.86E-03 | magenta |
| CSNK2B  | 1460   | casein kinase 2, beta polypeptide (CSNK2B), mRNA.                             | 0.01  | 9.68  | 4.53E-01 | 4.99E-01 | magenta |

|       |       |                                                                                                |       |      |          |          |         |
|-------|-------|------------------------------------------------------------------------------------------------|-------|------|----------|----------|---------|
| CTSH  | 1512  | cathepsin H (CTSH), transcript variant 2, mRNA.                                                | 0.06  | 8.08 | 9.64E-04 | 1.53E-03 | magenta |
| DCPS  | 28960 | decapping enzyme, scavenger (DCPS), mRNA.                                                      | 0.05  | 5.79 | 5.50E-05 | 9.78E-05 | magenta |
| DDX41 | 51428 | DEAD (Asp-Glu-Ala-Asp) box polypeptide 41 (DDX41), mRNA.                                       | 0.08  | 6.14 | 1.95E-05 | 3.62E-05 | magenta |
| DFFA  | 1676  | DNA fragmentation factor, 45kDa, alpha polypeptide (DFFA), transcript variant 1, mRNA.         | 0.23  | 7.56 | 7.55E-38 | 7.01E-37 | magenta |
| DHPS  | 1725  | deoxyhypusine synthase (DHPS), transcript variant 3, mRNA.                                     | -0.05 | 7.61 | 1.15E-03 | 1.80E-03 | magenta |
| DLST  | 1743  | dihydrolipoamide S-succinyltransferase (E2 component of 2-oxo-glutarate complex) (DLST), mRNA. | 0.03  | 6.62 | 3.71E-02 | 4.92E-02 | magenta |
| DSCC1 | 79075 | defective in sister chromatid cohesion homolog 1 (S. cerevisiae) (DCC1), mRNA.                 | -0.04 | 6.37 | 5.90E-02 | 7.61E-02 | magenta |
| DTD1  | 92675 | D-tyrosyl-tRNA deacylase 1 homolog (S. cerevisiae) (DTD1), mRNA.                               | 0.03  | 6.31 | 4.55E-02 | 5.97E-02 | magenta |
| DUSP3 | 1845  | dual specificity phosphatase 3 (vaccinia virus phosphatase VH1-related) (DUSP3), mRNA.         | -0.01 | 9.91 | 3.75E-01 | 4.20E-01 | magenta |

|          |        |                                                                                                                             |       |       |          |          |         |
|----------|--------|-----------------------------------------------------------------------------------------------------------------------------|-------|-------|----------|----------|---------|
| EEF1D    | 1936   | eukaryotic translation elongation factor 1 delta (guanine nucleotide exchange protein) (EEF1D), transcript variant 2, mRNA. | -0.01 | 10.78 | 1.19E-01 | 1.47E-01 | magenta |
| EIF3G    | 8666   | eukaryotic translation initiation factor 3, subunit 4 delta, 44kDa (EIF3S4), mRNA.                                          | 0.17  | 6.53  | 2.12E-19 | 8.79E-19 | magenta |
| EIF3H    | 8667   | eukaryotic translation initiation factor 3, subunit 3 gamma, 40kDa (EIF3S3), mRNA.                                          | 0.16  | 6.24  | 1.73E-22 | 8.26E-22 | magenta |
| EIF4EBP1 | 1978   | eukaryotic translation initiation factor 4E binding protein 1 (EIF4EBP1), mRNA.                                             | 0.04  | 8.59  | 1.41E-02 | 1.97E-02 | magenta |
| EIF6     | 3692   | integrin beta 4 binding protein (ITGB4BP), transcript variant 4, mRNA.                                                      | -0.02 | 5.51  | 1.75E-01 | 2.10E-01 | magenta |
| ELOF1    | 84337  | elongation factor 1 homolog ( <i>S. cerevisiae</i> ) (ELOF1), mRNA.                                                         | 0.09  | 6.60  | 5.19E-08 | 1.15E-07 | magenta |
| EXOSC4   | 54512  | exosome component 4 (EXOSC4), mRNA.                                                                                         | -0.04 | 8.12  | 1.62E-04 | 2.77E-04 | magenta |
| FAHD2B   | 731002 | PREDICTED: similar to fumarylacetoacetate hydrolase domain containing 2A (LOC731002), mRNA.                                 | -0.01 | 7.70  | 6.45E-01 | 6.83E-01 | magenta |
| FAM104A  | 84923  | family with sequence similarity 104, member A (FAM104A), mRNA.                                                              | 0.01  | 5.54  | 6.67E-01 | 7.04E-01 | magenta |

|         |        |                                                                                                 |       |       |          |          |         |
|---------|--------|-------------------------------------------------------------------------------------------------|-------|-------|----------|----------|---------|
| FAM175B | 23172  | KIAA0157 (KIAA0157), mRNA.                                                                      | -0.04 | 5.65  | 6.89E-03 | 9.99E-03 | magenta |
| FAM195B | 348262 | hypothetical protein LOC348262 (LOC348262), mRNA.                                               | -0.06 | 8.66  | 5.88E-06 | 1.14E-05 | magenta |
| FARSA   | 2193   | phenylalanyl-tRNA synthetase, alpha subunit (FARSA), mRNA.                                      | -0.03 | 5.44  | 7.43E-02 | 9.47E-02 | magenta |
| FASTK   | 10922  | Fas-activated serine/threonine kinase (FASTK), transcript variant 1, mRNA.                      | -0.22 | 7.03  | 1.55E-42 | 1.78E-41 | magenta |
| FKBP8   | 23770  | FK506 binding protein 8, 38kDa (FKBP8), mRNA.                                                   | 0.07  | 8.38  | 6.20E-06 | 1.20E-05 | magenta |
| FLOT1   | 10211  | flotillin 1 (FLOT1), mRNA.                                                                      | -0.46 | 10.23 | 2.12E-47 | 3.07E-46 | magenta |
| GAPDH   | 2597   | glyceraldehyde-3-phosphate dehydrogenase (GAPDH), mRNA.                                         | -0.01 | 5.61  | 5.16E-01 | 5.60E-01 | magenta |
| GNAS    | 2778   | GNAS complex locus (GNAS), transcript variant 1, mRNA.                                          | 0.03  | 7.57  | 2.00E-02 | 2.74E-02 | magenta |
| GNB2    | 2783   | guanine nucleotide binding protein (G protein), beta polypeptide 2 (GNB2), mRNA.                | 0.46  | 6.20  | 6.83E-54 | 1.28E-52 | magenta |
| GRK6    | 2870   | G protein-coupled receptor kinase 6 (GRK6), transcript variant 2, mRNA.                         | -0.14 | 6.81  | 1.16E-23 | 5.90E-23 | magenta |
| GSPT1   | 2935   | G1 to S phase transition 1 (GSPT1), mRNA.                                                       | 0.05  | 10.41 | 5.86E-04 | 9.52E-04 | magenta |
| HADH    | 3033   | hydroxyacyl-Coenzyme A dehydrogenase (HADH), nuclear gene encoding mitochondrial protein, mRNA. | -0.09 | 6.84  | 1.21E-08 | 2.81E-08 | magenta |



|          |        |                                                                                                                           |       |       |          |          |         |
|----------|--------|---------------------------------------------------------------------------------------------------------------------------|-------|-------|----------|----------|---------|
| HDGF     | 3068   | hepatoma-derived growth factor (high-mobility group protein 1-like) (HDGF), mRNA.                                         | -0.05 | 8.25  | 1.10E-02 | 1.56E-02 | magenta |
| HDHD3    | 81932  | haloacid dehalogenase-like hydrolase domain containing 3 (HDHD3), mRNA.                                                   | 0.11  | 6.41  | 2.89E-07 | 6.11E-07 | magenta |
| HLA-A    | 3105   | major histocompatibility complex, class I, A (HLA-A), mRNA.                                                               | 0.26  | 7.59  | 5.41E-34 | 4.12E-33 | magenta |
| HLA-E    | 3133   | major histocompatibility complex, class I, E (HLA-E), mRNA.                                                               | 0.05  | 8.94  | 1.02E-02 | 1.44E-02 | magenta |
| IDH2     | 3418   | isocitrate dehydrogenase 2 (NADP+), mitochondrial (IDH2), mRNA.                                                           | -0.05 | 8.85  | 9.04E-04 | 1.44E-03 | magenta |
| IDH3G    | 3421   | isocitrate dehydrogenase 3 (NAD+) gamma (IDH3G), nuclear gene encoding mitochondrial protein, transcript variant 1, mRNA. | 0.01  | 6.35  | 5.32E-01 | 5.77E-01 | magenta |
| IFRD2    | 7866   | interferon-related developmental regulator 2 (IFRD2), mRNA.                                                               | -0.28 | 7.05  | 5.05E-40 | 5.06E-39 | magenta |
| ILDR1    | 286676 | immunoglobulin-like domain containing receptor 1 (ILDR1), mRNA.                                                           | -0.14 | 8.35  | 3.45E-21 | 1.55E-20 | magenta |
| KARS     | 3735   | lysyl-tRNA synthetase (KARS), mRNA.                                                                                       | -0.02 | 10.76 | 6.81E-02 | 8.74E-02 | magenta |
| KIAA1191 | 57179  | KIAA1191 (KIAA1191), transcript variant 3, mRNA.                                                                          | -0.05 | 5.58  | 5.20E-04 | 8.49E-04 | magenta |

|        |       |                                                                                                   |       |       |          |          |         |
|--------|-------|---------------------------------------------------------------------------------------------------|-------|-------|----------|----------|---------|
| KIF22  | 3835  | kinesin family member 22 (KIF22), mRNA.                                                           | 0.00  | 12.07 | 9.39E-01 | 9.48E-01 | magenta |
| KLHL3  | 26249 | kelch-like 3 (Drosophila) (KLHL3), mRNA.                                                          | 0.05  | 9.05  | 2.54E-02 | 3.44E-02 | magenta |
| KRCC1  | 51315 | lysine-rich coiled-coil 1 (KRCC1), mRNA.                                                          | -0.04 | 8.87  | 1.91E-04 | 3.25E-04 | magenta |
| LPAR5  | 57121 | G protein-coupled receptor 92 (GPR92), mRNA.                                                      | 0.00  | 9.15  | 9.76E-01 | 9.80E-01 | magenta |
| LYST   | 1130  | lysosomal trafficking regulator (LYST), transcript variant 1, mRNA.                               | 0.01  | 7.00  | 4.42E-01 | 4.88E-01 | magenta |
| MAF1   | 84232 | MAF1 homolog (S. cerevisiae) (MAF1), mRNA.                                                        | 0.07  | 8.66  | 4.28E-10 | 1.08E-09 | magenta |
| MAN2B1 | 4125  | mannosidase, alpha, class 2B, member 1 (MAN2B1), mRNA.                                            | -0.05 | 7.38  | 3.57E-03 | 5.33E-03 | magenta |
| MAP2K2 | 5605  | mitogen-activated protein kinase kinase 2 (MAP2K2), mRNA.                                         | -0.05 | 7.29  | 9.57E-04 | 1.52E-03 | magenta |
| MBD3   | 53615 | methyl-CpG binding domain protein 3 (MBD3), mRNA.                                                 | 0.14  | 9.40  | 3.98E-15 | 1.32E-14 | magenta |
| MCM5   | 4174  | MCM5 minichromosome maintenance deficient 5, cell division cycle 46 (S. cerevisiae) (MCM5), mRNA. | 0.00  | 7.50  | 9.67E-01 | 9.72E-01 | magenta |
| MIPEP  | 4285  | mitochondrial intermediate peptidase (MIPEP), nuclear gene encoding mitochondrial protein, mRNA.  | -0.16 | 7.51  | 3.61E-36 | 3.06E-35 | magenta |
| MKRN1  | 23608 | makorin, ring finger protein, 1 (MKRN1), mRNA.                                                    | -0.21 | 6.66  | 4.83E-33 | 3.55E-32 | magenta |

|         |       |                                                                                                                |       |      |          |          |         |
|---------|-------|----------------------------------------------------------------------------------------------------------------|-------|------|----------|----------|---------|
| MPV17   | 4358  | MpV17 mitochondrial inner membrane protein (MPV17), nuclear gene encoding mitochondrial protein, mRNA.         | 0.14  | 8.45 | 1.83E-18 | 7.26E-18 | magenta |
| MRPL12  | 6182  | mitochondrial ribosomal protein L12 (MRPL12), nuclear gene encoding mitochondrial protein, mRNA.               | -0.10 | 9.99 | 7.40E-15 | 2.43E-14 | magenta |
| MRPL28  | 10573 | mitochondrial ribosomal protein L28 (MRPL28), nuclear gene encoding mitochondrial protein, mRNA.               | -0.11 | 6.59 | 1.66E-16 | 5.97E-16 | magenta |
| MRPS18B | 28973 | mitochondrial ribosomal protein S18B (MRPS18B), nuclear gene encoding mitochondrial protein, mRNA.             | 0.13  | 8.80 | 2.33E-08 | 5.28E-08 | magenta |
| MRT04   | 51154 | mRNA turnover 4 homolog (S. cerevisiae) (MRT04), mRNA.                                                         | -0.14 | 7.43 | 4.15E-19 | 1.70E-18 | magenta |
| MSH3    | 4437  | mutS homolog 3 (E. coli) (MSH3), mRNA.                                                                         | -0.09 | 8.68 | 9.48E-09 | 2.21E-08 | magenta |
| MTFP1   | 51537 | mitochondrial protein 18 kDa (MTP18), nuclear gene encoding mitochondrial protein, transcript variant 1, mRNA. | -0.30 | 6.98 | 1.47E-56 | 3.20E-55 | magenta |
| MVD     | 4597  | mevalonate (diphospho) decarboxylase (MVD), mRNA.                                                              | -0.49 | 6.91 | 1.83E-57 | 4.27E-56 | magenta |

|         |        |                                                                                                                  |       |      |          |          |         |
|---------|--------|------------------------------------------------------------------------------------------------------------------|-------|------|----------|----------|---------|
| MVP     | 9961   | major vault protein (MVP), transcript variant 2, mRNA.                                                           | 0.01  | 7.29 | 5.47E-01 | 5.91E-01 | magenta |
| MYLIP   | 29116  | myosin regulatory light chain interacting protein (MYLIP), mRNA.                                                 | -0.88 | 8.73 | 2.53E-61 | 7.56E-60 | magenta |
| NA      | 283820 | NODAL modulator 2 (NOMO2), transcript variant 2, mRNA.                                                           | 0.74  | 8.46 | 1.04E-83 | 1.22E-81 | magenta |
| NA      | 51491  | hypothetical protein HSPC111 (HSPC111), mRNA.                                                                    | 0.13  | 7.10 | 5.50E-13 | 1.64E-12 | magenta |
| NA      | 440400 | similar to DNA segment, Chr 11, Brigham & Womens Genetics 0434 expressed (MGC71993), mRNA.                       | 0.08  | 7.64 | 1.03E-09 | 2.53E-09 | magenta |
| NA      | 1415   | crystallin, beta B2 (CRYBB2), mRNA.                                                                              | -0.05 | 6.64 | 4.63E-03 | 6.84E-03 | magenta |
| NA      | 731986 | PREDICTED: similar to cytochrome P450 monooxygenase CYP2T1 (LOC731986), mRNA.                                    | 0.04  | 7.26 | 1.78E-02 | 2.46E-02 | magenta |
| NA      | 84833  | upregulated during skeletal muscle growth 5 homolog (mouse) (USMG5), mRNA.                                       | 0.03  | 5.44 | 3.77E-02 | 4.99E-02 | magenta |
| NDUFA10 | 732160 | PREDICTED: similar to NADH dehydrogenase (ubiquinone) 1 alpha subcomplex, 10, 42kDa precursor (LOC732160), mRNA. | 0.04  | 8.94 | 2.81E-03 | 4.23E-03 | magenta |

|           |        |                                                                                                                 |       |       |          |          |         |
|-----------|--------|-----------------------------------------------------------------------------------------------------------------|-------|-------|----------|----------|---------|
| NFATC3    | 4775   | nuclear factor of activated T-cells, cytoplasmic, calcineurin-dependent 3 (NFATC3), transcript variant 2, mRNA. | 0.01  | 6.83  | 4.73E-01 | 5.18E-01 | magenta |
| NME1-NME2 | 654364 | NM23-LV (NME1-NME2), mRNA.                                                                                      | 0.14  | 6.74  | 4.55E-17 | 1.69E-16 | magenta |
| NOB1      | 28987  | NIN1/RPN12 binding protein 1 homolog (S. cerevisiae) (NOB1), mRNA.                                              | -0.20 | 8.30  | 1.51E-19 | 6.31E-19 | magenta |
| NONO      | 4841   | non-POU domain containing, octamer-binding (NONO), mRNA.                                                        | -0.06 | 7.75  | 5.98E-05 | 1.06E-04 | magenta |
| NUBP1     | 4682   | nucleotide binding protein 1 (MinD homolog, E. coli) (NUBP1), mRNA.                                             | -0.13 | 10.26 | 1.75E-19 | 7.29E-19 | magenta |
| NUDC      | 10726  | nuclear distribution gene C homolog (A. nidulans) (NUDC), mRNA.                                                 | -0.03 | 7.52  | 4.46E-02 | 5.86E-02 | magenta |
| NUDT22    | 84304  | nudix (nucleoside diphosphate linked moiety X)-type motif 22 (NUDT22), mRNA.                                    | 0.06  | 8.34  | 1.15E-04 | 1.98E-04 | magenta |
| OTP       | 23440  | orthopedia homeobox (OTP), mRNA.                                                                                | -0.39 | 8.95  | 1.81E-53 | 3.24E-52 | magenta |
| OXA1L     | 5018   | oxidase (cytochrome c) assembly 1-like (OXA1L), mRNA.                                                           | -0.08 | 7.29  | 3.01E-06 | 5.94E-06 | magenta |
| PAGR1     | 79447  | chromosome 16 open reading frame 53 (C16orf53), mRNA.                                                           | 0.07  | 7.67  | 4.91E-07 | 1.02E-06 | magenta |
| PAK1      | 5058   | p21/Cdc42/Rac1-activated kinase 1 (STE20 homolog, yeast) (PAK1), mRNA.                                          | -0.04 | 9.12  | 1.43E-02 | 2.00E-02 | magenta |

|         |        |                                                                                               |       |       |          |          |         |
|---------|--------|-----------------------------------------------------------------------------------------------|-------|-------|----------|----------|---------|
| PCGF2   | 7703   | polycomb group ring finger 2 (PCGF2), mRNA.                                                   | 0.05  | 7.81  | 3.29E-04 | 5.47E-04 | magenta |
| PGLS    | 25796  | 6-phosphogluconolactonase (PGLS), mRNA.                                                       | 0.01  | 6.99  | 3.67E-01 | 4.12E-01 | magenta |
| PHACTR4 | 65979  | phosphatase and actin regulator 4 (PHACTR4), transcript variant 1, mRNA.                      | 0.07  | 6.70  | 1.40E-05 | 2.63E-05 | magenta |
| PLP2    | 5355   | proteolipid protein 2 (colonic epithelium-enriched) (PLP2), mRNA.                             | 0.07  | 10.20 | 3.52E-05 | 6.38E-05 | magenta |
| PMVK    | 10654  | phosphomevalonate kinase (PMVK), mRNA.                                                        | -0.11 | 6.26  | 1.25E-09 | 3.06E-09 | magenta |
| POLD4   | 57804  | polymerase (DNA-directed), delta 4 (POLD4), mRNA.                                             | -0.01 | 6.65  | 5.69E-01 | 6.13E-01 | magenta |
| PPIH    | 10465  | peptidylprolyl isomerase H (cyclophilin H) (PPIH), mRNA.                                      | 0.01  | 5.63  | 5.07E-01 | 5.52E-01 | magenta |
| PPP2R5A | 5525   | protein phosphatase 2, regulatory subunit B', alpha isoform (PPP2R5A), mRNA.                  | 0.06  | 10.31 | 3.53E-05 | 6.40E-05 | magenta |
| PQLC3   | 130814 | PQ loop repeat containing 3 (PQLC3), mRNA.                                                    | 0.00  | 9.30  | 9.29E-01 | 9.40E-01 | magenta |
| PRCC    | 5546   | papillary renal cell carcinoma (translocation-associated) (PRCC), transcript variant 1, mRNA. | 0.00  | 6.20  | 7.73E-01 | 8.02E-01 | magenta |
| PRKCSH  | 5589   | protein kinase C substrate 80K-H (PRKCSH), transcript variant 1, mRNA.                        | 0.04  | 7.42  | 6.93E-02 | 8.87E-02 | magenta |

|         |        |                                                                                                                              |       |       |          |          |         |
|---------|--------|------------------------------------------------------------------------------------------------------------------------------|-------|-------|----------|----------|---------|
| PSENEN  | 55851  | presenilin enhancer 2 homolog (C. elegans) (PSENEN), mRNA.                                                                   | -0.21 | 10.32 | 2.01E-35 | 1.64E-34 | magenta |
| PSMD3   | 5709   | proteasome (prosome, macropain) 26S subunit, non-ATPase, 3 (PSMD3), mRNA.                                                    | -0.01 | 9.84  | 3.57E-01 | 4.03E-01 | magenta |
| PSMD4   | 5710   | proteasome (prosome, macropain) 26S subunit, non-ATPase, 4 (PSMD4), transcript variant 2, mRNA.                              | -0.06 | 10.86 | 7.38E-07 | 1.51E-06 | magenta |
| PTGES2  | 80142  | prostaglandin E synthase 2 (PTGES2), transcript variant 1, mRNA.                                                             | 0.03  | 10.01 | 8.70E-03 | 1.25E-02 | magenta |
| PTPRCAP | 5790   | protein tyrosine phosphatase, receptor type, C-associated protein (PTPRCAP), mRNA.                                           | 0.40  | 8.13  | 5.85E-32 | 4.13E-31 | magenta |
| PUSL1   | 126789 | pseudouridylate synthase-like 1 (PUSL1), mRNA.                                                                               | 0.02  | 10.46 | 9.37E-02 | 1.18E-01 | magenta |
| QDPR    | 5860   | quinoid dihydropteridine reductase (QDPR), mRNA.                                                                             | 0.25  | 7.02  | 6.57E-32 | 4.63E-31 | magenta |
| RAB5B   | 5869   | RAB5B, member RAS oncogene family (RAB5B), mRNA.                                                                             | -0.05 | 5.85  | 1.02E-03 | 1.62E-03 | magenta |
| RALY    | 22913  | RNA binding protein, autoantigenic (hnRNP-associated with lethal yellow homolog (mouse)) (RALY), transcript variant 1, mRNA. | -0.13 | 7.38  | 1.07E-18 | 4.30E-18 | magenta |

|        |        |                                                                                     |       |       |          |          |         |
|--------|--------|-------------------------------------------------------------------------------------|-------|-------|----------|----------|---------|
| RANGRF | 29098  | RAN guanine nucleotide release factor (RANGNRF), mRNA.                              | -0.07 | 5.93  | 1.93E-04 | 3.28E-04 | magenta |
| RBM17  | 84991  | RNA binding motif protein 17 (RBM17), mRNA.                                         | 0.02  | 5.90  | 1.08E-01 | 1.35E-01 | magenta |
| RHBDD2 | 57414  | rhomboid domain containing 2 (RHBDD2), transcript variant 2, mRNA.                  | -0.01 | 11.81 | 7.52E-01 | 7.82E-01 | magenta |
| RHOF   | 54509  | ras homolog gene family, member F (in filopodia) (RHOF), mRNA.                      | 0.60  | 9.97  | 4.46E-79 | 3.84E-77 | magenta |
| RNF126 | 55658  | ring finger protein 126 (RNF126), transcript variant 2, mRNA.                       | 0.23  | 8.63  | 1.40E-35 | 1.15E-34 | magenta |
| RNH1   | 6050   | ribonuclease/angiogenin inhibitor 1 (RNH1), transcript variant 8, mRNA.             | 0.37  | 7.63  | 3.64E-48 | 5.47E-47 | magenta |
| RNPS1  | 10921  | RNA binding protein S1, serine-rich domain (RNPS1), transcript variant 1, mRNA.     | -0.19 | 5.79  | 6.92E-18 | 2.67E-17 | magenta |
| RPL4   | 6124   | ribosomal protein L4 (RPL4), mRNA.                                                  | 0.05  | 9.18  | 9.46E-04 | 1.50E-03 | magenta |
| RPL6   | 6128   | ribosomal protein L6 (RPL6), transcript variant 2, mRNA.                            | 0.14  | 8.24  | 8.86E-19 | 3.56E-18 | magenta |
| RPS2   | 440589 | PREDICTED: similar to ribosomal protein S2, transcript variant 3 (LOC440589), mRNA. | 0.05  | 7.76  | 1.80E-05 | 3.37E-05 | magenta |
| RPS29  | 6235   | ribosomal protein S29 (RPS29), transcript variant 1, mRNA.                          | -0.12 | 7.52  | 1.39E-16 | 5.04E-16 | magenta |



|          |        |                                                                                     |       |      |          |          |         |
|----------|--------|-------------------------------------------------------------------------------------|-------|------|----------|----------|---------|
| RSL1D1   | 26156  | ribosomal L1 domain containing 1 (RSL1D1), mRNA.                                    | -0.09 | 7.07 | 6.43E-08 | 1.42E-07 | magenta |
| RUVBL1   | 8607   | RuvB-like 1 (E. coli) (RUVBL1), mRNA.                                               | -0.43 | 6.69 | 1.90E-59 | 5.16E-58 | magenta |
| RUVBL2   | 10856  | RuvB-like 2 (E. coli) (RUVBL2), mRNA.                                               | 0.10  | 6.60 | 1.40E-11 | 3.84E-11 | magenta |
| RWDD4    | 201965 | RWD domain containing 4A (RWDD4A), mRNA.                                            | 0.08  | 8.77 | 1.09E-11 | 3.02E-11 | magenta |
| SAAL1    | 113174 | serum amyloid A-like 1 (SAAL1), mRNA.                                               | 0.36  | 9.88 | 1.67E-54 | 3.24E-53 | magenta |
| SAMM50   | 25813  | sorting and assembly machinery component 50 homolog (S. cerevisiae) (SAMM50), mRNA. | 0.31  | 8.03 | 3.34E-32 | 2.40E-31 | magenta |
| SCRN1    | 9805   | secernin 1 (SCRN1), mRNA.                                                           | -0.06 | 7.93 | 2.05E-03 | 3.15E-03 | magenta |
| SEC13    | 6396   | SEC13 homolog (S. cerevisiae) (SEC13), mRNA.                                        | 0.08  | 8.65 | 1.23E-12 | 3.59E-12 | magenta |
| SEC61A1  | 29927  | Sec61 alpha 1 subunit (S. cerevisiae) (SEC61A1), mRNA.                              | -0.16 | 8.04 | 9.99E-16 | 3.45E-15 | magenta |
| SH3BGRL3 | 83442  | SH3 domain binding glutamic acid-rich protein like 3 (SH3BGRL3), mRNA.              | -0.09 | 6.78 | 1.86E-05 | 3.46E-05 | magenta |
| SIAH1    | 6477   | seven in absentia homolog 1 (Drosophila) (SIAH1), transcript variant 2, mRNA.       | -0.10 | 8.18 | 6.61E-11 | 1.75E-10 | magenta |
| SIAH2    | 6478   | seven in absentia homolog 2 (Drosophila) (SIAH2), mRNA.                             | 0.01  | 8.93 | 4.85E-01 | 5.30E-01 | magenta |

|          |        |                                                                                                  |       |       |          |          |         |
|----------|--------|--------------------------------------------------------------------------------------------------|-------|-------|----------|----------|---------|
| SLC25A1  | 6576   | solute carrier family 25 (mitochondrial carrier; citrate transporter), member 1 (SLC25A1), mRNA. | 0.00  | 8.16  | 9.11E-01 | 9.25E-01 | magenta |
| SLC25A23 | 79085  | solute carrier family 25 (mitochondrial carrier; phosphate carrier), member 23 (SLC25A23), mRNA. | 0.19  | 7.29  | 1.04E-24 | 5.60E-24 | magenta |
| SLC35A4  | 113829 | solute carrier family 35, member A4 (SLC35A4), mRNA.                                             | -0.06 | 7.72  | 1.50E-08 | 3.46E-08 | magenta |
| SNAP29   | 9342   | synaptosomal-associated protein, 29kDa (SNAP29), mRNA.                                           | -0.29 | 8.45  | 8.43E-52 | 1.42E-50 | magenta |
| SNRNP25  | 79622  | chromosome 16 open reading frame 33 (C16orf33), mRNA.                                            | 0.01  | 11.43 | 4.75E-01 | 5.20E-01 | magenta |
| SNRPC    | 6631   | small nuclear ribonucleoprotein polypeptide C (SNRPC), mRNA.                                     | -0.08 | 7.91  | 8.36E-05 | 1.47E-04 | magenta |
| SNX19    | 399979 | sorting nexin 19 (SNX19), mRNA.                                                                  | 0.39  | 7.74  | 4.03E-55 | 8.11E-54 | magenta |
| SRM      | 6723   | spermidine synthase (SRM), mRNA.                                                                 | -0.39 | 7.69  | 1.13E-47 | 1.66E-46 | magenta |
| STUB1    | 10273  | STIP1 homology and U-box containing protein 1 (STUB1), mRNA.                                     | -0.05 | 8.29  | 1.94E-03 | 2.98E-03 | magenta |
| SUMO3    | 6612   | SMT3 suppressor of mif two 3 homolog 3 ( <i>S. cerevisiae</i> ) (SUMO3), mRNA.                   | 0.07  | 10.50 | 2.01E-07 | 4.30E-07 | magenta |

|           |        |                                                                                                 |       |      |          |          |         |
|-----------|--------|-------------------------------------------------------------------------------------------------|-------|------|----------|----------|---------|
| TAF10     | 6881   | TAF10 RNA polymerase II, TATA box binding protein (TBP)-associated factor, 30kDa (TAF10), mRNA. | 0.07  | 8.01 | 2.11E-08 | 4.79E-08 | magenta |
| TALDO1    | 6888   | transaldolase 1 (TALDO1), mRNA.                                                                 | 0.06  | 9.05 | 2.55E-04 | 4.28E-04 | magenta |
| TCHP      | 84260  | trichoplein, keratin filament binding (TCHP), mRNA.                                             | 0.16  | 8.46 | 8.22E-16 | 2.85E-15 | magenta |
| TERF2IP   | 54386  | telomeric repeat binding factor 2, interacting protein (TERF2IP), mRNA.                         | -0.31 | 8.54 | 2.75E-56 | 5.96E-55 | magenta |
| TFEB      | 7942   | transcription factor EB (TFEB), mRNA.                                                           | 0.08  | 8.18 | 5.15E-06 | 9.98E-06 | magenta |
| THOC6     | 79228  | THO complex 6 homolog (Drosophila) (THOC6), mRNA.                                               | 0.14  | 7.38 | 6.99E-25 | 3.78E-24 | magenta |
| TMEM165   | 55858  | transmembrane protein 165 (TMEM165), mRNA.                                                      | -0.03 | 8.56 | 4.21E-02 | 5.54E-02 | magenta |
| TMEM9     | 252839 | transmembrane protein 9 (TMEM9), mRNA.                                                          | 0.19  | 8.65 | 6.21E-21 | 2.76E-20 | magenta |
| TNFRSF13B | 23495  | tumor necrosis factor receptor superfamily, member 13B (TNFRSF13B), mRNA.                       | -0.03 | 8.49 | 3.37E-03 | 5.04E-03 | magenta |
| TNRC6B    | 23112  | trinucleotide repeat containing 6B (TNRC6B), transcript variant 2, mRNA.                        | -0.10 | 7.51 | 3.60E-07 | 7.55E-07 | magenta |
| TOPBP1    | 11073  | topoisomerase (DNA) II binding protein 1 (TOPBP1), mRNA.                                        | 0.16  | 8.17 | 1.17E-21 | 5.39E-21 | magenta |
| TOR3A     | 64222  | torsin family 3, member A (TOR3A), mRNA.                                                        | 0.03  | 9.63 | 1.67E-02 | 2.30E-02 | magenta |

|         |        |                                                                              |       |       |          |          |         |
|---------|--------|------------------------------------------------------------------------------|-------|-------|----------|----------|---------|
| TRAP1   | 10131  | TNF receptor-associated protein 1 (TRAP1), mRNA.                             | -0.11 | 9.76  | 9.66E-15 | 3.16E-14 | magenta |
| TSTA3   | 7264   | tissue specific transplantation antigen P35B (TSTA3), mRNA.                  | 0.08  | 10.86 | 1.84E-15 | 6.22E-15 | magenta |
| TUBB4B  | 10383  | tubulin, beta 2C (TUBB2C), mRNA.                                             | -0.03 | 9.76  | 9.72E-02 | 1.22E-01 | magenta |
| TUBB8   | 56604  | tubulin, beta polypeptide 4, member Q (TUBB4Q), mRNA.                        | 0.05  | 6.23  | 5.77E-04 | 9.38E-04 | magenta |
| TUBB8   | 347688 | tubulin, beta 8 (TUBB8), mRNA.                                               | 0.02  | 7.34  | 1.62E-01 | 1.95E-01 | magenta |
| TUBGCP2 | 10844  | tubulin, gamma complex associated protein 2 (TUBGCP2), mRNA.                 | -0.02 | 9.84  | 4.79E-02 | 6.26E-02 | magenta |
| TUFM    | 7284   | Tu translation elongation factor, mitochondrial (TUFM), mRNA.                | 0.07  | 7.32  | 2.93E-05 | 5.36E-05 | magenta |
| TWF2    | 11344  | twinfilin, actin-binding protein, homolog 2 (Drosophila) (TWF2), mRNA.       | -0.11 | 6.33  | 2.25E-13 | 6.84E-13 | magenta |
| TXNDC12 | 51060  | thioredoxin domain containing 12 (endoplasmic reticulum) (TXNDC12), mRNA.    | 0.02  | 8.91  | 1.30E-01 | 1.59E-01 | magenta |
| U2AF1   | 7307   | U2 small nuclear RNA auxiliary factor 1 (U2AF1), transcript variant a, mRNA. | 0.05  | 10.32 | 2.97E-02 | 3.97E-02 | magenta |
| UBE2N   | 7334   | ubiquitin-conjugating enzyme E2N (UBC13 homolog, yeast) (UBE2N), mRNA.       | -0.01 | 8.25  | 2.83E-01 | 3.25E-01 | magenta |
| UCK2    | 7371   | uridine-cytidine kinase 2 (UCK2), mRNA.                                      | 0.03  | 7.62  | 1.76E-02 | 2.42E-02 | magenta |

|        |       |                                                                                                   |       |       |          |          |         |
|--------|-------|---------------------------------------------------------------------------------------------------|-------|-------|----------|----------|---------|
| UNC45A | 55898 | unc-45 homolog A ( <i>C. elegans</i> ) (UNC45A), transcript variant 2, mRNA.                      | 0.10  | 6.87  | 2.81E-07 | 5.95E-07 | magenta |
| UQCRC1 | 7384  | ubiquinol-cytochrome c reductase core protein I (UQCRC1), mRNA.                                   | -0.29 | 8.19  | 8.14E-34 | 6.17E-33 | magenta |
| USP48  | 84196 | ubiquitin specific peptidase 48 (USP48), transcript variant 2, mRNA.                              | 0.05  | 9.32  | 3.17E-05 | 5.78E-05 | magenta |
| USP7   | 7874  | ubiquitin specific peptidase 7 (herpes virus-associated) (USP7), mRNA.                            | 0.06  | 10.18 | 1.26E-06 | 2.54E-06 | magenta |
| VAC14  | 55697 | Vac14 homolog ( <i>S. cerevisiae</i> ) (VAC14), mRNA.                                             | 0.02  | 6.96  | 4.26E-01 | 4.72E-01 | magenta |
| VPS28  | 51160 | vacuolar protein sorting 28 homolog ( <i>S. cerevisiae</i> ) (VPS28), transcript variant 2, mRNA. | 0.03  | 7.94  | 2.30E-01 | 2.70E-01 | magenta |
| VPS37C | 55048 | vacuolar protein sorting 37 homolog C ( <i>S. cerevisiae</i> ) (VPS37C), mRNA.                    | 0.03  | 11.48 | 2.08E-01 | 2.47E-01 | magenta |
| WIBG   | 84305 | within bgcn homolog ( <i>Drosophila</i> ) (WIBG), mRNA.                                           | 0.06  | 7.12  | 8.06E-04 | 1.29E-03 | magenta |
| WRNIP1 | 56897 | Werner helicase interacting protein 1 (WRNIP1), transcript variant 2, mRNA.                       | -0.03 | 8.41  | 8.70E-03 | 1.25E-02 | magenta |
| WWP1   | 11059 | WW domain containing E3 ubiquitin protein ligase 1 (WWP1), mRNA.                                  | -0.15 | 6.01  | 9.65E-18 | 3.70E-17 | magenta |

|          |       |                                                                                                      |       |      |          |          |              |
|----------|-------|------------------------------------------------------------------------------------------------------|-------|------|----------|----------|--------------|
| YIF1B    | 90522 | Yip1 interacting factor homolog B ( <i>S. cerevisiae</i> ) (YIF1B), transcript variant 3, mRNA.      | -0.35 | 7.71 | 3.10E-56 | 6.67E-55 | magenta      |
| ZDHHC12  | 84885 | zinc finger, DHHC-type containing 12 (ZDHHC12), mRNA.                                                | 0.13  | 7.24 | 2.63E-13 | 7.96E-13 | magenta      |
| ZFYVE26  | 23503 | zinc finger, FYVE domain containing 26 (ZFYVE26), mRNA.                                              | -0.01 | 8.63 | 3.91E-01 | 4.36E-01 | magenta      |
| ADAM15   | 8751  | ADAM metallopeptidase domain 15 (metargidin) (ADAM15), transcript variant 1, mRNA.                   | -0.05 | 9.41 | 2.19E-03 | 3.34E-03 | midnightblue |
| ADCK2    | 90956 | aarF domain containing kinase 2 (ADCK2), mRNA.                                                       | 0.30  | 7.63 | 2.55E-44 | 3.15E-43 | midnightblue |
| ADIPOR1  | 51094 | adiponectin receptor 1 (ADIPOR1), mRNA.                                                              | -0.20 | 5.68 | 5.64E-20 | 2.41E-19 | midnightblue |
| AKR7A2   | 8574  | aldo-keto reductase family 7, member A2 (aflatoxin aldehyde reductase) (AKR7A2), mRNA.               | 0.18  | 8.13 | 2.71E-27 | 1.61E-26 | midnightblue |
| APBB1IP  | 54518 | amyloid beta (A4) precursor protein-binding, family B, member 1 interacting protein (APBB1IP), mRNA. | 0.01  | 6.35 | 5.05E-01 | 5.50E-01 | midnightblue |
| ARHGEF18 | 23370 | rho/rac guanine nucleotide exchange factor (GEF) 18 (ARHGEF18), mRNA.                                | 0.38  | 7.81 | 5.67E-43 | 6.59E-42 | midnightblue |

|          |        |                                                                               |       |       |          |          |              |
|----------|--------|-------------------------------------------------------------------------------|-------|-------|----------|----------|--------------|
| ATP6V0E2 | 155066 | ATPase, H <sup>+</sup> transporting V0 subunit e2 (ATP6V0E2), mRNA.           | 0.03  | 7.34  | 1.40E-01 | 1.71E-01 | midnightblue |
| B4GAT1   | 11041  | UDP-GlcNAc:betaGal beta-1,3-N-acetylglucosaminyltransferase 1 (B3GNT1), mRNA. | -0.02 | 8.66  | 1.24E-01 | 1.53E-01 | midnightblue |
| BCKDK    | 10295  | branched chain ketoacid dehydrogenase kinase (BCKDK), mRNA.                   | 0.14  | 6.84  | 4.46E-17 | 1.66E-16 | midnightblue |
| BID      | 637    | BH3 interacting domain death agonist (BID), transcript variant 1, mRNA.       | -0.04 | 7.39  | 8.06E-03 | 1.16E-02 | midnightblue |
| BTBD2    | 55643  | BTB (POZ) domain containing 2 (BTBD2), mRNA.                                  | -0.12 | 7.71  | 6.69E-14 | 2.10E-13 | midnightblue |
| C17orf53 | 78995  | chromosome 17 open reading frame 53 (C17orf53), mRNA.                         | 0.05  | 7.75  | 1.22E-03 | 1.91E-03 | midnightblue |
| C19orf54 | 284325 | chromosome 19 open reading frame 54 (C19orf54), mRNA.                         | -0.11 | 7.64  | 1.36E-06 | 2.74E-06 | midnightblue |
| CALM3    | 808    | calmodulin 3 (phosphorylase kinase, delta) (CALM3), mRNA.                     | -0.34 | 6.24  | 1.24E-39 | 1.22E-38 | midnightblue |
| CAPN1    | 823    | calpain 1, (mu/I) large subunit (CAPN1), mRNA.                                | 0.14  | 8.23  | 1.31E-12 | 3.81E-12 | midnightblue |
| CCDC25   | 55246  | coiled-coil domain containing 25 (CCDC25), mRNA.                              | -0.02 | 9.23  | 2.09E-01 | 2.47E-01 | midnightblue |
| CCDC92   | 80212  | coiled-coil domain containing 92 (CCDC92), mRNA.                              | -0.06 | 10.23 | 2.29E-06 | 4.56E-06 | midnightblue |
| CCND3    | 896    | cyclin D3 (CCND3), mRNA.                                                      | 0.19  | 9.48  | 1.95E-36 | 1.68E-35 | midnightblue |

|         |        |                                                                         |       |       |          |          |              |
|---------|--------|-------------------------------------------------------------------------|-------|-------|----------|----------|--------------|
| CCNY    | 219771 | cyclin Y (CCNY), transcript variant 1, mRNA.                            | 0.02  | 9.38  | 3.75E-01 | 4.21E-01 | midnightblue |
| CD81    | 975    | CD81 molecule (CD81), mRNA.                                             | -0.13 | 8.58  | 4.67E-19 | 1.91E-18 | midnightblue |
| CENPB   | 1059   | centromere protein B, 80kDa (CENPB), mRNA.                              | 0.27  | 10.42 | 6.82E-43 | 7.90E-42 | midnightblue |
| CENPBD1 | 92806  | hypothetical protein MGC16385 (MGC16385), mRNA.                         | -0.19 | 6.40  | 9.46E-18 | 3.63E-17 | midnightblue |
| CFDP1   | 10428  | craniofacial development protein 1 (CFDP1), mRNA.                       | 0.01  | 11.34 | 4.66E-01 | 5.12E-01 | midnightblue |
| CHIC2   | 26511  | cysteine-rich hydrophobic domain 2 (CHIC2), mRNA.                       | -0.24 | 6.69  | 2.76E-25 | 1.51E-24 | midnightblue |
| CSNK1D  | 1453   | casein kinase 1, delta (CSNK1D), transcript variant 1, mRNA.            | 0.10  | 7.93  | 1.78E-08 | 4.07E-08 | midnightblue |
| CUTC    | 51076  | cutC copper transporter homolog (E. coli) (CUTC), mRNA.                 | 0.04  | 5.63  | 1.00E-02 | 1.42E-02 | midnightblue |
| DIS3L   | 115752 | DIS3 mitotic control homolog (S. cerevisiae)-like (DIS3L), mRNA.        | -0.01 | 8.15  | 3.39E-01 | 3.84E-01 | midnightblue |
| DPH3    | 285381 | DPH3, KTI11 homolog (S. cerevisiae) (DPH3), transcript variant 1, mRNA. | -0.17 | 8.62  | 8.49E-25 | 4.58E-24 | midnightblue |
| EAF2    | 55840  | ELL associated factor 2 (EAF2), mRNA.                                   | 0.10  | 9.04  | 1.28E-11 | 3.53E-11 | midnightblue |
| EHD1    | 10938  | EH-domain containing 1 (EHD1), mRNA.                                    | 2.15  | 6.88  | 3.62E-89 | 6.57E-87 | midnightblue |
| EMILIN2 | 84034  | elastin microfibril interfacier 2 (EMILIN2), mRNA.                      | -0.10 | 8.15  | 1.18E-15 | 4.04E-15 | midnightblue |



|         |       |                                                                                   |       |       |          |          |              |
|---------|-------|-----------------------------------------------------------------------------------|-------|-------|----------|----------|--------------|
| ENKD1   | 84080 | chromosome 16 open reading frame 48 (C16orf48), mRNA.                             | 0.02  | 11.39 | 1.74E-01 | 2.08E-01 | midnightblue |
| ESD     | 2098  | esterase D/formylglutathione hydrolase (ESD), mRNA.                               | 0.11  | 8.56  | 1.44E-08 | 3.31E-08 | midnightblue |
| FAM110A | 83541 | chromosome 20 open reading frame 55 (C20orf55), transcript variant 2, mRNA.       | -0.04 | 11.41 | 1.64E-03 | 2.54E-03 | midnightblue |
| FAM65A  | 79567 | family with sequence similarity 65, member A (FAM65A), mRNA.                      | 0.20  | 7.89  | 1.19E-24 | 6.39E-24 | midnightblue |
| FANCG   | 2189  | Fanconi anemia, complementation group G (FANCG), mRNA.                            | -0.04 | 8.14  | 1.43E-04 | 2.46E-04 | midnightblue |
| FN3KRP  | 79672 | fructosamine-3-kinase-related protein (FN3KRP), mRNA.                             | 0.81  | 6.81  | 2.22E-85 | 2.90E-83 | midnightblue |
| GLTSCR2 | 29997 | glioma tumor suppressor candidate region gene 2 (GLTSCR2), mRNA.                  | 0.09  | 8.25  | 3.53E-13 | 1.06E-12 | midnightblue |
| HES6    | 55502 | hairy and enhancer of split 6 (Drosophila) (HES6), mRNA.                          | 0.13  | 8.31  | 9.87E-17 | 3.61E-16 | midnightblue |
| HPS6    | 79803 | Hermansky-Pudlak syndrome 6 (HPS6), mRNA.                                         | -0.08 | 8.13  | 5.85E-09 | 1.39E-08 | midnightblue |
| IL4R    | 3566  | interleukin 4 receptor (IL4R), transcript variant 1, mRNA.                        | -0.10 | 7.67  | 1.74E-15 | 5.91E-15 | midnightblue |
| IMPDH1  | 3614  | IMP (inosine monophosphate) dehydrogenase 1 (IMPDH1), transcript variant 1, mRNA. | -0.22 | 6.32  | 1.18E-27 | 7.14E-27 | midnightblue |

|          |        |                                                                               |       |      |          |          |              |
|----------|--------|-------------------------------------------------------------------------------|-------|------|----------|----------|--------------|
| IRF5     | 3663   | interferon regulatory factor 5 (IRF5), transcript variant 1, mRNA.            | 0.20  | 6.45 | 2.82E-34 | 2.19E-33 | midnightblue |
| ISOC1    | 51015  | isochorismatase domain containing 1 (ISOC1), mRNA.                            | -0.14 | 6.99 | 1.99E-15 | 6.71E-15 | midnightblue |
| KATNB1   | 10300  | katanin p80 (WD repeat containing) subunit B 1 (KATNB1), mRNA.                | 0.06  | 7.19 | 1.16E-05 | 2.20E-05 | midnightblue |
| KCTD17   | 79734  | potassium channel tetramerisation domain containing 17 (KCTD17), mRNA.        | -0.07 | 5.48 | 5.56E-05 | 9.89E-05 | midnightblue |
| KIF2C    | 11004  | kinesin family member 2C (KIF2C), mRNA.                                       | -0.17 | 7.56 | 3.53E-21 | 1.59E-20 | midnightblue |
| LEF1     | 51176  | lymphoid enhancer-binding factor 1 (LEF1), mRNA.                              | 0.26  | 5.45 | 1.77E-25 | 9.80E-25 | midnightblue |
| LRRC20   | 55222  | leucine rich repeat containing 20 (LRRC20), transcript variant 3, mRNA.       | -0.17 | 7.95 | 9.43E-19 | 3.79E-18 | midnightblue |
| LRRC41   | 10489  | leucine rich repeat containing 41 (LRRC41), mRNA.                             | 0.10  | 6.19 | 1.49E-10 | 3.86E-10 | midnightblue |
| MAN1B1   | 11253  | mannosidase, alpha, class 1B, member 1 (MAN1B1), mRNA.                        | 0.04  | 9.19 | 2.92E-02 | 3.91E-02 | midnightblue |
| MANEAL   | 149175 | mannosidase, endo-alpha-like (MANEAL), transcript variant 1, mRNA.            | -0.27 | 7.52 | 5.51E-46 | 7.46E-45 | midnightblue |
| MAPKAPK3 | 7867   | mitogen-activated protein kinase-activated protein kinase 3 (MAPKAPK3), mRNA. | 0.09  | 5.54 | 3.66E-06 | 7.18E-06 | midnightblue |
| MFSD10   | 10227  | tetracycline transporter-like protein (TETRA10), mRNA.                        | -0.14 | 8.99 | 1.52E-29 | 9.66E-29 | midnightblue |

|         |        |                                                                                                                        |       |       |          |          |              |
|---------|--------|------------------------------------------------------------------------------------------------------------------------|-------|-------|----------|----------|--------------|
| MRPL21  | 219927 | mitochondrial ribosomal protein L21 (MRPL21), nuclear gene encoding mitochondrial protein, transcript variant 1, mRNA. | -0.06 | 7.15  | 1.39E-04 | 2.38E-04 | midnightblue |
| MTMR14  | 64419  | myotubularin related protein 14 (MTMR14), transcript variant 1, mRNA.                                                  | -0.31 | 9.65  | 1.29E-53 | 2.33E-52 | midnightblue |
| MUTYH   | 4595   | mutY homolog (E. coli) (MUTYH), mRNA.                                                                                  | 0.08  | 7.75  | 5.62E-10 | 1.41E-09 | midnightblue |
| MXD4    | 10608  | MAX dimerization protein 4 (MXD4), mRNA.                                                                               | -0.03 | 10.60 | 2.09E-03 | 3.19E-03 | midnightblue |
| MYD88   | 4615   | myeloid differentiation primary response gene (88) (MYD88), mRNA.                                                      | 0.09  | 6.93  | 3.06E-05 | 5.59E-05 | midnightblue |
| MYPOP   | 339344 | hypothetical protein LOC339344 (LOC339344), mRNA.                                                                      | -0.10 | 8.41  | 8.89E-13 | 2.61E-12 | midnightblue |
| NCKIPSD | 51517  | NCK interacting protein with SH3 domain (NCKIPSD), transcript variant 2, mRNA.                                         | 0.06  | 11.65 | 1.52E-05 | 2.85E-05 | midnightblue |
| NFKBIA  | 4792   | nuclear factor of kappa light polypeptide gene enhancer in B-cells inhibitor, alpha (NFKBIA), mRNA.                    | -0.03 | 6.05  | 3.67E-02 | 4.86E-02 | midnightblue |
| NLRX1   | 79671  | NLR family member X1 (NLRX1), transcript variant 2, mRNA.                                                              | 0.06  | 8.19  | 6.51E-08 | 1.44E-07 | midnightblue |
| NMI     | 9111   | N-myc (and STAT) interactor (NMI), mRNA.                                                                               | -0.06 | 5.68  | 4.21E-05 | 7.58E-05 | midnightblue |

|         |        |                                                                                                  |       |       |          |          |              |
|---------|--------|--------------------------------------------------------------------------------------------------|-------|-------|----------|----------|--------------|
| PACS1   | 55690  | phosphofurin acidic cluster sorting protein 1 (PACS1), mRNA.                                     | 0.19  | 9.39  | 7.08E-25 | 3.82E-24 | midnightblue |
| PARP10  | 84875  | poly (ADP-ribose) polymerase family, member 10 (PARP10), mRNA.                                   | -0.32 | 11.67 | 3.64E-43 | 4.27E-42 | midnightblue |
| PDCD2   | 5134   | programmed cell death 2 (PDCD2), transcript variant 2, mRNA.                                     | 0.03  | 8.09  | 3.07E-03 | 4.61E-03 | midnightblue |
| PDSS1   | 23590  | prenyl (decaprenyl) diphosphate synthase, subunit 1 (PDSS1), mRNA.                               | 0.10  | 7.66  | 2.50E-13 | 7.58E-13 | midnightblue |
| PIP4K2A | 5305   | phosphatidylinositol-4-phosphate 5-kinase, type II, alpha (PIP5K2A), mRNA.                       | -0.06 | 9.34  | 9.18E-04 | 1.46E-03 | midnightblue |
| PLGRKT  | 55848  | chromosome 9 open reading frame 46 (C9orf46), mRNA.                                              | -0.10 | 7.14  | 1.65E-11 | 4.51E-11 | midnightblue |
| POLR1C  | 9533   | polymerase (RNA) I polypeptide C, 30kDa (POLR1C), transcript variant 2, mRNA.                    | 0.03  | 10.66 | 1.39E-02 | 1.95E-02 | midnightblue |
| POLR3H  | 171568 | polymerase (RNA) III (DNA directed) polypeptide H (22.9kD) (POLR3H), transcript variant 4, mRNA. | -0.02 | 6.14  | 1.58E-01 | 1.91E-01 | midnightblue |
| PQLC1   | 80148  | PQ loop repeat containing 1 (PQLC1), mRNA.                                                       | 0.01  | 8.57  | 4.15E-01 | 4.61E-01 | midnightblue |
| PSAT1   | 29968  | phosphoserine aminotransferase 1 (PSAT1), transcript variant 2, mRNA.                            | 0.12  | 10.07 | 2.30E-17 | 8.68E-17 | midnightblue |
| PSMA4   | 5685   | proteasome (prosome, macropain) subunit, alpha type, 4 (PSMA4), mRNA.                            | -0.18 | 9.80  | 1.72E-23 | 8.65E-23 | midnightblue |

|          |        |                                                                                        |       |       |          |          |              |
|----------|--------|----------------------------------------------------------------------------------------|-------|-------|----------|----------|--------------|
| RASSF7   | 8045   | Ras association (RalGDS/AF-6) domain family 7 (RASSF7), mRNA.                          | 0.06  | 8.74  | 4.80E-06 | 9.35E-06 | midnightblue |
| RRNAD1   | 51093  | chromosome 1 open reading frame 66 (C1orf66), mRNA.                                    | -0.02 | 8.66  | 2.48E-01 | 2.88E-01 | midnightblue |
| RYK      | 6259   | RYK receptor-like tyrosine kinase (RYK), transcript variant 1, mRNA.                   | -0.01 | 8.98  | 4.04E-01 | 4.49E-01 | midnightblue |
| SARS2    | 54938  | seryl-tRNA synthetase 2, mitochondrial (SARS2), mRNA.                                  | 0.42  | 7.20  | 3.05E-63 | 1.02E-61 | midnightblue |
| SIX5     | 147912 | sine oculis homeobox homolog 5 (Drosophila) (SIX5), mRNA.                              | -0.01 | 11.80 | 2.83E-01 | 3.26E-01 | midnightblue |
| SLC25A28 | 81894  | solute carrier family 25, member 28 (SLC25A28), mRNA.                                  | -0.02 | 8.02  | 2.24E-01 | 2.63E-01 | midnightblue |
| SLC31A1  | 1317   | solute carrier family 31 (copper transporters), member 1 (SLC31A1), mRNA.              | -0.01 | 6.17  | 5.94E-01 | 6.36E-01 | midnightblue |
| SLC37A4  | 2542   | solute carrier family 37 (glycerol-6-phosphate transporter), member 4 (SLC37A4), mRNA. | 0.18  | 8.44  | 3.68E-26 | 2.09E-25 | midnightblue |
| SLC52A2  | 79581  | G protein-coupled receptor 172A (GPR172A), mRNA.                                       | -0.28 | 8.29  | 6.03E-42 | 6.67E-41 | midnightblue |
| SMIM14   | 201895 | chromosome 4 open reading frame 34 (C4orf34), mRNA.                                    | 0.11  | 9.19  | 4.18E-10 | 1.06E-09 | midnightblue |

|          |        |                                                                         |       |       |          |          |              |
|----------|--------|-------------------------------------------------------------------------|-------|-------|----------|----------|--------------|
| SPSB3    | 90864  | splA/ryanodine receptor domain and SOCS box containing 3 (SPSB3), mRNA. | 0.20  | 6.68  | 8.46E-23 | 4.14E-22 | midnightblue |
| SRP19    | 6728   | signal recognition particle 19kDa (SRP19), mRNA.                        | 0.10  | 7.74  | 7.69E-07 | 1.58E-06 | midnightblue |
| STX5     | 6811   | syntaxin 5A (STX5A), mRNA.                                              | 0.04  | 7.94  | 5.10E-04 | 8.33E-04 | midnightblue |
| TGOLN2   | 10618  | trans-golgi network protein 2 (TGOLN2), mRNA.                           | -0.69 | 10.29 | 7.13E-92 | 1.65E-89 | midnightblue |
| TIGD5    | 84948  | tigger transposable element derived 5 (TIGD5), mRNA.                    | 0.12  | 6.68  | 2.29E-17 | 8.62E-17 | midnightblue |
| TIMELESS | 8914   | timeless homolog (Drosophila) (TIMELESS), mRNA.                         | 0.05  | 8.58  | 9.24E-06 | 1.76E-05 | midnightblue |
| TNK2     | 10188  | tyrosine kinase, non-receptor, 2 (TNK2), transcript variant 1, mRNA.    | -0.24 | 6.33  | 2.00E-35 | 1.64E-34 | midnightblue |
| TP53I13  | 90313  | tumor protein p53 inducible protein 13 (TP53I13), mRNA.                 | -0.31 | 8.40  | 4.55E-40 | 4.58E-39 | midnightblue |
| TPRG1L   | 127262 | family with sequence similarity 79, member A (FAM79A), mRNA.            | 0.07  | 10.72 | 4.99E-07 | 1.04E-06 | midnightblue |
| TRIB3    | 57761  | tribbles homolog 3 (Drosophila) (TRIB3), mRNA.                          | -0.03 | 5.44  | 1.80E-01 | 2.16E-01 | midnightblue |
| TRIM21   | 6737   | tripartite motif-containing 21 (TRIM21), mRNA.                          | -0.15 | 8.43  | 1.25E-26 | 7.20E-26 | midnightblue |
| TSC22D4  | 81628  | TSC22 domain family, member 4 (TSC22D4), mRNA.                          | 0.11  | 6.33  | 2.90E-12 | 8.27E-12 | midnightblue |
| UBE2T    | 29089  | ubiquitin-conjugating enzyme E2T (putative) (UBE2T), mRNA.              | -0.08 | 9.60  | 4.97E-11 | 1.32E-10 | midnightblue |

|          |        |                                                                                                        |       |      |          |          |              |
|----------|--------|--------------------------------------------------------------------------------------------------------|-------|------|----------|----------|--------------|
| UCHL3    | 7347   | ubiquitin carboxyl-terminal esterase L3 (ubiquitin thiolesterase) (UCHL3), mRNA.                       | -0.25 | 9.29 | 6.80E-51 | 1.10E-49 | midnightblue |
| WDR61    | 80349  | WD repeat domain 61 (WDR61), mRNA.                                                                     | -0.46 | 6.01 | 3.56E-40 | 3.62E-39 | midnightblue |
| WRAP53   | 55135  | WD repeat domain 79 (WDR79), mRNA.                                                                     | -0.23 | 7.36 | 6.35E-17 | 2.34E-16 | midnightblue |
| XYLT2    | 64132  | xylosyltransferase II (XYLT2), mRNA.                                                                   | -0.01 | 6.91 | 4.42E-01 | 4.88E-01 | midnightblue |
| ZFP90    | 146198 | zinc finger protein 90 homolog (mouse) (ZFP90), mRNA.                                                  | -0.16 | 8.89 | 9.04E-22 | 4.19E-21 | midnightblue |
| AASDHPPT | 60496  | aminoadipate-semialdehyde dehydrogenase-phosphopantetheinyl transferase (AASDHPPT), mRNA.              | -0.15 | 9.94 | 2.28E-15 | 7.66E-15 | pink         |
| ACOT7    | 11332  | acyl-CoA thioesterase 7 (ACOT7), transcript variant hBACHb, mRNA.                                      | -0.07 | 7.59 | 5.12E-05 | 9.14E-05 | pink         |
| ADPRHL2  | 54936  | ADP-ribosylhydrolase like 2 (ADPRHL2), mRNA.                                                           | 0.00  | 6.67 | 8.51E-01 | 8.73E-01 | pink         |
| AHCY     | 191    | S-adenosylhomocysteine hydrolase (AHCY), mRNA.                                                         | -0.50 | 8.21 | 1.02E-56 | 2.23E-55 | pink         |
| ALG6     | 29929  | asparagine-linked glycosylation 6 homolog (S. cerevisiae, alpha-1,3-glucosyltransferase) (ALG6), mRNA. | -0.02 | 9.11 | 2.78E-02 | 3.73E-02 | pink         |

|          |        |                                                                                                                              |       |      |          |          |      |
|----------|--------|------------------------------------------------------------------------------------------------------------------------------|-------|------|----------|----------|------|
| ALG8     | 79053  | asparagine-linked glycosylation 8 homolog (S. cerevisiae, alpha-1,3-glucosyltransferase) (ALG8), transcript variant 1, mRNA. | -0.16 | 7.85 | 2.28E-21 | 1.04E-20 | pink |
| ALKBH6   | 84964  | alkB, alkylation repair homolog 6 (E. coli) (ALKBH6), transcript variant 1, mRNA.                                            | 0.01  | 9.10 | 7.34E-01 | 7.65E-01 | pink |
| ALKBH7   | 84266  | alkB, alkylation repair homolog 7 (E. coli) (ALKBH7), mRNA.                                                                  | 0.05  | 9.37 | 9.88E-06 | 1.88E-05 | pink |
| ALOX5AP  | 241    | arachidonate 5-lipoxygenase-activating protein (ALOX5AP), mRNA.                                                              | -0.01 | 6.51 | 3.78E-01 | 4.23E-01 | pink |
| APEX1    | 328    | APEX nuclease (multifunctional DNA repair enzyme) 1 (APEX1), transcript variant 2, mRNA.                                     | -0.30 | 6.50 | 2.38E-46 | 3.30E-45 | pink |
| API5     | 8539   | apoptosis inhibitor 5 (API5), mRNA.                                                                                          | 0.00  | 7.95 | 9.56E-01 | 9.62E-01 | pink |
| ARHGAP30 | 257106 | Rho GTPase activating protein 30 (ARHGAP30), transcript variant 1, mRNA.                                                     | -0.05 | 5.68 | 6.79E-04 | 1.09E-03 | pink |
| ARL2     | 402    | ADP-ribosylation factor-like 2 (ARL2), mRNA.                                                                                 | 0.02  | 9.98 | 1.82E-01 | 2.17E-01 | pink |
| ASCC3    | 10973  | activating signal cointegrator 1 complex subunit 3 (ASCC3), transcript variant 1, mRNA.                                      | 0.05  | 7.84 | 1.94E-04 | 3.29E-04 | pink |
| ASMTL    | 8623   | acetylserotonin O-methyltransferase-like (ASMTL), mRNA.                                                                      | -0.12 | 9.45 | 3.79E-19 | 1.56E-18 | pink |



|         |       |                                                                                                                                                                                |       |      |          |          |      |
|---------|-------|--------------------------------------------------------------------------------------------------------------------------------------------------------------------------------|-------|------|----------|----------|------|
| ATP5G2  | 517   | ATP synthase, H <sup>+</sup> transporting, mitochondrial F0 complex, subunit C2 (subunit 9) (ATP5G2), nuclear gene encoding mitochondrial protein, transcript variant 2, mRNA. | 0.12  | 8.37 | 1.77E-13 | 5.41E-13 | pink |
| ATPIF1  | 93974 | ATPase inhibitory factor 1 (ATPIF1), nuclear gene encoding mitochondrial protein, transcript variant 3, mRNA.                                                                  | 0.19  | 6.22 | 3.94E-21 | 1.77E-20 | pink |
| BATF3   | 55509 | Jun dimerization protein p21SNFT (SNFT), mRNA.                                                                                                                                 | -0.07 | 9.48 | 7.72E-03 | 1.11E-02 | pink |
| BCL2L10 | 10017 | BCL2-like 10 (apoptosis facilitator) (BCL2L10), mRNA.                                                                                                                          | 0.05  | 7.22 | 4.93E-04 | 8.08E-04 | pink |
| BCLAF1  | 9774  | BCL2-associated transcription factor 1 (BCLAF1), transcript variant 2, mRNA.                                                                                                   | -0.04 | 5.99 | 4.90E-02 | 6.40E-02 | pink |
| BCOR    | 54880 | BCL6 co-repressor (BCOR), transcript variant 1, mRNA.                                                                                                                          | -0.02 | 9.51 | 3.62E-02 | 4.80E-02 | pink |
| BLM     | 641   | Bloom syndrome (BLM), mRNA.                                                                                                                                                    | -0.08 | 9.45 | 2.13E-11 | 5.81E-11 | pink |
| BMPR2   | 659   | bone morphogenetic protein receptor, type II (serine/threonine kinase) (BMPR2), mRNA.                                                                                          | -0.02 | 8.00 | 2.05E-01 | 2.43E-01 | pink |
| BRK1    | 55845 | chromosome 3 open reading frame 10 (C3orf10), mRNA.                                                                                                                            | -0.03 | 7.07 | 9.43E-03 | 1.35E-02 | pink |

|          |        |                                                                         |       |       |          |          |      |
|----------|--------|-------------------------------------------------------------------------|-------|-------|----------|----------|------|
| BRMS1L   | 84312  | breast cancer metastasis-suppressor 1-like (BRMS1L), mRNA.              | 0.02  | 11.63 | 5.36E-02 | 6.96E-02 | pink |
| C12orf10 | 60314  | chromosome 12 open reading frame 10 (C12orf10), mRNA.                   | -0.05 | 9.60  | 6.93E-02 | 8.87E-02 | pink |
| C1orf50  | 79078  | chromosome 1 open reading frame 50 (C1orf50), mRNA.                     | 0.01  | 10.02 | 5.11E-01 | 5.56E-01 | pink |
| C20orf27 | 54976  | chromosome 20 open reading frame 27 (C20orf27), mRNA.                   | -0.16 | 8.54  | 1.20E-15 | 4.13E-15 | pink |
| C6orf1   | 221491 | chromosome 6 open reading frame 1 (C6orf1), transcript variant 1, mRNA. | 0.05  | 9.92  | 1.29E-04 | 2.22E-04 | pink |
| C6orf62  | 81688  | chromosome 6 open reading frame 62 (C6orf62), mRNA.                     | 0.74  | 6.14  | 1.51E-75 | 9.15E-74 | pink |
| C7orf50  | 84310  | hypothetical protein MGC11257 (MGC11257), mRNA.                         | 0.11  | 8.28  | 5.73E-09 | 1.36E-08 | pink |
| CAPZA2   | 830    | capping protein (actin filament) muscle Z-line, alpha 2 (CAPZA2), mRNA. | 0.07  | 7.05  | 1.80E-02 | 2.48E-02 | pink |
| CASC4    | 113201 | cancer susceptibility candidate 4 (CASC4), transcript variant 2, mRNA.  | -0.03 | 6.82  | 5.36E-02 | 6.96E-02 | pink |
| CBX7     | 23492  | chromobox homolog 7 (CBX7), mRNA.                                       | -0.44 | 6.33  | 4.21E-58 | 1.02E-56 | pink |
| CCDC106  | 29903  | coiled-coil domain containing 106 (CCDC106), mRNA.                      | -0.17 | 10.78 | 3.93E-23 | 1.95E-22 | pink |

|        |        |                                                                                            |       |      |          |          |      |
|--------|--------|--------------------------------------------------------------------------------------------|-------|------|----------|----------|------|
| CDCA4  | 55038  | cell division cycle associated 4 (CDCA4), transcript variant 13, mRNA.                     | -0.25 | 6.50 | 4.05E-22 | 1.91E-21 | pink |
| CDCA7L | 55536  | cell division cycle associated 7-like (CDCA7L), mRNA.                                      | -0.06 | 6.79 | 8.44E-05 | 1.48E-04 | pink |
| CDK19  | 23097  | cell division cycle 2-like 6 (CDK8-like) (CDC2L6), mRNA.                                   | 0.29  | 8.77 | 1.65E-27 | 9.89E-27 | pink |
| CENPN  | 55839  | centromere protein N (CENPN), mRNA.                                                        | 0.11  | 8.84 | 1.71E-08 | 3.93E-08 | pink |
| CEP350 | 9857   | centrosomal protein 350kDa (CEP350), mRNA.                                                 | 0.06  | 8.85 | 8.89E-05 | 1.56E-04 | pink |
| CLIC1  | 1192   | chloride intracellular channel 1 (CLIC1), mRNA.                                            | -0.09 | 8.43 | 1.79E-09 | 4.36E-09 | pink |
| COA7   | 65260  | chromosome 1 open reading frame 163 (C1orf163), mRNA.                                      | -0.07 | 8.93 | 2.41E-03 | 3.65E-03 | pink |
| COMMD7 | 149951 | COMM domain containing 7 (COMMD7), mRNA.                                                   | 0.00  | 8.40 | 7.89E-01 | 8.16E-01 | pink |
| COPB1  | 1315   | coatamer protein complex, subunit beta 1 (COPB1), mRNA.                                    | 0.14  | 7.43 | 5.67E-15 | 1.87E-14 | pink |
| CPNE3  | 8895   | copine III (CPNE3), mRNA.                                                                  | 0.03  | 6.76 | 4.04E-02 | 5.33E-02 | pink |
| CPSF4  | 10898  | cleavage and polyadenylation specific factor 4, 30kDa (CPSF4), transcript variant 1, mRNA. | 0.26  | 8.18 | 4.82E-50 | 7.58E-49 | pink |
| CREBRF | 153222 | adult retina protein (LOC153222), mRNA.                                                    | -0.03 | 6.28 | 6.19E-02 | 7.98E-02 | pink |
| CSE1L  | 1434   | CSE1 chromosome segregation 1-like (yeast) (CSE1L), mRNA.                                  | -0.30 | 6.76 | 2.36E-40 | 2.42E-39 | pink |

|        |        |                                                                                                         |       |       |          |          |      |
|--------|--------|---------------------------------------------------------------------------------------------------------|-------|-------|----------|----------|------|
| DCAF7  | 10238  | WD repeat domain 68 (WDR68), mRNA.                                                                      | 0.18  | 9.80  | 2.20E-23 | 1.10E-22 | pink |
| DEDD2  | 162989 | death effector domain containing 2 (DEDD2), mRNA.                                                       | -0.03 | 10.34 | 1.59E-02 | 2.20E-02 | pink |
| DEF6   | 50619  | differentially expressed in FDCP 6 homolog (mouse) (DEF6), mRNA.                                        | 0.03  | 7.81  | 1.51E-02 | 2.10E-02 | pink |
| DESI2  | 51029  | chromosome 1 open reading frame 121 (C1orf121), mRNA.                                                   | 0.34  | 10.69 | 1.80E-48 | 2.72E-47 | pink |
| DGKQ   | 1609   | diacylglycerol kinase, theta 110kDa (DGKQ), mRNA.                                                       | -0.02 | 7.50  | 2.73E-01 | 3.16E-01 | pink |
| DGUOK  | 1716   | deoxyguanosine kinase (DGUOK), nuclear gene encoding mitochondrial protein, transcript variant 2, mRNA. | -0.08 | 5.59  | 1.10E-04 | 1.91E-04 | pink |
| DHX15  | 1665   | DEAH (Asp-Glu-Ala-His) box polypeptide 15 (DHX15), mRNA.                                                | -0.07 | 7.59  | 1.52E-03 | 2.35E-03 | pink |
| DMTF1  | 9988   | cyclin D binding myb-like transcription factor 1 (DMTF1), mRNA.                                         | -0.06 | 7.79  | 5.69E-04 | 9.25E-04 | pink |
| DPCD   | 25911  | deleted in a mouse model of primary ciliary dyskinesia (RP11-529I10.4), mRNA.                           | 0.05  | 7.06  | 1.34E-04 | 2.31E-04 | pink |
| DROSHA | 29102  | ribonuclease III, nuclear (RNASEN), mRNA.                                                               | 0.01  | 7.34  | 2.23E-01 | 2.62E-01 | pink |
| DUSP10 | 11221  | dual specificity phosphatase 10 (DUSP10), transcript variant 1, mRNA.                                   | -0.13 | 5.82  | 7.66E-14 | 2.39E-13 | pink |

|          |        |                                                                                                                                        |       |       |          |          |      |
|----------|--------|----------------------------------------------------------------------------------------------------------------------------------------|-------|-------|----------|----------|------|
| ECI1     | 1632   | dodecenoyl-Coenzyme A delta isomerase (3,2 trans-enoyl-Coenzyme A isomerase) (DCI), nuclear gene encoding mitochondrial protein, mRNA. | -0.01 | 12.25 | 5.57E-01 | 6.01E-01 | pink |
| EIF4B    | 1975   | eukaryotic translation initiation factor 4B (EIF4B), mRNA.                                                                             | 0.39  | 7.50  | 2.40E-64 | 8.40E-63 | pink |
| EIF4EBP2 | 1979   | eukaryotic translation initiation factor 4E binding protein 2 (EIF4EBP2), mRNA.                                                        | -0.03 | 7.77  | 7.06E-03 | 1.02E-02 | pink |
| EMC9     | 51016  | chromosome 14 open reading frame 122 (C14orf122), mRNA.                                                                                | -0.04 | 8.71  | 1.79E-03 | 2.76E-03 | pink |
| EMD      | 2010   | emerin (Emery-Dreifuss muscular dystrophy) (EMD), mRNA.                                                                                | -0.01 | 7.68  | 4.93E-01 | 5.38E-01 | pink |
| EMP3     | 2014   | epithelial membrane protein 3 (EMP3), mRNA.                                                                                            | 0.03  | 8.28  | 1.05E-02 | 1.48E-02 | pink |
| EXOSC7   | 23016  | exosome component 7 (EXOSC7), mRNA.                                                                                                    | -0.08 | 6.49  | 2.66E-07 | 5.65E-07 | pink |
| FAM212A  | 389119 | chromosome 3 open reading frame 54 (C3orf54), mRNA.                                                                                    | 0.16  | 6.88  | 7.99E-19 | 3.22E-18 | pink |
| FAM50A   | 9130   | family with sequence similarity 50, member A (FAM50A), mRNA.                                                                           | 0.14  | 7.47  | 1.63E-07 | 3.51E-07 | pink |
| FAM58A   | 92002  | family with sequence similarity 58, member A (FAM58A), mRNA.                                                                           | 0.04  | 8.97  | 2.50E-02 | 3.39E-02 | pink |
| FBL      | 2091   | fibrillarin (FBL), mRNA.                                                                                                               | 0.09  | 9.24  | 8.09E-09 | 1.89E-08 | pink |

|         |        |                                                                                                                   |       |       |          |          |      |
|---------|--------|-------------------------------------------------------------------------------------------------------------------|-------|-------|----------|----------|------|
| FECH    | 2235   | ferrochelatase (protoporphyrin) (FECH), nuclear gene encoding mitochondrial protein, transcript variant 2, mRNA.  | 0.03  | 8.17  | 4.47E-02 | 5.87E-02 | pink |
| FEZ2    | 9637   | fasciculation and elongation protein zeta 2 (zyglin II) (FEZ2), transcript variant 2, mRNA.                       | -0.06 | 6.36  | 4.29E-05 | 7.72E-05 | pink |
| FIBP    | 9158   | fibroblast growth factor (acidic) intracellular binding protein (FIBP), transcript variant 2, mRNA.               | 0.58  | 8.01  | 7.06E-57 | 1.57E-55 | pink |
| FOPNL   | 123811 | chromosome 16 open reading frame 63 (C16orf63), mRNA.                                                             | 0.01  | 6.56  | 2.29E-01 | 2.69E-01 | pink |
| FTSJ1   | 24140  | FtsJ homolog 1 (E. coli) (FTSJ1), transcript variant 2, mRNA.                                                     | -0.05 | 7.89  | 5.01E-07 | 1.04E-06 | pink |
| GALNT11 | 63917  | UDP-N-acetyl-alpha-D-galactosamine:polypeptide N-acetylgalactosaminyltransferase 11 (GalNAc-T11) (GALNT11), mRNA. | 0.74  | 7.54  | 5.70E-90 | 1.16E-87 | pink |
| GFOD2   | 81577  | glucose-fructose oxidoreductase domain containing 2 (GFOD2), mRNA.                                                | 0.04  | 11.05 | 1.28E-04 | 2.21E-04 | pink |
| GLMP    | 112770 | chromosome 1 open reading frame 85 (C1orf85), mRNA.                                                               | -0.15 | 9.57  | 2.84E-15 | 9.52E-15 | pink |
| GM2A    | 2760   | GM2 ganglioside activator (GM2A), mRNA.                                                                           | 0.39  | 6.04  | 3.63E-31 | 2.47E-30 | pink |

|          |       |                                                                                                                                |       |       |          |          |      |
|----------|-------|--------------------------------------------------------------------------------------------------------------------------------|-------|-------|----------|----------|------|
| GMDS     | 2762  | GDP-mannose 4,6-dehydratase (GMDS), mRNA.                                                                                      | -0.11 | 6.23  | 4.28E-11 | 1.14E-10 | pink |
| GNA13    | 10672 | guanine nucleotide binding protein (G protein), alpha 13 (GNA13), mRNA.                                                        | -0.05 | 8.16  | 3.05E-03 | 4.57E-03 | pink |
| GOLPH3   | 64083 | golgi phosphoprotein 3 (coat-protein) (GOLPH3), mRNA.                                                                          | 0.13  | 8.58  | 1.43E-11 | 3.92E-11 | pink |
| GSDMD    | 79792 | gasdermin domain containing 1 (GSDMDC1), mRNA.                                                                                 | -0.23 | 8.50  | 4.57E-41 | 4.80E-40 | pink |
| GTF3C2   | 2976  | general transcription factor IIIC, polypeptide 2, beta 110kDa (GTF3C2), transcript variant 1, mRNA.                            | 0.05  | 6.75  | 2.39E-04 | 4.03E-04 | pink |
| HAUS7    | 55559 | UCHL5 interacting protein (UCHL5IP), transcript variant 2, mRNA.                                                               | -0.01 | 12.37 | 4.86E-01 | 5.31E-01 | pink |
| HECTD1   | 25831 | HECT domain containing 1 (HECTD1), mRNA.                                                                                       | -0.20 | 9.21  | 5.29E-35 | 4.22E-34 | pink |
| HNRNPR   | 10236 | heterogeneous nuclear ribonucleoprotein R (HNRPR), mRNA.                                                                       | -0.02 | 8.89  | 1.58E-01 | 1.91E-01 | pink |
| HPS1     | 3257  | Hermansky-Pudlak syndrome 1 (HPS1), transcript variant 3, mRNA.                                                                | -0.11 | 9.87  | 1.43E-14 | 4.64E-14 | pink |
| HSD17B10 | 3028  | hydroxysteroid (17-beta) dehydrogenase 10 (HSD17B10), nuclear gene encoding mitochondrial protein, transcript variant 2, mRNA. | -0.05 | 6.52  | 2.64E-03 | 3.98E-03 | pink |

|           |        |                                                                                       |       |       |          |          |      |
|-----------|--------|---------------------------------------------------------------------------------------|-------|-------|----------|----------|------|
| IARS2     | 55699  | isoleucyl-tRNA synthetase 2, mitochondrial (IARS2), mRNA.                             | -0.24 | 6.21  | 8.22E-34 | 6.22E-33 | pink |
| IMMT      | 10989  | inner membrane protein, mitochondrial (mitofilin) (IMMT), mRNA.                       | 0.03  | 6.73  | 1.20E-01 | 1.49E-01 | pink |
| INPP5E    | 56623  | inositol polyphosphate-5-phosphatase, 72 kDa (INPP5E), mRNA.                          | 0.00  | 5.81  | 8.43E-01 | 8.66E-01 | pink |
| IVNS1ABP  | 10625  | influenza virus NS1A binding protein (IVNS1ABP), transcript variant 2, mRNA.          | -0.09 | 7.60  | 4.29E-09 | 1.02E-08 | pink |
| KIDINS220 | 57498  | kinase D-interacting substance of 220 kDa (KIDINS220), mRNA.                          | 0.21  | 8.71  | 2.09E-25 | 1.15E-24 | pink |
| KLF12     | 11278  | Kruppel-like factor 12 (KLF12), mRNA.                                                 | -0.13 | 7.06  | 5.70E-10 | 1.43E-09 | pink |
| KLHL36    | 79786  | chromosome 16 open reading frame 44 (C16orf44), mRNA.                                 | -0.15 | 5.76  | 2.44E-13 | 7.40E-13 | pink |
| LAMTOR1   | 55004  | chromosome 11 open reading frame 59 (C11orf59), mRNA.                                 | 0.00  | 11.78 | 9.97E-01 | 9.98E-01 | pink |
| LCMT2     | 9836   | leucine carboxyl methyltransferase 2 (LCMT2), mRNA.                                   | 0.24  | 7.51  | 1.51E-37 | 1.37E-36 | pink |
| LEO1      | 123169 | Leo1, Paf1/RNA polymerase II complex component, homolog (S. cerevisiae) (LEO1), mRNA. | 0.01  | 8.36  | 4.95E-01 | 5.40E-01 | pink |
| LMNA      | 4000   | lamin A/C (LMNA), transcript variant 2, mRNA.                                         | -0.18 | 6.13  | 9.09E-16 | 3.14E-15 | pink |



|        |        |                                                                                                      |       |      |          |          |      |
|--------|--------|------------------------------------------------------------------------------------------------------|-------|------|----------|----------|------|
| LRRC23 | 10233  | leucine rich repeat containing 23 (LRRC23), transcript variant 2, mRNA.                              | 0.07  | 7.73 | 4.35E-06 | 8.50E-06 | pink |
| LSM14A | 26065  | LSM14A, SCD6 homolog A (S. cerevisiae) (LSM14A), mRNA.                                               | 0.54  | 8.30 | 1.40E-69 | 6.28E-68 | pink |
| LSM2   | 57819  | LSM2 homolog, U6 small nuclear RNA associated (S. cerevisiae) (LSM2), mRNA.                          | -0.02 | 7.80 | 2.43E-01 | 2.84E-01 | pink |
| MCCC1  | 56922  | methylcrotonoyl-Coenzyme A carboxylase 1 (alpha) (MCCC1), mRNA.                                      | 0.05  | 8.35 | 3.99E-03 | 5.92E-03 | pink |
| MED10  | 84246  | mediator of RNA polymerase II transcription, subunit 10 homolog (NUT2, S. cerevisiae) (MED10), mRNA. | 0.13  | 8.91 | 5.94E-12 | 1.67E-11 | pink |
| MED19  | 219541 | mediator of RNA polymerase II transcription, subunit 19 homolog (S. cerevisiae) (MED19), mRNA.       | -0.06 | 7.87 | 1.50E-03 | 2.33E-03 | pink |
| METAP2 | 10988  | methionyl aminopeptidase 2 (METAP2), mRNA.                                                           | -0.77 | 6.46 | 9.38E-35 | 7.36E-34 | pink |
| MFF    | 56947  | chromosome 2 open reading frame 33 (C2orf33), mRNA.                                                  | -0.23 | 7.40 | 1.44E-24 | 7.68E-24 | pink |
| MFSD1  | 64747  | major facilitator superfamily domain containing 1 (MFSD1), mRNA.                                     | -0.03 | 8.42 | 2.18E-01 | 2.57E-01 | pink |
| MICA   | 4276   | MHC class I polypeptide-related sequence A (MICA), mRNA.                                             | -0.49 | 7.00 | 2.20E-63 | 7.39E-62 | pink |

|        |       |                                                                                                                        |       |       |          |          |      |
|--------|-------|------------------------------------------------------------------------------------------------------------------------|-------|-------|----------|----------|------|
| MICB   | 4277  | MHC class I polypeptide-related sequence B (MICB), mRNA.                                                               | -0.10 | 7.31  | 6.67E-12 | 1.86E-11 | pink |
| MIF4GD | 57409 | MIF4G domain containing (MIF4GD), mRNA.                                                                                | -0.08 | 8.33  | 1.22E-04 | 2.11E-04 | pink |
| MMGT1  | 93380 | transmembrane protein 32 (TMEM32), mRNA.                                                                               | 0.03  | 8.11  | 5.57E-02 | 7.22E-02 | pink |
| MOK    | 5891  | renal tumor antigen (RAGE), mRNA.                                                                                      | -0.07 | 5.88  | 1.63E-04 | 2.78E-04 | pink |
| MPDU1  | 9526  | mannose-P-dolichol utilization defect 1 (MPDU1), mRNA.                                                                 | -0.06 | 10.74 | 1.77E-05 | 3.31E-05 | pink |
| MPND   | 84954 | MPN domain containing (MPND), mRNA.                                                                                    | 0.19  | 9.27  | 3.72E-28 | 2.28E-27 | pink |
| MRGBP  | 55257 | chromosome 20 open reading frame 20 (C20orf20), mRNA.                                                                  | -0.02 | 5.65  | 2.22E-01 | 2.62E-01 | pink |
| MRPL11 | 65003 | mitochondrial ribosomal protein L11 (MRPL11), nuclear gene encoding mitochondrial protein, transcript variant 3, mRNA. | -0.17 | 7.54  | 7.57E-19 | 3.06E-18 | pink |
| MRPL17 | 63875 | mitochondrial ribosomal protein L17 (MRPL17), nuclear gene encoding mitochondrial protein, mRNA.                       | 0.01  | 7.80  | 3.86E-01 | 4.31E-01 | pink |
| MRPL20 | 55052 | mitochondrial ribosomal protein L20 (MRPL20), nuclear gene encoding mitochondrial protein, mRNA.                       | 0.12  | 7.75  | 4.33E-17 | 1.61E-16 | pink |

|         |        |                                                                                                  |       |       |          |          |      |
|---------|--------|--------------------------------------------------------------------------------------------------|-------|-------|----------|----------|------|
| MRPS26  | 64949  | mitochondrial ribosomal protein S26 (MRPS26), nuclear gene encoding mitochondrial protein, mRNA. | 0.29  | 7.07  | 3.03E-28 | 1.86E-27 | pink |
| MRPS7   | 51081  | mitochondrial ribosomal protein S7 (MRPS7), nuclear gene encoding mitochondrial protein, mRNA.   | 0.00  | 7.44  | 9.07E-01 | 9.22E-01 | pink |
| MTHFD1L | 25902  | methylenetetrahydrofolate dehydrogenase (NADP+ dependent) 1-like (MTHFD1L), mRNA.                | 0.03  | 8.09  | 3.18E-02 | 4.24E-02 | pink |
| MVB12A  | 93343  | family with sequence similarity 125, member A (FAM125A), mRNA.                                   | -0.26 | 11.17 | 4.61E-42 | 5.16E-41 | pink |
| MYCBP2  | 23077  | MYC binding protein 2 (MYCBP2), mRNA.                                                            | 0.00  | 6.64  | 8.67E-01 | 8.87E-01 | pink |
| NA      | 8214   | DiGeorge syndrome critical region gene 6 (DGCR6), mRNA.                                          | -0.33 | 6.44  | 1.79E-43 | 2.12E-42 | pink |
| NA      | 84163  | GTF2I repeat domain containing 2 (GTF2IRD2), mRNA.                                               | -0.20 | 6.44  | 2.10E-24 | 1.11E-23 | pink |
| NA      | 85359  | DiGeorge syndrome critical region gene 6-like (DGCR6L), mRNA.                                    | -0.02 | 7.10  | 2.41E-01 | 2.81E-01 | pink |
| NA      | 136319 | myotrophin (MTPN), mRNA.                                                                         | -0.02 | 8.35  | 2.41E-01 | 2.82E-01 | pink |
| NAA20   | 51126  | N-acetyltransferase 5 (NAT5), transcript variant 2, mRNA.                                        | -0.15 | 8.51  | 1.45E-19 | 6.07E-19 | pink |

|        |        |                                                                                                                           |       |      |          |          |      |
|--------|--------|---------------------------------------------------------------------------------------------------------------------------|-------|------|----------|----------|------|
| NAP1L1 | 4673   | nucleosome assembly protein 1-like 1 (NAP1L1), transcript variant 2, mRNA.                                                | 0.16  | 9.08 | 5.68E-15 | 1.87E-14 | pink |
| NDUFA8 | 4702   | NADH dehydrogenase (ubiquinone) 1 alpha subcomplex, 8, 19kDa (NDUFA8), nuclear gene encoding mitochondrial protein, mRNA. | 0.04  | 7.31 | 3.71E-03 | 5.53E-03 | pink |
| NDUFB8 | 4714   | NADH dehydrogenase (ubiquinone) 1 beta subcomplex, 8, 19kDa (NDUFB8), mRNA.                                               | 0.49  | 6.96 | 9.13E-48 | 1.36E-46 | pink |
| NDUFS6 | 4726   | NADH dehydrogenase (ubiquinone) Fe-S protein 6, 13kDa (NADH-coenzyme Q reductase) (NDUFS6), mRNA.                         | 0.13  | 6.26 | 2.94E-12 | 8.38E-12 | pink |
| NDUFS7 | 374291 | NADH dehydrogenase (ubiquinone) Fe-S protein 7, 20kDa (NADH-coenzyme Q reductase) (NDUFS7), mRNA.                         | -0.36 | 5.99 | 4.31E-35 | 3.46E-34 | pink |
| NDUFS8 | 4728   | NADH dehydrogenase (ubiquinone) Fe-S protein 8, 23kDa (NADH-coenzyme Q reductase) (NDUFS8), mRNA.                         | -0.02 | 7.76 | 3.00E-01 | 3.44E-01 | pink |
| NMRAL1 | 57407  | NmrA-like family domain containing 1 (NMRAL1), mRNA.                                                                      | 0.11  | 7.87 | 2.39E-11 | 6.48E-11 | pink |

|        |        |                                                                                                                          |       |       |          |          |      |
|--------|--------|--------------------------------------------------------------------------------------------------------------------------|-------|-------|----------|----------|------|
| NNT    | 23530  | nicotinamide nucleotide transhydrogenase (NNT), nuclear gene encoding mitochondrial protein, transcript variant 2, mRNA. | -0.01 | 10.87 | 6.45E-01 | 6.83E-01 | pink |
| NOL8   | 55035  | nucleolar protein 8 (NOL8), mRNA.                                                                                        | -0.14 | 6.74  | 3.57E-19 | 1.47E-18 | pink |
| NOSIP  | 51070  | nitric oxide synthase interacting protein (NOSIP), mRNA.                                                                 | 0.05  | 7.71  | 3.58E-03 | 5.35E-03 | pink |
| NSMCE2 | 286053 | non-SMC element 2, MMS21 homolog ( <i>S. cerevisiae</i> ) (NSMCE2), mRNA.                                                | 0.13  | 6.15  | 2.56E-17 | 9.59E-17 | pink |
| NT5C   | 30833  | 5', 3'-nucleotidase, cytosolic (NT5C), mRNA.                                                                             | 0.01  | 9.25  | 6.37E-01 | 6.76E-01 | pink |
| NUDT14 | 256281 | nudix (nucleoside diphosphate linked moiety X)-type motif 14 (NUDT14), mRNA.                                             | 0.29  | 8.20  | 2.16E-35 | 1.76E-34 | pink |
| NUP160 | 23279  | nucleoporin 160kDa (NUP160), mRNA.                                                                                       | 0.80  | 6.10  | 1.47E-78 | 1.22E-76 | pink |
| PAN3   | 255967 | PAN3 polyA specific ribonuclease subunit homolog ( <i>S. cerevisiae</i> ) (PAN3), mRNA.                                  | 0.25  | 8.17  | 5.98E-24 | 3.08E-23 | pink |
| PCNP   | 57092  | PEST proteolytic signal containing nuclear protein (PCNP), mRNA.                                                         | 0.01  | 7.34  | 6.96E-01 | 7.31E-01 | pink |

|        |        |                                                                                                                                                                      |       |       |          |          |      |
|--------|--------|----------------------------------------------------------------------------------------------------------------------------------------------------------------------|-------|-------|----------|----------|------|
| PCYT2  | 653414 | PREDICTED: similar to Ethanolamine-phosphate cytidyltransferase (Phosphorylethanolamine transferase) (CTP:phosphoethanolamine cytidyltransferase) (LOC653414), mRNA. | -0.74 | 9.32  | 1.15E-80 | 1.04E-78 | pink |
| PDLIM7 | 9260   | PDZ and LIM domain 7 (enigma) (PDLIM7), transcript variant 4, mRNA.                                                                                                  | -0.13 | 7.45  | 5.97E-19 | 2.43E-18 | pink |
| PECR   | 55825  | peroxisomal trans-2-enoyl-CoA reductase (PECR), mRNA.                                                                                                                | 0.00  | 5.96  | 9.20E-01 | 9.32E-01 | pink |
| PEX10  | 5192   | peroxisome biogenesis factor 10 (PEX10), transcript variant 1, mRNA.                                                                                                 | -0.03 | 9.71  | 4.85E-03 | 7.14E-03 | pink |
| PEX16  | 9409   | peroxisomal biogenesis factor 16 (PEX16), transcript variant 1, mRNA.                                                                                                | -0.14 | 6.71  | 4.96E-14 | 1.56E-13 | pink |
| PIGU   | 128869 | phosphatidylinositol glycan anchor biosynthesis, class U (PIGU), mRNA.                                                                                               | -0.09 | 10.11 | 2.76E-05 | 5.07E-05 | pink |
| PIN1   | 5300   | protein (peptidylprolyl cis/trans isomerase) NIMA-interacting 1 (PIN1), mRNA.                                                                                        | 0.03  | 5.47  | 5.66E-02 | 7.33E-02 | pink |
| PLD3   | 23646  | phospholipase D family, member 3 (PLD3), transcript variant 1, mRNA.                                                                                                 | 0.26  | 8.47  | 1.91E-38 | 1.81E-37 | pink |
| PPM1M  | 132160 | protein phosphatase 1M (PP2C domain containing) (PPM1M), mRNA.                                                                                                       | -0.33 | 8.46  | 9.03E-57 | 2.00E-55 | pink |

|         |        |                                                                               |       |       |          |          |      |
|---------|--------|-------------------------------------------------------------------------------|-------|-------|----------|----------|------|
| PPP1R35 | 221908 | chromosome 7 open reading frame 47 (C7orf47), mRNA.                           | 0.05  | 8.97  | 3.05E-05 | 5.58E-05 | pink |
| PROSER1 | 80209  | chromosome 13 open reading frame 23 (C13orf23), transcript variant 2, mRNA.   | 0.01  | 6.24  | 3.17E-01 | 3.61E-01 | pink |
| PRPSAP2 | 5636   | phosphoribosyl pyrophosphate synthetase-associated protein 2 (PRPSAP2), mRNA. | 0.00  | 10.44 | 8.76E-01 | 8.95E-01 | pink |
| PSMB10  | 5699   | proteasome (prosome, macropain) subunit, beta type, 10 (PSMB10), mRNA.        | -0.14 | 7.38  | 9.81E-23 | 4.78E-22 | pink |
| PSMB7   | 5695   | proteasome (prosome, macropain) subunit, beta type, 7 (PSMB7), mRNA.          | 0.00  | 8.75  | 9.24E-01 | 9.36E-01 | pink |
| RAD23B  | 5887   | RAD23 homolog B (S. cerevisiae) (RAD23B), mRNA.                               | -0.01 | 6.02  | 6.76E-01 | 7.12E-01 | pink |
| RANBP9  | 10048  | RAN binding protein 9 (RANBP9), mRNA.                                         | -0.01 | 9.44  | 4.37E-01 | 4.84E-01 | pink |
| RAP2A   | 5911   | RAP2A, member of RAS oncogene family (RAP2A), mRNA.                           | -0.19 | 8.26  | 5.04E-27 | 2.96E-26 | pink |
| RBM26   | 64062  | RNA binding motif protein 26 (RBM26), mRNA.                                   | 0.07  | 8.25  | 5.45E-05 | 9.71E-05 | pink |
| RDX     | 5962   | radixin (RDX), mRNA.                                                          | -0.09 | 9.22  | 1.06E-11 | 2.94E-11 | pink |
| RGS10   | 6001   | regulator of G-protein signalling 10 (RGS10), transcript variant 1, mRNA.     | -0.24 | 5.84  | 1.42E-36 | 1.23E-35 | pink |

|         |        |                                                                            |       |       |          |          |      |
|---------|--------|----------------------------------------------------------------------------|-------|-------|----------|----------|------|
| RHOC    | 389    | ras homolog gene family, member C (RHOC), transcript variant 3, mRNA.      | -0.19 | 10.19 | 3.31E-31 | 2.25E-30 | pink |
| RING1   | 6015   | ring finger protein 1 (RING1), mRNA.                                       | -0.31 | 8.44  | 1.24E-39 | 1.22E-38 | pink |
| RNF167  | 26001  | ring finger protein 167 (RNF167), mRNA.                                    | -0.02 | 5.50  | 3.11E-01 | 3.55E-01 | pink |
| RPUSD3  | 285367 | RNA pseudouridylate synthase domain containing 3 (RPUSD3), mRNA.           | -0.02 | 5.56  | 3.26E-01 | 3.71E-01 | pink |
| RRM1    | 6240   | ribonucleotide reductase M1 polypeptide (RRM1), mRNA.                      | -0.03 | 9.44  | 2.81E-02 | 3.77E-02 | pink |
| RRM2B   | 50484  | ribonucleotide reductase M2 B (TP53 inducible) (RRM2B), mRNA.              | 0.05  | 7.12  | 3.45E-04 | 5.72E-04 | pink |
| RRP1B   | 23076  | KIAA0179 (KIAA0179), mRNA.                                                 | 0.00  | 7.97  | 8.92E-01 | 9.09E-01 | pink |
| RRP36   | 88745  | chromosome 6 open reading frame 153 (C6orf153), mRNA.                      | 0.00  | 8.44  | 9.53E-01 | 9.60E-01 | pink |
| RRP8    | 23378  | KIAA0409 (KIAA0409), mRNA.                                                 | -0.04 | 8.55  | 1.02E-02 | 1.45E-02 | pink |
| SDHAF2  | 54949  | chromosome 11 open reading frame 79 (C11orf79), mRNA.                      | 0.08  | 6.06  | 3.83E-08 | 8.56E-08 | pink |
| SERTAD1 | 29950  | SERTA domain containing 1 (SERTAD1), mRNA.                                 | -0.02 | 7.40  | 2.95E-01 | 3.39E-01 | pink |
| SET     | 6418   | SET translocation (myeloid leukemia-associated) (SET), mRNA.               | -0.06 | 10.45 | 8.60E-05 | 1.51E-04 | pink |
| SF3A1   | 10291  | splicing factor 3a, subunit 1, 120kDa (SF3A1), transcript variant 2, mRNA. | -0.13 | 5.72  | 1.18E-15 | 4.05E-15 | pink |



|         |        |                                                                                                                    |       |      |          |          |      |
|---------|--------|--------------------------------------------------------------------------------------------------------------------|-------|------|----------|----------|------|
| SGOL2   | 151246 | shugoshin-like 2 (S. pombe) (SGOL2), mRNA.                                                                         | 0.06  | 7.97 | 2.71E-04 | 4.55E-04 | pink |
| SH3KBP1 | 30011  | SH3-domain kinase binding protein 1 (SH3KBP1), transcript variant 2, mRNA.                                         | 0.77  | 7.37 | 9.35E-83 | 9.69E-81 | pink |
| SKAP1   | 8631   | src kinase associated phosphoprotein 1 (SKAP1), transcript variant 1, mRNA.                                        | -0.07 | 5.47 | 7.96E-04 | 1.27E-03 | pink |
| SLC2A8  | 29988  | solute carrier family 2, (facilitated glucose transporter) member 8 (SLC2A8), mRNA.                                | 0.10  | 6.99 | 1.30E-07 | 2.82E-07 | pink |
| SLC41A3 | 54946  | solute carrier family 41, member 3 (SLC41A3), transcript variant 1, mRNA.                                          | -0.06 | 8.93 | 4.55E-05 | 8.15E-05 | pink |
| SMARCC1 | 6599   | SWI/SNF related, matrix associated, actin dependent regulator of chromatin, subfamily c, member 1 (SMARCC1), mRNA. | -0.11 | 8.47 | 1.26E-16 | 4.57E-16 | pink |
| SMC2    | 10592  | structural maintenance of chromosomes 2 (SMC2), transcript variant 2, mRNA.                                        | 0.05  | 7.07 | 4.56E-04 | 7.49E-04 | pink |
| SMC3    | 9126   | structural maintenance of chromosomes 3 (SMC3), mRNA.                                                              | 0.10  | 5.49 | 6.94E-09 | 1.63E-08 | pink |
| SNF8    | 11267  | SNF8, ESCRT-II complex subunit, homolog (S. cerevisiae) (SNF8), mRNA.                                              | -0.04 | 6.46 | 1.22E-02 | 1.73E-02 | pink |

|        |        |                                                                                            |       |       |          |          |      |
|--------|--------|--------------------------------------------------------------------------------------------|-------|-------|----------|----------|------|
| SPG11  | 80208  | KIAA1840 (KIAA1840), mRNA.                                                                 | -0.32 | 8.71  | 1.66E-41 | 1.78E-40 | pink |
| SRPK1  | 6732   | SFRS protein kinase 1 (SRPK1), mRNA.                                                       | 0.01  | 6.52  | 4.18E-01 | 4.64E-01 | pink |
| SRRM1  | 10250  | serine/arginine repetitive matrix 1 (SRRM1), mRNA.                                         | -0.16 | 6.21  | 1.66E-15 | 5.65E-15 | pink |
| SRXN1  | 140809 | sulfiredoxin 1 homolog (S. cerevisiae) (SRXN1), mRNA.                                      | 0.01  | 9.34  | 6.04E-01 | 6.46E-01 | pink |
| SSBP1  | 6742   | single-stranded DNA binding protein 1 (SSBP1), mRNA.                                       | 0.00  | 6.98  | 7.63E-01 | 7.92E-01 | pink |
| SSU72  | 29101  | SSU72 RNA polymerase II CTD phosphatase homolog (S. cerevisiae) (SSU72), mRNA.             | -0.24 | 6.70  | 1.30E-41 | 1.40E-40 | pink |
| STAU1  | 6780   | staufen, RNA binding protein, homolog 1 (Drosophila) (STAU1), transcript variant T4, mRNA. | -0.32 | 10.25 | 3.04E-61 | 9.03E-60 | pink |
| STRA13 | 201254 | stimulated by retinoic acid 13 homolog (mouse) (STRA13), mRNA.                             | -0.04 | 6.58  | 2.20E-02 | 3.00E-02 | pink |
| STRAP  | 11171  | serine/threonine kinase receptor associated protein (STRAP), mRNA.                         | 0.05  | 7.85  | 2.43E-06 | 4.83E-06 | pink |
| STX11  | 8676   | syntaxin 11 (STX11), mRNA.                                                                 | -0.09 | 7.53  | 1.78E-08 | 4.08E-08 | pink |
| SZRD1  | 26099  | chromosome 1 open reading frame 144 (C1orf144), mRNA.                                      | 0.10  | 7.86  | 5.33E-12 | 1.50E-11 | pink |
| TACO1  | 51204  | coiled-coil domain containing 44 (CCDC44), mRNA.                                           | 0.26  | 6.15  | 1.50E-21 | 6.88E-21 | pink |
| TARS   | 6897   | threonyl-tRNA synthetase (TARS), mRNA.                                                     | 0.32  | 7.38  | 1.82E-39 | 1.78E-38 | pink |

|          |        |                                                                                                   |       |      |          |          |      |
|----------|--------|---------------------------------------------------------------------------------------------------|-------|------|----------|----------|------|
| TBC1D22A | 25771  | TBC1 domain family, member 22A (TBC1D22A), mRNA.                                                  | -0.06 | 7.68 | 7.42E-05 | 1.31E-04 | pink |
| TCEAL3   | 85012  | transcription elongation factor A (SII)-like 3 (TCEAL3), transcript variant 2, mRNA.              | 0.06  | 8.62 | 5.33E-04 | 8.70E-04 | pink |
| TDRD7    | 23424  | tudor domain containing 7 (TDRD7), mRNA.                                                          | 0.19  | 7.07 | 5.57E-19 | 2.28E-18 | pink |
| THYN1    | 29087  | thymocyte nuclear protein 1 (THYN1), transcript variant 1, mRNA.                                  | -0.02 | 5.58 | 1.03E-01 | 1.28E-01 | pink |
| TIAL1    | 7073   | TIA1 cytotoxic granule-associated RNA binding protein-like 1 (TIAL1), transcript variant 2, mRNA. | -0.02 | 6.96 | 3.63E-01 | 4.09E-01 | pink |
| TIMM10   | 26519  | translocase of inner mitochondrial membrane 10 homolog (yeast) (TIMM10), mRNA.                    | 0.03  | 7.09 | 1.03E-02 | 1.46E-02 | pink |
| TINF2    | 26277  | TERF1 (TRF1)-interacting nuclear factor 2 (TINF2), mRNA.                                          | 0.14  | 7.68 | 1.27E-15 | 4.35E-15 | pink |
| TM9SF4   | 9777   | transmembrane 9 superfamily protein member 4 (TM9SF4), mRNA.                                      | 0.18  | 8.77 | 8.13E-30 | 5.24E-29 | pink |
| TMED1    | 11018  | transmembrane emp24 protein transport domain containing 1 (TMED1), mRNA.                          | 0.13  | 9.73 | 2.35E-17 | 8.81E-17 | pink |
| TMEM194A | 23306  | KIAA0286 protein (KIAA0286), mRNA.                                                                | -0.07 | 7.42 | 2.26E-07 | 4.81E-07 | pink |
| TMEM205  | 374882 | MBC3205 (UNQ501), mRNA.                                                                           | 0.08  | 6.87 | 1.91E-06 | 3.83E-06 | pink |

|         |        |                                                                               |       |      |          |          |      |
|---------|--------|-------------------------------------------------------------------------------|-------|------|----------|----------|------|
| TMEM209 | 84928  | hypothetical protein FLJ14803 (FLJ14803), mRNA.                               | -0.06 | 7.59 | 4.58E-04 | 7.53E-04 | pink |
| TMEM245 | 23731  | chromosome 9 open reading frame 5 (C9orf5), mRNA.                             | -0.02 | 6.93 | 1.90E-01 | 2.27E-01 | pink |
| TP53I3  | 9540   | tumor protein p53 inducible protein 3 (TP53I3), transcript variant 2, mRNA.   | -0.17 | 7.89 | 1.24E-24 | 6.63E-24 | pink |
| TPGS2   | 25941  | chromosome 18 open reading frame 10 (C18orf10), mRNA.                         | 0.26  | 7.02 | 8.38E-33 | 6.14E-32 | pink |
| TRAPPC3 | 27095  | trafficking protein particle complex 3 (TRAPPC3), mRNA.                       | 0.05  | 8.95 | 8.59E-04 | 1.37E-03 | pink |
| TSPAN17 | 26262  | tetraspanin 17 (TSPAN17), transcript variant 1, mRNA.                         | 0.03  | 7.35 | 7.00E-02 | 8.96E-02 | pink |
| TSSC4   | 10078  | tumor suppressing subtransferable candidate 4 (TSSC4), mRNA.                  | -0.01 | 5.49 | 5.35E-01 | 5.80E-01 | pink |
| TTC14   | 151613 | tetratricopeptide repeat domain 14 (TTC14), transcript variant 2, mRNA.       | -0.13 | 7.05 | 9.13E-16 | 3.15E-15 | pink |
| TTC3    | 7267   | tetratricopeptide repeat domain 3 (TTC3), transcript variant 2, mRNA.         | -0.06 | 8.59 | 8.71E-07 | 1.78E-06 | pink |
| TYMS    | 7298   | thymidylate synthetase (TYMS), mRNA.                                          | -0.01 | 8.15 | 6.31E-01 | 6.70E-01 | pink |
| UBE2M   | 9040   | ubiquitin-conjugating enzyme E2M (UBC12 homolog, yeast) (UBE2M), mRNA.        | -0.14 | 7.87 | 4.08E-14 | 1.29E-13 | pink |
| UBR7    | 55148  | chromosome 14 open reading frame 130 (C14orf130), transcript variant 1, mRNA. | 0.21  | 9.42 | 2.26E-37 | 2.03E-36 | pink |

|        |        |                                                                                                      |       |       |          |          |      |
|--------|--------|------------------------------------------------------------------------------------------------------|-------|-------|----------|----------|------|
| UHMK1  | 127933 | U2AF homology motif (UHM) kinase 1 (UHMK1), mRNA.                                                    | 0.12  | 10.44 | 1.04E-13 | 3.20E-13 | pink |
| UROS   | 7390   | uroporphyrinogen III synthase (congenital erythropoietic porphyria) (UROS), mRNA.                    | 0.02  | 6.11  | 3.71E-01 | 4.16E-01 | pink |
| USP13  | 8975   | ubiquitin specific peptidase 13 (isopeptidase T-3) (USP13), mRNA.                                    | 0.09  | 6.16  | 6.91E-12 | 1.93E-11 | pink |
| USP14  | 9097   | ubiquitin specific peptidase 14 (tRNA-guanine transglycosylase) (USP14), transcript variant 1, mRNA. | 0.01  | 7.47  | 6.54E-01 | 6.92E-01 | pink |
| VDAC1  | 7416   | voltage-dependent anion channel 1 (VDAC1), mRNA.                                                     | -0.03 | 9.81  | 4.60E-02 | 6.03E-02 | pink |
| WDR54  | 84058  | WD repeat domain 54 (WDR54), mRNA.                                                                   | -0.36 | 7.86  | 1.96E-55 | 4.02E-54 | pink |
| XPC    | 7508   | xeroderma pigmentosum, complementation group C (XPC), mRNA.                                          | 0.01  | 6.92  | 2.32E-01 | 2.72E-01 | pink |
| XXYLT1 | 152002 | chromosome 3 open reading frame 21 (C3orf21), mRNA.                                                  | -0.21 | 9.34  | 7.41E-34 | 5.62E-33 | pink |
| YIF1A  | 10897  | Yip1 interacting factor homolog A (S. cerevisiae) (YIF1A), mRNA.                                     | 0.11  | 8.95  | 1.91E-10 | 4.93E-10 | pink |
| YTHDC1 | 91746  | YTH domain containing 1 (YTHDC1), transcript variant 2, mRNA.                                        | 0.10  | 8.40  | 5.65E-12 | 1.59E-11 | pink |
| YTHDF2 | 51441  | YTH domain family, member 2 (YTHDF2), mRNA.                                                          | 0.07  | 6.59  | 1.82E-06 | 3.63E-06 | pink |

|         |        |                                                                                                                               |       |       |          |          |        |
|---------|--------|-------------------------------------------------------------------------------------------------------------------------------|-------|-------|----------|----------|--------|
| YWHAB   | 7529   | tyrosine 3-monooxygenase/tryptophan 5-monooxygenase activation protein, beta polypeptide (YWHAB), transcript variant 2, mRNA. | -0.12 | 7.26  | 9.96E-17 | 3.64E-16 | pink   |
| ZFAND2A | 90637  | zinc finger, AN1-type domain 2A (ZFAND2A), mRNA.                                                                              | 0.15  | 7.53  | 1.27E-16 | 4.61E-16 | pink   |
| ZNF511  | 118472 | zinc finger protein 511 (ZNF511), mRNA.                                                                                       | 0.01  | 7.51  | 4.51E-01 | 4.98E-01 | pink   |
| ZNF558  | 148156 | zinc finger protein 558 (ZNF558), mRNA.                                                                                       | -0.05 | 9.18  | 1.23E-02 | 1.74E-02 | pink   |
| ZNF593  | 51042  | zinc finger protein 593 (ZNF593), mRNA.                                                                                       | 0.11  | 8.12  | 2.80E-13 | 8.46E-13 | pink   |
| ZNF653  | 115950 | zinc finger protein 653 (ZNF653), mRNA.                                                                                       | -0.14 | 7.38  | 5.38E-16 | 1.88E-15 | pink   |
| ZNF700  | 90592  | zinc finger protein 700 (ZNF700), mRNA.                                                                                       | -0.01 | 7.89  | 6.70E-01 | 7.07E-01 | pink   |
| ZNF787  | 126208 | zinc finger protein 787 (ZNF787), mRNA.                                                                                       | 0.02  | 7.95  | 2.39E-01 | 2.79E-01 | pink   |
| A4GALT  | 53947  | alpha 1,4-galactosyltransferase (globotriaosylceramide synthase) (A4GALT), mRNA.                                              | -0.07 | 9.02  | 8.99E-06 | 1.72E-05 | purple |
| ACSM3   | 6296   | acyl-CoA synthetase medium-chain family member 3 (ACSM3), transcript variant 1, mRNA.                                         | 0.03  | 12.30 | 2.70E-02 | 3.65E-02 | purple |
| ADIRF   | 10974  | chromosome 10 open reading frame 116 (C10orf116), mRNA.                                                                       | -0.19 | 8.36  | 1.26E-24 | 6.76E-24 | purple |

|          |        |                                                                                                                |       |       |          |          |        |
|----------|--------|----------------------------------------------------------------------------------------------------------------|-------|-------|----------|----------|--------|
| AK4      | 205    | adenylate kinase 3-like 1 (AK3L1), nuclear gene encoding mitochondrial protein, transcript variant 7, mRNA.    | -0.04 | 8.28  | 8.98E-03 | 1.29E-02 | purple |
| ALPL     | 249    | alkaline phosphatase, liver/bone/kidney (ALPL), mRNA.                                                          | 0.13  | 7.53  | 5.74E-14 | 1.80E-13 | purple |
| AMICA1   | 120425 | adhesion molecule, interacts with CXADR antigen 1 (AMICA1), mRNA.                                              | -0.05 | 10.35 | 1.00E-04 | 1.75E-04 | purple |
| ANKRD13A | 88455  | ankyrin repeat domain 13A (ANKRD13A), mRNA.                                                                    | -0.13 | 6.96  | 4.64E-19 | 1.90E-18 | purple |
| ANO10    | 55129  | transmembrane protein 16K (TMEM16K), mRNA.                                                                     | -0.03 | 9.58  | 1.34E-02 | 1.88E-02 | purple |
| ANXA11   | 311    | annexin A11 (ANXA11), transcript variant b, mRNA.                                                              | -0.15 | 7.28  | 1.67E-21 | 7.65E-21 | purple |
| ARHGAP10 | 79658  | Rho GTPase activating protein 10 (ARHGAP10), mRNA.                                                             | 0.05  | 7.53  | 1.28E-05 | 2.41E-05 | purple |
| ARHGAP24 | 83478  | Rho GTPase activating protein 24 (ARHGAP24), transcript variant 2, mRNA.                                       | -0.01 | 6.06  | 5.06E-01 | 5.51E-01 | purple |
| ARPC1A   | 10552  | actin related protein 2/3 complex, subunit 1A, 41kDa (ARPC1A), mRNA.                                           | -0.06 | 7.62  | 3.75E-03 | 5.59E-03 | purple |
| ASRGL1   | 80150  | asparaginase like 1 (ASRGL1), mRNA.                                                                            | 0.00  | 10.41 | 7.87E-01 | 8.15E-01 | purple |
| ATP1B1   | 481    | ATPase, Na <sup>+</sup> /K <sup>+</sup> transporting, beta 1 polypeptide (ATP1B1), transcript variant 1, mRNA. | 0.57  | 9.58  | 4.93E-56 | 1.04E-54 | purple |

|          |        |                                                                                          |       |      |          |          |        |
|----------|--------|------------------------------------------------------------------------------------------|-------|------|----------|----------|--------|
| BAIAP2L1 | 55971  | BAI1-associated protein 2-like 1 (BAIAP2L1), mRNA.                                       | -0.09 | 6.65 | 3.66E-13 | 1.10E-12 | purple |
| BCAR1    | 9564   | breast cancer anti-estrogen resistance 1 (BCAR1), mRNA.                                  | -0.36 | 6.77 | 1.10E-31 | 7.65E-31 | purple |
| BHLHE22  | 27319  | basic helix-loop-helix domain containing, class B, 5 (BHLHB5), mRNA.                     | -0.10 | 9.31 | 7.22E-15 | 2.37E-14 | purple |
| BMPR1A   | 283155 | PREDICTED: hypothetical LOC283155 (LOC283155), mRNA.                                     | -0.10 | 7.60 | 3.50E-12 | 9.95E-12 | purple |
| C1orf106 | 55765  | chromosome 1 open reading frame 106 (C1orf106), mRNA.                                    | -0.10 | 8.31 | 4.28E-10 | 1.08E-09 | purple |
| C2orf88  | 84281  | hypothetical protein MGC13057 (MGC13057), transcript variant 2, mRNA.                    | 0.01  | 8.73 | 7.70E-01 | 7.99E-01 | purple |
| C3orf14  | 57415  | chromosome 3 open reading frame 14 (C3orf14), mRNA.                                      | 0.04  | 8.29 | 6.14E-03 | 8.95E-03 | purple |
| CACNB4   | 785    | calcium channel, voltage-dependent, beta 4 subunit (CACNB4), transcript variant 1, mRNA. | 0.23  | 6.32 | 4.61E-31 | 3.10E-30 | purple |
| CASK     | 8573   | calcium/calmodulin-dependent serine protein kinase (MAGUK family) (CASK), mRNA.          | 1.14  | 6.37 | 1.17E-68 | 4.89E-67 | purple |
| CCDC126  | 90693  | coiled-coil domain containing 126 (CCDC126), mRNA.                                       | 0.07  | 9.25 | 7.75E-04 | 1.24E-03 | purple |
| CCDC64   | 92558  | coiled-coil domain containing 64 (CCDC64), mRNA.                                         | 0.02  | 6.56 | 3.89E-01 | 4.34E-01 | purple |



|          |       |                                                                       |       |      |          |          |        |
|----------|-------|-----------------------------------------------------------------------|-------|------|----------|----------|--------|
| CCND2    | 894   | cyclin D2 (CCND2), mRNA.                                              | 0.28  | 8.52 | 4.64E-38 | 4.34E-37 | purple |
| CD82     | 3732  | CD82 molecule (CD82), transcript variant 1, mRNA.                     | -0.47 | 8.94 | 2.21E-58 | 5.49E-57 | purple |
| CD9      | 928   | CD9 molecule (CD9), mRNA.                                             | -0.20 | 7.31 | 6.31E-25 | 3.41E-24 | purple |
| CDC42EP4 | 23580 | CDC42 effector protein (Rho GTPase binding) 4 (CDC42EP4), mRNA.       | 0.05  | 5.81 | 1.59E-04 | 2.72E-04 | purple |
| CDH2     | 1000  | cadherin 2, type 1, N-cadherin (neuronal) (CDH2), mRNA.               | 0.02  | 9.33 | 8.23E-02 | 1.04E-01 | purple |
| CDK2AP1  | 8099  | CDK2-associated protein 1 (CDK2AP1), mRNA.                            | 0.04  | 6.18 | 2.71E-02 | 3.65E-02 | purple |
| CEBPB    | 1051  | CCAAT/enhancer binding protein (C/EBP), beta (CEBPB), mRNA.           | -0.18 | 5.41 | 2.33E-17 | 8.75E-17 | purple |
| CHDH     | 55349 | choline dehydrogenase (CHDH), mRNA.                                   | 0.01  | 5.54 | 6.46E-01 | 6.84E-01 | purple |
| COL5A1   | 1289  | collagen, type V, alpha 1 (COL5A1), mRNA.                             | -0.12 | 8.27 | 2.62E-12 | 7.50E-12 | purple |
| CPXM1    | 56265 | carboxypeptidase X (M14 family), member 1 (CPXM1), mRNA.              | -0.10 | 6.64 | 8.26E-11 | 2.17E-10 | purple |
| CRYL1    | 51084 | crystallin, lambda 1 (CRYL1), mRNA.                                   | 0.10  | 8.54 | 5.18E-10 | 1.30E-09 | purple |
| CRYM     | 1428  | crystallin, mu (CRYM), transcript variant 2, mRNA.                    | 0.03  | 8.41 | 8.27E-02 | 1.05E-01 | purple |
| CSRP2    | 1466  | cysteine and glycine-rich protein 2 (CSRP2), mRNA.                    | -0.36 | 7.15 | 4.88E-49 | 7.41E-48 | purple |
| CST3     | 1471  | cystatin C (amyloid angiopathy and cerebral hemorrhage) (CST3), mRNA. | 0.01  | 7.81 | 4.51E-01 | 4.97E-01 | purple |

|         |       |                                                                                                      |       |       |          |          |        |
|---------|-------|------------------------------------------------------------------------------------------------------|-------|-------|----------|----------|--------|
| CTNNA2  | 1496  | catenin (cadherin-associated protein), alpha 2 (CTNNA2), mRNA.                                       | 0.02  | 5.99  | 3.64E-01 | 4.10E-01 | purple |
| DAAM2   | 23500 | dishevelled associated activator of morphogenesis 2 (DAAM2), mRNA.                                   | -0.05 | 8.50  | 1.05E-03 | 1.66E-03 | purple |
| DACT1   | 51339 | dapper, antagonist of beta-catenin, homolog 1 (Xenopus laevis) (DACT1), transcript variant 2, mRNA.  | -0.01 | 10.29 | 4.24E-01 | 4.70E-01 | purple |
| DBNDD1  | 79007 | dysbindin (dystrobrevin binding protein 1) domain containing 1 (DBNDD1), transcript variant 2, mRNA. | -0.06 | 5.83  | 2.50E-03 | 3.79E-03 | purple |
| DLL1    | 28514 | delta-like 1 (Drosophila) (DLL1), mRNA.                                                              | -0.07 | 9.41  | 1.05E-04 | 1.82E-04 | purple |
| DNAJC12 | 56521 | DnaJ (Hsp40) homolog, subfamily C, member 12 (DNAJC12), transcript variant 2, mRNA.                  | 0.16  | 7.71  | 6.64E-20 | 2.82E-19 | purple |
| EOMES   | 8320  | eomesodermin homolog (Xenopus laevis) (EOMES), mRNA.                                                 | 0.05  | 6.91  | 4.23E-03 | 6.27E-03 | purple |
| EPB41L5 | 57669 | erythrocyte membrane protein band 4.1 like 5 (EPB41L5), mRNA.                                        | 0.04  | 12.00 | 2.46E-02 | 3.34E-02 | purple |
| EPDR1   | 54749 | ependymin related protein 1 (zebrafish) (EPDR1), mRNA.                                               | 0.35  | 6.79  | 1.86E-28 | 1.15E-27 | purple |
| EPHB1   | 2047  | EPH receptor B1 (EPHB1), mRNA.                                                                       | -0.14 | 8.27  | 1.24E-17 | 4.74E-17 | purple |

|            |       |                                                                  |       |      |          |          |        |
|------------|-------|------------------------------------------------------------------|-------|------|----------|----------|--------|
| ETV5       | 2119  | ets variant gene 5 (ets-related molecule) (ETV5), mRNA.          | 0.06  | 8.42 | 3.91E-05 | 7.06E-05 | purple |
| F12        | 2161  | coagulation factor XII (Hageman factor) (F12), mRNA.             | -0.23 | 6.20 | 1.10E-32 | 8.04E-32 | purple |
| FAM46A     | 55603 | family with sequence similarity 46, member A (FAM46A), mRNA.     | 0.08  | 6.11 | 5.38E-05 | 9.59E-05 | purple |
| FGGY       | 55277 | hypothetical protein FLJ10986 (FLJ10986), mRNA.                  | -0.06 | 6.03 | 2.09E-05 | 3.87E-05 | purple |
| FJX1       | 24147 | four jointed box 1 (Drosophila) (FJX1), mRNA.                    | -0.09 | 8.28 | 2.39E-04 | 4.03E-04 | purple |
| FOXA3      | 3171  | forkhead box A3 (FOXA3), mRNA.                                   | 0.01  | 7.74 | 5.76E-01 | 6.19E-01 | purple |
| GABARAP L1 | 23710 | GABA(A) receptor-associated protein like 1 (GABARAPL1), mRNA.    | 0.30  | 6.53 | 2.30E-37 | 2.07E-36 | purple |
| GADD45A    | 1647  | growth arrest and DNA-damage-inducible, alpha (GADD45A), mRNA.   | -0.10 | 8.35 | 7.13E-17 | 2.62E-16 | purple |
| GAS2       | 2620  | growth arrest-specific 2 (GAS2), transcript variant 2, mRNA.     | -0.01 | 9.70 | 5.94E-01 | 6.36E-01 | purple |
| GCHFR      | 2644  | GTP cyclohydrolase I feedback regulator (GCHFR), mRNA.           | -0.17 | 8.60 | 1.41E-16 | 5.08E-16 | purple |
| GCNT3      | 9245  | glucosaminyl (N-acetyl) transferase 3, mucin type (GCNT3), mRNA. | -0.10 | 5.83 | 8.33E-11 | 2.19E-10 | purple |
| GPC4       | 2239  | glypican 4 (GPC4), mRNA.                                         | -0.02 | 8.22 | 2.14E-01 | 2.53E-01 | purple |

|        |        |                                                                                                            |       |       |          |          |        |
|--------|--------|------------------------------------------------------------------------------------------------------------|-------|-------|----------|----------|--------|
| GRHPR  | 9380   | glyoxylate reductase/hydroxypyruvate reductase (GRHPR), mRNA.                                              | 0.29  | 6.60  | 9.42E-42 | 1.03E-40 | purple |
| GRM8   | 2918   | glutamate receptor, metabotropic 8 (GRM8), mRNA.                                                           | -0.07 | 9.47  | 1.24E-06 | 2.50E-06 | purple |
| GSTM4  | 2948   | glutathione S-transferase M4 (GSTM4), transcript variant 1, mRNA.                                          | 0.06  | 6.50  | 1.22E-03 | 1.91E-03 | purple |
| HACD1  | 9200   | protein tyrosine phosphatase-like (proline instead of catalytic arginine), member A (PTPLA), mRNA.         | 0.08  | 9.83  | 2.22E-07 | 4.74E-07 | purple |
| HBD    | 3045   | hemoglobin, delta (HBD), mRNA.                                                                             | 0.00  | 6.43  | 9.83E-01 | 9.86E-01 | purple |
| HES5   | 388585 | hairy and enhancer of split 5 (Drosophila) (HES5), mRNA.                                                   | 0.01  | 5.87  | 3.11E-01 | 3.56E-01 | purple |
| HEY1   | 23462  | hairy/enhancer-of-split related with YRPW motif 1 (HEY1), transcript variant 1, mRNA.                      | 0.03  | 8.23  | 1.87E-01 | 2.23E-01 | purple |
| HNFB1B | 6928   | transcription factor 2, hepatic; LF-B3; variant hepatic nuclear factor (TCF2), transcript variant a, mRNA. | -0.04 | 7.84  | 7.52E-02 | 9.58E-02 | purple |
| HOOK1  | 51361  | hook homolog 1 (Drosophila) (HOOK1), mRNA.                                                                 | 0.04  | 7.79  | 6.96E-05 | 1.23E-04 | purple |
| HOXB2  | 3212   | homeobox B2 (HOXB2), mRNA.                                                                                 | -0.01 | 8.47  | 7.88E-01 | 8.15E-01 | purple |
| HOXB4  | 3214   | homeobox B4 (HOXB4), mRNA.                                                                                 | 0.02  | 10.34 | 5.79E-02 | 7.49E-02 | purple |
| HOXB7  | 3217   | homeobox B7 (HOXB7), mRNA.                                                                                 | -0.12 | 7.51  | 8.01E-14 | 2.49E-13 | purple |
| HRSP12 | 10247  | heat-responsive protein 12 (HRSP12), mRNA.                                                                 | 0.00  | 7.81  | 6.79E-01 | 7.14E-01 | purple |

|           |       |                                                                                                  |       |       |          |          |        |
|-----------|-------|--------------------------------------------------------------------------------------------------|-------|-------|----------|----------|--------|
| HVCN1     | 84329 | hydrogen voltage-gated channel 1 (HVCN1), transcript variant 1, mRNA.                            | 0.00  | 5.86  | 9.66E-01 | 9.72E-01 | purple |
| IL17RB    | 55540 | interleukin 17 receptor B (IL17RB), mRNA.                                                        | 0.04  | 6.61  | 1.48E-02 | 2.06E-02 | purple |
| INPP5A    | 3632  | inositol polyphosphate-5-phosphatase, 40kDa (INPP5A), mRNA.                                      | 0.05  | 7.82  | 9.39E-06 | 1.79E-05 | purple |
| IPCEF1    | 26034 | phosphoinositide-binding protein PIP3-E (PIP3-E), mRNA.                                          | -0.01 | 12.31 | 3.61E-01 | 4.06E-01 | purple |
| KIAA0226L | 80183 | chromosome 13 open reading frame 18 (C13orf18), mRNA.                                            | 0.03  | 9.08  | 3.84E-02 | 5.08E-02 | purple |
| LAD1      | 3898  | ladinin 1 (LAD1), mRNA.                                                                          | 0.02  | 10.09 | 1.15E-01 | 1.43E-01 | purple |
| LFNG      | 3955  | LFNG O-fucosylpeptide 3-beta-N-acetylglucosaminyltransferase (LFNG), transcript variant 1, mRNA. | -0.22 | 9.00  | 1.36E-44 | 1.69E-43 | purple |
| LGALS14   | 56891 | lectin, galactoside-binding, soluble, 14 (LGALS14), transcript variant 2, mRNA.                  | -0.14 | 9.74  | 3.09E-15 | 1.03E-14 | purple |
| LGALS3BP  | 3959  | lectin, galactoside-binding, soluble, 3 binding protein (LGALS3BP), mRNA.                        | -0.46 | 7.48  | 3.99E-73 | 2.06E-71 | purple |
| LIN7A     | 8825  | lin-7 homolog A (C. elegans) (LIN7A), mRNA.                                                      | 0.00  | 10.28 | 6.34E-01 | 6.73E-01 | purple |
| LMO3      | 55885 | LIM domain only 3 (rhombotin-like 2) (LMO3), transcript variant 2, mRNA.                         | 0.00  | 6.71  | 9.03E-01 | 9.19E-01 | purple |

|       |       |                                                                                                     |       |       |          |          |        |
|-------|-------|-----------------------------------------------------------------------------------------------------|-------|-------|----------|----------|--------|
| MAP1B | 4131  | microtubule-associated protein 1B (MAP1B), transcript variant 1, mRNA.                              | 0.05  | 10.23 | 7.38E-04 | 1.18E-03 | purple |
| MBD4  | 8930  | methyl-CpG binding domain protein 4 (MBD4), mRNA.                                                   | 0.10  | 10.06 | 1.23E-11 | 3.38E-11 | purple |
| MDK   | 4192  | midkine (neurite growth-promoting factor 2) (MDK), transcript variant 2, mRNA.                      | -0.15 | 10.50 | 2.93E-19 | 1.21E-18 | purple |
| MEF2C | 4208  | MADS box transcription enhancer factor 2, polypeptide C (myocyte enhancer factor 2C) (MEF2C), mRNA. | 0.06  | 8.03  | 9.27E-05 | 1.62E-04 | purple |
| MGST3 | 4259  | microsomal glutathione S-transferase 3 (MGST3), mRNA.                                               | 0.06  | 10.45 | 9.15E-04 | 1.46E-03 | purple |
| MMP7  | 4316  | matrix metalloproteinase 7 (matrilysin, uterine) (MMP7), mRNA.                                      | -0.15 | 8.79  | 2.21E-21 | 1.00E-20 | purple |
| MNX1  | 3110  | homeobox HB9 (HLXB9), mRNA.                                                                         | 0.08  | 6.67  | 2.00E-06 | 4.00E-06 | purple |
| MPC2  | 25874 | brain protein 44 (BRP44), mRNA.                                                                     | -0.06 | 7.30  | 6.51E-07 | 1.34E-06 | purple |
| MPP1  | 4354  | membrane protein, palmitoylated 1, 55kDa (MPP1), mRNA.                                              | 0.07  | 9.24  | 5.20E-06 | 1.01E-05 | purple |
| MSRB1 | 51734 | selenoprotein X, 1 (SEPX1), mRNA.                                                                   | -0.09 | 7.64  | 1.04E-08 | 2.41E-08 | purple |
| MT1G  | 4495  | metallothionein 1G (MT1G), mRNA.                                                                    | -0.09 | 6.89  | 9.18E-10 | 2.27E-09 | purple |
| MUC13 | 56667 | mucin 13, cell surface associated (MUC13), mRNA.                                                    | 1.61  | 9.14  | 7.38E-93 | 1.97E-90 | purple |
| MYH10 | 4628  | myosin, heavy chain 10, non-muscle (MYH10), mRNA.                                                   | 0.00  | 8.84  | 9.65E-01 | 9.70E-01 | purple |
| MYO6  | 4646  | myosin VI (MYO6), mRNA.                                                                             | 0.08  | 9.01  | 4.28E-07 | 8.94E-07 | purple |

|        |        |                                                                           |       |       |          |          |        |
|--------|--------|---------------------------------------------------------------------------|-------|-------|----------|----------|--------|
| NA     | 26872  | six transmembrane epithelial antigen of the prostate 1 (STEAP1), mRNA.    | -0.35 | 7.00  | 6.35E-44 | 7.63E-43 | purple |
| NA     | 441519 | cancer/testis antigen CT45-3 (CT45-3), mRNA.                              | 0.22  | 8.26  | 1.50E-31 | 1.04E-30 | purple |
| NA     | 388325 | DTFT5783 (UNQ5783), mRNA.                                                 | -0.16 | 7.65  | 5.01E-23 | 2.47E-22 | purple |
| NA     | 140851 | chromosome 20 open reading frame 127 (C20orf127), mRNA.                   | 0.07  | 7.77  | 1.50E-06 | 3.02E-06 | purple |
| NA     | 29970  | schwannomin interacting protein 1 (SCHIP1), mRNA.                         | -0.03 | 10.88 | 3.09E-01 | 3.54E-01 | purple |
| NREP   | 9315   | chromosome 5 open reading frame 13 (C5orf13), mRNA.                       | -0.20 | 5.72  | 2.51E-24 | 1.31E-23 | purple |
| NRGN   | 4900   | neurogranin (protein kinase C substrate, RC3) (NRGN), mRNA.               | -0.10 | 7.48  | 1.65E-12 | 4.78E-12 | purple |
| NRIP1  | 8204   | nuclear receptor interacting protein 1 (NRIP1), mRNA.                     | 0.11  | 5.65  | 6.29E-09 | 1.49E-08 | purple |
| NT5C3B | 115024 | 5'-nucleotidase, cytosolic III-like (NT5C3L), mRNA.                       | -0.05 | 11.11 | 6.31E-04 | 1.02E-03 | purple |
| NUMB   | 8650   | numb homolog (Drosophila) (NUMB), transcript variant 1, mRNA.             | 0.09  | 7.70  | 1.20E-12 | 3.51E-12 | purple |
| PARD6G | 84552  | par-6 partitioning defective 6 homolog gamma (C. elegans) (PARD6G), mRNA. | 0.41  | 5.46  | 3.38E-30 | 2.20E-29 | purple |

|         |        |                                                                                                                           |       |       |          |          |        |
|---------|--------|---------------------------------------------------------------------------------------------------------------------------|-------|-------|----------|----------|--------|
| PCBD1   | 5092   | pterin-4 alpha-carbinolamine dehydratase/dimerization cofactor of hepatocyte nuclear factor 1 alpha (TCF1) (PCBD1), mRNA. | 0.03  | 10.22 | 1.59E-01 | 1.92E-01 | purple |
| PHLDA1  | 22822  | pleckstrin homology-like domain, family A, member 1 (PHLDA1), mRNA.                                                       | -0.18 | 7.70  | 4.25E-20 | 1.83E-19 | purple |
| PLA1A   | 51365  | phospholipase A1 member A (PLA1A), mRNA.                                                                                  | -0.02 | 9.02  | 2.66E-01 | 3.09E-01 | purple |
| PLCL2   | 23228  | phospholipase C-like 2 (PLCL2), mRNA.                                                                                     | -0.06 | 8.30  | 1.74E-05 | 3.24E-05 | purple |
| PLOD2   | 5352   | procollagen-lysine, 2-oxoglutarate 5-dioxygenase 2 (PLOD2), transcript variant 1, mRNA.                                   | -0.03 | 7.36  | 2.82E-02 | 3.78E-02 | purple |
| PMEPA1  | 56937  | transmembrane, prostate androgen induced RNA (TMEPAI), transcript variant 4, mRNA.                                        | -0.08 | 7.44  | 6.64E-06 | 1.28E-05 | purple |
| PPIC    | 5480   | peptidylprolyl isomerase C (cyclophilin C) (PPIC), mRNA.                                                                  | 0.29  | 7.70  | 3.43E-36 | 2.92E-35 | purple |
| PRKCDBP | 112464 | protein kinase C, delta binding protein (PRKCDBP), mRNA.                                                                  | -0.01 | 9.91  | 2.80E-01 | 3.23E-01 | purple |
| RAB27A  | 5873   | RAB27A, member RAS oncogene family (RAB27A), transcript variant 3, mRNA.                                                  | -0.27 | 9.97  | 2.72E-40 | 2.77E-39 | purple |
| RAB31   | 11031  | RAB31, member RAS oncogene family (RAB31), mRNA.                                                                          | -0.23 | 8.15  | 2.74E-49 | 4.21E-48 | purple |



|         |        |                                                                             |       |       |          |          |        |
|---------|--------|-----------------------------------------------------------------------------|-------|-------|----------|----------|--------|
| RAB38   | 23682  | RAB38, member RAS oncogene family (RAB38), mRNA.                            | -0.16 | 7.91  | 1.26E-20 | 5.56E-20 | purple |
| RAB40B  | 10966  | RAB40B, member RAS oncogene family (RAB40B), mRNA.                          | -0.13 | 8.20  | 3.52E-21 | 1.59E-20 | purple |
| RASGRP1 | 10125  | RAS guanyl releasing protein 1 (calcium and DAG-regulated) (RASGRP1), mRNA. | -0.03 | 7.69  | 1.81E-02 | 2.49E-02 | purple |
| RBPM2   | 348093 | RNA binding protein with multiple splicing 2 (RBPM2), mRNA.                 | -0.01 | 7.37  | 7.12E-01 | 7.46E-01 | purple |
| RENBP   | 5973   | renin binding protein (RENBP), mRNA.                                        | -0.02 | 6.25  | 9.23E-02 | 1.16E-01 | purple |
| RHOU    | 58480  | ras homolog gene family, member U (RHOU), mRNA.                             | 0.07  | 8.97  | 4.61E-04 | 7.56E-04 | purple |
| RIMS3   | 9783   | regulating synaptic membrane exocytosis 3 (RIMS3), mRNA.                    | 0.06  | 10.39 | 8.75E-05 | 1.53E-04 | purple |
| RTKN    | 6242   | rhotekin (RTKN), transcript variant 1, mRNA.                                | -0.15 | 9.18  | 2.16E-24 | 1.14E-23 | purple |
| S100A4  | 6275   | S100 calcium binding protein A4 (S100A4), transcript variant 1, mRNA.       | 0.14  | 6.65  | 4.98E-22 | 2.33E-21 | purple |
| S100A6  | 6277   | S100 calcium binding protein A6 (S100A6), mRNA.                             | 0.14  | 8.29  | 3.18E-10 | 8.08E-10 | purple |
| SASH1   | 23328  | SAM and SH3 domain containing 1 (SASH1), mRNA.                              | 0.12  | 9.64  | 1.26E-10 | 3.27E-10 | purple |
| SCPEP1  | 59342  | serine carboxypeptidase 1 (SCPEP1), mRNA.                                   | 0.04  | 8.93  | 1.46E-02 | 2.04E-02 | purple |
| SDC4    | 6385   | syndecan 4 (SDC4), mRNA.                                                    | -0.24 | 7.15  | 4.80E-40 | 4.82E-39 | purple |

|          |       |                                                                                                                 |       |       |          |          |        |
|----------|-------|-----------------------------------------------------------------------------------------------------------------|-------|-------|----------|----------|--------|
| SERPINE2 | 5270  | serpin peptidase inhibitor, clade E (nexin, plasminogen activator inhibitor type 1), member 2 (SERPINE2), mRNA. | 0.51  | 7.33  | 1.10E-63 | 3.76E-62 | purple |
| SGPP1    | 81537 | sphingosine-1-phosphate phosphatase 1 (SGPP1), mRNA.                                                            | -0.08 | 9.60  | 2.77E-05 | 5.08E-05 | purple |
| SH2D2A   | 9047  | SH2 domain protein 2A (SH2D2A), mRNA.                                                                           | -0.04 | 7.07  | 1.27E-02 | 1.78E-02 | purple |
| SIT1     | 27240 | signaling threshold regulating transmembrane adaptor 1 (SIT1), mRNA.                                            | 0.02  | 6.31  | 1.91E-01 | 2.27E-01 | purple |
| SNX10    | 29887 | sorting nexin 10 (SNX10), mRNA.                                                                                 | 0.02  | 10.60 | 1.62E-01 | 1.96E-01 | purple |
| SORL1    | 6653  | sortilin-related receptor, L(DLR class) A repeats-containing (SORL1), mRNA.                                     | -0.05 | 7.84  | 3.73E-03 | 5.56E-03 | purple |
| SPRY2    | 10253 | sprouty homolog 2 (Drosophila) (SPRY2), mRNA.                                                                   | 0.05  | 8.76  | 4.70E-03 | 6.93E-03 | purple |
| SSBP2    | 23635 | single-stranded DNA binding protein 2 (SSBP2), mRNA.                                                            | -0.13 | 6.24  | 6.48E-11 | 1.72E-10 | purple |
| ST8SIA5  | 29906 | ST8 alpha-N-acetylneuraminide alpha-2,8-sialyltransferase 5 (ST8SIA5), mRNA.                                    | 0.05  | 10.53 | 1.08E-05 | 2.05E-05 | purple |
| STARD5   | 80765 | START domain containing 5 (STARD5), mRNA.                                                                       | 0.02  | 7.13  | 1.36E-01 | 1.66E-01 | purple |
| STC2     | 8614  | stanniocalcin 2 (STC2), mRNA.                                                                                   | 0.20  | 6.09  | 7.46E-18 | 2.88E-17 | purple |
| STK3     | 6788  | serine/threonine kinase 3 (STE20 homolog, yeast) (STK3), mRNA.                                                  | 0.29  | 7.39  | 1.39E-39 | 1.37E-38 | purple |

|          |        |                                                                             |       |      |          |          |        |
|----------|--------|-----------------------------------------------------------------------------|-------|------|----------|----------|--------|
| SVIL     | 6840   | supervillin (SVIL), transcript variant 2, mRNA.                             | 0.30  | 6.23 | 1.44E-33 | 1.08E-32 | purple |
| SYT11    | 23208  | synaptotagmin XI (SYT11), mRNA.                                             | -0.02 | 6.62 | 2.20E-01 | 2.59E-01 | purple |
| TBX15    | 6913   | T-box 15 (TBX15), mRNA.                                                     | -0.11 | 5.36 | 2.54E-08 | 5.76E-08 | purple |
| TCN2     | 6948   | transcobalamin II; macrocytic anemia (TCN2), mRNA.                          | -0.06 | 8.94 | 5.41E-05 | 9.64E-05 | purple |
| TIMD4    | 91937  | T-cell immunoglobulin and mucin domain containing 4 (TIMD4), mRNA.          | 0.06  | 6.85 | 6.42E-04 | 1.04E-03 | purple |
| TM6SF1   | 53346  | transmembrane 6 superfamily member 1 (TM6SF1), mRNA.                        | 0.06  | 7.91 | 6.86E-04 | 1.10E-03 | purple |
| TMEM119  | 338773 | transmembrane protein 119 (TMEM119), mRNA.                                  | 0.08  | 6.64 | 2.61E-05 | 4.79E-05 | purple |
| TMEM123  | 114908 | transmembrane protein 123 (TMEM123), mRNA.                                  | 0.10  | 8.66 | 8.26E-08 | 1.81E-07 | purple |
| TMEM230  | 29058  | chromosome 20 open reading frame 30 (C20orf30), transcript variant 2, mRNA. | 0.17  | 9.39 | 4.36E-26 | 2.47E-25 | purple |
| TMEM51   | 55092  | transmembrane protein 51 (TMEM51), mRNA.                                    | 0.28  | 8.04 | 1.61E-29 | 1.02E-28 | purple |
| TNFRSF21 | 27242  | tumor necrosis factor receptor superfamily, member 21 (TNFRSF21), mRNA.     | 0.09  | 9.82 | 2.46E-05 | 4.52E-05 | purple |
| TNFSF12  | 8742   | tumor necrosis factor (ligand) superfamily, member 12 (TNFSF12), mRNA.      | 0.18  | 5.98 | 1.87E-22 | 8.88E-22 | purple |

|         |        |                                                                       |       |      |          |          |        |
|---------|--------|-----------------------------------------------------------------------|-------|------|----------|----------|--------|
| TOX     | 9760   | thymus high mobility group box protein TOX (TOX), mRNA.               | -0.01 | 8.72 | 1.99E-01 | 2.37E-01 | purple |
| UBD     | 10537  | ubiquitin D (UBD), mRNA.                                              | 0.18  | 6.19 | 5.18E-26 | 2.92E-25 | purple |
| UPP1    | 7378   | uridine phosphorylase 1 (UPP1), transcript variant 2, mRNA.           | -0.01 | 6.88 | 3.99E-01 | 4.45E-01 | purple |
| VCAN    | 1462   | versican (VCAN), mRNA.                                                | 0.17  | 6.65 | 1.29E-20 | 5.68E-20 | purple |
| YES1    | 7525   | v-yes-1 Yamaguchi sarcoma viral oncogene homolog 1 (YES1), mRNA.      | 0.15  | 7.85 | 3.15E-18 | 1.23E-17 | purple |
| ZNF503  | 84858  | zinc finger protein 503 (ZNF503), mRNA.                               | -0.02 | 6.30 | 1.73E-01 | 2.08E-01 | purple |
| MARCH3  | 115123 | membrane-associated ring finger (C3HC4) 3 (MARCH3), mRNA.             | -0.12 | 9.07 | 8.23E-15 | 2.70E-14 | red    |
| SEPT3   | 55964  | septin 3 (SEPT3), transcript variant A, mRNA.                         | 0.41  | 7.11 | 2.37E-51 | 3.92E-50 | red    |
| AAK1    | 388957 | similar to BMP2 inducible kinase (DKFZp686K16132), mRNA.              | -0.12 | 7.97 | 1.08E-19 | 4.53E-19 | red    |
| ACY3    | 91703  | aspartoacylase (aminocyclase) 3 (ACY3), mRNA.                         | 0.28  | 9.28 | 7.85E-35 | 6.20E-34 | red    |
| ADAR    | 103    | adenosine deaminase, RNA-specific (ADAR), transcript variant 3, mRNA. | -0.03 | 6.83 | 6.15E-02 | 7.93E-02 | red    |
| ADI1    | 55256  | acireductone dioxygenase 1 (ADI1), mRNA.                              | -0.01 | 5.97 | 3.36E-01 | 3.81E-01 | red    |
| ADORA2A | 135    | adenosine A2a receptor (ADORA2A), mRNA.                               | 0.05  | 6.11 | 1.12E-04 | 1.94E-04 | red    |

|          |        |                                                                                                                |       |       |          |          |     |
|----------|--------|----------------------------------------------------------------------------------------------------------------|-------|-------|----------|----------|-----|
| AGPAT9   | 84803  | lung cancer metastasis-associated protein (MAG1), mRNA.                                                        | 0.02  | 5.39  | 3.13E-01 | 3.57E-01 | red |
| AIF1     | 199    | allograft inflammatory factor 1 (AIF1), transcript variant 1, mRNA.                                            | 0.02  | 12.71 | 2.63E-01 | 3.05E-01 | red |
| ALDH7A1  | 501    | aldehyde dehydrogenase 7 family, member A1 (ALDH7A1), mRNA.                                                    | -0.14 | 7.32  | 1.96E-20 | 8.57E-20 | red |
| ALOX5    | 240    | arachidonate 5-lipoxygenase (ALOX5), mRNA.                                                                     | 0.17  | 7.11  | 3.93E-24 | 2.04E-23 | red |
| AMER1    | 139285 | family with sequence similarity 123B (FAM123B), mRNA.                                                          | 0.05  | 9.86  | 1.25E-04 | 2.16E-04 | red |
| ANAPC13  | 25847  | anaphase promoting complex subunit 13 (ANAPC13), mRNA.                                                         | -0.02 | 6.98  | 2.93E-01 | 3.37E-01 | red |
| APOBEC3G | 60489  | apolipoprotein B mRNA editing enzyme, catalytic polypeptide-like 3G (APOBEC3G), mRNA.                          | 0.11  | 6.22  | 8.31E-08 | 1.82E-07 | red |
| APP      | 351    | amyloid beta (A4) precursor protein (peptidase nexin-II, Alzheimer disease) (APP), transcript variant 2, mRNA. | -0.23 | 7.70  | 1.56E-26 | 8.97E-26 | red |
| ARHGDIB  | 397    | Rho GDP dissociation inhibitor (GDI) beta (ARHGDIB), mRNA.                                                     | -0.18 | 9.14  | 1.41E-26 | 8.12E-26 | red |
| ARL2BP   | 23568  | ADP-ribosylation factor-like 2 binding protein (ARL2BP), mRNA.                                                 | -0.06 | 8.99  | 1.73E-03 | 2.68E-03 | red |

|         |       |                                                                                                |       |       |          |          |     |
|---------|-------|------------------------------------------------------------------------------------------------|-------|-------|----------|----------|-----|
| ARMCX1  | 51309 | armadillo repeat containing, X-linked 1 (ARMCX1), mRNA.                                        | -0.02 | 9.44  | 1.87E-01 | 2.23E-01 | red |
| ASPHD2  | 57168 | aspartate beta-hydroxylase domain containing 2 (ASPHD2), mRNA.                                 | 0.00  | 7.55  | 7.72E-01 | 8.01E-01 | red |
| ATF3    | 467   | activating transcription factor 3 (ATF3), transcript variant 1, mRNA.                          | 0.01  | 11.40 | 4.41E-01 | 4.88E-01 | red |
| ATP6V1A | 523   | ATPase, H <sup>+</sup> transporting, lysosomal 70kDa, V1 subunit A (ATP6V1A), mRNA.            | 0.09  | 6.74  | 5.31E-11 | 1.41E-10 | red |
| BATF    | 10538 | basic leucine zipper transcription factor, ATF-like (BATF), mRNA.                              | -0.17 | 6.55  | 2.55E-36 | 2.19E-35 | red |
| BBS2    | 583   | Bardet-Biedl syndrome 2 (BBS2), mRNA.                                                          | 0.03  | 6.96  | 1.52E-02 | 2.11E-02 | red |
| BCL11A  | 53335 | B-cell CLL/lymphoma 11A (zinc finger protein) (BCL11A), transcript variant 1, mRNA.            | 0.22  | 5.37  | 2.70E-15 | 9.06E-15 | red |
| BCL2L1  | 598   | BCL2-like 1 (BCL2L1), nuclear gene encoding mitochondrial protein, transcript variant 2, mRNA. | -0.82 | 7.35  | 1.09E-73 | 5.80E-72 | red |
| BIN2    | 51411 | bridging integrator 2 (BIN2), mRNA.                                                            | -0.02 | 9.19  | 2.20E-01 | 2.59E-01 | red |
| BLK     | 640   | B lymphoid tyrosine kinase (BLK), mRNA.                                                        | -0.33 | 6.40  | 5.91E-37 | 5.21E-36 | red |
| BSPRY   | 54836 | B-box and SPRY domain containing (BSPRY), mRNA.                                                | -0.25 | 6.99  | 4.60E-38 | 4.32E-37 | red |

|          |        |                                                                                                         |       |       |          |          |     |
|----------|--------|---------------------------------------------------------------------------------------------------------|-------|-------|----------|----------|-----|
| BST2     | 684    | bone marrow stromal cell antigen 2 (BST2), mRNA.                                                        | -0.09 | 7.64  | 6.06E-08 | 1.34E-07 | red |
| C12orf57 | 113246 | chromosome 12 open reading frame 57 (C12orf57), mRNA.                                                   | 0.00  | 8.35  | 8.74E-01 | 8.93E-01 | red |
| C19orf66 | 55337  | hypothetical protein FLJ11286 (FLJ11286), mRNA.                                                         | 0.06  | 7.97  | 6.17E-04 | 9.98E-04 | red |
| C1orf162 | 128346 | chromosome 1 open reading frame 162 (C1orf162), mRNA.                                                   | -0.04 | 9.84  | 1.54E-03 | 2.38E-03 | red |
| C1orf53  | 388722 | chromosome 1 open reading frame 53 (C1orf53), mRNA.                                                     | 0.39  | 7.15  | 6.99E-47 | 9.89E-46 | red |
| C22orf39 | 128977 | hypothetical protein LOC128977 (LOC128977), mRNA.                                                       | -0.01 | 8.55  | 6.08E-01 | 6.49E-01 | red |
| C5orf30  | 90355  | chromosome 5 open reading frame 30 (C5orf30), mRNA.                                                     | -0.17 | 7.55  | 4.15E-27 | 2.45E-26 | red |
| C9orf78  | 51759  | chromosome 9 open reading frame 78 (C9orf78), mRNA.                                                     | 0.11  | 10.53 | 1.08E-15 | 3.73E-15 | red |
| CAB39L   | 81617  | calcium binding protein 39-like (CAB39L), transcript variant 2, mRNA.                                   | 0.03  | 7.99  | 1.29E-01 | 1.58E-01 | red |
| CAMK2D   | 817    | calcium/calmodulin-dependent protein kinase (CaM kinase) II delta (CAMK2D), transcript variant 4, mRNA. | 0.21  | 8.57  | 1.45E-22 | 6.98E-22 | red |

|        |       |                                                                                                                            |       |      |          |          |     |
|--------|-------|----------------------------------------------------------------------------------------------------------------------------|-------|------|----------|----------|-----|
| CAMKK2 | 10645 | calcium/calmodulin-dependent protein kinase kinase 2, beta (CAMKK2), transcript variant 6, mRNA.                           | 0.06  | 8.31 | 1.02E-04 | 1.78E-04 | red |
| CASP1  | 834   | caspase 1, apoptosis-related cysteine peptidase (interleukin 1, beta, convertase) (CASP1), transcript variant gamma, mRNA. | 0.06  | 9.52 | 8.64E-05 | 1.51E-04 | red |
| CASP3  | 836   | caspase 3, apoptosis-related cysteine peptidase (CASP3), transcript variant alpha, mRNA.                                   | -0.06 | 9.17 | 2.18E-03 | 3.33E-03 | red |
| CCNE2  | 9134  | cyclin E2 (CCNE2), transcript variant 1, mRNA.                                                                             | 0.07  | 8.16 | 5.25E-05 | 9.36E-05 | red |
| CD38   | 952   | CD38 molecule (CD38), mRNA.                                                                                                | 0.05  | 6.55 | 1.35E-03 | 2.10E-03 | red |
| CD72   | 971   | CD72 molecule (CD72), mRNA.                                                                                                | 0.11  | 6.32 | 4.54E-08 | 1.01E-07 | red |
| CD99   | 4267  | CD99 molecule (CD99), mRNA.                                                                                                | -0.02 | 8.38 | 1.45E-01 | 1.76E-01 | red |
| CDK5R1 | 8851  | cyclin-dependent kinase 5, regulatory subunit 1 (p35) (CDK5R1), mRNA.                                                      | 0.07  | 9.66 | 2.03E-06 | 4.06E-06 | red |
| CDKN2C | 1031  | cyclin-dependent kinase inhibitor 2C (p18, inhibits CDK4) (CDKN2C), transcript variant 2, mRNA.                            | 0.58  | 9.86 | 3.28E-60 | 9.14E-59 | red |
| CELSR3 | 1951  | cadherin, EGF LAG seven-pass G-type receptor 3 (flamingo homolog, Drosophila) (CELSR3), mRNA.                              | 0.12  | 9.54 | 2.30E-18 | 9.03E-18 | red |
| CHMP5  | 51510 | chromatin modifying protein 5 (CHMP5), mRNA.                                                                               | -0.06 | 6.89 | 3.94E-06 | 7.73E-06 | red |



|          |        |                                                                                                          |       |       |          |          |     |
|----------|--------|----------------------------------------------------------------------------------------------------------|-------|-------|----------|----------|-----|
| CKB      | 1152   | creatine kinase, brain (CKB), mRNA.                                                                      | -0.26 | 5.91  | 1.87E-33 | 1.39E-32 | red |
| CLINT1   | 9685   | clathrin interactor 1 (CLINT1), mRNA.                                                                    | -0.06 | 6.55  | 1.56E-04 | 2.67E-04 | red |
| CMTM7    | 112616 | CKLF-like MARVEL transmembrane domain containing 7 (CMTM7), transcript variant 1, mRNA.                  | 0.13  | 6.99  | 5.40E-15 | 1.79E-14 | red |
| COL4A3BP | 10087  | collagen, type IV, alpha 3 (Goodpasture antigen) binding protein (COL4A3BP), transcript variant 2, mRNA. | 0.20  | 6.02  | 1.25E-24 | 6.67E-24 | red |
| CORO2A   | 7464   | coronin, actin binding protein, 2A (CORO2A), transcript variant 1, mRNA.                                 | 0.00  | 10.99 | 9.15E-01 | 9.28E-01 | red |
| CPEB4    | 80315  | cytoplasmic polyadenylation element binding protein 4 (CPEB4), mRNA.                                     | -0.07 | 10.84 | 3.22E-08 | 7.24E-08 | red |
| CSNK2A2  | 1459   | casein kinase 2, alpha prime polypeptide (CSNK2A2), mRNA.                                                | -0.08 | 7.57  | 6.63E-08 | 1.46E-07 | red |
| CSRNP1   | 64651  | AXIN1 up-regulated 1 (AXUD1), mRNA.                                                                      | 0.11  | 7.89  | 2.00E-13 | 6.08E-13 | red |
| CXorf38  | 159013 | chromosome X open reading frame 38 (CXorf38), mRNA.                                                      | 0.18  | 7.81  | 1.85E-15 | 6.24E-15 | red |
| CYB5B    | 80777  | cytochrome b5 type B (outer mitochondrial membrane) (CYB5B), mRNA.                                       | -0.17 | 8.27  | 5.10E-22 | 2.39E-21 | red |

|        |       |                                                                                                         |       |       |          |          |     |
|--------|-------|---------------------------------------------------------------------------------------------------------|-------|-------|----------|----------|-----|
| CYFIP1 | 23191 | cytoplasmic FMR1 interacting protein 1 (CYFIP1), transcript variant 2, mRNA.                            | 0.17  | 7.19  | 1.02E-22 | 4.95E-22 | red |
| CYP2J2 | 1573  | cytochrome P450, family 2, subfamily J, polypeptide 2 (CYP2J2), mRNA.                                   | 0.05  | 6.01  | 2.90E-03 | 4.35E-03 | red |
| DAD1   | 1603  | defender against cell death 1 (DAD1), mRNA.                                                             | 0.07  | 10.53 | 2.58E-06 | 5.11E-06 | red |
| DAPP1  | 27071 | dual adaptor of phosphotyrosine and 3-phosphoinositides (DAPP1), mRNA.                                  | 0.26  | 9.18  | 5.12E-42 | 5.70E-41 | red |
| DDT    | 1652  | D-dopachrome tautomerase (DDT), mRNA.                                                                   | 0.18  | 8.46  | 1.76E-18 | 6.97E-18 | red |
| DDX60  | 55601 | hypothetical protein FLJ20035 (FLJ20035), mRNA.                                                         | 0.02  | 11.98 | 3.18E-01 | 3.62E-01 | red |
| DEGS1  | 8560  | degenerative spermatocyte homolog 1, lipid desaturase (Drosophila) (DEGS1), transcript variant 1, mRNA. | -0.27 | 7.21  | 1.01E-37 | 9.26E-37 | red |
| DENND3 | 22898 | DENN/MADD domain containing 3 (DENND3), mRNA.                                                           | 0.13  | 6.60  | 1.92E-17 | 7.26E-17 | red |
| DESI1  | 27351 | DNA segment, Chr 15, Wayne State University 75, expressed (D15Wsu75e), mRNA.                            | -0.05 | 10.15 | 2.08E-05 | 3.85E-05 | red |
| DFNA5  | 1687  | deafness, autosomal dominant 5 (DFNA5), mRNA.                                                           | 0.41  | 7.53  | 7.35E-35 | 5.82E-34 | red |
| DHRS7  | 51635 | dehydrogenase/reductase (SDR family) member 7 (DHRS7), mRNA.                                            | 0.00  | 10.16 | 6.75E-01 | 7.11E-01 | red |

|         |        |                                                                                      |       |       |          |          |     |
|---------|--------|--------------------------------------------------------------------------------------|-------|-------|----------|----------|-----|
| DHRS9   | 10170  | dehydrogenase/reductase (SDR family) member 9 (DHRS9), transcript variant 2, mRNA.   | -0.08 | 7.51  | 6.43E-06 | 1.24E-05 | red |
| DHX58   | 79132  | likely ortholog of mouse D11lgp2 (LGP2), mRNA.                                       | 0.40  | 5.54  | 1.89E-26 | 1.08E-25 | red |
| DLL3    | 10683  | delta-like 3 (Drosophila) (DLL3), transcript variant 2, mRNA.                        | -0.05 | 6.58  | 1.24E-05 | 2.35E-05 | red |
| DNAJB6  | 10049  | DnaJ (Hsp40) homolog, subfamily B, member 6 (DNAJB6), transcript variant 1, mRNA.    | 0.02  | 5.83  | 2.93E-01 | 3.37E-01 | red |
| DUSP5   | 1847   | dual specificity phosphatase 5 (DUSP5), mRNA.                                        | -0.45 | 6.53  | 4.79E-60 | 1.32E-58 | red |
| E2F3    | 1871   | E2F transcription factor 3 (E2F3), mRNA.                                             | -0.56 | 10.67 | 6.18E-86 | 8.48E-84 | red |
| ECE2    | 84291  | hypothetical protein MGC2408 (MGC2408), mRNA.                                        | -0.04 | 8.45  | 7.30E-03 | 1.06E-02 | red |
| EIF2AK2 | 5610   | eukaryotic translation initiation factor 2-alpha kinase 2 (EIF2AK2), mRNA.           | -0.13 | 7.94  | 2.39E-12 | 6.85E-12 | red |
| ELK1    | 2002   | ELK1, member of ETS oncogene family (ELK1), mRNA.                                    | 0.58  | 9.11  | 3.24E-73 | 1.69E-71 | red |
| EPSTI1  | 94240  | epithelial stromal interaction 1 (breast) (EPSTI1), transcript variant 1, mRNA.      | 0.13  | 9.49  | 7.81E-20 | 3.31E-19 | red |
| FAM102A | 399665 | family with sequence similarity 102, member A (FAM102A), transcript variant 2, mRNA. | -0.06 | 6.86  | 1.56E-04 | 2.67E-04 | red |

|         |       |                                                                                                           |       |       |          |          |     |
|---------|-------|-----------------------------------------------------------------------------------------------------------|-------|-------|----------|----------|-----|
| FAM107B | 83641 | family with sequence similarity 107, member B (FAM107B), mRNA.                                            | -0.04 | 10.68 | 2.87E-03 | 4.31E-03 | red |
| FAM83D  | 81610 | family with sequence similarity 83, member D (FAM83D), mRNA.                                              | 0.02  | 8.78  | 1.09E-01 | 1.36E-01 | red |
| FARS2   | 10667 | phenylalanyl-tRNA synthetase 2, mitochondrial (FARS2), nuclear gene encoding mitochondrial protein, mRNA. | 0.01  | 11.58 | 2.90E-01 | 3.34E-01 | red |
| FBXO6   | 26270 | F-box protein 6 (FBXO6), mRNA.                                                                            | -0.14 | 6.02  | 4.72E-14 | 1.49E-13 | red |
| FERMT2  | 10979 | pleckstrin homology domain containing, family C (with FERM domain) member 1 (PLEKHC1), mRNA.              | -0.13 | 7.97  | 2.01E-16 | 7.22E-16 | red |
| FGL2    | 10875 | fibrinogen-like 2 (FGL2), mRNA.                                                                           | -0.05 | 5.49  | 2.43E-04 | 4.09E-04 | red |
| FHL3    | 2275  | four and a half LIM domains 3 (FHL3), mRNA.                                                               | -0.09 | 9.75  | 3.17E-13 | 9.57E-13 | red |
| FLOT2   | 2319  | flotillin 2 (FLOT2), mRNA.                                                                                | -0.09 | 7.78  | 2.52E-07 | 5.36E-07 | red |
| FOXO3   | 2309  | forkhead box O3A (FOXO3A), transcript variant 1, mRNA.                                                    | -0.21 | 7.51  | 1.03E-23 | 5.27E-23 | red |
| FYN     | 2534  | FYN oncogene related to SRC, FGR, YES (FYN), transcript variant 1, mRNA.                                  | -0.16 | 7.18  | 4.59E-21 | 2.05E-20 | red |
| FZD6    | 8323  | frizzled homolog 6 (Drosophila) (FZD6), mRNA.                                                             | -0.37 | 6.58  | 3.32E-53 | 5.89E-52 | red |

|         |        |                                                                                    |       |       |          |          |     |
|---------|--------|------------------------------------------------------------------------------------|-------|-------|----------|----------|-----|
| GBP1    | 2633   | guanylate binding protein 1, interferon-inducible, 67kDa (GBP1), mRNA.             | -0.11 | 7.54  | 3.32E-14 | 1.06E-13 | red |
| GBP2    | 2634   | guanylate binding protein 2, interferon-inducible (GBP2), mRNA.                    | 0.03  | 6.98  | 4.44E-02 | 5.84E-02 | red |
| GBP4    | 115361 | guanylate binding protein 4 (GBP4), mRNA.                                          | 0.03  | 9.44  | 2.77E-02 | 3.73E-02 | red |
| GBP5    | 115362 | guanylate binding protein 5 (GBP5), mRNA.                                          | -0.03 | 8.55  | 9.06E-02 | 1.14E-01 | red |
| GINM1   | 116254 | chromosome 6 open reading frame 72 (C6orf72), mRNA.                                | 0.07  | 8.28  | 1.76E-08 | 4.04E-08 | red |
| GJB2    | 2706   | gap junction protein, beta 2, 26kDa (GJB2), mRNA.                                  | 0.04  | 10.07 | 2.08E-02 | 2.85E-02 | red |
| GK      | 2710   | glycerol kinase (GK), transcript variant 2, mRNA.                                  | 0.08  | 7.92  | 1.91E-07 | 4.09E-07 | red |
| GLDC    | 2731   | glycine dehydrogenase (decarboxylating) (GLDC), mRNA.                              | 0.01  | 6.67  | 6.47E-01 | 6.85E-01 | red |
| GLYATL2 | 219970 | glycine-N-acyltransferase-like 2 (GLYATL2), mRNA.                                  | -0.07 | 8.53  | 7.27E-06 | 1.39E-05 | red |
| GMPR    | 2766   | guanosine monophosphate reductase (GMPR), mRNA.                                    | 0.09  | 8.37  | 1.33E-06 | 2.68E-06 | red |
| GNA15   | 2769   | guanine nucleotide binding protein (G protein), alpha 15 (Gq class) (GNA15), mRNA. | 0.03  | 11.34 | 4.26E-02 | 5.61E-02 | red |
| GNPDA1  | 10007  | glucosamine-6-phosphate deaminase 1 (GNPDA1), mRNA.                                | -0.03 | 8.13  | 1.38E-01 | 1.68E-01 | red |

|         |        |                                                                                                              |       |      |          |          |     |
|---------|--------|--------------------------------------------------------------------------------------------------------------|-------|------|----------|----------|-----|
| GNS     | 2799   | glucosamine (N-acetyl)-6-sulfatase (Sanfilippo disease IIID) (GNS), mRNA.                                    | 0.07  | 8.79 | 1.32E-04 | 2.28E-04 | red |
| GP1R    | 2852   | G protein-coupled receptor 30 (GP1R30), transcript variant 2, mRNA.                                          | -0.01 | 6.96 | 3.24E-01 | 3.69E-01 | red |
| GP1MB   | 10457  | glycoprotein (transmembrane) 1mb (GP1MB), transcript variant 1, mRNA.                                        | 0.01  | 6.76 | 4.76E-01 | 5.21E-01 | red |
| GP1R80  | 160897 | G protein-coupled receptor 180 (GP1R80), mRNA.                                                               | -0.09 | 6.16 | 3.41E-05 | 6.19E-05 | red |
| GP1R63  | 81491  | G protein-coupled receptor 63 (GP1R63), mRNA.                                                                | -0.11 | 7.97 | 2.04E-13 | 6.20E-13 | red |
| GT1F3A  | 2971   | general transcription factor 111A (GT1F3A), mRNA.                                                            | -0.09 | 7.18 | 4.75E-07 | 9.89E-07 | red |
| H2AFY   | 9555   | H2A histone family, member Y (H2AFY), transcript variant 1, mRNA.                                            | -0.05 | 8.48 | 2.26E-04 | 3.81E-04 | red |
| HEBP2   | 23593  | heme binding protein 2 (HEBP2), mRNA.                                                                        | -0.04 | 8.08 | 1.59E-03 | 2.47E-03 | red |
| HELZ2   | 85441  | peroxisomal proliferator-activated receptor A interacting complex 285 (PRIC285), transcript variant 2, mRNA. | -0.02 | 6.67 | 1.76E-01 | 2.11E-01 | red |
| HES4    | 57801  | hairy and enhancer of split 4 (Drosophila) (HES4), mRNA.                                                     | 0.60  | 7.94 | 1.74E-77 | 1.21E-75 | red |
| HNRNPA0 | 10949  | heterogeneous nuclear ribonucleoprotein A0 (HNRNPA0), mRNA.                                                  | -0.06 | 9.73 | 1.19E-03 | 1.87E-03 | red |

|         |       |                                                                                                  |       |       |          |          |     |
|---------|-------|--------------------------------------------------------------------------------------------------|-------|-------|----------|----------|-----|
| IDS     | 3423  | iduronate 2-sulfatase (Hunter syndrome) (IDS), transcript variant 1, mRNA.                       | 0.05  | 6.99  | 2.78E-03 | 4.18E-03 | red |
| IFI27   | 3429  | interferon, alpha-inducible protein 27 (IFI27), mRNA.                                            | 0.50  | 6.07  | 4.36E-47 | 6.23E-46 | red |
| IFI35   | 3430  | interferon-induced protein 35 (IFI35), mRNA.                                                     | -0.04 | 10.53 | 1.73E-04 | 2.95E-04 | red |
| IFI44   | 10561 | interferon-induced protein 44 (IFI44), mRNA.                                                     | 0.05  | 8.53  | 3.81E-03 | 5.67E-03 | red |
| IFI44L  | 10964 | interferon-induced protein 44-like (IFI44L), mRNA.                                               | 0.06  | 10.56 | 6.93E-08 | 1.53E-07 | red |
| IFIH1   | 64135 | interferon induced with helicase C domain 1 (IFIH1), mRNA.                                       | 0.02  | 5.83  | 1.02E-01 | 1.28E-01 | red |
| IFIT1   | 3434  | interferon-induced protein with tetratricopeptide repeats 1 (IFIT1), transcript variant 2, mRNA. | -0.13 | 7.77  | 6.04E-12 | 1.69E-11 | red |
| IFIT2   | 3433  | interferon-induced protein with tetratricopeptide repeats 2 (IFIT2), mRNA.                       | 0.06  | 9.41  | 4.11E-05 | 7.41E-05 | red |
| IFITM1  | 8519  | interferon induced transmembrane protein 1 (9-27) (IFITM1), mRNA.                                | 0.01  | 6.73  | 4.78E-01 | 5.24E-01 | red |
| IFITM2  | 10581 | interferon induced transmembrane protein 2 (1-8D) (IFITM2), mRNA.                                | -0.30 | 7.96  | 3.69E-31 | 2.50E-30 | red |
| IFITM3  | 10410 | interferon induced transmembrane protein 3 (1-8U) (IFITM3), mRNA.                                | 0.01  | 9.02  | 6.21E-01 | 6.61E-01 | red |
| IGF2BP3 | 10643 | insulin-like growth factor 2 mRNA binding protein 3 (IGF2BP3), mRNA.                             | 0.01  | 10.12 | 6.74E-01 | 7.10E-01 | red |

|         |       |                                                                                    |       |      |          |          |     |
|---------|-------|------------------------------------------------------------------------------------|-------|------|----------|----------|-----|
| IL13RA1 | 3597  | interleukin 13 receptor, alpha 1 (IL13RA1), mRNA.                                  | -0.04 | 8.94 | 1.73E-02 | 2.39E-02 | red |
| IL6     | 3569  | interleukin 6 (interferon, beta 2) (IL6), mRNA.                                    | 0.13  | 7.21 | 8.24E-15 | 2.70E-14 | red |
| INPP5D  | 3635  | inositol polyphosphate-5-phosphatase, 145kDa (INPP5D), transcript variant 1, mRNA. | -0.05 | 8.55 | 1.30E-04 | 2.24E-04 | red |
| INTS12  | 57117 | integrator complex subunit 12 (INTS12), mRNA.                                      | -0.10 | 6.32 | 1.64E-07 | 3.54E-07 | red |
| IQCG    | 84223 | IQ motif containing G (IQCG), mRNA.                                                | -0.01 | 6.71 | 5.19E-01 | 5.63E-01 | red |
| IRF4    | 3662  | interferon regulatory factor 4 (IRF4), mRNA.                                       | -0.05 | 7.58 | 1.43E-03 | 2.23E-03 | red |
| IRF7    | 3665  | interferon regulatory factor 7 (IRF7), transcript variant a, mRNA.                 | 0.02  | 6.85 | 3.93E-01 | 4.39E-01 | red |
| IRF9    | 10379 | interferon-stimulated transcription factor 3, gamma 48kDa (ISGF3G), mRNA.          | -0.07 | 7.61 | 1.86E-04 | 3.16E-04 | red |
| ISG15   | 9636  | ISG15 ubiquitin-like modifier (ISG15), mRNA.                                       | 0.00  | 9.89 | 9.03E-01 | 9.19E-01 | red |
| JADE2   | 23338 | PHD finger protein 15 (PHF15), mRNA.                                               | -0.01 | 8.29 | 3.22E-01 | 3.66E-01 | red |
| KCNK12  | 56660 | potassium channel, subfamily K, member 12 (KCNK12), mRNA.                          | -0.13 | 6.73 | 8.07E-11 | 2.12E-10 | red |
| KIFAP3  | 22920 | kinesin-associated protein 3 (KIFAP3), mRNA.                                       | -0.13 | 8.78 | 1.90E-15 | 6.41E-15 | red |
| KLHL14  | 57565 | kelch-like 14 (Drosophila) (KLHL14), mRNA.                                         | 0.05  | 8.31 | 3.74E-04 | 6.18E-04 | red |
| KLHL6   | 89857 | kelch-like 6 (Drosophila) (KLHL6), mRNA.                                           | -0.03 | 6.52 | 1.80E-02 | 2.47E-02 | red |



|         |       |                                                                                   |       |      |          |          |     |
|---------|-------|-----------------------------------------------------------------------------------|-------|------|----------|----------|-----|
| L1TD1   | 54596 | LINE-1 type transposase domain containing 1 (L1TD1), mRNA.                        | -0.05 | 7.11 | 2.27E-02 | 3.09E-02 | red |
| LAG3    | 3902  | lymphocyte-activation gene 3 (LAG3), mRNA.                                        | 0.00  | 8.28 | 9.05E-01 | 9.20E-01 | red |
| LAMP5   | 24141 | chromosome 20 open reading frame 103 (C20orf103), mRNA.                           | 0.09  | 7.82 | 3.04E-10 | 7.73E-10 | red |
| LAP3    | 51056 | leucine aminopeptidase 3 (LAP3), mRNA.                                            | -0.15 | 6.06 | 2.00E-22 | 9.51E-22 | red |
| LAPTM4B | 55353 | lysosomal associated protein transmembrane 4 beta (LAPTM4B), mRNA.                | 0.16  | 6.37 | 1.45E-24 | 7.70E-24 | red |
| LARGE   | 9215  | like-glycosyltransferase (LARGE), transcript variant 1, mRNA.                     | 0.30  | 8.57 | 3.09E-46 | 4.23E-45 | red |
| LARP6   | 55323 | La ribonucleoprotein domain family, member 6 (LARP6), transcript variant 1, mRNA. | -0.19 | 9.32 | 1.51E-27 | 9.07E-27 | red |
| LPAR6   | 10161 | purinergic receptor P2Y, G-protein coupled, 5 (P2RY5), mRNA.                      | -0.02 | 8.55 | 1.64E-01 | 1.98E-01 | red |
| LRRC8C  | 84230 | leucine rich repeat containing 8 family, member C (LRRC8C), mRNA.                 | -0.04 | 5.69 | 1.14E-02 | 1.60E-02 | red |
| LSAMP   | 4045  | limbic system-associated membrane protein (LSAMP), mRNA.                          | -0.09 | 8.03 | 3.84E-05 | 6.93E-05 | red |
| LXN     | 56925 | latexin (LXN), mRNA.                                                              | 0.10  | 7.64 | 7.60E-08 | 1.67E-07 | red |
| LY6E    | 4061  | lymphocyte antigen 6 complex, locus E (LY6E), mRNA.                               | 0.14  | 6.36 | 2.09E-16 | 7.47E-16 | red |

|         |        |                                                                                                                 |       |      |          |          |     |
|---------|--------|-----------------------------------------------------------------------------------------------------------------|-------|------|----------|----------|-----|
| MAPRE2  | 10982  | microtubule-associated protein, RP/EB family, member 2 (MAPRE2), mRNA.                                          | 0.11  | 8.94 | 1.79E-16 | 6.42E-16 | red |
| MARK1   | 4139   | MAP/microtubule affinity-regulating kinase 1 (MARK1), mRNA.                                                     | 0.03  | 6.52 | 9.09E-02 | 1.14E-01 | red |
| MB21D2  | 151963 | chromosome 3 open reading frame 59 (C3orf59), mRNA.                                                             | -0.11 | 8.09 | 2.67E-14 | 8.50E-14 | red |
| MEIS2   | 4212   | Meis homeobox 2 (MEIS2), transcript variant c, mRNA.                                                            | 0.14  | 7.54 | 3.78E-16 | 1.33E-15 | red |
| MGEA5   | 10724  | meningioma expressed antigen 5 (hyaluronidase) (MGEA5), mRNA.                                                   | -0.15 | 9.52 | 6.60E-21 | 2.93E-20 | red |
| MID1IP1 | 58526  | MID1 interacting protein 1 (gastrulation specific G12 homolog (zebrafish)) (MID1IP1), mRNA.                     | -0.23 | 7.61 | 2.97E-36 | 2.54E-35 | red |
| MLLT11  | 10962  | myeloid/lymphoid or mixed-lineage leukemia (trithorax homolog, Drosophila); translocated to, 11 (MLLT11), mRNA. | -0.06 | 7.34 | 3.42E-03 | 5.11E-03 | red |
| MNDA    | 4332   | myeloid cell nuclear differentiation antigen (MNDA), mRNA.                                                      | 0.30  | 8.19 | 2.52E-35 | 2.04E-34 | red |
| MOCOS   | 55034  | molybdenum cofactor sulfurase (MOCOS), mRNA.                                                                    | -0.24 | 6.23 | 4.77E-31 | 3.21E-30 | red |

|         |        |                                                                                                  |       |       |          |          |     |
|---------|--------|--------------------------------------------------------------------------------------------------|-------|-------|----------|----------|-----|
| MRPL44  | 65080  | mitochondrial ribosomal protein L44 (MRPL44), nuclear gene encoding mitochondrial protein, mRNA. | -0.20 | 7.69  | 1.70E-33 | 1.27E-32 | red |
| MSI2    | 124540 | musashi homolog 2 (Drosophila) (MSI2), transcript variant 1, mRNA.                               | 0.07  | 9.39  | 2.43E-10 | 6.25E-10 | red |
| MX1     | 4599   | myxovirus (influenza virus) resistance 1, interferon-inducible protein p78 (mouse) (MX1), mRNA.  | 0.36  | 8.49  | 9.91E-46 | 1.32E-44 | red |
| MYB     | 4602   | v-myb myeloblastosis viral oncogene homolog (avian) (MYB), mRNA.                                 | 0.12  | 7.46  | 7.73E-11 | 2.04E-10 | red |
| MYO5A   | 4644   | myosin VA (heavy chain 12, myoxin) (MYO5A), mRNA.                                                | -0.16 | 8.22  | 2.75E-15 | 9.21E-15 | red |
| NA      | 648    | BMI1 polycomb ring finger oncogene (BMI1), mRNA.                                                 | 0.13  | 8.28  | 2.52E-14 | 8.05E-14 | red |
| NAGK    | 55577  | N-acetylglucosamine kinase (NAGK), mRNA.                                                         | 0.10  | 7.80  | 2.05E-09 | 4.98E-09 | red |
| NCOA1   | 8648   | nuclear receptor coactivator 1 (NCOA1), transcript variant 1, mRNA.                              | -0.22 | 11.40 | 3.55E-36 | 3.01E-35 | red |
| NDUFAF6 | 137682 | chromosome 8 open reading frame 38 (C8orf38), mRNA.                                              | -0.09 | 7.85  | 5.62E-07 | 1.16E-06 | red |
| NEIL2   | 252969 | nei like 2 (E. coli) (NEIL2), mRNA.                                                              | 0.11  | 7.44  | 1.01E-09 | 2.48E-09 | red |
| NEUROG2 | 63973  | neurogenin 2 (NEUROG2), mRNA.                                                                    | 0.17  | 7.56  | 1.80E-18 | 7.12E-18 | red |

|         |        |                                                                                                                  |       |       |          |          |     |
|---------|--------|------------------------------------------------------------------------------------------------------------------|-------|-------|----------|----------|-----|
| NFAT5   | 10725  | nuclear factor of activated T-cells 5, tonicity-responsive (NFAT5), transcript variant 5, mRNA.                  | -0.03 | 6.88  | 3.77E-01 | 4.22E-01 | red |
| NGFRAP1 | 27018  | nerve growth factor receptor (TNFRSF16) associated protein 1 (NGFRAP1), transcript variant 3, mRNA.              | -0.06 | 9.45  | 1.21E-06 | 2.45E-06 | red |
| NKIRAS1 | 28512  | NFkB inhibitor interacting Ras-like 1 (NKIRAS1), mRNA.                                                           | 0.36  | 6.20  | 1.83E-42 | 2.09E-41 | red |
| NME7    | 29922  | non-metastatic cells 7, protein expressed in (nucleoside-diphosphate kinase) (NME7), transcript variant 1, mRNA. | -0.08 | 8.45  | 2.12E-09 | 5.14E-09 | red |
| NSF     | 4905   | PREDICTED: N-ethylmaleimide-sensitive factor (NSF), mRNA.                                                        | -0.16 | 7.15  | 1.68E-24 | 8.88E-24 | red |
| NSG1    | 27065  | DNA segment on chromosome 4 (unique) 234 expressed sequence (D4S234E), mRNA.                                     | 0.03  | 11.29 | 3.22E-02 | 4.30E-02 | red |
| NT5C3A  | 51251  | 5'-nucleotidase, cytosolic III (NT5C3), transcript variant 2, mRNA.                                              | -0.04 | 9.42  | 2.24E-02 | 3.06E-02 | red |
| NT5DC1  | 221294 | 5'-nucleotidase domain containing 1 (NT5DC1), mRNA.                                                              | -0.16 | 8.65  | 2.42E-24 | 1.27E-23 | red |
| NT5E    | 4907   | 5'-nucleotidase, ecto (CD73) (NT5E), mRNA.                                                                       | 0.12  | 8.52  | 1.14E-15 | 3.91E-15 | red |
| OAS1    | 4938   | 2',5'-oligoadenylate synthetase 1, 40/46kDa (OAS1), transcript variant 2, mRNA.                                  | 0.47  | 9.38  | 9.82E-56 | 2.04E-54 | red |

|        |        |                                                                                                                                      |       |      |          |          |     |
|--------|--------|--------------------------------------------------------------------------------------------------------------------------------------|-------|------|----------|----------|-----|
| OXCT2  | 64064  | 3-oxoacid CoA transferase 2 (OXCT2), mRNA.                                                                                           | 0.94  | 6.94 | 5.85E-76 | 3.66E-74 | red |
| OXR1   | 55074  | oxidation resistance 1 (OXR1), mRNA.                                                                                                 | -0.06 | 8.28 | 2.03E-05 | 3.75E-05 | red |
| P4HA2  | 8974   | procollagen-proline, 2-oxoglutarate 4-dioxygenase (proline 4-hydroxylase), alpha polypeptide II (P4HA2), transcript variant 1, mRNA. | 0.01  | 8.73 | 3.37E-01 | 3.82E-01 | red |
| PABPC4 | 400455 | PREDICTED: hypothetical LOC400455 (LOC400455), mRNA.                                                                                 | -0.05 | 6.71 | 1.53E-03 | 2.37E-03 | red |
| PAK2   | 5062   | p21 (CDKN1A)-activated kinase 2 (PAK2), mRNA.                                                                                        | -0.22 | 8.09 | 6.20E-28 | 3.78E-27 | red |
| PARP12 | 64761  | poly (ADP-ribose) polymerase family, member 12 (PARP12), mRNA.                                                                       | 0.11  | 6.88 | 6.07E-09 | 1.44E-08 | red |
| PARP14 | 54625  | poly (ADP-ribose) polymerase family, member 14 (PARP14), mRNA.                                                                       | 0.11  | 7.94 | 5.69E-18 | 2.21E-17 | red |
| PARP9  | 83666  | poly (ADP-ribose) polymerase family, member 9 (PARP9), mRNA.                                                                         | 0.06  | 5.76 | 2.47E-06 | 4.91E-06 | red |
| PBX3   | 5090   | pre-B-cell leukemia homeobox 3 (PBX3), mRNA.                                                                                         | 0.00  | 6.71 | 7.82E-01 | 8.10E-01 | red |
| PCED1B | 91523  | family with sequence similarity 113, member B (FAM113B), mRNA.                                                                       | 0.10  | 6.69 | 1.10E-10 | 2.87E-10 | red |

|       |       |                                                                                                                             |       |      |          |          |     |
|-------|-------|-----------------------------------------------------------------------------------------------------------------------------|-------|------|----------|----------|-----|
| PDE4B | 5142  | phosphodiesterase 4B, cAMP-specific (phosphodiesterase E4 dunce homolog, Drosophila) (PDE4B), transcript variant b, mRNA.   | 0.02  | 7.39 | 1.24E-01 | 1.53E-01 | red |
| PDE6B | 5158  | phosphodiesterase 6B, cGMP-specific, rod, beta (congenital stationary night blindness 3, autosomal dominant) (PDE6B), mRNA. | -0.12 | 9.28 | 2.96E-15 | 9.90E-15 | red |
| PDK3  | 5165  | pyruvate dehydrogenase kinase, isozyme 3 (PDK3), mRNA.                                                                      | 0.03  | 6.52 | 5.90E-02 | 7.62E-02 | red |
| PDPR  | 55066 | pyruvate dehydrogenase phosphatase regulatory subunit (PDPR), mRNA.                                                         | -0.22 | 9.56 | 2.28E-38 | 2.15E-37 | red |
| PELO  | 53918 | pelota homolog (Drosophila) (PELO), mRNA.                                                                                   | -0.03 | 6.97 | 2.59E-02 | 3.50E-02 | red |
| PERP  | 64065 | PERP, TP53 apoptosis effector (PERP), mRNA.                                                                                 | 0.08  | 8.31 | 2.46E-07 | 5.22E-07 | red |
| PHF10 | 55274 | PHD finger protein 10 (PHF10), transcript variant 2, mRNA.                                                                  | 0.07  | 7.54 | 1.09E-03 | 1.71E-03 | red |
| PHF11 | 51131 | PHD finger protein 11 (PHF11), transcript variant 2, mRNA.                                                                  | -0.03 | 8.27 | 6.13E-02 | 7.90E-02 | red |
| PIAS2 | 9063  | protein inhibitor of activated STAT, 2 (PIAS2), transcript variant alpha, mRNA.                                             | 0.13  | 8.44 | 1.43E-16 | 5.15E-16 | red |

|         |       |                                                                                                |       |       |          |          |     |
|---------|-------|------------------------------------------------------------------------------------------------|-------|-------|----------|----------|-----|
| PIP5K1B | 8395  | phosphatidylinositol-4-phosphate 5-kinase, type I, beta (PIP5K1B), transcript variant 2, mRNA. | -0.07 | 10.62 | 7.35E-06 | 1.41E-05 | red |
| PKP2    | 5318  | plakophilin 2 (PKP2), transcript variant 2b, mRNA.                                             | -0.02 | 10.02 | 9.96E-02 | 1.25E-01 | red |
| PLA2G16 | 11145 | HRAS-like suppressor 3 (HRASLS3), mRNA.                                                        | -0.22 | 7.53  | 2.08E-37 | 1.87E-36 | red |
| PLAGL2  | 5326  | pleiomorphic adenoma gene-like 2 (PLAGL2), mRNA.                                               | -0.03 | 7.44  | 1.68E-01 | 2.02E-01 | red |
| PLEKHF2 | 79666 | pleckstrin homology domain containing, family F (with FYVE domain) member 2 (PLEKHF2), mRNA.   | -0.01 | 10.48 | 2.46E-01 | 2.86E-01 | red |
| PLSCR1  | 5359  | phospholipid scramblase 1 (PLSCR1), mRNA.                                                      | 0.03  | 10.81 | 1.11E-03 | 1.75E-03 | red |
| PLTP    | 5360  | phospholipid transfer protein (PLTP), transcript variant 2, mRNA.                              | 0.03  | 8.99  | 3.85E-02 | 5.10E-02 | red |
| PMM2    | 5373  | phosphomannomutase 2 (PMM2), mRNA.                                                             | -0.03 | 6.40  | 1.49E-01 | 1.81E-01 | red |
| POLE3   | 54107 | polymerase (DNA directed), epsilon 3 (p17 subunit) (POLE3), mRNA.                              | 0.02  | 8.72  | 1.45E-01 | 1.76E-01 | red |
| POP1    | 10940 | processing of precursor 1, ribonuclease P/MRP subunit (S. cerevisiae) (POP1), mRNA.            | 0.05  | 7.09  | 1.67E-02 | 2.31E-02 | red |

|          |        |                                                                                              |       |       |          |          |     |
|----------|--------|----------------------------------------------------------------------------------------------|-------|-------|----------|----------|-----|
| PPP1R11  | 6992   | protein phosphatase 1, regulatory (inhibitor) subunit 11 (PPP1R11), mRNA.                    | 0.08  | 11.00 | 3.39E-04 | 5.63E-04 | red |
| PPP1R16B | 26051  | protein phosphatase 1, regulatory (inhibitor) subunit 16B (PPP1R16B), mRNA.                  | -0.08 | 8.48  | 4.30E-07 | 8.97E-07 | red |
| PRADC1   | 84279  | chromosome 2 open reading frame 7 (C2orf7), mRNA.                                            | -0.11 | 11.45 | 3.44E-16 | 1.21E-15 | red |
| PRICKLE1 | 144165 | prickle homolog 1 (Drosophila) (PRICKLE1), mRNA.                                             | -0.07 | 8.18  | 6.91E-05 | 1.22E-04 | red |
| RAB13    | 5872   | RAB13, member RAS oncogene family (RAB13), mRNA.                                             | -0.02 | 8.12  | 1.86E-01 | 2.22E-01 | red |
| RALGPS2  | 55103  | Ral GEF with PH domain and SH3 binding motif 2 (RALGPS2), transcript variant 2, mRNA.        | -0.11 | 8.38  | 3.83E-11 | 1.02E-10 | red |
| RAP1GDS1 | 5910   | RAP1, GTP-GDP dissociation stimulator 1 (RAP1GDS1), mRNA.                                    | -0.01 | 11.56 | 6.32E-01 | 6.71E-01 | red |
| RARRES3  | 5920   | retinoic acid receptor responder (tazarotene induced) 3 (RARRES3), mRNA.                     | -0.09 | 6.93  | 5.78E-14 | 1.82E-13 | red |
| RASA1    | 5921   | RAS p21 protein activator (GTPase activating protein) 1 (RASA1), transcript variant 1, mRNA. | -0.08 | 7.48  | 1.80E-07 | 3.87E-07 | red |



|         |        |                                                                                                 |       |      |          |          |     |
|---------|--------|-------------------------------------------------------------------------------------------------|-------|------|----------|----------|-----|
| RBCK1   | 10616  | RanBP-type and C3HC4-type zinc finger containing 1 (RBCK1), transcript variant 2, mRNA.         | -0.06 | 5.70 | 7.84E-04 | 1.26E-03 | red |
| RBM18   | 92400  | RNA binding motif protein 18 (RBM18), mRNA.                                                     | -0.01 | 6.29 | 5.17E-01 | 5.62E-01 | red |
| RCN2    | 5955   | reticulocalbin 2, EF-hand calcium binding domain (RCN2), mRNA.                                  | -0.46 | 5.92 | 3.83E-46 | 5.21E-45 | red |
| RRS1    | 23212  | RRS1 ribosome biogenesis regulator homolog (S. cerevisiae) (RRS1), mRNA.                        | -0.03 | 6.27 | 1.52E-02 | 2.12E-02 | red |
| RTN4IP1 | 84816  | reticulon 4 interacting protein 1 (RTN4IP1), nuclear gene encoding mitochondrial protein, mRNA. | 0.06  | 7.50 | 3.05E-03 | 4.57E-03 | red |
| SALL2   | 6297   | sal-like 2 (Drosophila) (SALL2), mRNA.                                                          | -0.06 | 6.10 | 5.88E-05 | 1.05E-04 | red |
| SAMD9L  | 219285 | sterile alpha motif domain containing 9-like (SAMD9L), mRNA.                                    | 0.05  | 8.93 | 3.84E-04 | 6.35E-04 | red |
| SAT1    | 6303   | spermidine/spermine N1-acetyltransferase 1 (SAT1), mRNA.                                        | -0.04 | 8.09 | 1.21E-03 | 1.90E-03 | red |
| SEC22B  | 9554   | SEC22 vesicle trafficking protein homolog B (S. cerevisiae) (SEC22B), mRNA.                     | -0.03 | 5.61 | 1.32E-01 | 1.62E-01 | red |
| SIDT1   | 54847  | SID1 transmembrane family, member 1 (SIDT1), mRNA.                                              | 0.02  | 5.70 | 3.16E-01 | 3.60E-01 | red |

|          |        |                                                                                                                                          |       |       |          |          |     |
|----------|--------|------------------------------------------------------------------------------------------------------------------------------------------|-------|-------|----------|----------|-----|
| SIRPA    | 140885 | signal-regulatory protein alpha (SIRPA), transcript variant 1, mRNA.                                                                     | 0.05  | 8.00  | 2.58E-03 | 3.90E-03 | red |
| SLC2A3   | 6515   | solute carrier family 2 (facilitated glucose transporter), member 3 (SLC2A3), mRNA.                                                      | 0.02  | 10.87 | 5.28E-02 | 6.87E-02 | red |
| SLC9A3R1 | 9368   | solute carrier family 9 (sodium/hydrogen exchanger), member 3 regulator 1 (SLC9A3R1), mRNA.                                              | -0.17 | 6.76  | 3.72E-24 | 1.94E-23 | red |
| SMAP1    | 60682  | stromal membrane-associated protein 1 (SMAP1), transcript variant 1, mRNA.                                                               | -0.06 | 7.71  | 4.66E-03 | 6.87E-03 | red |
| SMARCA2  | 6595   | SWI/SNF related, matrix associated, actin dependent regulator of chromatin, subfamily a, member 2 (SMARCA2), transcript variant 2, mRNA. | -0.02 | 8.23  | 2.45E-01 | 2.86E-01 | red |
| SP110    | 3431   | SP110 nuclear body protein (SP110), transcript variant b, mRNA.                                                                          | 0.24  | 7.38  | 1.31E-31 | 9.10E-31 | red |
| SPA17    | 53340  | sperm autoantigenic protein 17 (SPA17), mRNA.                                                                                            | -0.22 | 7.75  | 1.94E-26 | 1.11E-25 | red |
| SPAG6    | 9576   | sperm associated antigen 6 (SPAG6), transcript variant 1, mRNA.                                                                          | -0.03 | 6.71  | 3.16E-02 | 4.22E-02 | red |
| SPIRE1   | 56907  | spire homolog 1 (Drosophila) (SPIRE1), mRNA.                                                                                             | 0.04  | 10.44 | 2.56E-03 | 3.88E-03 | red |

|         |       |                                                                                                   |       |       |          |          |     |
|---------|-------|---------------------------------------------------------------------------------------------------|-------|-------|----------|----------|-----|
| ST3GAL6 | 10402 | ST3 beta-galactoside alpha-2,3-sialyltransferase 6 (ST3GAL6), mRNA.                               | -0.02 | 8.18  | 1.06E-01 | 1.31E-01 | red |
| STAP1   | 26228 | BCR downstream signaling 1 (BRDG1), mRNA.                                                         | -0.29 | 6.72  | 1.60E-37 | 1.45E-36 | red |
| STAT1   | 6772  | signal transducer and activator of transcription 1, 91kDa (STAT1), transcript variant beta, mRNA. | 0.20  | 5.98  | 5.85E-19 | 2.38E-18 | red |
| STAT2   | 6773  | signal transducer and activator of transcription 2, 113kDa (STAT2), mRNA.                         | -0.16 | 8.49  | 1.42E-18 | 5.65E-18 | red |
| STK4    | 6789  | serine/threonine kinase 4 (STK4), mRNA.                                                           | -0.10 | 6.73  | 4.36E-11 | 1.16E-10 | red |
| STRADB  | 55437 | amyotrophic lateral sclerosis 2 (juvenile) chromosome region, candidate 2 (ALS2CR2), mRNA.        | -0.12 | 6.08  | 4.22E-14 | 1.33E-13 | red |
| SUSD1   | 64420 | sushi domain containing 1 (SUSD1), mRNA.                                                          | -0.08 | 7.43  | 2.25E-11 | 6.11E-11 | red |
| SYBU    | 55638 | hypothetical protein FLJ20366 (FLJ20366), mRNA.                                                   | -0.07 | 7.83  | 3.74E-05 | 6.77E-05 | red |
| SYNM    | 23336 | desmuslin (DMN), transcript variant B, mRNA.                                                      | 0.13  | 6.77  | 8.32E-11 | 2.19E-10 | red |
| TEAD4   | 7004  | TEA domain family member 4 (TEAD4), transcript variant 2, mRNA.                                   | -0.11 | 10.04 | 1.37E-12 | 3.98E-12 | red |
| THAP10  | 56906 | THAP domain containing 10 (THAP10), mRNA.                                                         | 0.02  | 10.70 | 1.48E-02 | 2.06E-02 | red |

|          |       |                                                                                                                  |       |      |          |          |     |
|----------|-------|------------------------------------------------------------------------------------------------------------------|-------|------|----------|----------|-----|
| TLR7     | 51284 | toll-like receptor 7 (TLR7), mRNA.                                                                               | 0.23  | 6.52 | 7.40E-27 | 4.31E-26 | red |
| TM2D3    | 80213 | TM2 domain containing 3 (TM2D3), transcript variant 2, mRNA.                                                     | -0.05 | 8.18 | 5.18E-03 | 7.60E-03 | red |
| TM9SF2   | 9375  | transmembrane 9 superfamily member 2 (TM9SF2), mRNA.                                                             | -0.02 | 7.44 | 1.58E-01 | 1.91E-01 | red |
| TMEM140  | 55281 | transmembrane protein 140 (TMEM140), mRNA.                                                                       | -0.07 | 7.76 | 1.59E-05 | 2.97E-05 | red |
| TMEM237  | 65062 | amyotrophic lateral sclerosis 2 (juvenile) chromosome region, candidate 4 (ALS2CR4), transcript variant 2, mRNA. | 0.01  | 7.41 | 4.71E-01 | 5.17E-01 | red |
| TMEM8B   | 51754 | chromosome 9 open reading frame 127 (C9orf127), transcript variant 3, mRNA.                                      | 0.18  | 7.96 | 5.11E-26 | 2.88E-25 | red |
| TNFSF10  | 8743  | tumor necrosis factor (ligand) superfamily, member 10 (TNFSF10), mRNA.                                           | -0.01 | 7.17 | 4.85E-01 | 5.30E-01 | red |
| TP53INP1 | 94241 | tumor protein p53 inducible nuclear protein 1 (TP53INP1), mRNA.                                                  | 0.11  | 6.00 | 4.60E-10 | 1.16E-09 | red |
| TRA2B    | 6434  | splicing factor, arginine/serine-rich 10 (transformer 2 homolog, Drosophila) (SFRS10), mRNA.                     | 0.06  | 5.93 | 9.65E-05 | 1.68E-04 | red |
| TRAM2    | 9697  | translocation associated membrane protein 2 (TRAM2), mRNA.                                                       | 0.01  | 7.87 | 1.99E-01 | 2.37E-01 | red |

|        |        |                                                                                                     |       |      |           |           |     |
|--------|--------|-----------------------------------------------------------------------------------------------------|-------|------|-----------|-----------|-----|
| TRERF1 | 55809  | transcriptional regulating factor 1 (TRERF1), mRNA.                                                 | -0.02 | 7.17 | 2.56E-01  | 2.98E-01  | red |
| TRIM69 | 140691 | tripartite motif-containing 69 (TRIM69), transcript variant a, mRNA.                                | -0.03 | 6.49 | 5.05E-02  | 6.59E-02  | red |
| TST    | 7263   | thiosulfate sulfurtransferase (rhodanese) (TST), nuclear gene encoding mitochondrial protein, mRNA. | -0.14 | 6.99 | 4.56E-18  | 1.78E-17  | red |
| TUBB2A | Na     | tubulin, beta polypeptide (TUBB), mRNA.                                                             | 2.90  | 9.15 | 8.82E-140 | 4.48E-136 | red |
| TUBB2B | 347733 | tubulin, beta 2B (TUBB2B), mRNA.                                                                    | 0.17  | 9.67 | 3.52E-24  | 1.84E-23  | red |
| UBE2E1 | 7324   | ubiquitin-conjugating enzyme E2E 1 (UBC4/5 homolog, yeast) (UBE2E1), transcript variant 2, mRNA.    | -0.01 | 7.81 | 6.53E-01  | 6.91E-01  | red |
| UBE2F  | 140739 | ubiquitin-conjugating enzyme E2F (putative) (UBE2F), mRNA.                                          | 0.03  | 8.16 | 2.33E-02  | 3.17E-02  | red |
| UCHL1  | 7345   | ubiquitin carboxyl-terminal esterase L1 (ubiquitin thiolesterase) (UCHL1), mRNA.                    | 0.04  | 8.47 | 2.39E-03  | 3.63E-03  | red |
| UFSP2  | 55325  | chromosome 4 open reading frame 20 (C4orf20), mRNA.                                                 | 0.04  | 9.65 | 1.97E-03  | 3.02E-03  | red |
| UHRF1  | 29128  | ubiquitin-like, containing PHD and RING finger domains, 1 (UHRF1), transcript variant 1, mRNA.      | 0.02  | 7.51 | 1.58E-01  | 1.92E-01  | red |

|          |        |                                                                         |       |      |          |          |     |
|----------|--------|-------------------------------------------------------------------------|-------|------|----------|----------|-----|
| VKORC1L1 | 154807 | vitamin K epoxide reductase complex, subunit 1-like 1 (VKORC1L1), mRNA. | -0.01 | 7.09 | 5.36E-01 | 5.81E-01 | red |
| VPREB3   | 29802  | pre-B lymphocyte gene 3 (VPREB3), mRNA.                                 | -0.18 | 7.30 | 1.41E-14 | 4.59E-14 | red |
| WBP5     | 51186  | WW domain binding protein 5 (WBP5), transcript variant 4, mRNA.         | -0.17 | 9.20 | 4.94E-25 | 2.68E-24 | red |
| WDFY1    | 57590  | WD repeat and FYVE domain containing 1 (WDFY1), mRNA.                   | -0.26 | 7.21 | 1.09E-27 | 6.59E-27 | red |
| WNT10A   | 80326  | wingless-type MMTV integration site family, member 10A (WNT10A), mRNA.  | 0.59  | 6.99 | 3.11E-55 | 6.29E-54 | red |
| XAF1     | 54739  | XIAP associated factor-1 (XAF1), transcript variant 1, mRNA.            | -0.06 | 7.24 | 9.43E-05 | 1.65E-04 | red |
| XPNPEP1  | 7511   | X-prolyl aminopeptidase (aminopeptidase P) 1, soluble (XPNPEP1), mRNA.  | -0.27 | 7.42 | 3.42E-36 | 2.91E-35 | red |
| ZBTB32   | 27033  | zinc finger and BTB domain containing 32 (ZBTB32), mRNA.                | -0.07 | 7.05 | 4.42E-06 | 8.62E-06 | red |
| ZC2HC1A  | 51101  | chromosome 8 open reading frame 70 (C8orf70), mRNA.                     | -0.02 | 5.46 | 2.16E-01 | 2.55E-01 | red |
| ZNF22    | 7570   | zinc finger protein 22 (KOX15) (ZNF22), mRNA.                           | 0.02  | 8.87 | 4.06E-01 | 4.51E-01 | red |
| ZNF362   | 149076 | FLJ25476 protein (FLJ25476), mRNA.                                      | -0.18 | 8.27 | 8.20E-21 | 3.63E-20 | red |
| ZYX      | 7791   | zyxin (ZYX), transcript variant 2, mRNA.                                | -0.12 | 8.91 | 7.35E-14 | 2.29E-13 | red |

|          |        |                                                                                       |       |      |          |          |        |
|----------|--------|---------------------------------------------------------------------------------------|-------|------|----------|----------|--------|
| ACTL6A   | 86     | actin-like 6A (ACTL6A), transcript variant 3, mRNA.                                   | 0.06  | 6.63 | 5.10E-04 | 8.33E-04 | salmon |
| ADNP2    | 22850  | zinc finger protein 508 (ZNF508), mRNA.                                               | 0.02  | 7.59 | 8.37E-02 | 1.06E-01 | salmon |
| AKIP1    | 56672  | chromosome 11 open reading frame 17 (C11orf17), transcript variant 1, mRNA.           | 0.04  | 8.73 | 1.15E-03 | 1.80E-03 | salmon |
| ANKRD13C | 81573  | ankyrin repeat domain 13C (ANKRD13C), mRNA.                                           | 0.16  | 8.83 | 1.22E-20 | 5.38E-20 | salmon |
| ANKRD46  | 157567 | ankyrin repeat domain 46 (ANKRD46), mRNA.                                             | 0.08  | 9.17 | 9.19E-11 | 2.41E-10 | salmon |
| AP3M1    | 26985  | adaptor-related protein complex 3, mu 1 subunit (AP3M1), transcript variant 1, mRNA.  | -0.26 | 5.88 | 4.68E-38 | 4.38E-37 | salmon |
| APOBEC3H | 164668 | apolipoprotein B mRNA editing enzyme, catalytic polypeptide-like 3H (APOBEC3H), mRNA. | -0.29 | 7.66 | 1.11E-41 | 1.20E-40 | salmon |
| ARL6IP1  | 23204  | ADP-ribosylation factor-like 6 interacting protein 1 (ARL6IP1), mRNA.                 | 0.11  | 7.25 | 9.72E-12 | 2.70E-11 | salmon |
| ASF1B    | 55723  | ASF1 anti-silencing function 1 homolog B (S. cerevisiae) (ASF1B), mRNA.               | -0.16 | 6.41 | 2.19E-16 | 7.80E-16 | salmon |
| ATAD1    | 84896  | ATPase family, AAA domain containing 1 (ATAD1), mRNA.                                 | 0.88  | 7.93 | 2.30E-71 | 1.11E-69 | salmon |

|         |       |                                                                                         |       |      |          |          |        |
|---------|-------|-----------------------------------------------------------------------------------------|-------|------|----------|----------|--------|
| BAZ1A   | 11177 | bromodomain adjacent to zinc finger domain, 1A (BAZ1A), transcript variant 2, mRNA.     | -0.06 | 6.14 | 8.56E-05 | 1.50E-04 | salmon |
| CARHSP1 | 23589 | calcium regulated heat stable protein 1, 24kDa (CARHSP1), transcript variant 2, mRNA.   | 0.00  | 9.01 | 7.62E-01 | 7.92E-01 | salmon |
| CBX3    | 11335 | chromobox homolog 3 (HP1 gamma homolog, Drosophila) (CBX3), transcript variant 2, mRNA. | -0.02 | 8.37 | 2.28E-01 | 2.68E-01 | salmon |
| CCDC69  | 26112 | coiled-coil domain containing 69 (CCDC69), mRNA.                                        | -0.38 | 7.87 | 3.27E-57 | 7.52E-56 | salmon |
| CCT8    | 10694 | chaperonin containing TCP1, subunit 8 (theta) (CCT8), mRNA.                             | -0.10 | 8.06 | 4.26E-09 | 1.02E-08 | salmon |
| CD63    | 967   | CD63 antigen (melanoma 1 antigen) (CD63), mRNA.                                         | 0.05  | 6.63 | 1.22E-03 | 1.92E-03 | salmon |
| CDK9    | 1025  | cyclin-dependent kinase 9 (CDC2-related kinase) (CDK9), mRNA.                           | -0.06 | 7.91 | 1.40E-06 | 2.83E-06 | salmon |
| CENPK   | 64105 | centromere protein K (CENPK), mRNA.                                                     | -0.08 | 8.23 | 1.87E-05 | 3.48E-05 | salmon |
| CEPT1   | 10390 | choline/ethanolamine phosphotransferase 1 (CEPT1), transcript variant 1, mRNA.          | -0.17 | 8.60 | 1.28E-27 | 7.72E-27 | salmon |
| CES2    | 8824  | carboxylesterase 2 (intestine, liver) (CES2), transcript variant 2, mRNA.               | -0.13 | 8.94 | 8.70E-16 | 3.01E-15 | salmon |



|         |       |                                                                                                              |       |      |          |          |        |
|---------|-------|--------------------------------------------------------------------------------------------------------------|-------|------|----------|----------|--------|
| CHCHD6  | 84303 | coiled-coil-helix-coiled-coil-helix domain containing 6 (CHCHD6), mRNA.                                      | -0.02 | 8.51 | 1.41E-01 | 1.72E-01 | salmon |
| CHORDC1 | 26973 | cysteine and histidine-rich domain (CHORD)-containing 1 (CHORDC1), mRNA.                                     | 0.02  | 8.09 | 5.63E-02 | 7.29E-02 | salmon |
| CHST2   | 9435  | carbohydrate (N-acetylglucosamine-6-O) sulfotransferase 2 (CHST2), mRNA.                                     | 0.02  | 6.00 | 2.94E-01 | 3.38E-01 | salmon |
| CLK1    | 1195  | CDC-like kinase 1 (CLK1), transcript variant 1, mRNA.                                                        | 0.14  | 9.86 | 3.93E-25 | 2.14E-24 | salmon |
| CNBP    | 7555  | CCHC-type zinc finger, nucleic acid binding protein (CNBP), mRNA.                                            | -0.01 | 7.73 | 5.96E-01 | 6.38E-01 | salmon |
| CNOT7   | 29883 | CCR4-NOT transcription complex, subunit 7 (CNOT7), transcript variant 1, mRNA.                               | 0.15  | 8.48 | 1.24E-09 | 3.05E-09 | salmon |
| COMMD3  | 23412 | COMM domain containing 3 (COMMD3), mRNA.                                                                     | -0.16 | 8.35 | 7.65E-19 | 3.09E-18 | salmon |
| CRAT    | 1384  | carnitine acetyltransferase (CRAT), nuclear gene encoding mitochondrial protein, transcript variant 1, mRNA. | -0.07 | 9.58 | 8.79E-07 | 1.80E-06 | salmon |
| CREBBP  | 1387  | CREB binding protein (Rubinstein-Taybi syndrome) (CREBBP), transcript variant 2, mRNA.                       | -0.01 | 6.01 | 7.69E-01 | 7.98E-01 | salmon |
| CRIP1   | 1396  | cysteine-rich protein 1 (intestinal) (CRIP1), mRNA.                                                          | -0.06 | 5.49 | 8.74E-05 | 1.53E-04 | salmon |

|           |        |                                                                                        |       |       |          |          |        |
|-----------|--------|----------------------------------------------------------------------------------------|-------|-------|----------|----------|--------|
| CTPS1     | 1503   | CTP synthase (CTPS), mRNA.                                                             | 0.02  | 9.47  | 1.25E-01 | 1.54E-01 | salmon |
| CUEDC2    | 79004  | CUE domain containing 2 (CUEDC2), mRNA.                                                | 0.04  | 7.18  | 3.59E-02 | 4.77E-02 | salmon |
| CUTA      | 51596  | cutA divalent cation tolerance homolog (E. coli) (CUTA), transcript variant 3, mRNA.   | 0.13  | 10.43 | 9.53E-11 | 2.49E-10 | salmon |
| DDX21     | 9188   | DEAD (Asp-Glu-Ala-Asp) box polypeptide 21 (DDX21), mRNA.                               | 0.06  | 5.63  | 1.01E-05 | 1.92E-05 | salmon |
| DDX3X     | 1654   | DEAD (Asp-Glu-Ala-Asp) box polypeptide 3, X-linked (DDX3X), mRNA.                      | -0.02 | 10.06 | 3.03E-01 | 3.47E-01 | salmon |
| DEK       | 7913   | DEK oncogene (DNA binding) (DEK), mRNA.                                                | -0.28 | 6.80  | 1.14E-44 | 1.43E-43 | salmon |
| DEXI      | 28955  | dexamethasone-induced transcript (DEXI), mRNA.                                         | 0.05  | 8.19  | 3.59E-05 | 6.51E-05 | salmon |
| DKC1      | 1736   | dyskeratosis congenita 1, dyskerin (DKC1), mRNA.                                       | 0.24  | 6.32  | 9.09E-34 | 6.86E-33 | salmon |
| DUSP28    | 285193 | dual specificity phosphatase 28 (DUSP28), mRNA.                                        | -0.06 | 7.86  | 7.81E-05 | 1.38E-04 | salmon |
| EDARADD   | 128178 | EDAR-associated death domain (EDARADD), transcript variant B, mRNA.                    | -0.06 | 6.32  | 5.83E-03 | 8.50E-03 | salmon |
| EDRF1     | 26098  | chromosome 10 open reading frame 137 (C10orf137), mRNA.                                | -0.02 | 11.04 | 2.45E-01 | 2.86E-01 | salmon |
| EIF4ENIF1 | 56478  | eukaryotic translation initiation factor 4E nuclear import factor 1 (EIF4ENIF1), mRNA. | -0.01 | 8.20  | 3.15E-01 | 3.59E-01 | salmon |

|         |       |                                                                                                                                       |       |       |          |          |        |
|---------|-------|---------------------------------------------------------------------------------------------------------------------------------------|-------|-------|----------|----------|--------|
| ELMSAN1 | 91748 | chromosome 14 open reading frame 43 (C14orf43), transcript variant 2, mRNA.                                                           | 0.03  | 7.85  | 7.53E-03 | 1.09E-02 | salmon |
| F8A1    | 8263  | coagulation factor VIII-associated (intronic transcript) 1 (F8A1), mRNA.                                                              | -0.01 | 8.12  | 2.22E-01 | 2.62E-01 | salmon |
| FAM3A   | 60343 | family with sequence similarity 3, member A (FAM3A), mRNA.                                                                            | 0.01  | 11.07 | 7.16E-01 | 7.49E-01 | salmon |
| FASTKD1 | 79675 | FAST kinase domains 1 (FASTKD1), mRNA.                                                                                                | -0.07 | 7.01  | 7.88E-04 | 1.26E-03 | salmon |
| FOXRED1 | 55572 | FAD-dependent oxidoreductase domain containing 1 (FOXRED1), mRNA.                                                                     | -0.04 | 9.25  | 6.72E-03 | 9.77E-03 | salmon |
| FXVD5   | 53827 | FXVD domain containing ion transport regulator 5 (FXVD5), transcript variant 1, mRNA.                                                 | -0.13 | 8.24  | 6.32E-13 | 1.87E-12 | salmon |
| GAMT    | 2593  | guanidinoacetate N-methyltransferase (GAMT), transcript variant 1, mRNA.                                                              | 0.05  | 9.24  | 2.06E-03 | 3.16E-03 | salmon |
| GBE1    | 2632  | glucan (1,4-alpha-), branching enzyme 1 (glycogen branching enzyme, Andersen disease, glycogen storage disease type IV) (GBE1), mRNA. | 0.01  | 8.81  | 2.18E-01 | 2.57E-01 | salmon |
| GFPT1   | 2673  | glutamine-fructose-6-phosphate transaminase 1 (GFPT1), mRNA.                                                                          | 0.16  | 9.10  | 4.08E-16 | 1.43E-15 | salmon |
| GLG1    | 2734  | golgi apparatus protein 1 (GLG1), mRNA.                                                                                               | 0.03  | 8.39  | 3.05E-02 | 4.08E-02 | salmon |

|          |        |                                                                                                      |       |       |          |          |        |
|----------|--------|------------------------------------------------------------------------------------------------------|-------|-------|----------|----------|--------|
| GMFB     | 2764   | glia maturation factor, beta (GMFB), mRNA.                                                           | -0.05 | 6.39  | 1.11E-03 | 1.75E-03 | salmon |
| GSKIP    | 51527  | chromosome 14 open reading frame 129 (C14orf129), mRNA.                                              | -0.10 | 8.49  | 1.43E-10 | 3.70E-10 | salmon |
| HAGH     | 3029   | hydroxyacylglutathione hydrolase (HAGH), transcript variant 2, mRNA.                                 | 0.04  | 5.61  | 3.30E-02 | 4.40E-02 | salmon |
| HCST     | 10870  | hematopoietic cell signal transducer (HCST), transcript variant 2, mRNA.                             | 0.17  | 8.53  | 1.20E-14 | 3.90E-14 | salmon |
| HIATL1   | 84641  | hippocampus abundant transcript-like 1 (HIATL1), mRNA.                                               | -0.06 | 8.92  | 2.37E-05 | 4.38E-05 | salmon |
| HMGCL    | 3155   | 3-hydroxymethyl-3-methylglutaryl-Coenzyme A lyase (hydroxymethylglutaricaciduria) (HMGCL), mRNA.     | -0.14 | 8.26  | 5.09E-20 | 2.18E-19 | salmon |
| HRASLS2  | 54979  | HRAS-like suppressor 2 (HRASLS2), mRNA.                                                              | 0.01  | 10.30 | 7.44E-01 | 7.74E-01 | salmon |
| HSP90AA1 | 3320   | heat shock protein 90kDa alpha (cytosolic), class A member 1 (HSP90AA1), transcript variant 2, mRNA. | -0.15 | 7.96  | 1.90E-18 | 7.54E-18 | salmon |
| HYLS1    | 219844 | hydroletharus syndrome 1 (HYLS1), mRNA.                                                              | -0.05 | 8.89  | 3.03E-04 | 5.05E-04 | salmon |
| ICAM3    | 3385   | intercellular adhesion molecule 3 (ICAM3), mRNA.                                                     | -0.08 | 6.21  | 3.02E-08 | 6.81E-08 | salmon |
| KCTD10   | 83892  | potassium channel tetramerisation domain containing 10 (KCTD10), mRNA.                               | -0.11 | 5.47  | 7.88E-09 | 1.85E-08 | salmon |

|           |        |                                                                                   |       |       |          |          |        |
|-----------|--------|-----------------------------------------------------------------------------------|-------|-------|----------|----------|--------|
| KDM6A     | 7403   | ubiquitously transcribed tetratricopeptide repeat, X chromosome (UTX), mRNA.      | 1.36  | 6.03  | 1.20E-71 | 5.85E-70 | salmon |
| KLHDC3    | 116138 | kelch domain containing 3 (KLHDC3), mRNA.                                         | -0.10 | 6.08  | 2.11E-06 | 4.21E-06 | salmon |
| KLHDC4    | 54758  | kelch domain containing 4 (KLHDC4), mRNA.                                         | 0.07  | 6.78  | 3.71E-04 | 6.14E-04 | salmon |
| LAMP2     | 3920   | lysosomal-associated membrane protein 2 (LAMP2), transcript variant LAMP2B, mRNA. | -0.05 | 8.16  | 9.53E-04 | 1.51E-03 | salmon |
| LARP7     | 51574  | La ribonucleoprotein domain family, member 7 (LARP7), transcript variant 1, mRNA. | 0.05  | 5.95  | 1.91E-03 | 2.93E-03 | salmon |
| LCMT1     | 51451  | leucine carboxyl methyltransferase 1 (LCMT1), transcript variant 1, mRNA.         | -0.11 | 7.21  | 8.72E-11 | 2.29E-10 | salmon |
| LGALS1    | 3956   | lectin, galactoside-binding, soluble, 1 (galectin 1) (LGALS1), mRNA.              | -0.08 | 9.45  | 7.79E-08 | 1.71E-07 | salmon |
| LINC00467 | 84791  | chromosome 1 open reading frame 97 (C1orf97), mRNA.                               | 0.14  | 8.35  | 2.78E-10 | 7.10E-10 | salmon |
| MAPK3     | 5595   | mitogen-activated protein kinase 3 (MAPK3), transcript variant 1, mRNA.           | 0.00  | 12.06 | 8.81E-01 | 8.99E-01 | salmon |

|        |        |                                                                                                            |       |      |          |          |        |
|--------|--------|------------------------------------------------------------------------------------------------------------|-------|------|----------|----------|--------|
| MARS2  | 92935  | methionyl-tRNA synthetase 2, mitochondrial (MARS2), nuclear gene encoding mitochondrial protein, mRNA.     | -0.22 | 7.39 | 1.52E-25 | 8.44E-25 | salmon |
| MCEE   | 84693  | methylmalonyl CoA epimerase (MCEE), mRNA.                                                                  | 0.09  | 7.22 | 9.91E-06 | 1.89E-05 | salmon |
| MRPS27 | 23107  | mitochondrial ribosomal protein S27 (MRPS27), nuclear gene encoding mitochondrial protein, mRNA.           | 0.10  | 6.67 | 4.75E-11 | 1.26E-10 | salmon |
| MTERF3 | 51001  | MTERF domain containing 1 (MTERFD1), mRNA.                                                                 | 0.02  | 6.52 | 1.18E-01 | 1.46E-01 | salmon |
| MYADM  | 91663  | myeloid-associated differentiation marker (MYADM), transcript variant 4, mRNA.                             | 0.60  | 6.00 | 8.73E-55 | 1.71E-53 | salmon |
| MYL6B  | 140465 | myosin, light chain 6B, alkali, smooth muscle and non-muscle (MYL6B), mRNA.                                | 0.11  | 7.17 | 2.83E-10 | 7.22E-10 | salmon |
| NA     | 445329 | sulfotransferase family, cytosolic, 1A, phenol-preferring, member 4 (SULT1A4), transcript variant 1, mRNA. | -0.25 | 6.99 | 2.12E-34 | 1.65E-33 | salmon |
| NA     | 79897  | ribonuclease P 21kDa subunit (RPP21), mRNA.                                                                | 0.11  | 6.73 | 4.24E-09 | 1.01E-08 | salmon |
| NA     | 117584 | ring finger and FYVE-like domain containing 1 (RFFL), transcript variant 2, mRNA.                          | 0.03  | 9.29 | 1.32E-03 | 2.07E-03 | salmon |

|         |        |                                                                                                   |       |       |          |          |        |
|---------|--------|---------------------------------------------------------------------------------------------------|-------|-------|----------|----------|--------|
| NACC2   | 138151 | BTB (POZ) domain containing 14A (BTBD14A), mRNA.                                                  | 0.00  | 5.75  | 7.68E-01 | 7.97E-01 | salmon |
| NAPRT   | 93100  | nicotinate phosphoribosyltransferase domain containing 1 (NAPRT1), mRNA.                          | -0.11 | 5.91  | 3.41E-11 | 9.17E-11 | salmon |
| NDUFB10 | 4716   | NADH dehydrogenase (ubiquinone) 1 beta subcomplex, 10, 22kDa (NDUFB10), mRNA.                     | 0.00  | 9.16  | 8.57E-01 | 8.78E-01 | salmon |
| NIFK    | 84365  | MKI67 (FHA domain) interacting nucleolar phosphoprotein (MKI67IP), mRNA.                          | 0.02  | 8.32  | 1.60E-01 | 1.94E-01 | salmon |
| NINJ2   | 4815   | ninjurin 2 (NINJ2), mRNA.                                                                         | 0.06  | 7.26  | 2.95E-06 | 5.82E-06 | salmon |
| NMRK1   | 54981  | chromosome 9 open reading frame 95 (C9orf95), mRNA.                                               | -0.17 | 10.71 | 1.22E-29 | 7.79E-29 | salmon |
| NOP56   | 10528  | nucleolar protein 5A (56kDa with KKE/D repeat) (NOL5A), mRNA.                                     | -0.02 | 10.29 | 1.77E-01 | 2.12E-01 | salmon |
| NOP58   | 51602  | nucleolar protein NOP5/NOP58 (NOP5/NOP58), mRNA.                                                  | 0.09  | 7.94  | 4.03E-04 | 6.65E-04 | salmon |
| NPRL2   | 10641  | tumor suppressor candidate 4 (TUSC4), mRNA.                                                       | 0.12  | 8.94  | 2.27E-18 | 8.93E-18 | salmon |
| NSMCE1  | 197370 | non-SMC element 1 homolog (S. cerevisiae) (NSMCE1), mRNA.                                         | 0.15  | 6.85  | 1.96E-15 | 6.61E-15 | salmon |
| NUDT1   | 4521   | nudix (nucleoside diphosphate linked moiety X)-type motif 1 (NUDT1), transcript variant 3B, mRNA. | 0.06  | 10.69 | 1.13E-05 | 2.15E-05 | salmon |

|         |        |                                                                                              |       |       |          |          |        |
|---------|--------|----------------------------------------------------------------------------------------------|-------|-------|----------|----------|--------|
| NUDT18  | 79873  | nudix (nucleoside diphosphate linked moiety X)-type motif 18 (NUDT18), mRNA.                 | -0.02 | 7.70  | 1.82E-01 | 2.18E-01 | salmon |
| NUP107  | 57122  | nucleoporin 107kDa (NUP107), mRNA.                                                           | 0.00  | 6.23  | 9.98E-01 | 9.98E-01 | salmon |
| NUP153  | 9972   | nucleoporin 153kDa (NUP153), mRNA.                                                           | 0.12  | 5.53  | 1.90E-12 | 5.46E-12 | salmon |
| NUP205  | 23165  | nucleoporin 205kDa (NUP205), mRNA.                                                           | -0.24 | 10.01 | 1.48E-30 | 9.76E-30 | salmon |
| ODC1    | 4953   | ornithine decarboxylase 1 (ODC1), mRNA.                                                      | 0.07  | 6.24  | 4.10E-04 | 6.76E-04 | salmon |
| OMA1    | 115209 | OMA1 homolog, zinc metallopeptidase ( <i>S. cerevisiae</i> ) (OMA1), mRNA.                   | 0.27  | 6.34  | 5.11E-35 | 4.09E-34 | salmon |
| OTUD4   | 54726  | OTU domain containing 4 (OTUD4), transcript variant 1, mRNA.                                 | -0.08 | 9.52  | 3.87E-08 | 8.65E-08 | salmon |
| PAPD4   | 167153 | PAP associated domain containing 4 (PAPD4), mRNA.                                            | -0.22 | 5.99  | 1.22E-23 | 6.20E-23 | salmon |
| PGRMC2  | 10424  | progesterone receptor membrane component 2 (PGRMC2), mRNA.                                   | 0.14  | 5.77  | 6.68E-11 | 1.77E-10 | salmon |
| PIGN    | 23556  | phosphatidylinositol glycan anchor biosynthesis, class N (PIGN), transcript variant 2, mRNA. | -0.15 | 7.00  | 1.94E-18 | 7.66E-18 | salmon |
| PLA2G4A | 5321   | phospholipase A2, group IVA (cytosolic, calcium-dependent) (PLA2G4A), mRNA.                  | 0.04  | 8.22  | 8.99E-03 | 1.29E-02 | salmon |



|         |       |                                                                                                                                   |       |       |          |          |        |
|---------|-------|-----------------------------------------------------------------------------------------------------------------------------------|-------|-------|----------|----------|--------|
| PNISR   | 25957 | chromosome 6 open reading frame 111 (C6orf111), mRNA.                                                                             | -0.04 | 7.04  | 8.43E-05 | 1.48E-04 | salmon |
| PNN     | 5411  | pinin, desmosome associated protein (PNN), mRNA.                                                                                  | -0.08 | 6.23  | 2.68E-08 | 6.06E-08 | salmon |
| POLR2J  | 5439  | polymerase (RNA) II (DNA directed) polypeptide J, 13.3kDa (POLR2J), mRNA.                                                         | -0.75 | 6.97  | 4.18E-58 | 1.01E-56 | salmon |
| POLR3B  | 55703 | polymerase (RNA) III (DNA directed) polypeptide B (POLR3B), mRNA.                                                                 | -0.03 | 11.88 | 1.46E-02 | 2.04E-02 | salmon |
| POLR3GL | 84265 | polymerase (RNA) III (DNA directed) polypeptide G (32kD)-like (POLR3GL), mRNA.                                                    | -0.04 | 8.66  | 4.60E-03 | 6.79E-03 | salmon |
| PPIG    | 9360  | peptidylprolyl isomerase G (cyclophilin G) (PPIG), mRNA.                                                                          | 0.01  | 11.83 | 6.79E-01 | 7.14E-01 | salmon |
| PPP1CC  | 5501  | protein phosphatase 1, catalytic subunit, gamma isoform (PPP1CC), mRNA.                                                           | 0.13  | 8.42  | 7.29E-14 | 2.28E-13 | salmon |
| PPP4C   | 5531  | protein phosphatase 4 (formerly X), catalytic subunit (PPP4C), mRNA.                                                              | 0.06  | 8.35  | 6.09E-04 | 9.87E-04 | salmon |
| PRKAR1A | 5573  | protein kinase, cAMP-dependent, regulatory, type I, alpha (tissue specific extinguisher 1) (PRKAR1A), transcript variant 3, mRNA. | -0.07 | 8.54  | 3.25E-05 | 5.91E-05 | salmon |
| PSMC6   | 5706  | proteasome (prosome, macropain) 26S subunit, ATPase, 6 (PSMC6), mRNA.                                                             | 0.87  | 8.15  | 7.87E-65 | 2.83E-63 | salmon |

|         |        |                                                                                                           |       |      |          |          |        |
|---------|--------|-----------------------------------------------------------------------------------------------------------|-------|------|----------|----------|--------|
| PSMD10  | 5716   | proteasome (prosome, macropain) 26S subunit, non-ATPase, 10 (PSMD10), transcript variant 2, mRNA.         | -0.02 | 9.83 | 5.51E-02 | 7.15E-02 | salmon |
| PSME3   | 10197  | proteasome (prosome, macropain) activator subunit 3 (PA28 gamma; Ki) (PSME3), transcript variant 2, mRNA. | 0.01  | 7.66 | 4.72E-01 | 5.17E-01 | salmon |
| PSRC1   | 84722  | proline/serine-rich coiled-coil 1 (PSRC1), transcript variant 1, mRNA.                                    | 0.27  | 6.79 | 1.95E-32 | 1.41E-31 | salmon |
| PTPN12  | 5782   | protein tyrosine phosphatase, non-receptor type 12 (PTPN12), mRNA.                                        | -0.15 | 8.76 | 2.57E-16 | 9.15E-16 | salmon |
| RABEP1  | 9135   | rabaptin, RAB GTPase binding effector protein 1 (RABEP1), mRNA.                                           | -0.08 | 8.21 | 1.00E-08 | 2.33E-08 | salmon |
| RINL    | 126432 | FLJ45909 protein (FLJ45909), mRNA.                                                                        | 0.02  | 6.15 | 2.33E-01 | 2.73E-01 | salmon |
| RNF113A | 7737   | ring finger protein 113A (RNF113A), mRNA.                                                                 | -0.02 | 8.31 | 1.63E-01 | 1.96E-01 | salmon |
| RNF145  | 153830 | hypothetical protein FLJ31951 (FLJ31951), mRNA.                                                           | -0.08 | 5.84 | 1.21E-08 | 2.81E-08 | salmon |
| RPS29   | 731786 | PREDICTED: similar to 60S ribosomal protein L32 (LOC731786), mRNA.                                        | 0.11  | 7.51 | 9.52E-09 | 2.22E-08 | salmon |
| RRAS    | 6237   | related RAS viral (r-ras) oncogene homolog (RRAS), mRNA.                                                  | -0.02 | 6.63 | 9.76E-02 | 1.22E-01 | salmon |

|          |        |                                                                                                                                                            |       |      |          |          |        |
|----------|--------|------------------------------------------------------------------------------------------------------------------------------------------------------------|-------|------|----------|----------|--------|
| RWDD2A   | 112611 | RWD domain containing 2 (RWDD2), mRNA.                                                                                                                     | -0.08 | 6.33 | 3.54E-08 | 7.94E-08 | salmon |
| SEC22A   | 26984  | SEC22 vesicle trafficking protein homolog A (S. cerevisiae) (SEC22A), mRNA.                                                                                | -0.03 | 9.30 | 4.77E-02 | 6.23E-02 | salmon |
| SEPW1    | 6415   | selenoprotein W, 1 (SEPW1), mRNA.                                                                                                                          | -0.04 | 6.06 | 2.01E-02 | 2.75E-02 | salmon |
| SLC20A1  | 6574   | solute carrier family 20 (phosphate transporter), member 1 (SLC20A1), mRNA.                                                                                | 0.20  | 7.52 | 1.41E-31 | 9.80E-31 | salmon |
| SLC25A14 | 9016   | solute carrier family 25 (mitochondrial carrier, brain), member 14 (SLC25A14), nuclear gene encoding mitochondrial protein, transcript variant long, mRNA. | -0.05 | 8.05 | 1.22E-04 | 2.10E-04 | salmon |
| SLC27A3  | 11000  | solute carrier family 27 (fatty acid transporter), member 3 (SLC27A3), mRNA.                                                                               | -0.07 | 7.90 | 1.01E-08 | 2.34E-08 | salmon |
| SNRPA1   | 6627   | small nuclear ribonucleoprotein polypeptide A' (SNRPA1), mRNA.                                                                                             | 0.11  | 9.98 | 8.71E-10 | 2.16E-09 | salmon |
| SOCS4    | 122809 | suppressor of cytokine signaling 4 (SOCS4), transcript variant 1, mRNA.                                                                                    | 0.10  | 8.49 | 2.11E-12 | 6.07E-12 | salmon |
| SQRDL    | 58472  | sulfide quinone reductase-like (yeast) (SQRDL), mRNA.                                                                                                      | 0.24  | 8.69 | 7.34E-38 | 6.84E-37 | salmon |

|          |        |                                                                                                |       |       |          |          |        |
|----------|--------|------------------------------------------------------------------------------------------------|-------|-------|----------|----------|--------|
| SSB      | 6741   | Sjogren syndrome antigen B (autoantigen La) (SSB), mRNA.                                       | -0.17 | 8.59  | 3.47E-32 | 2.48E-31 | salmon |
| SURF1    | 6834   | surfeit 1 (SURF1), nuclear gene encoding mitochondrial protein, mRNA.                          | -0.32 | 6.03  | 4.39E-44 | 5.35E-43 | salmon |
| TAF1B    | 9014   | TATA box binding protein (TBP)-associated factor, RNA polymerase I, B, 63kDa (TAF1B), mRNA.    | 0.26  | 9.13  | 3.38E-37 | 3.01E-36 | salmon |
| TAF2     | 6873   | TAF2 RNA polymerase II, TATA box binding protein (TBP)-associated factor, 150kDa (TAF2), mRNA. | -0.21 | 10.24 | 1.63E-16 | 5.87E-16 | salmon |
| TAF7     | 6879   | TAF7 RNA polymerase II, TATA box binding protein (TBP)-associated factor, 55kDa (TAF7), mRNA.  | -0.04 | 8.44  | 3.66E-03 | 5.46E-03 | salmon |
| TCEA2    | 6919   | transcription elongation factor A (SII), 2 (TCEA2), transcript variant 1, mRNA.                | 0.26  | 9.62  | 5.18E-41 | 5.42E-40 | salmon |
| TFB2M    | 64216  | transcription factor B2, mitochondrial (TFB2M), mRNA.                                          | 0.05  | 7.85  | 9.18E-02 | 1.16E-01 | salmon |
| TLN1     | 7094   | talin 1 (TLN1), mRNA.                                                                          | -0.15 | 7.02  | 8.25E-16 | 2.86E-15 | salmon |
| TM7SF2   | 7108   | transmembrane 7 superfamily member 2 (TM7SF2), mRNA.                                           | -0.17 | 7.63  | 5.63E-19 | 2.30E-18 | salmon |
| TMEM179B | 374395 | similar to RIKEN cDNA 1810059G22 (LOC374395), mRNA.                                            | -0.08 | 6.80  | 5.70E-06 | 1.10E-05 | salmon |

|          |        |                                                                                      |       |       |          |          |        |
|----------|--------|--------------------------------------------------------------------------------------|-------|-------|----------|----------|--------|
| TRAPPC2L | 51693  | trafficking protein particle complex 2-like (TRAPPC2L), mRNA.                        | -0.05 | 6.13  | 3.01E-04 | 5.03E-04 | salmon |
| TRAPPC6A | 79090  | trafficking protein particle complex 6A (TRAPPC6A), mRNA.                            | -0.03 | 8.91  | 5.20E-02 | 6.76E-02 | salmon |
| TSPAN4   | 7106   | tetraspanin 4 (TSPAN4), transcript variant 4, mRNA.                                  | -0.12 | 9.32  | 6.08E-09 | 1.44E-08 | salmon |
| UBLCP1   | 134510 | ubiquitin-like domain containing CTD phosphatase 1 (UBLCP1), mRNA.                   | 0.07  | 9.30  | 3.88E-09 | 9.29E-09 | salmon |
| VAMP8    | 8673   | vesicle-associated membrane protein 8 (endobrevin) (VAMP8), mRNA.                    | -0.09 | 8.21  | 1.05E-14 | 3.44E-14 | salmon |
| VKORC1   | 79001  | vitamin K epoxide reductase complex, subunit 1 (VKORC1), transcript variant 2, mRNA. | -0.07 | 7.39  | 4.66E-05 | 8.34E-05 | salmon |
| WDR12    | 55759  | WD repeat domain 12 (WDR12), mRNA.                                                   | 0.03  | 8.30  | 2.56E-02 | 3.47E-02 | salmon |
| ZFAND5   | 7763   | zinc finger, AN1-type domain 5 (ZFAND5), mRNA.                                       | 0.01  | 7.39  | 3.21E-01 | 3.66E-01 | salmon |
| ZNF239   | 8187   | zinc finger protein 239 (ZNF239), mRNA.                                              | -0.06 | 9.09  | 3.95E-04 | 6.53E-04 | salmon |
| ZNF358   | 140467 | zinc finger protein 358 (ZNF358), mRNA.                                              | -0.27 | 9.95  | 8.19E-46 | 1.10E-44 | salmon |
| ZWINT    | 11130  | ZW10 interactor (ZWINT), transcript variant 2, mRNA.                                 | -0.02 | 11.03 | 7.23E-02 | 9.24E-02 | salmon |
| AARS     | 16     | alanyl-tRNA synthetase (AARS), mRNA.                                                 | -0.31 | 8.18  | 1.17E-45 | 1.56E-44 | tan    |

|         |        |                                                                                             |       |      |          |          |     |
|---------|--------|---------------------------------------------------------------------------------------------|-------|------|----------|----------|-----|
| ABCB9   | 23457  | ATP-binding cassette, sub-family B (MDR/TAP), member 9 (ABCB9), transcript variant 1, mRNA. | -0.32 | 7.45 | 9.87E-39 | 9.46E-38 | tan |
| ACAT2   | 39     | acetyl-Coenzyme A acetyltransferase 2 (acetoacetyl Coenzyme A thiolase) (ACAT2), mRNA.      | 0.11  | 6.94 | 1.10E-11 | 3.02E-11 | tan |
| ACKR1   | 2532   | Duffy blood group, chemokine receptor (DARC), mRNA.                                         | -0.09 | 9.46 | 6.24E-08 | 1.38E-07 | tan |
| ACTN1   | 87     | actinin, alpha 1 (ACTN1), mRNA.                                                             | -0.02 | 9.01 | 4.23E-01 | 4.69E-01 | tan |
| AIM2    | 9447   | absent in melanoma 2 (AIM2), mRNA.                                                          | -0.16 | 7.64 | 5.73E-24 | 2.96E-23 | tan |
| ANG     | 283    | angiogenin, ribonuclease, RNase A family, 5 (ANG), mRNA.                                    | 0.04  | 8.44 | 4.65E-03 | 6.86E-03 | tan |
| ANTXR2  | 118429 | anthrax toxin receptor 2 (ANTXR2), mRNA.                                                    | 0.00  | 9.01 | 8.90E-01 | 9.07E-01 | tan |
| ARCN1   | 372    | archain 1 (ARCN1), mRNA.                                                                    | -0.17 | 8.88 | 9.33E-15 | 3.05E-14 | tan |
| ARFGAP3 | 26286  | ADP-ribosylation factor GTPase activating protein 3 (ARFGAP3), mRNA.                        | 0.07  | 6.90 | 2.50E-06 | 4.96E-06 | tan |
| ARL1    | 400    | ADP-ribosylation factor-like 1 (ARL1), mRNA.                                                | 0.00  | 7.33 | 8.93E-01 | 9.09E-01 | tan |
| ASNS    | 440    | asparagine synthetase (ASNS), transcript variant 1, mRNA.                                   | 0.01  | 7.21 | 3.57E-01 | 4.03E-01 | tan |
| ATF6    | 22926  | activating transcription factor 6 (ATF6), mRNA.                                             | 0.14  | 6.66 | 3.05E-13 | 9.22E-13 | tan |

|          |       |                                                                                    |       |      |          |          |     |
|----------|-------|------------------------------------------------------------------------------------|-------|------|----------|----------|-----|
| ATP6V0A2 | 23545 | ATPase, H <sup>+</sup> transporting, lysosomal V0 subunit a2 (ATP6V0A2), mRNA.     | 0.11  | 9.78 | 1.52E-14 | 4.90E-14 | tan |
| B4GALT3  | 8703  | UDP-Gal:betaGlcNAc beta 1,4- galactosyltransferase, polypeptide 3 (B4GALT3), mRNA. | -0.13 | 6.09 | 1.29E-17 | 4.91E-17 | tan |
| BTN3A2   | 11118 | butyrophilin, subfamily 3, member A2 (BTN3A2), mRNA.                               | 0.21  | 7.62 | 1.18E-27 | 7.18E-27 | tan |
| CAMK1G   | 57172 | calcium/calmodulin-dependent protein kinase IG (CAMK1G), mRNA.                     | -0.01 | 6.43 | 5.87E-01 | 6.29E-01 | tan |
| CARD9    | 64170 | caspase recruitment domain family, member 9 (CARD9), mRNA.                         | 0.12  | 6.61 | 1.18E-10 | 3.06E-10 | tan |
| CDK12    | 51755 | Cdc2-related kinase, arginine/serine-rich (CRKRS), mRNA.                           | 0.12  | 7.24 | 5.05E-12 | 1.42E-11 | tan |
| CHKA     | 1119  | choline kinase alpha (CHKA), transcript variant 1, mRNA.                           | 0.63  | 5.40 | 7.66E-55 | 1.51E-53 | tan |
| CKAP4    | 10970 | cytoskeleton-associated protein 4 (CKAP4), mRNA.                                   | -0.02 | 7.96 | 2.32E-01 | 2.72E-01 | tan |
| COPA     | 1314  | coatomer protein complex, subunit alpha (COPA), mRNA.                              | 0.00  | 9.94 | 8.53E-01 | 8.74E-01 | tan |
| COPB2    | 9276  | coatomer protein complex, subunit beta 2 (beta prime) (COPB2), mRNA.               | 0.24  | 5.92 | 5.80E-22 | 2.71E-21 | tan |
| COPG1    | 22820 | coatomer protein complex, subunit gamma (COPG), mRNA.                              | 0.13  | 9.31 | 8.32E-12 | 2.31E-11 | tan |

|         |       |                                                                              |       |       |          |          |     |
|---------|-------|------------------------------------------------------------------------------|-------|-------|----------|----------|-----|
| CRELD1  | 78987 | cysteine-rich with EGF-like domains 1 (CRELD1), transcript variant 1, mRNA.  | 0.08  | 7.35  | 4.24E-05 | 7.63E-05 | tan |
| CRELD2  | 79174 | cysteine-rich with EGF-like domains 2 (CRELD2), mRNA.                        | -0.04 | 7.35  | 4.15E-04 | 6.84E-04 | tan |
| CSTB    | 1476  | cystatin B (stefin B) (CSTB), mRNA.                                          | -0.05 | 7.59  | 5.80E-03 | 8.46E-03 | tan |
| CTH     | 1491  | cystathionase (cystathionine gamma-lyase) (CTH), transcript variant 1, mRNA. | 0.02  | 9.29  | 1.31E-01 | 1.60E-01 | tan |
| CYB5A   | 1528  | cytochrome b5 type A (microsomal) (CYB5A), transcript variant 1, mRNA.       | 0.09  | 9.93  | 4.84E-10 | 1.22E-09 | tan |
| DDOST   | 1650  | dolichyl-diphosphooligosaccharide-protein glycosyltransferase (DDOST), mRNA. | 0.05  | 7.42  | 6.63E-06 | 1.28E-05 | tan |
| DECR2   | 26063 | 2,4-dienoyl CoA reductase 2, peroxisomal (DECR2), mRNA.                      | -0.02 | 7.30  | 1.27E-01 | 1.56E-01 | tan |
| DERL2   | 51009 | Der1-like domain family, member 2 (DERL2), mRNA.                             | -0.04 | 10.16 | 6.33E-03 | 9.22E-03 | tan |
| DNAJB11 | 51726 | DnaJ (Hsp40) homolog, subfamily B, member 11 (DNAJB11), mRNA.                | -0.04 | 7.39  | 1.19E-03 | 1.87E-03 | tan |
| DNAJB9  | 4189  | DnaJ (Hsp40) homolog, subfamily B, member 9 (DNAJB9), mRNA.                  | 0.03  | 7.14  | 4.05E-02 | 5.35E-02 | tan |
| DNAJC3  | 5611  | DnaJ (Hsp40) homolog, subfamily C, member 3 (DNAJC3), mRNA.                  | -0.27 | 6.64  | 6.66E-52 | 1.13E-50 | tan |



|         |       |                                                                                                                                                     |       |      |          |          |     |
|---------|-------|-----------------------------------------------------------------------------------------------------------------------------------------------------|-------|------|----------|----------|-----|
| DPAGT1  | 1798  | dolichyl-phosphate (UDP-N-acetylglucosamine) N-acetylglucosaminephosphotransferase 1 (GlcNAc-1-P transferase) (DPAGT1), transcript variant 2, mRNA. | 0.12  | 8.96 | 1.93E-17 | 7.30E-17 | tan |
| DUSP14  | 11072 | dual specificity phosphatase 14 (DUSP14), mRNA.                                                                                                     | -0.20 | 9.98 | 3.14E-39 | 3.06E-38 | tan |
| EDEM2   | 55741 | ER degradation enhancer, mannosidase alpha-like 2 (EDEM2), mRNA.                                                                                    | 0.12  | 5.89 | 7.98E-11 | 2.10E-10 | tan |
| ELL2    | 22936 | elongation factor, RNA polymerase II, 2 (ELL2), mRNA.                                                                                               | -0.42 | 7.10 | 3.56E-62 | 1.11E-60 | tan |
| EPHX2   | 2053  | epoxide hydrolase 2, cytoplasmic (EPHX2), mRNA.                                                                                                     | 0.12  | 7.62 | 1.71E-11 | 4.67E-11 | tan |
| ERGIC1  | 57222 | endoplasmic reticulum-golgi intermediate compartment (ERGIC) 1 (ERGIC1), transcript variant 1, mRNA.                                                | 0.49  | 5.99 | 1.23E-42 | 1.42E-41 | tan |
| ERLEC1  | 27248 | chromosome 2 open reading frame 30 (C2orf30), mRNA.                                                                                                 | -0.13 | 7.69 | 9.90E-08 | 2.16E-07 | tan |
| EVI2B   | 2124  | ecotropic viral integration site 2B (EVI2B), mRNA.                                                                                                  | -0.03 | 9.16 | 8.12E-03 | 1.17E-02 | tan |
| FADS1   | 3992  | fatty acid desaturase 1 (FADS1), mRNA.                                                                                                              | 0.29  | 7.19 | 6.97E-35 | 5.53E-34 | tan |
| FAIM3   | 9214  | Fas apoptotic inhibitory molecule 3 (FAIM3), mRNA.                                                                                                  | -0.03 | 5.68 | 5.07E-02 | 6.61E-02 | tan |
| FAM214A | 56204 | KIAA1370 (KIAA1370), mRNA.                                                                                                                          | -0.11 | 6.76 | 2.05E-14 | 6.56E-14 | tan |

|         |        |                                                                      |       |       |          |          |     |
|---------|--------|----------------------------------------------------------------------|-------|-------|----------|----------|-----|
| FAM46C  | 54855  | family with sequence similarity 46, member C (FAM46C), mRNA.         | -0.11 | 8.17  | 2.75E-10 | 7.03E-10 | tan |
| FICD    | 11153  | Huntingtin interacting protein E (HYPE), mRNA.                       | -0.03 | 8.02  | 7.25E-02 | 9.26E-02 | tan |
| FKBP11  | 51303  | FK506 binding protein 11, 19 kDa (FKBP11), mRNA.                     | 0.02  | 5.80  | 1.74E-01 | 2.09E-01 | tan |
| FKBP2   | 2286   | FK506 binding protein 2, 13kDa (FKBP2), transcript variant 1, mRNA.  | 0.26  | 6.13  | 3.18E-30 | 2.07E-29 | tan |
| FNDC3B  | 64778  | fibronectin type III domain containing 3B (FNDC3B), mRNA.            | 0.04  | 6.65  | 1.27E-03 | 1.98E-03 | tan |
| FRMD6   | 122786 | FERM domain containing 6 (FRMD6), transcript variant 1, mRNA.        | 0.05  | 6.43  | 2.01E-02 | 2.76E-02 | tan |
| GALM    | 130589 | galactose mutarotase (aldose 1-epimerase) (GALM), mRNA.              | 0.29  | 8.94  | 1.94E-33 | 1.44E-32 | tan |
| GARS    | 2617   | glycyl-tRNA synthetase (GARS), mRNA.                                 | 0.03  | 7.45  | 2.68E-02 | 3.62E-02 | tan |
| GMPPA   | 29926  | GDP-mannose pyrophosphorylase A (GMPPA), transcript variant 1, mRNA. | 0.01  | 10.83 | 5.89E-01 | 6.31E-01 | tan |
| GMPPB   | 29925  | GDP-mannose pyrophosphorylase B (GMPPB), transcript variant 1, mRNA. | -0.04 | 6.83  | 4.04E-02 | 5.34E-02 | tan |
| GORASP2 | 26003  | golgi reassembly stacking protein 2, 55kDa (GORASP2), mRNA.          | 0.07  | 9.61  | 3.66E-04 | 6.06E-04 | tan |

|          |        |                                                                                                                                       |       |       |          |          |     |
|----------|--------|---------------------------------------------------------------------------------------------------------------------------------------|-------|-------|----------|----------|-----|
| GPX4     | 2879   | glutathione peroxidase 4 (phospholipid hydroperoxidase) (GPX4), transcript variant 3, mRNA.                                           | -0.06 | 7.50  | 7.12E-06 | 1.37E-05 | tan |
| GSTT1    | 2952   | glutathione S-transferase theta 1 (GSTT1), mRNA.                                                                                      | -0.12 | 7.28  | 1.51E-06 | 3.03E-06 | tan |
| H3F3B    | 3021   | H3 histone, family 3B (H3.3B) (H3F3B), mRNA.                                                                                          | -0.12 | 8.96  | 2.77E-16 | 9.81E-16 | tan |
| HENMT1   | 113802 | chromosome 1 open reading frame 59 (C1orf59), mRNA.                                                                                   | 0.20  | 6.61  | 3.10E-23 | 1.55E-22 | tan |
| HERPUD1  | 9709   | homocysteine-inducible, endoplasmic reticulum stress-inducible, ubiquitin-like domain member 1 (HERPUD1), transcript variant 2, mRNA. | 0.10  | 7.01  | 1.51E-14 | 4.88E-14 | tan |
| HIP1R    | 728014 | PREDICTED: similar to huntingtin interacting protein 1 related (LOC728014), mRNA.                                                     | 0.00  | 6.75  | 8.80E-01 | 8.98E-01 | tan |
| HLA-DRB1 | 3123   | major histocompatibility complex, class II, DR beta 1 (HLA-DRB1), mRNA.                                                               | -0.09 | 11.56 | 8.43E-10 | 2.09E-09 | tan |
| HSPA5    | 3309   | heat shock 70kDa protein 5 (glucose-regulated protein, 78kDa) (HSPA5), mRNA.                                                          | 0.03  | 10.50 | 4.19E-02 | 5.52E-02 | tan |
| HYOU1    | 10525  | hypoxia up-regulated 1 (HYOU1), mRNA.                                                                                                 | -0.25 | 9.16  | 5.39E-31 | 3.61E-30 | tan |

|           |        |                                                                                                                                |       |      |          |          |     |
|-----------|--------|--------------------------------------------------------------------------------------------------------------------------------|-------|------|----------|----------|-----|
| IGJ       | 3512   | immunoglobulin J polypeptide, linker protein for immunoglobulin alpha and mu polypeptides (IGJ), mRNA.                         | 0.15  | 8.17 | 5.05E-16 | 1.77E-15 | tan |
| IMMP2L    | 83943  | IMP2 inner mitochondrial membrane peptidase-like (S. cerevisiae) (IMMP2L), mRNA.                                               | 0.00  | 5.63 | 7.44E-01 | 7.75E-01 | tan |
| ITGA4     | 3676   | integrin, alpha 4 (antigen CD49D, alpha 4 subunit of VLA-4 receptor) (ITGA4), mRNA.                                            | -0.06 | 6.79 | 3.00E-04 | 5.02E-04 | tan |
| ITM2C     | 81618  | integral membrane protein 2C (ITM2C), transcript variant 1, mRNA.                                                              | 0.27  | 6.97 | 2.03E-24 | 1.07E-23 | tan |
| KCND2     | 3751   | potassium voltage-gated channel, Shal-related subfamily, member 2 (KCND2), mRNA.                                               | 0.05  | 9.27 | 4.15E-04 | 6.85E-04 | tan |
| KCNN3     | 3782   | potassium intermediate/small conductance calcium-activated channel, subfamily N, member 3 (KCNN3), transcript variant 2, mRNA. | 0.08  | 8.54 | 1.40E-04 | 2.39E-04 | tan |
| KCTD5     | 54442  | potassium channel tetramerisation domain containing 5 (KCTD5), mRNA.                                                           | -0.25 | 6.50 | 1.49E-31 | 1.03E-30 | tan |
| KIAA0125  | 9834   | KIAA0125 (KIAA0125), mRNA.                                                                                                     | 0.15  | 9.50 | 1.98E-25 | 1.09E-24 | tan |
| KIAA1549L | 120196 | chromosome 11 open reading frame 69 (C11orf69), mRNA.                                                                          | -0.49 | 9.38 | 3.25E-75 | 1.92E-73 | tan |

|          |       |                                                                                                     |       |       |          |          |     |
|----------|-------|-----------------------------------------------------------------------------------------------------|-------|-------|----------|----------|-----|
| KLHL42   | 57542 | kelch domain containing 5 (KLHDC5), mRNA.                                                           | 0.12  | 5.35  | 4.33E-07 | 9.05E-07 | tan |
| LHX2     | 9355  | LIM homeobox 2 (LHX2), mRNA.                                                                        | -0.01 | 6.38  | 6.61E-01 | 6.98E-01 | tan |
| LRP10    | 26020 | low density lipoprotein receptor-related protein 10 (LRP10), mRNA.                                  | -0.22 | 10.37 | 8.20E-35 | 6.45E-34 | tan |
| LRRFIP2  | 9209  | leucine rich repeat (in FLII) interacting protein 2 (LRRFIP2), transcript variant 2, mRNA.          | -0.11 | 7.01  | 4.18E-12 | 1.18E-11 | tan |
| MAGED1   | 9500  | melanoma antigen family D, 1 (MAGED1), transcript variant 3, mRNA.                                  | 0.03  | 7.25  | 5.05E-02 | 6.58E-02 | tan |
| MAN2A1   | 4124  | mannosidase, alpha, class 2A, member 1 (MAN2A1), mRNA.                                              | 0.00  | 9.11  | 7.51E-01 | 7.82E-01 | tan |
| MANF     | 7873  | arginine-rich, mutated in early stage tumors (ARMET), mRNA.                                         | 0.14  | 9.55  | 3.45E-23 | 1.71E-22 | tan |
| MAP3K7CL | 56911 | chromosome 21 open reading frame 7 (C21orf7), mRNA.                                                 | -0.08 | 9.64  | 5.48E-15 | 1.81E-14 | tan |
| MAPKAPK2 | 9261  | mitogen-activated protein kinase-activated protein kinase 2 (MAPKAPK2), transcript variant 2, mRNA. | -0.03 | 6.99  | 4.71E-02 | 6.16E-02 | tan |
| MIS12    | 79003 | MIS12, MIND kinetochore complex component, homolog (yeast) (MIS12), mRNA.                           | -0.06 | 9.81  | 5.09E-09 | 1.21E-08 | tan |

|        |        |                                                                                                           |       |       |          |          |     |
|--------|--------|-----------------------------------------------------------------------------------------------------------|-------|-------|----------|----------|-----|
| MRPS31 | 10240  | mitochondrial ribosomal protein S31 (MRPS31), nuclear gene encoding mitochondrial protein, mRNA.          | 0.90  | 9.36  | 1.03E-70 | 4.81E-69 | tan |
| MYDGF  | 56005  | chromosome 19 open reading frame 10 (C19orf10), mRNA.                                                     | -0.03 | 7.44  | 1.81E-01 | 2.16E-01 | tan |
| NA     | 51237  | proapoptotic caspase adaptor protein (PACAP), mRNA.                                                       | -0.28 | 7.79  | 4.41E-45 | 5.64E-44 | tan |
| NA     | 284040 | CMT1A duplicated region transcript 4 (CDRT4), mRNA.                                                       | 0.15  | 6.81  | 2.60E-18 | 1.02E-17 | tan |
| NA     | 2081   | endoplasmic reticulum to nucleus signalling 1 (ERN1), transcript variant 2, mRNA.                         | -0.11 | 8.85  | 3.25E-15 | 1.08E-14 | tan |
| NANS   | 54187  | N-acetylneuraminic acid synthase (sialic acid synthase) (NANS), mRNA.                                     | 0.00  | 6.34  | 9.97E-01 | 9.97E-01 | tan |
| NAPSA  | 9476   | napsin A aspartic peptidase (NAPSA), mRNA.                                                                | 0.02  | 9.67  | 1.31E-01 | 1.60E-01 | tan |
| NECAP2 | 55707  | NECAP endocytosis associated 2 (NECAP2), mRNA.                                                            | 0.05  | 9.07  | 4.74E-04 | 7.78E-04 | tan |
| NUCB1  | 4924   | nucleobindin 1 (NUCB1), mRNA.                                                                             | 0.10  | 8.44  | 3.87E-08 | 8.65E-08 | tan |
| OAF    | 220323 | OAF homolog (Drosophila) (OAF), mRNA.                                                                     | -0.27 | 5.76  | 7.89E-37 | 6.93E-36 | tan |
| P4HB   | 5034   | procollagen-proline, 2-oxoglutarate 4-dioxygenase (proline 4-hydroxylase), beta polypeptide (P4HB), mRNA. | 0.08  | 10.02 | 8.27E-09 | 1.94E-08 | tan |

|          |       |                                                                                                           |       |       |          |          |     |
|----------|-------|-----------------------------------------------------------------------------------------------------------|-------|-------|----------|----------|-----|
| PAM      | 5066  | peptidylglycine alpha-amidating monooxygenase (PAM), transcript variant 3, mRNA.                          | 0.02  | 7.18  | 1.96E-01 | 2.33E-01 | tan |
| PDCD1    | 5133  | programmed cell death 1 (PDCD1), mRNA.                                                                    | 0.00  | 9.48  | 6.46E-01 | 6.84E-01 | tan |
| PDIA4    | 9601  | protein disulfide isomerase family A, member 4 (PDIA4), mRNA.                                             | -0.03 | 7.50  | 2.98E-02 | 3.99E-02 | tan |
| PDIA5    | 10954 | protein disulfide isomerase family A, member 5 (PDIA5), mRNA.                                             | -0.10 | 9.24  | 3.29E-16 | 1.17E-15 | tan |
| PHGDH    | 26227 | phosphoglycerate dehydrogenase (PHGDH), mRNA.                                                             | -0.08 | 8.41  | 7.70E-13 | 2.28E-12 | tan |
| PIM2     | 11040 | pim-2 oncogene (PIM2), mRNA.                                                                              | 0.05  | 8.73  | 5.71E-07 | 1.18E-06 | tan |
| PNOC     | 5368  | prepronociceptin (PNOC), mRNA.                                                                            | 0.17  | 7.76  | 3.02E-28 | 1.85E-27 | tan |
| POP5     | 51367 | processing of precursor 5, ribonuclease P/MRP subunit (S. cerevisiae) (POP5), transcript variant 1, mRNA. | -0.22 | 6.03  | 3.68E-20 | 1.59E-19 | tan |
| PPAPDC1B | 84513 | phosphatidic acid phosphatase type 2 domain containing 1B (PPAPDC1B), mRNA.                               | -0.26 | 9.29  | 5.19E-29 | 3.25E-28 | tan |
| PPIB     | 5479  | peptidylprolyl isomerase B (cyclophilin B) (PPIB), mRNA.                                                  | -0.09 | 11.79 | 6.83E-11 | 1.81E-10 | tan |
| PPP3CC   | 5533  | protein phosphatase 3 (formerly 2B), catalytic subunit, gamma isoform (PPP3CC), mRNA.                     | -0.15 | 8.36  | 1.01E-18 | 4.06E-18 | tan |

|         |        |                                                                                                                                    |       |       |          |          |     |
|---------|--------|------------------------------------------------------------------------------------------------------------------------------------|-------|-------|----------|----------|-----|
| PPP3R1  | 5534   | protein phosphatase 3 (formerly 2B), regulatory subunit B, alpha isoform (PPP3R1), mRNA.                                           | 0.01  | 8.08  | 3.66E-01 | 4.11E-01 | tan |
| PRRT3   | 285368 | proline-rich transmembrane protein 3 (PRRT3), mRNA.                                                                                | 0.04  | 9.10  | 1.39E-01 | 1.69E-01 | tan |
| PSTPIP2 | 9050   | proline-serine-threonine phosphatase interacting protein 2 (PSTPIP2), mRNA.                                                        | -0.10 | 7.48  | 2.37E-10 | 6.08E-10 | tan |
| PTGER4  | 5734   | prostaglandin E receptor 4 (subtype EP4) (PTGER4), mRNA.                                                                           | 0.01  | 10.98 | 3.44E-01 | 3.89E-01 | tan |
| PTPN13  | 5783   | protein tyrosine phosphatase, non-receptor type 13 (APO-1/CD95 (Fas)-associated phosphatase) (PTPN13), transcript variant 4, mRNA. | 0.75  | 9.12  | 1.09E-80 | 1.01E-78 | tan |
| RAB30   | 27314  | RAB30, member RAS oncogene family (RAB30), mRNA.                                                                                   | 0.02  | 7.01  | 2.35E-01 | 2.75E-01 | tan |
| RABAC1  | 10567  | Rab acceptor 1 (prenylated) (RABAC1), mRNA.                                                                                        | 0.01  | 9.34  | 4.99E-01 | 5.44E-01 | tan |
| RALA    | 5898   | v-ral simian leukemia viral oncogene homolog A (ras related) (RALA), mRNA.                                                         | 0.05  | 9.13  | 1.68E-03 | 2.60E-03 | tan |
| RCN1    | 728913 | PREDICTED: similar to Reticulocalbin-1 precursor (LOC728913), mRNA.                                                                | -0.01 | 5.79  | 4.50E-01 | 4.96E-01 | tan |



|        |        |                                                                                                                                  |       |       |           |          |     |
|--------|--------|----------------------------------------------------------------------------------------------------------------------------------|-------|-------|-----------|----------|-----|
| RHOQ   | 23433  | ras homolog gene family, member Q (RHOQ), mRNA.                                                                                  | 0.01  | 9.48  | 7.99E-01  | 8.26E-01 | tan |
| RNF103 | 7844   | ring finger protein 103 (RNF103), mRNA.                                                                                          | -0.05 | 6.47  | 1.05E-03  | 1.66E-03 | tan |
| RPN1   | 6184   | ribophorin I (RPN1), mRNA.                                                                                                       | 0.37  | 10.98 | 9.10E-50  | 1.42E-48 | tan |
| SCFD1  | 23256  | sec1 family domain containing 1 (SCFD1), transcript variant 2, mRNA.                                                             | 0.02  | 11.75 | 4.57E-01  | 5.03E-01 | tan |
| SDF2L1 | 23753  | stromal cell-derived factor 2-like 1 (SDF2L1), mRNA.                                                                             | -0.07 | 9.09  | 5.03E-04  | 8.23E-04 | tan |
| SEC24C | 9632   | SEC24 related gene family, member C ( <i>S. cerevisiae</i> ) (SEC24C), transcript variant 2, mRNA.                               | 0.24  | 7.41  | 1.34E-27  | 8.08E-27 | tan |
| SEC31A | 22872  | SEC31 homolog A ( <i>S. cerevisiae</i> ) (SEC31A), transcript variant 2, mRNA.                                                   | 0.08  | 8.35  | 1.46E-07  | 3.16E-07 | tan |
| SELM   | 140606 | selenoprotein M (SELM), mRNA.                                                                                                    | 0.80  | 7.34  | 4.64E-102 | 1.96E-99 | tan |
| SEMA4A | 64218  | sema domain, immunoglobulin domain (Ig), transmembrane domain (TM) and short cytoplasmic domain, (semaphorin) 4A (SEMA4A), mRNA. | 0.13  | 6.41  | 1.31E-13  | 4.03E-13 | tan |
| SHMT2  | 6472   | serine hydroxymethyltransferase 2 (mitochondrial) (SHMT2), mRNA.                                                                 | 0.32  | 6.34  | 9.98E-48  | 1.48E-46 | tan |

|          |        |                                                                                                            |       |       |          |          |     |
|----------|--------|------------------------------------------------------------------------------------------------------------|-------|-------|----------|----------|-----|
| SIL1     | 64374  | SIL1 homolog, endoplasmic reticulum chaperone ( <i>S. cerevisiae</i> ) (SIL1), transcript variant 2, mRNA. | -0.23 | 6.74  | 4.20E-26 | 2.38E-25 | tan |
| SLAIN1   | 122060 | SLAIN motif family, member 1 (SLAIN1), transcript variant 1, mRNA.                                         | 0.05  | 7.65  | 2.82E-04 | 4.73E-04 | tan |
| SLC35B1  | 10237  | solute carrier family 35, member B1 (SLC35B1), mRNA.                                                       | 0.10  | 6.18  | 6.52E-07 | 1.34E-06 | tan |
| SLC38A10 | 124565 | hypothetical protein MGC15523 (MGC15523), transcript variant 2, mRNA.                                      | 0.03  | 7.37  | 3.73E-03 | 5.55E-03 | tan |
| SLC39A14 | 23516  | solute carrier family 39 (zinc transporter), member 14 (SLC39A14), mRNA.                                   | -0.04 | 10.01 | 9.45E-03 | 1.35E-02 | tan |
| SLC7A1   | 6541   | solute carrier family 7 (cationic amino acid transporter, y+ system), member 1 (SLC7A1), mRNA.             | -0.18 | 8.22  | 2.51E-22 | 1.19E-21 | tan |
| SLC7A5   | 8140   | solute carrier family 7 (cationic amino acid transporter, y+ system), member 5 (SLC7A5), mRNA.             | -0.06 | 8.49  | 1.51E-08 | 3.47E-08 | tan |
| SMCO4    | 56935  | chromosome 11 open reading frame 75 (C11orf75), mRNA.                                                      | 0.02  | 7.36  | 3.99E-01 | 4.45E-01 | tan |
| SPCS2    | 9789   | signal peptidase complex subunit 2 homolog ( <i>S. cerevisiae</i> ) (SPCS2), mRNA.                         | 0.01  | 6.98  | 7.63E-01 | 7.92E-01 | tan |

|             |        |                                                                                                                                                          |       |       |          |          |     |
|-------------|--------|----------------------------------------------------------------------------------------------------------------------------------------------------------|-------|-------|----------|----------|-----|
| SPCS3       | 60559  | signal peptidase complex subunit 3 homolog (S. cerevisiae) (SPCS3), mRNA.                                                                                | -0.22 | 8.78  | 1.88E-37 | 1.70E-36 | tan |
| SPRED1      | 161742 | sprouty-related, EVH1 domain containing 1 (SPRED1), mRNA.                                                                                                | -0.01 | 10.36 | 5.84E-01 | 6.26E-01 | tan |
| SPTY2D1     | 144108 | SPT2, Suppressor of Ty, domain containing 1 (S. cerevisiae) (SPTY2D1), mRNA.                                                                             | -0.08 | 8.09  | 8.94E-07 | 1.83E-06 | tan |
| SRPR        | 6734   | signal recognition particle receptor ('docking protein') (SRPR), mRNA.                                                                                   | -0.02 | 7.67  | 1.55E-01 | 1.88E-01 | tan |
| ST6GALNA C4 | 27090  | ST6 (alpha-N-acetyl-neuraminy1-2,3-beta-galactosyl-1, 3)-N-acetylgalactosaminide alpha-2,6-sialyltransferase 4 (ST6GALNAC4), transcript variant 2, mRNA. | -0.19 | 7.70  | 3.00E-20 | 1.30E-19 | tan |
| SURF4       | 6836   | surfeit 4 (SURF4), mRNA.                                                                                                                                 | 0.01  | 12.40 | 4.28E-01 | 4.74E-01 | tan |
| SYVN1       | 84447  | synovial apoptosis inhibitor 1, synoviolin (SYVN1), transcript variant 1, mRNA.                                                                          | -0.01 | 7.25  | 5.42E-01 | 5.86E-01 | tan |
| TLR9        | 54106  | toll-like receptor 9 (TLR9), transcript variant A, mRNA.                                                                                                 | -0.21 | 5.62  | 4.73E-25 | 2.57E-24 | tan |
| TM9SF1      | 10548  | transmembrane 9 superfamily member 1 (TM9SF1), transcript variant 1, mRNA.                                                                               | -0.02 | 7.71  | 2.21E-01 | 2.60E-01 | tan |

|         |        |                                                                          |       |       |          |          |     |
|---------|--------|--------------------------------------------------------------------------|-------|-------|----------|----------|-----|
| TMED5   | 50999  | transmembrane emp24 protein transport domain containing 5 (TMED5), mRNA. | 0.01  | 7.57  | 5.48E-01 | 5.92E-01 | tan |
| TMED9   | 54732  | transmembrane emp24 protein transport domain containing 9 (TMED9), mRNA. | 0.05  | 10.66 | 1.16E-04 | 2.00E-04 | tan |
| TMEM5   | 10329  | transmembrane protein 5 (TMEM5), mRNA.                                   | -0.13 | 8.03  | 3.29E-19 | 1.36E-18 | tan |
| TMEM59  | 9528   | transmembrane protein 59 (TMEM59), mRNA.                                 | -0.02 | 6.34  | 2.67E-01 | 3.09E-01 | tan |
| TSPAN12 | 23554  | tetraspanin 12 (TSPAN12), mRNA.                                          | 0.27  | 8.81  | 1.08E-40 | 1.12E-39 | tan |
| TXNDC11 | 51061  | thioredoxin domain containing 11 (TXNDC11), mRNA.                        | -0.04 | 9.55  | 2.89E-02 | 3.88E-02 | tan |
| UBALD2  | 283991 | family with sequence similarity 100, member B (FAM100B), mRNA.           | 0.02  | 8.59  | 1.22E-01 | 1.51E-01 | tan |
| VPS37B  | 79720  | vacuolar protein sorting 37 homolog B (S. cerevisiae) (VPS37B), mRNA.    | -0.13 | 8.72  | 2.94E-11 | 7.93E-11 | tan |
| WARS    | 7453   | tryptophanyl-tRNA synthetase (WARS), transcript variant 3, mRNA.         | 0.08  | 6.84  | 4.49E-07 | 9.35E-07 | tan |
| WDR33   | 55339  | WD repeat domain 33 (WDR33), transcript variant 2, mRNA.                 | -0.25 | 6.47  | 7.62E-35 | 6.02E-34 | tan |
| WIPI1   | 55062  | WD repeat domain, phosphoinositide interacting 1 (WIPI1), mRNA.          | -0.03 | 8.27  | 1.03E-01 | 1.28E-01 | tan |
| XBP1    | 7494   | X-box binding protein 1 (XBP1), transcript variant 1, mRNA.              | 0.10  | 5.81  | 3.23E-11 | 8.67E-11 | tan |

|        |        |                                                                                                                       |       |      |          |          |           |
|--------|--------|-----------------------------------------------------------------------------------------------------------------------|-------|------|----------|----------|-----------|
| AAED1  | 195827 | chromosome 9 open reading frame 21 (C9orf21), mRNA.                                                                   | -0.13 | 8.52 | 3.55E-09 | 8.51E-09 | turquoise |
| AAMDC  | 28971  | chromosome 11 open reading frame 67 (C11orf67), mRNA.                                                                 | 0.07  | 6.25 | 1.21E-03 | 1.89E-03 | turquoise |
| ABCA6  | 23460  | ATP-binding cassette, sub-family A (ABC1), member 6 (ABCA6), mRNA.                                                    | 0.12  | 9.62 | 5.72E-14 | 1.80E-13 | turquoise |
| ABCB10 | 23456  | ATP-binding cassette, sub-family B (MDR/TAP), member 10 (ABCB10), nuclear gene encoding mitochondrial protein, mRNA.  | 0.24  | 9.06 | 1.70E-40 | 1.75E-39 | turquoise |
| ABCC4  | 10257  | ATP-binding cassette, sub-family C (CFTR/MRP), member 4 (ABCC4), mRNA.                                                | 0.02  | 7.26 | 1.90E-01 | 2.27E-01 | turquoise |
| ABHD6  | 57406  | abhydrolase domain containing 6 (ABHD6), mRNA.                                                                        | 0.13  | 8.36 | 2.26E-12 | 6.49E-12 | turquoise |
| ABI1   | 10006  | abl-interactor 1 (ABI1), transcript variant 1, mRNA.                                                                  | -0.01 | 9.93 | 6.40E-01 | 6.79E-01 | turquoise |
| ABI3   | 51225  | ABI gene family, member 3 (ABI3), mRNA.                                                                               | -0.05 | 9.52 | 1.78E-03 | 2.75E-03 | turquoise |
| ACADM  | 34     | acyl-Coenzyme A dehydrogenase, C-4 to C-12 straight chain (ACADM), nuclear gene encoding mitochondrial protein, mRNA. | 0.03  | 7.82 | 7.29E-02 | 9.30E-02 | turquoise |
| ACKR3  | 57007  | chemokine (C-X-C motif) receptor 7 (CXCR7), transcript variant 2, mRNA.                                               | -0.01 | 7.81 | 4.03E-01 | 4.49E-01 | turquoise |

|         |        |                                                                                                                        |       |       |          |          |           |
|---------|--------|------------------------------------------------------------------------------------------------------------------------|-------|-------|----------|----------|-----------|
| ACO1    | 48     | aconitase 1, soluble (ACO1), mRNA.                                                                                     | 0.05  | 7.06  | 6.69E-04 | 1.08E-03 | turquoise |
| ACOT4   | 122970 | acyl-CoA thioesterase 4 (ACOT4), mRNA.                                                                                 | 0.04  | 5.77  | 9.26E-03 | 1.32E-02 | turquoise |
| ACOX3   | 8310   | acyl-Coenzyme A oxidase 3, pristanoyl (ACOX3), mRNA.                                                                   | -0.06 | 5.39  | 1.07E-04 | 1.86E-04 | turquoise |
| ACP6    | 51205  | acid phosphatase 6, lysophosphatidic (ACP6), mRNA.                                                                     | -0.18 | 8.34  | 4.67E-24 | 2.42E-23 | turquoise |
| ACSL4   | 2182   | acyl-CoA synthetase long-chain family member 4 (ACSL4), transcript variant 1, mRNA.                                    | 0.19  | 6.82  | 1.62E-22 | 7.75E-22 | turquoise |
| ADAM19  | 8728   | ADAM metallopeptidase domain 19 (meltrin beta) (ADAM19), transcript variant 2, mRNA.                                   | -0.11 | 8.15  | 3.55E-10 | 9.02E-10 | turquoise |
| ADAM8   | 101    | ADAM metallopeptidase domain 8 (ADAM8), mRNA.                                                                          | -0.10 | 7.77  | 8.88E-12 | 2.47E-11 | turquoise |
| ADAP1   | 11033  | centaurin, alpha 1 (CENTA1), mRNA.                                                                                     | -0.16 | 6.41  | 1.17E-16 | 4.26E-16 | turquoise |
| ADCK3   | 56997  | chaperone, ABC1 activity of bc1 complex homolog (S. pombe) (CABC1), nuclear gene encoding mitochondrial protein, mRNA. | -0.06 | 9.46  | 2.23E-06 | 4.44E-06 | turquoise |
| ADD1    | 118    | adducin 1 (alpha) (ADD1), transcript variant 1, mRNA.                                                                  | 0.04  | 7.85  | 3.53E-03 | 5.27E-03 | turquoise |
| ADIPOR2 | 79602  | adiponectin receptor 2 (ADIPOR2), mRNA.                                                                                | 0.06  | 10.23 | 6.35E-04 | 1.03E-03 | turquoise |

|         |       |                                                                                     |       |       |          |          |           |
|---------|-------|-------------------------------------------------------------------------------------|-------|-------|----------|----------|-----------|
| ADO     | 84890 | chromosome 10 open reading frame 22 (C10orf22), mRNA.                               | -0.16 | 9.05  | 7.55E-19 | 3.06E-18 | turquoise |
| ADORA2B | 136   | adenosine A2b receptor (ADORA2B), mRNA.                                             | 0.10  | 8.50  | 5.07E-13 | 1.51E-12 | turquoise |
| AEN     | 64782 | interferon stimulated exonuclease gene 20kDa-like 1 (ISG20L1), mRNA.                | 0.00  | 7.16  | 9.35E-01 | 9.45E-01 | turquoise |
| AHNAK   | 79026 | AHNAK nucleoprotein (desmoyokin) (AHNAK), transcript variant 1, mRNA.               | -0.07 | 7.65  | 3.45E-07 | 7.25E-07 | turquoise |
| AHSA1   | 10598 | AHA1, activator of heat shock 90kDa protein ATPase homolog 1 (yeast) (AHSA1), mRNA. | 0.12  | 9.89  | 3.79E-13 | 1.14E-12 | turquoise |
| AICDA   | 57379 | activation-induced cytidine deaminase (AICDA), mRNA.                                | -0.02 | 6.87  | 2.63E-01 | 3.05E-01 | turquoise |
| AIM1    | 202   | absent in melanoma 1 (AIM1), mRNA.                                                  | 0.21  | 8.28  | 8.90E-20 | 3.76E-19 | turquoise |
| AKAP11  | 11215 | A kinase (PRKA) anchor protein 11 (AKAP11), transcript variant 1, mRNA.             | 0.20  | 5.95  | 2.62E-17 | 9.82E-17 | turquoise |
| AKAP13  | 11214 | A kinase (PRKA) anchor protein 13 (AKAP13), transcript variant 1, mRNA.             | 0.06  | 10.08 | 9.38E-04 | 1.49E-03 | turquoise |
| AKAP7   | 9465  | A kinase (PRKA) anchor protein 7 (AKAP7), transcript variant gamma, mRNA.           | 0.07  | 7.32  | 5.22E-06 | 1.01E-05 | turquoise |
| AKIRIN1 | 79647 | chromosome 1 open reading frame 108 (C1orf108), mRNA.                               | 0.01  | 8.45  | 5.35E-01 | 5.80E-01 | turquoise |

|         |        |                                                                                                                                                                       |       |      |          |          |           |
|---------|--------|-----------------------------------------------------------------------------------------------------------------------------------------------------------------------|-------|------|----------|----------|-----------|
| AKIRIN2 | 55122  | chromosome 6 open reading frame 166 (C6orf166), mRNA.                                                                                                                 | -0.26 | 9.95 | 3.94E-39 | 3.80E-38 | turquoise |
| ALDH5A1 | 7915   | aldehyde dehydrogenase 5 family, member A1 (succinate-semialdehyde dehydrogenase) (ALDH5A1), nuclear gene encoding mitochondrial protein, transcript variant 1, mRNA. | -0.10 | 7.01 | 1.19E-09 | 2.93E-09 | turquoise |
| AMMECR1 | 9949   | Alport syndrome, mental retardation, midface hypoplasia and elliptocytosis chromosomal region, gene 1 (AMMECR1), transcript variant 1, mRNA.                          | 0.03  | 9.47 | 8.71E-02 | 1.10E-01 | turquoise |
| ANGPTL6 | 83854  | angiopoietin-like 6 (ANGPTL6), mRNA.                                                                                                                                  | -0.09 | 6.53 | 1.91E-07 | 4.10E-07 | turquoise |
| ANKRD37 | 353322 | ankyrin repeat domain 37 (ANKRD37), mRNA.                                                                                                                             | -0.05 | 5.87 | 2.05E-03 | 3.14E-03 | turquoise |
| ANXA2R  | 389289 | similar to annexin II receptor (AXIIR), mRNA.                                                                                                                         | 0.21  | 7.29 | 6.51E-29 | 4.06E-28 | turquoise |
| ANXA5   | 308    | annexin A5 (ANXA5), mRNA.                                                                                                                                             | -0.06 | 6.67 | 6.00E-05 | 1.06E-04 | turquoise |
| AP3M2   | 10947  | adaptor-related protein complex 3, mu 2 subunit (AP3M2), mRNA.                                                                                                        | -0.25 | 6.89 | 2.15E-27 | 1.28E-26 | turquoise |
| AP3S1   | 1176   | adaptor-related protein complex 3, sigma 1 subunit (AP3S1), transcript variant 1, mRNA.                                                                               | 0.49  | 6.75 | 4.20E-54 | 7.96E-53 | turquoise |



|          |       |                                                                              |       |      |          |          |           |
|----------|-------|------------------------------------------------------------------------------|-------|------|----------|----------|-----------|
| APAF1    | 317   | apoptotic peptidase activating factor 1 (APAF1), transcript variant 3, mRNA. | -0.39 | 9.04 | 1.02E-52 | 1.77E-51 | turquoise |
| AQP9     | 366   | aquaporin 9 (AQP9), mRNA.                                                    | -0.09 | 8.23 | 7.60E-10 | 1.89E-09 | turquoise |
| ARHGAP1  | 392   | Rho GTPase activating protein 1 (ARHGAP1), mRNA.                             | 0.08  | 9.10 | 4.68E-06 | 9.12E-06 | turquoise |
| ARHGAP15 | 55843 | Rho GTPase activating protein 15 (ARHGAP15), mRNA.                           | 0.03  | 6.15 | 7.02E-02 | 8.98E-02 | turquoise |
| ARHGAP18 | 93663 | Rho GTPase activating protein 18 (ARHGAP18), mRNA.                           | 0.02  | 6.23 | 2.38E-01 | 2.78E-01 | turquoise |
| ARHGAP21 | 57584 | Rho GTPase activating protein 21 (ARHGAP21), mRNA.                           | 0.00  | 9.75 | 8.51E-01 | 8.73E-01 | turquoise |
| ARHGAP9  | 64333 | Rho GTPase activating protein 9 (ARHGAP9), transcript variant 2, mRNA.       | -0.26 | 8.24 | 2.58E-43 | 3.04E-42 | turquoise |
| ARHGEF2  | 9181  | rho/rac guanine nucleotide exchange factor (GEF) 2 (ARHGEF2), mRNA.          | -0.10 | 7.47 | 3.07E-13 | 9.27E-13 | turquoise |
| ARHGEF3  | 50650 | Rho guanine nucleotide exchange factor (GEF) 3 (ARHGEF3), mRNA.              | -0.03 | 7.04 | 9.99E-02 | 1.25E-01 | turquoise |
| ARHGEF6  | 9459  | Rac/Cdc42 guanine nucleotide exchange factor (GEF) 6 (ARHGEF6), mRNA.        | -0.01 | 5.21 | 5.52E-01 | 5.96E-01 | turquoise |

|        |        |                                                                                                                 |       |      |          |          |           |
|--------|--------|-----------------------------------------------------------------------------------------------------------------|-------|------|----------|----------|-----------|
| ARID1A | 8289   | AT rich interactive domain 1A (SWI-like) (ARID1A), transcript variant 2, mRNA.                                  | 0.02  | 7.60 | 3.70E-01 | 4.15E-01 | turquoise |
| ARID3A | 1820   | AT rich interactive domain 3A (BRIGHT-like) (ARID3A), mRNA.                                                     | 0.19  | 7.20 | 6.59E-35 | 5.24E-34 | turquoise |
| ARL5A  | 26225  | ADP-ribosylation factor-like 5A (ARL5A), transcript variant 2, mRNA.                                            | -0.19 | 8.15 | 6.85E-20 | 2.91E-19 | turquoise |
| ARPC5L | 81873  | actin related protein 2/3 complex, subunit 5-like (ARPC5L), mRNA.                                               | 0.01  | 8.77 | 4.67E-01 | 5.12E-01 | turquoise |
| ASAP1  | 50807  | development and differentiation enhancing factor 1 (DDEF1), mRNA.                                               | 0.15  | 8.16 | 1.70E-18 | 6.75E-18 | turquoise |
| ASCL1  | 429    | achaete-scute complex homolog 1 (Drosophila) (ASCL1), mRNA.                                                     | -0.09 | 9.06 | 6.62E-14 | 2.08E-13 | turquoise |
| ASF1A  | 25842  | ASF1 anti-silencing function 1 homolog A (S. cerevisiae) (ASF1A), mRNA.                                         | -0.41 | 6.65 | 1.30E-55 | 2.68E-54 | turquoise |
| ATF5   | 22809  | activating transcription factor 5 (ATF5), mRNA.                                                                 | -0.18 | 8.00 | 3.71E-36 | 3.13E-35 | turquoise |
| ATL3   | 25923  | DKFZP564J0863 protein (DKFZP564J0863), mRNA.                                                                    | 0.05  | 6.07 | 7.34E-04 | 1.18E-03 | turquoise |
| ATP11C | 286410 | ATPase, Class VI, type 11C (ATP11C), transcript variant 2, mRNA.                                                | -0.01 | 9.31 | 5.80E-01 | 6.23E-01 | turquoise |
| ATP1A1 | 476    | ATPase, Na <sup>+</sup> /K <sup>+</sup> transporting, alpha 1 polypeptide (ATP1A1), transcript variant 1, mRNA. | 0.19  | 8.31 | 2.98E-15 | 9.95E-15 | turquoise |

|          |        |                                                                                                             |       |       |          |          |           |
|----------|--------|-------------------------------------------------------------------------------------------------------------|-------|-------|----------|----------|-----------|
| ATP6V0A1 | 535    | ATPase, H <sup>+</sup> transporting, lysosomal V0 subunit a1 (ATP6V0A1), mRNA.                              | -0.05 | 6.82  | 1.02E-03 | 1.61E-03 | turquoise |
| ATXN1    | 6310   | ataxin 1 (ATXN1), mRNA.                                                                                     | -0.01 | 8.98  | 4.70E-01 | 5.15E-01 | turquoise |
| AUH      | 549    | AU RNA binding protein/enoyl-Coenzyme A hydratase (AUH), nuclear gene encoding mitochondrial protein, mRNA. | 0.08  | 7.93  | 5.19E-05 | 9.26E-05 | turquoise |
| AZIN1    | 51582  | antizyme inhibitor 1 (AZIN1), transcript variant 1, mRNA.                                                   | 0.71  | 7.10  | 8.19E-59 | 2.15E-57 | turquoise |
| BCAR3    | 8412   | breast cancer anti-estrogen resistance 3 (BCAR3), mRNA.                                                     | -0.05 | 8.74  | 8.49E-03 | 1.22E-02 | turquoise |
| BCCIP    | 56647  | BRCA2 and CDKN1A interacting protein (BCCIP), transcript variant B, mRNA.                                   | -0.03 | 7.54  | 2.96E-02 | 3.96E-02 | turquoise |
| BCDIN3D  | 144233 | hypothetical protein LOC144233 (LOC144233), mRNA.                                                           | 0.02  | 11.12 | 3.50E-01 | 3.95E-01 | turquoise |
| BCKDHA   | 593    | branched chain keto acid dehydrogenase E1, alpha polypeptide (BCKDHA), mRNA.                                | 0.10  | 7.29  | 2.52E-06 | 4.99E-06 | turquoise |
| BEND6    | 221336 | chromosome 6 open reading frame 65 (C6orf65), mRNA.                                                         | -0.11 | 8.76  | 3.80E-12 | 1.08E-11 | turquoise |
| BET1L    | 51272  | blocked early in transport 1 homolog (S. cerevisiae)-like (BET1L), mRNA.                                    | -0.16 | 8.32  | 2.09E-17 | 7.89E-17 | turquoise |

|        |       |                                                                                  |       |       |          |          |           |
|--------|-------|----------------------------------------------------------------------------------|-------|-------|----------|----------|-----------|
| BIK    | 638   | BCL2-interacting killer (apoptosis-inducing) (BIK), mRNA.                        | 0.03  | 11.64 | 2.49E-02 | 3.37E-02 | turquoise |
| BIN1   | 274   | bridging integrator 1 (BIN1), transcript variant 6, mRNA.                        | -0.17 | 8.77  | 1.90E-30 | 1.24E-29 | turquoise |
| BLMH   | 642   | bleomycin hydrolase (BLMH), mRNA.                                                | -0.09 | 9.28  | 2.92E-08 | 6.59E-08 | turquoise |
| BLNK   | 29760 | B-cell linker (BLNK), mRNA.                                                      | -0.07 | 7.95  | 1.18E-07 | 2.56E-07 | turquoise |
| BMF    | 90427 | Bcl2 modifying factor (BMF), transcript variant 2, mRNA.                         | 0.18  | 5.53  | 2.08E-16 | 7.44E-16 | turquoise |
| BMP2K  | 55589 | BMP2 inducible kinase (BMP2K), transcript variant 2, mRNA.                       | 0.02  | 8.75  | 1.22E-01 | 1.50E-01 | turquoise |
| BMP6   | 654   | bone morphogenetic protein 6 (BMP6), mRNA.                                       | -0.04 | 8.74  | 3.41E-04 | 5.66E-04 | turquoise |
| BNIP3L | 665   | BCL2/adenovirus E1B 19kDa interacting protein 3-like (BNIP3L), mRNA.             | 0.09  | 7.39  | 7.23E-09 | 1.70E-08 | turquoise |
| BRCA1  | 672   | breast cancer 1, early onset (BRCA1), transcript variant BRCA1-delta14-17, mRNA. | 0.06  | 8.84  | 2.48E-05 | 4.55E-05 | turquoise |
| BRD3   | 8019  | bromodomain containing 3 (BRD3), mRNA.                                           | -0.02 | 6.17  | 1.53E-01 | 1.86E-01 | turquoise |
| BTBD6  | 90135 | BTB (POZ) domain containing 6 (BTBD6), mRNA.                                     | 0.25  | 10.39 | 6.48E-35 | 5.15E-34 | turquoise |
| BTG1   | 694   | B-cell translocation gene 1, anti-proliferative (BTG1), mRNA.                    | -0.03 | 7.97  | 5.30E-02 | 6.90E-02 | turquoise |
| BTG2   | 7832  | BTG family, member 2 (BTG2), mRNA.                                               | 0.04  | 9.61  | 2.43E-02 | 3.30E-02 | turquoise |

|           |        |                                                                                                  |       |       |          |          |           |
|-----------|--------|--------------------------------------------------------------------------------------------------|-------|-------|----------|----------|-----------|
| BTG3      | 10950  | BTG family, member 3 (BTG3), mRNA.                                                               | 0.10  | 7.68  | 4.48E-12 | 1.26E-11 | turquoise |
| BTK       | 695    | Bruton agammaglobulinemia tyrosine kinase (BTK), mRNA.                                           | 0.40  | 5.92  | 2.93E-46 | 4.02E-45 | turquoise |
| BTLA      | 151888 | B and T lymphocyte associated (BTLA), mRNA.                                                      | 0.02  | 6.45  | 7.78E-02 | 9.89E-02 | turquoise |
| BUB3      | 9184   | BUB3 budding uninhibited by benzimidazoles 3 homolog (yeast) (BUB3), transcript variant 1, mRNA. | 0.14  | 7.52  | 2.46E-17 | 9.24E-17 | turquoise |
| C10orf99  | 387695 | chromosome 10 open reading frame 99 (C10orf99), mRNA.                                            | 0.01  | 11.69 | 5.13E-01 | 5.58E-01 | turquoise |
| C11orf74  | 119710 | chromosome 11 open reading frame 74 (C11orf74), mRNA.                                            | 0.50  | 8.28  | 7.09E-54 | 1.32E-52 | turquoise |
| C12orf45  | 121053 | chromosome 12 open reading frame 45 (C12orf45), mRNA.                                            | -0.08 | 7.71  | 8.06E-07 | 1.65E-06 | turquoise |
| C12orf5   | 57103  | chromosome 12 open reading frame 5 (C12orf5), mRNA.                                              | 0.02  | 8.35  | 2.48E-01 | 2.89E-01 | turquoise |
| C12orf75  | 387882 | hypothetical protein (LOC387882), mRNA.                                                          | 0.08  | 11.29 | 1.85E-09 | 4.50E-09 | turquoise |
| C16orf87  | 388272 | similar to RIKEN cDNA 4921524J17 (LOC388272), mRNA.                                              | 0.15  | 7.52  | 1.41E-18 | 5.60E-18 | turquoise |
| C18orf8   | 29919  | chromosome 18 open reading frame 8 (C18orf8), mRNA.                                              | 0.12  | 7.71  | 7.97E-09 | 1.87E-08 | turquoise |
| C1GALT1C1 | 29071  | C1GALT1-specific chaperone 1 (C1GALT1C1), transcript variant 1, mRNA.                            | 0.06  | 5.32  | 7.57E-04 | 1.21E-03 | turquoise |

|         |        |                                                                               |       |       |          |          |           |
|---------|--------|-------------------------------------------------------------------------------|-------|-------|----------|----------|-----------|
| C1orf54 | 79630  | chromosome 1 open reading frame 54 (C1orf54), mRNA.                           | 0.08  | 8.29  | 8.70E-14 | 2.70E-13 | turquoise |
| C4orf32 | 132720 | chromosome 4 open reading frame 32 (C4orf32), mRNA.                           | 0.11  | 9.31  | 1.46E-14 | 4.73E-14 | turquoise |
| C5orf15 | 56951  | chromosome 5 open reading frame 15 (C5orf15), mRNA.                           | 0.15  | 9.21  | 3.66E-16 | 1.29E-15 | turquoise |
| CA2     | 760    | carbonic anhydrase II (CA2), mRNA.                                            | 0.31  | 8.94  | 2.76E-45 | 3.57E-44 | turquoise |
| CABLES1 | 91768  | Cdk5 and Abl enzyme substrate 1 (CABLES1), mRNA.                              | -0.61 | 7.70  | 1.51E-78 | 1.23E-76 | turquoise |
| CACNA1E | 777    | calcium channel, voltage-dependent, R type, alpha 1E subunit (CACNA1E), mRNA. | 0.25  | 10.03 | 8.64E-43 | 9.99E-42 | turquoise |
| CADM1   | 23705  | cell adhesion molecule 1 (CADM1), mRNA.                                       | 0.21  | 7.39  | 1.38E-24 | 7.36E-24 | turquoise |
| CALD1   | 800    | caldesmon 1 (CALD1), transcript variant 5, mRNA.                              | -0.05 | 7.24  | 1.58E-06 | 3.17E-06 | turquoise |
| CALM1   | 801    | calmodulin 1 (phosphorylase kinase, delta) (CALM1), mRNA.                     | 0.03  | 5.64  | 7.40E-02 | 9.43E-02 | turquoise |
| CAMLG   | 819    | calcium modulating ligand (CAMLG), mRNA.                                      | 0.09  | 10.58 | 6.13E-10 | 1.53E-09 | turquoise |
| CAMP    | 820    | cathelicidin antimicrobial peptide (CAMP), mRNA.                              | 0.18  | 7.20  | 8.27E-20 | 3.50E-19 | turquoise |
| CAPG    | 822    | capping protein (actin filament), gelsolin-like (CAPG), mRNA.                 | 0.56  | 6.90  | 4.65E-63 | 1.52E-61 | turquoise |

|          |        |                                                                                          |       |       |          |          |           |
|----------|--------|------------------------------------------------------------------------------------------|-------|-------|----------|----------|-----------|
| CASP4    | 837    | caspase 4, apoptosis-related cysteine peptidase (CASP4), transcript variant alpha, mRNA. | -0.23 | 7.52  | 2.14E-26 | 1.23E-25 | turquoise |
| CASP6    | 839    | caspase 6, apoptosis-related cysteine peptidase (CASP6), transcript variant alpha, mRNA. | -0.30 | 10.07 | 3.64E-53 | 6.41E-52 | turquoise |
| CAST     | 831    | calpastatin (CAST), transcript variant 7, mRNA.                                          | 0.23  | 6.98  | 1.91E-31 | 1.31E-30 | turquoise |
| CAV1     | 857    | caveolin 1, caveolae protein, 22kDa (CAV1), mRNA.                                        | 0.18  | 8.36  | 2.21E-20 | 9.59E-20 | turquoise |
| CBX2     | 84733  | chromobox homolog 2 (Pc class homolog, Drosophila) (CBX2), transcript variant 1, mRNA.   | 0.04  | 9.61  | 2.56E-02 | 3.46E-02 | turquoise |
| CBX6     | 23466  | chromobox homolog 6 (CBX6), mRNA.                                                        | -0.12 | 8.37  | 7.72E-18 | 2.97E-17 | turquoise |
| CCDC102A | 92922  | coiled-coil domain containing 102A (CCDC102A), mRNA.                                     | -0.01 | 7.73  | 3.63E-01 | 4.08E-01 | turquoise |
| CCDC109B | 55013  | coiled-coil domain containing 109B (CCDC109B), mRNA.                                     | 0.01  | 8.28  | 5.05E-01 | 5.51E-01 | turquoise |
| CCDC117  | 150275 | coiled-coil domain containing 117 (CCDC117), mRNA.                                       | 0.00  | 11.86 | 7.75E-01 | 8.04E-01 | turquoise |
| CCDC28A  | 25901  | coiled-coil domain containing 28A (CCDC28A), mRNA.                                       | -0.01 | 7.80  | 4.17E-01 | 4.63E-01 | turquoise |
| CCDC34   | 91057  | coiled-coil domain containing 34 (CCDC34), transcript variant 1, mRNA.                   | -0.38 | 9.15  | 1.30E-57 | 3.03E-56 | turquoise |

|         |        |                                                                                                                                                                                                                       |       |       |          |          |           |
|---------|--------|-----------------------------------------------------------------------------------------------------------------------------------------------------------------------------------------------------------------------|-------|-------|----------|----------|-----------|
| CCDC6   | 8030   | coiled-coil domain containing 6 (CCDC6), mRNA.                                                                                                                                                                        | 0.06  | 6.90  | 1.97E-04 | 3.33E-04 | turquoise |
| CCDC71  | 64925  | coiled-coil domain containing 71 (CCDC71), mRNA.                                                                                                                                                                      | 0.05  | 10.01 | 1.70E-02 | 2.35E-02 | turquoise |
| CCL22   | 6367   | chemokine (C-C motif) ligand 22 (CCL22), mRNA.                                                                                                                                                                        | -0.05 | 6.23  | 2.58E-03 | 3.90E-03 | turquoise |
| CCL3    | 6348   | chemokine (C-C motif) ligand 3 (CCL3), mRNA.                                                                                                                                                                          | -0.06 | 7.90  | 1.08E-07 | 2.35E-07 | turquoise |
| CCL3L1  | 728830 | PREDICTED: similar to Small inducible cytokine A3-like 1 precursor (Tonsillar lymphocyte LD78 beta protein) (LD78-beta(1-70)) (G0/G1 switch regulatory protein 19-2) (G0S19-2 protein) (PAT 464.2) (LOC728830), mRNA. | -0.04 | 7.59  | 3.76E-02 | 4.99E-02 | turquoise |
| CCL5    | 6352   | chemokine (C-C motif) ligand 5 (CCL5), mRNA.                                                                                                                                                                          | -0.04 | 7.04  | 3.80E-02 | 5.03E-02 | turquoise |
| CCNA1   | 8900   | cyclin A1 (CCNA1), mRNA.                                                                                                                                                                                              | -0.06 | 9.39  | 2.79E-07 | 5.90E-07 | turquoise |
| CCNDBP1 | 23582  | cyclin D-type binding-protein 1 (CCNDBP1), transcript variant 2, mRNA.                                                                                                                                                | 0.07  | 11.23 | 8.79E-14 | 2.72E-13 | turquoise |
| CCT2    | 10576  | chaperonin containing TCP1, subunit 2 (beta) (CCT2), mRNA.                                                                                                                                                            | 0.18  | 5.60  | 4.06E-14 | 1.29E-13 | turquoise |
| CCT5    | 22948  | chaperonin containing TCP1, subunit 5 (epsilon) (CCT5), mRNA.                                                                                                                                                         | 0.14  | 7.87  | 2.18E-12 | 6.26E-12 | turquoise |
| CD160   | 11126  | CD160 molecule (CD160), mRNA.                                                                                                                                                                                         | -0.05 | 10.96 | 8.40E-05 | 1.48E-04 | turquoise |
| CD19    | 930    | CD19 molecule (CD19), mRNA.                                                                                                                                                                                           | 0.02  | 9.68  | 1.22E-01 | 1.50E-01 | turquoise |



|        |       |                                                                                      |       |       |          |          |           |
|--------|-------|--------------------------------------------------------------------------------------|-------|-------|----------|----------|-----------|
| CD200  | 4345  | CD200 molecule (CD200), transcript variant 1, mRNA.                                  | 0.02  | 11.94 | 1.78E-01 | 2.13E-01 | turquoise |
| CD22   | 933   | CD22 molecule (CD22), mRNA.                                                          | 0.02  | 11.97 | 2.54E-01 | 2.96E-01 | turquoise |
| CD300A | 11314 | CD300a molecule (CD300A), mRNA.                                                      | -0.12 | 5.66  | 5.62E-17 | 2.08E-16 | turquoise |
| CD37   | 951   | CD37 molecule (CD37), transcript variant 2, mRNA.                                    | 0.44  | 7.78  | 2.37E-55 | 4.86E-54 | turquoise |
| CD40   | 958   | CD40 molecule, TNF receptor superfamily member 5 (CD40), transcript variant 1, mRNA. | -0.03 | 7.03  | 8.27E-02 | 1.05E-01 | turquoise |
| CD44   | 960   | CD44 molecule (Indian blood group) (CD44), transcript variant 2, mRNA.               | 0.01  | 6.79  | 5.53E-01 | 5.97E-01 | turquoise |
| CD48   | 962   | CD48 molecule (CD48), mRNA.                                                          | -0.04 | 6.89  | 1.21E-03 | 1.90E-03 | turquoise |
| CD53   | 963   | CD53 molecule (CD53), transcript variant 1, mRNA.                                    | -0.47 | 6.46  | 3.62E-45 | 4.65E-44 | turquoise |
| CD59   | 966   | CD59 molecule, complement regulatory protein (CD59), transcript variant 2, mRNA.     | -0.06 | 8.08  | 1.36E-07 | 2.94E-07 | turquoise |
| CD70   | 970   | CD70 molecule (CD70), mRNA.                                                          | -0.04 | 9.66  | 4.12E-03 | 6.11E-03 | turquoise |
| CD80   | 941   | CD80 molecule (CD80), mRNA.                                                          | 0.10  | 6.96  | 2.30E-09 | 5.56E-09 | turquoise |
| CD83   | 9308  | CD83 molecule (CD83), transcript variant 2, mRNA.                                    | 0.03  | 7.99  | 9.51E-02 | 1.19E-01 | turquoise |
| CD84   | 8832  | CD84 molecule (CD84), mRNA.                                                          | 0.14  | 7.16  | 3.17E-15 | 1.06E-14 | turquoise |
| CD99L2 | 83692 | CD99 molecule-like 2 (CD99L2), transcript variant 1, mRNA.                           | -0.10 | 8.92  | 1.90E-14 | 6.11E-14 | turquoise |
| CDC34  | 997   | cell division cycle 34 homolog ( <i>S. cerevisiae</i> ) (CDC34), mRNA.               | -0.13 | 7.13  | 2.08E-10 | 5.36E-10 | turquoise |

|         |        |                                                                                 |       |       |          |          |           |
|---------|--------|---------------------------------------------------------------------------------|-------|-------|----------|----------|-----------|
| CDC37L1 | 55664  | cell division cycle 37 homolog (S. cerevisiae)-like 1 (CDC37L1), mRNA.          | 0.53  | 6.15  | 1.72E-47 | 2.49E-46 | turquoise |
| CDK6    | 1021   | cyclin-dependent kinase 6 (CDK6), mRNA.                                         | -0.01 | 8.14  | 5.26E-01 | 5.70E-01 | turquoise |
| CDS2    | 8760   | CDP-diacylglycerol synthase (phosphatidate cytidyltransferase) 2 (CDS2), mRNA.  | -0.08 | 9.98  | 2.31E-07 | 4.92E-07 | turquoise |
| CEBPD   | 1052   | CCAAT/enhancer binding protein (C/EBP), delta (CEBPD), mRNA.                    | 0.03  | 8.27  | 1.12E-01 | 1.39E-01 | turquoise |
| CELF2   | 10659  | CUG triplet repeat, RNA binding protein 2 (CUGBP2), transcript variant 3, mRNA. | 0.01  | 7.07  | 4.60E-01 | 5.06E-01 | turquoise |
| CEP70   | 80321  | centrosomal protein 70kDa (CEP70), mRNA.                                        | -0.05 | 6.85  | 6.86E-05 | 1.21E-04 | turquoise |
| CERK    | 64781  | ceramide kinase (CERK), transcript variant 1, mRNA.                             | -0.04 | 8.57  | 1.47E-02 | 2.04E-02 | turquoise |
| CERS6   | 253782 | LAG1 homolog, ceramide synthase 6 (S. cerevisiae) (LASS6), mRNA.                | 0.03  | 7.61  | 1.53E-02 | 2.13E-02 | turquoise |
| CH25H   | 9023   | cholesterol 25-hydroxylase (CH25H), mRNA.                                       | -0.07 | 6.64  | 6.01E-05 | 1.07E-04 | turquoise |
| CHD9    | 80205  | chromodomain helicase DNA binding protein 9 (CHD9), mRNA.                       | 0.04  | 7.15  | 7.38E-03 | 1.07E-02 | turquoise |
| CHPT1   | 56994  | choline phosphotransferase 1 (CHPT1), mRNA.                                     | 0.07  | 10.89 | 1.13E-06 | 2.29E-06 | turquoise |
| CHST4   | 10164  | carbohydrate (N-acetylglucosamine 6-O) sulfotransferase 4 (CHST4), mRNA.        | -0.12 | 8.20  | 7.21E-16 | 2.51E-15 | turquoise |

|        |        |                                                                                                   |       |       |          |          |           |
|--------|--------|---------------------------------------------------------------------------------------------------|-------|-------|----------|----------|-----------|
| CHSY1  | 22856  | carbohydrate (chondroitin) synthase 1 (CHSY1), mRNA.                                              | -0.02 | 9.84  | 2.44E-01 | 2.85E-01 | turquoise |
| CIRH1A | 84916  | cirrhosis, autosomal recessive 1A (cirhin) (CIRH1A), mRNA.                                        | -0.01 | 7.37  | 3.55E-01 | 4.00E-01 | turquoise |
| CITED2 | 10370  | Cbp/p300-interacting transactivator, with Glu/Asp-rich carboxy-terminal domain, 2 (CITED2), mRNA. | 0.25  | 9.28  | 1.85E-44 | 2.30E-43 | turquoise |
| CLASP1 | 23332  | cytoplasmic linker associated protein 1 (CLASP1), mRNA.                                           | -0.10 | 10.43 | 1.74E-14 | 5.60E-14 | turquoise |
| CLC    | 1178   | Charcot-Leyden crystal protein (CLC), mRNA.                                                       | -0.42 | 7.06  | 3.99E-68 | 1.63E-66 | turquoise |
| CLDND1 | 56650  | claudin domain containing 1 (CLDND1), transcript variant 2, mRNA.                                 | -0.11 | 8.84  | 2.87E-11 | 7.74E-11 | turquoise |
| CLECL1 | 160365 | dendritic cell-associated lectin-1 (DCAL1), mRNA.                                                 | -0.02 | 8.22  | 1.22E-01 | 1.51E-01 | turquoise |
| CLIP2  | 7461   | CAP-GLY domain containing linker protein 2 (CLIP2), transcript variant 1, mRNA.                   | 0.01  | 6.80  | 4.22E-01 | 4.68E-01 | turquoise |
| CMC2   | 56942  | chromosome 16 open reading frame 61 (C16orf61), mRNA.                                             | 0.02  | 6.09  | 1.25E-01 | 1.54E-01 | turquoise |
| CMTM6  | 54918  | CKLF-like MARVEL transmembrane domain containing 6 (CMTM6), mRNA.                                 | 0.13  | 8.31  | 6.50E-16 | 2.27E-15 | turquoise |
| CNDP2  | 55748  | CNDP dipeptidase 2 (metallopeptidase M20 family) (CNDP2), mRNA.                                   | -0.09 | 6.50  | 3.54E-07 | 7.44E-07 | turquoise |

|         |        |                                                                          |       |       |          |          |           |
|---------|--------|--------------------------------------------------------------------------|-------|-------|----------|----------|-----------|
| CNKS3   | 154043 | CNKS3 family member 3 (CNKS3), mRNA.                                     | 0.04  | 9.09  | 4.50E-04 | 7.40E-04 | turquoise |
| CNNM3   | 26505  | cyclin M3 (CNNM3), transcript variant 1, mRNA.                           | -0.32 | 6.82  | 7.11E-46 | 9.55E-45 | turquoise |
| CNR1    | 1268   | cannabinoid receptor 1 (brain) (CNR1), transcript variant 1, mRNA.       | 0.00  | 10.24 | 9.09E-01 | 9.24E-01 | turquoise |
| CNST    | 163882 | chromosome 1 open reading frame 71 (C1orf71), mRNA.                      | -0.20 | 8.96  | 7.96E-35 | 6.28E-34 | turquoise |
| COCH    | 1690   | coagulation factor C homolog, cochlin (Limulus polyphemus) (COCH), mRNA. | -0.08 | 10.01 | 5.29E-11 | 1.41E-10 | turquoise |
| COL24A1 | 255631 | collagen, type XXIV, alpha 1 (COL24A1), mRNA.                            | -0.04 | 6.45  | 1.27E-02 | 1.78E-02 | turquoise |
| COQ10B  | 80219  | coenzyme Q10 homolog B (S. cerevisiae) (COQ10B), mRNA.                   | 0.06  | 6.84  | 8.42E-04 | 1.34E-03 | turquoise |
| COQ2    | 27235  | coenzyme Q2 homolog, prenyltransferase (yeast) (COQ2), mRNA.             | -0.04 | 8.00  | 2.12E-03 | 3.23E-03 | turquoise |
| CORO1C  | 23603  | coronin, actin binding protein, 1C (CORO1C), mRNA.                       | 0.04  | 8.39  | 2.16E-04 | 3.65E-04 | turquoise |
| COX20   | 116228 | family with sequence similarity 36, member A (FAM36A), mRNA.             | 0.01  | 5.58  | 7.21E-01 | 7.53E-01 | turquoise |
| CPD     | 1362   | carboxypeptidase D (CPD), mRNA.                                          | -0.15 | 8.00  | 1.83E-13 | 5.60E-13 | turquoise |
| CPNE1   | 8904   | copine I (CPNE1), transcript variant 1, mRNA.                            | -0.19 | 10.84 | 3.79E-34 | 2.90E-33 | turquoise |
| CPNE8   | 144402 | copine VIII (CPNE8), mRNA.                                               | -0.08 | 7.80  | 3.63E-08 | 8.14E-08 | turquoise |

|         |        |                                                                                                                           |       |      |          |          |           |
|---------|--------|---------------------------------------------------------------------------------------------------------------------------|-------|------|----------|----------|-----------|
| CPOX    | 1371   | coproporphyrinogen oxidase (CPOX), mRNA.                                                                                  | 0.09  | 6.11 | 3.69E-07 | 7.73E-07 | turquoise |
| CR2     | 1380   | complement component (3d/Epstein Barr virus) receptor 2 (CR2), transcript variant 2, mRNA.                                | 0.14  | 9.81 | 9.59E-22 | 4.44E-21 | turquoise |
| CREB3L2 | 64764  | cAMP responsive element binding protein 3-like 2 (CREB3L2), mRNA.                                                         | 0.05  | 9.30 | 7.35E-04 | 1.18E-03 | turquoise |
| CRIPT   | 9419   | cysteine-rich PDZ-binding protein (CRIPT), mRNA.                                                                          | 0.00  | 6.23 | 8.97E-01 | 9.13E-01 | turquoise |
| CSK     | 1445   | c-src tyrosine kinase (CSK), mRNA.                                                                                        | 0.06  | 7.04 | 1.35E-03 | 2.11E-03 | turquoise |
| CTBS    | 1486   | chitobiase, di-N-acetyl- (CTBS), mRNA.                                                                                    | -0.13 | 6.22 | 5.24E-16 | 1.84E-15 | turquoise |
| CTDSP1  | 58190  | CTD (carboxy-terminal domain, RNA polymerase II, polypeptide A) small phosphatase 1 (CTDSP1), transcript variant 1, mRNA. | -0.08 | 5.85 | 7.03E-07 | 1.45E-06 | turquoise |
| CTHRC1  | 115908 | collagen triple helix repeat containing 1 (CTHRC1), mRNA.                                                                 | -0.09 | 5.70 | 1.52E-07 | 3.27E-07 | turquoise |
| CTNNAL1 | 8727   | catenin (cadherin-associated protein), alpha-like 1 (CTNNAL1), mRNA.                                                      | -0.08 | 6.66 | 2.89E-08 | 6.51E-08 | turquoise |
| CTSZ    | 1522   | cathepsin Z (CTSZ), mRNA.                                                                                                 | 0.34  | 7.40 | 6.84E-40 | 6.81E-39 | turquoise |
| CWC27   | 10283  | serologically defined colon cancer antigen 10 (SDCCAG10), mRNA.                                                           | -0.24 | 8.01 | 4.08E-21 | 1.83E-20 | turquoise |

|          |        |                                                                                                                           |       |       |          |          |           |
|----------|--------|---------------------------------------------------------------------------------------------------------------------------|-------|-------|----------|----------|-----------|
| CXCL10   | 3627   | chemokine (C-X-C motif) ligand 10 (CXCL10), mRNA.                                                                         | -0.02 | 9.83  | 2.47E-01 | 2.88E-01 | turquoise |
| CXCL12   | 6387   | chemokine (C-X-C motif) ligand 12 (stromal cell-derived factor 1) (CXCL12), transcript variant 1, mRNA.                   | -0.02 | 12.66 | 2.41E-01 | 2.81E-01 | turquoise |
| CXCL13   | 10563  | chemokine (C-X-C motif) ligand 13 (B-cell chemoattractant) (CXCL13), mRNA.                                                | -0.06 | 7.48  | 6.06E-09 | 1.44E-08 | turquoise |
| CXCR3    | 2833   | chemokine (C-X-C motif) receptor 3 (CXCR3), mRNA.                                                                         | -0.01 | 5.49  | 3.88E-01 | 4.33E-01 | turquoise |
| CXCR4    | 7852   | chemokine (C-X-C motif) receptor 4 (CXCR4), transcript variant 2, mRNA.                                                   | -0.07 | 10.89 | 9.88E-07 | 2.01E-06 | turquoise |
| CXCR5    | 643    | Burkitt lymphoma receptor 1, GTP binding protein (chemokine (C-X-C motif) receptor 5) (BLR1), transcript variant 1, mRNA. | 0.05  | 7.08  | 1.78E-03 | 2.75E-03 | turquoise |
| CXorf57  | 55086  | chromosome X open reading frame 57 (CXorf57), mRNA.                                                                       | -0.12 | 6.07  | 2.20E-13 | 6.67E-13 | turquoise |
| CXXC4    | 80319  | CXXC finger 4 (CXXC4), mRNA.                                                                                              | -0.04 | 5.67  | 8.61E-03 | 1.24E-02 | turquoise |
| CYB561A3 | 220002 | cytochrome b, ascorbate dependent 3 (CYBASC3), mRNA.                                                                      | 0.01  | 6.06  | 4.88E-01 | 5.33E-01 | turquoise |
| CYBB     | 1536   | cytochrome b-245, beta polypeptide (chronic granulomatous disease) (CYBB), mRNA.                                          | -0.12 | 7.60  | 2.28E-23 | 1.14E-22 | turquoise |

|         |        |                                                                                                       |       |       |          |          |           |
|---------|--------|-------------------------------------------------------------------------------------------------------|-------|-------|----------|----------|-----------|
| CYBRD1  | 79901  | cytochrome b reductase 1 (CYBRD1), mRNA.                                                              | 0.06  | 10.77 | 9.21E-11 | 2.41E-10 | turquoise |
| CYP1B1  | 1545   | cytochrome P450, family 1, subfamily B, polypeptide 1 (CYP1B1), mRNA.                                 | -0.14 | 9.25  | 4.19E-17 | 1.56E-16 | turquoise |
| CYP26A1 | 1592   | cytochrome P450, family 26, subfamily A, polypeptide 1 (CYP26A1), transcript variant 1, mRNA.         | 0.02  | 8.89  | 1.84E-01 | 2.20E-01 | turquoise |
| CYP2R1  | 120227 | cytochrome P450, family 2, subfamily R, polypeptide 1 (CYP2R1), mRNA.                                 | 0.05  | 8.90  | 6.84E-03 | 9.93E-03 | turquoise |
| CYSLTR1 | 10800  | cysteinyl leukotriene receptor 1 (CYSLTR1), mRNA.                                                     | -0.08 | 8.66  | 1.04E-05 | 1.97E-05 | turquoise |
| CYTH1   | 9267   | pleckstrin homology, Sec7 and coiled-coil domains 1(cytohesin 1) (PSCD1), transcript variant 1, mRNA. | -0.01 | 11.91 | 4.61E-01 | 5.07E-01 | turquoise |
| CYTIP   | 9595   | pleckstrin homology, Sec7 and coiled-coil domains, binding protein (PSCDBP), mRNA.                    | -0.07 | 7.13  | 2.88E-04 | 4.82E-04 | turquoise |
| DAAM1   | 23002  | dishevelled associated activator of morphogenesis 1 (DAAM1), mRNA.                                    | -0.02 | 7.90  | 1.73E-01 | 2.08E-01 | turquoise |
| DARS    | 1615   | aspartyl-tRNA synthetase (DARS), mRNA.                                                                | 0.00  | 9.54  | 9.17E-01 | 9.30E-01 | turquoise |
| DBN1    | 1627   | drebrin 1 (DBN1), transcript variant 2, mRNA.                                                         | 0.03  | 10.78 | 2.30E-02 | 3.13E-02 | turquoise |

|         |       |                                                                                                        |       |       |          |          |           |
|---------|-------|--------------------------------------------------------------------------------------------------------|-------|-------|----------|----------|-----------|
| DCTPP1  | 79077 | XTP3-transactivated protein A (XTP3TPA), mRNA.                                                         | 0.05  | 7.16  | 7.63E-03 | 1.10E-02 | turquoise |
| DCUN1D5 | 84259 | DCN1, defective in cullin neddylation 1, domain containing 5 ( <i>S. cerevisiae</i> ) (DCUN1D5), mRNA. | -0.08 | 7.78  | 3.67E-07 | 7.70E-07 | turquoise |
| DDA1    | 79016 | chromosome 19 open reading frame 58 (C19orf58), mRNA.                                                  | 0.25  | 7.52  | 1.10E-16 | 4.00E-16 | turquoise |
| DDB2    | 1643  | damage-specific DNA binding protein 2, 48kDa (DDB2), mRNA.                                             | 0.37  | 8.33  | 1.23E-48 | 1.87E-47 | turquoise |
| DDIT4   | 54541 | DNA-damage-inducible transcript 4 (DDIT4), mRNA.                                                       | -0.40 | 6.60  | 7.73E-47 | 1.09E-45 | turquoise |
| DDR2    | 4921  | discoidin domain receptor family, member 2 (DDR2), transcript variant 2, mRNA.                         | 0.08  | 5.80  | 1.62E-06 | 3.25E-06 | turquoise |
| DDX1    | 1653  | DEAD (Asp-Glu-Ala-Asp) box polypeptide 1 (DDX1), mRNA.                                                 | 0.04  | 5.56  | 1.21E-02 | 1.71E-02 | turquoise |
| DDX18   | 8886  | DEAD (Asp-Glu-Ala-Asp) box polypeptide 18 (DDX18), mRNA.                                               | 0.05  | 8.75  | 1.96E-03 | 3.02E-03 | turquoise |
| DDX5    | 1655  | DEAD (Asp-Glu-Ala-Asp) box polypeptide 5 (DDX5), mRNA.                                                 | -0.02 | 11.59 | 6.17E-01 | 6.58E-01 | turquoise |
| DDX59   | 83479 | DEAD (Asp-Glu-Ala-Asp) box polypeptide 59 (DDX59), transcript variant 1, mRNA.                         | -0.38 | 7.80  | 3.40E-41 | 3.59E-40 | turquoise |



|         |        |                                                                                                |       |      |          |          |           |
|---------|--------|------------------------------------------------------------------------------------------------|-------|------|----------|----------|-----------|
| DENND1B | 54530  | hypothetical protein FLJ20054 (FLJ20054), mRNA.                                                | 0.02  | 5.45 | 2.09E-01 | 2.47E-01 | turquoise |
| DENND5B | 160518 | hypothetical protein MGC24039 (MGC24039), mRNA.                                                | 0.01  | 8.74 | 2.44E-01 | 2.85E-01 | turquoise |
| DERA    | 51071  | 2-deoxyribose-5-phosphate aldolase homolog (C. elegans) (DERA), mRNA.                          | 0.00  | 8.25 | 8.51E-01 | 8.73E-01 | turquoise |
| DGCR8   | 54487  | DiGeorge syndrome critical region gene 8 (DGCR8), mRNA.                                        | -0.12 | 7.44 | 7.76E-17 | 2.85E-16 | turquoise |
| DGKD    | 8527   | diacylglycerol kinase, delta 130kDa (DGKD), transcript variant 1, mRNA.                        | -0.09 | 7.96 | 1.02E-02 | 1.45E-02 | turquoise |
| DHCR24  | 1718   | 24-dehydrocholesterol reductase (DHCR24), mRNA.                                                | -0.08 | 7.15 | 1.91E-07 | 4.09E-07 | turquoise |
| DHRS3   | 9249   | dehydrogenase/reductase (SDR family) member 3 (DHRS3), mRNA.                                   | 0.05  | 7.46 | 9.79E-04 | 1.55E-03 | turquoise |
| DIMT1   | 27292  | DIM1 dimethyladenosine transferase 1-like (S. cerevisiae) (DIMT1L), mRNA.                      | -0.01 | 8.67 | 5.49E-01 | 5.93E-01 | turquoise |
| DNAJA1  | 3301   | DnaJ (Hsp40) homolog, subfamily A, member 1 (DNAJA1), mRNA.                                    | 0.32  | 7.12 | 6.67E-32 | 4.69E-31 | turquoise |
| DNAJB6  | 387820 | PREDICTED: similar to DnaJ (Hsp40) homolog, subfamily B, member 6 isoform a (LOC387820), mRNA. | -0.16 | 7.52 | 1.38E-18 | 5.51E-18 | turquoise |

|          |       |                                                                                 |       |       |          |          |           |
|----------|-------|---------------------------------------------------------------------------------|-------|-------|----------|----------|-----------|
| DNAJC5B  | 85479 | DnaJ (Hsp40) homolog, subfamily C, member 5 beta (DNAJC5B), mRNA.               | -0.04 | 6.66  | 2.09E-02 | 2.85E-02 | turquoise |
| DNASE1L3 | 1776  | deoxyribonuclease I-like 3 (DNASE1L3), mRNA.                                    | -0.03 | 9.53  | 6.49E-03 | 9.44E-03 | turquoise |
| DOCK7    | 85440 | dedicator of cytokinesis 7 (DOCK7), mRNA.                                       | 0.17  | 11.51 | 2.98E-26 | 1.70E-25 | turquoise |
| DPYSL2   | 1808  | dihydropyrimidinase-like 2 (DPYSL2), mRNA.                                      | -0.18 | 9.35  | 7.00E-32 | 4.92E-31 | turquoise |
| DRAM1    | 55332 | damage-regulated autophagy modulator (DRAM), mRNA.                              | -0.23 | 10.40 | 6.15E-36 | 5.14E-35 | turquoise |
| DSE      | 29940 | dermatan sulfate epimerase (DSE), transcript variant 2, mRNA.                   | -0.09 | 8.04  | 2.31E-12 | 6.61E-12 | turquoise |
| DSTN     | 11034 | destrin (actin depolymerizing factor) (DSTN), transcript variant 2, mRNA.       | 0.11  | 7.13  | 2.29E-12 | 6.54E-12 | turquoise |
| DTL      | 51514 | denticleless homolog (Drosophila) (DTL), mRNA.                                  | 0.05  | 7.89  | 1.60E-04 | 2.73E-04 | turquoise |
| DUSP11   | 8446  | dual specificity phosphatase 11 (RNA/RNP complex 1-interacting) (DUSP11), mRNA. | 0.05  | 8.46  | 4.79E-05 | 8.57E-05 | turquoise |
| DUSP2    | 1844  | dual specificity phosphatase 2 (DUSP2), mRNA.                                   | -0.09 | 9.18  | 1.91E-10 | 4.91E-10 | turquoise |
| DUSP22   | 56940 | dual specificity phosphatase 22 (DUSP22), mRNA.                                 | -0.36 | 8.44  | 1.52E-32 | 1.10E-31 | turquoise |
| DUSP4    | 1846  | dual specificity phosphatase 4 (DUSP4), transcript variant 1, mRNA.             | -0.06 | 9.70  | 7.16E-06 | 1.37E-05 | turquoise |

|         |        |                                                                                                                       |       |       |          |          |           |
|---------|--------|-----------------------------------------------------------------------------------------------------------------------|-------|-------|----------|----------|-----------|
| DYNC1H1 | 1778   | dynein, cytoplasmic 1, heavy chain 1 (DYNC1H1), mRNA.                                                                 | -0.01 | 8.22  | 7.18E-01 | 7.51E-01 | turquoise |
| DYNLL1  | 8655   | dynein, cytoplasmic, light polypeptide 1 (DNCL1), mRNA.                                                               | 0.02  | 7.81  | 3.20E-01 | 3.65E-01 | turquoise |
| DYRK2   | 8445   | dual-specificity tyrosine-(Y)-phosphorylation regulated kinase 2 (DYRK2), transcript variant 2, mRNA.                 | 0.01  | 12.29 | 3.09E-01 | 3.53E-01 | turquoise |
| DYRK3   | 8444   | dual-specificity tyrosine-(Y)-phosphorylation regulated kinase 3 (DYRK3), transcript variant 2, mRNA.                 | 0.05  | 10.84 | 3.07E-03 | 4.61E-03 | turquoise |
| E2F2    | 1870   | E2F transcription factor 2 (E2F2), mRNA.                                                                              | -0.02 | 9.80  | 6.55E-02 | 8.42E-02 | turquoise |
| E2F5    | 1875   | E2F transcription factor 5, p130-binding (E2F5), mRNA.                                                                | -0.02 | 11.61 | 1.20E-01 | 1.48E-01 | turquoise |
| E2F7    | 144455 | E2F transcription factor 7 (E2F7), mRNA.                                                                              | -0.01 | 7.30  | 3.96E-01 | 4.42E-01 | turquoise |
| EBF1    | 1879   | early B-cell factor 1 (EBF1), mRNA.                                                                                   | -0.02 | 7.88  | 7.98E-02 | 1.01E-01 | turquoise |
| ECHS1   | 1892   | enoyl Coenzyme A hydratase, short chain, 1, mitochondrial (ECHS1), nuclear gene encoding mitochondrial protein, mRNA. | 0.09  | 7.11  | 5.46E-09 | 1.30E-08 | turquoise |
| EDEM1   | 9695   | ER degradation enhancer, mannosidase alpha-like 1 (EDEM1), mRNA.                                                      | -0.09 | 8.81  | 2.22E-10 | 5.71E-10 | turquoise |

|        |       |                                                                                                                |       |       |          |          |           |
|--------|-------|----------------------------------------------------------------------------------------------------------------|-------|-------|----------|----------|-----------|
| EDN1   | 1906  | endothelin 1 (EDN1), mRNA.                                                                                     | 0.18  | 10.86 | 5.17E-23 | 2.54E-22 | turquoise |
| EED    | 8726  | embryonic ectoderm development (EED), transcript variant 2, mRNA.                                              | -0.11 | 7.60  | 2.61E-11 | 7.06E-11 | turquoise |
| EEF1A2 | 1917  | eukaryotic translation elongation factor 1 alpha 2 (EEF1A2), mRNA.                                             | 0.00  | 7.31  | 8.44E-01 | 8.66E-01 | turquoise |
| EEF1E1 | 9521  | eukaryotic translation elongation factor 1 epsilon 1 (EEF1E1), mRNA.                                           | -0.10 | 7.56  | 1.59E-07 | 3.42E-07 | turquoise |
| EFR3A  | 23167 | KIAA0143 protein (KIAA0143), mRNA.                                                                             | -0.21 | 9.50  | 7.45E-42 | 8.17E-41 | turquoise |
| EGFL6  | 25975 | EGF-like-domain, multiple 6 (EGFL6), mRNA.                                                                     | 0.09  | 7.53  | 1.71E-09 | 4.16E-09 | turquoise |
| EGR2   | 1959  | early growth response 2 (Krox-20 homolog, Drosophila) (EGR2), mRNA.                                            | -0.04 | 8.28  | 1.04E-04 | 1.81E-04 | turquoise |
| EHBP1  | 23301 | EH domain binding protein 1 (EHBP1), mRNA.                                                                     | -0.01 | 7.77  | 5.49E-01 | 5.93E-01 | turquoise |
| EHD4   | 30844 | EH-domain containing 4 (EHD4), mRNA.                                                                           | 0.12  | 8.20  | 1.32E-08 | 3.04E-08 | turquoise |
| ELL3   | 80237 | elongation factor RNA polymerase II-like 3 (ELL3), mRNA.                                                       | -0.04 | 6.44  | 2.72E-02 | 3.67E-02 | turquoise |
| ELOVL6 | 79071 | ELOVL family member 6, elongation of long chain fatty acids (FEN1/Elo2, SUR4/Elo3-like, yeast) (ELOVL6), mRNA. | 0.12  | 11.05 | 1.76E-14 | 5.67E-14 | turquoise |

|         |       |                                                                                                     |       |       |          |          |           |
|---------|-------|-----------------------------------------------------------------------------------------------------|-------|-------|----------|----------|-----------|
| ELP3    | 55140 | elongation protein 3 homolog (S. cerevisiae) (ELP3), mRNA.                                          | 0.05  | 9.63  | 1.28E-04 | 2.21E-04 | turquoise |
| EMG1    | 10436 | EMG1 nucleolar protein homolog (S. cerevisiae) (EMG1), mRNA.                                        | -0.01 | 5.51  | 3.68E-01 | 4.14E-01 | turquoise |
| ENC1    | 8507  | ectodermal-neural cortex (with BTB-like domain) (ENC1), mRNA.                                       | 0.02  | 10.62 | 8.13E-02 | 1.03E-01 | turquoise |
| ENPP2   | 5168  | ectonucleotide pyrophosphatase/phosphodiesterase 2 (autotaxin) (ENPP2), transcript variant 1, mRNA. | 0.03  | 8.03  | 9.75E-02 | 1.22E-01 | turquoise |
| ENPP4   | 22875 | ectonucleotide pyrophosphatase/phosphodiesterase 4 (putative function) (ENPP4), mRNA.               | -0.14 | 9.06  | 6.49E-17 | 2.39E-16 | turquoise |
| ENPP5   | 59084 | ectonucleotide pyrophosphatase/phosphodiesterase 5 (putative function) (ENPP5), mRNA.               | 0.21  | 7.48  | 3.99E-49 | 6.12E-48 | turquoise |
| ENTPD1  | 953   | ectonucleoside triphosphate diphosphohydrolase 1 (ENTPD1), mRNA.                                    | -0.03 | 8.84  | 3.65E-02 | 4.84E-02 | turquoise |
| EPAS1   | 2034  | endothelial PAS domain protein 1 (EPAS1), mRNA.                                                     | -0.04 | 5.91  | 3.81E-03 | 5.66E-03 | turquoise |
| EPB41L2 | 2037  | erythrocyte membrane protein band 4.1-like 2 (EPB41L2), mRNA.                                       | -0.01 | 8.24  | 6.19E-01 | 6.59E-01 | turquoise |
| EPS8    | 2059  | epidermal growth factor receptor pathway substrate 8 (EPS8), mRNA.                                  | 0.11  | 6.74  | 4.92E-06 | 9.57E-06 | turquoise |

|          |        |                                                                                             |       |       |          |          |           |
|----------|--------|---------------------------------------------------------------------------------------------|-------|-------|----------|----------|-----------|
| ERAP2    | 64167  | leukocyte-derived arginine aminopeptidase (LRAP), mRNA.                                     | -0.07 | 7.94  | 1.04E-04 | 1.81E-04 | turquoise |
| ERCC6L   | 54821  | FLJ20105 protein (FLJ20105), transcript variant 2, mRNA.                                    | 0.02  | 6.28  | 2.34E-01 | 2.74E-01 | turquoise |
| ERMP1    | 79956  | KIAA1815 (KIAA1815), mRNA.                                                                  | -0.05 | 7.03  | 8.01E-04 | 1.28E-03 | turquoise |
| ETS1     | 2113   | v-ets erythroblastosis virus E26 oncogene homolog 1 (avian) (ETS1), mRNA.                   | -0.18 | 6.79  | 2.19E-20 | 9.55E-20 | turquoise |
| ETV4     | 2118   | ets variant gene 4 (E1A enhancer binding protein, E1AF) (ETV4), transcript variant 2, mRNA. | -0.08 | 7.99  | 1.82E-08 | 4.17E-08 | turquoise |
| EVL      | 51466  | Enah/Vasp-like (EVL), mRNA.                                                                 | 0.07  | 7.18  | 1.75E-06 | 3.51E-06 | turquoise |
| EZR      | 7430   | villin 2 (ezrin) (VIL2), mRNA.                                                              | 0.01  | 5.78  | 3.45E-01 | 3.90E-01 | turquoise |
| F13A1    | 2162   | coagulation factor XIII, A1 polypeptide (F13A1), mRNA.                                      | -0.09 | 6.86  | 3.07E-09 | 7.37E-09 | turquoise |
| FAIM     | 55179  | Fas apoptotic inhibitory molecule (FAIM), transcript variant 1, mRNA.                       | 0.01  | 8.46  | 4.68E-01 | 5.13E-01 | turquoise |
| FAM129C  | 199786 | family with sequence similarity 129, member C (FAM129C), mRNA.                              | 0.21  | 9.23  | 1.15E-42 | 1.33E-41 | turquoise |
| FAM133B  | 257415 | hypothetical protein MGC40405 (MGC40405), transcript variant 2, mRNA.                       | -0.03 | 7.14  | 6.93E-02 | 8.87E-02 | turquoise |
| FAM160B1 | 57700  | KIAA1600 (KIAA1600), mRNA.                                                                  | 0.04  | 10.97 | 1.11E-03 | 1.75E-03 | turquoise |

|         |        |                                                                                |       |       |          |          |           |
|---------|--------|--------------------------------------------------------------------------------|-------|-------|----------|----------|-----------|
| FAM174B | 400451 | hypothetical gene supported by AK075564; BC060873 (LOC400451), mRNA.           | -0.49 | 8.79  | 1.02E-80 | 9.59E-79 | turquoise |
| FAM20B  | 9917   | family with sequence similarity 20, member B (FAM20B), mRNA.                   | 0.00  | 9.00  | 8.47E-01 | 8.69E-01 | turquoise |
| FAM216A | 29902  | chromosome 12 open reading frame 24 (C12orf24), mRNA.                          | -0.04 | 6.92  | 1.28E-03 | 2.00E-03 | turquoise |
| FAM57A  | 79850  | family with sequence similarity 57, member A (FAM57A), mRNA.                   | -0.20 | 7.01  | 1.23E-30 | 8.12E-30 | turquoise |
| FAM60A  | 58516  | family with sequence similarity 60, member A (FAM60A), mRNA.                   | 0.25  | 7.41  | 1.79E-22 | 8.54E-22 | turquoise |
| FAM81A  | 145773 | family with sequence similarity 81, member A (FAM81A), mRNA.                   | 0.12  | 7.78  | 7.97E-15 | 2.62E-14 | turquoise |
| FAM89B  | 23625  | family with sequence similarity 89, member B (FAM89B), mRNA.                   | 0.01  | 6.87  | 5.80E-01 | 6.23E-01 | turquoise |
| FANCD2  | 2177   | Fanconi anemia, complementation group D2 (FANCD2), transcript variant 2, mRNA. | 0.00  | 12.31 | 8.07E-01 | 8.32E-01 | turquoise |
| FAR2    | 55711  | male sterility domain containing 1 (MLSTD1), mRNA.                             | -0.14 | 5.76  | 1.25E-16 | 4.54E-16 | turquoise |
| FASN    | 2194   | fatty acid synthase (FASN), mRNA.                                              | 0.02  | 8.47  | 1.39E-01 | 1.69E-01 | turquoise |
| FBXO32  | 114907 | F-box protein 32 (FBXO32), transcript variant 1, mRNA.                         | 0.14  | 5.71  | 5.17E-13 | 1.54E-12 | turquoise |
| FBXO33  | 254170 | F-box protein 33 (FBXO33), mRNA.                                               | -0.34 | 7.15  | 9.78E-42 | 1.06E-40 | turquoise |

|         |        |                                                                                                  |       |      |          |          |           |
|---------|--------|--------------------------------------------------------------------------------------------------|-------|------|----------|----------|-----------|
| FBXW7   | 55294  | F-box and WD repeat domain containing 7 (FBXW7), transcript variant 2, mRNA.                     | 0.63  | 5.85 | 1.29E-62 | 4.08E-61 | turquoise |
| FCER2   | 2208   | Fc fragment of IgE, low affinity II, receptor for (CD23) (FCER2), mRNA.                          | -0.41 | 6.36 | 2.03E-45 | 2.66E-44 | turquoise |
| FCGR2B  | 2213   | Fc fragment of IgG, low affinity IIb, receptor (CD32) (FCGR2B), transcript variant 3, mRNA.      | -0.34 | 7.93 | 4.91E-51 | 7.99E-50 | turquoise |
| FCHSD2  | 9873   | FCH and double SH3 domains 2 (FCHSD2), mRNA.                                                     | 0.00  | 7.63 | 9.94E-01 | 9.95E-01 | turquoise |
| FCRLB   | 127943 | Fc receptor-like B (FCRLB), mRNA.                                                                | -0.02 | 8.49 | 1.11E-01 | 1.38E-01 | turquoise |
| FGR     | 2268   | Gardner-Rasheed feline sarcoma viral (v-fgr) oncogene homolog (FGR), transcript variant 1, mRNA. | 0.02  | 6.98 | 3.18E-01 | 3.62E-01 | turquoise |
| FHL2    | 2274   | four and a half LIM domains 2 (FHL2), transcript variant 4, mRNA.                                | -0.30 | 6.97 | 1.05E-36 | 9.19E-36 | turquoise |
| FILIP1L | 11259  | downregulated in ovarian cancer 1 (DOC1), transcript variant 1, mRNA.                            | 0.06  | 9.65 | 2.02E-06 | 4.03E-06 | turquoise |
| FNBP1   | 23048  | formin binding protein 1 (FNBP1), mRNA.                                                          | -0.01 | 7.60 | 3.70E-01 | 4.16E-01 | turquoise |
| FOXN2   | 3344   | forkhead box N2 (FOXN2), mRNA.                                                                   | -0.08 | 9.46 | 1.39E-05 | 2.62E-05 | turquoise |
| FRAT2   | 23401  | frequently rearranged in advanced T-cell lymphomas 2 (FRAT2), mRNA.                              | -0.02 | 6.72 | 1.87E-01 | 2.24E-01 | turquoise |



|            |        |                                                                                     |       |       |          |          |           |
|------------|--------|-------------------------------------------------------------------------------------|-------|-------|----------|----------|-----------|
| FRMD3      | 257019 | FERM domain containing 3 (FRMD3), mRNA.                                             | 0.17  | 8.16  | 4.68E-15 | 1.55E-14 | turquoise |
| FSTL3      | 10272  | folliculin-like 3 (secreted glycoprotein) (FSTL3), mRNA.                            | -0.07 | 6.40  | 1.88E-06 | 3.76E-06 | turquoise |
| FUCA1      | 2517   | fucosidase, alpha-L- 1, tissue (FUCA1), mRNA.                                       | -0.04 | 8.09  | 1.07E-03 | 1.69E-03 | turquoise |
| FUNDC1     | 139341 | FUN14 domain containing 1 (FUNDC1), mRNA.                                           | -0.13 | 7.82  | 8.51E-07 | 1.74E-06 | turquoise |
| FUT7       | 2529   | fucosyltransferase 7 (alpha (1,3) fucosyltransferase) (FUT7), mRNA.                 | 0.11  | 6.50  | 8.79E-10 | 2.18E-09 | turquoise |
| GABARAP L2 | 11345  | GABA(A) receptor-associated protein-like 2 (GABARAPL2), mRNA.                       | 0.01  | 9.22  | 3.58E-01 | 4.03E-01 | turquoise |
| GADD45B    | 4616   | growth arrest and DNA-damage-inducible, beta (GADD45B), mRNA.                       | 0.09  | 10.35 | 7.34E-09 | 1.72E-08 | turquoise |
| GALK1      | 2584   | galactokinase 1 (GALK1), mRNA.                                                      | -0.01 | 10.41 | 5.42E-01 | 5.86E-01 | turquoise |
| GAS7       | 8522   | growth arrest-specific 7 (GAS7), transcript variant c, mRNA.                        | -0.07 | 5.56  | 2.18E-04 | 3.68E-04 | turquoise |
| GCH1       | 2643   | GTP cyclohydrolase 1 (dopa-responsive dystonia) (GCH1), transcript variant 2, mRNA. | 0.00  | 9.10  | 8.81E-01 | 8.99E-01 | turquoise |
| GCLC       | 2729   | glutamate-cysteine ligase, catalytic subunit (GCLC), mRNA.                          | 0.08  | 8.01  | 1.64E-06 | 3.29E-06 | turquoise |

|        |        |                                                                                                                |       |       |          |          |           |
|--------|--------|----------------------------------------------------------------------------------------------------------------|-------|-------|----------|----------|-----------|
| GCNT2  | 2651   | glucosaminyl (N-acetyl) transferase 2, I-branching enzyme (I blood group) (GCNT2), transcript variant 1, mRNA. | -0.16 | 9.00  | 1.75E-24 | 9.27E-24 | turquoise |
| GFM1   | 85476  | G elongation factor, mitochondrial 1 (GFM1), nuclear gene encoding mitochondrial protein, mRNA.                | 0.36  | 8.28  | 3.32E-57 | 7.59E-56 | turquoise |
| GGA2   | 23062  | golgi associated, gamma adaptin ear containing, ARF binding protein 2 (GGA2), mRNA.                            | -0.09 | 6.20  | 3.68E-09 | 8.81E-09 | turquoise |
| GINS2  | 51659  | GINS complex subunit 2 (Psf2 homolog) (GINS2), mRNA.                                                           | 0.00  | 12.17 | 7.69E-01 | 7.98E-01 | turquoise |
| GINS3  | 64785  | GINS complex subunit 3 (Psf3 homolog) (GINS3), mRNA.                                                           | 0.05  | 6.70  | 1.41E-03 | 2.20E-03 | turquoise |
| GINS4  | 84296  | GINS complex subunit 4 (Sld5 homolog) (GINS4), mRNA.                                                           | 0.01  | 7.59  | 6.76E-01 | 7.11E-01 | turquoise |
| GLIPR2 | 152007 | chromosome 9 open reading frame 19 (C9orf19), mRNA.                                                            | 0.68  | 9.75  | 5.13E-83 | 5.43E-81 | turquoise |
| GLMN   | 11146  | glomulin, FKBP associated protein (GLMN), mRNA.                                                                | 0.07  | 9.57  | 4.06E-05 | 7.32E-05 | turquoise |
| GLO1   | 2739   | glyoxalase I (GLO1), mRNA.                                                                                     | -0.13 | 5.70  | 8.64E-14 | 2.68E-13 | turquoise |
| GLUD1  | 2746   | glutamate dehydrogenase 1 (GLUD1), mRNA.                                                                       | 0.11  | 7.78  | 3.97E-10 | 1.01E-09 | turquoise |
| GNA11  | 2767   | guanine nucleotide binding protein (G protein), alpha 11 (Gq class) (GNA11), mRNA.                             | 0.05  | 8.59  | 4.38E-05 | 7.85E-05 | turquoise |

|         |       |                                                                                                                                              |       |       |          |          |           |
|---------|-------|----------------------------------------------------------------------------------------------------------------------------------------------|-------|-------|----------|----------|-----------|
| GNE     | 10020 | glucosamine (UDP-N-acetyl)-2-epimerase/N-acetylmannosamine kinase (GNE), mRNA.                                                               | 0.40  | 7.52  | 1.82E-42 | 2.07E-41 | turquoise |
| GNG7    | 2788  | guanine nucleotide binding protein (G protein), gamma 7 (GNG7), mRNA.                                                                        | -0.06 | 7.98  | 6.96E-07 | 1.43E-06 | turquoise |
| GNL2    | 29889 | guanine nucleotide binding protein-like 2 (nucleolar) (GNL2), mRNA.                                                                          | 0.05  | 8.92  | 5.16E-03 | 7.58E-03 | turquoise |
| GOLGA7  | 51125 | golgi autoantigen, golgin subfamily a, 7 (GOLGA7), transcript variant 2, mRNA.                                                               | -0.03 | 7.54  | 7.93E-02 | 1.01E-01 | turquoise |
| GOT2    | 2806  | glutamic-oxaloacetic transaminase 2, mitochondrial (aspartate aminotransferase 2) (GOT2), nuclear gene encoding mitochondrial protein, mRNA. | -0.01 | 10.59 | 4.85E-01 | 5.30E-01 | turquoise |
| GPR132  | 29933 | G protein-coupled receptor 132 (GPR132), mRNA.                                                                                               | 0.00  | 8.19  | 8.29E-01 | 8.52E-01 | turquoise |
| GPR137B | 7107  | G protein-coupled receptor 137B (GPR137B), mRNA.                                                                                             | -0.02 | 7.11  | 3.11E-01 | 3.55E-01 | turquoise |
| GPR55   | 9290  | G protein-coupled receptor 55 (GPR55), mRNA.                                                                                                 | 0.10  | 7.98  | 5.76E-08 | 1.28E-07 | turquoise |
| GPT2    | 84706 | glutamic pyruvate transaminase (alanine aminotransferase) 2 (GPT2), mRNA.                                                                    | -0.06 | 7.08  | 6.32E-04 | 1.02E-03 | turquoise |
| GRAMD3  | 65983 | GRAM domain containing 3 (GRAMD3), mRNA.                                                                                                     | -0.06 | 6.38  | 6.45E-06 | 1.24E-05 | turquoise |

|         |       |                                                                                         |       |       |          |          |           |
|---------|-------|-----------------------------------------------------------------------------------------|-------|-------|----------|----------|-----------|
| GRAMD4  | 23151 | death-inducing-protein (DIP), mRNA.                                                     | -0.09 | 9.29  | 6.24E-08 | 1.38E-07 | turquoise |
| GSK3B   | 2932  | glycogen synthase kinase 3 beta (GSK3B), mRNA.                                          | 0.03  | 8.74  | 8.75E-02 | 1.11E-01 | turquoise |
| GTF2E2  | 2961  | general transcription factor IIE, polypeptide 2, beta 34kDa (GTF2E2), mRNA.             | -0.28 | 6.82  | 1.28E-41 | 1.39E-40 | turquoise |
| GTF2F2  | 2963  | general transcription factor IIF, polypeptide 2 (30kD subunit) (GTF2F2), mRNA.          | -0.05 | 7.01  | 1.94E-04 | 3.29E-04 | turquoise |
| GTPBP4  | 23560 | GTP binding protein 4 (GTPBP4), mRNA.                                                   | -0.07 | 6.01  | 9.29E-05 | 1.62E-04 | turquoise |
| GUSB    | 2990  | glucuronidase, beta (GUSB), mRNA.                                                       | -0.28 | 7.00  | 3.35E-35 | 2.71E-34 | turquoise |
| H1FX    | 8971  | H1 histone family, member X (H1FX), mRNA.                                               | -0.03 | 7.20  | 4.33E-02 | 5.70E-02 | turquoise |
| H2AFZ   | 3015  | H2A histone family, member Z (H2AFZ), mRNA.                                             | -0.10 | 8.41  | 6.50E-12 | 1.82E-11 | turquoise |
| HACD3   | 51495 | protein tyrosine phosphatase-like A domain containing 1 (PTPLAD1), mRNA.                | -0.05 | 10.29 | 1.03E-04 | 1.79E-04 | turquoise |
| HAGHL   | 84264 | hydroxyacylglutathione hydrolase-like (HAGHL), transcript variant 2, mRNA.              | -0.02 | 9.80  | 2.75E-01 | 3.17E-01 | turquoise |
| HCFC1R1 | 54985 | host cell factor C1 regulator 1 (XPO1 dependent) (HCFC1R1), transcript variant 1, mRNA. | 0.03  | 9.12  | 2.57E-03 | 3.89E-03 | turquoise |
| HDAC9   | 9734  | histone deacetylase 9 (HDAC9), transcript variant 3, mRNA.                              | 0.02  | 11.10 | 1.01E-01 | 1.26E-01 | turquoise |

|         |       |                                                                                                                    |       |       |          |          |           |
|---------|-------|--------------------------------------------------------------------------------------------------------------------|-------|-------|----------|----------|-----------|
| HERC1   | 8925  | hect (homologous to the E6-AP (UBE3A) carboxyl terminus) domain and RCC1 (CHC1)-like domain (RLD) 1 (HERC1), mRNA. | 0.03  | 8.54  | 1.61E-01 | 1.94E-01 | turquoise |
| HILPDA  | 29923 | hypoxia-inducible protein 2 (HIG2), mRNA.                                                                          | -0.39 | 6.12  | 3.93E-51 | 6.46E-50 | turquoise |
| HIPK2   | 28996 | homeodomain interacting protein kinase 2 (HIPK2), mRNA.                                                            | -0.13 | 8.76  | 1.59E-20 | 6.96E-20 | turquoise |
| HIVEP1  | 3096  | human immunodeficiency virus type I enhancer binding protein 1 (HIVEP1), mRNA.                                     | -0.08 | 10.33 | 1.04E-05 | 1.98E-05 | turquoise |
| HK2     | 3099  | hexokinase 2 (HK2), mRNA.                                                                                          | 0.10  | 7.74  | 6.17E-08 | 1.36E-07 | turquoise |
| HLA-DMB | 3109  | major histocompatibility complex, class II, DM beta (HLA-DMB), mRNA.                                               | 0.05  | 8.47  | 5.69E-03 | 8.32E-03 | turquoise |
| HLA-DOB | 3112  | major histocompatibility complex, class II, DO beta (HLA-DOB), mRNA.                                               | 0.14  | 6.30  | 1.70E-14 | 5.49E-14 | turquoise |
| HMCES   | 56941 | chromosome 3 open reading frame 37 (C3orf37), transcript variant 2, mRNA.                                          | 0.00  | 6.34  | 9.86E-01 | 9.88E-01 | turquoise |
| HMGCS1  | 3157  | 3-hydroxy-3-methylglutaryl-Coenzyme A synthase 1 (soluble) (HMGCS1), mRNA.                                         | -0.01 | 9.67  | 3.77E-01 | 4.22E-01 | turquoise |
| HMOX1   | 3162  | heme oxygenase (decycling) 1 (HMOX1), mRNA.                                                                        | -0.01 | 8.90  | 4.55E-01 | 5.01E-01 | turquoise |

|          |       |                                                                                     |       |       |          |          |           |
|----------|-------|-------------------------------------------------------------------------------------|-------|-------|----------|----------|-----------|
| HPCAL1   | 3241  | hippocalcin-like 1 (HPCAL1), transcript variant 2, mRNA.                            | 0.05  | 6.44  | 9.60E-03 | 1.37E-02 | turquoise |
| HPRT1    | 3251  | hypoxanthine phosphoribosyltransferase 1 (Lesch-Nyhan syndrome) (HPRT1), mRNA.      | 0.06  | 11.24 | 1.64E-05 | 3.06E-05 | turquoise |
| HSD17B12 | 51144 | hydroxysteroid (17-beta) dehydrogenase 12 (HSD17B12), mRNA.                         | -0.10 | 8.25  | 8.46E-14 | 2.63E-13 | turquoise |
| HSD17B4  | 3295  | hydroxysteroid (17-beta) dehydrogenase 4 (HSD17B4), mRNA.                           | -0.17 | 7.32  | 9.39E-31 | 6.23E-30 | turquoise |
| HSPA4L   | 22824 | heat shock 70kDa protein 4-like (HSPA4L), mRNA.                                     | 0.06  | 7.90  | 3.70E-06 | 7.25E-06 | turquoise |
| HSPH1    | 10808 | heat shock 105kDa/110kDa protein 1 (HSPH1), mRNA.                                   | -0.08 | 7.47  | 1.84E-10 | 4.75E-10 | turquoise |
| ICOSLG   | 23308 | inducible T-cell co-stimulator ligand (ICOSLG), mRNA.                               | -0.15 | 9.07  | 1.50E-28 | 9.28E-28 | turquoise |
| ID2      | 3398  | inhibitor of DNA binding 2, dominant negative helix-loop-helix protein (ID2), mRNA. | 0.01  | 6.88  | 2.94E-01 | 3.38E-01 | turquoise |
| ID3      | 3399  | inhibitor of DNA binding 3, dominant negative helix-loop-helix protein (ID3), mRNA. | -0.07 | 8.31  | 3.51E-06 | 6.91E-06 | turquoise |
| IER3     | 8870  | immediate early response 3 (IER3), mRNA.                                            | -0.21 | 8.21  | 4.56E-23 | 2.25E-22 | turquoise |
| IER5     | 51278 | immediate early response 5 (IER5), mRNA.                                            | -0.08 | 7.22  | 2.82E-08 | 6.36E-08 | turquoise |
| IFI16    | 3428  | interferon, gamma-inducible protein 16 (IFI16), mRNA.                               | 0.01  | 8.00  | 5.53E-01 | 5.97E-01 | turquoise |

|        |        |                                                                                                                          |       |       |          |          |           |
|--------|--------|--------------------------------------------------------------------------------------------------------------------------|-------|-------|----------|----------|-----------|
| IFI30  | 10437  | interferon, gamma-inducible protein 30 (IFI30), mRNA.                                                                    | -0.17 | 9.34  | 7.72E-23 | 3.79E-22 | turquoise |
| IFNAR2 | 3455   | interferon (alpha, beta and omega) receptor 2 (IFNAR2), transcript variant 2, mRNA.                                      | -0.04 | 9.86  | 1.01E-02 | 1.44E-02 | turquoise |
| IGFLR1 | 79713  | transmembrane protein 149 (TMEM149), mRNA.                                                                               | 0.02  | 8.39  | 1.63E-01 | 1.97E-01 | turquoise |
| IL12A  | 3592   | interleukin 12A (natural killer cell stimulatory factor 1, cytotoxic lymphocyte maturation factor 1, p35) (IL12A), mRNA. | -0.18 | 7.66  | 1.28E-33 | 9.61E-33 | turquoise |
| IL15   | 3600   | interleukin 15 (IL15), transcript variant 3, mRNA.                                                                       | 0.07  | 9.02  | 8.43E-08 | 1.85E-07 | turquoise |
| IL1A   | 3552   | interleukin 1, alpha (IL1A), mRNA.                                                                                       | -0.37 | 8.57  | 5.17E-55 | 1.03E-53 | turquoise |
| IL1B   | 3553   | interleukin 1, beta (IL1B), mRNA.                                                                                        | -0.04 | 8.65  | 5.03E-02 | 6.55E-02 | turquoise |
| IL21R  | 50615  | interleukin 21 receptor (IL21R), transcript variant 2, mRNA.                                                             | 0.01  | 10.18 | 3.94E-01 | 4.40E-01 | turquoise |
| IL4I1  | 259307 | interleukin 4 induced 1 (IL4I1), transcript variant 1, mRNA.                                                             | 0.38  | 7.12  | 2.94E-51 | 4.85E-50 | turquoise |
| IMPA2  | 3613   | inositol(myo)-1(or 4)-monophosphatase 2 (IMPA2), mRNA.                                                                   | 0.09  | 9.23  | 5.77E-07 | 1.19E-06 | turquoise |
| INF2   | 64423  | chromosome 14 open reading frame 173 (C14orf173), transcript variant 1, mRNA.                                            | -0.06 | 8.53  | 4.44E-07 | 9.25E-07 | turquoise |
| ING2   | 3622   | inhibitor of growth family, member 2 (ING2), mRNA.                                                                       | -0.16 | 8.97  | 1.08E-33 | 8.11E-33 | turquoise |

|         |        |                                                                                         |       |       |          |          |           |
|---------|--------|-----------------------------------------------------------------------------------------|-------|-------|----------|----------|-----------|
| INIP    | 58493  | chromosome 9 open reading frame 80 (C9orf80), mRNA.                                     | -0.18 | 6.32  | 8.77E-20 | 3.71E-19 | turquoise |
| INPP1   | 3628   | inositol polyphosphate-1-phosphatase (INPP1), mRNA.                                     | -0.26 | 6.85  | 8.19E-38 | 7.59E-37 | turquoise |
| INSIG1  | 3638   | insulin induced gene 1 (INSIG1), transcript variant 2, mRNA.                            | -0.15 | 5.73  | 8.65E-21 | 3.83E-20 | turquoise |
| IQCB1   | 9657   | IQ motif containing B1 (IQCB1), transcript variant 3, mRNA.                             | 0.08  | 7.73  | 1.68E-04 | 2.86E-04 | turquoise |
| IQGAP1  | 8826   | IQ motif containing GTPase activating protein 1 (IQGAP1), mRNA.                         | 0.01  | 9.22  | 5.74E-01 | 6.18E-01 | turquoise |
| IQGAP2  | 10788  | IQ motif containing GTPase activating protein 2 (IQGAP2), mRNA.                         | 0.03  | 12.12 | 2.11E-02 | 2.89E-02 | turquoise |
| IQGAP3  | 128239 | IQ motif containing GTPase activating protein 3 (IQGAP3), mRNA.                         | 0.00  | 8.99  | 9.11E-01 | 9.25E-01 | turquoise |
| IRAK3   | 11213  | interleukin-1 receptor-associated kinase 3 (IRAK3), mRNA.                               | 0.31  | 6.22  | 1.07E-46 | 1.49E-45 | turquoise |
| IRF1    | 3659   | interferon regulatory factor 1 (IRF1), mRNA.                                            | -0.08 | 10.74 | 9.44E-12 | 2.62E-11 | turquoise |
| IRF2BP2 | 359948 | interferon regulatory factor 2 binding protein 2 (IRF2BP2), transcript variant 2, mRNA. | 0.24  | 7.66  | 5.22E-34 | 3.98E-33 | turquoise |
| ISG20   | 3669   | interferon stimulated exonuclease gene 20kDa (ISG20), mRNA.                             | -0.37 | 6.47  | 2.10E-51 | 3.49E-50 | turquoise |



|        |        |                                                                                                         |       |       |          |          |           |
|--------|--------|---------------------------------------------------------------------------------------------------------|-------|-------|----------|----------|-----------|
| ITGAE  | 3682   | integrin, alpha E (antigen CD103, human mucosal lymphocyte antigen 1; alpha polypeptide) (ITGAE), mRNA. | -0.18 | 7.60  | 3.17E-22 | 1.50E-21 | turquoise |
| ITGB7  | 3695   | integrin, beta 7 (ITGB7), mRNA.                                                                         | 0.33  | 6.05  | 2.66E-45 | 3.46E-44 | turquoise |
| ITPKA  | 3706   | inositol 1,4,5-trisphosphate 3-kinase A (ITPKA), mRNA.                                                  | 0.03  | 6.67  | 5.86E-02 | 7.57E-02 | turquoise |
| ITPR1  | 3708   | inositol 1,4,5-triphosphate receptor, type 1 (ITPR1), mRNA.                                             | -0.02 | 9.80  | 2.15E-01 | 2.54E-01 | turquoise |
| ITPR2  | 3709   | inositol 1,4,5-triphosphate receptor, type 2 (ITPR2), mRNA.                                             | 0.07  | 10.53 | 1.25E-05 | 2.36E-05 | turquoise |
| JADE3  | 9767   | PHD finger protein 16 (PHF16), transcript variant 2, mRNA.                                              | -0.02 | 5.50  | 2.24E-01 | 2.63E-01 | turquoise |
| JAM3   | 83700  | junctional adhesion molecule 3 (JAM3), mRNA.                                                            | -0.04 | 10.36 | 2.17E-02 | 2.96E-02 | turquoise |
| JARID2 | 3720   | jumonji, AT rich interactive domain 2 (JARID2), mRNA.                                                   | 0.04  | 5.97  | 9.02E-03 | 1.29E-02 | turquoise |
| JDP2   | 122953 | jun dimerization protein 2 (JDP2), mRNA.                                                                | 0.05  | 7.42  | 3.10E-04 | 5.17E-04 | turquoise |
| JKAMP  | 51528  | chromosome 14 open reading frame 100 (C14orf100), mRNA.                                                 | -0.11 | 6.61  | 1.47E-14 | 4.77E-14 | turquoise |
| JMJD1C | 221037 | jumonji domain containing 1C (JMJD1C), transcript variant 2, mRNA.                                      | 0.05  | 9.73  | 9.73E-03 | 1.38E-02 | turquoise |

|           |        |                                                                                                          |       |       |          |          |           |
|-----------|--------|----------------------------------------------------------------------------------------------------------|-------|-------|----------|----------|-----------|
| KANK1     | 23189  | ankyrin repeat domain 15 (ANKRD15), transcript variant 1, mRNA.                                          | -0.03 | 8.44  | 3.92E-02 | 5.19E-02 | turquoise |
| KCNK1     | 3775   | potassium channel, subfamily K, member 1 (KCNK1), mRNA.                                                  | -0.08 | 7.77  | 7.17E-09 | 1.69E-08 | turquoise |
| KCNN4     | 3783   | potassium intermediate/small conductance calcium-activated channel, subfamily N, member 4 (KCNN4), mRNA. | -0.09 | 5.77  | 2.57E-07 | 5.45E-07 | turquoise |
| KCTD12    | 115207 | potassium channel tetramerisation domain containing 12 (KCTD12), mRNA.                                   | -0.10 | 7.07  | 8.64E-05 | 1.51E-04 | turquoise |
| KCTD13    | 253980 | potassium channel tetramerisation domain containing 13 (KCTD13), mRNA.                                   | -0.02 | 10.16 | 1.71E-01 | 2.06E-01 | turquoise |
| KDM5B     | 10765  | jumonji, AT rich interactive domain 1B (JARID1B), mRNA.                                                  | 0.04  | 10.12 | 1.80E-03 | 2.78E-03 | turquoise |
| KIAA0020  | 9933   | KIAA0020 (KIAA0020), mRNA.                                                                               | -0.27 | 8.65  | 5.14E-41 | 5.39E-40 | turquoise |
| KIAA0513  | 9764   | KIAA0513 (KIAA0513), mRNA.                                                                               | 0.15  | 7.50  | 2.86E-17 | 1.07E-16 | turquoise |
| KIAA1324L | 222223 | KIAA1324-like (KIAA1324L), mRNA.                                                                         | 0.51  | 9.89  | 4.57E-84 | 5.65E-82 | turquoise |
| KIF13B    | 23303  | kinesin family member 13B (KIF13B), mRNA.                                                                | 0.20  | 7.74  | 4.66E-21 | 2.08E-20 | turquoise |
| KLF13     | 51621  | Kruppel-like factor 13 (KLF13), mRNA.                                                                    | -0.19 | 10.73 | 9.78E-25 | 5.26E-24 | turquoise |
| KLF2      | 10365  | Kruppel-like factor 2 (lung) (KLF2), mRNA.                                                               | -0.08 | 7.33  | 1.21E-05 | 2.29E-05 | turquoise |

|        |       |                                                                                       |       |      |          |          |           |
|--------|-------|---------------------------------------------------------------------------------------|-------|------|----------|----------|-----------|
| KLF6   | 1316  | Kruppel-like factor 6 (KLF6), transcript variant 2, mRNA.                             | 0.16  | 8.02 | 1.49E-13 | 4.56E-13 | turquoise |
| KLF9   | 687   | Kruppel-like factor 9 (KLF9), mRNA.                                                   | -0.02 | 8.09 | 7.77E-02 | 9.87E-02 | turquoise |
| KLHDC2 | 23588 | kelch domain containing 2 (KLHDC2), mRNA.                                             | -0.09 | 6.98 | 6.62E-05 | 1.17E-04 | turquoise |
| KLHL9  | 55958 | kelch-like 9 (Drosophila) (KLHL9), mRNA.                                              | -0.31 | 7.82 | 2.95E-42 | 3.34E-41 | turquoise |
| LACTB2 | 51110 | lactamase, beta 2 (LACTB2), mRNA.                                                     | 0.52  | 6.23 | 1.03E-49 | 1.59E-48 | turquoise |
| LAMP3  | 27074 | lysosomal-associated membrane protein 3 (LAMP3), mRNA.                                | -0.09 | 8.40 | 1.17E-08 | 2.73E-08 | turquoise |
| LAPTM5 | 7805  | lysosomal associated multispinning membrane protein 5 (LAPTM5), mRNA.                 | 0.02  | 8.97 | 3.12E-02 | 4.16E-02 | turquoise |
| LARP1B | 55132 | La ribonucleoprotein domain family, member 2 (LARP2), transcript variant 3, mRNA.     | -0.07 | 6.58 | 4.97E-06 | 9.67E-06 | turquoise |
| LASP1  | 3927  | LIM and SH3 protein 1 (LASP1), mRNA.                                                  | 0.27  | 8.80 | 3.72E-40 | 3.78E-39 | turquoise |
| LAT2   | 7462  | linker for activation of T cells family, member 2 (LAT2), transcript variant 3, mRNA. | -0.18 | 5.49 | 5.91E-19 | 2.41E-18 | turquoise |
| LCK    | 3932  | lymphocyte-specific protein tyrosine kinase (LCK), mRNA.                              | -0.17 | 8.73 | 1.24E-14 | 4.02E-14 | turquoise |
| LDLR   | 3949  | low density lipoprotein receptor (familial hypercholesterolemia) (LDLR), mRNA.        | 1.01  | 7.11 | 1.96E-92 | 4.98E-90 | turquoise |
| LGMN   | 5641  | legumain (LGMN), transcript variant 1, mRNA.                                          | 0.12  | 7.20 | 1.96E-15 | 6.62E-15 | turquoise |

|         |       |                                                                           |       |       |          |          |           |
|---------|-------|---------------------------------------------------------------------------|-------|-------|----------|----------|-----------|
| LGR4    | 55366 | leucine-rich repeat-containing G protein-coupled receptor 4 (LGR4), mRNA. | 0.16  | 8.37  | 7.39E-21 | 3.28E-20 | turquoise |
| LIMK1   | 3984  | LIM domain kinase 1 (LIMK1), mRNA.                                        | -0.03 | 8.20  | 6.09E-02 | 7.86E-02 | turquoise |
| LMBR1   | 64327 | limb region 1 homolog (mouse) (LMBR1), mRNA.                              | -0.03 | 6.79  | 9.45E-03 | 1.35E-02 | turquoise |
| LMO2    | 4005  | LIM domain only 2 (rhombotin-like 1) (LMO2), mRNA.                        | -0.01 | 8.54  | 4.43E-01 | 4.90E-01 | turquoise |
| LMO4    | 8543  | LIM domain only 4 (LMO4), mRNA.                                           | -0.10 | 7.75  | 3.08E-13 | 9.30E-13 | turquoise |
| LONRF1  | 91694 | LON peptidase N-terminal domain and ring finger 1 (LONRF1), mRNA.         | -0.14 | 5.74  | 2.03E-12 | 5.85E-12 | turquoise |
| LPCAT1  | 79888 | acyltransferase like 2 (AYTL2), mRNA.                                     | -0.11 | 9.01  | 8.53E-14 | 2.65E-13 | turquoise |
| LPGAT1  | 9926  | lysophosphatidylglycerol acyltransferase 1 (LPGAT1), mRNA.                | -0.12 | 9.43  | 4.30E-20 | 1.85E-19 | turquoise |
| LPIN1   | 23175 | lipin 1 (LPIN1), mRNA.                                                    | -0.21 | 9.41  | 3.68E-33 | 2.72E-32 | turquoise |
| LPIN2   | 9663  | lipin 2 (LPIN2), mRNA.                                                    | -0.19 | 8.43  | 4.91E-35 | 3.94E-34 | turquoise |
| LPXN    | 9404  | leupaxin (LPXN), mRNA.                                                    | 0.05  | 6.24  | 9.50E-05 | 1.66E-04 | turquoise |
| LRIG1   | 26018 | leucine-rich repeats and immunoglobulin-like domains 1 (LRIG1), mRNA.     | -0.08 | 6.67  | 5.00E-12 | 1.41E-11 | turquoise |
| LRMP    | 4033  | lymphoid-restricted membrane protein (LRMP), mRNA.                        | -0.01 | 10.91 | 5.89E-01 | 6.31E-01 | turquoise |
| LRRC1   | 55227 | leucine rich repeat containing 1 (LRRC1), mRNA.                           | 0.05  | 7.03  | 1.73E-03 | 2.67E-03 | turquoise |
| LRRC16A | 55604 | leucine rich repeat containing 16 (LRRC16), mRNA.                         | -0.07 | 8.77  | 2.80E-04 | 4.69E-04 | turquoise |
| LRRK1   | 79705 | leucine-rich repeat kinase 1 (LRRK1), mRNA.                               | -0.10 | 9.34  | 4.43E-16 | 1.56E-15 | turquoise |

|        |        |                                                                                 |       |      |          |          |           |
|--------|--------|---------------------------------------------------------------------------------|-------|------|----------|----------|-----------|
| LTA    | 4049   | lymphotoxin alpha (TNF superfamily, member 1) (LTA), mRNA.                      | 0.29  | 6.09 | 1.36E-38 | 1.30E-37 | turquoise |
| LTB    | 4050   | lymphotoxin beta (TNF superfamily, member 3) (LTB), transcript variant 2, mRNA. | -0.07 | 6.89 | 1.76E-05 | 3.29E-05 | turquoise |
| LY86   | 9450   | lymphocyte antigen 86 (LY86), mRNA.                                             | -0.01 | 6.51 | 6.90E-01 | 7.25E-01 | turquoise |
| LYAR   | 55646  | hypothetical protein FLJ20425 (LYAR), mRNA.                                     | 0.04  | 7.58 | 9.27E-03 | 1.32E-02 | turquoise |
| LYL1   | 4066   | lymphoblastic leukemia derived sequence 1 (LYL1), mRNA.                         | -0.09 | 8.98 | 3.10E-06 | 6.11E-06 | turquoise |
| LYN    | 4067   | v-yes-1 Yamaguchi sarcoma viral related oncogene homolog (LYN), mRNA.           | 0.02  | 8.89 | 1.01E-01 | 1.26E-01 | turquoise |
| LYPD6B | 130576 | hypothetical protein LOC130576 (LOC130576), mRNA.                               | -0.14 | 7.62 | 2.37E-17 | 8.90E-17 | turquoise |
| LYRM5  | 144363 | LYR motif containing 5 (LYRM5), mRNA.                                           | 0.05  | 8.53 | 1.33E-04 | 2.29E-04 | turquoise |
| LYSMD2 | 256586 | LysM, putative peptidoglycan-binding, domain containing 2 (LYSMD2), mRNA.       | -0.07 | 8.69 | 1.15E-07 | 2.49E-07 | turquoise |
| MAEA   | 730744 | PREDICTED: similar to macrophage erythroblast attacher (LOC730744), mRNA.       | 0.04  | 9.07 | 3.46E-04 | 5.75E-04 | turquoise |
| MANBA  | 4126   | mannosidase, beta A, lysosomal (MANBA), mRNA.                                   | -0.01 | 7.82 | 4.63E-01 | 5.09E-01 | turquoise |

|          |        |                                                                                        |       |      |          |          |           |
|----------|--------|----------------------------------------------------------------------------------------|-------|------|----------|----------|-----------|
| MAP2K1   | 5604   | mitogen-activated protein kinase kinase 1 (MAP2K1), mRNA.                              | 0.14  | 7.65 | 8.28E-17 | 3.03E-16 | turquoise |
| MAP3K6   | 9064   | mitogen-activated protein kinase kinase kinase 6 (MAP3K6), mRNA.                       | -0.13 | 7.74 | 1.15E-16 | 4.17E-16 | turquoise |
| MAP3K7   | 6885   | mitogen-activated protein kinase kinase kinase 7 (MAP3K7), transcript variant B, mRNA. | 0.00  | 9.91 | 7.83E-01 | 8.11E-01 | turquoise |
| MAP3K8   | 1326   | mitogen-activated protein kinase kinase kinase 8 (MAP3K8), mRNA.                       | 0.08  | 7.83 | 6.50E-05 | 1.15E-04 | turquoise |
| MAP4K1   | 11184  | mitogen-activated protein kinase kinase kinase 1 (MAP4K1), transcript variant 2, mRNA. | 0.58  | 5.65 | 3.91E-40 | 3.97E-39 | turquoise |
| MAPK1    | 5594   | mitogen-activated protein kinase 1 (MAPK1), transcript variant 2, mRNA.                | 0.35  | 6.22 | 2.79E-41 | 2.96E-40 | turquoise |
| MAPK6    | 5597   | mitogen-activated protein kinase 6 (MAPK6), mRNA.                                      | -0.04 | 8.49 | 2.29E-03 | 3.48E-03 | turquoise |
| MARCKS   | 4082   | myristoylated alanine-rich protein kinase C substrate (MARCKS), mRNA.                  | 0.01  | 7.40 | 6.61E-01 | 6.98E-01 | turquoise |
| MARCKSL1 | 65108  | MARCKS-like 1 (MARCKSL1), mRNA.                                                        | 0.08  | 6.33 | 5.56E-10 | 1.39E-09 | turquoise |
| MB21D1   | 115004 | chromosome 6 open reading frame 150 (C6orf150), mRNA.                                  | -0.10 | 7.26 | 2.90E-12 | 8.27E-12 | turquoise |

|         |       |                                                                                                          |       |       |          |          |           |
|---------|-------|----------------------------------------------------------------------------------------------------------|-------|-------|----------|----------|-----------|
| MCM3    | 4172  | MCM3 minichromosome maintenance deficient 3 ( <i>S. cerevisiae</i> ) (MCM3), mRNA.                       | 0.01  | 12.05 | 6.56E-01 | 6.94E-01 | turquoise |
| MCM4    | 4173  | MCM4 minichromosome maintenance deficient 4 ( <i>S. cerevisiae</i> ) (MCM4), transcript variant 1, mRNA. | -0.05 | 6.50  | 2.78E-02 | 3.74E-02 | turquoise |
| MCTP1   | 79772 | multiple C2 domains, transmembrane 1 (MCTP1), transcript variant S, mRNA.                                | -0.63 | 6.50  | 4.88E-69 | 2.12E-67 | turquoise |
| MDH1    | 4190  | malate dehydrogenase 1, NAD (soluble) (MDH1), mRNA.                                                      | 0.44  | 9.80  | 9.73E-59 | 2.48E-57 | turquoise |
| ME1     | 4199  | malic enzyme 1, NADP(+)-dependent, cytosolic (ME1), mRNA.                                                | 0.07  | 10.42 | 1.22E-05 | 2.31E-05 | turquoise |
| MED30   | 90390 | thyroid hormone receptor associated protein 6 (THRAP6), mRNA.                                            | -0.21 | 6.69  | 6.79E-33 | 4.99E-32 | turquoise |
| MERTK   | 10461 | c-mer proto-oncogene tyrosine kinase (MERTK), mRNA.                                                      | -0.03 | 9.41  | 2.50E-02 | 3.39E-02 | turquoise |
| METTL7A | 25840 | methyltransferase like 7A (METTL7A), mRNA.                                                               | -0.52 | 7.72  | 4.78E-61 | 1.39E-59 | turquoise |
| MFSD6   | 54842 | FLJ20160 protein (FLJ20160), mRNA.                                                                       | -0.10 | 7.07  | 2.65E-11 | 7.17E-11 | turquoise |
| MIB1    | 57534 | mindbomb homolog 1 ( <i>Drosophila</i> ) (MIB1), mRNA.                                                   | 0.02  | 8.05  | 1.99E-01 | 2.37E-01 | turquoise |

|           |       |                                                                                                  |       |      |          |          |           |
|-----------|-------|--------------------------------------------------------------------------------------------------|-------|------|----------|----------|-----------|
| MIR600HG  | 81571 | PREDICTED: chromosome 9 open reading frame 45 (C9orf45), misc RNA.                               | 0.10  | 6.72 | 1.29E-08 | 2.98E-08 | turquoise |
| MKLN1     | 4289  | muskelin 1, intracellular mediator containing kelch motifs (MKLN1), mRNA.                        | 0.06  | 7.41 | 9.39E-05 | 1.64E-04 | turquoise |
| MLEC      | 9761  | KIAA0152 (KIAA0152), mRNA.                                                                       | 0.45  | 5.88 | 1.09E-57 | 2.57E-56 | turquoise |
| MMD       | 23531 | monocyte to macrophage differentiation-associated (MMD), mRNA.                                   | -0.07 | 9.52 | 6.07E-06 | 1.17E-05 | turquoise |
| MOB3B     | 79817 | MOB1, Mps One Binder kinase activator-like 2B (yeast) (MOBKL2B), mRNA.                           | -0.09 | 7.92 | 2.80E-09 | 6.73E-09 | turquoise |
| MOXD1     | 26002 | monooxygenase, DBH-like 1 (MOXD1), transcript variant 2, mRNA.                                   | 0.22  | 5.88 | 1.79E-20 | 7.81E-20 | turquoise |
| MPHOSPH10 | 10199 | M-phase phosphoprotein 10 (U3 small nucleolar ribonucleoprotein) (MPHOSPH10), mRNA.              | -0.64 | 7.83 | 3.61E-86 | 5.23E-84 | turquoise |
| MPP6      | 51678 | membrane protein, palmitoylated 6 (MAGUK p55 subfamily member 6) (MPP6), mRNA.                   | -0.19 | 7.74 | 1.18E-24 | 6.32E-24 | turquoise |
| MRPS30    | 10884 | mitochondrial ribosomal protein S30 (MRPS30), nuclear gene encoding mitochondrial protein, mRNA. | -0.07 | 8.75 | 3.50E-07 | 7.36E-07 | turquoise |



|        |        |                                                                                                |       |       |          |          |           |
|--------|--------|------------------------------------------------------------------------------------------------|-------|-------|----------|----------|-----------|
| MRPS6  | 64968  | mitochondrial ribosomal protein S6 (MRPS6), nuclear gene encoding mitochondrial protein, mRNA. | -0.08 | 7.98  | 6.80E-08 | 1.50E-07 | turquoise |
| MSH6   | 2956   | mutS homolog 6 (E. coli) (MSH6), mRNA.                                                         | 0.06  | 7.16  | 1.12E-06 | 2.28E-06 | turquoise |
| MSL3   | 10943  | male-specific lethal 3-like 1 (Drosophila) (MSL3L1), transcript variant 2, mRNA.               | -0.10 | 8.75  | 2.61E-10 | 6.70E-10 | turquoise |
| MT1A   | 4489   | metallothionein 1A (MT1A), mRNA.                                                               | 0.14  | 7.18  | 2.08E-18 | 8.21E-18 | turquoise |
| MT1F   | 4494   | metallothionein 1F (MT1F), mRNA.                                                               | 0.10  | 8.57  | 6.93E-09 | 1.63E-08 | turquoise |
| MT1X   | 4501   | metallothionein 1X (MT1X), mRNA.                                                               | -0.03 | 8.58  | 4.81E-02 | 6.28E-02 | turquoise |
| MT2A   | 4502   | metallothionein 2A (MT2A), mRNA.                                                               | -0.12 | 7.70  | 1.68E-18 | 6.68E-18 | turquoise |
| MTX2   | 10651  | metaxin 2 (MTX2), transcript variant 1, mRNA.                                                  | 0.02  | 9.26  | 2.97E-01 | 3.41E-01 | turquoise |
| MTX3   | 345778 | metaxin 3 (MTX3), mRNA.                                                                        | 0.19  | 8.41  | 1.24E-25 | 6.89E-25 | turquoise |
| MYC    | 4609   | v-myc myelocytomatosis viral oncogene homolog (avian) (MYC), mRNA.                             | 0.04  | 8.55  | 1.33E-03 | 2.08E-03 | turquoise |
| MYH11  | 4629   | myosin, heavy chain 11, smooth muscle (MYH11), transcript variant SM2B, mRNA.                  | 0.31  | 10.85 | 6.76E-51 | 1.09E-49 | turquoise |
| MYL12A | 10627  | myosin regulatory light chain MRCL3 (MRCL3), mRNA.                                             | 0.22  | 6.46  | 2.86E-28 | 1.76E-27 | turquoise |
| MYO1D  | 4642   | myosin ID (MYO1D), mRNA.                                                                       | 0.01  | 8.19  | 6.29E-01 | 6.68E-01 | turquoise |
| MYO1E  | 4643   | myosin IE (MYO1E), mRNA.                                                                       | 0.03  | 8.73  | 3.78E-02 | 5.01E-02 | turquoise |
| MYO5C  | 55930  | myosin VC (MYO5C), mRNA.                                                                       | 0.00  | 8.62  | 7.33E-01 | 7.64E-01 | turquoise |

|         |        |                                                                                                     |       |       |          |          |           |
|---------|--------|-----------------------------------------------------------------------------------------------------|-------|-------|----------|----------|-----------|
| N4BP2   | 55728  | Nedd4 binding protein 2 (N4BP2), mRNA.                                                              | -0.02 | 7.06  | 1.14E-01 | 1.42E-01 | turquoise |
| N4BP2L2 | 88523  | CG016 (LOC88523), mRNA.                                                                             | 0.05  | 9.25  | 2.08E-05 | 3.85E-05 | turquoise |
| N6AMT1  | 642897 | PREDICTED: similar to N6-DNA methyltransferase A (LOC642897), mRNA.                                 | -0.17 | 6.33  | 3.16E-14 | 1.00E-13 | turquoise |
| NA      | 5026   | purinergic receptor P2X, ligand-gated ion channel, 5 (P2RX5), transcript variant 3, mRNA.           | 0.17  | 9.72  | 6.63E-27 | 3.87E-26 | turquoise |
| NA      | 5460   | POU domain, class 5, transcription factor 1 (POU5F1), transcript variant 1, mRNA.                   | -0.20 | 9.39  | 1.10E-25 | 6.13E-25 | turquoise |
| NA      | 201562 | protein tyrosine phosphatase-like (proline instead of catalytic arginine), member b (PTPLB), mRNA.  | -0.17 | 7.12  | 1.30E-18 | 5.18E-18 | turquoise |
| NA      | 115352 | Fc receptor-like 3 (FCRL3), transcript variant 2, mRNA.                                             | 0.14  | 7.79  | 5.19E-18 | 2.02E-17 | turquoise |
| NA      | 6351   | chemokine (C-C motif) ligand 4 (CCL4), transcript variant 1, mRNA.                                  | 0.08  | 11.63 | 1.68E-09 | 4.09E-09 | turquoise |
| NA      | 4207   | MADS box transcription enhancer factor 2, polypeptide B (myocyte enhancer factor 2B) (MEF2B), mRNA. | -0.07 | 6.31  | 8.50E-05 | 1.49E-04 | turquoise |
| NA      | 730422 | PREDICTED: similar to chemokine (C-C motif) ligand 3-like 3 (LOC730422), mRNA.                      | -0.04 | 8.11  | 3.19E-04 | 5.32E-04 | turquoise |

|       |       |                                                                                             |       |       |          |          |           |
|-------|-------|---------------------------------------------------------------------------------------------|-------|-------|----------|----------|-----------|
| NA    | 5032  | purinergic receptor P2Y, G-protein coupled, 11 (P2RY11), mRNA.                              | 0.05  | 11.45 | 9.35E-04 | 1.48E-03 | turquoise |
| NA    | 90925 | PREDICTED: hypothetical protein LOC90925 (LOC90925), misc RNA.                              | -0.02 | 7.57  | 2.83E-01 | 3.25E-01 | turquoise |
| NA    | 2744  | glutaminase (GLS), mRNA.                                                                    | 0.01  | 7.21  | 4.18E-01 | 4.64E-01 | turquoise |
| NA    | 30851 | Tax1 (human T-cell leukemia virus type I) binding protein 3 (TAX1BP3), mRNA.                | -0.01 | 6.89  | 5.50E-01 | 5.94E-01 | turquoise |
| NA    | 56342 | peter pan homolog (Drosophila) (PPAN), mRNA.                                                | 0.01  | 6.10  | 5.60E-01 | 6.03E-01 | turquoise |
| NA    | 3336  | heat shock 10kDa protein 1 (chaperonin 10) (HSPE1), mRNA.                                   | 0.01  | 10.72 | 5.73E-01 | 6.17E-01 | turquoise |
| NA    | 3310  | heat shock 70kDa protein 6 (HSP70B') (HSPA6), mRNA.                                         | 0.01  | 5.97  | 6.32E-01 | 6.71E-01 | turquoise |
| NAAA  | 27163 | N-acylsphingosine amidohydrolase (acid ceramidase)-like (ASAH), transcript variant 2, mRNA. | -0.18 | 8.82  | 1.54E-36 | 1.33E-35 | turquoise |
| NAB1  | 4664  | NGFI-A binding protein 1 (EGR1 binding protein 1) (NAB1), mRNA.                             | -0.03 | 6.89  | 4.61E-02 | 6.04E-02 | turquoise |
| NABP1 | 64859 | oligonucleotide/oligosaccharide-binding fold containing 2A (OBFC2A), mRNA.                  | -0.02 | 8.53  | 1.58E-01 | 1.91E-01 | turquoise |
| NAE1  | 8883  | amyloid beta precursor protein binding protein 1 (APPBP1), transcript variant 1, mRNA.      | 0.14  | 6.21  | 2.84E-19 | 1.17E-18 | turquoise |

|         |        |                                                                          |       |       |          |          |           |
|---------|--------|--------------------------------------------------------------------------|-------|-------|----------|----------|-----------|
| NAMPT   | 10135  | pre-B-cell colony enhancing factor 1 (PBEF1), mRNA.                      | 0.69  | 8.09  | 1.10E-74 | 6.35E-73 | turquoise |
| NARFL   | 64428  | nuclear prelamin A recognition factor-like (NARFL), mRNA.                | 0.00  | 7.50  | 9.17E-01 | 9.30E-01 | turquoise |
| NCALD   | 83988  | neurocalcin delta (NCALD), transcript variant 1, mRNA.                   | -0.04 | 9.30  | 3.65E-04 | 6.05E-04 | turquoise |
| NCF4    | 4689   | neutrophil cytosolic factor 4, 40kDa (NCF4), transcript variant 2, mRNA. | 0.03  | 6.39  | 1.40E-01 | 1.71E-01 | turquoise |
| NCK2    | 729030 | PREDICTED: similar to NCK adaptor protein 2 (LOC729030), mRNA.           | 0.08  | 5.79  | 1.34E-07 | 2.89E-07 | turquoise |
| NCOA3   | 8202   | nuclear receptor coactivator 3 (NCOA3), transcript variant 2, mRNA.      | -0.08 | 8.20  | 1.38E-11 | 3.79E-11 | turquoise |
| NCOA7   | 135112 | nuclear receptor coactivator 7 (NCOA7), mRNA.                            | -0.15 | 10.06 | 2.22E-20 | 9.64E-20 | turquoise |
| NCR3    | 259197 | natural cytotoxicity triggering receptor 3 (NCR3), mRNA.                 | 0.08  | 8.36  | 7.37E-04 | 1.18E-03 | turquoise |
| NDUFAF4 | 29078  | chromosome 6 open reading frame 66 (C6orf66), mRNA.                      | -0.31 | 8.34  | 1.20E-52 | 2.08E-51 | turquoise |
| NEK6    | 10783  | NIMA (never in mitosis gene a)-related kinase 6 (NEK6), mRNA.            | -0.47 | 8.62  | 2.10E-48 | 3.16E-47 | turquoise |
| NEXN    | 91624  | nexilin (F actin binding protein) (NEXN), mRNA.                          | -0.03 | 7.12  | 1.25E-01 | 1.54E-01 | turquoise |

|        |        |                                                                                                                          |       |      |          |          |           |
|--------|--------|--------------------------------------------------------------------------------------------------------------------------|-------|------|----------|----------|-----------|
| NFATC1 | 4772   | nuclear factor of activated T-cells, cytoplasmic, calcineurin-dependent 1 (NFATC1), transcript variant 1, mRNA.          | 0.14  | 8.60 | 3.82E-12 | 1.08E-11 | turquoise |
| NFE2L3 | 9603   | nuclear factor (erythroid-derived 2)-like 3 (NFE2L3), mRNA.                                                              | -0.08 | 9.61 | 1.45E-07 | 3.12E-07 | turquoise |
| NFIL3  | 4783   | nuclear factor, interleukin 3 regulated (NFIL3), mRNA.                                                                   | 0.11  | 6.88 | 4.35E-12 | 1.23E-11 | turquoise |
| NFKB2  | 4791   | nuclear factor of kappa light polypeptide gene enhancer in B-cells 2 (p49/p100) (NFKB2), transcript variant 3, mRNA.     | 0.02  | 5.91 | 4.30E-01 | 4.76E-01 | turquoise |
| NFKBIZ | 64332  | nuclear factor of kappa light polypeptide gene enhancer in B-cells inhibitor, zeta (NFKBIZ), transcript variant 2, mRNA. | -0.09 | 8.41 | 1.04E-08 | 2.42E-08 | turquoise |
| NGLY1  | 55768  | N-glycanase 1 (NGLY1), mRNA.                                                                                             | 0.07  | 7.01 | 9.56E-07 | 1.95E-06 | turquoise |
| NHLRC3 | 387921 | similar to RIKEN cDNA 8030451K01 (LOC387921), transcript variant 1, mRNA.                                                | 0.01  | 7.31 | 6.72E-01 | 7.08E-01 | turquoise |
| NINJ1  | 4814   | ninjurin 1 (NINJ1), mRNA.                                                                                                | 0.00  | 5.60 | 9.56E-01 | 9.63E-01 | turquoise |
| NIP7   | 51388  | nuclear import 7 homolog (S. cerevisiae) (NIP7), mRNA.                                                                   | 0.08  | 8.36 | 6.33E-13 | 1.88E-12 | turquoise |

|       |        |                                                                                        |       |      |          |          |           |
|-------|--------|----------------------------------------------------------------------------------------|-------|------|----------|----------|-----------|
| NIPA1 | 123606 | non imprinted in Prader-Willi/Angelman syndrome 1 (NIPA1), mRNA.                       | -0.14 | 6.97 | 1.67E-19 | 6.96E-19 | turquoise |
| NIPA2 | 81614  | non imprinted in Prader-Willi/Angelman syndrome 2 (NIPA2), transcript variant 1, mRNA. | -0.12 | 5.76 | 1.51E-08 | 3.46E-08 | turquoise |
| NLRP7 | 199713 | NLR family, pyrin domain containing 7 (NLRP7), transcript variant 1, mRNA.             | 1.69  | 6.97 | 5.13E-85 | 6.51E-83 | turquoise |
| NOC3L | 64318  | nucleolar complex associated 3 homolog (S. cerevisiae) (NOC3L), mRNA.                  | -0.03 | 8.14 | 2.80E-02 | 3.76E-02 | turquoise |
| NOD2  | 64127  | nucleotide-binding oligomerization domain containing 2 (NOD2), mRNA.                   | -0.05 | 5.84 | 6.88E-03 | 9.98E-03 | turquoise |
| NPC1  | 4864   | Niemann-Pick disease, type C1 (NPC1), mRNA.                                            | -0.09 | 6.38 | 2.98E-10 | 7.60E-10 | turquoise |
| NSUN2 | 54888  | NOL1/NOP2/Sun domain family, member 2 (NSUN2), mRNA.                                   | -0.21 | 7.03 | 1.38E-24 | 7.35E-24 | turquoise |
| NT5C2 | 22978  | 5'-nucleotidase, cytosolic II (NT5C2), mRNA.                                           | 0.21  | 7.73 | 1.78E-23 | 8.94E-23 | turquoise |
| NTAN1 | 123803 | N-terminal asparagine amidase (NTAN1), mRNA.                                           | 0.00  | 7.17 | 9.84E-01 | 9.87E-01 | turquoise |
| NUB1  | 401433 | PREDICTED: hypothetical gene supported by AK127717 (LOC401433), misc RNA.              | 0.05  | 7.76 | 1.29E-02 | 1.82E-02 | turquoise |
| NUP88 | 4927   | nucleoporin 88kDa (NUP88), mRNA.                                                       | 0.07  | 8.34 | 8.00E-06 | 1.53E-05 | turquoise |

|          |        |                                                                                                                                     |       |       |          |          |           |
|----------|--------|-------------------------------------------------------------------------------------------------------------------------------------|-------|-------|----------|----------|-----------|
| OGFRL1   | 79627  | opioid growth factor receptor-like 1 (OGFRL1), mRNA.                                                                                | -0.11 | 6.37  | 1.17E-09 | 2.88E-09 | turquoise |
| OPTN     | 10133  | optineurin (OPTN), transcript variant 1, mRNA.                                                                                      | 0.08  | 9.22  | 4.19E-09 | 1.00E-08 | turquoise |
| ORC1     | 4998   | origin recognition complex, subunit 1-like (yeast) (ORC1L), mRNA.                                                                   | -0.03 | 9.74  | 5.99E-03 | 8.73E-03 | turquoise |
| P2RY10   | 27334  | purinergic receptor P2Y, G-protein coupled, 10 (P2RY10), transcript variant 1, mRNA.                                                | 0.03  | 6.84  | 1.38E-01 | 1.69E-01 | turquoise |
| P2RY8    | 286530 | purinergic receptor P2Y, G-protein coupled, 8 (P2RY8), mRNA.                                                                        | 0.03  | 8.49  | 1.67E-02 | 2.32E-02 | turquoise |
| P4HA1    | 5033   | procollagen-proline, 2-oxoglutarate 4-dioxygenase (proline 4-hydroxylase), alpha polypeptide I (P4HA1), transcript variant 1, mRNA. | -0.13 | 10.03 | 3.63E-17 | 1.35E-16 | turquoise |
| PAFAH1B1 | 5048   | platelet-activating factor acetylhydrolase, isoform Ib, alpha subunit 45kDa (PAFAH1B1), mRNA.                                       | 0.09  | 9.80  | 3.56E-08 | 7.98E-08 | turquoise |
| PAIP2    | 51247  | poly(A) binding protein interacting protein 2 (PAIP2), transcript variant 2, mRNA.                                                  | 0.02  | 6.82  | 1.38E-01 | 1.68E-01 | turquoise |
| PAK1IP1  | 55003  | PAK1 interacting protein 1 (PAK1IP1), mRNA.                                                                                         | 0.11  | 9.05  | 2.44E-07 | 5.19E-07 | turquoise |

|        |        |                                                                                                    |       |       |          |          |           |
|--------|--------|----------------------------------------------------------------------------------------------------|-------|-------|----------|----------|-----------|
| PAQR4  | 124222 | progesterone and adiponectin receptor family member IV (PAQR4), mRNA.                              | 0.40  | 7.11  | 4.51E-49 | 6.87E-48 | turquoise |
| PAQR8  | 85315  | progesterone and adiponectin receptor family member VIII (PAQR8), mRNA.                            | 0.13  | 6.61  | 1.20E-16 | 4.35E-16 | turquoise |
| PARD6A | 50855  | par-6 partitioning defective 6 homolog alpha (C. elegans) (PARD6A), transcript variant 2, mRNA.    | 0.59  | 8.40  | 1.01E-73 | 5.47E-72 | turquoise |
| PARM1  | 25849  | DKFZP564O0823 protein (DKFZP564O0823), mRNA.                                                       | -0.89 | 9.18  | 2.32E-59 | 6.26E-58 | turquoise |
| PARP15 | 165631 | poly (ADP-ribose) polymerase family, member 15 (PARP15), mRNA.                                     | -0.02 | 8.07  | 6.16E-02 | 7.94E-02 | turquoise |
| PARP4  | 143    | poly (ADP-ribose) polymerase family, member 4 (PARP4), mRNA.                                       | 0.03  | 7.11  | 5.80E-02 | 7.49E-02 | turquoise |
| PCMT1  | 5110   | protein-L-isoaspartate (D-aspartate) O-methyltransferase (PCMT1), mRNA.                            | 0.19  | 7.60  | 7.24E-33 | 5.31E-32 | turquoise |
| PCSK7  | 9159   | proprotein convertase subtilisin/kexin type 7 (PCSK7), mRNA.                                       | 0.11  | 10.31 | 6.63E-15 | 2.18E-14 | turquoise |
| PDCD2L | 84306  | programmed cell death 2-like (PDCD2L), mRNA.                                                       | 0.10  | 9.10  | 2.09E-12 | 6.01E-12 | turquoise |
| PDCD4  | 27250  | programmed cell death 4 (neoplastic transformation inhibitor) (PDCD4), transcript variant 1, mRNA. | -0.04 | 10.10 | 1.56E-02 | 2.17E-02 | turquoise |



|         |        |                                                                            |       |       |          |          |           |
|---------|--------|----------------------------------------------------------------------------|-------|-------|----------|----------|-----------|
| PDE7A   | 5150   | phosphodiesterase 7A (PDE7A), transcript variant 1, mRNA.                  | -0.12 | 7.85  | 1.56E-12 | 4.52E-12 | turquoise |
| PDLIM1  | 9124   | PDZ and LIM domain 1 (elfin) (PDLIM1), mRNA.                               | 0.01  | 7.48  | 2.00E-01 | 2.37E-01 | turquoise |
| PEA15   | 8682   | phosphoprotein enriched in astrocytes 15 (PEA15), mRNA.                    | 0.04  | 8.39  | 2.77E-02 | 3.73E-02 | turquoise |
| PECAM1  | 5175   | platelet/endothelial cell adhesion molecule (CD31 antigen) (PECAM1), mRNA. | -0.13 | 10.35 | 2.34E-19 | 9.70E-19 | turquoise |
| PER2    | 8864   | period homolog 2 (Drosophila) (PER2), mRNA.                                | 0.08  | 9.35  | 2.52E-05 | 4.63E-05 | turquoise |
| PEX5    | 5830   | peroxisomal biogenesis factor 5 (PEX5), mRNA.                              | 0.68  | 6.88  | 8.44E-51 | 1.35E-49 | turquoise |
| PFN2    | 5217   | profilin 2 (PFN2), transcript variant 2, mRNA.                             | -0.07 | 7.78  | 7.28E-07 | 1.50E-06 | turquoise |
| PHACTR1 | 221692 | phosphatase and actin regulator 1 (PHACTR1), mRNA.                         | 0.08  | 7.30  | 1.68E-05 | 3.14E-05 | turquoise |
| PHACTR3 | 116154 | phosphatase and actin regulator 3 (PHACTR3), transcript variant 1, mRNA.   | 0.20  | 9.82  | 6.34E-40 | 6.32E-39 | turquoise |
| PHF21A  | 51317  | PHD finger protein 21A (PHF21A), mRNA.                                     | 0.10  | 9.43  | 6.53E-15 | 2.15E-14 | turquoise |
| PHLDA3  | 23612  | pleckstrin homology-like domain, family A, member 3 (PHLDA3), mRNA.        | -0.44 | 5.78  | 9.29E-54 | 1.70E-52 | turquoise |
| PIGV    | 55650  | phosphatidylinositol glycan anchor biosynthesis, class V (PIGV), mRNA.     | -0.05 | 7.18  | 7.38E-03 | 1.07E-02 | turquoise |

|         |        |                                                                                                   |       |       |          |          |           |
|---------|--------|---------------------------------------------------------------------------------------------------|-------|-------|----------|----------|-----------|
| PIK3CD  | 5293   | phosphoinositide-3-kinase, catalytic, delta polypeptide (PIK3CD), mRNA.                           | -0.04 | 9.84  | 1.25E-02 | 1.76E-02 | turquoise |
| PIK3IP1 | 113791 | HGFL gene (MGC17330), mRNA.                                                                       | -0.10 | 5.59  | 1.28E-08 | 2.97E-08 | turquoise |
| PIK3R1  | 5295   | phosphoinositide-3-kinase, regulatory subunit 1 (p85 alpha) (PIK3R1), transcript variant 1, mRNA. | 0.05  | 10.47 | 4.16E-03 | 6.17E-03 | turquoise |
| PIK3R6  | 146850 | chromosome 17 open reading frame 38 (C17orf38), mRNA.                                             | 0.09  | 8.55  | 4.57E-10 | 1.15E-09 | turquoise |
| PILRA   | 29992  | paired immunoglobulin-like type 2 receptor alpha (PILRA), transcript variant 1, mRNA.             | 0.31  | 9.32  | 2.47E-43 | 2.92E-42 | turquoise |
| PIM1    | 5292   | pim-1 oncogene (PIM1), mRNA.                                                                      | 0.00  | 6.44  | 7.80E-01 | 8.09E-01 | turquoise |
| PIP5K1C | 23396  | phosphatidylinositol-4-phosphate 5-kinase, type I, gamma (PIP5K1C), mRNA.                         | 0.24  | 9.01  | 1.13E-36 | 9.83E-36 | turquoise |
| PKP4    | 8502   | plakophilin 4 (PKP4), transcript variant 2, mRNA.                                                 | -0.07 | 7.23  | 5.20E-04 | 8.50E-04 | turquoise |
| PLAC8   | 51316  | placenta-specific 8 (PLAC8), mRNA.                                                                | 0.67  | 8.60  | 1.64E-78 | 1.32E-76 | turquoise |
| PLCG2   | 5336   | phospholipase C, gamma 2 (phosphatidylinositol-specific) (PLCG2), mRNA.                           | 0.00  | 8.20  | 9.90E-01 | 9.92E-01 | turquoise |
| PLEK    | 5341   | pleckstrin (PLEK), mRNA.                                                                          | 0.01  | 9.30  | 3.37E-01 | 3.82E-01 | turquoise |

|         |       |                                                                                                                                     |       |      |          |          |           |
|---------|-------|-------------------------------------------------------------------------------------------------------------------------------------|-------|------|----------|----------|-----------|
| PLEKHA1 | 59338 | pleckstrin homology domain containing, family A (phosphoinositide binding specific) member 1 (PLEKHA1), transcript variant 2, mRNA. | -0.34 | 7.23 | 2.95E-45 | 3.81E-44 | turquoise |
| PLEKHH3 | 79990 | pleckstrin homology domain containing, family H (with MyTH4 domain) member 3 (PLEKHH3), mRNA.                                       | 0.01  | 6.14 | 5.97E-01 | 6.39E-01 | turquoise |
| PLEKHO1 | 51177 | pleckstrin homology domain containing, family O member 1 (PLEKHO1), mRNA.                                                           | -0.12 | 6.77 | 7.59E-17 | 2.79E-16 | turquoise |
| PLIN2   | 123   | adipose differentiation-related protein (ADFP), mRNA.                                                                               | -0.32 | 6.97 | 2.72E-50 | 4.31E-49 | turquoise |
| PMM1    | 5372  | phosphomannomutase 1 (PMM1), mRNA.                                                                                                  | -0.02 | 7.91 | 9.36E-02 | 1.18E-01 | turquoise |
| PNP     | 4860  | nucleoside phosphorylase (NP), mRNA.                                                                                                | 0.04  | 7.94 | 6.75E-02 | 8.66E-02 | turquoise |
| PNPLA8  | 50640 | patatin-like phospholipase domain containing 8 (PNPLA8), mRNA.                                                                      | -0.17 | 6.02 | 1.45E-24 | 7.73E-24 | turquoise |
| POLB    | 5423  | polymerase (DNA directed), beta (POLB), mRNA.                                                                                       | 0.05  | 8.03 | 1.55E-02 | 2.15E-02 | turquoise |
| POLR2C  | 5432  | polymerase (RNA) II (DNA directed) polypeptide C, 33kDa (POLR2C), mRNA.                                                             | 0.35  | 7.84 | 3.83E-53 | 6.73E-52 | turquoise |

|          |       |                                                                                     |       |      |          |          |           |
|----------|-------|-------------------------------------------------------------------------------------|-------|------|----------|----------|-----------|
| POLR3K   | 51728 | polymerase (RNA) III (DNA directed) polypeptide K, 12.3 kDa (POLR3K), mRNA.         | -0.01 | 7.05 | 4.97E-01 | 5.42E-01 | turquoise |
| PPFIBP2  | 8495  | PTPRF interacting protein, binding protein 2 (liprin beta 2) (PPFIBP2), mRNA.       | -0.24 | 6.44 | 1.27E-28 | 7.87E-28 | turquoise |
| PPP1R15A | 23645 | protein phosphatase 1, regulatory (inhibitor) subunit 15A (PPP1R15A), mRNA.         | 0.63  | 8.73 | 2.13E-51 | 3.53E-50 | turquoise |
| PPP2R3C  | 55012 | protein phosphatase 2 (formerly 2A), regulatory subunit B'', gamma (PPP2R3C), mRNA. | 0.32  | 9.54 | 2.61E-45 | 3.40E-44 | turquoise |
| PPP2R5E  | 5529  | protein phosphatase 2, regulatory subunit B', epsilon isoform (PPP2R5E), mRNA.      | 0.26  | 8.45 | 1.55E-38 | 1.47E-37 | turquoise |
| PPP4R1   | 9989  | protein phosphatase 4, regulatory subunit 1 (PPP4R1), transcript variant 1, mRNA.   | 0.09  | 8.00 | 1.22E-07 | 2.65E-07 | turquoise |
| PRDM1    | 639   | PR domain containing 1, with ZNF domain (PRDM1), transcript variant 2, mRNA.        | 0.53  | 8.06 | 4.86E-67 | 1.88E-65 | turquoise |
| PRDX4    | 10549 | peroxiredoxin 4 (PRDX4), mRNA.                                                      | -0.05 | 9.74 | 2.78E-05 | 5.09E-05 | turquoise |
| PRDX6    | 9588  | peroxiredoxin 6 (PRDX6), mRNA.                                                      | 0.01  | 5.87 | 5.42E-01 | 5.86E-01 | turquoise |
| PRKAB1   | 5564  | protein kinase, AMP-activated, beta 1 non-catalytic subunit (PRKAB1), mRNA.         | 0.02  | 7.65 | 2.81E-01 | 3.24E-01 | turquoise |

|        |       |                                                                                                     |       |      |          |          |           |
|--------|-------|-----------------------------------------------------------------------------------------------------|-------|------|----------|----------|-----------|
| PRKCD  | 5580  | protein kinase C, delta (PRKCD), transcript variant 2, mRNA.                                        | -0.01 | 8.75 | 4.74E-01 | 5.19E-01 | turquoise |
| PRKCE  | 5581  | protein kinase C, epsilon (PRKCE), mRNA.                                                            | 0.03  | 8.67 | 1.70E-02 | 2.35E-02 | turquoise |
| PRMT1  | 3276  | protein arginine methyltransferase 1 (PRMT1), transcript variant 1, mRNA.                           | -0.13 | 8.40 | 1.39E-17 | 5.30E-17 | turquoise |
| PRMT6  | 55170 | protein arginine methyltransferase 6 (PRMT6), mRNA.                                                 | 0.00  | 6.19 | 9.17E-01 | 9.30E-01 | turquoise |
| PRR5   | 55615 | proline rich 5 (renal) (PRR5), transcript variant 2, mRNA.                                          | 0.15  | 9.17 | 1.46E-17 | 5.56E-17 | turquoise |
| PSEN2  | 5664  | presenilin 2 (Alzheimer disease 4) (PSEN2), transcript variant 2, mRNA.                             | 0.14  | 7.41 | 5.44E-10 | 1.37E-09 | turquoise |
| PTAFR  | 5724  | platelet-activating factor receptor (PTAFR), mRNA.                                                  | 0.06  | 8.15 | 2.88E-04 | 4.81E-04 | turquoise |
| PTK2B  | 2185  | PTK2B protein tyrosine kinase 2 beta (PTK2B), transcript variant 4, mRNA.                           | 0.00  | 6.57 | 9.82E-01 | 9.85E-01 | turquoise |
| PTPN1  | 5770  | protein tyrosine phosphatase, non-receptor type 1 (PTPN1), mRNA.                                    | 0.23  | 8.56 | 7.49E-24 | 3.84E-23 | turquoise |
| PTPN22 | 26191 | protein tyrosine phosphatase, non-receptor type 22 (lymphoid) (PTPN22), transcript variant 1, mRNA. | -0.11 | 8.74 | 2.70E-16 | 9.59E-16 | turquoise |
| PTPN6  | 5777  | protein tyrosine phosphatase, non-receptor type 6 (PTPN6), transcript variant 1, mRNA.              | 0.09  | 7.01 | 3.35E-05 | 6.10E-05 | turquoise |

|         |        |                                                                               |       |      |          |          |           |
|---------|--------|-------------------------------------------------------------------------------|-------|------|----------|----------|-----------|
| PYHIN1  | 149628 | pyrin and HIN domain family, member 1 (PYHIN1), transcript variant b1, mRNA.  | -0.20 | 7.55 | 1.10E-35 | 9.13E-35 | turquoise |
| RAB11A  | 8766   | RAB11A, member RAS oncogene family (RAB11A), mRNA.                            | 0.16  | 5.67 | 9.23E-11 | 2.42E-10 | turquoise |
| RAB2B   | 84932  | RAB2B, member RAS oncogene family (RAB2B), mRNA.                              | -0.06 | 7.91 | 1.15E-03 | 1.81E-03 | turquoise |
| RAB33A  | 9363   | RAB33A, member RAS oncogene family (RAB33A), mRNA.                            | -0.08 | 8.65 | 1.33E-07 | 2.88E-07 | turquoise |
| RAB3IP  | 117177 | RAB3A interacting protein (rabin3) (RAB3IP), transcript variant beta 1, mRNA. | -0.01 | 6.18 | 5.44E-01 | 5.88E-01 | turquoise |
| RAB9A   | 9367   | RAB9A, member RAS oncogene family (RAB9A), mRNA.                              | 0.07  | 7.31 | 6.20E-04 | 1.00E-03 | turquoise |
| RABGGTB | 5876   | Rab geranylgeranyltransferase, beta subunit (RABGGTB), mRNA.                  | 0.02  | 9.22 | 2.23E-01 | 2.62E-01 | turquoise |
| RAP2C   | 57826  | RAP2C, member of RAS oncogene family (RAP2C), mRNA.                           | -0.03 | 8.71 | 4.01E-02 | 5.29E-02 | turquoise |
| RARA    | 5914   | retinoic acid receptor, alpha (RARA), transcript variant 1, mRNA.             | -0.29 | 7.44 | 1.03E-53 | 1.87E-52 | turquoise |
| RASD1   | 51655  | RAS, dexamethasone-induced 1 (RASD1), mRNA.                                   | 0.08  | 7.14 | 5.24E-05 | 9.34E-05 | turquoise |

|         |        |                                                                                                            |       |      |          |          |           |
|---------|--------|------------------------------------------------------------------------------------------------------------|-------|------|----------|----------|-----------|
| RASGRP3 | 25780  | RAS guanyl releasing protein 3 (calcium and DAG-regulated) (RASGRP3), mRNA.                                | 0.09  | 5.79 | 4.25E-07 | 8.89E-07 | turquoise |
| RASL11A | 387496 | RAS-like, family 11, member A (RASL11A), mRNA.                                                             | 0.96  | 7.33 | 2.35E-88 | 3.98E-86 | turquoise |
| RASSF2  | 9770   | Ras association (RalGDS/AF-6) domain family 2 (RASSF2), transcript variant 1, mRNA.                        | 0.18  | 7.43 | 2.06E-23 | 1.03E-22 | turquoise |
| RASSF4  | 83937  | Ras association (RalGDS/AF-6) domain family 4 (RASSF4), mRNA.                                              | 0.15  | 8.14 | 1.01E-18 | 4.06E-18 | turquoise |
| RBPJ    | 3516   | recombination signal binding protein for immunoglobulin kappa J region (RBPJ), transcript variant 2, mRNA. | 0.18  | 6.44 | 3.20E-24 | 1.67E-23 | turquoise |
| RCSD1   | 92241  | RCSD domain containing 1 (RCSD1), mRNA.                                                                    | 0.04  | 7.24 | 4.66E-04 | 7.65E-04 | turquoise |
| RDH11   | 51109  | retinol dehydrogenase 11 (all-trans/9-cis/11-cis) (RDH11), mRNA.                                           | -0.03 | 8.43 | 1.77E-02 | 2.44E-02 | turquoise |
| REC8    | 9985   | REC8-like 1 (yeast) (REC8L1), transcript variant 2, mRNA.                                                  | 0.07  | 7.16 | 9.15E-04 | 1.46E-03 | turquoise |
| REEP5   | 7905   | receptor accessory protein 5 (REEP5), mRNA.                                                                | -0.04 | 7.13 | 3.19E-03 | 4.78E-03 | turquoise |
| RERE    | 473    | arginine-glutamic acid dipeptide (RE) repeats (RERE), transcript variant 3, mRNA.                          | -0.01 | 7.53 | 5.20E-01 | 5.65E-01 | turquoise |

|         |       |                                                                                                 |       |       |          |          |           |
|---------|-------|-------------------------------------------------------------------------------------------------|-------|-------|----------|----------|-----------|
| RETSAT  | 54884 | retinol saturase (all-trans-retinol 13,14-reductase) (RETSAT), mRNA.                            | 0.01  | 8.78  | 2.20E-01 | 2.60E-01 | turquoise |
| RFTN1   | 23180 | raftlin, lipid raft linker 1 (RFTN1), mRNA.                                                     | 0.01  | 7.86  | 4.65E-01 | 5.11E-01 | turquoise |
| RFX5    | 5993  | regulatory factor X, 5 (influences HLA class II expression) (RFX5), transcript variant 2, mRNA. | -0.07 | 10.10 | 6.61E-05 | 1.17E-04 | turquoise |
| RGCC    | 28984 | response gene to complement 32 (RGC32), mRNA.                                                   | -0.33 | 9.85  | 5.91E-55 | 1.17E-53 | turquoise |
| RGL1    | 23179 | ral guanine nucleotide dissociation stimulator-like 1 (RGL1), mRNA.                             | -0.57 | 8.67  | 2.58E-72 | 1.30E-70 | turquoise |
| RGS1    | 5996  | regulator of G-protein signalling 1 (RGS1), mRNA.                                               | -0.49 | 6.94  | 4.84E-62 | 1.48E-60 | turquoise |
| RGS14   | 10636 | regulator of G-protein signalling 14 (RGS14), mRNA.                                             | 0.13  | 6.85  | 9.65E-16 | 3.33E-15 | turquoise |
| RGS16   | 6004  | regulator of G-protein signalling 16 (RGS16), mRNA.                                             | -0.01 | 8.99  | 4.66E-01 | 5.12E-01 | turquoise |
| RGS2    | 5997  | regulator of G-protein signalling 2, 24kDa (RGS2), mRNA.                                        | -0.09 | 7.86  | 3.68E-11 | 9.86E-11 | turquoise |
| RGS20   | 8601  | regulator of G-protein signalling 20 (RGS20), transcript variant 1, mRNA.                       | -0.07 | 5.52  | 3.16E-05 | 5.77E-05 | turquoise |
| RHOB    | 388   | ras homolog gene family, member B (RHOB), mRNA.                                                 | -0.01 | 7.09  | 5.14E-01 | 5.59E-01 | turquoise |
| RHOBTB3 | 22836 | Rho-related BTB domain containing 3 (RHOBTB3), mRNA.                                            | -0.07 | 7.75  | 1.44E-04 | 2.47E-04 | turquoise |



|         |        |                                                                                    |       |       |          |          |           |
|---------|--------|------------------------------------------------------------------------------------|-------|-------|----------|----------|-----------|
| RHOG    | 391    | ras homolog gene family, member G (rho G) (RHOG), mRNA.                            | 0.05  | 8.92  | 4.47E-05 | 8.03E-05 | turquoise |
| RHOH    | 399    | ras homolog gene family, member H (RHOH), mRNA.                                    | -0.24 | 9.80  | 6.40E-22 | 2.98E-21 | turquoise |
| RIC8A   | 60626  | resistance to inhibitors of cholinesterase 8 homolog A (C. elegans) (RIC8A), mRNA. | 0.03  | 10.75 | 2.58E-02 | 3.48E-02 | turquoise |
| RIPK2   | 8767   | receptor-interacting serine-threonine kinase 2 (RIPK2), mRNA.                      | 0.04  | 10.73 | 3.18E-03 | 4.77E-03 | turquoise |
| RITA1   | 84934  | chromosome 12 open reading frame 52 (C12orf52), mRNA.                              | 0.16  | 9.65  | 2.65E-37 | 2.37E-36 | turquoise |
| RMI2    | 116028 | chromosome 16 open reading frame 75 (C16orf75), mRNA.                              | 0.03  | 6.61  | 2.25E-01 | 2.65E-01 | turquoise |
| RNASET2 | 8635   | ribonuclease T2 (RNASET2), mRNA.                                                   | -0.20 | 8.11  | 3.77E-33 | 2.78E-32 | turquoise |
| RND3    | 390    | Rho family GTPase 3 (RND3), mRNA.                                                  | -0.04 | 7.67  | 3.67E-03 | 5.47E-03 | turquoise |
| RNF114  | 55905  | zinc finger protein 313 (ZNF313), mRNA.                                            | -0.02 | 7.12  | 2.58E-01 | 3.00E-01 | turquoise |
| RNF122  | 79845  | ring finger protein 122 (RNF122), mRNA.                                            | -0.12 | 7.58  | 2.03E-18 | 8.00E-18 | turquoise |
| RNF14   | 9604   | ring finger protein 14 (RNF14), transcript variant 2, mRNA.                        | -0.11 | 6.12  | 5.74E-10 | 1.44E-09 | turquoise |
| RNGTT   | 8732   | RNA guanylyltransferase and 5'-phosphatase (RNGTT), mRNA.                          | -0.07 | 10.15 | 6.52E-06 | 1.26E-05 | turquoise |
| RPF2    | 84154  | brix domain containing 1 (BXDC1), mRNA.                                            | -0.41 | 9.12  | 1.81E-42 | 2.07E-41 | turquoise |

|        |        |                                                                                                                    |       |       |          |          |           |
|--------|--------|--------------------------------------------------------------------------------------------------------------------|-------|-------|----------|----------|-----------|
| RPL39L | 116832 | ribosomal protein L39-like (RPL39L), mRNA.                                                                         | 0.10  | 7.35  | 1.04E-10 | 2.71E-10 | turquoise |
| RRAGC  | 64121  | Ras-related GTP binding C (RRAGC), mRNA.                                                                           | 0.04  | 11.64 | 3.89E-03 | 5.77E-03 | turquoise |
| RRP15  | 51018  | ribosomal RNA processing 15 homolog (S. cerevisiae) (RRP15), mRNA.                                                 | -0.19 | 8.26  | 2.68E-21 | 1.21E-20 | turquoise |
| RRP9   | 9136   | RRP9, small subunit (SSU) processome component, homolog (yeast) (RRP9), mRNA.                                      | -0.01 | 7.23  | 3.37E-01 | 3.82E-01 | turquoise |
| RSBN1  | 54665  | round spermatid basic protein 1 (RSBN1), mRNA.                                                                     | 0.02  | 6.34  | 2.36E-01 | 2.76E-01 | turquoise |
| RTN2   | 6253   | reticulon 2 (RTN2), transcript variant 3, mRNA.                                                                    | -0.06 | 6.48  | 4.97E-04 | 8.15E-04 | turquoise |
| RTN4   | 57142  | reticulon 4 (RTN4), transcript variant 3, mRNA.                                                                    | -0.07 | 7.42  | 1.70E-06 | 3.42E-06 | turquoise |
| RUNX1  | 861    | runt-related transcription factor 1 (acute myeloid leukemia 1; aml1 oncogene) (RUNX1), transcript variant 1, mRNA. | -0.01 | 6.68  | 4.94E-01 | 5.39E-01 | turquoise |
| RUSC1  | 23623  | RUN and SH3 domain containing 1 (RUSC1), mRNA.                                                                     | -0.04 | 9.67  | 1.19E-04 | 2.06E-04 | turquoise |
| RXRA   | 6256   | retinoid X receptor, alpha (RXRA), mRNA.                                                                           | -0.13 | 10.44 | 1.33E-20 | 5.84E-20 | turquoise |
| RYBP   | 23429  | RING1 and YY1 binding protein (RYBP), mRNA.                                                                        | -0.13 | 9.27  | 2.86E-08 | 6.46E-08 | turquoise |

|         |       |                                                                                                                 |       |       |          |          |           |
|---------|-------|-----------------------------------------------------------------------------------------------------------------|-------|-------|----------|----------|-----------|
| S100A10 | 6281  | S100 calcium binding protein A10 (annexin II ligand, calpactin I, light polypeptide (p11)) (S100A10), mRNA.     | -0.01 | 8.17  | 3.62E-01 | 4.08E-01 | turquoise |
| S100A11 | 6282  | S100 calcium binding protein A11 (S100A11), mRNA.                                                               | -0.04 | 9.97  | 5.84E-04 | 9.49E-04 | turquoise |
| S1PR4   | 8698  | endothelial differentiation, lysophosphatidic acid G-protein-coupled receptor, 6 (EDG6), mRNA.                  | -0.02 | 8.33  | 1.38E-01 | 1.68E-01 | turquoise |
| SAMD4A  | 23034 | sterile alpha motif domain containing 4A (SAMD4A), mRNA.                                                        | 0.11  | 10.36 | 8.06E-19 | 3.25E-18 | turquoise |
| SAMSN1  | 64092 | SAM domain, SH3 domain and nuclear localization signals 1 (SAMSN1), mRNA.                                       | 0.13  | 10.79 | 1.10E-21 | 5.09E-21 | turquoise |
| SAP30   | 8819  | Sin3A-associated protein, 30kDa (SAP30), mRNA.                                                                  | -0.14 | 6.16  | 2.51E-14 | 8.00E-14 | turquoise |
| SASH3   | 54440 | chromosome X open reading frame 9 (CXorf9), mRNA.                                                               | -0.12 | 7.61  | 1.52E-15 | 5.18E-15 | turquoise |
| SC5D    | 6309  | sterol-C5-desaturase (ERG3 delta-5-desaturase homolog, S. cerevisiae)-like (SC5DL), transcript variant 2, mRNA. | 0.19  | 11.74 | 5.66E-27 | 3.31E-26 | turquoise |
| SCAMP1  | 9522  | secretory carrier membrane protein 1 (SCAMP1), mRNA.                                                            | 0.07  | 8.59  | 9.59E-07 | 1.96E-06 | turquoise |
| SCARB2  | 950   | scavenger receptor class B, member 2 (SCARB2), mRNA.                                                            | 0.00  | 5.80  | 9.42E-01 | 9.51E-01 | turquoise |
| SCD     | 6319  | stearoyl-CoA desaturase (delta-9-desaturase) (SCD), mRNA.                                                       | -0.16 | 10.52 | 1.72E-19 | 7.19E-19 | turquoise |

|         |        |                                                                                                                                  |       |       |          |          |           |
|---------|--------|----------------------------------------------------------------------------------------------------------------------------------|-------|-------|----------|----------|-----------|
| SCML1   | 6322   | sex comb on midleg-like 1 (Drosophila) (SCML1), transcript variant 3, mRNA.                                                      | 0.03  | 6.81  | 5.94E-02 | 7.66E-02 | turquoise |
| SCYL3   | 57147  | SCY1-like 3 (S. cerevisiae) (SCYL3), transcript variant 1, mRNA.                                                                 | -0.05 | 6.01  | 1.07E-04 | 1.86E-04 | turquoise |
| SDSL    | 113675 | serine dehydratase-like (SDSL), mRNA.                                                                                            | -0.05 | 6.64  | 6.40E-04 | 1.03E-03 | turquoise |
| SEC11A  | 23478  | SEC11 homolog A (S. cerevisiae) (SEC11A), mRNA.                                                                                  | -0.14 | 5.83  | 4.76E-17 | 1.76E-16 | turquoise |
| SEL1L3  | 23231  | KIAA0746 protein (KIAA0746), mRNA.                                                                                               | 0.01  | 5.46  | 3.78E-01 | 4.23E-01 | turquoise |
| SELL    | 6402   | selectin L (lymphocyte adhesion molecule 1) (SELL), mRNA.                                                                        | 0.10  | 7.31  | 1.07E-07 | 2.33E-07 | turquoise |
| SELT    | 51714  | selenoprotein T (SELT), mRNA.                                                                                                    | 0.06  | 7.09  | 2.34E-04 | 3.94E-04 | turquoise |
| SEMA4D  | 10507  | sema domain, immunoglobulin domain (Ig), transmembrane domain (TM) and short cytoplasmic domain, (semaphorin) 4D (SEMA4D), mRNA. | -0.12 | 7.67  | 2.18E-20 | 9.51E-20 | turquoise |
| SEPHS2  | 22928  | selenophosphate synthetase 2 (SEPHS2), mRNA.                                                                                     | 0.12  | 10.29 | 2.37E-20 | 1.03E-19 | turquoise |
| SERINC2 | 347735 | serine incorporator 2 (SERINC2), mRNA.                                                                                           | 0.09  | 9.55  | 1.10E-16 | 3.99E-16 | turquoise |
| SERINC3 | 10955  | serine incorporator 3 (SERINC3), transcript variant 2, mRNA.                                                                     | 0.00  | 9.55  | 9.85E-01 | 9.87E-01 | turquoise |
| SERTAD2 | 9792   | SERTA domain containing 2 (SERTAD2), mRNA.                                                                                       | 0.01  | 10.83 | 3.49E-01 | 3.94E-01 | turquoise |

|          |        |                                                                  |       |       |          |          |           |
|----------|--------|------------------------------------------------------------------|-------|-------|----------|----------|-----------|
| SERTAD3  | 29946  | SERTA domain containing 3 (SERTAD3), transcript variant 2, mRNA. | -0.01 | 6.62  | 5.10E-01 | 5.55E-01 | turquoise |
| SESN1    | 27244  | sestrin 1 (SESN1), mRNA.                                         | 0.01  | 12.82 | 4.59E-01 | 5.05E-01 | turquoise |
| SETBP1   | 26040  | SET binding protein 1 (SETBP1), mRNA.                            | 0.10  | 9.40  | 1.63E-08 | 3.75E-08 | turquoise |
| SETD6    | 79918  | SET domain containing 6 (SETD6), mRNA.                           | -0.09 | 6.03  | 7.98E-08 | 1.75E-07 | turquoise |
| SFT2D1   | 113402 | SFT2 domain containing 1 (SFT2D1), mRNA.                         | 0.07  | 6.98  | 8.32E-06 | 1.59E-05 | turquoise |
| SGK1     | 6446   | serum/glucocorticoid regulated kinase (SGK), mRNA.               | -0.12 | 9.96  | 1.00E-13 | 3.10E-13 | turquoise |
| SH2B2    | 10603  | SH2B adaptor protein 2 (SH2B2), mRNA.                            | -0.20 | 8.59  | 3.15E-35 | 2.55E-34 | turquoise |
| SH2B3    | 10019  | SH2B adaptor protein 3 (SH2B3), mRNA.                            | -0.07 | 8.46  | 9.21E-04 | 1.46E-03 | turquoise |
| SH2D3C   | 10044  | SH2 domain containing 3C (SH2D3C), transcript variant 2, mRNA.   | 0.01  | 6.99  | 6.19E-01 | 6.60E-01 | turquoise |
| SH3PXD2A | 9644   | SH3 and PX domains 2A (SH3PXD2A), mRNA.                          | -0.05 | 8.26  | 1.04E-04 | 1.80E-04 | turquoise |
| SHROOM3  | 57619  | shroom family member 3 (SHROOM3), mRNA.                          | -0.02 | 8.76  | 2.39E-01 | 2.79E-01 | turquoise |
| SIDT2    | 51092  | SID1 transmembrane family, member 2 (SIDT2), mRNA.               | 0.02  | 7.26  | 2.50E-01 | 2.90E-01 | turquoise |
| SKIDA1   | 730417 | PREDICTED: hypothetical protein LOC730417 (LOC730417), mRNA.     | 0.06  | 7.99  | 3.54E-02 | 4.70E-02 | turquoise |

|          |        |                                                                                                               |       |      |          |          |           |
|----------|--------|---------------------------------------------------------------------------------------------------------------|-------|------|----------|----------|-----------|
| SLAMF1   | 6504   | signaling lymphocytic activation molecule family member 1 (SLAMF1), mRNA.                                     | 0.04  | 8.87 | 2.58E-02 | 3.48E-02 | turquoise |
| SLAMF7   | 57823  | SLAM family member 7 (SLAMF7), mRNA.                                                                          | -0.09 | 8.84 | 3.61E-11 | 9.66E-11 | turquoise |
| SLBP     | 7884   | stem-loop (histone) binding protein (SLBP), mRNA.                                                             | -0.05 | 7.61 | 1.21E-03 | 1.90E-03 | turquoise |
| SLC15A3  | 51296  | solute carrier family 15, member 3 (SLC15A3), mRNA.                                                           | -0.48 | 6.46 | 1.33E-52 | 2.29E-51 | turquoise |
| SLC15A4  | 121260 | solute carrier family 15, member 4 (SLC15A4), mRNA.                                                           | -0.27 | 5.43 | 3.98E-25 | 2.17E-24 | turquoise |
| SLC16A10 | 117247 | solute carrier family 16, member 10 (aromatic amino acid transporter) (SLC16A10), mRNA.                       | -0.02 | 6.79 | 1.25E-01 | 1.54E-01 | turquoise |
| SLC16A3  | 9123   | solute carrier family 16, member 3 (monocarboxylic acid transporter 4) (SLC16A3), transcript variant 3, mRNA. | 0.01  | 8.55 | 7.38E-01 | 7.69E-01 | turquoise |
| SLC16A9  | 220963 | solute carrier family 16, member 9 (monocarboxylic acid transporter 9) (SLC16A9), mRNA.                       | -0.07 | 9.08 | 3.65E-06 | 7.17E-06 | turquoise |
| SLC18B1  | 116843 | chromosome 6 open reading frame 192 (C6orf192), mRNA.                                                         | 0.31  | 8.72 | 2.61E-35 | 2.11E-34 | turquoise |

|         |       |                                                                                                                                                           |       |      |          |          |           |
|---------|-------|-----------------------------------------------------------------------------------------------------------------------------------------------------------|-------|------|----------|----------|-----------|
| SLC1A1  | 6505  | solute carrier family 1 (neuronal/epithelial high affinity glutamate transporter, system Xag), member 1 (SLC1A1), mRNA.                                   | -0.52 | 6.07 | 5.41E-54 | 1.02E-52 | turquoise |
| SLC1A4  | 6509  | solute carrier family 1 (glutamate/neutral amino acid transporter), member 4 (SLC1A4), mRNA.                                                              | 0.70  | 8.77 | 9.64E-59 | 2.47E-57 | turquoise |
| SLC25A4 | 291   | solute carrier family 25 (mitochondrial carrier; adenine nucleotide translocator), member 4 (SLC25A4), nuclear gene encoding mitochondrial protein, mRNA. | -0.17 | 8.77 | 8.63E-24 | 4.41E-23 | turquoise |
| SLC27A2 | 11001 | solute carrier family 27 (fatty acid transporter), member 2 (SLC27A2), mRNA.                                                                              | -0.11 | 8.18 | 2.33E-14 | 7.44E-14 | turquoise |
| SLC2A5  | 6518  | solute carrier family 2 (facilitated glucose/fructose transporter), member 5 (SLC2A5), mRNA.                                                              | -0.19 | 7.61 | 1.19E-33 | 8.98E-33 | turquoise |
| SLC35D2 | 11046 | solute carrier family 35, member D2 (SLC35D2), mRNA.                                                                                                      | -0.08 | 7.90 | 2.85E-12 | 8.14E-12 | turquoise |
| SLC35E3 | 55508 | solute carrier family 35, member E3 (SLC35E3), mRNA.                                                                                                      | 0.04  | 6.66 | 5.34E-04 | 8.72E-04 | turquoise |

|         |        |                                                                                                      |       |       |              |              |           |
|---------|--------|------------------------------------------------------------------------------------------------------|-------|-------|--------------|--------------|-----------|
| SLC35F2 | 54733  | solute carrier family 35,<br>member F2 (SLC35F2),<br>mRNA.                                           | 0.02  | 7.43  | 2.27E-<br>01 | 2.67E-<br>01 | turquoise |
| SLC37A2 | 729049 | PREDICTED: similar to T-box<br>1 isoform C (LOC729049),<br>mRNA.                                     | 0.61  | 6.09  | 1.60E-<br>58 | 4.04E-<br>57 | turquoise |
| SLC38A1 | 81539  | solute carrier family 38,<br>member 1 (SLC38A1),<br>transcript variant 2, mRNA.                      | 0.03  | 6.11  | 2.28E-<br>02 | 3.10E-<br>02 | turquoise |
| SLC38A2 | 54407  | solute carrier family 38,<br>member 2 (SLC38A2), mRNA.                                               | 0.78  | 9.32  | 3.02E-<br>90 | 6.39E-<br>88 | turquoise |
| SLC41A2 | 84102  | solute carrier family 41,<br>member 2 (SLC41A2), mRNA.                                               | 0.06  | 7.91  | 2.52E-<br>04 | 4.24E-<br>04 | turquoise |
| SLC43A2 | 124935 | solute carrier family 43,<br>member 2 (SLC43A2), mRNA.                                               | -0.02 | 7.18  | 1.73E-<br>01 | 2.07E-<br>01 | turquoise |
| SLC44A1 | 23446  | solute carrier family 44,<br>member 1 (SLC44A1), mRNA.                                               | 0.10  | 6.89  | 1.99E-<br>14 | 6.40E-<br>14 | turquoise |
| SLC44A2 | 57153  | solute carrier family 44,<br>member 2 (SLC44A2), mRNA.                                               | -0.04 | 6.08  | 2.96E-<br>02 | 3.97E-<br>02 | turquoise |
| SLC45A3 | 85414  | solute carrier family 45,<br>member 3 (SLC45A3), mRNA.                                               | -0.07 | 10.70 | 2.45E-<br>07 | 5.21E-<br>07 | turquoise |
| SLC6A4  | 6532   | solute carrier family 6<br>(neurotransmitter transporter,<br>serotonin), member 4<br>(SLC6A4), mRNA. | -0.17 | 7.89  | 1.84E-<br>22 | 8.76E-<br>22 | turquoise |



|         |       |                                                                                                    |       |       |          |          |           |
|---------|-------|----------------------------------------------------------------------------------------------------|-------|-------|----------|----------|-----------|
| SLC7A7  | 9056  | solute carrier family 7 (cationic amino acid transporter, y+ system), member 7 (SLC7A7), mRNA.     | 0.00  | 5.61  | 7.89E-01 | 8.16E-01 | turquoise |
| SLC8A3  | 6547  | solute carrier family 8 (sodium-calcium exchanger), member 3 (SLC8A3), transcript variant b, mRNA. | -0.10 | 8.17  | 8.21E-11 | 2.16E-10 | turquoise |
| SLCO4A1 | 28231 | solute carrier organic anion transporter family, member 4A1 (SLCO4A1), mRNA.                       | -0.04 | 11.15 | 1.18E-04 | 2.04E-04 | turquoise |
| SLCO5A1 | 81796 | solute carrier organic anion transporter family, member 5A1 (SLCO5A1), mRNA.                       | -0.06 | 8.58  | 2.64E-03 | 3.98E-03 | turquoise |
| SLFN12  | 55106 | schlafen family member 12 (SLFN12), mRNA.                                                          | 0.11  | 8.57  | 1.12E-18 | 4.49E-18 | turquoise |
| SMAD4   | 4089  | SMAD family member 4 (SMAD4), mRNA.                                                                | -0.07 | 9.17  | 7.08E-05 | 1.25E-04 | turquoise |
| SMAD5   | 4090  | SMAD family member 5 (SMAD5), transcript variant 3, mRNA.                                          | 0.26  | 6.12  | 9.91E-30 | 6.36E-29 | turquoise |
| SMAP2   | 64744 | stromal membrane-associated protein 1-like (SMAP1L), mRNA.                                         | 0.03  | 8.51  | 1.04E-01 | 1.30E-01 | turquoise |
| SMC6    | 79677 | structural maintenance of chromosomes 6 (SMC6), mRNA.                                              | -0.63 | 9.32  | 3.21E-74 | 1.79E-72 | turquoise |
| SMIM3   | 85027 | MSTP150 (MST150), mRNA.                                                                            | -0.12 | 9.15  | 5.51E-22 | 2.57E-21 | turquoise |

|         |        |                                                                                                        |       |       |          |          |           |
|---------|--------|--------------------------------------------------------------------------------------------------------|-------|-------|----------|----------|-----------|
| SMYD3   | 64754  | SET and MYND domain containing 3 (SMYD3), mRNA.                                                        | -0.05 | 6.02  | 8.14E-05 | 1.43E-04 | turquoise |
| SNRNP70 | 6625   | small nuclear ribonucleoprotein 70kDa polypeptide (RNP antigen) (SNRNP70), transcript variant 2, mRNA. | 0.07  | 9.53  | 3.37E-06 | 6.63E-06 | turquoise |
| SNX2    | 6643   | sorting nexin 2 (SNX2), mRNA.                                                                          | -0.12 | 6.91  | 4.60E-18 | 1.79E-17 | turquoise |
| SNX25   | 83891  | sorting nexin 25 (SNX25), mRNA.                                                                        | 0.10  | 6.81  | 1.59E-07 | 3.42E-07 | turquoise |
| SNX4    | 8723   | sorting nexin 4 (SNX4), mRNA.                                                                          | 0.08  | 9.91  | 3.45E-05 | 6.26E-05 | turquoise |
| SNX8    | 29886  | sorting nexin 8 (SNX8), mRNA.                                                                          | -0.01 | 7.69  | 5.76E-01 | 6.19E-01 | turquoise |
| SOCS1   | 8651   | suppressor of cytokine signaling 1 (SOCS1), mRNA.                                                      | 0.03  | 7.67  | 4.66E-02 | 6.10E-02 | turquoise |
| SOCS2   | 8835   | suppressor of cytokine signaling 2 (SOCS2), mRNA.                                                      | 0.01  | 10.74 | 4.23E-01 | 4.69E-01 | turquoise |
| SOGA1   | 140710 | chromosome 20 open reading frame 117 (C20orf117), transcript variant 2, mRNA.                          | -0.13 | 8.16  | 2.31E-17 | 8.70E-17 | turquoise |
| SORT1   | 6272   | sortilin 1 (SORT1), mRNA.                                                                              | 0.13  | 6.96  | 3.93E-12 | 1.11E-11 | turquoise |
| SOX4    | 6659   | SRY (sex determining region Y)-box 4 (SOX4), mRNA.                                                     | 0.00  | 8.16  | 9.95E-01 | 9.96E-01 | turquoise |
| SOX9    | 6662   | SRY (sex determining region Y)-box 9 (campomelic dysplasia, autosomal sex-reversal) (SOX9), mRNA.      | 0.09  | 8.77  | 1.84E-12 | 5.31E-12 | turquoise |
| SPATS2L | 26010  | DNA polymerase-transactivated protein 6 (DNAPT6), mRNA.                                                | -0.21 | 8.10  | 1.83E-22 | 8.70E-22 | turquoise |

|        |       |                                                                                                      |       |       |          |          |           |
|--------|-------|------------------------------------------------------------------------------------------------------|-------|-------|----------|----------|-----------|
| SPC25  | 57405 | SPC25, NDC80 kinetochore complex component, homolog ( <i>S. cerevisiae</i> ) (SPC25), mRNA.          | 0.00  | 5.39  | 9.34E-01 | 9.44E-01 | turquoise |
| SPIB   | 6689  | Spi-B transcription factor (Spi-1/PU.1 related) (SPIB), mRNA.                                        | -0.05 | 9.84  | 2.29E-03 | 3.48E-03 | turquoise |
| SPR    | 6697  | sepiapterin reductase (7,8-dihydrobiopterin:NADP+ oxidoreductase) (SPR), mRNA.                       | -0.10 | 8.01  | 1.85E-12 | 5.34E-12 | turquoise |
| SQSTM1 | 8878  | sequestosome 1 (SQSTM1), mRNA.                                                                       | 0.14  | 6.49  | 4.32E-13 | 1.29E-12 | turquoise |
| SRC    | 6714  | v-src sarcoma (Schmidt-Ruppin A-2) viral oncogene homolog (avian) (SRC), transcript variant 1, mRNA. | 0.07  | 7.68  | 1.45E-06 | 2.93E-06 | turquoise |
| SREBF1 | 6720  | sterol regulatory element binding transcription factor 1 (SREBF1), transcript variant 1, mRNA.       | -0.40 | 6.71  | 8.34E-45 | 1.05E-43 | turquoise |
| SRGN   | 5552  | serglycin (SRGN), mRNA.                                                                              | -0.07 | 7.25  | 4.21E-03 | 6.24E-03 | turquoise |
| SRI    | 6717  | sorcin (SRI), transcript variant 1, mRNA.                                                            | -0.17 | 7.17  | 1.54E-23 | 7.77E-23 | turquoise |
| SRPRB  | 58477 | signal recognition particle receptor, B subunit (SRPRB), mRNA.                                       | -0.05 | 6.33  | 6.95E-04 | 1.12E-03 | turquoise |
| ST13   | 6767  | suppression of tumorigenicity 13 (colon carcinoma) (Hsp70 interacting protein) (ST13), mRNA.         | -0.04 | 10.67 | 1.02E-02 | 1.44E-02 | turquoise |

|          |       |                                                                                                    |       |       |          |          |           |
|----------|-------|----------------------------------------------------------------------------------------------------|-------|-------|----------|----------|-----------|
| ST3GAL1  | 6482  | ST3 beta-galactoside alpha-2,3-sialyltransferase 1 (ST3GAL1), transcript variant 2, mRNA.          | 0.20  | 5.79  | 1.24E-22 | 5.99E-22 | turquoise |
| ST3GAL5  | 8869  | ST3 beta-galactoside alpha-2,3-sialyltransferase 5 (ST3GAL5), transcript variant 1, mRNA.          | 0.11  | 5.54  | 2.96E-10 | 7.55E-10 | turquoise |
| ST6GAL1  | 6480  | ST6 beta-galactosamide alpha-2,6-sialyltransferase 1 (ST6GAL1), transcript variant 3, mRNA.        | -0.05 | 7.55  | 2.08E-03 | 3.19E-03 | turquoise |
| ST8SIA4  | 7903  | ST8 alpha-N-acetylneuraminide alpha-2,8-sialyltransferase 4 (ST8SIA4), transcript variant 2, mRNA. | -0.03 | 9.78  | 1.88E-02 | 2.58E-02 | turquoise |
| STAG3    | 10734 | stromal antigen 3 (STAG3), mRNA.                                                                   | -0.03 | 7.45  | 1.73E-01 | 2.08E-01 | turquoise |
| STAMBPL1 | 57559 | STAM binding protein-like 1 (STAMBPL1), mRNA.                                                      | -0.17 | 9.66  | 7.20E-23 | 3.54E-22 | turquoise |
| STIM1    | 6786  | stromal interaction molecule 1 (STIM1), mRNA.                                                      | 0.01  | 5.92  | 3.72E-01 | 4.18E-01 | turquoise |
| STIP1    | 10963 | stress-induced-phosphoprotein 1 (Hsp70/Hsp90-organizing protein) (STIP1), mRNA.                    | 0.07  | 8.60  | 1.98E-04 | 3.35E-04 | turquoise |
| STK17B   | 9262  | serine/threonine kinase 17b (STK17B), mRNA.                                                        | 0.01  | 12.13 | 4.11E-01 | 4.57E-01 | turquoise |

|         |       |                                                                                        |       |      |          |          |           |
|---------|-------|----------------------------------------------------------------------------------------|-------|------|----------|----------|-----------|
| STK24   | 8428  | serine/threonine kinase 24 (STE20 homolog, yeast) (STK24), transcript variant 2, mRNA. | -0.51 | 8.59 | 2.16E-66 | 8.11E-65 | turquoise |
| STK38   | 11329 | serine/threonine kinase 38 (STK38), mRNA.                                              | 0.01  | 7.98 | 4.35E-01 | 4.82E-01 | turquoise |
| STK38L  | 23012 | serine/threonine kinase 38 like (STK38L), mRNA.                                        | -0.05 | 9.15 | 1.82E-03 | 2.80E-03 | turquoise |
| STMN1   | 3925  | stathmin 1/oncoprotein 18 (STMN1), transcript variant 1, mRNA.                         | 0.40  | 9.69 | 6.66E-57 | 1.49E-55 | turquoise |
| STOM    | 2040  | stomatin (STOM), transcript variant 2, mRNA.                                           | 0.03  | 6.73 | 1.32E-02 | 1.85E-02 | turquoise |
| STRBP   | 55342 | spermatid perinuclear RNA binding protein (STRBP), mRNA.                               | -0.01 | 6.50 | 7.32E-01 | 7.64E-01 | turquoise |
| STX7    | 8417  | syntaxin 7 (STX7), mRNA.                                                               | -0.02 | 7.73 | 2.67E-01 | 3.09E-01 | turquoise |
| SUCLG2  | 8801  | succinate-CoA ligase, GDP-forming, beta subunit (SUCLG2), mRNA.                        | 0.48  | 7.08 | 5.59E-84 | 6.75E-82 | turquoise |
| SYNPO2L | 79933 | synaptopodin 2-like (SYNPO2L), mRNA.                                                   | -0.12 | 9.73 | 6.71E-19 | 2.72E-18 | turquoise |
| SYTL3   | 94120 | synaptotagmin-like 3 (SYTL3), mRNA.                                                    | 0.09  | 7.16 | 1.75E-08 | 4.00E-08 | turquoise |
| TANK    | 10010 | TRAF family member-associated NFkB activator (TANK), transcript variant 1, mRNA.       | 0.10  | 9.34 | 8.13E-10 | 2.02E-09 | turquoise |
| TAP1    | 6890  | transporter 1, ATP-binding cassette, sub-family B (MDR/TAP) (TAP1), mRNA.              | -0.05 | 8.36 | 7.32E-04 | 1.18E-03 | turquoise |

|          |        |                                                                                               |       |      |          |          |           |
|----------|--------|-----------------------------------------------------------------------------------------------|-------|------|----------|----------|-----------|
| TBC1D22B | 55633  | TBC1 domain family, member 22B (TBC1D22B), mRNA.                                              | -0.06 | 8.52 | 5.84E-08 | 1.29E-07 | turquoise |
| TBC1D9   | 23158  | TBC1 domain family, member 9 (with GRAM domain) (TBC1D9), mRNA.                               | -0.10 | 8.88 | 4.48E-13 | 1.34E-12 | turquoise |
| TBCD     | 6904   | tubulin folding cofactor D (TBCD), mRNA.                                                      | 0.01  | 5.48 | 3.28E-01 | 3.72E-01 | turquoise |
| TCF4     | 6925   | transcription factor 4 (TCF4), mRNA.                                                          | 0.00  | 8.80 | 9.26E-01 | 9.37E-01 | turquoise |
| TDG      | 6996   | thymine-DNA glycosylase (TDG), mRNA.                                                          | 0.02  | 8.68 | 6.50E-02 | 8.36E-02 | turquoise |
| TESK2    | 10420  | testis-specific kinase 2 (TESK2), mRNA.                                                       | -0.63 | 6.78 | 2.20E-72 | 1.11E-70 | turquoise |
| TEX9     | 374618 | testis expressed sequence 9 (TEX9), mRNA.                                                     | 0.08  | 8.66 | 4.96E-06 | 9.64E-06 | turquoise |
| TFPI2    | 7980   | tissue factor pathway inhibitor 2 (TFPI2), mRNA.                                              | -0.23 | 8.26 | 1.53E-37 | 1.39E-36 | turquoise |
| TGFB1I1  | 7041   | transforming growth factor beta 1 induced transcript 1 (TGFB1I1), transcript variant 1, mRNA. | -0.03 | 7.34 | 4.02E-02 | 5.31E-02 | turquoise |
| TGFBR3   | 7049   | transforming growth factor, beta receptor III (TGFBR3), mRNA.                                 | -0.03 | 8.52 | 1.34E-01 | 1.64E-01 | turquoise |
| THAP11   | 57215  | THAP domain containing 11 (THAP11), mRNA.                                                     | 0.03  | 7.61 | 9.54E-02 | 1.20E-01 | turquoise |
| THOP1    | 7064   | thimet oligopeptidase 1 (THOP1), mRNA.                                                        | 0.08  | 8.73 | 3.14E-07 | 6.62E-07 | turquoise |
| TIPARP   | 25976  | TCDD-inducible poly(ADP-ribose) polymerase (TIPARP), mRNA.                                    | 0.04  | 6.35 | 1.09E-02 | 1.54E-02 | turquoise |

|          |        |                                                                                 |       |       |          |          |           |
|----------|--------|---------------------------------------------------------------------------------|-------|-------|----------|----------|-----------|
| TJP2     | 9414   | tight junction protein 2 (zona occludens 2) (TJP2), transcript variant 1, mRNA. | -0.24 | 7.42  | 1.37E-41 | 1.47E-40 | turquoise |
| TK1      | 7083   | thymidine kinase 1, soluble (TK1), mRNA.                                        | -0.01 | 6.21  | 6.30E-01 | 6.70E-01 | turquoise |
| TLE1     | 7088   | transducin-like enhancer of split 1 (E(sp1) homolog, Drosophila) (TLE1), mRNA.  | 0.04  | 5.95  | 8.37E-04 | 1.34E-03 | turquoise |
| TLR10    | 81793  | toll-like receptor 10 (TLR10), transcript variant 2, mRNA.                      | -0.11 | 5.78  | 1.18E-08 | 2.74E-08 | turquoise |
| TM7SF3   | 51768  | transmembrane 7 superfamily member 3 (TM7SF3), mRNA.                            | 0.01  | 11.91 | 5.75E-01 | 6.18E-01 | turquoise |
| TMC6     | 11322  | transmembrane channel-like 6 (TMC6), mRNA.                                      | 0.02  | 7.28  | 3.10E-01 | 3.55E-01 | turquoise |
| TMC8     | 147138 | transmembrane channel-like 8 (TMC8), mRNA.                                      | -0.34 | 9.12  | 3.82E-58 | 9.32E-57 | turquoise |
| TMCO3    | 55002  | transmembrane and coiled-coil domains 3 (TMCO3), mRNA.                          | 0.48  | 10.71 | 6.78E-69 | 2.87E-67 | turquoise |
| TMEM120A | 83862  | transmembrane protein induced by tumor necrosis factor alpha (TMPIT), mRNA.     | 0.50  | 7.12  | 3.00E-71 | 1.44E-69 | turquoise |
| TMEM126A | 84233  | transmembrane protein 126A (TMEM126A), mRNA.                                    | -0.17 | 6.99  | 2.89E-25 | 1.58E-24 | turquoise |
| TMEM138  | 51524  | transmembrane protein 138 (TMEM138), mRNA.                                      | -0.24 | 6.56  | 7.13E-42 | 7.84E-41 | turquoise |
| TMEM14C  | 51522  | transmembrane protein 14C (TMEM14C), mRNA.                                      | 0.54  | 6.84  | 9.43E-57 | 2.08E-55 | turquoise |

|         |        |                                                                     |       |       |          |          |           |
|---------|--------|---------------------------------------------------------------------|-------|-------|----------|----------|-----------|
| TMEM173 | 340061 | transmembrane protein 173 (TMEM173), mRNA.                          | -0.03 | 8.11  | 5.45E-03 | 7.98E-03 | turquoise |
| TMEM177 | 80775  | transmembrane protein 177 (TMEM177), mRNA.                          | 0.04  | 8.29  | 2.05E-03 | 3.14E-03 | turquoise |
| TMEM2   | 23670  | transmembrane protein 2 (TMEM2), mRNA.                              | -0.02 | 10.46 | 1.37E-01 | 1.67E-01 | turquoise |
| TMEM201 | 199953 | hypothetical protein LOC199953 (RP13-15M17.2), mRNA.                | -0.08 | 8.70  | 6.49E-06 | 1.25E-05 | turquoise |
| TMEM217 | 221468 | chromosome 6 open reading frame 128 (C6orf128), mRNA.               | -0.04 | 7.57  | 1.97E-03 | 3.02E-03 | turquoise |
| TMEM243 | 79161  | chromosome 7 open reading frame 23 (C7orf23), mRNA.                 | -0.05 | 7.06  | 7.42E-04 | 1.19E-03 | turquoise |
| TMEM41B | 440026 | transmembrane protein 41B (TMEM41B), mRNA.                          | -0.18 | 6.45  | 1.06E-26 | 6.13E-26 | turquoise |
| TMEM44  | 93109  | transmembrane protein 44 (TMEM44), transcript variant 2, mRNA.      | -0.27 | 6.47  | 1.17E-19 | 4.92E-19 | turquoise |
| TMEM97  | 27346  | transmembrane protein 97 (TMEM97), mRNA.                            | -0.12 | 6.89  | 3.66E-11 | 9.79E-11 | turquoise |
| TMOD1   | 7111   | tropomodulin 1 (TMOD1), mRNA.                                       | -0.07 | 9.33  | 1.61E-05 | 3.02E-05 | turquoise |
| TMPO    | 7112   | thymopoietin (TMPO), transcript variant 3, mRNA.                    | -0.19 | 7.63  | 6.48E-27 | 3.79E-26 | turquoise |
| TMSB15B | 286527 | hypothetical protein MGC39900 (MGC39900), mRNA.                     | 0.07  | 8.74  | 1.89E-05 | 3.52E-05 | turquoise |
| TMUB1   | 83590  | transmembrane and ubiquitin-like domain containing 1 (TMUB1), mRNA. | -0.31 | 7.13  | 4.13E-40 | 4.16E-39 | turquoise |



|          |       |                                                                                              |       |       |          |          |           |
|----------|-------|----------------------------------------------------------------------------------------------|-------|-------|----------|----------|-----------|
| TMX1     | 81542 | thioredoxin domain containing 1 (TXNDC1), mRNA.                                              | -0.15 | 7.90  | 2.16E-18 | 8.50E-18 | turquoise |
| TNF      | 7124  | tumor necrosis factor (TNF superfamily, member 2) (TNF), mRNA.                               | -0.05 | 10.58 | 6.88E-07 | 1.42E-06 | turquoise |
| TNFAIP3  | 7128  | tumor necrosis factor, alpha-induced protein 3 (TNFAIP3), mRNA.                              | 0.14  | 8.58  | 1.09E-13 | 3.34E-13 | turquoise |
| TNFRSF17 | 608   | tumor necrosis factor receptor superfamily, member 17 (TNFRSF17), mRNA.                      | -0.04 | 6.64  | 1.56E-02 | 2.17E-02 | turquoise |
| TNFSF11  | 8600  | tumor necrosis factor (ligand) superfamily, member 11 (TNFSF11), transcript variant 1, mRNA. | 0.33  | 6.53  | 2.63E-31 | 1.80E-30 | turquoise |
| TNFSF13B | 10673 | tumor necrosis factor (ligand) superfamily, member 13b (TNFSF13B), mRNA.                     | 0.03  | 8.93  | 2.67E-03 | 4.02E-03 | turquoise |
| TNFSF14  | 8740  | tumor necrosis factor (ligand) superfamily, member 14 (TNFSF14), transcript variant 1, mRNA. | 0.57  | 8.44  | 1.36E-64 | 4.82E-63 | turquoise |
| TNFSF9   | 8744  | tumor necrosis factor (ligand) superfamily, member 9 (TNFSF9), mRNA.                         | 0.04  | 10.18 | 8.25E-04 | 1.32E-03 | turquoise |
| TNIP2    | 79155 | TNFAIP3 interacting protein 2 (TNIP2), mRNA.                                                 | -0.18 | 5.76  | 8.27E-22 | 3.84E-21 | turquoise |

|          |       |                                                                               |       |       |          |          |           |
|----------|-------|-------------------------------------------------------------------------------|-------|-------|----------|----------|-----------|
| TNPO2    | 30000 | transportin 2 (importin 3, karyopherin beta 2b) (TNPO2), mRNA.                | -0.37 | 7.06  | 1.69E-61 | 5.10E-60 | turquoise |
| TNS3     | 64759 | tensin 3 (TNS3), mRNA.                                                        | 0.35  | 6.94  | 2.82E-37 | 2.52E-36 | turquoise |
| TP53BP2  | 7159  | tumor protein p53 binding protein, 2 (TP53BP2), transcript variant 1, mRNA.   | 0.02  | 10.44 | 9.00E-02 | 1.14E-01 | turquoise |
| TP63     | 8626  | tumor protein p73-like (TP73L), mRNA.                                         | 0.07  | 8.18  | 1.97E-07 | 4.22E-07 | turquoise |
| TPST2    | 8459  | tyrosylprotein sulfotransferase 2 (TPST2), transcript variant 1, mRNA.        | -0.13 | 7.12  | 2.53E-16 | 9.02E-16 | turquoise |
| TRAF1    | 7185  | TNF receptor-associated factor 1 (TRAF1), mRNA.                               | -0.13 | 7.85  | 2.51E-15 | 8.44E-15 | turquoise |
| TRAF3IP3 | 80342 | TRAF3 interacting protein 3 (TRAF3IP3), mRNA.                                 | 0.03  | 10.76 | 9.45E-02 | 1.19E-01 | turquoise |
| TRAFD1   | 10906 | TRAF-type zinc finger domain containing 1 (TRAFD1), mRNA.                     | 0.05  | 9.03  | 2.63E-03 | 3.96E-03 | turquoise |
| TRAPPC2  | 6399  | trafficking protein particle complex 2 (TRAPPC2), transcript variant 1, mRNA. | -0.28 | 7.44  | 2.74E-31 | 1.86E-30 | turquoise |
| TRIAP1   | 51499 | TP53 regulated inhibitor of apoptosis 1 (TRIAP1), mRNA.                       | -0.06 | 8.52  | 4.47E-02 | 5.87E-02 | turquoise |
| TRIB1    | 10221 | tribbles homolog 1 (Drosophila) (TRIB1), mRNA.                                | -0.05 | 6.31  | 1.54E-02 | 2.14E-02 | turquoise |
| TRIM8    | 81603 | tripartite motif-containing 8 (TRIM8), mRNA.                                  | -0.05 | 8.45  | 2.75E-04 | 4.61E-04 | turquoise |

|         |        |                                                                             |       |      |          |          |           |
|---------|--------|-----------------------------------------------------------------------------|-------|------|----------|----------|-----------|
| TRIOBP  | 11078  | TRIO and F-actin binding protein (TRIOBP), transcript variant 6, mRNA.      | 0.06  | 5.99 | 1.18E-05 | 2.23E-05 | turquoise |
| TRIP6   | 7205   | thyroid hormone receptor interactor 6 (TRIP6), mRNA.                        | 0.11  | 7.68 | 4.41E-10 | 1.11E-09 | turquoise |
| TRMT11  | 60487  | tRNA methyltransferase 11 homolog ( <i>S. cerevisiae</i> ) (TRMT11), mRNA.  | 0.01  | 5.98 | 6.19E-01 | 6.60E-01 | turquoise |
| TSC22D3 | 1831   | TSC22 domain family, member 3 (TSC22D3), transcript variant 2, mRNA.        | -0.06 | 7.66 | 3.78E-04 | 6.25E-04 | turquoise |
| TSR1    | 55720  | TSR1, 20S rRNA accumulation, homolog ( <i>S. cerevisiae</i> ) (TSR1), mRNA. | 0.03  | 8.24 | 5.31E-02 | 6.90E-02 | turquoise |
| TTC19   | 54902  | tetratricopeptide repeat domain 19 (TTC19), mRNA.                           | 0.02  | 7.74 | 1.02E-01 | 1.27E-01 | turquoise |
| TTC32   | 130502 | tetratricopeptide repeat domain 32 (TTC32), mRNA.                           | -0.02 | 8.32 | 2.62E-01 | 3.04E-01 | turquoise |
| TTC38   | 55020  | hypothetical protein FLJ20699 (FLJ20699), mRNA.                             | 0.13  | 8.07 | 1.35E-17 | 5.17E-17 | turquoise |
| TTC39C  | 125488 | chromosome 18 open reading frame 17 (C18orf17), mRNA.                       | 0.07  | 8.07 | 2.75E-04 | 4.61E-04 | turquoise |
| TTC5    | 91875  | tetratricopeptide repeat domain 5 (TTC5), mRNA.                             | -0.16 | 8.85 | 5.12E-24 | 2.64E-23 | turquoise |
| TXNIP   | 10628  | thioredoxin interacting protein (TXNIP), mRNA.                              | -0.18 | 6.36 | 1.27E-15 | 4.36E-15 | turquoise |
| TXNRD1  | 7296   | thioredoxin reductase 1 (TXNRD1), transcript variant 1, mRNA.               | -0.09 | 9.81 | 2.99E-09 | 7.20E-09 | turquoise |

|         |        |                                                                                                                                                                                     |       |      |          |          |           |
|---------|--------|-------------------------------------------------------------------------------------------------------------------------------------------------------------------------------------|-------|------|----------|----------|-----------|
| TYMSOS  | 494514 | chromosome 18 open reading frame 56 (C18orf56), mRNA.                                                                                                                               | -0.01 | 7.27 | 3.50E-01 | 3.95E-01 | turquoise |
| TYW3    | 127253 | tRNA-yW synthesizing protein 3 homolog ( <i>S. cerevisiae</i> ) (TYW3), mRNA.                                                                                                       | -0.06 | 7.60 | 3.68E-07 | 7.71E-07 | turquoise |
| U2AF2   | 11338  | U2 small nuclear RNA auxiliary factor 2 (U2AF2), transcript variant 2, mRNA.                                                                                                        | 0.04  | 7.02 | 1.80E-02 | 2.48E-02 | turquoise |
| UAP1L1  | 91373  | UDP-N-acetylglucosamine pyrophosphorylase 1-like 1 (UAP1L1), mRNA.                                                                                                                  | 0.59  | 8.03 | 5.07E-76 | 3.22E-74 | turquoise |
| UBASH3B | 84959  | Cbl-interacting protein Sts-1 (STS-1), mRNA.                                                                                                                                        | 0.56  | 9.27 | 7.42E-75 | 4.33E-73 | turquoise |
| UBE2E2  | 7325   | ubiquitin-conjugating enzyme E2E 2 (UBC4/5 homolog, yeast) (UBE2E2), mRNA.                                                                                                          | 0.11  | 7.42 | 5.15E-12 | 1.45E-11 | turquoise |
| UBE2G1  | 7326   | ubiquitin-conjugating enzyme E2G 1 (UBC7 homolog, yeast) (UBE2G1), mRNA.                                                                                                            | -0.07 | 6.66 | 7.47E-09 | 1.75E-08 | turquoise |
| UBE2Q2  | 92912  | ubiquitin-conjugating enzyme E2Q (putative) 2 (UBE2Q2), mRNA.                                                                                                                       | -0.11 | 9.32 | 2.20E-22 | 1.04E-21 | turquoise |
| UBE2S   | 731049 | PREDICTED: similar to Ubiquitin-conjugating enzyme E2S (Ubiquitin-conjugating enzyme E2-24 kDa) (Ubiquitin-protein ligase) (Ubiquitin carrier protein) (E2-EPF5) (LOC731049), mRNA. | 0.00  | 8.65 | 7.25E-01 | 7.57E-01 | turquoise |

|         |       |                                                                               |       |       |          |          |           |
|---------|-------|-------------------------------------------------------------------------------|-------|-------|----------|----------|-----------|
| UBL3    | 5412  | ubiquitin-like 3 (UBL3), mRNA.                                                | 0.00  | 9.48  | 8.14E-01 | 8.39E-01 | turquoise |
| UGCG    | 7357  | UDP-glucose ceramide glucosyltransferase (UGCG), mRNA.                        | 0.06  | 9.06  | 1.61E-05 | 3.02E-05 | turquoise |
| UGDH    | 7358  | UDP-glucose dehydrogenase (UGDH), mRNA.                                       | -0.07 | 8.15  | 1.36E-06 | 2.75E-06 | turquoise |
| UGT2B11 | 10720 | UDP glucuronosyltransferase 2 family, polypeptide B11 (UGT2B11), mRNA.        | 0.00  | 7.19  | 7.88E-01 | 8.15E-01 | turquoise |
| UGT2B17 | 7367  | UDP glucuronosyltransferase 2 family, polypeptide B17 (UGT2B17), mRNA.        | 0.04  | 6.59  | 9.30E-04 | 1.48E-03 | turquoise |
| UGT2B7  | 7364  | UDP glucuronosyltransferase 2 family, polypeptide B7 (UGT2B7), mRNA.          | 0.07  | 10.26 | 1.88E-03 | 2.90E-03 | turquoise |
| UNG     | 7374  | uracil-DNA glycosylase (UNG), transcript variant 2, mRNA.                     | -0.25 | 5.98  | 1.10E-22 | 5.34E-22 | turquoise |
| USP9X   | 8239  | ubiquitin specific peptidase 9, X-linked (USP9X), transcript variant 4, mRNA. | -0.66 | 6.19  | 3.22E-61 | 9.50E-60 | turquoise |
| UVRAG   | 7405  | UV radiation resistance associated gene (UVRAG), mRNA.                        | 0.04  | 7.07  | 5.03E-03 | 7.39E-03 | turquoise |
| VAMP5   | 10791 | vesicle-associated membrane protein 5 (myobrevin) (VAMP5), mRNA.              | 0.00  | 8.54  | 7.62E-01 | 7.92E-01 | turquoise |
| VASH2   | 79805 | vasohibin 2 (VASH2), mRNA.                                                    | -0.13 | 7.80  | 1.54E-17 | 5.85E-17 | turquoise |

|        |        |                                                                                          |       |       |          |          |           |
|--------|--------|------------------------------------------------------------------------------------------|-------|-------|----------|----------|-----------|
| VASP   | 7408   | vasodilator-stimulated phosphoprotein (VASP), transcript variant 2, mRNA.                | 0.06  | 6.64  | 1.15E-04 | 2.00E-04 | turquoise |
| VCL    | 7414   | vinculin (VCL), transcript variant 1, mRNA.                                              | 0.01  | 10.52 | 3.29E-01 | 3.73E-01 | turquoise |
| VIMP   | 55829  | selenoprotein S (SELS), transcript variant 2, mRNA.                                      | 0.01  | 7.43  | 1.77E-01 | 2.12E-01 | turquoise |
| VPS41  | 27072  | vacuolar protein sorting 41 homolog (S. cerevisiae) (VPS41), transcript variant 2, mRNA. | 0.05  | 6.82  | 1.72E-02 | 2.37E-02 | turquoise |
| VSTM2L | 128434 | chromosome 20 open reading frame 102 (C20orf102), mRNA.                                  | -0.07 | 8.15  | 1.37E-09 | 3.36E-09 | turquoise |
| WASL   | 8976   | Wiskott-Aldrich syndrome-like (WASL), mRNA.                                              | 0.44  | 7.29  | 4.06E-40 | 4.10E-39 | turquoise |
| WDR41  | 55255  | WD repeat domain 41 (WDR41), mRNA.                                                       | 0.02  | 7.41  | 7.76E-02 | 9.87E-02 | turquoise |
| WFS1   | 7466   | Wolfram syndrome 1 (wolframin) (WFS1), mRNA.                                             | -0.05 | 6.85  | 3.29E-03 | 4.93E-03 | turquoise |
| XPR1   | 9213   | xenotropic and polytropic retrovirus receptor (XPR1), mRNA.                              | 0.01  | 10.68 | 3.89E-01 | 4.34E-01 | turquoise |
| YBX3   | 8531   | cold shock domain protein A (CSDA), mRNA.                                                | 0.02  | 8.98  | 1.23E-01 | 1.52E-01 | turquoise |
| YPEL5  | 51646  | yippee-like 5 (Drosophila) (YPEL5), mRNA.                                                | -0.08 | 7.59  | 3.94E-11 | 1.05E-10 | turquoise |
| ZBED1  | 9189   | zinc finger, BED-type containing 1 (ZBED1), mRNA.                                        | 0.12  | 5.72  | 1.06E-16 | 3.86E-16 | turquoise |
| ZBED2  | 79413  | zinc finger, BED-type containing 2 (ZBED2), mRNA.                                        | -0.14 | 9.35  | 6.05E-20 | 2.58E-19 | turquoise |

|         |        |                                                                             |       |       |          |          |           |
|---------|--------|-----------------------------------------------------------------------------|-------|-------|----------|----------|-----------|
| ZBTB20  | 26137  | zinc finger and BTB domain containing 20 (ZBTB20), mRNA.                    | -0.15 | 9.31  | 2.13E-19 | 8.83E-19 | turquoise |
| ZCCHC7  | 84186  | zinc finger, CCHC domain containing 7 (ZCCHC7), mRNA.                       | -0.08 | 7.20  | 1.48E-04 | 2.54E-04 | turquoise |
| ZDHHC14 | 79683  | zinc finger, DHHC-type containing 14 (ZDHHC14), transcript variant 1, mRNA. | 0.21  | 7.00  | 4.70E-27 | 2.76E-26 | turquoise |
| ZFP36L1 | 677    | zinc finger protein 36, C3H type-like 1 (ZFP36L1), mRNA.                    | -0.17 | 6.79  | 5.97E-29 | 3.74E-28 | turquoise |
| ZFP91   | 80829  | zinc finger protein 91 homolog (mouse) (ZFP91), transcript variant 1, mRNA. | 0.35  | 9.41  | 3.77E-41 | 3.97E-40 | turquoise |
| ZFPM1   | 161882 | zinc finger protein, multitype 1 (ZFPM1), mRNA.                             | 1.17  | 8.53  | 3.03E-98 | 1.10E-95 | turquoise |
| ZMYM6NB | 9204   | zinc finger, MYM-type 6 (ZMYM6), mRNA.                                      | -0.46 | 6.95  | 1.93E-57 | 4.47E-56 | turquoise |
| ZNF143  | 7702   | zinc finger protein 143 (ZNF143), mRNA.                                     | -0.19 | 9.11  | 6.85E-30 | 4.42E-29 | turquoise |
| ZNF148  | 7707   | zinc finger protein 148 (ZNF148), mRNA.                                     | 0.23  | 8.20  | 2.31E-19 | 9.58E-19 | turquoise |
| ZNF281  | 23528  | zinc finger protein 281 (ZNF281), mRNA.                                     | -0.01 | 8.25  | 5.35E-01 | 5.80E-01 | turquoise |
| ZNF296  | 162979 | zinc finger protein 342 (ZNF342), mRNA.                                     | -0.10 | 8.60  | 3.00E-17 | 1.12E-16 | turquoise |
| ZNF318  | 24149  | zinc finger protein 318 (ZNF318), mRNA.                                     | -0.01 | 7.69  | 2.61E-01 | 3.03E-01 | turquoise |
| ZNF573  | 126231 | zinc finger protein 573 (ZNF573), mRNA.                                     | -0.30 | 10.65 | 5.20E-56 | 1.10E-54 | turquoise |
| ZNF827  | 152485 | hypothetical protein LOC152485 (LOC152485), mRNA.                           | -0.07 | 7.57  | 5.35E-07 | 1.11E-06 | turquoise |

|        |       |                                                                                                                                     |       |       |          |          |           |
|--------|-------|-------------------------------------------------------------------------------------------------------------------------------------|-------|-------|----------|----------|-----------|
| ZNF84  | 7637  | zinc finger protein 84 (ZNF84), mRNA.                                                                                               | 0.22  | 7.73  | 4.20E-27 | 2.48E-26 | turquoise |
| ZNFX1  | 57169 | zinc finger, NFX1-type containing 1 (ZNFX1), mRNA.                                                                                  | -0.04 | 9.74  | 1.57E-04 | 2.68E-04 | turquoise |
| ZRANB2 | 9406  | zinc finger, RAN-binding domain containing 2 (ZRANB2), transcript variant 1, mRNA.                                                  | -0.12 | 8.17  | 1.57E-13 | 4.80E-13 | turquoise |
| 6-Sep  | 23157 | septin 6 (SEPT6), transcript variant I, mRNA.                                                                                       | -0.35 | 7.68  | 1.20E-47 | 1.77E-46 | yellow    |
| ACAP1  | 9744  | centaurin, beta 1 (CENTB1), mRNA.                                                                                                   | -0.01 | 10.83 | 7.18E-01 | 7.51E-01 | yellow    |
| ACAT1  | 38    | acetyl-Coenzyme A acetyltransferase 1 (acetoacetyl Coenzyme A thiolase) (ACAT1), nuclear gene encoding mitochondrial protein, mRNA. | 0.01  | 7.40  | 4.43E-01 | 4.89E-01 | yellow    |
| ACIN1  | 22985 | apoptotic chromatin condensation inducer 1 (ACIN1), mRNA.                                                                           | -0.12 | 9.20  | 8.14E-15 | 2.67E-14 | yellow    |
| ACSS1  | 84532 | acyl-CoA synthetase short-chain family member 1 (ACSS1), nuclear gene encoding mitochondrial protein, mRNA.                         | -0.04 | 10.58 | 9.45E-04 | 1.50E-03 | yellow    |
| ACTN4  | 81    | actinin, alpha 4 (ACTN4), mRNA.                                                                                                     | -0.10 | 5.64  | 1.97E-07 | 4.22E-07 | yellow    |
| ADAP2  | 55803 | centaurin, alpha 2 (CENTA2), mRNA.                                                                                                  | -0.03 | 7.52  | 7.42E-03 | 1.07E-02 | yellow    |
| ADRM1  | 11047 | adhesion regulating molecule 1 (ADRM1), transcript variant 1, mRNA.                                                                 | 0.04  | 8.06  | 3.97E-03 | 5.90E-03 | yellow    |



|         |        |                                                                                                             |       |       |          |          |        |
|---------|--------|-------------------------------------------------------------------------------------------------------------|-------|-------|----------|----------|--------|
| AFG3L2  | 10939  | AFG3 ATPase family gene 3-like 2 (yeast) (AFG3L2), nuclear gene encoding mitochondrial protein, mRNA.       | -0.14 | 7.98  | 4.24E-21 | 1.90E-20 | yellow |
| AKNA    | 80709  | AT-hook transcription factor (AKNA), mRNA.                                                                  | 0.02  | 8.61  | 2.55E-02 | 3.46E-02 | yellow |
| ALDH2   | 217    | aldehyde dehydrogenase 2 family (mitochondrial) (ALDH2), nuclear gene encoding mitochondrial protein, mRNA. | -0.01 | 9.41  | 2.93E-01 | 3.37E-01 | yellow |
| ALDH3A2 | 224    | aldehyde dehydrogenase 3 family, member A2 (ALDH3A2), transcript variant 1, mRNA.                           | -0.26 | 6.69  | 1.26E-37 | 1.15E-36 | yellow |
| ALDH9A1 | 223    | aldehyde dehydrogenase 9 family, member A1 (ALDH9A1), mRNA.                                                 | -0.04 | 7.68  | 5.83E-03 | 8.50E-03 | yellow |
| ALDOC   | 230    | aldolase C, fructose-bisphosphate (ALDOC), mRNA.                                                            | -0.07 | 8.19  | 1.89E-03 | 2.91E-03 | yellow |
| ALG13   | 55849  | asparagine-linked glycosylation 13 homolog ( <i>S. cerevisiae</i> ) (ALG13), mRNA.                          | -0.05 | 7.03  | 5.55E-03 | 8.12E-03 | yellow |
| AMOT    | 154796 | angiomin (AMOT), mRNA.                                                                                      | 0.02  | 12.29 | 2.62E-01 | 3.04E-01 | yellow |
| ANAPC5  | 51433  | anaphase promoting complex subunit 5 (ANAPC5), mRNA.                                                        | -0.08 | 7.13  | 5.14E-08 | 1.14E-07 | yellow |
| AP2A1   | 160    | adaptor-related protein complex 2, alpha 1 subunit (AP2A1), transcript variant 1, mRNA.                     | 0.00  | 8.38  | 9.73E-01 | 9.77E-01 | yellow |

|          |       |                                                                                         |       |      |          |          |        |
|----------|-------|-----------------------------------------------------------------------------------------|-------|------|----------|----------|--------|
| AP3D1    | 8943  | adaptor-related protein complex 3, delta 1 subunit (AP3D1), transcript variant 2, mRNA. | 0.04  | 5.81 | 9.69E-03 | 1.38E-02 | yellow |
| APEH     | 327   | N-acylaminoacyl-peptide hydrolase (APEH), mRNA.                                         | -0.10 | 5.58 | 4.39E-09 | 1.05E-08 | yellow |
| APMAP    | 57136 | chromosome 20 open reading frame 3 (C20orf3), mRNA.                                     | 0.25  | 7.35 | 6.41E-30 | 4.14E-29 | yellow |
| APOBEC3C | 27350 | apolipoprotein B mRNA editing enzyme, catalytic polypeptide-like 3C (APOBEC3C), mRNA.   | -0.19 | 6.00 | 1.68E-28 | 1.04E-27 | yellow |
| ARHGDIA  | 396   | Rho GDP dissociation inhibitor (GDI) alpha (ARHGDIA), mRNA.                             | 0.08  | 7.05 | 7.79E-06 | 1.49E-05 | yellow |
| ATAD3A   | 55210 | ATPase family, AAA domain containing 3A (ATAD3A), mRNA.                                 | -0.10 | 8.82 | 3.08E-05 | 5.62E-05 | yellow |
| ATN1     | 1822  | atrophin 1 (ATN1), transcript variant 1, mRNA.                                          | 0.09  | 8.73 | 2.27E-05 | 4.19E-05 | yellow |
| ATP13A1  | 57130 | ATPase type 13A1 (ATP13A1), mRNA.                                                       | -0.02 | 7.55 | 2.49E-01 | 2.90E-01 | yellow |
| AXIN1    | 8312  | axin 1 (AXIN1), transcript variant 2, mRNA.                                             | 0.04  | 7.51 | 1.23E-02 | 1.74E-02 | yellow |
| B4GALT1  | 2683  | UDP-Gal:betaGlcNAc beta 1,4- galactosyltransferase, polypeptide 1 (B4GALT1), mRNA.      | -0.03 | 7.37 | 1.24E-02 | 1.74E-02 | yellow |
| BAX      | 581   | BCL2-associated X protein (BAX), transcript variant beta, mRNA.                         | 0.17  | 8.11 | 1.20E-22 | 5.78E-22 | yellow |

|          |       |                                                                                                             |       |       |          |          |        |
|----------|-------|-------------------------------------------------------------------------------------------------------------|-------|-------|----------|----------|--------|
| BBX      | 56987 | bobby sox homolog (Drosophila) (BBX), mRNA.                                                                 | 0.04  | 10.22 | 1.81E-04 | 3.08E-04 | yellow |
| BCL3     | 602   | B-cell CLL/lymphoma 3 (BCL3), mRNA.                                                                         | -0.29 | 7.14  | 1.77E-45 | 2.34E-44 | yellow |
| BIRC3    | 330   | baculoviral IAP repeat-containing 3 (BIRC3), transcript variant 1, mRNA.                                    | -0.13 | 8.89  | 8.25E-24 | 4.22E-23 | yellow |
| BLVRA    | 644   | biliverdin reductase A (BLVRA), mRNA.                                                                       | -0.14 | 6.27  | 2.91E-18 | 1.14E-17 | yellow |
| BNIP3    | 664   | BCL2/adenovirus E1B 19kDa interacting protein 3 (BNIP3), nuclear gene encoding mitochondrial protein, mRNA. | 0.07  | 7.61  | 1.30E-07 | 2.82E-07 | yellow |
| BSG      | 682   | basigin (Ok blood group) (BSG), transcript variant 2, mRNA.                                                 | -0.03 | 5.53  | 7.64E-02 | 9.72E-02 | yellow |
| C10orf76 | 79591 | chromosome 10 open reading frame 76 (C10orf76), mRNA.                                                       | 0.02  | 9.22  | 2.58E-01 | 3.00E-01 | yellow |
| C15orf57 | 90416 | coiled-coil domain containing 32 (CCDC32), transcript variant 1, mRNA.                                      | 0.07  | 8.07  | 1.08E-07 | 2.35E-07 | yellow |
| C17orf62 | 79415 | chromosome 17 open reading frame 62 (C17orf62), mRNA.                                                       | 0.06  | 6.51  | 6.18E-04 | 1.00E-03 | yellow |
| C2orf49  | 79074 | chromosome 2 open reading frame 49 (C2orf49), mRNA.                                                         | 0.10  | 11.00 | 3.35E-14 | 1.07E-13 | yellow |
| C7orf26  | 79034 | chromosome 7 open reading frame 26 (C7orf26), mRNA.                                                         | -0.08 | 6.92  | 1.47E-06 | 2.97E-06 | yellow |
| CABIN1   | 23523 | calcineurin binding protein 1 (CABIN1), mRNA.                                                               | 0.00  | 7.12  | 9.20E-01 | 9.32E-01 | yellow |

|          |        |                                                                                               |       |      |           |           |        |
|----------|--------|-----------------------------------------------------------------------------------------------|-------|------|-----------|-----------|--------|
| CAD      | 790    | carbamoyl-phosphate synthetase 2, aspartate transcarbamylase, and dihydroorotase (CAD), mRNA. | 0.00  | 9.16 | 8.24E-01  | 8.48E-01  | yellow |
| CALR     | 811    | calreticulin (CALR), mRNA.                                                                    | -0.06 | 8.18 | 1.36E-05  | 2.56E-05  | yellow |
| CANT1    | 124583 | calcium activated nucleotidase 1 (CANT1), mRNA.                                               | 0.33  | 8.68 | 4.86E-43  | 5.66E-42  | yellow |
| CARM1    | 10498  | coactivator-associated arginine methyltransferase 1 (CARM1), mRNA.                            | 0.04  | 6.92 | 1.53E-02  | 2.13E-02  | yellow |
| CCAR2    | 57805  | KIAA1967 (KIAA1967), transcript variant 1, mRNA.                                              | 0.01  | 7.51 | 6.00E-01  | 6.42E-01  | yellow |
| CD86     | 942    | CD86 molecule (CD86), transcript variant 2, mRNA.                                             | 2.16  | 7.20 | 2.75E-108 | 1.74E-105 | yellow |
| CDC25B   | 994    | cell division cycle 25 homolog B (S. pombe) (CDC25B), transcript variant 3, mRNA.             | -1.00 | 8.48 | 2.85E-88  | 4.67E-86  | yellow |
| CDCA8    | 55143  | cell division cycle associated 8 (CDCA8), mRNA.                                               | 0.12  | 8.38 | 1.81E-11  | 4.93E-11  | yellow |
| CDK5RAP3 | 80279  | CDK5 regulatory subunit associated protein 3 (CDK5RAP3), transcript variant 1, mRNA.          | 0.00  | 7.59 | 8.77E-01  | 8.96E-01  | yellow |
| CHERP    | 10523  | calcium homeostasis endoplasmic reticulum protein (CHERP), mRNA.                              | -0.01 | 9.70 | 3.92E-01  | 4.37E-01  | yellow |
| CHMP1A   | 5119   | procollagen (type III) N-endopeptidase (PCOLN3), mRNA.                                        | -0.08 | 7.20 | 1.95E-11  | 5.32E-11  | yellow |

|         |        |                                                                                                    |       |       |          |          |        |
|---------|--------|----------------------------------------------------------------------------------------------------|-------|-------|----------|----------|--------|
| CHPF    | 79586  | chondroitin polymerizing factor (CHPF), mRNA.                                                      | -0.05 | 9.57  | 2.50E-06 | 4.96E-06 | yellow |
| CHTF18  | 63922  | CTF18, chromosome transmission fidelity factor 18 homolog ( <i>S. cerevisiae</i> ) (CHTF18), mRNA. | 0.04  | 11.46 | 2.15E-03 | 3.28E-03 | yellow |
| CHURC1  | 91612  | churchill domain containing 1 (CHURC1), mRNA.                                                      | -0.07 | 7.33  | 4.16E-06 | 8.12E-06 | yellow |
| CIRBP   | 1153   | cold inducible RNA binding protein (CIRBP), mRNA.                                                  | -0.22 | 7.54  | 1.31E-29 | 8.35E-29 | yellow |
| CLPTM1  | 1209   | cleft lip and palate associated transmembrane protein 1 (CLPTM1), mRNA.                            | -0.32 | 6.12  | 2.68E-40 | 2.75E-39 | yellow |
| CLUH    | 23277  | KIAA0664 (KIAA0664), mRNA.                                                                         | -0.03 | 7.99  | 2.56E-02 | 3.47E-02 | yellow |
| CNEP1R1 | 255919 | chromosome 16 open reading frame 69 (C16orf69), mRNA.                                              | -0.85 | 7.45  | 2.62E-78 | 2.05E-76 | yellow |
| CNOT3   | 4849   | CCR4-NOT transcription complex, subunit 3 (CNOT3), mRNA.                                           | 0.27  | 7.50  | 4.41E-30 | 2.86E-29 | yellow |
| CNPPD1  | 27013  | chromosome 2 open reading frame 24 (C2orf24), mRNA.                                                | -0.01 | 7.53  | 3.28E-01 | 3.72E-01 | yellow |
| COL9A2  | 1298   | collagen, type IX, alpha 2 (COL9A2), mRNA.                                                         | 0.17  | 6.00  | 1.62E-21 | 7.43E-21 | yellow |
| COQ5    | 84274  | coenzyme Q5 homolog, methyltransferase ( <i>S. cerevisiae</i> ) (COQ5), mRNA.                      | 0.04  | 8.65  | 2.65E-02 | 3.58E-02 | yellow |
| CORO7   | 79585  | coronin 7 (CORO7), mRNA.                                                                           | 0.01  | 8.07  | 3.45E-01 | 3.90E-01 | yellow |

|         |       |                                                                                                        |       |       |          |          |        |
|---------|-------|--------------------------------------------------------------------------------------------------------|-------|-------|----------|----------|--------|
| COTL1   | 23406 | coactosin-like 1 (Dictyostelium) (COTL1), mRNA.                                                        | -0.02 | 10.30 | 1.88E-01 | 2.24E-01 | yellow |
| CSRP1   | 1465  | cysteine and glycine-rich protein 1 (CSRP1), mRNA.                                                     | 0.00  | 8.79  | 8.66E-01 | 8.87E-01 | yellow |
| CTDNEP1 | 23399 | dullard homolog (Xenopus laevis) (DULLARD), mRNA.                                                      | -0.16 | 11.17 | 1.96E-22 | 9.32E-22 | yellow |
| CYB5R2  | 51700 | cytochrome b5 reductase 2 (CYB5R2), mRNA.                                                              | -0.05 | 10.67 | 4.25E-05 | 7.64E-05 | yellow |
| DDX24   | 57062 | DEAD (Asp-Glu-Ala-Asp) box polypeptide 24 (DDX24), mRNA.                                               | -0.11 | 8.12  | 1.82E-14 | 5.85E-14 | yellow |
| DDX56   | 54606 | DEAD (Asp-Glu-Ala-Asp) box polypeptide 56 (DDX56), mRNA.                                               | 0.19  | 8.29  | 2.74E-25 | 1.51E-24 | yellow |
| DECR1   | 1666  | 2,4-dienoyl CoA reductase 1, mitochondrial (DECR1), nuclear gene encoding mitochondrial protein, mRNA. | -0.12 | 7.68  | 1.94E-08 | 4.43E-08 | yellow |
| DEF8    | 54849 | hypothetical protein FLJ20186 (FLJ20186), transcript variant 1, mRNA.                                  | -0.03 | 7.83  | 1.48E-02 | 2.06E-02 | yellow |
| DHX30   | 22907 | DEAH (Asp-Glu-Ala-His) box polypeptide 30 (DHX30), transcript variant 2, mRNA.                         | 0.02  | 5.38  | 3.18E-01 | 3.62E-01 | yellow |
| DHX32   | 55760 | DEAH (Asp-Glu-Ala-His) box polypeptide 32 (DHX32), mRNA.                                               | -0.12 | 7.45  | 3.24E-10 | 8.24E-10 | yellow |
| DHX38   | 9785  | DEAH (Asp-Glu-Ala-His) box polypeptide 38 (DHX38), mRNA.                                               | 0.09  | 6.80  | 1.11E-05 | 2.11E-05 | yellow |

|        |       |                                                                                                         |       |      |          |          |        |
|--------|-------|---------------------------------------------------------------------------------------------------------|-------|------|----------|----------|--------|
| DLGAP4 | 22839 | discs, large (Drosophila) homolog-associated protein 4 (DLGAP4), transcript variant 3, mRNA.            | -0.08 | 8.07 | 1.52E-03 | 2.36E-03 | yellow |
| DNM2   | 1785  | dynamin 2 (DNM2), transcript variant 2, mRNA.                                                           | 0.44  | 8.26 | 8.70E-59 | 2.26E-57 | yellow |
| DPH5   | 51611 | DPH5 homolog (S. cerevisiae) (DPH5), transcript variant 2, mRNA.                                        | -0.03 | 8.27 | 2.41E-02 | 3.28E-02 | yellow |
| DPP9   | 91039 | dipeptidyl-peptidase 9 (DPP9), mRNA.                                                                    | 0.19  | 7.32 | 2.32E-31 | 1.59E-30 | yellow |
| ECI2   | 10455 | peroxisomal D3,D2-enoyl-CoA isomerase (PECI), transcript variant 2, mRNA.                               | -0.04 | 6.05 | 5.23E-03 | 7.67E-03 | yellow |
| EFTUD2 | 9343  | elongation factor Tu GTP binding domain containing 2 (EFTUD2), mRNA.                                    | -0.07 | 7.16 | 3.56E-05 | 6.45E-05 | yellow |
| EIF1B  | 10289 | eukaryotic translation initiation factor 1B (EIF1B), mRNA.                                              | 0.21  | 7.86 | 2.25E-25 | 1.24E-24 | yellow |
| EIF2S3 | 1968  | eukaryotic translation initiation factor 2, subunit 3 gamma, 52kDa (EIF2S3), mRNA.                      | 0.25  | 6.70 | 1.59E-40 | 1.64E-39 | yellow |
| EIF3B  | 8662  | eukaryotic translation initiation factor 3, subunit 9 eta, 116kDa (EIF3S9), transcript variant 1, mRNA. | -0.09 | 7.70 | 9.85E-10 | 2.43E-09 | yellow |
| EIF3D  | 8664  | eukaryotic translation initiation factor 3, subunit 7 zeta, 66/67kDa (EIF3S7), mRNA.                    | -0.07 | 6.87 | 4.54E-05 | 8.13E-05 | yellow |

|        |        |                                                                                           |       |       |          |          |        |
|--------|--------|-------------------------------------------------------------------------------------------|-------|-------|----------|----------|--------|
| EIF4G1 | 1981   | eukaryotic translation initiation factor 4 gamma, 1 (EIF4G1), transcript variant 5, mRNA. | 0.03  | 11.21 | 1.70E-02 | 2.35E-02 | yellow |
| ELAC2  | 60528  | elaC homolog 2 (E. coli) (ELAC2), mRNA.                                                   | 0.09  | 8.11  | 4.83E-09 | 1.15E-08 | yellow |
| EMID1  | 129080 | EMI domain containing 1 (EMID1), mRNA.                                                    | 0.06  | 7.25  | 3.38E-04 | 5.62E-04 | yellow |
| ENG    | 2022   | endoglin (Osler-Rendu-Weber syndrome 1) (ENG), mRNA.                                      | -0.04 | 6.35  | 4.66E-03 | 6.87E-03 | yellow |
| ENOPH1 | 58478  | enolase-phosphatase 1 (ENOPH1), mRNA.                                                     | 0.12  | 7.15  | 7.71E-11 | 2.04E-10 | yellow |
| EP300  | 2033   | E1A binding protein p300 (EP300), mRNA.                                                   | -0.05 | 8.21  | 1.35E-04 | 2.33E-04 | yellow |
| EP400  | 57634  | E1A binding protein p400 (EP400), mRNA.                                                   | 0.25  | 10.63 | 2.05E-31 | 1.41E-30 | yellow |
| ERAL1  | 26284  | Era G-protein-like 1 (E. coli) (ERAL1), mRNA.                                             | 0.07  | 7.42  | 6.78E-09 | 1.60E-08 | yellow |
| ESRRA  | 2101   | estrogen-related receptor alpha (ESRRA), mRNA.                                            | -0.03 | 5.89  | 4.50E-02 | 5.91E-02 | yellow |
| ESYT1  | 23344  | family with sequence similarity 62 (C2 domain containing), member A (FAM62A), mRNA.       | -0.05 | 8.25  | 5.30E-03 | 7.77E-03 | yellow |
| EXOSC3 | 51010  | exosome component 3 (EXOSC3), transcript variant 2, mRNA.                                 | 0.11  | 6.42  | 1.58E-11 | 4.33E-11 | yellow |
| FAM26F | 441168 | hypothetical protein LOC441168 (LOC441168), mRNA.                                         | -0.55 | 8.02  | 6.11E-58 | 1.46E-56 | yellow |



|        |       |                                                                                                                    |       |       |          |          |        |
|--------|-------|--------------------------------------------------------------------------------------------------------------------|-------|-------|----------|----------|--------|
| FBXW4  | 6468  | F-box and WD repeat domain containing 4 (FBXW4), mRNA.                                                             | -0.18 | 9.88  | 1.69E-33 | 1.26E-32 | yellow |
| FERMT3 | 83706 | UNC-112 related protein 2 (URP2), transcript variant URP2LF, mRNA.                                                 | 0.01  | 9.23  | 3.03E-01 | 3.47E-01 | yellow |
| FHOD1  | 29109 | formin homology 2 domain containing 1 (FHOD1), mRNA.                                                               | 1.04  | 9.22  | 2.05E-90 | 4.52E-88 | yellow |
| FLNA   | 2316  | filamin A, alpha (actin binding protein 280) (FLNA), mRNA.                                                         | -0.11 | 7.51  | 1.41E-20 | 6.19E-20 | yellow |
| FTH1   | 2495  | ferritin, heavy polypeptide 1 (FTH1), mRNA.                                                                        | -0.27 | 6.71  | 1.11E-22 | 5.39E-22 | yellow |
| G6PD   | 2539  | glucose-6-phosphate dehydrogenase (G6PD), nuclear gene encoding mitochondrial protein, transcript variant 2, mRNA. | -0.12 | 7.16  | 1.57E-15 | 5.34E-15 | yellow |
| GAD1   | 2571  | glutamate decarboxylase 1 (brain, 67kDa) (GAD1), transcript variant GAD25, mRNA.                                   | 0.59  | 7.89  | 3.73E-48 | 5.58E-47 | yellow |
| GBF1   | 8729  | golgi-specific brefeldin A resistance factor 1 (GBF1), mRNA.                                                       | 0.04  | 10.77 | 6.48E-03 | 9.43E-03 | yellow |
| GCNT1  | 2650  | glucosaminyl (N-acetyl) transferase 1, core 2 (beta-1,6-N-acetylglucosaminyltransferase) (GCNT1), mRNA.            | -0.55 | 6.15  | 2.41E-39 | 2.35E-38 | yellow |
| GDPD5  | 81544 | glycerophosphodiester phosphodiesterase domain containing 5 (GDPD5), mRNA.                                         | -0.09 | 10.38 | 6.48E-14 | 2.03E-13 | yellow |

|        |        |                                                                                                                                    |       |       |          |          |        |
|--------|--------|------------------------------------------------------------------------------------------------------------------------------------|-------|-------|----------|----------|--------|
| GLA    | 2717   | galactosidase, alpha (GLA), mRNA.                                                                                                  | 0.03  | 10.49 | 1.32E-02 | 1.85E-02 | yellow |
| GLIPR1 | 11010  | GLI pathogenesis-related 1 (glioma) (GLIPR1), mRNA.                                                                                | -0.03 | 9.83  | 2.02E-02 | 2.76E-02 | yellow |
| GLRX5  | 51218  | glutaredoxin 5 homolog (S. cerevisiae) (GLRX5), mRNA.                                                                              | 0.01  | 12.58 | 3.54E-01 | 3.99E-01 | yellow |
| GLT8D1 | 55830  | glycosyltransferase 8 domain containing 1 (GLT8D1), transcript variant 1, mRNA.                                                    | 0.08  | 7.88  | 2.75E-10 | 7.03E-10 | yellow |
| GMIP   | 51291  | GEM interacting protein (GMIP), mRNA.                                                                                              | 0.85  | 6.23  | 2.93E-74 | 1.67E-72 | yellow |
| GNAI2  | 2771   | guanine nucleotide binding protein (G protein), alpha inhibiting activity polypeptide 2 (GNAI2), mRNA.                             | 0.04  | 6.64  | 5.31E-02 | 6.90E-02 | yellow |
| GOLGA3 | 2802   | golgi autoantigen, golgin subfamily a, 3 (GOLGA3), mRNA.                                                                           | -0.08 | 9.55  | 4.98E-06 | 9.67E-06 | yellow |
| GRINA  | 2907   | glutamate receptor, ionotropic, N-methyl D-aspartate-associated protein 1 (glutamate binding) (GRINA), transcript variant 1, mRNA. | -0.01 | 6.95  | 3.58E-01 | 4.04E-01 | yellow |
| GRSF1  | 2926   | G-rich RNA sequence binding factor 1 (GRSF1), mRNA.                                                                                | -0.01 | 7.81  | 6.44E-01 | 6.83E-01 | yellow |
| H2AFX  | 729063 | PREDICTED: similar to H2A histone family, member X (LOC729063), mRNA.                                                              | 0.03  | 9.13  | 1.58E-01 | 1.91E-01 | yellow |
| HACL1  | 26061  | 2-hydroxyacyl-CoA lyase 1 (HACL1), mRNA.                                                                                           | 0.07  | 11.44 | 5.76E-08 | 1.28E-07 | yellow |

|          |       |                                                                                 |       |       |           |           |        |
|----------|-------|---------------------------------------------------------------------------------|-------|-------|-----------|-----------|--------|
| HELZ     | 9931  | helicase with zinc finger (HELZ), mRNA.                                         | 0.06  | 7.75  | 7.15E-03  | 1.04E-02  | yellow |
| HIGD1A   | 25994 | HIG1 domain family, member 1A (HIGD1A), mRNA.                                   | -0.20 | 9.26  | 8.94E-30  | 5.75E-29  | yellow |
| HJURP    | 55355 | hypothetical protein DKFZp762E1312 (DKFZp762E1312), mRNA.                       | -0.09 | 9.30  | 5.07E-13  | 1.51E-12  | yellow |
| HMGN5    | 79366 | nucleosomal binding protein 1 (NSBP1), mRNA.                                    | 0.06  | 8.24  | 5.53E-04  | 9.02E-04  | yellow |
| HN1      | 51155 | hematological and neurological expressed 1 (HN1), transcript variant 3, mRNA.   | 1.03  | 7.98  | 6.80E-96  | 2.30E-93  | yellow |
| HSP90AB1 | 3326  | heat shock protein 90kDa alpha (cytosolic), class B member 1 (HSP90AB1), mRNA.  | -0.17 | 7.70  | 7.08E-31  | 4.72E-30  | yellow |
| ING1     | 3621  | inhibitor of growth family, member 1 (ING1), transcript variant 2, mRNA.        | 0.00  | 10.78 | 7.38E-01  | 7.69E-01  | yellow |
| INTS3    | 65123 | integrator complex subunit 3 (INTS3), mRNA.                                     | -0.04 | 7.66  | 1.90E-03  | 2.93E-03  | yellow |
| INTS5    | 80789 | integrator complex subunit 5 (INTS5), mRNA.                                     | -0.01 | 5.64  | 3.66E-01  | 4.12E-01  | yellow |
| IPO13    | 9670  | importin 13 (IPO13), mRNA.                                                      | 1.70  | 7.18  | 3.90E-114 | 4.95E-111 | yellow |
| IPO4     | 79711 | importin 4 (IPO4), mRNA.                                                        | -0.03 | 6.55  | 3.53E-02  | 4.69E-02  | yellow |
| IQSEC1   | 9922  | IQ motif and Sec7 domain 1 (IQSEC1), mRNA.                                      | 0.01  | 7.81  | 7.13E-01  | 7.47E-01  | yellow |
| IRAK1    | 3654  | interleukin-1 receptor-associated kinase 1 (IRAK1), transcript variant 2, mRNA. | -0.07 | 6.98  | 2.99E-05  | 5.47E-05  | yellow |

|          |        |                                                                                                   |       |       |          |          |        |
|----------|--------|---------------------------------------------------------------------------------------------------|-------|-------|----------|----------|--------|
| IRF3     | 3661   | interferon regulatory factor 3 (IRF3), mRNA.                                                      | -0.04 | 7.18  | 1.12E-02 | 1.59E-02 | yellow |
| ISOC2    | 79763  | isochorismatase domain containing 2 (ISOC2), mRNA.                                                | 0.03  | 8.32  | 1.98E-02 | 2.72E-02 | yellow |
| ITFG2    | 55846  | integrin alpha FG-GAP repeat containing 2 (ITFG2), mRNA.                                          | 0.13  | 9.38  | 3.66E-14 | 1.16E-13 | yellow |
| ITFG3    | 83986  | integrin alpha FG-GAP repeat containing 3 (ITFG3), mRNA.                                          | 0.00  | 7.69  | 7.81E-01 | 8.10E-01 | yellow |
| KANK2    | 25959  | ankyrin repeat domain 25 (ANKRD25), mRNA.                                                         | -0.08 | 5.92  | 4.89E-06 | 9.51E-06 | yellow |
| KANSL1   | 284058 | KIAA1267 (KIAA1267), mRNA.                                                                        | 0.16  | 7.25  | 1.71E-26 | 9.83E-26 | yellow |
| KAT2B    | 8850   | p300/CBP-associated factor (PCAF), mRNA.                                                          | -0.12 | 8.70  | 8.35E-13 | 2.46E-12 | yellow |
| KCTD20   | 222658 | potassium channel tetramerisation domain containing 20 (KCTD20), mRNA.                            | 0.01  | 9.02  | 5.56E-01 | 6.00E-01 | yellow |
| KIAA0100 | 9703   | KIAA0100 (KIAA0100), mRNA.                                                                        | -0.05 | 8.79  | 2.93E-05 | 5.37E-05 | yellow |
| KIAA2013 | 90231  | KIAA2013 (KIAA2013), mRNA.                                                                        | 0.01  | 9.49  | 5.57E-01 | 6.00E-01 | yellow |
| KIF21A   | 55605  | kinesin family member 21A (KIF21A), mRNA.                                                         | -0.34 | 8.79  | 5.66E-24 | 2.92E-23 | yellow |
| KIF4A    | 24137  | kinesin family member 4A (KIF4A), mRNA.                                                           | 0.01  | 8.09  | 4.38E-01 | 4.84E-01 | yellow |
| LACTB    | 114294 | lactamase, beta (LACTB), nuclear gene encoding mitochondrial protein, transcript variant 1, mRNA. | -0.10 | 11.28 | 2.60E-13 | 7.88E-13 | yellow |

|        |       |                                                                                                |       |      |          |          |        |
|--------|-------|------------------------------------------------------------------------------------------------|-------|------|----------|----------|--------|
| LARP4B | 23185 | La ribonucleoprotein domain family, member 5 (LARP5), mRNA.                                    | 0.05  | 8.66 | 1.24E-02 | 1.75E-02 | yellow |
| LGALS9 | 3965  | lectin, galactoside-binding, soluble, 9 (galectin 9) (LGALS9), transcript variant short, mRNA. | 0.10  | 6.48 | 1.07E-09 | 2.63E-09 | yellow |
| LIG1   | 3978  | ligase I, DNA, ATP-dependent (LIG1), mRNA.                                                     | 0.12  | 6.77 | 3.02E-12 | 8.61E-12 | yellow |
| LMF2   | 91289 | transmembrane protein 112B (TMEM112B), mRNA.                                                   | 0.09  | 7.51 | 1.53E-09 | 3.75E-09 | yellow |
| LONP1  | 9361  | lon peptidase 1, mitochondrial (LONP1), nuclear gene encoding mitochondrial protein, mRNA.     | -0.04 | 6.92 | 1.18E-02 | 1.67E-02 | yellow |
| LSS    | 4047  | lanosterol synthase (2,3-oxidosqualene-lanosterol cyclase) (LSS), transcript variant 1, mRNA.  | 0.10  | 8.23 | 7.43E-10 | 1.85E-09 | yellow |
| LYRM1  | 57149 | LYR motif containing 1 (LYRM1), mRNA.                                                          | -0.04 | 9.15 | 5.06E-04 | 8.27E-04 | yellow |
| MAN2C1 | 4123  | mannosidase, alpha, class 2C, member 1 (MAN2C1), mRNA.                                         | 0.09  | 7.91 | 4.10E-09 | 9.80E-09 | yellow |
| MAP1S  | 55201 | microtubule-associated protein 1S (MAP1S), mRNA.                                               | 0.02  | 9.40 | 3.56E-01 | 4.02E-01 | yellow |
| MAP3K5 | 4217  | mitogen-activated protein kinase kinase kinase 5 (MAP3K5), mRNA.                               | -0.09 | 7.49 | 2.93E-07 | 6.17E-07 | yellow |

|        |       |                                                                                                         |       |       |          |          |        |
|--------|-------|---------------------------------------------------------------------------------------------------------|-------|-------|----------|----------|--------|
| MBTPS1 | 8720  | membrane-bound transcription factor peptidase, site 1 (MBTPS1), transcript variant 1, mRNA.             | 1.08  | 8.63  | 4.76E-92 | 1.15E-89 | yellow |
| MCM2   | 4171  | MCM2 minichromosome maintenance deficient 2, mitotin ( <i>S. cerevisiae</i> ) (MCM2), mRNA.             | 0.20  | 8.41  | 6.77E-24 | 3.48E-23 | yellow |
| MDH2   | 4191  | malate dehydrogenase 2, NAD (mitochondrial) (MDH2), mRNA.                                               | -0.13 | 8.99  | 1.42E-16 | 5.14E-16 | yellow |
| MED24  | 9862  | thyroid hormone receptor associated protein 4 (THRAP4), transcript variant 2, mRNA.                     | 0.08  | 9.35  | 7.43E-11 | 1.96E-10 | yellow |
| MED25  | 81857 | mediator of RNA polymerase II transcription, subunit 25 homolog ( <i>S. cerevisiae</i> ) (MED25), mRNA. | 0.00  | 8.66  | 8.64E-01 | 8.85E-01 | yellow |
| MED28  | 80306 | mediator of RNA polymerase II transcription, subunit 28 homolog ( <i>S. cerevisiae</i> ) (MED28), mRNA. | 0.06  | 11.17 | 5.54E-04 | 9.03E-04 | yellow |
| MESDC1 | 59274 | mesoderm development candidate 1 (MESDC1), mRNA.                                                        | 0.02  | 10.91 | 1.06E-01 | 1.32E-01 | yellow |
| MFHAS1 | 9258  | malignant fibrous histiocytoma amplified sequence 1 (MFHAS1), mRNA.                                     | -0.05 | 10.76 | 1.93E-04 | 3.27E-04 | yellow |

|       |        |                                                                                                |       |       |          |          |        |
|-------|--------|------------------------------------------------------------------------------------------------|-------|-------|----------|----------|--------|
| MGAT1 | 4245   | mannosyl (alpha-1,3-)-glycoprotein beta-1,2-N-acetylglucosaminyltransferase (MGAT1), mRNA.     | -0.04 | 8.68  | 6.17E-03 | 8.99E-03 | yellow |
| MGLL  | 11343  | monoglyceride lipase (MGLL), transcript variant 2, mRNA.                                       | 0.32  | 8.09  | 4.51E-57 | 1.02E-55 | yellow |
| MITD1 | 129531 | MIT, microtubule interacting and transport, domain containing 1 (MITD1), mRNA.                 | -0.23 | 8.99  | 2.76E-27 | 1.64E-26 | yellow |
| MKNK2 | 2872   | MAP kinase interacting serine/threonine kinase 2 (MKNK2), transcript variant 2, mRNA.          | 0.90  | 8.48  | 7.41E-74 | 4.04E-72 | yellow |
| MLF2  | 8079   | myeloid leukemia factor 2 (MLF2), mRNA.                                                        | -0.21 | 6.39  | 2.18E-32 | 1.58E-31 | yellow |
| MOV10 | 4343   | Mov10, Moloney leukemia virus 10, homolog (mouse) (MOV10), mRNA.                               | 0.09  | 8.20  | 2.14E-07 | 4.57E-07 | yellow |
| MPRIP | 23164  | myosin phosphatase-Rho interacting protein (M-RIP), transcript variant 1, mRNA.                | -0.03 | 8.74  | 4.58E-02 | 6.00E-02 | yellow |
| MRPL1 | 65008  | mitochondrial ribosomal protein L1 (MRPL1), nuclear gene encoding mitochondrial protein, mRNA. | 0.00  | 11.10 | 9.35E-01 | 9.45E-01 | yellow |
| MRPL2 | 51069  | mitochondrial ribosomal protein L2 (MRPL2), nuclear gene encoding mitochondrial protein, mRNA. | 0.05  | 8.26  | 7.86E-03 | 1.13E-02 | yellow |

|        |       |                                                                                                                                                         |       |      |          |          |        |
|--------|-------|---------------------------------------------------------------------------------------------------------------------------------------------------------|-------|------|----------|----------|--------|
| MRPL32 | 64983 | mitochondrial ribosomal protein L32 (MRPL32), nuclear gene encoding mitochondrial protein, mRNA.                                                        | -0.07 | 6.37 | 5.25E-04 | 8.58E-04 | yellow |
| MRPL38 | 64978 | mitochondrial ribosomal protein L38 (MRPL38), nuclear gene encoding mitochondrial protein, mRNA.                                                        | -0.09 | 9.21 | 1.02E-08 | 2.37E-08 | yellow |
| MRPL43 | 84545 | mitochondrial ribosomal protein L43 (MRPL43), nuclear gene encoding mitochondrial protein, transcript variant 4, mRNA.                                  | -0.22 | 6.15 | 8.03E-26 | 4.50E-25 | yellow |
| MSN    | 4478  | moesin (MSN), mRNA.                                                                                                                                     | 0.33  | 9.56 | 1.23E-51 | 2.06E-50 | yellow |
| MTA1   | 9112  | metastasis associated 1 (MTA1), mRNA.                                                                                                                   | -0.24 | 6.51 | 3.16E-32 | 2.27E-31 | yellow |
| MTA2   | 9219  | metastasis associated 1 family, member 2 (MTA2), mRNA.                                                                                                  | -0.03 | 7.35 | 4.14E-02 | 5.45E-02 | yellow |
| MTF1   | 4520  | metal-regulatory transcription factor 1 (MTF1), mRNA.                                                                                                   | 0.05  | 8.06 | 8.76E-03 | 1.26E-02 | yellow |
| MTHFD1 | 4522  | methylenetetrahydrofolate dehydrogenase (NADP+ dependent) 1, methenyltetrahydrofolate cyclohydrolase, formyltetrahydrofolate synthetase (MTHFD1), mRNA. | -0.02 | 8.02 | 1.49E-01 | 1.81E-01 | yellow |



|         |       |                                                                                                                                                                                         |       |      |          |          |        |
|---------|-------|-----------------------------------------------------------------------------------------------------------------------------------------------------------------------------------------|-------|------|----------|----------|--------|
| MTHFD2  | 10797 | methylenetetrahydrofolate dehydrogenase (NADP+ dependent) 2, methenyltetrahydrofolate cyclohydrolase (MTHFD2), nuclear gene encoding mitochondrial protein, transcript variant 1, mRNA. | 0.16  | 8.72 | 1.33E-29 | 8.50E-29 | yellow |
| MTOR    | 2475  | FK506 binding protein 12-rapamycin associated protein 1 (FRAP1), mRNA.                                                                                                                  | 0.03  | 7.22 | 1.89E-02 | 2.60E-02 | yellow |
| MYO1C   | 4641  | myosin IC (MYO1C), transcript variant 2, mRNA.                                                                                                                                          | 0.00  | 9.00 | 8.78E-01 | 8.97E-01 | yellow |
| MYO1G   | 64005 | myosin IG (MYO1G), mRNA.                                                                                                                                                                | -0.18 | 7.52 | 1.30E-17 | 4.98E-17 | yellow |
| N4BP2L2 | 10443 | phosphonoformate immuno-associated protein 5 (PFAAP5), mRNA.                                                                                                                            | 0.01  | 9.84 | 3.79E-01 | 4.24E-01 | yellow |
| NA      | 7919  | HLA-B associated transcript 1 (BAT1), transcript variant 1, mRNA.                                                                                                                       | 0.15  | 6.48 | 4.85E-21 | 2.16E-20 | yellow |
| NA      | 51523 | CXXC finger 5 (CXXC5), mRNA.                                                                                                                                                            | -0.05 | 9.66 | 1.62E-04 | 2.76E-04 | yellow |
| NA      | 8106  | poly(A) binding protein, nuclear 1 (PABPN1), mRNA.                                                                                                                                      | -0.05 | 7.18 | 3.42E-03 | 5.11E-03 | yellow |

|         |       |                                                                                                                                                                           |       |       |          |          |        |
|---------|-------|---------------------------------------------------------------------------------------------------------------------------------------------------------------------------|-------|-------|----------|----------|--------|
| NA      | 2073  | excision repair cross-complementing rodent repair deficiency, complementation group 5 (xeroderma pigmentosum, complementation group G (Cockayne syndrome)) (ERCC5), mRNA. | 0.01  | 10.61 | 3.32E-01 | 3.77E-01 | yellow |
| NABP2   | 79035 | oligonucleotide/oligosaccharide-binding fold containing 2B (OBFC2B), mRNA.                                                                                                | 0.12  | 5.61  | 8.38E-13 | 2.47E-12 | yellow |
| NADSYN1 | 55191 | NAD synthetase 1 (NADSYN1), mRNA.                                                                                                                                         | 0.03  | 6.91  | 8.11E-02 | 1.03E-01 | yellow |
| NCAPD3  | 23310 | non-SMC condensin II complex, subunit D3 (NCAPD3), mRNA.                                                                                                                  | 0.14  | 8.02  | 1.46E-22 | 7.00E-22 | yellow |
| NCOA5   | 57727 | nuclear receptor coactivator 5 (NCOA5), mRNA.                                                                                                                             | -0.04 | 6.75  | 2.35E-02 | 3.20E-02 | yellow |
| NCOR2   | 9612  | nuclear receptor co-repressor 2 (NCOR2), transcript variant 2, mRNA.                                                                                                      | 0.14  | 5.86  | 3.47E-15 | 1.16E-14 | yellow |
| NDFIP2  | 54602 | Nedd4 family interacting protein 2 (NDFIP2), mRNA.                                                                                                                        | -0.16 | 7.93  | 4.59E-27 | 2.70E-26 | yellow |
| NDRG3   | 57446 | NDRG family member 3 (NDRG3), transcript variant 1, mRNA.                                                                                                                 | 0.07  | 6.81  | 2.73E-05 | 5.01E-05 | yellow |

|        |       |                                                                                                                           |       |      |          |          |        |
|--------|-------|---------------------------------------------------------------------------------------------------------------------------|-------|------|----------|----------|--------|
| NDUFA6 | 4700  | NADH dehydrogenase (ubiquinone) 1 alpha subcomplex, 6, 14kDa (NDUFA6), nuclear gene encoding mitochondrial protein, mRNA. | 0.27  | 8.77 | 2.05E-45 | 2.70E-44 | yellow |
| NDUFB5 | 4711  | NADH dehydrogenase (ubiquinone) 1 beta subcomplex, 5, 16kDa (NDUFB5), nuclear gene encoding mitochondrial protein, mRNA.  | 0.01  | 6.10 | 6.74E-01 | 7.10E-01 | yellow |
| NELFB  | 25920 | PREDICTED: cofactor of BRCA1 (COBRA1), mRNA.                                                                              | -0.06 | 7.21 | 8.89E-05 | 1.56E-04 | yellow |
| NMT2   | 9397  | N-myristoyltransferase 2 (NMT2), mRNA.                                                                                    | 0.98  | 6.28 | 1.25E-60 | 3.56E-59 | yellow |
| NOC2L  | 26155 | nucleolar complex associated 2 homolog (S. cerevisiae) (NOC2L), mRNA.                                                     | 0.10  | 6.45 | 1.96E-09 | 4.75E-09 | yellow |
| NPC2   | 10577 | Niemann-Pick disease, type C2 (NPC2), mRNA.                                                                               | 0.09  | 6.13 | 2.16E-09 | 5.23E-09 | yellow |
| NPLOC4 | 55666 | nuclear protein localization 4 homolog (S. cerevisiae) (NPLOC4), mRNA.                                                    | 0.01  | 9.13 | 6.77E-01 | 7.13E-01 | yellow |
| NQO1   | 1728  | NAD(P)H dehydrogenase, quinone 1 (NQO1), transcript variant 2, mRNA.                                                      | -0.12 | 8.91 | 1.41E-08 | 3.25E-08 | yellow |
| NRBP1  | 29959 | nuclear receptor binding protein 1 (NRBP1), mRNA.                                                                         | 0.23  | 9.05 | 5.20E-35 | 4.15E-34 | yellow |

|        |        |                                                                                                                                               |       |       |          |          |        |
|--------|--------|-----------------------------------------------------------------------------------------------------------------------------------------------|-------|-------|----------|----------|--------|
| NRROS  | 375387 | leucine rich repeat containing 33 (LRRC33), mRNA.                                                                                             | 0.05  | 7.04  | 2.22E-04 | 3.76E-04 | yellow |
| NT5DC2 | 64943  | 5'-nucleotidase domain containing 2 (NT5DC2), mRNA.                                                                                           | -0.11 | 7.74  | 1.21E-11 | 3.33E-11 | yellow |
| NUP188 | 23511  | nucleoporin 188kDa (NUP188), mRNA.                                                                                                            | -0.07 | 9.77  | 9.23E-10 | 2.28E-09 | yellow |
| NUP210 | 23225  | nucleoporin 210kDa (NUP210), mRNA.                                                                                                            | 0.02  | 8.75  | 1.37E-01 | 1.67E-01 | yellow |
| NUP214 | 8021   | nucleoporin 214kDa (NUP214), mRNA.                                                                                                            | 0.26  | 8.84  | 4.12E-40 | 4.16E-39 | yellow |
| NUP37  | 79023  | nucleoporin 37kDa (NUP37), mRNA.                                                                                                              | 0.05  | 10.62 | 2.91E-02 | 3.90E-02 | yellow |
| NUP93  | 9688   | nucleoporin 93kDa (NUP93), mRNA.                                                                                                              | 0.39  | 7.37  | 1.07E-55 | 2.21E-54 | yellow |
| NXF1   | 10482  | nuclear RNA export factor 1 (NXF1), transcript variant 2, mRNA.                                                                               | -0.09 | 8.70  | 1.79E-12 | 5.16E-12 | yellow |
| OGDH   | 4967   | oxoglutarate (alpha-ketoglutarate) dehydrogenase (lipoamide) (OGDH), nuclear gene encoding mitochondrial protein, transcript variant 1, mRNA. | -0.07 | 8.51  | 5.92E-06 | 1.14E-05 | yellow |
| PA2G4  | 5036   | proliferation-associated 2G4, 38kDa (PA2G4), mRNA.                                                                                            | -0.09 | 7.58  | 1.07E-06 | 2.18E-06 | yellow |
| PARVG  | 64098  | parvin, gamma (PARVG), mRNA.                                                                                                                  | 0.20  | 6.85  | 3.41E-16 | 1.20E-15 | yellow |
| PCCB   | 5096   | propionyl Coenzyme A carboxylase, beta polypeptide (PCCB), mRNA.                                                                              | -0.06 | 5.67  | 4.90E-03 | 7.21E-03 | yellow |
| PCID2  | 55795  | PCI domain containing 2 (PCID2), mRNA.                                                                                                        | -0.02 | 9.16  | 1.83E-01 | 2.18E-01 | yellow |

|         |        |                                                                                |       |       |          |          |        |
|---------|--------|--------------------------------------------------------------------------------|-------|-------|----------|----------|--------|
| PDHB    | 5162   | pyruvate dehydrogenase (lipoamide) beta (PDHB), mRNA.                          | 0.06  | 10.43 | 3.93E-05 | 7.09E-05 | yellow |
| PEF1    | 553115 | penta-EF-hand domain containing 1 (PEF1), mRNA.                                | -0.06 | 8.79  | 1.42E-06 | 2.86E-06 | yellow |
| PELP1   | 27043  | proline, glutamic acid and leucine rich protein 1 (PELP1), mRNA.               | 0.08  | 7.51  | 8.93E-07 | 1.83E-06 | yellow |
| PFAS    | 5198   | phosphoribosylformylglycinamide synthase (FGAR amidotransferase) (PFAS), mRNA. | 0.03  | 7.61  | 7.37E-02 | 9.40E-02 | yellow |
| PFKFB4  | 5210   | 6-phosphofructo-2-kinase/fructose-2,6-biphosphatase 4 (PFKFB4), mRNA.          | 0.63  | 8.36  | 7.69E-78 | 5.66E-76 | yellow |
| PFKL    | 5211   | phosphofructokinase, liver (PFKL), transcript variant 2, mRNA.                 | 0.12  | 6.78  | 2.29E-10 | 5.89E-10 | yellow |
| PFKP    | 5214   | phosphofructokinase, platelet (PFKP), mRNA.                                    | 0.01  | 7.03  | 6.21E-01 | 6.61E-01 | yellow |
| PGRMC1  | 10857  | progesterone receptor membrane component 1 (PGRMC1), mRNA.                     | -0.12 | 10.01 | 1.02E-21 | 4.73E-21 | yellow |
| PHYH    | 5264   | phytanoyl-CoA 2-hydroxylase (PHYH), transcript variant 2, mRNA.                | -0.03 | 7.73  | 3.60E-02 | 4.78E-02 | yellow |
| PITPNM1 | 9600   | phosphatidylinositol transfer protein, membrane-associated 1 (PITPNM1), mRNA.  | -0.46 | 10.31 | 3.25E-78 | 2.46E-76 | yellow |
| PITRM1  | 10531  | pitrilysin metallopeptidase 1 (PITRM1), mRNA.                                  | -0.14 | 7.98  | 1.98E-15 | 6.67E-15 | yellow |

|         |       |                                                                                                       |       |       |          |          |        |
|---------|-------|-------------------------------------------------------------------------------------------------------|-------|-------|----------|----------|--------|
| PKM     | 5315  | pyruvate kinase, muscle (PKM2), transcript variant 2, mRNA.                                           | 0.36  | 8.28  | 1.88E-44 | 2.33E-43 | yellow |
| PKN1    | 5585  | protein kinase N1 (PKN1), transcript variant 2, mRNA.                                                 | 0.03  | 8.52  | 6.26E-02 | 8.06E-02 | yellow |
| PLA2G4C | 8605  | phospholipase A2, group IVC (cytosolic, calcium-independent) (PLA2G4C), mRNA.                         | 0.00  | 12.42 | 7.86E-01 | 8.14E-01 | yellow |
| PLCB2   | 5330  | phospholipase C, beta 2 (PLCB2), mRNA.                                                                | -0.10 | 8.15  | 8.05E-08 | 1.77E-07 | yellow |
| PLCXD1  | 55344 | phosphatidylinositol-specific phospholipase C, X domain containing 1 (PLCXD1), mRNA.                  | -0.07 | 8.06  | 3.35E-04 | 5.56E-04 | yellow |
| PLEKHO2 | 80301 | pleckstrin homology domain containing, family Q member 1 (PLEKHQ1), mRNA.                             | 0.13  | 9.50  | 5.41E-19 | 2.21E-18 | yellow |
| PMPCB   | 9512  | peptidase (mitochondrial processing) beta (PMPCB), nuclear gene encoding mitochondrial protein, mRNA. | -0.05 | 9.41  | 8.78E-07 | 1.80E-06 | yellow |
| PNPLA6  | 10908 | patatin-like phospholipase domain containing 6 (PNPLA6), mRNA.                                        | -0.02 | 6.68  | 4.36E-01 | 4.83E-01 | yellow |
| PNPO    | 55163 | pyridoxamine 5'-phosphate oxidase (PNPO), mRNA.                                                       | 0.17  | 8.02  | 4.92E-22 | 2.31E-21 | yellow |
| POLD1   | 5424  | polymerase (DNA directed), delta 1, catalytic subunit 125kDa (POLD1), mRNA.                           | -0.59 | 9.33  | 2.60E-83 | 2.80E-81 | yellow |

|         |       |                                                                                                            |       |      |          |          |        |
|---------|-------|------------------------------------------------------------------------------------------------------------|-------|------|----------|----------|--------|
| POLR1D  | 51082 | polymerase (RNA) I polypeptide D, 16kDa (POLR1D), transcript variant 1, mRNA.                              | 0.05  | 9.89 | 1.45E-02 | 2.02E-02 | yellow |
| POLRMT  | 5442  | polymerase (RNA) mitochondrial (DNA directed) (POLRMT), nuclear gene encoding mitochondrial protein, mRNA. | 0.03  | 8.57 | 2.48E-02 | 3.36E-02 | yellow |
| PPA1    | 5464  | pyrophosphatase (inorganic) 1 (PPA1), mRNA.                                                                | 0.01  | 8.26 | 6.21E-01 | 6.61E-01 | yellow |
| PPME1   | 51400 | protein phosphatase methylesterase 1 (PPME1), mRNA.                                                        | 0.05  | 9.58 | 4.09E-06 | 8.00E-06 | yellow |
| PPP1R10 | 5514  | protein phosphatase 1, regulatory (inhibitor) subunit 10 (PPP1R10), mRNA.                                  | 0.48  | 5.84 | 7.51E-54 | 1.38E-52 | yellow |
| PPP2R1A | 5518  | protein phosphatase 2 (formerly 2A), regulatory subunit A , alpha isoform (PPP2R1A), mRNA.                 | 0.00  | 7.72 | 7.97E-01 | 8.23E-01 | yellow |
| PPP2R3B | 28227 | protein phosphatase 2 (formerly 2A), regulatory subunit B", beta (PPP2R3B), transcript variant 2, mRNA.    | -0.11 | 7.32 | 9.16E-11 | 2.40E-10 | yellow |
| PPP6R1  | 22870 | SAPS domain family, member 1 (SAPS1), mRNA.                                                                | -0.02 | 8.64 | 2.98E-01 | 3.43E-01 | yellow |
| PREB    | 10113 | prolactin regulatory element binding (PREB), mRNA.                                                         | -0.07 | 9.30 | 5.99E-06 | 1.16E-05 | yellow |
| PRKX    | 5613  | protein kinase, X-linked (PRKX), mRNA.                                                                     | 0.01  | 9.59 | 1.71E-01 | 2.05E-01 | yellow |

|        |       |                                                                                                 |       |      |          |          |        |
|--------|-------|-------------------------------------------------------------------------------------------------|-------|------|----------|----------|--------|
| PRPF3  | 9129  | PRP3 pre-mRNA processing factor 3 homolog (S. cerevisiae) (PRPF3), mRNA.                        | 0.11  | 8.03 | 9.13E-10 | 2.26E-09 | yellow |
| PRPF31 | 26121 | PRP31 pre-mRNA processing factor 31 homolog (S. cerevisiae) (PRPF31), mRNA.                     | 0.08  | 8.66 | 8.03E-09 | 1.88E-08 | yellow |
| PRPF8  | 10594 | PRP8 pre-mRNA processing factor 8 homolog (S. cerevisiae) (PRPF8), mRNA.                        | 0.06  | 8.07 | 3.36E-05 | 6.11E-05 | yellow |
| PRRC2A | 7916  | HLA-B associated transcript 2 (BAT2), transcript variant 2, mRNA.                               | 0.04  | 8.88 | 4.47E-03 | 6.62E-03 | yellow |
| PSMD1  | 5707  | proteasome (prosome, macropain) 26S subunit, non-ATPase, 1 (PSMD1), mRNA.                       | 0.11  | 8.96 | 1.44E-13 | 4.42E-13 | yellow |
| PSMD2  | 5708  | proteasome (prosome, macropain) 26S subunit, non-ATPase, 2 (PSMD2), mRNA.                       | 0.10  | 7.40 | 1.11E-10 | 2.89E-10 | yellow |
| PSMF1  | 9491  | proteasome (prosome, macropain) inhibitor subunit 1 (PI31) (PSMF1), transcript variant 1, mRNA. | -0.18 | 8.04 | 8.64E-33 | 6.32E-32 | yellow |
| PTGR1  | 22949 | leukotriene B4 12-hydroxydehydrogenase (LTB4DH), mRNA.                                          | 0.15  | 7.71 | 7.41E-13 | 2.19E-12 | yellow |
| PTMS   | 5763  | parathymosin (PTMS), mRNA.                                                                      | 0.10  | 8.37 | 2.03E-08 | 4.62E-08 | yellow |
| PTOV1  | 53635 | prostate tumor overexpressed gene 1 (PTOV1), mRNA.                                              | 0.12  | 6.18 | 1.32E-14 | 4.28E-14 | yellow |



|         |       |                                                                          |       |       |          |          |        |
|---------|-------|--------------------------------------------------------------------------|-------|-------|----------|----------|--------|
| PTPN23  | 25930 | protein tyrosine phosphatase, non-receptor type 23 (PTPN23), mRNA.       | -0.06 | 9.07  | 5.40E-05 | 9.61E-05 | yellow |
| PYCR1   | 5831  | pyrroline-5-carboxylate reductase 1 (PYCR1), transcript variant 1, mRNA. | -0.01 | 7.79  | 3.49E-01 | 3.94E-01 | yellow |
| PYCR2   | 29920 | pyrroline-5-carboxylate reductase family, member 2 (PYCR2), mRNA.        | 0.01  | 7.33  | 7.18E-01 | 7.51E-01 | yellow |
| PYGB    | 5834  | phosphorylase, glycogen; brain (PYGB), mRNA.                             | 0.03  | 7.63  | 7.55E-02 | 9.62E-02 | yellow |
| PYGO2   | 90780 | pygopus homolog 2 (Drosophila) (PYGO2), mRNA.                            | 0.01  | 10.11 | 7.36E-01 | 7.68E-01 | yellow |
| R3HDM4  | 91300 | chromosome 19 open reading frame 22 (C19orf22), mRNA.                    | 0.01  | 7.36  | 7.10E-01 | 7.44E-01 | yellow |
| RAB20   | 55647 | RAB20, member RAS oncogene family (RAB20), mRNA.                         | -0.30 | 8.96  | 5.80E-32 | 4.10E-31 | yellow |
| RAB5C   | 5878  | RAB5C, member RAS oncogene family (RAB5C), transcript variant 1, mRNA.   | -0.04 | 7.43  | 2.21E-02 | 3.01E-02 | yellow |
| RABL6   | 55684 | chromosome 9 open reading frame 86 (C9orf86), mRNA.                      | 0.05  | 9.62  | 4.54E-03 | 6.71E-03 | yellow |
| RAD23A  | 5886  | RAD23 homolog A (S. cerevisiae) (RAD23A), mRNA.                          | -0.09 | 6.79  | 8.37E-04 | 1.34E-03 | yellow |
| RAPGEF6 | 51735 | Rap guanine nucleotide exchange factor (GEF) 6 (RAPGEF6), mRNA.          | 0.07  | 9.57  | 2.35E-07 | 5.01E-07 | yellow |

|         |        |                                                                                  |       |      |          |          |        |
|---------|--------|----------------------------------------------------------------------------------|-------|------|----------|----------|--------|
| RAVER1  | 125950 | ribonucleoprotein, PTB-binding 1 (RAVER1), mRNA.                                 | -0.08 | 6.78 | 2.19E-07 | 4.68E-07 | yellow |
| RBM10   | 8241   | RNA binding motif protein 10 (RBM10), transcript variant 1, mRNA.                | -0.06 | 8.50 | 1.00E-02 | 1.43E-02 | yellow |
| RBM42   | 79171  | hypothetical protein MGC10433 (MGC10433), mRNA.                                  | 0.31  | 6.43 | 1.66E-34 | 1.30E-33 | yellow |
| RCC1    | 751867 | regulator of chromosome condensation 1 (SNHG3-RCC1), transcript variant 1, mRNA. | -0.14 | 6.04 | 5.31E-12 | 1.49E-11 | yellow |
| RECQL4  | 9401   | RecQ protein-like 4 (RECQL4), mRNA.                                              | 0.20  | 8.33 | 1.96E-13 | 5.98E-13 | yellow |
| RFX1    | 5989   | regulatory factor X, 1 (influences HLA class II expression) (RFX1), mRNA.        | -0.06 | 7.33 | 2.22E-07 | 4.73E-07 | yellow |
| RGS19   | 10287  | regulator of G-protein signalling 19 (RGS19), transcript variant 2, mRNA.        | -0.16 | 6.79 | 2.74E-27 | 1.63E-26 | yellow |
| RHOT2   | 89941  | ras homolog gene family, member T2 (RHOT2), mRNA.                                | -0.19 | 8.27 | 5.56E-36 | 4.66E-35 | yellow |
| RNF144A | 9781   | ring finger protein 144 (RNF144), mRNA.                                          | -0.04 | 9.36 | 6.82E-02 | 8.75E-02 | yellow |
| RNF40   | 9810   | ring finger protein 40 (RNF40), mRNA.                                            | -0.01 | 6.36 | 7.28E-01 | 7.60E-01 | yellow |
| RORA    | 6095   | RAR-related orphan receptor A (RORA), transcript variant 2, mRNA.                | 0.07  | 7.82 | 1.13E-04 | 1.95E-04 | yellow |
| RPL29   | 6159   | ribosomal protein L29 (RPL29), mRNA.                                             | 0.06  | 8.10 | 2.07E-05 | 3.83E-05 | yellow |

|         |        |                                                                                                               |       |       |          |          |        |
|---------|--------|---------------------------------------------------------------------------------------------------------------|-------|-------|----------|----------|--------|
| RPL9    | 6133   | ribosomal protein L9 (RPL9), transcript variant 2, mRNA.                                                      | -0.06 | 8.67  | 1.08E-06 | 2.19E-06 | yellow |
| RPS6KA4 | 8986   | ribosomal protein S6 kinase, 90kDa, polypeptide 4 (RPS6KA4), transcript variant 1, mRNA.                      | 0.03  | 9.03  | 1.94E-03 | 2.98E-03 | yellow |
| RPUSD1  | 113000 | RNA pseudouridylate synthase domain containing 1 (RPUSD1), mRNA.                                              | 0.21  | 7.43  | 1.08E-22 | 5.25E-22 | yellow |
| RRP12   | 23223  | ribosomal RNA processing 12 homolog (S. cerevisiae) (RRP12), mRNA.                                            | -0.04 | 8.98  | 1.40E-02 | 1.95E-02 | yellow |
| SAC3D1  | 29901  | SAC3 domain containing 1 (SAC3D1), mRNA.                                                                      | 0.04  | 7.14  | 6.02E-02 | 7.77E-02 | yellow |
| SAFB2   | 9667   | scaffold attachment factor B2 (SAFB2), mRNA.                                                                  | -0.09 | 9.30  | 1.64E-12 | 4.76E-12 | yellow |
| SAMD1   | 90378  | sterile alpha motif domain containing 1 (SAMD1), mRNA.                                                        | -0.31 | 7.49  | 4.18E-54 | 7.95E-53 | yellow |
| SAP30L  | 79685  | SAP30-like (SAP30L), mRNA.                                                                                    | -0.04 | 9.14  | 2.55E-03 | 3.86E-03 | yellow |
| SCAF4   | 57466  | splicing factor, arginine/serine-rich 15 (SFRS15), mRNA.                                                      | 0.50  | 6.39  | 1.22E-51 | 2.05E-50 | yellow |
| SCO1    | 6341   | SCO cytochrome oxidase deficient homolog 1 (yeast) (SCO1), nuclear gene encoding mitochondrial protein, mRNA. | 0.05  | 10.53 | 1.03E-06 | 2.09E-06 | yellow |
| SDF4    | 51150  | stromal cell derived factor 4 (SDF4), mRNA.                                                                   | -0.13 | 8.38  | 4.80E-16 | 1.68E-15 | yellow |

|         |       |                                                                                                                                                        |       |      |          |          |        |
|---------|-------|--------------------------------------------------------------------------------------------------------------------------------------------------------|-------|------|----------|----------|--------|
| SEMA4B  | 10509 | sema domain, immunoglobulin domain (Ig), transmembrane domain (TM) and short cytoplasmic domain, (semaphorin) 4B (SEMA4B), transcript variant 1, mRNA. | -0.20 | 6.75 | 1.09E-31 | 7.59E-31 | yellow |
| SEPN1   | 57190 | selenoprotein N, 1 (SEPN1), transcript variant 2, mRNA.                                                                                                | -0.03 | 9.92 | 4.83E-03 | 7.10E-03 | yellow |
| SETD1A  | 9739  | SET domain containing 1A (SETD1A), mRNA.                                                                                                               | -0.07 | 8.86 | 5.03E-10 | 1.26E-09 | yellow |
| SF3A2   | 8175  | splicing factor 3a, subunit 2, 66kDa (SF3A2), mRNA.                                                                                                    | -0.05 | 6.19 | 1.40E-03 | 2.18E-03 | yellow |
| SF3B4   | 10262 | splicing factor 3b, subunit 4, 49kDa (SF3B4), mRNA.                                                                                                    | 0.10  | 8.47 | 4.03E-08 | 8.99E-08 | yellow |
| SH3BP1  | 23616 | SH3-domain binding protein 1 (SH3BP1), mRNA.                                                                                                           | -0.15 | 7.00 | 1.44E-17 | 5.49E-17 | yellow |
| SH3TC1  | 54436 | SH3 domain and tetratricopeptide repeats 1 (SH3TC1), mRNA.                                                                                             | -0.04 | 9.31 | 2.12E-03 | 3.24E-03 | yellow |
| SHC1    | 6464  | SHC (Src homology 2 domain containing) transforming protein 1 (SHC1), transcript variant 2, mRNA.                                                      | -0.08 | 7.65 | 2.02E-08 | 4.60E-08 | yellow |
| SIGMAR1 | 10280 | opioid receptor, sigma 1 (OPRS1), transcript variant 3, mRNA.                                                                                          | -0.08 | 7.27 | 4.33E-09 | 1.03E-08 | yellow |
| SKP2    | 6502  | S-phase kinase-associated protein 2 (p45) (SKP2), transcript variant 2, mRNA.                                                                          | 0.35  | 7.08 | 6.51E-41 | 6.80E-40 | yellow |

|          |       |                                                                                                                                                  |       |       |          |          |        |
|----------|-------|--------------------------------------------------------------------------------------------------------------------------------------------------|-------|-------|----------|----------|--------|
| SLC17A5  | 26503 | solute carrier family 17 (anion/sugar transporter), member 5 (SLC17A5), mRNA.                                                                    | 0.04  | 7.49  | 2.73E-02 | 3.67E-02 | yellow |
| SLC17A9  | 63910 | chromosome 20 open reading frame 59 (C20orf59), mRNA.                                                                                            | 0.02  | 8.45  | 1.50E-01 | 1.82E-01 | yellow |
| SLC1A5   | 6510  | solute carrier family 1 (neutral amino acid transporter), member 5 (SLC1A5), mRNA.                                                               | 0.13  | 7.02  | 6.14E-12 | 1.72E-11 | yellow |
| SLC25A22 | 79751 | solute carrier family 25 (mitochondrial carrier: glutamate), member 22 (SLC25A22), mRNA.                                                         | 0.01  | 10.62 | 6.60E-01 | 6.97E-01 | yellow |
| SLC25A39 | 51629 | solute carrier family 25, member 39 (SLC25A39), mRNA.                                                                                            | -0.12 | 7.79  | 2.68E-08 | 6.07E-08 | yellow |
| SLC25A6  | 293   | solute carrier family 25 (mitochondrial carrier; adenine nucleotide translocator), member 6 (SLC25A6), mRNA.                                     | -0.18 | 7.75  | 1.83E-33 | 1.37E-32 | yellow |
| SLC29A1  | 2030  | solute carrier family 29 (nucleoside transporters), member 1 (SLC29A1), nuclear gene encoding mitochondrial protein, transcript variant 3, mRNA. | -0.10 | 5.55  | 7.64E-08 | 1.68E-07 | yellow |

|         |       |                                                                                                                                          |       |       |          |          |        |
|---------|-------|------------------------------------------------------------------------------------------------------------------------------------------|-------|-------|----------|----------|--------|
| SLC2A6  | 11182 | solute carrier family 2 (facilitated glucose transporter), member 6 (SLC2A6), mRNA.                                                      | -0.02 | 9.72  | 7.46E-02 | 9.51E-02 | yellow |
| SLC38A5 | 92745 | solute carrier family 38, member 5 (SLC38A5), mRNA.                                                                                      | 0.13  | 6.00  | 1.67E-16 | 5.99E-16 | yellow |
| SLC4A2  | 6522  | solute carrier family 4, anion exchanger, member 2 (erythrocyte membrane protein band 3-like 1) (SLC4A2), mRNA.                          | -0.01 | 7.32  | 4.37E-01 | 4.84E-01 | yellow |
| SMAD3   | 4088  | SMAD family member 3 (SMAD3), mRNA.                                                                                                      | 0.21  | 7.18  | 4.63E-23 | 2.28E-22 | yellow |
| SMARCB1 | 6598  | SWI/SNF related, matrix associated, actin dependent regulator of chromatin, subfamily b, member 1 (SMARCB1), transcript variant 1, mRNA. | 0.05  | 8.08  | 3.03E-03 | 4.55E-03 | yellow |
| SMARCC2 | 6601  | SWI/SNF related, matrix associated, actin dependent regulator of chromatin, subfamily c, member 2 (SMARCC2), transcript variant 2, mRNA. | -0.04 | 10.51 | 4.04E-02 | 5.33E-02 | yellow |
| SMG5    | 23381 | Smg-5 homolog, nonsense mediated mRNA decay factor (C. elegans) (SMG5), mRNA.                                                            | 0.09  | 9.86  | 2.74E-08 | 6.20E-08 | yellow |

|        |        |                                                                                                     |       |       |          |          |        |
|--------|--------|-----------------------------------------------------------------------------------------------------|-------|-------|----------|----------|--------|
| SMG7   | 9887   | Smg-7 homolog, nonsense mediated mRNA decay factor (C. elegans) (SMG7), transcript variant 3, mRNA. | -0.10 | 9.46  | 2.68E-12 | 7.64E-12 | yellow |
| SMIM19 | 114926 | chromosome 8 open reading frame 40 (C8orf40), mRNA.                                                 | -0.17 | 6.69  | 4.25E-27 | 2.50E-26 | yellow |
| SNX11  | 29916  | sorting nexin 11 (SNX11), transcript variant 2, mRNA.                                               | -0.22 | 5.73  | 3.25E-22 | 1.53E-21 | yellow |
| SNX3   | 8724   | sorting nexin 3 (SNX3), mRNA.                                                                       | -0.08 | 11.57 | 4.80E-05 | 8.58E-05 | yellow |
| SOX18  | 54345  | SRY (sex determining region Y)-box 18 (SOX18), mRNA.                                                | 0.00  | 7.97  | 8.90E-01 | 9.07E-01 | yellow |
| SPTAN1 | 6709   | spectrin, alpha, non-erythrocytic 1 (alpha-fodrin) (SPTAN1), mRNA.                                  | -0.39 | 9.60  | 5.19E-44 | 6.29E-43 | yellow |
| SREBF2 | 6721   | sterol regulatory element binding transcription factor 2 (SREBF2), mRNA.                            | 0.26  | 7.24  | 1.61E-35 | 1.32E-34 | yellow |
| SRRM2  | 23524  | serine/arginine repetitive matrix 2 (SRRM2), mRNA.                                                  | -0.05 | 7.73  | 9.39E-03 | 1.34E-02 | yellow |
| SRRT   | 51593  | ARS2 protein (ARS2), transcript variant 1, mRNA.                                                    | 0.01  | 7.55  | 4.47E-01 | 4.94E-01 | yellow |
| SSRP1  | 6749   | structure specific recognition protein 1 (SSRP1), mRNA.                                             | -0.15 | 7.41  | 2.51E-19 | 1.04E-18 | yellow |
| STAT5A | 6776   | signal transducer and activator of transcription 5A (STAT5A), mRNA.                                 | 0.05  | 7.30  | 1.23E-03 | 1.93E-03 | yellow |
| STXBP2 | 6813   | syntaxin binding protein 2 (STXBP2), mRNA.                                                          | 0.02  | 7.74  | 3.28E-01 | 3.73E-01 | yellow |
| SUPT5H | 6829   | suppressor of Ty 5 homolog (S. cerevisiae) (SUPT5H), mRNA.                                          | -0.09 | 9.77  | 4.43E-13 | 1.33E-12 | yellow |

|          |        |                                                                                                    |       |      |          |          |        |
|----------|--------|----------------------------------------------------------------------------------------------------|-------|------|----------|----------|--------|
| SUSD6    | 9766   | KIAA0247 (KIAA0247), mRNA.                                                                         | 0.02  | 8.56 | 1.69E-01 | 2.03E-01 | yellow |
| SYNGR1   | 9145   | synaptogyrin 1 (SYNGR1), transcript variant 1c, mRNA.                                              | 0.00  | 8.38 | 8.18E-01 | 8.43E-01 | yellow |
| TACC3    | 10460  | transforming, acidic coiled-coil containing protein 3 (TACC3), mRNA.                               | 0.06  | 9.40 | 1.06E-07 | 2.32E-07 | yellow |
| TAPBP    | 6892   | TAP binding protein (tapasin) (TAPBP), transcript variant 1, mRNA.                                 | -0.05 | 8.82 | 8.93E-05 | 1.56E-04 | yellow |
| TAX1BP1  | 8887   | Tax1 (human T-cell leukemia virus type I) binding protein 1 (TAX1BP1), transcript variant 1, mRNA. | -0.02 | 6.68 | 2.74E-01 | 3.17E-01 | yellow |
| TBC1D10C | 374403 | TBC1 domain family, member 10C (TBC1D10C), mRNA.                                                   | -0.10 | 6.98 | 3.00E-11 | 8.07E-11 | yellow |
| TBCB     | 1155   | tubulin folding cofactor B (TBCB), mRNA.                                                           | 0.02  | 8.91 | 2.33E-01 | 2.73E-01 | yellow |
| TBCE     | 6905   | tubulin folding cofactor E (TBCE), transcript variant 1, mRNA.                                     | 0.06  | 8.17 | 1.66E-07 | 3.57E-07 | yellow |
| TCEAL4   | 79921  | transcription elongation factor A (SII)-like 4 (TCEAL4), transcript variant 4, mRNA.               | 0.06  | 8.68 | 4.13E-04 | 6.81E-04 | yellow |
| TCEAL8   | 90843  | transcription elongation factor A (SII)-like 8 (TCEAL8), transcript variant 1, mRNA.               | 0.26  | 7.97 | 2.33E-34 | 1.81E-33 | yellow |



|          |        |                                                                                                                                |       |       |          |          |        |
|----------|--------|--------------------------------------------------------------------------------------------------------------------------------|-------|-------|----------|----------|--------|
| TCIRG1   | 10312  | T-cell, immune regulator 1, ATPase, H <sup>+</sup> transporting, lysosomal V0 subunit A3 (TCIRG1), transcript variant 1, mRNA. | 0.10  | 8.79  | 8.09E-11 | 2.13E-10 | yellow |
| TCTN1    | 79600  | tectonic (FLJ21127), mRNA.                                                                                                     | -0.16 | 7.29  | 1.66E-21 | 7.58E-21 | yellow |
| TESK1    | 7016   | testis-specific kinase 1 (TESK1), mRNA.                                                                                        | -0.01 | 8.30  | 2.36E-01 | 2.76E-01 | yellow |
| TIMM8A   | 1678   | translocase of inner mitochondrial membrane 8 homolog A (yeast) (TIMM8A), nuclear gene encoding mitochondrial protein, mRNA.   | -0.07 | 6.28  | 3.55E-08 | 7.96E-08 | yellow |
| TMEM109  | 79073  | transmembrane protein 109 (TMEM109), mRNA.                                                                                     | -0.05 | 7.19  | 3.19E-07 | 6.73E-07 | yellow |
| TMEM126B | 55863  | transmembrane protein 126B (TMEM126B), mRNA.                                                                                   | 0.04  | 6.24  | 1.33E-02 | 1.87E-02 | yellow |
| TMEM214  | 54867  | hypothetical protein FLJ20254 (FLJ20254), mRNA.                                                                                | -0.08 | 6.84  | 2.56E-09 | 6.18E-09 | yellow |
| TMEM241  | 85019  | chromosome 18 open reading frame 45 (C18orf45), mRNA.                                                                          | -0.13 | 6.28  | 7.97E-19 | 3.22E-18 | yellow |
| TMEM8A   | 58986  | transmembrane protein 8 (five membrane-spanning domains) (TMEM8), mRNA.                                                        | 0.05  | 10.12 | 6.95E-05 | 1.23E-04 | yellow |
| TMEM99   | 147184 | transmembrane protein 99 (TMEM99), mRNA.                                                                                       | 0.03  | 8.96  | 2.61E-03 | 3.95E-03 | yellow |

|          |        |                                                                                             |       |       |          |          |        |
|----------|--------|---------------------------------------------------------------------------------------------|-------|-------|----------|----------|--------|
| TNFRSF8  | 943    | tumor necrosis factor receptor superfamily, member 8 (TNFRSF8), transcript variant 2, mRNA. | -0.28 | 7.75  | 1.30E-53 | 2.33E-52 | yellow |
| TNRC6A   | 27327  | trinucleotide repeat containing 6A (TNRC6A), mRNA.                                          | 0.11  | 7.64  | 6.38E-10 | 1.59E-09 | yellow |
| TPR      | 7175   | translocated promoter region (to activated MET oncogene) (TPR), mRNA.                       | -0.09 | 6.95  | 2.21E-06 | 4.40E-06 | yellow |
| TPX2     | 22974  | TPX2, microtubule-associated, homolog ( <i>Xenopus laevis</i> ) (TPX2), mRNA.               | 0.01  | 10.43 | 2.65E-01 | 3.07E-01 | yellow |
| TRAPPC12 | 51112  | tetratricopeptide repeat domain 15 (TTC15), mRNA.                                           | -0.24 | 8.17  | 3.54E-17 | 1.32E-16 | yellow |
| TRIM28   | 10155  | tripartite motif-containing 28 (TRIM28), mRNA.                                              | -0.08 | 9.95  | 1.40E-05 | 2.64E-05 | yellow |
| TRIM56   | 81844  | tripartite motif-containing 56 (TRIM56), mRNA.                                              | 0.27  | 6.01  | 1.23E-39 | 1.22E-38 | yellow |
| TROAP    | 10024  | trophinin associated protein (tastin) (TROAP), mRNA.                                        | -0.10 | 8.40  | 1.50E-14 | 4.83E-14 | yellow |
| TRPV2    | 51393  | transient receptor potential cation channel, subfamily V, member 2 (TRPV2), mRNA.           | -0.01 | 8.90  | 5.94E-01 | 6.36E-01 | yellow |
| TSR3     | 115939 | chromosome 16 open reading frame 42 (C16orf42), mRNA.                                       | -0.08 | 10.43 | 4.07E-10 | 1.03E-09 | yellow |
| TTLL12   | 23170  | tubulin tyrosine ligase-like family, member 12 (TTLL12), mRNA.                              | 0.34  | 7.56  | 1.85E-44 | 2.30E-43 | yellow |

|         |       |                                                                                                                           |       |       |          |          |        |
|---------|-------|---------------------------------------------------------------------------------------------------------------------------|-------|-------|----------|----------|--------|
| TXNDC15 | 79770 | chromosome 5 open reading frame 14 (C5orf14), mRNA.                                                                       | 0.29  | 6.42  | 4.29E-45 | 5.50E-44 | yellow |
| UBA1    | 7317  | ubiquitin-activating enzyme E1 (A1S9T and BN75 temperature sensitivity complementing) (UBE1), transcript variant 2, mRNA. | -0.14 | 8.55  | 1.70E-22 | 8.12E-22 | yellow |
| UBAP2L  | 9898  | ubiquitin associated protein 2-like (UBAP2L), mRNA.                                                                       | 0.00  | 6.37  | 9.44E-01 | 9.52E-01 | yellow |
| UBE2Z   | 65264 | ubiquitin-conjugating enzyme E2Z (putative) (UBE2Z), mRNA.                                                                | 0.15  | 7.92  | 1.22E-17 | 4.66E-17 | yellow |
| UNC119  | 9094  | unc-119 homolog (C. elegans) (UNC119), transcript variant 1, mRNA.                                                        | -0.45 | 8.38  | 5.70E-42 | 6.33E-41 | yellow |
| UPF1    | 5976  | UPF1 regulator of nonsense transcripts homolog (yeast) (UPF1), mRNA.                                                      | -0.22 | 8.43  | 4.42E-20 | 1.90E-19 | yellow |
| UPF3A   | 65110 | UPF3 regulator of nonsense transcripts homolog A (yeast) (UPF3A), transcript variant 1, mRNA.                             | -0.32 | 7.98  | 9.07E-33 | 6.62E-32 | yellow |
| UQCC1   | 55245 | chromosome 20 open reading frame 44 (C20orf44), transcript variant 3, mRNA.                                               | 0.06  | 11.20 | 1.58E-04 | 2.70E-04 | yellow |
| UROD    | 7389  | uroporphyrinogen decarboxylase (UROD), mRNA.                                                                              | -0.06 | 6.84  | 5.65E-05 | 1.00E-04 | yellow |
| USF2    | 7392  | upstream transcription factor 2, c-fos interacting (USF2), transcript variant 1, mRNA.                                    | 0.05  | 8.43  | 2.14E-03 | 3.27E-03 | yellow |

|        |        |                                                                              |       |       |          |          |        |
|--------|--------|------------------------------------------------------------------------------|-------|-------|----------|----------|--------|
| USP5   | 8078   | ubiquitin specific peptidase 5 (isopeptidase T) (USP5), mRNA.                | 0.33  | 7.33  | 2.32E-33 | 1.72E-32 | yellow |
| VAR5   | 7407   | valyl-tRNA synthetase (VAR5), mRNA.                                          | 0.11  | 7.89  | 7.22E-16 | 2.51E-15 | yellow |
| VEZT   | 55591  | vezatin, adherens junctions transmembrane protein (VEZT), mRNA.              | 0.02  | 10.03 | 4.67E-02 | 6.11E-02 | yellow |
| VPS35  | 55737  | vacuolar protein sorting 35 homolog (S. cerevisiae) (VPS35), mRNA.           | -0.03 | 9.94  | 5.64E-03 | 8.25E-03 | yellow |
| VPS51  | 738    | chromosome 11 open reading frame2 (C11orf2), mRNA.                           | -0.02 | 8.17  | 3.13E-01 | 3.57E-01 | yellow |
| WASF2  | 10163  | WAS protein family, member 2 (WASF2), mRNA.                                  | 0.17  | 6.02  | 4.09E-22 | 1.92E-21 | yellow |
| WDR6   | 11180  | WD repeat domain 6 (WDR6), mRNA.                                             | -0.22 | 8.69  | 1.27E-35 | 1.05E-34 | yellow |
| WDR82  | 80335  | transmembrane protein 113 (TMEM113), mRNA.                                   | 0.27  | 7.44  | 3.86E-25 | 2.11E-24 | yellow |
| WDSUB1 | 151525 | WD repeat, sterile alpha motif and U-box domain containing 1 (WDSUB1), mRNA. | 0.06  | 7.48  | 9.82E-06 | 1.87E-05 | yellow |
| XAB2   | 56949  | XPA binding protein 2 (XAB2), mRNA.                                          | 0.03  | 6.06  | 2.70E-02 | 3.64E-02 | yellow |
| YEATS2 | 55689  | YEATS domain containing 2 (YEATS2), mRNA.                                    | 0.18  | 8.94  | 1.84E-27 | 1.10E-26 | yellow |
| ZC3H14 | 79882  | zinc finger CCCH-type containing 14 (ZC3H14), transcript variant 1, mRNA.    | 0.02  | 8.30  | 1.48E-01 | 1.80E-01 | yellow |

|         |        |                                                                  |       |      |          |          |        |
|---------|--------|------------------------------------------------------------------|-------|------|----------|----------|--------|
| ZFP36   | 7538   | zinc finger protein 36, C3H type, homolog (mouse) (ZFP36), mRNA. | -0.09 | 7.94 | 1.89E-08 | 4.31E-08 | yellow |
| ZFYVE21 | 79038  | zinc finger, FYVE domain containing 21 (ZFYVE21), mRNA.          | 0.08  | 8.53 | 3.07E-06 | 6.05E-06 | yellow |
| ZNF277  | 11179  | zinc finger protein 277 pseudogene (ZNF277P), mRNA.              | 0.17  | 6.53 | 8.06E-24 | 4.13E-23 | yellow |
| ZNF444  | 55311  | zinc finger protein 444 (ZNF444), mRNA.                          | -0.06 | 8.05 | 4.58E-07 | 9.54E-07 | yellow |
| ZNF581  | 51545  | zinc finger protein 581 (ZNF581), mRNA.                          | 0.14  | 8.17 | 1.43E-25 | 7.95E-25 | yellow |
| ZNF586  | 54807  | zinc finger protein 586 (ZNF586), transcript variant 2, mRNA.    | -0.36 | 7.82 | 1.11E-38 | 1.06E-37 | yellow |
| ZNF816  | 125893 | zinc finger protein 816A (ZNF816A), mRNA.                        | 0.07  | 9.95 | 8.96E-07 | 1.83E-06 | yellow |

Table S3. Association between differentially expressed genes and three ICS response miRs using linear mixed model.

| Dependent_variable(Gene Entrez ID) | Symbol | Definition                                                                                 | Independent_variable | beta   | pvalue   | p.adjust | Reactome Pathway                                 |
|------------------------------------|--------|--------------------------------------------------------------------------------------------|----------------------|--------|----------|----------|--------------------------------------------------|
| 51649                              | MRPS23 | mitochondrial ribosomal protein S23 (MRPS23), nuclear gene encoding mitochondrial protein. | hsa.miR.339.3p       | -0.033 | 9.80E-07 | 8.28E-03 | R-HSA-392499~Metabolism of proteins              |
| 5688                               | PSMA7  | proteasome (prosome, macropain) subunit, alpha type, 7 (PSMA7).                            | hsa.miR.339.3p       | -0.032 | 7.67E-06 | 2.22E-02 | R-HSA-1169091~Activation of NF-kappaB in B cells |
| 1211                               | CLTA   | clathrin, light chain (Lca) (CLTA), transcript variant 1.                                  | hsa.miR.339.3p       | -0.026 | 6.59E-06 | 2.22E-02 | R-HSA-1280218~Adaptive Immune System             |

|        |          |                                                                                                                  |                |        |          |          |                                                                              |
|--------|----------|------------------------------------------------------------------------------------------------------------------|----------------|--------|----------|----------|------------------------------------------------------------------------------|
| 29093  | MRPL22   | mitochondrial ribosomal protein L22 (MRPL22), nuclear gene encoding mitochondrial protein, transcript variant 1. | hsa.miR.339.3p | -0.031 | 4.86E-06 | 2.22E-02 | R-HSA-392499~Metabolism of proteins                                          |
| 2995   | GYPC     | glycophorin C (Gerbich blood group) (GYPC), transcript variant 1.                                                | hsa.miR.339.3p | -0.038 | 1.70E-05 | 3.51E-02 | R-HSA-109582~Hemostasis                                                      |
| 84337  | ELOF1    | elongation factor 1 homolog (S. cerevisiae) (ELOF1).                                                             | hsa.miR.339.3p | -0.033 | 1.56E-05 | 3.51E-02 | Na                                                                           |
| 126328 | NDUFA11  | NADH dehydrogenase (ubiquinone) 1 alpha subcomplex, 11, 14.7kDa (NDUFA11).                                       | hsa.miR.339.3p | -0.03  | 2.09E-05 | 3.78E-02 | R-HSA-1428517~The citric acid (TCA) cycle and respiratory electron transport |
| 55658  | RNF126   | ring finger protein 126 (RNF126), transcript variant 1.                                                          | hsa.miR.339.3p | -0.029 | 3.55E-05 | 4.67E-02 | R-HSA-1280218~Adaptive Immune System                                         |
| 1978   | EIF4EBP1 | eukaryotic translation initiation factor 4E binding protein 1 (EIF4EBP1).                                        | hsa.miR.339.3p | -0.038 | 2.96E-05 | 4.67E-02 | R-HSA-165159~MTOR signalling                                                 |
| 10572  | SIVA1    | SIVA1, apoptosis-inducing factor (SIVA1), transcript variant 2.                                                  | hsa.miR.339.3p | -0.036 | 4.95E-05 | 5.50E-02 | Na                                                                           |
| 51719  | CAB39    | calcium binding protein 39 (CAB39).                                                                              | hsa.miR.339.3p | 0.022  | 6.43E-05 | 5.81E-02 | R-HSA-165159~MTOR signalling,R-HSA-168249~Innate Immune System               |
| 29093  | MRPL22   | mitochondrial ribosomal protein L22 (MRPL22), nuclear gene encoding mitochondrial protein, transcript variant 1. | hsa.miR.432.5p | -0.024 | 6.03E-05 | 5.81E-02 | R-HSA-392499~Metabolism of proteins                                          |
| 6789   | STK4     | serine/threonine kinase 4 (STK4).                                                                                | hsa.miR.339.3p | 0.022  | 9.58E-05 | 6.45E-02 | R-HSA-2028269~Signaling by Hippo                                             |
| 10856  | RUVBL2   | RuvB-like 2 (E. coli) (RUVBL2).                                                                                  | hsa.miR.339.3p | -0.022 | 9.82E-05 | 6.45E-02 | R-HSA-3214847~HATs acetylate histones                                        |

|        |           |                                                                                                              |                |        |          |          |                                                                    |
|--------|-----------|--------------------------------------------------------------------------------------------------------------|----------------|--------|----------|----------|--------------------------------------------------------------------|
| 27072  | VPS41     | vacuolar protein sorting 41 homolog (S. cerevisiae) (VPS41), transcript variant 2.                           | hsa.miR.339.3p | 0.019  | 9.04E-05 | 6.45E-02 | R-HSA-5663205~Infectious disease,R-HSA-9679506~SARS-CoV Infections |
| 25953  | PNKD      | paroxysmal nonkinesigenic dyskinesia (PNKD), transcript variant 1.                                           | hsa.miR.339.3p | -0.037 | 8.03E-05 | 6.45E-02 | Na                                                                 |
| 727877 | LOC727877 | PREDICTED: similar to Cyclin-L2 (Paneth cell-enhanced expression protein), transcript variant 2 (LOC727877). | hsa.miR.339.3p | -0.035 | 9.10E-05 | 6.45E-02 | Na                                                                 |
| 9470   | EIF4E2    | eukaryotic translation initiation factor 4E family member 2 (EIF4E2).                                        | hsa.miR.339.3p | -0.019 | 1.21E-04 | 7.30E-02 | R-HSA-1280215~Cytokine Signaling in Immune system                  |
| 29066  | ZC3H7A    | zinc finger CCCH-type containing 7A (ZC3H7A).                                                                | hsa.miR.339.3p | 0.021  | 1.19E-04 | 7.30E-02 | Na                                                                 |
| 1236   | CCR7      | chemokine (C-C motif) receptor 7 (CCR7).                                                                     | hsa.miR.432.5p | 0.068  | 1.27E-04 | 7.36E-02 | R-HSA-380108~Chemokine receptors bind chemokines                   |
| 54512  | EXOSC4    | exosome component 4 (EXOSC4).                                                                                | hsa.miR.339.3p | -0.026 | 1.53E-04 | 8.19E-02 | R-HSA-2262752~Cellular responses to stress                         |
| 23385  | NCSTN     | nicastrin (NCSTN).                                                                                           | hsa.miR.339.3p | 0.026  | 1.77E-04 | 8.97E-02 | R-HSA-168249~Innate Immune System,R-HSA-157118~Signaling by NOTCH  |
| 6182   | MRPL12    | mitochondrial ribosomal protein L12 (MRPL12), nuclear gene encoding mitochondrial protein.                   | hsa.miR.339.3p | -0.026 | 1.93E-04 | 9.30E-02 | R-HSA-392499~Metabolism of proteins                                |
| 727877 | LOC727877 | PREDICTED: similar to Cyclin-L2 (Paneth cell-enhanced expression protein), transcript variant 2 (LOC727877). | hsa.miR.432.5p | -0.029 | 2.05E-04 | 9.54E-02 | Na                                                                 |

Table S4. Details of genes from Black and Magenta modules.

| <b>IlluminaID</b> | <b>SYMBOL</b> | <b>Definition</b>                                                                                | <b>EntrezID</b> | <b>Module</b> |
|-------------------|---------------|--------------------------------------------------------------------------------------------------|-----------------|---------------|
| ILMN_1794386      | IL2RG         | interleukin 2 receptor, gamma (severe combined immunodeficiency) (IL2RG), mRNA.                  | 3561            | magenta       |
| ILMN_1651262      | HNRNPAB       | heterogeneous nuclear ribonucleoprotein A/B (HNRNPAB), transcript variant 1, mRNA.               | 3182            | black         |
| ILMN_1651987      | CCDC167       | chromosome 6 open reading frame 129 (C6orf129), mRNA.                                            | 154467          | black         |
| ILMN_1654016      | MYL12B        | myosin regulatory light chain MRLC2 (MRLC2), mRNA.                                               | 103910          | black         |
| ILMN_1654609      | EPB41L4A-AS1  | TIGA1 (TIGA1), mRNA.                                                                             | 114915          | black         |
| ILMN_1655046      | NUTF2         | nuclear transport factor 2 (NUTF2), mRNA.                                                        | 10204           | black         |
| ILMN_1655154      | PTBP1         | polypyrimidine tract binding protein 1 (PTBP1), transcript variant 2, mRNA.                      | 5725            | black         |
| ILMN_1655340      | RNF181        | hypothetical protein LOC51255 (LOC51255), mRNA.                                                  | 51255           | black         |
| ILMN_1656297      | YBEY          | chromosome 21 open reading frame 57 (C21orf57), transcript variant 1, mRNA.                      | 54059           | black         |
| ILMN_1656899      | CIB1          | calcium and integrin binding 1 (calmyrin) (CIB1), mRNA.                                          | 10519           | black         |
| ILMN_1658065      | EBP           | emopamil binding protein (sterol isomerase) (EBP), mRNA.                                         | 10682           | black         |
| ILMN_1658351      | FIS1          | fission 1 (mitochondrial outer membrane) homolog (S. cerevisiae) (FIS1), mRNA.                   | 51024           | black         |
| ILMN_1658486      | MRPL54        | mitochondrial ribosomal protein L54 (MRPL54), nuclear gene encoding mitochondrial protein, mRNA. | 116541          | black         |
| ILMN_1658802      | KRTCAP2       | keratinocyte associated protein 2 (KRTCAP2), mRNA.                                               | 200185          | black         |
| ILMN_1659343      | NA            | bolA homolog 2B (E. coli) (BOLA2B), mRNA.                                                        | 654483          | black         |
| ILMN_1659725      | EXOSC5        | exosome component 5 (EXOSC5), mRNA.                                                              | 56915           | black         |
| ILMN_1660436      | HSPA1B        | heat shock 70kDa protein 1B (HSPA1B), mRNA.                                                      | 3304            | black         |
| ILMN_1661347      | IMP4          | IMP4, U3 small nucleolar ribonucleoprotein, homolog (yeast) (IMP4), mRNA.                        | 92856           | black         |
| ILMN_1661490      | PFDN6         | prefoldin subunit 6 (PFDN6), mRNA.                                                               | 10471           | black         |
| ILMN_1661717      | TFDP1         | transcription factor Dp-1 (TFDP1), mRNA.                                                         | 7027            | black         |
| ILMN_1662417      | LRPPRC        | leucine-rich PPR-motif containing (LRPPRC), mRNA.                                                | 10128           | black         |
| ILMN_1663921      | TMEM141       | transmembrane protein 141 (TMEM141), mRNA.                                                       | 85014           | black         |



|              |          |                                                                                                                               |        |       |
|--------------|----------|-------------------------------------------------------------------------------------------------------------------------------|--------|-------|
| ILMN_1664010 | ELF1     | E74-like factor 1 (ets domain transcription factor) (ELF1), mRNA.                                                             | 1997   | black |
| ILMN_1664429 | ROMO1    | chromosome 20 open reading frame 52 (C20orf52), nuclear gene encoding mitochondrial protein, mRNA.                            | 140823 | black |
| ILMN_1664614 | FAU      | Finkel-Biskis-Reilly murine sarcoma virus (FBR-MuSV) ubiquitously expressed (fox derived); ribosomal protein S30 (FAU), mRNA. | 2197   | black |
| ILMN_1666326 | NDUFB9   | NADH dehydrogenase (ubiquinone) 1 beta subcomplex, 9, 22kDa (NDUFB9), mRNA.                                                   | 4715   | black |
| ILMN_1666471 | UQCRQ    | ubiquinol-cytochrome c reductase, complex III subunit VII, 9.5kDa (UQCRQ), nuclear gene encoding mitochondrial protein, mRNA. | 27089  | black |
| ILMN_1666967 | MPC1     | brain protein 44-like (BRP44L), mRNA.                                                                                         | 51660  | black |
| ILMN_1667050 | PRPS1    | phosphoribosyl pyrophosphate synthetase 1 (PRPS1), mRNA.                                                                      | 5631   | black |
| ILMN_1667257 | SDHB     | succinate dehydrogenase complex, subunit B, iron sulfur (Ip) (SDHB), mRNA.                                                    | 6390   | black |
| ILMN_1667716 | TMEM101  | transmembrane protein 101 (TMEM101), mRNA.                                                                                    | 84336  | black |
| ILMN_1669456 | NME3     | non-metastatic cells 3, protein expressed in (NME3), mRNA.                                                                    | 4832   | black |
| ILMN_1669550 | MAD2L2   | MAD2 mitotic arrest deficient-like 2 (yeast) (MAD2L2), mRNA.                                                                  | 10459  | black |
| ILMN_1670609 | ATOX1    | ATX1 antioxidant protein 1 homolog (yeast) (ATOX1), mRNA.                                                                     | 475    | black |
| ILMN_1670809 | NRM      | nurim (nuclear envelope membrane protein) (NRM), mRNA.                                                                        | 11270  | black |
| ILMN_1671237 | GNGT2    | guanine nucleotide binding protein (G protein), gamma transducing activity polypeptide 2 (GNGT2), mRNA.                       | 2793   | black |
| ILMN_1671374 | C19orf53 | chromosome 19 open reading frame 53 (C19orf53), mRNA.                                                                         | 28974  | black |
| ILMN_1672149 | CHCHD1   | coiled-coil-helix-coiled-coil-helix domain containing 1 (CHCHD1), mRNA.                                                       | 118487 | black |
| ILMN_1672389 | CRYZ     | crystallin, zeta (quinone reductase) (CRYZ), mRNA.                                                                            | 1429   | black |
| ILMN_1673323 | DPM3     | dolichyl-phosphate mannosyltransferase polypeptide 3 (DPM3), transcript variant 1, mRNA.                                      | 54344  | black |
| ILMN_1673991 | ATIC     | 5-aminoimidazole-4-carboxamide ribonucleotide formyltransferase/IMP cyclohydrolase (ATIC), mRNA.                              | 471    | black |

|              |         |                                                                                                                                                                                |        |       |
|--------------|---------|--------------------------------------------------------------------------------------------------------------------------------------------------------------------------------|--------|-------|
| ILMN_1674243 | TFRC    | transferrin receptor (p90, CD71) (TFRC), mRNA.                                                                                                                                 | 7037   | black |
| ILMN_1674609 | CLTB    | clathrin, light chain (Lcb) (CLTB), transcript variant 1, mRNA.                                                                                                                | 1212   | black |
| ILMN_1675239 | NDUFA7  | NADH dehydrogenase (ubiquinone) 1 alpha subcomplex, 7, 14.5kDa (NDUFA7), mRNA.                                                                                                 | 4701   | black |
| ILMN_1676393 | ATP5G1  | ATP synthase, H <sup>+</sup> transporting, mitochondrial F0 complex, subunit C1 (subunit 9) (ATP5G1), nuclear gene encoding mitochondrial protein, transcript variant 2, mRNA. | 516    | black |
| ILMN_1676611 | PHPT1   | phosphohistidine phosphatase 1 (PHPT1), mRNA.                                                                                                                                  | 29085  | black |
| ILMN_1678165 | LSM7    | LSM7 homolog, U6 small nuclear RNA associated ( <i>S. cerevisiae</i> ) (LSM7), mRNA.                                                                                           | 51690  | black |
| ILMN_1678308 | ATP6V1F | ATPase, H <sup>+</sup> transporting, lysosomal 14kDa, V1 subunit F (ATP6V1F), mRNA.                                                                                            | 9296   | black |
| ILMN_1679809 | GSTP1   | glutathione S-transferase pi (GSTP1), mRNA.                                                                                                                                    | 2950   | black |
| ILMN_1679841 | SIVA1   | SIVA1, apoptosis-inducing factor (SIVA1), transcript variant 1, mRNA.                                                                                                          | 10572  | black |
| ILMN_1680403 | SSR4    | signal sequence receptor, delta (translocon-associated protein delta) (SSR4), mRNA.                                                                                            | 6748   | black |
| ILMN_1681437 | DCXR    | dicarbonyl/L-xylulose reductase (DCXR), mRNA.                                                                                                                                  | 51181  | black |
| ILMN_1681617 | NA      | actin related protein 2/3 complex, subunit 3, 21kDa (ARPC3), mRNA.                                                                                                             | 10094  | black |
| ILMN_1682299 | NDUFA11 | NADH dehydrogenase (ubiquinone) 1 alpha subcomplex, 11, 14.7kDa (NDUFA11), mRNA.                                                                                               | 126328 | black |
| ILMN_1682316 | TRIM33  | tripartite motif-containing 33 (TRIM33), transcript variant a, mRNA.                                                                                                           | 51592  | black |
| ILMN_1682332 | GYPC    | glycophorin C (Gerbich blood group) (GYPC), transcript variant 1, mRNA.                                                                                                        | 2995   | black |
| ILMN_1683883 | NA      | aminoacylase 1 (ACY1), mRNA.                                                                                                                                                   | 95     | black |
| ILMN_1684446 | SPAG7   | sperm associated antigen 7 (SPAG7), mRNA.                                                                                                                                      | 9552   | black |
| ILMN_1685088 | RPL36   | ribosomal protein L36 (RPL36), transcript variant 1, mRNA.                                                                                                                     | 25873  | black |
| ILMN_1687359 | MRPS23  | mitochondrial ribosomal protein S23 (MRPS23), nuclear gene encoding mitochondrial protein, mRNA.                                                                               | 51649  | black |
| ILMN_1688318 | FRG1B   | similar to FRG1 protein (FSHD region gene 1 protein) (MGC72104), mRNA.                                                                                                         | 284802 | black |

|              |           |                                                                                                   |        |       |
|--------------|-----------|---------------------------------------------------------------------------------------------------|--------|-------|
| ILMN_1688702 | PJA2      | praja 2, RING-H2 motif containing (PJA2), mRNA.                                                   | 9867   | black |
| ILMN_1689389 | SF3B5     | splicing factor 3b, subunit 5, 10kDa (SF3B5), mRNA.                                               | 83443  | black |
| ILMN_1690217 | BFSP2     | beaded filament structural protein 2, phakinin (BFSP2), mRNA.                                     | 8419   | black |
| ILMN_1690802 | TRMT112   | hypothetical protein HSPC152 (HSPC152), mRNA.                                                     | 51504  | black |
| ILMN_1691379 | UBL5      | ubiquitin-like 5 (UBL5), transcript variant 1, mRNA.                                              | 59286  | black |
| ILMN_1692398 | CNTNAP1   | contactin associated protein 1 (CNTNAP1), mRNA.                                                   | 8506   | black |
| ILMN_1692486 | ZNRD1     | zinc ribbon domain containing 1 (ZNRD1), transcript variant a, mRNA.                              | 30834  | black |
| ILMN_1693227 | ZC3H7A    | zinc finger CCCH-type containing 7A (ZC3H7A), mRNA.                                               | 29066  | black |
| ILMN_1693685 | LINC00116 | PREDICTED: LOC205251 (LOC205251), misc RNA.                                                       | 205251 | black |
| ILMN_1696544 | EDF1      | endothelial differentiation-related factor 1 (EDF1), transcript variant alpha, mRNA.              | 8721   | black |
| ILMN_1696568 | ATP2C1    | ATPase, Ca++ transporting, type 2C, member 1 (ATP2C1), transcript variant 1, mRNA.                | 27032  | black |
| ILMN_1697820 | HINT2     | histidine triad nucleotide binding protein 2 (HINT2), mRNA.                                       | 84681  | black |
| ILMN_1698766 | PYCARD    | PYD and CARD domain containing (PYCARD), transcript variant 1, mRNA.                              | 29108  | black |
| ILMN_1700306 | OCIAD2    | OCIA domain containing 2 (OCIAD2), transcript variant 1, mRNA.                                    | 132299 | black |
| ILMN_1700419 | TMEM208   | HSPC171 protein (HSPC171), mRNA.                                                                  | 29100  | black |
| ILMN_1700955 | TCTEX1D2  | hypothetical protein MGC33212 (MGC33212), mRNA.                                                   | 255758 | black |
| ILMN_1701134 | PTEN      | phosphatase and tensin homolog (mutated in multiple advanced cancers 1) (PTEN), mRNA.             | 5728   | black |
| ILMN_1702059 | RPS19BP1  | ribosomal protein S19 binding protein 1 (RPS19BP1), mRNA.                                         | 91582  | black |
| ILMN_1702828 | CHMP4A    | chromatin modifying protein 4A (CHMP4A), mRNA.                                                    | 29082  | black |
| ILMN_1703697 | LANCL1    | LanC lantibiotic synthetase component C-like 1 (bacterial) (LANCL1), mRNA.                        | 10314  | black |
| ILMN_1704024 | TMEM160   | transmembrane protein 160 (TMEM160), mRNA.                                                        | 54958  | black |
| ILMN_1704404 | PSMD13    | proteasome (prosome, macropain) 26S subunit, non-ATPase, 13 (PSMD13), transcript variant 1, mRNA. | 5719   | black |
| ILMN_1704785 | FUOM      | chromosome 10 open reading frame 125 (C10orf125), mRNA.                                           | 282969 | black |

|              |         |                                                                                                                         |        |       |
|--------------|---------|-------------------------------------------------------------------------------------------------------------------------|--------|-------|
| ILMN_1704891 | SMARCD2 | SWI/SNF related, matrix associated, actin dependent regulator of chromatin, subfamily d, member 2 (SMARCD2), mRNA.      | 6603   | black |
| ILMN_1705464 | MRPL41  | mitochondrial ribosomal protein L41 (MRPL41), nuclear gene encoding mitochondrial protein, mRNA.                        | 64975  | black |
| ILMN_1707783 | TMA7    | coiled-coil domain containing 72 (CCDC72), mRNA.                                                                        | 51372  | black |
| ILMN_1707810 | RPS5    | ribosomal protein S5 (RPS5), mRNA.                                                                                      | 6193   | black |
| ILMN_1708151 | LAGE3   | L antigen family, member 3 (LAGE3), mRNA.                                                                               | 8270   | black |
| ILMN_1709451 | TFPT    | TCF3 (E2A) fusion partner (in childhood Leukemia) (TFPT), mRNA.                                                         | 29844  | black |
| ILMN_1709626 | IFI27L1 | family with sequence similarity 14, member B (FAM14B), mRNA.                                                            | 122509 | black |
| ILMN_1710758 | RNF20   | ring finger protein 20 (RNF20), mRNA.                                                                                   | 56254  | black |
| ILMN_1710873 | ZNF330  | zinc finger protein 330 (ZNF330), mRNA.                                                                                 | 27309  | black |
| ILMN_1710979 | ANKRD39 | ankyrin repeat domain 39 (ANKRD39), mRNA.                                                                               | 51239  | black |
| ILMN_1711617 | GMFG    | glia maturation factor, gamma (GMFG), mRNA.                                                                             | 9535   | black |
| ILMN_1711810 | PNKD    | paroxysmal nonkinesiogetic dyskinesia (PNKD), transcript variant 1, mRNA.                                               | 25953  | black |
| ILMN_1714495 | NDUFB2  | NADH dehydrogenase (ubiquinone) 1 beta subcomplex, 2, 8kDa (NDUFB2), nuclear gene encoding mitochondrial protein, mRNA. | 4708   | black |
| ILMN_1715324 | HSD17B8 | hydroxysteroid (17-beta) dehydrogenase 8 (HSD17B8), mRNA.                                                               | 7923   | black |
| ILMN_1716093 | KRT10   | keratin 10 (epidermolytic hyperkeratosis; keratosis palmaris et plantaris) (KRT10), mRNA.                               | 3858   | black |
| ILMN_1716169 | MIF     | macrophage migration inhibitory factor (glycosylation-inhibiting factor) (MIF), mRNA.                                   | 4282   | black |
| ILMN_1716733 | MYOM2   | myomesin (M-protein) 2, 165kDa (MYOM2), mRNA.                                                                           | 9172   | black |
| ILMN_1716913 | TRAPPC1 | trafficking protein particle complex 1 (TRAPPC1), mRNA.                                                                 | 58485  | black |
| ILMN_1717714 | CDKN2A  | cyclin-dependent kinase inhibitor 2A (melanoma, p16, inhibits CDK4) (CDKN2A), transcript variant 1, mRNA.               | 1029   | black |
| ILMN_1718672 | NHP2    | nucleolar protein family A, member 2 (H/ACA small nucleolar RNPs) (NOLA2), transcript variant 1, mRNA.                  | 55651  | black |

|              |         |                                                                                                                                                       |        |       |
|--------------|---------|-------------------------------------------------------------------------------------------------------------------------------------------------------|--------|-------|
| ILMN_1720422 | G3BP2   | GTPase activating protein (SH3 domain) binding protein 2 (G3BP2), transcript variant 1, mRNA.                                                         | 9908   | black |
| ILMN_1720442 | NCBP2   | nuclear cap binding protein subunit 2, 20kDa (NCBP2), transcript variant 2, mRNA.                                                                     | 22916  | black |
| ILMN_1720542 | POLR2I  | polymerase (RNA) II (DNA directed) polypeptide I, 14.5kDa (POLR2I), mRNA.                                                                             | 5438   | black |
| ILMN_1721977 | NAA10   | ARD1 homolog A, N-acetyltransferase ( <i>S. cerevisiae</i> ) (ARD1A), mRNA.                                                                           | 8260   | black |
| ILMN_1722102 | ANAPC11 | APC11 anaphase promoting complex subunit 11 homolog (yeast) (ANAPC11), transcript variant 1, mRNA.                                                    | 51529  | black |
| ILMN_1722491 | APRT    | adenine phosphoribosyltransferase (APRT), transcript variant 1, mRNA.                                                                                 | 353    | black |
| ILMN_1722905 | MRPS11  | mitochondrial ribosomal protein S11 (MRPS11), nuclear gene encoding mitochondrial protein, transcript variant 1, mRNA.                                | 64963  | black |
| ILMN_1723580 | RBMX    | RNA binding motif protein, X-linked (RBMX), mRNA.                                                                                                     | 27316  | black |
| ILMN_1724700 | RIOK3   | RIO kinase 3 (yeast) (RIOK3), transcript variant 2, mRNA.                                                                                             | 8780   | black |
| ILMN_1725241 | GSTK1   | glutathione S-transferase kappa 1 (GSTK1), mRNA.                                                                                                      | 373156 | black |
| ILMN_1725366 | SLC27A5 | solute carrier family 27 (fatty acid transporter), member 5 (SLC27A5), mRNA.                                                                          | 10998  | black |
| ILMN_1725705 | CLPP    | ClpP caseinolytic peptidase, ATP-dependent, proteolytic subunit homolog ( <i>E. coli</i> ) (CLPP), nuclear gene encoding mitochondrial protein, mRNA. | 8192   | black |
| ILMN_1726603 | ATP5I   | ATP synthase, H <sup>+</sup> transporting, mitochondrial F0 complex, subunit E (ATP5I), nuclear gene encoding mitochondrial protein, mRNA.            | 521    | black |
| ILMN_1726884 | NARF    | nuclear prelamin A recognition factor (NARF), transcript variant 1, mRNA.                                                                             | 26502  | black |
| ILMN_1727004 | MRPL14  | mitochondrial ribosomal protein L14 (MRPL14), nuclear gene encoding mitochondrial protein, mRNA.                                                      | 64928  | black |
| ILMN_1727740 | SYNCRIP | synaptotagmin binding, cytoplasmic RNA interacting protein (SYNCRIP), mRNA.                                                                           | 10492  | black |
| ILMN_1730391 | MRPS18A | mitochondrial ribosomal protein S18A (MRPS18A), nuclear gene encoding mitochondrial protein, mRNA.                                                    | 55168  | black |

|              |         |                                                                                                                 |        |       |
|--------------|---------|-----------------------------------------------------------------------------------------------------------------|--------|-------|
| ILMN_1730433 | CD2AP   | CD2-associated protein (CD2AP), mRNA.                                                                           | 23607  | black |
| ILMN_1732555 | B4GALT6 | UDP-Gal:betaGlcNAc beta 1,4-galactosyltransferase, polypeptide 6 (B4GALT6), mRNA.                               | 9331   | black |
| ILMN_1732750 | COA4    | coiled-coil-helix-coiled-coil-helix domain containing 8 (CHCHD8), mRNA.                                         | 51287  | black |
| ILMN_1732985 | PHF20L1 | PHD finger protein 20-like 1 (PHF20L1), transcript variant 1, mRNA.                                             | 51105  | black |
| ILMN_1733927 | TCEB2   | transcription elongation factor B (SIII), polypeptide 2 (18kDa, elongin B) (TCEB2), transcript variant 2, mRNA. | 6923   | black |
| ILMN_1733956 | IARS    | isoleucyl-tRNA synthetase (IARS), transcript variant short, mRNA.                                               | 3376   | black |
| ILMN_1733960 | NAA38   | LSM domain containing 1 (LSMD1), mRNA.                                                                          | 84316  | black |
| ILMN_1735909 | TRPT1   | tRNA phosphotransferase 1 (TRPT1), transcript variant 1, mRNA.                                                  | 83707  | black |
| ILMN_1736389 | SEC61B  | Sec61 beta subunit (SEC61B), mRNA.                                                                              | 10952  | black |
| ILMN_1736752 | COMTD1  | catechol-O-methyltransferase domain containing 1 (COMTD1), mRNA.                                                | 118881 | black |
| ILMN_1737236 | COX5B   | cytochrome c oxidase subunit Vb (COX5B), mRNA.                                                                  | 1329   | black |
| ILMN_1737358 | TMEM256 | chromosome 17 open reading frame 61 (C17orf61), mRNA.                                                           | 254863 | black |
| ILMN_1738326 | EIF4E2  | eukaryotic translation initiation factor 4E family member 2 (EIF4E2), mRNA.                                     | 9470   | black |
| ILMN_1738529 | BCS1L   | BCS1-like (yeast) (BCS1L), nuclear gene encoding mitochondrial protein, transcript variant 2, mRNA.             | 617    | black |
| ILMN_1738938 | TIMM8B  | translocase of inner mitochondrial membrane 8 homolog B (yeast) (TIMM8B), mRNA.                                 | 26521  | black |
| ILMN_1739345 | LBHD1   | chromosome 11 open reading frame 48 (C11orf48), mRNA.                                                           | 79081  | black |
| ILMN_1740319 | IFI27L2 | family with sequence similarity 14, member A (FAM14A), mRNA.                                                    | 83982  | black |
| ILMN_1741491 | ZNHIT1  | zinc finger, HIT type 1 (ZNHIT1), mRNA.                                                                         | 10467  | black |
| ILMN_1743049 | PWP1    | PWP1 homolog (S. cerevisiae) (PWP1), mRNA.                                                                      | 11137  | black |
| ILMN_1743711 | XPOT    | PREDICTED: similar to Exportin-T (tRNA exportin) (Exportin(tRNA)) (LOC441228), mRNA.                            | 441228 | black |
| ILMN_1744604 | CYBA    | cytochrome b-245, alpha polypeptide (CYBA), mRNA.                                                               | 1535   | black |

|              |         |                                                                                                                                                                    |        |       |
|--------------|---------|--------------------------------------------------------------------------------------------------------------------------------------------------------------------|--------|-------|
| ILMN_1744628 | FDX1L   | similar to RIKEN cDNA B230118G17 gene (MGC19604), transcript variant 1, mRNA.                                                                                      | 112812 | black |
| ILMN_1744647 | CAND1   | cullin-associated and neddylation-dissociated 1 (CAND1), mRNA.                                                                                                     | 55832  | black |
| ILMN_1745053 | MSRB2   | methionine sulfoxide reductase B2 (MSRB2), mRNA.                                                                                                                   | 22921  | black |
| ILMN_1745885 | POLR2F  | polymerase (RNA) II (DNA directed) polypeptide F (POLR2F), mRNA.                                                                                                   | 5435   | black |
| ILMN_1746175 | TNFSF4  | tumor necrosis factor (ligand) superfamily, member 4 (tax-transcriptionally activated glycoprotein 1, 34kDa) (TNFSF4), mRNA.                                       | 7292   | black |
| ILMN_1746241 | SDHC    | succinate dehydrogenase complex, subunit C, integral membrane protein, 15kDa (SDHC), nuclear gene encoding mitochondrial protein, mRNA.                            | 6391   | black |
| ILMN_1746408 | MIDN    | midnolin (MIDN), mRNA.                                                                                                                                             | 90007  | black |
| ILMN_1746598 | NA      | sodium channel modifier 1 (SCNM1), transcript variant 2, mRNA.                                                                                                     | 79005  | black |
| ILMN_1747195 | PSMB8   | proteasome (prosome, macropain) subunit, beta type, 8 (large multifunctional peptidase 7) (PSMB8), transcript variant 2, mRNA.                                     | 5696   | black |
| ILMN_1747935 | GOLGB1  | golgi autoantigen, golgin subfamily b, macrogolgin (with transmembrane signal), 1 (GOLGB1), mRNA.                                                                  | 2804   | black |
| ILMN_1749014 | ACLY    | ATP citrate lyase (ACLY), transcript variant 1, mRNA.                                                                                                              | 47     | black |
| ILMN_1749662 | GPX1    | glutathione peroxidase 1 (GPX1), transcript variant 1, mRNA.                                                                                                       | 2876   | black |
| ILMN_1749709 | NDUFB11 | NADH dehydrogenase (ubiquinone) 1 beta subcomplex, 11, 17.3kDa (NDUFB11), mRNA.                                                                                    | 54539  | black |
| ILMN_1750143 | ATP5J2  | ATP synthase, H <sup>+</sup> transporting, mitochondrial F0 complex, subunit F2 (ATP5J2), nuclear gene encoding mitochondrial protein, transcript variant 3, mRNA. | 9551   | black |
| ILMN_1750658 | HAX1    | HCLS1 associated protein X-1 (HAX1), transcript variant 2, mRNA.                                                                                                   | 10456  | black |
| ILMN_1751368 | HNRNPD  | heterogeneous nuclear ribonucleoprotein D (AU-rich element RNA binding protein 1, 37kDa) (HNRNPD), transcript variant 4, mRNA.                                     | 3184   | black |
| ILMN_1751743 | XRCC1   | X-ray repair complementing defective repair in Chinese hamster cells 1 (XRCC1), mRNA.                                                                              | 7515   | black |

|              |          |                                                                                                                                                                               |        |       |
|--------------|----------|-------------------------------------------------------------------------------------------------------------------------------------------------------------------------------|--------|-------|
| ILMN_1752340 | ARF5     | ADP-ribosylation factor 5 (ARF5), mRNA.                                                                                                                                       | 381    | black |
| ILMN_1752631 | CGGBP1   | CGG triplet repeat binding protein 1 (CGGBP1), transcript variant 1, mRNA.                                                                                                    | 8545   | black |
| ILMN_1753393 | OSGEP    | O-sialoglycoprotein endopeptidase (OSGEP), mRNA.                                                                                                                              | 55644  | black |
| ILMN_1753862 | SRP54    | signal recognition particle 54kDa (SRP54), mRNA.                                                                                                                              | 6729   | black |
| ILMN_1754544 | PSMA7    | proteasome (prosome, macropain) subunit, alpha type, 7 (PSMA7), mRNA.                                                                                                         | 5688   | black |
| ILMN_1756352 | LAMTOR2  | mitogen-activated protein-binding protein-interacting protein (MAPBPIP), mRNA.                                                                                                | 28956  | black |
| ILMN_1757914 | WDR83OS  | chromosome 19 open reading frame 56 (C19orf56), mRNA.                                                                                                                         | 51398  | black |
| ILMN_1758398 | GUK1     | guanylate kinase 1 (GUK1), mRNA.                                                                                                                                              | 2987   | black |
| ILMN_1759184 | C19orf48 | chromosome 19 open reading frame 48 (C19orf48), mRNA.                                                                                                                         | 84798  | black |
| ILMN_1760027 | WAS      | Wiskott-Aldrich syndrome (eczema-thrombocytopenia) (WAS), mRNA.                                                                                                               | 7454   | black |
| ILMN_1760849 | NETO2    | neuropilin (NRP) and tolloid (TLL)-like 2 (NETO2), mRNA.                                                                                                                      | 81831  | black |
| ILMN_1761147 | GABPB1   | GA binding protein transcription factor, beta subunit 2 (GABPB2), transcript variant gamma-2, mRNA.                                                                           | 2553   | black |
| ILMN_1761242 | COMMD1   | copper metabolism (Murr1) domain containing 1 (COMMD1), mRNA.                                                                                                                 | 150684 | black |
| ILMN_1761728 | ACP5     | acid phosphatase 5, tartrate resistant (ACP5), mRNA.                                                                                                                          | 54     | black |
| ILMN_1762281 | DCTN3    | dynactin 3 (p22) (DCTN3), transcript variant 1, mRNA.                                                                                                                         | 11258  | black |
| ILMN_1762654 | PAFAH1B3 | platelet-activating factor acetylhydrolase, isoform Ib, gamma subunit 29kDa (PAFAH1B3), mRNA.                                                                                 | 5050   | black |
| ILMN_1763147 | NDUFB6   | NADH dehydrogenase (ubiquinone) 1 beta subcomplex, 6, 17kDa (NDUFB6), nuclear gene encoding mitochondrial protein, transcript variant 2, mRNA.                                | 4712   | black |
| ILMN_1763379 | NA       | kelch-like 23 (Drosophila) (KLHL23), mRNA.                                                                                                                                    | 151230 | black |
| ILMN_1763884 | NA       | mitochondria-associated protein involved in granulocyte-macrophage colony-stimulating factor signal transduction (Magmas), nuclear gene encoding mitochondrial protein, mRNA. | 51025  | black |
| ILMN_1764230 | GNPTG    | N-acetylglucosamine-1-phosphate transferase, gamma subunit (GNPTG), mRNA.                                                                                                     | 84572  | black |



|              |          |                                                                                                                                           |        |       |
|--------------|----------|-------------------------------------------------------------------------------------------------------------------------------------------|--------|-------|
| ILMN_1765684 | C19orf70 | hypothetical protein P117 (P117), mRNA.                                                                                                   | 125988 | black |
| ILMN_1765858 | CAB39    | calcium binding protein 39 (CAB39), mRNA.                                                                                                 | 51719  | black |
| ILMN_1767123 | NDUFA2   | NADH dehydrogenase (ubiquinone) 1 alpha subcomplex, 2, 8kDa (NDUFA2), mRNA.                                                               | 4695   | black |
| ILMN_1767139 | NDUFA13  | NADH dehydrogenase (ubiquinone) 1 alpha subcomplex, 13 (NDUFA13), mRNA.                                                                   | 51079  | black |
| ILMN_1767549 | BLOC1S1  | biogenesis of lysosome-related organelles complex-1, subunit 1 (BLOC1S1), mRNA.                                                           | 2647   | black |
| ILMN_1768197 | PTBP3    | ROD1 regulator of differentiation 1 (S. pombe) (ROD1), mRNA.                                                                              | 9991   | black |
| ILMN_1768712 | NUDT8    | nudix (nucleoside diphosphate linked moiety X)-type motif 8 (NUDT8), mRNA.                                                                | 254552 | black |
| ILMN_1769343 | DNPH1    | chromosome 6 open reading frame 108 (C6orf108), transcript variant 1, mRNA.                                                               | 10591  | black |
| ILMN_1770885 | COX17    | COX17 cytochrome c oxidase assembly homolog (S. cerevisiae) (COX17), nuclear gene encoding mitochondrial protein, mRNA.                   | 10063  | black |
| ILMN_1771003 | HAUS4    | chromosome 14 open reading frame 94 (C14orf94), mRNA.                                                                                     | 54930  | black |
| ILMN_1771019 | MTMR4    | myotubularin related protein 4 (MTMR4), mRNA.                                                                                             | 9110   | black |
| ILMN_1771734 | GMPS     | guanine monphosphate synthetase (GMPS), mRNA.                                                                                             | 8833   | black |
| ILMN_1772796 | DYNLL2   | dynein, light chain, LC8-type 2 (DYNLL2), mRNA.                                                                                           | 140735 | black |
| ILMN_1772981 | EPN1     | epsin 1 (EPN1), mRNA.                                                                                                                     | 29924  | black |
| ILMN_1773751 | HRAS     | v-Ha-ras Harvey rat sarcoma viral oncogene homolog (HRAS), transcript variant 1, mRNA.                                                    | 3265   | black |
| ILMN_1773760 | PAICS    | phosphoribosylaminoimidazole carboxylase, phosphoribosylaminoimidazole succinocarboxamide synthetase (PAICS), transcript variant 3, mRNA. | 10606  | black |
| ILMN_1773780 | FAM173A  | chromosome 16 open reading frame 24 (C16orf24), mRNA.                                                                                     | 65990  | black |
| ILMN_1774334 | HIGD2A   | HIG1 domain family, member 2A (HIGD2A), mRNA.                                                                                             | 192286 | black |
| ILMN_1774890 | LAS1L    | LAS1-like (S. cerevisiae) (LAS1L), mRNA.                                                                                                  | 81887  | black |

|              |          |                                                                                                                        |        |       |
|--------------|----------|------------------------------------------------------------------------------------------------------------------------|--------|-------|
| ILMN_1774990 | C16orf13 | hypothetical protein MGC13114 (MGC13114), transcript variant 7, mRNA.                                                  | 84326  | black |
| ILMN_1775243 | RPL35    | PREDICTED: similar to 60S ribosomal protein L35, transcript variant 5 (LOC441246), mRNA.                               | 441246 | black |
| ILMN_1775672 | SOD2     | superoxide dismutase 2, mitochondrial (SOD2), nuclear gene encoding mitochondrial protein, transcript variant 2, mRNA. | 6648   | black |
| ILMN_1777721 | MAPRE1   | microtubule-associated protein, RP/EB family, member 1 (MAPRE1), mRNA.                                                 | 22919  | black |
| ILMN_1777991 | DYRK4    | dual-specificity tyrosine-(Y)-phosphorylation regulated kinase 4 (DYRK4), mRNA.                                        | 8798   | black |
| ILMN_1778347 | NUDT2    | nudix (nucleoside diphosphate linked moiety X)-type motif 2 (NUDT2), transcript variant 2, mRNA.                       | 318    | black |
| ILMN_1779735 | LAMTOR4  | similar to CG14977-PA (LOC389541), mRNA.                                                                               | 389541 | black |
| ILMN_1779751 | C7orf55  | hypothetical protein HSPC268 (HSPC268), mRNA.                                                                          | 154791 | black |
| ILMN_1779813 | FAM96B   | family with sequence similarity 96, member B (FAM96B), mRNA.                                                           | 51647  | black |
| ILMN_1780127 | MRPS34   | mitochondrial ribosomal protein S34 (MRPS34), nuclear gene encoding mitochondrial protein, mRNA.                       | 65993  | black |
| ILMN_1780533 | RNASE6   | ribonuclease, RNase A family, k6 (RNASE6), mRNA.                                                                       | 6039   | black |
| ILMN_1780977 | PVRIG    | poliovirus receptor related immunoglobulin domain containing (PVRIG), mRNA.                                            | 79037  | black |
| ILMN_1781290 | RHOA     | ras homolog gene family, member A (RHOA), mRNA.                                                                        | 387    | black |
| ILMN_1781638 | HDDC3    | HD domain containing 3 (HDDC3), mRNA.                                                                                  | 374659 | black |
| ILMN_1781986 | UQCR10   | ubiquinol-cytochrome c reductase complex (7.2 kD) (UCRC), transcript variant 2, mRNA.                                  | 29796  | black |
| ILMN_1783636 | COX6A1   | cytochrome c oxidase subunit VIa polypeptide 1 (COX6A1), nuclear gene encoding mitochondrial protein, mRNA.            | 1337   | black |
| ILMN_1783681 | MRPL34   | mitochondrial ribosomal protein L34 (MRPL34), nuclear gene encoding mitochondrial protein, mRNA.                       | 64981  | black |
| ILMN_1783843 | MIIP     | invasion inhibitory protein 45 (IIP45), transcript variant 1, mRNA.                                                    | 60672  | black |

|              |          |                                                                                                                             |        |       |
|--------------|----------|-----------------------------------------------------------------------------------------------------------------------------|--------|-------|
| ILMN_1784641 | NDUFA3   | NADH dehydrogenase (ubiquinone) 1 alpha subcomplex, 3, 9kDa (NDUFA3), mRNA.                                                 | 4696   | black |
| ILMN_1785175 | SWAP70   | SWAP-70 protein (SWAP70), mRNA.                                                                                             | 23075  | black |
| ILMN_1785570 | SUSD3    | sushi domain containing 3 (SUSD3), mRNA.                                                                                    | 203328 | black |
| ILMN_1787705 | ATP6V1B2 | ATPase, H <sup>+</sup> transporting, lysosomal 56/58kDa, V1 subunit B2 (ATP6V1B2), mRNA.                                    | 526    | black |
| ILMN_1788547 | GCLM     | glutamate-cysteine ligase, modifier subunit (GCLM), mRNA.                                                                   | 2730   | black |
| ILMN_1789074 | HSPA1A   | heat shock 70kDa protein 1A (HSPA1A), mRNA.                                                                                 | 3303   | black |
| ILMN_1789136 | NA       | small EDRK-rich factor 2 (SERF2), mRNA.                                                                                     | 10169  | black |
| ILMN_1789614 | TPT1     | tumor protein, translationally-controlled 1 (TPT1), mRNA.                                                                   | 7178   | black |
| ILMN_1790461 | UQCC2    | chromosome 6 open reading frame 125 (C6orf125), mRNA.                                                                       | 84300  | black |
| ILMN_1794230 | SCAND1   | SCAN domain containing 1 (SCAND1), transcript variant 1, mRNA.                                                              | 51282  | black |
| ILMN_1794522 | EIF5A    | eukaryotic translation initiation factor 5A (EIF5A), mRNA.                                                                  | 1984   | black |
| ILMN_1795341 | SRSF1    | splicing factor, arginine/serine-rich 1 (splicing factor 2, alternate splicing factor) (SFRS1), transcript variant 2, mRNA. | 6426   | black |
| ILMN_1795639 | MGMT     | O-6-methylguanine-DNA methyltransferase (MGMT), mRNA.                                                                       | 4255   | black |
| ILMN_1796595 | C5orf22  | chromosome 5 open reading frame 22 (C5orf22), mRNA.                                                                         | 55322  | black |
| ILMN_1797530 | CHCHD5   | coiled-coil-helix-coiled-coil-helix domain containing 5 (CHCHD5), mRNA.                                                     | 84269  | black |
| ILMN_1797828 | DDRGK1   | chromosome 20 open reading frame 116 (C20orf116), mRNA.                                                                     | 65992  | black |
| ILMN_1798827 | SRBD1    | S1 RNA binding domain 1 (SRBD1), mRNA.                                                                                      | 55133  | black |
| ILMN_1798886 | NUDT21   | nudix (nucleoside diphosphate linked moiety X)-type motif 21 (NUDT21), mRNA.                                                | 11051  | black |
| ILMN_1799015 | PXMP2    | peroxisomal membrane protein 2, 22kDa (PXMP2), mRNA.                                                                        | 5827   | black |
| ILMN_1800197 | MRPL36   | mitochondrial ribosomal protein L36 (MRPL36), nuclear gene encoding mitochondrial protein, mRNA.                            | 64979  | black |
| ILMN_1800602 | GCA      | grancalcin, EF-hand calcium binding protein (GCA), mRNA.                                                                    | 25801  | black |

|              |          |                                                                                                                                            |        |       |
|--------------|----------|--------------------------------------------------------------------------------------------------------------------------------------------|--------|-------|
| ILMN_1801119 | BCL2     | B-cell CLL/lymphoma 2 (BCL2), nuclear gene encoding mitochondrial protein, transcript variant alpha, mRNA.                                 | 596    | black |
| ILMN_1802553 | NA       | mitochondrial ribosomal protein S24 (MRPS24), nuclear gene encoding mitochondrial protein, mRNA.                                           | 64951  | black |
| ILMN_1802627 | PSMG3    | chromosome 7 open reading frame 48 (C7orf48), mRNA.                                                                                        | 84262  | black |
| ILMN_1804248 | FDPS     | farnesyl diphosphate synthase (farnesyl pyrophosphate synthetase, dimethylallyltranstransferase, geranyltranstransferase) (FDPS), mRNA.    | 2224   | black |
| ILMN_1804656 | COX14    | chromosome 12 open reading frame 62 (C12orf62), mRNA.                                                                                      | 84987  | black |
| ILMN_1804679 | KAT8     | MYST histone acetyltransferase 1 (MYST1), mRNA.                                                                                            | 84148  | black |
| ILMN_1805922 | EBPL     | emopamil binding protein-like (EBPL), mRNA.                                                                                                | 84650  | black |
| ILMN_1806123 | MRPL23   | mitochondrial ribosomal protein L23 (MRPL23), nuclear gene encoding mitochondrial protein, mRNA.                                           | 6150   | black |
| ILMN_1807240 | RPS9     | ribosomal protein S9 (RPS9), mRNA.                                                                                                         | 6203   | black |
| ILMN_1808196 | GSTO1    | glutathione S-transferase omega 1 (GSTO1), mRNA.                                                                                           | 9446   | black |
| ILMN_1809013 | MYL6     | myosin, light chain 6, alkali, smooth muscle and non-muscle (MYL6), transcript variant 2, mRNA.                                            | 4637   | black |
| ILMN_1809495 | COX8A    | cytochrome c oxidase subunit 8A (ubiquitous) (COX8A), mRNA.                                                                                | 1351   | black |
| ILMN_1810625 | UFC1     | ubiquitin-fold modifier conjugating enzyme 1 (UFC1), mRNA.                                                                                 | 51506  | black |
| ILMN_1810680 | NA       | bolA homolog 2 (E. coli) (BOLA2), transcript variant 2, mRNA.                                                                              | 552900 | black |
| ILMN_1810901 | RNASEH2A | ribonuclease H2, subunit A (RNASEH2A), mRNA.                                                                                               | 10535  | black |
| ILMN_1811327 | MRPL27   | mitochondrial ribosomal protein L27 (MRPL27), nuclear gene encoding mitochondrial protein, transcript variant 1, mRNA.                     | 51264  | black |
| ILMN_1812638 | ATP5L    | ATP synthase, H <sup>+</sup> transporting, mitochondrial F0 complex, subunit G (ATP5L), nuclear gene encoding mitochondrial protein, mRNA. | 10632  | black |
| ILMN_1813260 | TIMM17B  | translocase of inner mitochondrial membrane 17 homolog B (yeast) (TIMM17B), mRNA.                                                          | 10245  | black |

|              |         |                                                                                                                                                                      |        |         |
|--------------|---------|----------------------------------------------------------------------------------------------------------------------------------------------------------------------|--------|---------|
| ILMN_1813604 | NDUFB7  | NADH dehydrogenase (ubiquinone) 1 beta subcomplex, 7, 18kDa (NDUFB7), nuclear gene encoding mitochondrial protein, mRNA.                                             | 4713   | black   |
| ILMN_1813682 | MRPL53  | mitochondrial ribosomal protein L53 (MRPL53), nuclear gene encoding mitochondrial protein, mRNA.                                                                     | 116540 | black   |
| ILMN_1813817 | MRPL55  | mitochondrial ribosomal protein L55 (MRPL55), nuclear gene encoding mitochondrial protein, transcript variant 8, mRNA.                                               | 128308 | black   |
| ILMN_1815024 | PRDX5   | peroxiredoxin 5 (PRDX5), nuclear gene encoding mitochondrial protein, transcript variant 1, mRNA.                                                                    | 25824  | black   |
| ILMN_1815115 | CYC1    | cytochrome c-1 (CYC1), mRNA.                                                                                                                                         | 1537   | black   |
| ILMN_1815134 | PI4K2B  | phosphatidylinositol 4-kinase type 2 beta (PI4K2B), mRNA.                                                                                                            | 55300  | black   |
| ILMN_1815479 | NOP10   | nucleolar protein family A, member 3 (H/ACA small nucleolar RNPs) (NOLA3), mRNA.                                                                                     | 55505  | black   |
| ILMN_1815689 | CD46    | CD46 molecule, complement regulatory protein (CD46), transcript variant d, mRNA.                                                                                     | 4179   | black   |
| ILMN_1343294 | ACTB    | actin, beta (ACTB), mRNA.                                                                                                                                            | 60     | magenta |
| ILMN_1652478 | NA      | NODAL modulator 2 (NOMO2), transcript variant 2, mRNA.                                                                                                               | 283820 | magenta |
| ILMN_1652918 | RHOF    | ras homolog gene family, member F (in filopodia) (RHOF), mRNA.                                                                                                       | 54509  | magenta |
| ILMN_1653599 | ATP5D   | ATP synthase, H <sup>+</sup> transporting, mitochondrial F1 complex, delta subunit (ATP5D), nuclear gene encoding mitochondrial protein, transcript variant 2, mRNA. | 513    | magenta |
| ILMN_1656111 | MYLIP   | myosin regulatory light chain interacting protein (MYLIP), mRNA.                                                                                                     | 29116  | magenta |
| ILMN_1656540 | RUUBL1  | RuvB-like 1 (E. coli) (RUUBL1), mRNA.                                                                                                                                | 8607   | magenta |
| ILMN_1657550 | MVD     | mevalonate (diphospho) decarboxylase (MVD), mRNA.                                                                                                                    | 4597   | magenta |
| ILMN_1657898 | MTFP1   | mitochondrial protein 18 kDa (MTP18), nuclear gene encoding mitochondrial protein, transcript variant 1, mRNA.                                                       | 51537  | magenta |
| ILMN_1657983 | TERF2IP | telomeric repeat binding factor 2, interacting protein (TERF2IP), mRNA.                                                                                              | 54386  | magenta |
| ILMN_1658003 | YIF1B   | Yip1 interacting factor homolog B (S. cerevisiae) (YIF1B), transcript variant 3, mRNA.                                                                               | 90522  | magenta |
| ILMN_1658456 | SNX19   | sorting nexin 19 (SNX19), mRNA.                                                                                                                                      | 399979 | magenta |

|              |         |                                                                                                  |        |         |
|--------------|---------|--------------------------------------------------------------------------------------------------|--------|---------|
| ILMN_1658472 | APH1A   | anterior pharynx defective 1 homolog A (C. elegans) (APH1A), transcript variant 2, mRNA.         | 51107  | magenta |
| ILMN_1658678 | SAAL1   | serum amyloid A-like 1 (SAAL1), mRNA.                                                            | 113174 | magenta |
| ILMN_1658928 | GNB2    | guanine nucleotide binding protein (G protein), beta polypeptide 2 (GNB2), mRNA.                 | 2783   | magenta |
| ILMN_1659270 | OTP     | orthopedia homeobox (OTP), mRNA.                                                                 | 23440  | magenta |
| ILMN_1659857 | SNAP29  | synaptosomal-associated protein, 29kDa (SNAP29), mRNA.                                           | 9342   | magenta |
| ILMN_1660880 | RNH1    | ribonuclease/angiogenin inhibitor 1 (RNH1), transcript variant 8, mRNA.                          | 6050   | magenta |
| ILMN_1661337 | SRM     | spermidine synthase (SRM), mRNA.                                                                 | 6723   | magenta |
| ILMN_1661439 | FLOT1   | flotillin 1 (FLOT1), mRNA.                                                                       | 10211  | magenta |
| ILMN_1661594 | C2orf42 | chromosome 2 open reading frame 42 (C2orf42), mRNA.                                              | 54980  | magenta |
| ILMN_1664098 | FASTK   | Fas-activated serine/threonine kinase (FASTK), transcript variant 1, mRNA.                       | 10922  | magenta |
| ILMN_1666194 | IFRD2   | interferon-related developmental regulator 2 (IFRD2), mRNA.                                      | 7866   | magenta |
| ILMN_1667213 | DFFA    | DNA fragmentation factor, 45kDa, alpha polypeptide (DFFA), transcript variant 1, mRNA.           | 1676   | magenta |
| ILMN_1669070 | MIPEP   | mitochondrial intermediate peptidase (MIPEP), nuclear gene encoding mitochondrial protein, mRNA. | 4285   | magenta |
| ILMN_1669572 | RNF126  | ring finger protein 126 (RNF126), transcript variant 2, mRNA.                                    | 55658  | magenta |
| ILMN_1669718 | PSENEN  | presenilin enhancer 2 homolog (C. elegans) (PSENEN), mRNA.                                       | 55851  | magenta |
| ILMN_1671054 | HLA-A   | major histocompatibility complex, class I, A (HLA-A), mRNA.                                      | 3105   | magenta |
| ILMN_1671191 | UQCRC1  | ubiquinol-cytochrome c reductase core protein I (UQCRC1), mRNA.                                  | 7384   | magenta |
| ILMN_1671583 | MKRN1   | makorin, ring finger protein, 1 (MKRN1), mRNA.                                                   | 23608  | magenta |
| ILMN_1671932 | SAMM50  | sorting and assembly machinery component 50 homolog (S. cerevisiae) (SAMM50), mRNA.              | 25813  | magenta |
| ILMN_1672417 | PTPRCAP | protein tyrosine phosphatase, receptor type, C-associated protein (PTPRCAP), mRNA.               | 5790   | magenta |
| ILMN_1672443 | QDPR    | quinoid dihydropteridine reductase (QDPR), mRNA.                                                 | 5860   | magenta |
| ILMN_1673026 | CHCHD3  | coiled-coil-helix-coiled-coil-helix domain containing 3 (CHCHD3), mRNA.                          | 54927  | magenta |

|              |          |                                                                                                                              |        |         |
|--------------|----------|------------------------------------------------------------------------------------------------------------------------------|--------|---------|
| ILMN_1678052 | C19orf24 | chromosome 19 open reading frame 24 (C19orf24), mRNA.                                                                        | 55009  | magenta |
| ILMN_1679880 | THOC6    | THO complex 6 homolog (Drosophila) (THOC6), mRNA.                                                                            | 79228  | magenta |
| ILMN_1679949 | SLC25A23 | solute carrier family 25 (mitochondrial carrier; phosphate carrier), member 23 (SLC25A23), mRNA.                             | 79085  | magenta |
| ILMN_1681802 | GRK6     | G protein-coupled receptor kinase 6 (GRK6), transcript variant 2, mRNA.                                                      | 2870   | magenta |
| ILMN_1681998 | AP2B1    | adaptor-related protein complex 2, beta 1 subunit (AP2B1), transcript variant 1, mRNA.                                       | 163    | magenta |
| ILMN_1683660 | EIF3H    | eukaryotic translation initiation factor 3, subunit 3 gamma, 40kDa (EIF3S3), mRNA.                                           | 8667   | magenta |
| ILMN_1684217 | AURKB    | aurora kinase B (AURKB), mRNA.                                                                                               | 9212   | magenta |
| ILMN_1684929 | TOPBP1   | topoisomerase (DNA) II binding protein 1 (TOPBP1), mRNA.                                                                     | 11073  | magenta |
| ILMN_1685725 | ILDR1    | immunoglobulin-like domain containing receptor 1 (ILDR1), mRNA.                                                              | 286676 | magenta |
| ILMN_1686748 | TMEM9    | transmembrane protein 9 (TMEM9), mRNA.                                                                                       | 252839 | magenta |
| ILMN_1688959 | CD27     | CD27 molecule (CD27), mRNA.                                                                                                  | 939    | magenta |
| ILMN_1689001 | CDK4     | cyclin-dependent kinase 4 (CDK4), mRNA.                                                                                      | 1019   | magenta |
| ILMN_1689110 | NOB1     | NIN1/RPN12 binding protein 1 homolog (S. cerevisiae) (NOB1), mRNA.                                                           | 28987  | magenta |
| ILMN_1689342 | NUBP1    | nucleotide binding protein 1 (MinD homolog, E. coli) (NUBP1), mRNA.                                                          | 4682   | magenta |
| ILMN_1689446 | EIF3G    | eukaryotic translation initiation factor 3, subunit 4 delta, 44kDa (EIF3S4), mRNA.                                           | 8666   | magenta |
| ILMN_1689800 | MRT04    | mRNA turnover 4 homolog (S. cerevisiae) (MRT04), mRNA.                                                                       | 51154  | magenta |
| ILMN_1690494 | RPL6     | ribosomal protein L6 (RPL6), transcript variant 2, mRNA.                                                                     | 6128   | magenta |
| ILMN_1690610 | RALY     | RNA binding protein, autoantigenic (hnRNP-associated with lethal yellow homolog (mouse)) (RALY), transcript variant 1, mRNA. | 22913  | magenta |
| ILMN_1690653 | CDK2AP2  | CDK2-associated protein 2 (CDK2AP2), mRNA.                                                                                   | 10263  | magenta |
| ILMN_1691090 | MPV17    | MpV17 mitochondrial inner membrane protein (MPV17), nuclear gene encoding mitochondrial protein, mRNA.                       | 4358   | magenta |
| ILMN_1691795 | C19orf43 | chromosome 19 open reading frame 43 (C19orf43), mRNA.                                                                        | 79002  | magenta |

|              |           |                                                                                                  |        |         |
|--------------|-----------|--------------------------------------------------------------------------------------------------|--------|---------|
| ILMN_1691843 | RNPS1     | RNA binding protein S1, serine-rich domain (RNPS1), transcript variant 1, mRNA.                  | 10921  | magenta |
| ILMN_1692092 | WWP1      | WW domain containing E3 ubiquitin protein ligase 1 (WWP1), mRNA.                                 | 11059  | magenta |
| ILMN_1693430 | NME1-NME2 | NM23-LV (NME1-NME2), mRNA.                                                                       | 654364 | magenta |
| ILMN_1694742 | RPS29     | ribosomal protein S29 (RPS29), transcript variant 1, mRNA.                                       | 6235   | magenta |
| ILMN_1694950 | MRPL28    | mitochondrial ribosomal protein L28 (MRPL28), nuclear gene encoding mitochondrial protein, mRNA. | 10573  | magenta |
| ILMN_1695420 | CLTA      | clathrin, light chain (Lca) (CLTA), transcript variant 1, mRNA.                                  | 1211   | magenta |
| ILMN_1696640 | TCHP      | trichoplein, keratin filament binding (TCHP), mRNA.                                              | 84260  | magenta |
| ILMN_1696952 | SEC61A1   | Sec61 alpha 1 subunit (S. cerevisiae) (SEC61A1), mRNA.                                           | 29927  | magenta |
| ILMN_1697777 | TSTA3     | tissue specific transplantation antigen P35B (TSTA3), mRNA.                                      | 7264   | magenta |
| ILMN_1698491 | MBD3      | methyl-CpG binding domain protein 3 (MBD3), mRNA.                                                | 53615  | magenta |
| ILMN_1699598 | AP2M1     | adaptor-related protein complex 2, mu 1 subunit (AP2M1), transcript variant 2, mRNA.             | 1173   | magenta |
| ILMN_1699603 | MRPL12    | mitochondrial ribosomal protein L12 (MRPL12), nuclear gene encoding mitochondrial protein, mRNA. | 6182   | magenta |
| ILMN_1699737 | TRAP1     | TNF receptor-associated protein 1 (TRAP1), mRNA.                                                 | 10131  | magenta |
| ILMN_1703305 | TWF2      | twinfilin, actin-binding protein, homolog 2 (Drosophila) (TWF2), mRNA.                           | 11344  | magenta |
| ILMN_1703370 | ZDHHC12   | zinc finger, DHHC-type containing 12 (ZDHHC12), mRNA.                                            | 84885  | magenta |
| ILMN_1704055 | NA        | hypothetical protein HSPC111 (HSPC111), mRNA.                                                    | 51491  | magenta |
| ILMN_1704253 | C6orf106  | chromosome 6 open reading frame 106 (C6orf106), transcript variant 2, mRNA.                      | 64771  | magenta |
| ILMN_1705117 | SEC13     | SEC13 homolog (S. cerevisiae) (SEC13), mRNA.                                                     | 6396   | magenta |
| ILMN_1705364 | BAG6      | HLA-B associated transcript 3 (BAT3), transcript variant 1, mRNA.                                | 7917   | magenta |
| ILMN_1707137 | C17orf97  | hypothetical gene supported by AK128660 (LOC400566), mRNA.                                       | 400566 | magenta |
| ILMN_1708660 | RWDD4     | RWD domain containing 4A (RWDD4A), mRNA.                                                         | 201965 | magenta |
| ILMN_1708808 | RUVBL2    | RuvB-like 2 (E. coli) (RUVBL2), mRNA.                                                            | 10856  | magenta |



|              |           |                                                                                                    |        |         |
|--------------|-----------|----------------------------------------------------------------------------------------------------|--------|---------|
| ILMN_1711543 | C14orf169 | chromosome 14 open reading frame 169 (C14orf169), mRNA.                                            | 79697  | magenta |
| ILMN_1711627 | SIAH1     | seven in absentia homolog 1 (Drosophila) (SIAH1), transcript variant 2, mRNA.                      | 6477   | magenta |
| ILMN_1713749 | CORO1A    | coronin, actin binding protein, 1A (CORO1A), mRNA.                                                 | 11151  | magenta |
| ILMN_1713985 | MAF1      | MAF1 homolog (S. cerevisiae) (MAF1), mRNA.                                                         | 84232  | magenta |
| ILMN_1715698 | NA        | similar to DNA segment, Chr 11, Brigham & Womens Genetics 0434 expressed (MGC71993), mRNA.         | 440400 | magenta |
| ILMN_1715896 | PMVK      | phosphomevalonate kinase (PMVK), mRNA.                                                             | 10654  | magenta |
| ILMN_1717154 | AQR       | aquarius homolog (mouse) (AQR), mRNA.                                                              | 9716   | magenta |
| ILMN_1719471 | MSH3      | mutS homolog 3 (E. coli) (MSH3), mRNA.                                                             | 4437   | magenta |
| ILMN_1719906 | HADH      | hydroxyacyl-Coenzyme A dehydrogenase (HADH), nuclear gene encoding mitochondrial protein, mRNA.    | 3033   | magenta |
| ILMN_1720319 | SLC35A4   | solute carrier family 35, member A4 (SLC35A4), mRNA.                                               | 113829 | magenta |
| ILMN_1721093 | TAF10     | TAF10 RNA polymerase II, TATA box binding protein (TBP)-associated factor, 30kDa (TAF10), mRNA.    | 6881   | magenta |
| ILMN_1721337 | MRPS18B   | mitochondrial ribosomal protein S18B (MRPS18B), nuclear gene encoding mitochondrial protein, mRNA. | 28973  | magenta |
| ILMN_1722065 | COPG2     | coatamer protein complex, subunit gamma 2 (COPG2), mRNA.                                           | 26958  | magenta |
| ILMN_1723185 | ELOF1     | elongation factor 1 homolog (S. cerevisiae) (ELOF1), mRNA.                                         | 84337  | magenta |
| ILMN_1723729 | RSL1D1    | ribosomal L1 domain containing 1 (RSL1D1), mRNA.                                                   | 26156  | magenta |
| ILMN_1724145 | CBX4      | chromobox homolog 4 (Pc class homolog, Drosophila) (CBX4), mRNA.                                   | 8535   | magenta |
| ILMN_1725642 | SUMO3     | SMT3 suppressor of mif two 3 homolog 3 (S. cerevisiae) (SUMO3), mRNA.                              | 6612   | magenta |
| ILMN_1726434 | UNC45A    | unc-45 homolog A (C. elegans) (UNC45A), transcript variant 2, mRNA.                                | 55898  | magenta |
| ILMN_1726466 | HDHD3     | haloacid dehalogenase-like hydrolase domain containing 3 (HDHD3), mRNA.                            | 81932  | magenta |
| ILMN_1726786 | TNRC6B    | trinucleotide repeat containing 6B (TNRC6B), transcript variant 2, mRNA.                           | 23112  | magenta |
| ILMN_1727444 | PAGR1     | chromosome 16 open reading frame 53 (C16orf53), mRNA.                                              | 79447  | magenta |

|              |          |                                                                                                    |        |         |
|--------------|----------|----------------------------------------------------------------------------------------------------|--------|---------|
| ILMN_1728047 | AKR1A1   | aldo-keto reductase family 1, member A1 (aldehyde reductase) (AKR1A1), transcript variant 1, mRNA. | 10327  | magenta |
| ILMN_1728355 | PSMD4    | proteasome (prosome, macropain) 26S subunit, non-ATPase, 4 (PSMD4), transcript variant 2, mRNA.    | 5710   | magenta |
| ILMN_1729319 | USP7     | ubiquitin specific peptidase 7 (herpes virus-associated) (USP7), mRNA.                             | 7874   | magenta |
| ILMN_1731851 | OXA1L    | oxidase (cytochrome c) assembly 1-like (OXA1L), mRNA.                                              | 5018   | magenta |
| ILMN_1733616 | TFEB     | transcription factor EB (TFEB), mRNA.                                                              | 7942   | magenta |
| ILMN_1733799 | FAM195B  | hypothetical protein LOC348262 (LOC348262), mRNA.                                                  | 348262 | magenta |
| ILMN_1733947 | FKBP8    | FK506 binding protein 8, 38kDa (FKBP8), mRNA.                                                      | 23770  | magenta |
| ILMN_1736548 | PHACTR4  | phosphatase and actin regulator 4 (PHACTR4), transcript variant 1, mRNA.                           | 65979  | magenta |
| ILMN_1737074 | RPS2     | PREDICTED: similar to ribosomal protein S2, transcript variant 3 (LOC440589), mRNA.                | 440589 | magenta |
| ILMN_1737163 | SH3BGRL3 | SH3 domain binding glutamic acid-rich protein like 3 (SH3BGRL3), mRNA.                             | 83442  | magenta |
| ILMN_1737344 | DDX41    | DEAD (Asp-Glu-Ala-Asp) box polypeptide 41 (DDX41), mRNA.                                           | 51428  | magenta |
| ILMN_1738103 | COPE     | coatomer protein complex, subunit epsilon (COPE), transcript variant 2, mRNA.                      | 11316  | magenta |
| ILMN_1738369 | TUFM     | Tu translation elongation factor, mitochondrial (TUFM), mRNA.                                      | 7284   | magenta |
| ILMN_1738572 | USP48    | ubiquitin specific peptidase 48 (USP48), transcript variant 2, mRNA.                               | 84196  | magenta |
| ILMN_1738652 | BAD      | BCL2-antagonist of cell death (BAD), transcript variant 2, mRNA.                                   | 572    | magenta |
| ILMN_1738767 | PLP2     | proteolipid protein 2 (colonic epithelium-enriched) (PLP2), mRNA.                                  | 5355   | magenta |
| ILMN_1738784 | PPP2R5A  | protein phosphatase 2, regulatory subunit B', alpha isoform (PPP2R5A), mRNA.                       | 5525   | magenta |
| ILMN_1740737 | DCPS     | decapping enzyme, scavenger (DCPS), mRNA.                                                          | 28960  | magenta |
| ILMN_1740976 | NONO     | non-POU domain containing, octamer-binding (NONO), mRNA.                                           | 4841   | magenta |
| ILMN_1741997 | SNRPC    | small nuclear ribonucleoprotein polypeptide C (SNRPC), mRNA.                                       | 6631   | magenta |
| ILMN_1743582 | NUDT22   | nudix (nucleoside diphosphate linked moiety X)-type motif 22 (NUDT22), mRNA.                       | 84304  | magenta |
| ILMN_1745271 | EXOSC4   | exosome component 4 (EXOSC4), mRNA.                                                                | 54512  | magenta |

|              |           |                                                                                                                  |        |         |
|--------------|-----------|------------------------------------------------------------------------------------------------------------------|--------|---------|
| ILMN_1745620 | KRCC1     | lysine-rich coiled-coil 1 (KRCC1), mRNA.                                                                         | 51315  | magenta |
| ILMN_1745760 | RANGRF    | RAN guanine nucleotide release factor (RANGNRF), mRNA.                                                           | 29098  | magenta |
| ILMN_1746588 | TALDO1    | transaldolase 1 (TALDO1), mRNA.                                                                                  | 6888   | magenta |
| ILMN_1747419 | PCGF2     | polycomb group ring finger 2 (PCGF2), mRNA.                                                                      | 7703   | magenta |
| ILMN_1749405 | KIAA1191  | KIAA1191 (KIAA1191), transcript variant 3, mRNA.                                                                 | 57179  | magenta |
| ILMN_1750100 | TUBB8     | tubulin, beta polypeptide 4, member Q (TUBB4Q), mRNA.                                                            | 56604  | magenta |
| ILMN_1750130 | GSPT1     | G1 to S phase transition 1 (GSPT1), mRNA.                                                                        | 2935   | magenta |
| ILMN_1751431 | WIBG      | within bgcn homolog (Drosophila) (WIBG), mRNA.                                                                   | 84305  | magenta |
| ILMN_1751561 | CAMK1D    | calcium/calmodulin-dependent protein kinase ID (CAMK1D), transcript variant 2, mRNA.                             | 57118  | magenta |
| ILMN_1751753 | IDH2      | isocitrate dehydrogenase 2 (NADP+), mitochondrial (IDH2), mRNA.                                                  | 3418   | magenta |
| ILMN_1752285 | RPL4      | ribosomal protein L4 (RPL4), mRNA.                                                                               | 6124   | magenta |
| ILMN_1752423 | MAP2K2    | mitogen-activated protein kinase kinase 2 (MAP2K2), mRNA.                                                        | 5605   | magenta |
| ILMN_1752451 | CTSH      | cathepsin H (CTSH), transcript variant 2, mRNA.                                                                  | 1512   | magenta |
| ILMN_1752582 | RAB5B     | RAB5B, member RAS oncogene family (RAB5B), mRNA.                                                                 | 5869   | magenta |
| ILMN_1752967 | DHPS      | deoxyhypusine synthase (DHPS), transcript variant 3, mRNA.                                                       | 1725   | magenta |
| ILMN_1755321 | AAAS      | achalasia, adrenocortical insufficiency, alacrimia (Allgrove, triple-A) (AAAS), mRNA.                            | 8086   | magenta |
| ILMN_1756126 | STUB1     | STIP1 homology and U-box containing protein 1 (STUB1), mRNA.                                                     | 10273  | magenta |
| ILMN_1756439 | SCRN1     | secernin 1 (SCRN1), mRNA.                                                                                        | 9805   | magenta |
| ILMN_1758640 | NDUFA10   | PREDICTED: similar to NADH dehydrogenase (ubiquinone) 1 alpha subcomplex, 10, 42kDa precursor (LOC732160), mRNA. | 732160 | magenta |
| ILMN_1759075 | TNFRSF13B | tumor necrosis factor receptor superfamily, member 13B (TNFRSF13B), mRNA.                                        | 23495  | magenta |
| ILMN_1759341 | MAN2B1    | mannosidase, alpha, class 2B, member 1 (MAN2B1), mRNA.                                                           | 4125   | magenta |
| ILMN_1760708 | NA        | crystallin, beta B2 (CRYBB2), mRNA.                                                                              | 1415   | magenta |
| ILMN_1762316 | CPSF3L    | cleavage and polyadenylation specific factor 3-like (CPSF3L), mRNA.                                              | 54973  | magenta |

|              |          |                                                                                                |        |         |
|--------------|----------|------------------------------------------------------------------------------------------------|--------|---------|
| ILMN_1762615 | FAM175B  | KIAA0157 (KIAA0157), mRNA.                                                                     | 23172  | magenta |
| ILMN_1763705 | WRNIP1   | Werner helicase interacting protein 1 (WRNIP1), transcript variant 2, mRNA.                    | 56897  | magenta |
| ILMN_1763824 | PTGES2   | prostaglandin E synthase 2 (PTGES2), transcript variant 1, mRNA.                               | 80142  | magenta |
| ILMN_1765257 | CINP     | cyclin-dependent kinase 2-interacting protein (CINP), mRNA.                                    | 51550  | magenta |
| ILMN_1765258 | HLA-E    | major histocompatibility complex, class I, E (HLA-E), mRNA.                                    | 3133   | magenta |
| ILMN_1765621 | HDGF     | hepatoma-derived growth factor (high-mobility group protein 1-like) (HDGF), mRNA.              | 3068   | magenta |
| ILMN_1767324 | EIF4EBP1 | eukaryotic translation initiation factor 4E binding protein 1 (EIF4EBP1), mRNA.                | 1978   | magenta |
| ILMN_1767365 | PAK1     | p21/Cdc42/Rac1-activated kinase 1 (STE20 homolog, yeast) (PAK1), mRNA.                         | 5058   | magenta |
| ILMN_1768181 | TOR3A    | torsin family 3, member A (TOR3A), mRNA.                                                       | 64222  | magenta |
| ILMN_1768662 | UCK2     | uridine-cytidine kinase 2 (UCK2), mRNA.                                                        | 7371   | magenta |
| ILMN_1768773 | NA       | PREDICTED: similar to cytochrome P450 monooxygenase CYP2T1 (LOC731986), mRNA.                  | 731986 | magenta |
| ILMN_1768867 | AP3B1    | adaptor-related protein complex 3, beta 1 subunit (AP3B1), mRNA.                               | 8546   | magenta |
| ILMN_1769191 | GNAS     | GNAS complex locus (GNAS), transcript variant 1, mRNA.                                         | 2778   | magenta |
| ILMN_1770244 | CBX1     | chromobox homolog 1 (HP1 beta homolog Drosophila ) (CBX1), mRNA.                               | 10951  | magenta |
| ILMN_1770641 | KLHL3    | kelch-like 3 (Drosophila) (KLHL3), mRNA.                                                       | 26249  | magenta |
| ILMN_1770817 | CAPNS1   | calpain, small subunit 1 (CAPNS1), transcript variant 2, mRNA.                                 | 826    | magenta |
| ILMN_1772113 | U2AF1    | U2 small nuclear RNA auxiliary factor 1 (U2AF1), transcript variant a, mRNA.                   | 7307   | magenta |
| ILMN_1772527 | ATG101   | chromosome 12 open reading frame 44 (C12orf44), mRNA.                                          | 60673  | magenta |
| ILMN_1772798 | ARPP19   | cyclic AMP phosphoprotein, 19 kD (ARPP-19), mRNA.                                              | 10776  | magenta |
| ILMN_1773228 | DLST     | dihydrolipoamide S-succinyltransferase (E2 component of 2-oxo-glutarate complex) (DLST), mRNA. | 1743   | magenta |
| ILMN_1773313 | NA       | upregulated during skeletal muscle growth 5 homolog (mouse) (USMG5), mRNA.                     | 84833  | magenta |
| ILMN_1773935 | TMEM165  | transmembrane protein 165 (TMEM165), mRNA.                                                     | 55858  | magenta |
| ILMN_1774079 | NUDC     | nuclear distribution gene C homolog (A. nidulans) (NUDC), mRNA.                                | 10726  | magenta |

|              |          |                                                                                                                             |        |         |
|--------------|----------|-----------------------------------------------------------------------------------------------------------------------------|--------|---------|
| ILMN_1774432 | DTD1     | D-tyrosyl-tRNA deacylase 1 homolog ( <i>S. cerevisiae</i> ) (DTD1), mRNA.                                                   | 92675  | magenta |
| ILMN_1775074 | TUBGCP2  | tubulin, gamma complex associated protein 2 (TUBGCP2), mRNA.                                                                | 10844  | magenta |
| ILMN_1776147 | C21orf59 | chromosome 21 open reading frame 59 (C21orf59), mRNA.                                                                       | 56683  | magenta |
| ILMN_1776577 | DSCC1    | defective in sister chromatid cohesion homolog 1 ( <i>S. cerevisiae</i> ) (DCC1), mRNA.                                     | 79075  | magenta |
| ILMN_1777584 | KARS     | lysyl-tRNA synthetase (KARS), mRNA.                                                                                         | 3735   | magenta |
| ILMN_1777794 | PRKCSH   | protein kinase C substrate 80K-H (PRKCSH), transcript variant 1, mRNA.                                                      | 5589   | magenta |
| ILMN_1778255 | FARSA    | phenylalanyl-tRNA synthetase, alpha subunit (FARSA), mRNA.                                                                  | 2193   | magenta |
| ILMN_1780315 | PUSL1    | pseudouridylate synthase-like 1 (PUSL1), mRNA.                                                                              | 126789 | magenta |
| ILMN_1780769 | TUBB4B   | tubulin, beta 2C (TUBB2C), mRNA.                                                                                            | 10383  | magenta |
| ILMN_1781906 | RBM17    | RNA binding motif protein 17 (RBM17), mRNA.                                                                                 | 84991  | magenta |
| ILMN_1782543 | EEF1D    | eukaryotic translation elongation factor 1 delta (guanine nucleotide exchange protein) (EEF1D), transcript variant 2, mRNA. | 1936   | magenta |
| ILMN_1782618 | C9orf16  | chromosome 9 open reading frame 16 (C9orf16), mRNA.                                                                         | 79095  | magenta |
| ILMN_1783753 | TXNDC12  | thioredoxin domain containing 12 (endoplasmic reticulum) (TXNDC12), mRNA.                                                   | 51060  | magenta |
| ILMN_1786212 | TUBB8    | tubulin, beta 8 (TUBB8), mRNA.                                                                                              | 347688 | magenta |
| ILMN_1787410 | EIF6     | integrin beta 4 binding protein (ITGB4BP), transcript variant 4, mRNA.                                                      | 3692   | magenta |
| ILMN_1789233 | VPS37C   | vacuolar protein sorting 37 homolog C ( <i>S. cerevisiae</i> ) (VPS37C), mRNA.                                              | 55048  | magenta |
| ILMN_1790797 | VPS28    | vacuolar protein sorting 28 homolog ( <i>S. cerevisiae</i> ) (VPS28), transcript variant 2, mRNA.                           | 51160  | magenta |
| ILMN_1792748 | CPS1     | carbamoyl-phosphate synthetase 1, mitochondrial (CPS1), mRNA.                                                               | 1373   | magenta |
| ILMN_1793651 | UBE2N    | ubiquitin-conjugating enzyme E2N (UBC13 homolog, yeast) (UBE2N), mRNA.                                                      | 7334   | magenta |
| ILMN_1795826 | ATP6V0D1 | ATPase, H <sup>+</sup> transporting, lysosomal 38kDa, V0 subunit d1 (ATP6V0D1), mRNA.                                       | 9114   | magenta |
| ILMN_1796430 | PSMD3    | proteasome (prosome, macropain) 26S subunit, non-ATPase, 3 (PSMD3), mRNA.                                                   | 5709   | magenta |

|              |         |                                                                                                                           |        |         |
|--------------|---------|---------------------------------------------------------------------------------------------------------------------------|--------|---------|
| ILMN_1797005 | PGLS    | 6-phosphogluconolactonase (PGLS), mRNA.                                                                                   | 25796  | magenta |
| ILMN_1797522 | DUSP3   | dual specificity phosphatase 3 (vaccinia virus phosphatase VH1-related) (DUSP3), mRNA.                                    | 1845   | magenta |
| ILMN_1798061 | ZFYVE26 | zinc finger, FYVE domain containing 26 (ZFYVE26), mRNA.                                                                   | 23503  | magenta |
| ILMN_1799024 | VAC14   | Vac14 homolog ( <i>S. cerevisiae</i> ) (VAC14), mRNA.                                                                     | 55697  | magenta |
| ILMN_1799951 | LYST    | lysosomal trafficking regulator (LYST), transcript variant 1, mRNA.                                                       | 1130   | magenta |
| ILMN_1800461 | CSNK2B  | casein kinase 2, beta polypeptide (CSNK2B), mRNA.                                                                         | 1460   | magenta |
| ILMN_1800976 | NFATC3  | nuclear factor of activated T-cells, cytoplasmic, calcineurin-dependent 3 (NFATC3), transcript variant 2, mRNA.           | 4775   | magenta |
| ILMN_1801118 | SNRNP25 | chromosome 16 open reading frame 33 (C16orf33), mRNA.                                                                     | 79622  | magenta |
| ILMN_1801313 | SIAH2   | seven in absentia homolog 2 ( <i>Drosophila</i> ) (SIAH2), mRNA.                                                          | 6478   | magenta |
| ILMN_1801913 | PPIH    | peptidylprolyl isomerase H (cyclophilin H) (PPIH), mRNA.                                                                  | 10465  | magenta |
| ILMN_1802252 | GAPDH   | glyceraldehyde-3-phosphate dehydrogenase (GAPDH), mRNA.                                                                   | 2597   | magenta |
| ILMN_1802706 | IDH3G   | isocitrate dehydrogenase 3 (NAD+) gamma (IDH3G), nuclear gene encoding mitochondrial protein, transcript variant 1, mRNA. | 3421   | magenta |
| ILMN_1803277 | MVP     | major vault protein (MVP), transcript variant 2, mRNA.                                                                    | 9961   | magenta |
| ILMN_1803772 | POLD4   | polymerase (DNA-directed), delta 4 (POLD4), mRNA.                                                                         | 57804  | magenta |
| ILMN_1805990 | BAK1    | BCL2-antagonist/killer 1 (BAK1), mRNA.                                                                                    | 578    | magenta |
| ILMN_1806605 | FAHD2B  | PREDICTED: similar to fumarylacetoacetate hydrolase domain containing 2A (LOC731002), mRNA.                               | 731002 | magenta |
| ILMN_1806937 | BABAM1  | HSPC142 protein (HSPC142), transcript variant 1, mRNA.                                                                    | 29086  | magenta |
| ILMN_1807201 | FAM104A | family with sequence similarity 104, member A (FAM104A), mRNA.                                                            | 84923  | magenta |
| ILMN_1809437 | RHBDD2  | rhomboid domain containing 2 (RHBDD2), transcript variant 2, mRNA.                                                        | 57414  | magenta |
| ILMN_1809818 | PRCC    | papillary renal cell carcinoma (translocation-associated) (PRCC), transcript variant 1, mRNA.                             | 5546   | magenta |
| ILMN_1811775 | CCDC124 | coiled-coil domain containing 124 (CCDC124), mRNA.                                                                        | 115098 | magenta |

|              |         |                                                                                                   |        |         |
|--------------|---------|---------------------------------------------------------------------------------------------------|--------|---------|
| ILMN_1813671 | SLC25A1 | solute carrier family 25 (mitochondrial carrier; citrate transporter), member 1 (SLC25A1), mRNA.  | 6576   | magenta |
| ILMN_1814213 | PQLC3   | PQ loop repeat containing 3 (PQLC3), mRNA.                                                        | 130814 | magenta |
| ILMN_1814589 | KIF22   | kinesin family member 22 (KIF22), mRNA.                                                           | 3835   | magenta |
| ILMN_1815169 | MCM5    | MCM5 minichromosome maintenance deficient 5, cell division cycle 46 (S. cerevisiae) (MCM5), mRNA. | 4174   | magenta |
| ILMN_1815402 | LPAR5   | G protein-coupled receptor 92 (GPR92), mRNA.                                                      | 57121  | magenta |

Table S5. List of Unique validated gene targets of three ICS response associated miRs.

| mature_mirna_id | target_symbol | target_entrez |
|-----------------|---------------|---------------|
| hsa-miR-28-5p   | CALM3         | 808           |
| hsa-miR-28-5p   | CCND1         | 595           |
| hsa-miR-28-5p   | CCNT1         | 904           |
| hsa-miR-28-5p   | CHD1          | 1105          |
| hsa-miR-28-5p   | EGFR          | 1956          |
| hsa-miR-28-5p   | FKBP5         | 2289          |
| hsa-miR-28-5p   | GNB1          | 2782          |
| hsa-miR-28-5p   | GNG2          | 54331         |
| hsa-miR-28-5p   | H2BC7         | 8343          |
| hsa-miR-28-5p   | IGF1R         | 3480          |
| hsa-miR-28-5p   | MAPK1         | 5594          |
| hsa-miR-28-5p   | POLR2A        | 5430          |
| hsa-miR-28-5p   | POU2F1        | 5451          |
| hsa-miR-28-5p   | PPP5C         | 5536          |
| hsa-miR-28-5p   | PRMT1         | 3276          |
| hsa-miR-28-5p   | SMC3          | 9126          |
| hsa-miR-28-5p   | SRF           | 6722          |
| hsa-miR-28-5p   | TNRC6B        | 23112         |
| hsa-miR-28-5p   | XPO1          | 7514          |
| hsa-miR-28-5p   | ZNF217        | 7764          |
| hsa-miR-28-5p   | AAAS          | 8086          |
| hsa-miR-28-5p   | AAR2          | 25980         |
| hsa-miR-28-5p   | ABI2          | 10152         |
| hsa-miR-28-5p   | ACBD4         | 79777         |
| hsa-miR-28-5p   | ACE           | 1636          |
| hsa-miR-28-5p   | ACTB          | 60            |

|               |            |        |
|---------------|------------|--------|
| hsa-miR-28-5p | ACTR2      | 10097  |
| hsa-miR-28-5p | ACVR1B     | 91     |
| hsa-miR-28-5p | ACVR2B     | 93     |
| hsa-miR-28-5p | ADA2       | 51816  |
| hsa-miR-28-5p | ADGRV1     | 84059  |
| hsa-miR-28-5p | ADSS2      | 159    |
| hsa-miR-28-5p | AGFG1      | 3267   |
| hsa-miR-28-5p | AGPAT3     | 56894  |
| hsa-miR-28-5p | AGPAT4     | 56895  |
| hsa-miR-28-5p | AGPS       | 8540   |
| hsa-miR-28-5p | AGRN       | 375790 |
| hsa-miR-28-5p | AHDC1      | 27245  |
| hsa-miR-28-5p | AHNAK      | 79026  |
| hsa-miR-28-5p | AKAP11     | 11215  |
| hsa-miR-28-5p | AL096711.2 | NA     |
| hsa-miR-28-5p | ALKBH5     | 54890  |
| hsa-miR-28-5p | ANAPC2     | 29882  |
| hsa-miR-28-5p | ANKRD52    | 283373 |
| hsa-miR-28-5p | ANKZF1     | 55139  |
| hsa-miR-28-5p | ANXA11     | 311    |
| hsa-miR-28-5p | AP1B1      | 162    |
| hsa-miR-28-5p | AP2B1      | 163    |
| hsa-miR-28-5p | APEX1      | 328    |
| hsa-miR-28-5p | APMAP      | 57136  |
| hsa-miR-28-5p | APOBEC3C   | 27350  |
| hsa-miR-28-5p | APOL3      | 80833  |
| hsa-miR-28-5p | APOOL      | 139322 |
| hsa-miR-28-5p | ARF3       | 377    |
| hsa-miR-28-5p | ARFGEF2    | 10564  |
| hsa-miR-28-5p | ARGLU1     | 55082  |
| hsa-miR-28-5p | ARHGAP42   | 143872 |
| hsa-miR-28-5p | ARHGEF9    | 23229  |
| hsa-miR-28-5p | ARPP19     | 10776  |
| hsa-miR-28-5p | ASB1       | 51665  |
| hsa-miR-28-5p | ASF1A      | 25842  |
| hsa-miR-28-5p | ASH1L      | 55870  |
| hsa-miR-28-5p | ATG9A      | 79065  |
| hsa-miR-28-5p | ATMIN      | 23300  |
| hsa-miR-28-5p | ATN1       | 1822   |
| hsa-miR-28-5p | ATP13A2    | 23400  |



|               |          |        |
|---------------|----------|--------|
| hsa-miR-28-5p | ATP2A2   | 488    |
| hsa-miR-28-5p | ATP9A    | 10079  |
| hsa-miR-28-5p | ATRAID   | 51374  |
| hsa-miR-28-5p | B4GALNT4 | 338707 |
| hsa-miR-28-5p | B4GALT1  | 2683   |
| hsa-miR-28-5p | BAG1     | 573    |
| hsa-miR-28-5p | BAZ2A    | 11176  |
| hsa-miR-28-5p | BBS10    | 79738  |
| hsa-miR-28-5p | BCL11B   | 64919  |
| hsa-miR-28-5p | BCL9     | 607    |
| hsa-miR-28-5p | BCOR     | 54880  |
| hsa-miR-28-5p | BECN1    | 8678   |
| hsa-miR-28-5p | BHLHE40  | 8553   |
| hsa-miR-28-5p | BIRC6    | 57448  |
| hsa-miR-28-5p | BIVM     | 54841  |
| hsa-miR-28-5p | BLCAP    | 10904  |
| hsa-miR-28-5p | BLMH     | 642    |
| hsa-miR-28-5p | BMPR2    | 659    |
| hsa-miR-28-5p | BRD4     | 23476  |
| hsa-miR-28-5p | BST2     | 684    |
| hsa-miR-28-5p | BTBD7    | 55727  |
| hsa-miR-28-5p | BTG1     | 694    |
| hsa-miR-28-5p | BTG2     | 7832   |
| hsa-miR-28-5p | BTLA     | 151888 |
| hsa-miR-28-5p | BTRC     | 8945   |
| hsa-miR-28-5p | C16orf72 | 29035  |
| hsa-miR-28-5p | C16orf74 | 404550 |
| hsa-miR-28-5p | C1QTNF1  | 114897 |
| hsa-miR-28-5p | C5orf63  | 401207 |
| hsa-miR-28-5p | C6orf62  | 81688  |
| hsa-miR-28-5p | CAMK2G   | 818    |
| hsa-miR-28-5p | CAMK2N1  | 55450  |
| hsa-miR-28-5p | CAND1    | 55832  |
| hsa-miR-28-5p | CASP2    | 835    |
| hsa-miR-28-5p | CASTOR2  | 729438 |
| hsa-miR-28-5p | CBL      | 867    |
| hsa-miR-28-5p | CBX5     | 23468  |
| hsa-miR-28-5p | CCDC6    | 8030   |
| hsa-miR-28-5p | CCNB1    | 891    |
| hsa-miR-28-5p | CCND2    | 894    |

|               |         |           |
|---------------|---------|-----------|
| hsa-miR-28-5p | CCND3   | 896       |
| hsa-miR-28-5p | CCT3    | 7203      |
| hsa-miR-28-5p | CD276   | 80381     |
| hsa-miR-28-5p | CD47    | 961       |
| hsa-miR-28-5p | CD52    | 1043      |
| hsa-miR-28-5p | CD99L2  | 83692     |
| hsa-miR-28-5p | CDCA7L  | 55536     |
| hsa-miR-28-5p | CDK4    | 1019      |
| hsa-miR-28-5p | CDKN1A  | 1026      |
| hsa-miR-28-5p | CDS1    | 1040      |
| hsa-miR-28-5p | CELF1   | 10658     |
| hsa-miR-28-5p | CELF2   | 10659     |
| hsa-miR-28-5p | CENPB   | 1059      |
| hsa-miR-28-5p | CENPF   | 1063      |
| hsa-miR-28-5p | CENPJ   | 55835     |
| hsa-miR-28-5p | CENPN   | 55839     |
| hsa-miR-28-5p | CENPV   | 201161    |
| hsa-miR-28-5p | CEP162  | 22832     |
| hsa-miR-28-5p | CFL2    | 1073      |
| hsa-miR-28-5p | CHERP   | 10523     |
| hsa-miR-28-5p | CHP1    | 11261     |
| hsa-miR-28-5p | CHST3   | 9469      |
| hsa-miR-28-5p | CISH    | 1154      |
| hsa-miR-28-5p | CLNS1A  | 1207      |
| hsa-miR-28-5p | CLPTM1L | 81037     |
| hsa-miR-28-5p | CMC4    | 100272147 |
| hsa-miR-28-5p | CMTM4   | 146223    |
| hsa-miR-28-5p | CNN3    | 1266      |
| hsa-miR-28-5p | CNOT2   | 4848      |
| hsa-miR-28-5p | CNOT6   | 57472     |
| hsa-miR-28-5p | CNOT6L  | 246175    |
| hsa-miR-28-5p | COA7    | 65260     |
| hsa-miR-28-5p | COG7    | 91949     |
| hsa-miR-28-5p | COL1A1  | 1277      |
| hsa-miR-28-5p | COL1A2  | 1278      |
| hsa-miR-28-5p | COL6A2  | 1292      |
| hsa-miR-28-5p | COPB2   | 9276      |
| hsa-miR-28-5p | CPE     | 1363      |
| hsa-miR-28-5p | CPSF3   | 51692     |
| hsa-miR-28-5p | CPSF7   | 79869     |

|               |          |           |
|---------------|----------|-----------|
| hsa-miR-28-5p | CRISPLD2 | 83716     |
| hsa-miR-28-5p | CRKL     | 1399      |
| hsa-miR-28-5p | CRTC3    | 64784     |
| hsa-miR-28-5p | CRYBG1   | 202       |
| hsa-miR-28-5p | CS       | 1431      |
| hsa-miR-28-5p | CSE1L    | 1434      |
| hsa-miR-28-5p | CSNK1D   | 1453      |
| hsa-miR-28-5p | CSNK1G1  | 53944     |
| hsa-miR-28-5p | CSTF2T   | 23283     |
| hsa-miR-28-5p | CTDNEP1  | 23399     |
| hsa-miR-28-5p | CTIF     | 9811      |
| hsa-miR-28-5p | CTNNB1   | 1499      |
| hsa-miR-28-5p | CTNND1   | 1500      |
| hsa-miR-28-5p | CTTNBP2  | 83992     |
| hsa-miR-28-5p | CWC27    | 10283     |
| hsa-miR-28-5p | CXCL5    | 6374      |
| hsa-miR-28-5p | CYB5B    | 80777     |
| hsa-miR-28-5p | CYP1B1   | 1545      |
| hsa-miR-28-5p | D2HGDH   | 728294    |
| hsa-miR-28-5p | DAAM2    | 23500     |
| hsa-miR-28-5p | DCAF10   | 79269     |
| hsa-miR-28-5p | DCP2     | 167227    |
| hsa-miR-28-5p | DCTN5    | 84516     |
| hsa-miR-28-5p | DDAH1    | 23576     |
| hsa-miR-28-5p | DDB1     | 1642      |
| hsa-miR-28-5p | DDIT4    | 54541     |
| hsa-miR-28-5p | DDR1     | 780       |
| hsa-miR-28-5p | DDT      | 100037417 |
| hsa-miR-28-5p | DDTL     | 100037417 |
| hsa-miR-28-5p | DDX21    | 9188      |
| hsa-miR-28-5p | DDX56    | 54606     |
| hsa-miR-28-5p | DENND4B  | 9909      |
| hsa-miR-28-5p | DGCR2    | 9993      |
| hsa-miR-28-5p | DGCR8    | 54487     |
| hsa-miR-28-5p | DHX16    | 8449      |
| hsa-miR-28-5p | DHX33    | 56919     |
| hsa-miR-28-5p | DIAPH1   | 1729      |
| hsa-miR-28-5p | DICER1   | 23405     |
| hsa-miR-28-5p | DIP2C    | 22982     |
| hsa-miR-28-5p | DIPK1B   | 138311    |

|               |          |        |
|---------------|----------|--------|
| hsa-miR-28-5p | DLG2     | 1740   |
| hsa-miR-28-5p | DLG4     | 1742   |
| hsa-miR-28-5p | DNAH10   | 196385 |
| hsa-miR-28-5p | DNAJA4   | 55466  |
| hsa-miR-28-5p | DNAJB14  | 79982  |
| hsa-miR-28-5p | DNAJB4   | 11080  |
| hsa-miR-28-5p | DNAJB6   | 10049  |
| hsa-miR-28-5p | DNMBP    | 23268  |
| hsa-miR-28-5p | DOCK6    | 57572  |
| hsa-miR-28-5p | DOK3     | 79930  |
| hsa-miR-28-5p | DRAXIN   | 374946 |
| hsa-miR-28-5p | DST      | 667    |
| hsa-miR-28-5p | DUSP18   | 150290 |
| hsa-miR-28-5p | DUSP8    | 1850   |
| hsa-miR-28-5p | DYNC1H1  | 1778   |
| hsa-miR-28-5p | DYNC1LI2 | 1783   |
| hsa-miR-28-5p | DYNLL2   | 140735 |
| hsa-miR-28-5p | DYRK1B   | 9149   |
| hsa-miR-28-5p | DYRK2    | 8445   |
| hsa-miR-28-5p | DYRK4    | 8798   |
| hsa-miR-28-5p | E2F3     | 1871   |
| hsa-miR-28-5p | E2F6     | 1876   |
| hsa-miR-28-5p | EDA2R    | 60401  |
| hsa-miR-28-5p | EEF1D    | 1936   |
| hsa-miR-28-5p | EEF2     | 1938   |
| hsa-miR-28-5p | EHD2     | 30846  |
| hsa-miR-28-5p | EIF2AK1  | 27102  |
| hsa-miR-28-5p | EIF4A2   | 1974   |
| hsa-miR-28-5p | EIF4B    | 1975   |
| hsa-miR-28-5p | EIF4EBP2 | 1979   |
| hsa-miR-28-5p | EIF4G1   | 1981   |
| hsa-miR-28-5p | EIF4G2   | 1982   |
| hsa-miR-28-5p | EMC10    | 284361 |
| hsa-miR-28-5p | EME2     | 197342 |
| hsa-miR-28-5p | EMILIN2  | 84034  |
| hsa-miR-28-5p | EMP3     | 2014   |
| hsa-miR-28-5p | EN2      | 2020   |
| hsa-miR-28-5p | ENO2     | 2026   |
| hsa-miR-28-5p | ENPP5    | 59084  |
| hsa-miR-28-5p | ENTPD4   | 9583   |

|               |         |        |
|---------------|---------|--------|
| hsa-miR-28-5p | EPDR1   | 54749  |
| hsa-miR-28-5p | EPG5    | 57724  |
| hsa-miR-28-5p | EPHA4   | 2043   |
| hsa-miR-28-5p | ERAP1   | 51752  |
| hsa-miR-28-5p | ERG28   | 11161  |
| hsa-miR-28-5p | ERI2    | 112479 |
| hsa-miR-28-5p | ETNK1   | 55500  |
| hsa-miR-28-5p | EYA3    | 2140   |
| hsa-miR-28-5p | EZR     | 7430   |
| hsa-miR-28-5p | FAM102A | 399665 |
| hsa-miR-28-5p | FAM168A | 23201  |
| hsa-miR-28-5p | FAM171B | 165215 |
| hsa-miR-28-5p | FAM174C | 55009  |
| hsa-miR-28-5p | FAM189B | 10712  |
| hsa-miR-28-5p | FAM193B | 54540  |
| hsa-miR-28-5p | FAM210A | 125228 |
| hsa-miR-28-5p | FAM217B | 63939  |
| hsa-miR-28-5p | FAM53C  | 51307  |
| hsa-miR-28-5p | FAR1    | 84188  |
| hsa-miR-28-5p | FARP2   | 9855   |
| hsa-miR-28-5p | FARSA   | 2193   |
| hsa-miR-28-5p | FASTKD5 | 60493  |
| hsa-miR-28-5p | FAT4    | 79633  |
| hsa-miR-28-5p | FBN1    | 2200   |
| hsa-miR-28-5p | FBXL19  | 54620  |
| hsa-miR-28-5p | FBXL5   | 26234  |
| hsa-miR-28-5p | FBXO25  | 26260  |
| hsa-miR-28-5p | FBXO44  | 93611  |
| hsa-miR-28-5p | FBXW2   | 26190  |
| hsa-miR-28-5p | FGF1    | 2246   |
| hsa-miR-28-5p | FLT1    | 2321   |
| hsa-miR-28-5p | FNIP1   | 96459  |
| hsa-miR-28-5p | FOXJ3   | 22887  |
| hsa-miR-28-5p | FOXK1   | 221937 |
| hsa-miR-28-5p | FRS2    | 10818  |
| hsa-miR-28-5p | FTL     | 2512   |
| hsa-miR-28-5p | FTSJ1   | 24140  |
| hsa-miR-28-5p | G3BP1   | 10146  |
| hsa-miR-28-5p | GABBR1  | 2550   |
| hsa-miR-28-5p | GABPA   | 2551   |

|               |         |        |
|---------------|---------|--------|
| hsa-miR-28-5p | GABPB2  | 126626 |
| hsa-miR-28-5p | GABRA1  | 2554   |
| hsa-miR-28-5p | GALNT1  | 2589   |
| hsa-miR-28-5p | GAREM2  | 150946 |
| hsa-miR-28-5p | GATM    | 2628   |
| hsa-miR-28-5p | GEMIN4  | 50628  |
| hsa-miR-28-5p | GFI1    | 2672   |
| hsa-miR-28-5p | GIGYF1  | 64599  |
| hsa-miR-28-5p | GIT1    | 28964  |
| hsa-miR-28-5p | GLUL    | 2752   |
| hsa-miR-28-5p | GNA12   | 2768   |
| hsa-miR-28-5p | GNAS    | 2778   |
| hsa-miR-28-5p | GNS     | 2799   |
| hsa-miR-28-5p | GPHN    | 10243  |
| hsa-miR-28-5p | GPR107  | 57720  |
| hsa-miR-28-5p | GPR137C | 283554 |
| hsa-miR-28-5p | GPX7    | 2882   |
| hsa-miR-28-5p | GRK3    | 157    |
| hsa-miR-28-5p | GRK6    | 2870   |
| hsa-miR-28-5p | GSK3A   | 2931   |
| hsa-miR-28-5p | GSPT2   | 23708  |
| hsa-miR-28-5p | GTF3C4  | 9329   |
| hsa-miR-28-5p | GUCY1A2 | 2977   |
| hsa-miR-28-5p | H1-10   | 8971   |
| hsa-miR-28-5p | H1-2    | 3006   |
| hsa-miR-28-5p | H1-4    | 3008   |
| hsa-miR-28-5p | H1-5    | 3009   |
| hsa-miR-28-5p | HACE1   | 57531  |
| hsa-miR-28-5p | HCFC2   | 29915  |
| hsa-miR-28-5p | HCN2    | 610    |
| hsa-miR-28-5p | HDAC8   | 55869  |
| hsa-miR-28-5p | HDGF    | 3068   |
| hsa-miR-28-5p | HEXB    | 3074   |
| hsa-miR-28-5p | HEXD    | 284004 |
| hsa-miR-28-5p | HEY1    | 23462  |
| hsa-miR-28-5p | HIPK1   | 204851 |
| hsa-miR-28-5p | HMX3    | 340784 |
| hsa-miR-28-5p | HNRNPA3 | 220988 |
| hsa-miR-28-5p | HNRNPC  | 3183   |
| hsa-miR-28-5p | HNRNPH2 | 3188   |

|               |         |        |
|---------------|---------|--------|
| hsa-miR-28-5p | HNRNPK  | 3190   |
| hsa-miR-28-5p | HNRNPU  | 3192   |
| hsa-miR-28-5p | HOXA5   | 3202   |
| hsa-miR-28-5p | HPS4    | 89781  |
| hsa-miR-28-5p | HSP90B1 | 7184   |
| hsa-miR-28-5p | HSPA14  | 51182  |
| hsa-miR-28-5p | HSPA1A  | 3303   |
| hsa-miR-28-5p | HSPA1B  | 3304   |
| hsa-miR-28-5p | HSPG2   | 3339   |
| hsa-miR-28-5p | HYI     | 81888  |
| hsa-miR-28-5p | ICE2    | 79664  |
| hsa-miR-28-5p | ICOSLG  | 23308  |
| hsa-miR-28-5p | IDE     | 3416   |
| hsa-miR-28-5p | IER2    | 9592   |
| hsa-miR-28-5p | IER3    | 8870   |
| hsa-miR-28-5p | IER5    | 51278  |
| hsa-miR-28-5p | IFNAR2  | 3455   |
| hsa-miR-28-5p | IGF1    | 3479   |
| hsa-miR-28-5p | IGF2BP1 | 10642  |
| hsa-miR-28-5p | IKBKB   | 3551   |
| hsa-miR-28-5p | IL2RG   | 3561   |
| hsa-miR-28-5p | IL34    | 146433 |
| hsa-miR-28-5p | IMPDH1  | 3614   |
| hsa-miR-28-5p | IPO9    | 55705  |
| hsa-miR-28-5p | IQGAP1  | 8826   |
| hsa-miR-28-5p | IQSEC2  | 23096  |
| hsa-miR-28-5p | IRS4    | 8471   |
| hsa-miR-28-5p | ISYNA1  | 51477  |
| hsa-miR-28-5p | ITM2C   | 81618  |
| hsa-miR-28-5p | JAGN1   | 84522  |
| hsa-miR-28-5p | JAM2    | 58494  |
| hsa-miR-28-5p | KANK4   | 163782 |
| hsa-miR-28-5p | KAT6A   | 7994   |
| hsa-miR-28-5p | KAT7    | 11143  |
| hsa-miR-28-5p | KCMF1   | 56888  |
| hsa-miR-28-5p | KCNH2   | 3757   |
| hsa-miR-28-5p | KCNK17  | 89822  |
| hsa-miR-28-5p | KCTD10  | 83892  |
| hsa-miR-28-5p | KDM5C   | 8242   |
| hsa-miR-28-5p | KDM6B   | 23135  |

|               |           |        |
|---------------|-----------|--------|
| hsa-miR-28-5p | KHNYN     | 23351  |
| hsa-miR-28-5p | KIAA0100  | 9703   |
| hsa-miR-28-5p | KIF1B     | 23095  |
| hsa-miR-28-5p | KIF5A     | 3798   |
| hsa-miR-28-5p | KIF5C     | 3800   |
| hsa-miR-28-5p | KLF3      | 51274  |
| hsa-miR-28-5p | KLF6      | 1316   |
| hsa-miR-28-5p | KLF7      | 8609   |
| hsa-miR-28-5p | KLHDC3    | 116138 |
| hsa-miR-28-5p | KLHL11    | 55175  |
| hsa-miR-28-5p | KLHL12    | 59349  |
| hsa-miR-28-5p | KLHL13    | 90293  |
| hsa-miR-28-5p | KLHL22    | 84861  |
| hsa-miR-28-5p | KMT2A     | 4297   |
| hsa-miR-28-5p | KMT2B     | 9757   |
| hsa-miR-28-5p | KMT2D     | 8085   |
| hsa-miR-28-5p | KPNA4     | 3840   |
| hsa-miR-28-5p | KRBA1     | 84626  |
| hsa-miR-28-5p | KRCC1     | 51315  |
| hsa-miR-28-5p | KRT80     | 144501 |
| hsa-miR-28-5p | LAMC1     | 3915   |
| hsa-miR-28-5p | LAMP2     | 3920   |
| hsa-miR-28-5p | LENG8     | 114823 |
| hsa-miR-28-5p | LHFPL2    | 10184  |
| hsa-miR-28-5p | LIFR      | 3977   |
| hsa-miR-28-5p | LIMA1     | 51474  |
| hsa-miR-28-5p | LINC00346 | 283487 |
| hsa-miR-28-5p | LMO7      | 4008   |
| hsa-miR-28-5p | LNPEP     | 4012   |
| hsa-miR-28-5p | LNPK      | 80856  |
| hsa-miR-28-5p | LONRF2    | 164832 |
| hsa-miR-28-5p | LRP8      | 7804   |
| hsa-miR-28-5p | LRRC4B    | 94030  |
| hsa-miR-28-5p | LTA4H     | 4048   |
| hsa-miR-28-5p | LYPD3     | 27076  |
| hsa-miR-28-5p | LZTS2     | 84445  |
| hsa-miR-28-5p | MAD2L1    | 4085   |
| hsa-miR-28-5p | MAL2      | 114569 |
| hsa-miR-28-5p | MAML1     | 9794   |
| hsa-miR-28-5p | MANEA     | 79694  |



|               |          |        |
|---------------|----------|--------|
| hsa-miR-28-5p | MAP1A    | 4130   |
| hsa-miR-28-5p | MAP1B    | 4131   |
| hsa-miR-28-5p | MAP2K3   | 5606   |
| hsa-miR-28-5p | MAP3K9   | 4293   |
| hsa-miR-28-5p | MAPKBP1  | 23005  |
| hsa-miR-28-5p | MAPRE1   | 22919  |
| hsa-miR-28-5p | MARCHF6  | 10299  |
| hsa-miR-28-5p | MARCKSL1 | 65108  |
| hsa-miR-28-5p | MAST4    | 375449 |
| hsa-miR-28-5p | MAZ      | 4150   |
| hsa-miR-28-5p | MCM4     | 4173   |
| hsa-miR-28-5p | MCM7     | 4176   |
| hsa-miR-28-5p | MCUR1    | 63933  |
| hsa-miR-28-5p | MED17    | 9440   |
| hsa-miR-28-5p | MED22    | 6837   |
| hsa-miR-28-5p | MEF2C    | 4208   |
| hsa-miR-28-5p | MEF2D    | 4209   |
| hsa-miR-28-5p | MEIS1    | 4211   |
| hsa-miR-28-5p | MELTF    | 4241   |
| hsa-miR-28-5p | METTL14  | 57721  |
| hsa-miR-28-5p | MGST2    | 4258   |
| hsa-miR-28-5p | MIDN     | 90007  |
| hsa-miR-28-5p | MIGA1    | 374986 |
| hsa-miR-28-5p | MKLN1    | 4289   |
| hsa-miR-28-5p | MLEC     | 9761   |
| hsa-miR-28-5p | MLH1     | 4292   |
| hsa-miR-28-5p | MOGS     | 7841   |
| hsa-miR-28-5p | MORF4L1  | 10933  |
| hsa-miR-28-5p | MORF4L2  | 9643   |
| hsa-miR-28-5p | MPEG1    | 219972 |
| hsa-miR-28-5p | MPL      | 4352   |
| hsa-miR-28-5p | MRPS27   | 23107  |
| hsa-miR-28-5p | MSI2     | 124540 |
| hsa-miR-28-5p | MSL1     | 339287 |
| hsa-miR-28-5p | MSMO1    | 6307   |
| hsa-miR-28-5p | MSN      | 4478   |
| hsa-miR-28-5p | MT-ATP6  | 4508   |
| hsa-miR-28-5p | MT-ND1   | 4535   |
| hsa-miR-28-5p | MT-ND4L  | 4539   |
| hsa-miR-28-5p | MYH15    | 22989  |

|               |         |        |
|---------------|---------|--------|
| hsa-miR-28-5p | MYLK    | 4638   |
| hsa-miR-28-5p | MYO18A  | 399687 |
| hsa-miR-28-5p | MYO1B   | 4430   |
| hsa-miR-28-5p | N4BP1   | 9683   |
| hsa-miR-28-5p | NA      | NA     |
| hsa-miR-28-5p | NAB2    | 4665   |
| hsa-miR-28-5p | NACC2   | 138151 |
| hsa-miR-28-5p | NAP1L1  | 4673   |
| hsa-miR-28-5p | NAP1L2  | 4674   |
| hsa-miR-28-5p | NAT8L   | 339983 |
| hsa-miR-28-5p | NAV1    | 89796  |
| hsa-miR-28-5p | NCDN    | 23154  |
| hsa-miR-28-5p | NCF4    | 4689   |
| hsa-miR-28-5p | NCL     | 4691   |
| hsa-miR-28-5p | NDST1   | 3340   |
| hsa-miR-28-5p | NECAP2  | 55707  |
| hsa-miR-28-5p | NEFL    | 4747   |
| hsa-miR-28-5p | NF1     | 4763   |
| hsa-miR-28-5p | NFE2L1  | 4779   |
| hsa-miR-28-5p | NFIC    | 4782   |
| hsa-miR-28-5p | NFYC    | 4802   |
| hsa-miR-28-5p | NKIRAS2 | 28511  |
| hsa-miR-28-5p | NONO    | 4841   |
| hsa-miR-28-5p | NOP2    | 4839   |
| hsa-miR-28-5p | NOP53   | 29997  |
| hsa-miR-28-5p | NOS1AP  | 9722   |
| hsa-miR-28-5p | NOTCH2  | 4853   |
| hsa-miR-28-5p | NOTCH3  | 4854   |
| hsa-miR-28-5p | NPC2    | 10577  |
| hsa-miR-28-5p | NR2C2   | 7182   |
| hsa-miR-28-5p | NR2F6   | 2063   |
| hsa-miR-28-5p | NRBP1   | 29959  |
| hsa-miR-28-5p | NRF1    | 4899   |
| hsa-miR-28-5p | NRN1    | 51299  |
| hsa-miR-28-5p | NSD1    | 64324  |
| hsa-miR-28-5p | NSD3    | 54904  |
| hsa-miR-28-5p | NSUN7   | 79730  |
| hsa-miR-28-5p | NT5C3B  | 115024 |
| hsa-miR-28-5p | NTMT1   | 28989  |
| hsa-miR-28-5p | NUDCD3  | 23386  |

|               |          |           |
|---------------|----------|-----------|
| hsa-miR-28-5p | NUFIP2   | 57532     |
| hsa-miR-28-5p | NUP188   | 23511     |
| hsa-miR-28-5p | NUSAP1   | 51203     |
| hsa-miR-28-5p | OAS2     | 4939      |
| hsa-miR-28-5p | OAZ1     | 4946      |
| hsa-miR-28-5p | OAZ2     | 4947      |
| hsa-miR-28-5p | OLA1     | 29789     |
| hsa-miR-28-5p | OLFM1    | 10439     |
| hsa-miR-28-5p | OTUB1    | 55611     |
| hsa-miR-28-5p | PALB2    | 79728     |
| hsa-miR-28-5p | PAQR5    | 54852     |
| hsa-miR-28-5p | PAX6     | 5080      |
| hsa-miR-28-5p | PCGF5    | 84333     |
| hsa-miR-28-5p | PCLAF    | 9768      |
| hsa-miR-28-5p | PCSK9    | 255738    |
| hsa-miR-28-5p | PCYOX1   | 51449     |
| hsa-miR-28-5p | PDIA6    | 10130     |
| hsa-miR-28-5p | PDK3     | 5165      |
| hsa-miR-28-5p | PER2     | 8864      |
| hsa-miR-28-5p | PGK1     | 5230      |
| hsa-miR-28-5p | PGM1     | 5236      |
| hsa-miR-28-5p | PHF10    | 55274     |
| hsa-miR-28-5p | PHF21A   | 51317     |
| hsa-miR-28-5p | PHLDB2   | 90102     |
| hsa-miR-28-5p | PIANP    | 196500    |
| hsa-miR-28-5p | PIAS1    | 8554      |
| hsa-miR-28-5p | PITRM1   | 10531     |
| hsa-miR-28-5p | PLAC8    | 51316     |
| hsa-miR-28-5p | PLCD3    | 113026    |
| hsa-miR-28-5p | PLEKHG1  | 57480     |
| hsa-miR-28-5p | PLEKHG5  | 57449     |
| hsa-miR-28-5p | PLIN5    | 440503    |
| hsa-miR-28-5p | PLPPR4   | 9890      |
| hsa-miR-28-5p | PNRC1    | 10957     |
| hsa-miR-28-5p | PODXL    | 5420      |
| hsa-miR-28-5p | POLK     | 51426     |
| hsa-miR-28-5p | POM121C  | 100101267 |
| hsa-miR-28-5p | POSTN    | 10631     |
| hsa-miR-28-5p | PPP1R16B | 26051     |
| hsa-miR-28-5p | PPP2CB   | 5516      |

|               |           |       |
|---------------|-----------|-------|
| hsa-miR-28-5p | PPP2R1B   | 5519  |
| hsa-miR-28-5p | PPP2R5E   | 5529  |
| hsa-miR-28-5p | PRDM10    | 56980 |
| hsa-miR-28-5p | PRDM2     | 7799  |
| hsa-miR-28-5p | PRELID3B  | 51012 |
| hsa-miR-28-5p | PRKAA1    | 5562  |
| hsa-miR-28-5p | PRKD2     | 25865 |
| hsa-miR-28-5p | PRKDC     | 5591  |
| hsa-miR-28-5p | PROSER1   | 80209 |
| hsa-miR-28-5p | PRPF38B   | 55119 |
| hsa-miR-28-5p | PRRC2A    | 7916  |
| hsa-miR-28-5p | PRRC2B    | 84726 |
| hsa-miR-28-5p | PRSS16    | 10279 |
| hsa-miR-28-5p | PSENEN    | 55851 |
| hsa-miR-28-5p | PSMC5     | 5705  |
| hsa-miR-28-5p | PSMF1     | 9491  |
| hsa-miR-28-5p | PTBP3     | 9991  |
| hsa-miR-28-5p | PTEN      | 5728  |
| hsa-miR-28-5p | PTOV1     | 53635 |
| hsa-miR-28-5p | PTPN13    | 5783  |
| hsa-miR-28-5p | PTPRJ     | 5795  |
| hsa-miR-28-5p | PUDP      | 8226  |
| hsa-miR-28-5p | PURB      | 5814  |
| hsa-miR-28-5p | PYGO2     | 90780 |
| hsa-miR-28-5p | QRICH1    | 54870 |
| hsa-miR-28-5p | QSOX1     | 5768  |
| hsa-miR-28-5p | R3HDM4    | 91300 |
| hsa-miR-28-5p | RAB11FIP2 | 22841 |
| hsa-miR-28-5p | RAB11FIP5 | 26056 |
| hsa-miR-28-5p | RAB14     | 51552 |
| hsa-miR-28-5p | RAB18     | 22931 |
| hsa-miR-28-5p | RAB30     | 27314 |
| hsa-miR-28-5p | RAB36     | 9609  |
| hsa-miR-28-5p | RAB3B     | 5865  |
| hsa-miR-28-5p | RABL6     | 55684 |
| hsa-miR-28-5p | RACK1     | 10399 |
| hsa-miR-28-5p | RANBP2    | 5903  |
| hsa-miR-28-5p | RAP1B     | 5908  |
| hsa-miR-28-5p | RAP2C     | 57826 |
| hsa-miR-28-5p | RBM28     | 55131 |

|               |         |        |
|---------------|---------|--------|
| hsa-miR-28-5p | RBPJ    | 3516   |
| hsa-miR-28-5p | RC3H1   | 149041 |
| hsa-miR-28-5p | RC3H2   | 54542  |
| hsa-miR-28-5p | RCN2    | 5955   |
| hsa-miR-28-5p | RCOR1   | 23186  |
| hsa-miR-28-5p | RECQL5  | 9400   |
| hsa-miR-28-5p | REG1B   | 5968   |
| hsa-miR-28-5p | REST    | 5978   |
| hsa-miR-28-5p | RETREG2 | 79137  |
| hsa-miR-28-5p | RETREG3 | 162427 |
| hsa-miR-28-5p | RGS20   | 8601   |
| hsa-miR-28-5p | RGS4    | 5999   |
| hsa-miR-28-5p | RHOF    | 54509  |
| hsa-miR-28-5p | RIC8A   | 60626  |
| hsa-miR-28-5p | RIPK1   | 8737   |
| hsa-miR-28-5p | RNF11   | 26994  |
| hsa-miR-28-5p | RNF141  | 50862  |
| hsa-miR-28-5p | RNF144B | 255488 |
| hsa-miR-28-5p | RNF165  | 494470 |
| hsa-miR-28-5p | RNPEPL1 | 57140  |
| hsa-miR-28-5p | RPL22   | 6146   |
| hsa-miR-28-5p | RPL27A  | 6157   |
| hsa-miR-28-5p | RPL9    | 6133   |
| hsa-miR-28-5p | RPRD1A  | 55197  |
| hsa-miR-28-5p | RPS20   | 6224   |
| hsa-miR-28-5p | RWDD1   | 51389  |
| hsa-miR-28-5p | SCAMP3  | 10067  |
| hsa-miR-28-5p | SCD     | 6319   |
| hsa-miR-28-5p | SEC24A  | 10802  |
| hsa-miR-28-5p | SEC24C  | 9632   |
| hsa-miR-28-5p | SEMA4C  | 54910  |
| hsa-miR-28-5p | SEN2    | 59343  |
| hsa-miR-28-5p | SERINC3 | 10955  |
| hsa-miR-28-5p | SESN1   | 27244  |
| hsa-miR-28-5p | SESN3   | 143686 |
| hsa-miR-28-5p | SETBP1  | 26040  |
| hsa-miR-28-5p | SETD5   | 55209  |
| hsa-miR-28-5p | SETD7   | 80854  |
| hsa-miR-28-5p | SF3A2   | 8175   |
| hsa-miR-28-5p | SFT2D2  | 375035 |

|               |          |        |
|---------------|----------|--------|
| hsa-miR-28-5p | SH3PXD2A | 9644   |
| hsa-miR-28-5p | SHFL     | 55337  |
| hsa-miR-28-5p | SHOC2    | 8036   |
| hsa-miR-28-5p | SHTN1    | 57698  |
| hsa-miR-28-5p | SIGMAR1  | 10280  |
| hsa-miR-28-5p | SIK1     | 150094 |
| hsa-miR-28-5p | SIX5     | 147912 |
| hsa-miR-28-5p | SKA1     | 220134 |
| hsa-miR-28-5p | SLC16A10 | 117247 |
| hsa-miR-28-5p | SLC16A3  | 9123   |
| hsa-miR-28-5p | SLC1A2   | 6506   |
| hsa-miR-28-5p | SLC1A5   | 6510   |
| hsa-miR-28-5p | SLC2A13  | 114134 |
| hsa-miR-28-5p | SLC35A5  | 55032  |
| hsa-miR-28-5p | SLC39A14 | 23516  |
| hsa-miR-28-5p | SLC44A1  | 23446  |
| hsa-miR-28-5p | SLC6A1   | 6529   |
| hsa-miR-28-5p | SLC7A5   | 8140   |
| hsa-miR-28-5p | SLC7A6   | 9057   |
| hsa-miR-28-5p | SLF1     | 84250  |
| hsa-miR-28-5p | SLIT2    | 9353   |
| hsa-miR-28-5p | SMAD1    | 4086   |
| hsa-miR-28-5p | SMAD4    | 4089   |
| hsa-miR-28-5p | SMAP1    | 60682  |
| hsa-miR-28-5p | SMARCC2  | 6601   |
| hsa-miR-28-5p | SMCP     | 4184   |
| hsa-miR-28-5p | SMIM12   | 113444 |
| hsa-miR-28-5p | SMYD1    | 150572 |
| hsa-miR-28-5p | SNX1     | 6642   |
| hsa-miR-28-5p | SNX16    | 64089  |
| hsa-miR-28-5p | SNX2     | 6643   |
| hsa-miR-28-5p | SNX29    | 92017  |
| hsa-miR-28-5p | SOAT1    | 6646   |
| hsa-miR-28-5p | SOGA1    | 140710 |
| hsa-miR-28-5p | SON      | 6651   |
| hsa-miR-28-5p | SORT1    | 6272   |
| hsa-miR-28-5p | SPCS3    | 60559  |
| hsa-miR-28-5p | SPEN     | 23013  |
| hsa-miR-28-5p | SPRY4    | 81848  |
| hsa-miR-28-5p | SPTBN1   | 6711   |

|               |         |        |
|---------------|---------|--------|
| hsa-miR-28-5p | SRD5A1  | 6715   |
| hsa-miR-28-5p | SREBF2  | 6721   |
| hsa-miR-28-5p | SRPK2   | 6733   |
| hsa-miR-28-5p | SRPRA   | 6734   |
| hsa-miR-28-5p | SRRM2   | 23524  |
| hsa-miR-28-5p | SSRP1   | 6749   |
| hsa-miR-28-5p | ST14    | 6768   |
| hsa-miR-28-5p | ST7     | 7982   |
| hsa-miR-28-5p | STAT5B  | 6777   |
| hsa-miR-28-5p | STAU1   | 6780   |
| hsa-miR-28-5p | STK3    | 6788   |
| hsa-miR-28-5p | STOX2   | 56977  |
| hsa-miR-28-5p | STRN4   | 29888  |
| hsa-miR-28-5p | STX12   | 23673  |
| hsa-miR-28-5p | SUMO3   | 6612   |
| hsa-miR-28-5p | SYBU    | 55638  |
| hsa-miR-28-5p | SYMPK   | 8189   |
| hsa-miR-28-5p | SYNJ2   | 8871   |
| hsa-miR-28-5p | TAOK1   | 57551  |
| hsa-miR-28-5p | TAOK2   | 9344   |
| hsa-miR-28-5p | TAP2    | 6891   |
| hsa-miR-28-5p | TASOR2  | 54906  |
| hsa-miR-28-5p | TATDN2  | 9797   |
| hsa-miR-28-5p | TAX1BP1 | 8887   |
| hsa-miR-28-5p | TBC1D20 | 128637 |
| hsa-miR-28-5p | TBC1D9  | 23158  |
| hsa-miR-28-5p | TBRG4   | 9238   |
| hsa-miR-28-5p | TCEAL3  | 85012  |
| hsa-miR-28-5p | TCF4    | 6925   |
| hsa-miR-28-5p | TEAD1   | 7003   |
| hsa-miR-28-5p | TEAD3   | 7005   |
| hsa-miR-28-5p | TENT4A  | 11044  |
| hsa-miR-28-5p | TENT5A  | 55603  |
| hsa-miR-28-5p | TERF2IP | 54386  |
| hsa-miR-28-5p | TEX261  | 113419 |
| hsa-miR-28-5p | TGOLN2  | 10618  |
| hsa-miR-28-5p | THRA    | 7067   |
| hsa-miR-28-5p | TLK1    | 9874   |
| hsa-miR-28-5p | TMCO6   | 55374  |
| hsa-miR-28-5p | TMED4   | 222068 |

|               |           |        |
|---------------|-----------|--------|
| hsa-miR-28-5p | TMED9     | 54732  |
| hsa-miR-28-5p | TMEM104   | 54868  |
| hsa-miR-28-5p | TMEM107   | 84314  |
| hsa-miR-28-5p | TMEM109   | 79073  |
| hsa-miR-28-5p | TMEM127   | 55654  |
| hsa-miR-28-5p | TMEM140   | 55281  |
| hsa-miR-28-5p | TMEM167A  | 153339 |
| hsa-miR-28-5p | TMEM167B  | 56900  |
| hsa-miR-28-5p | TMEM214   | 54867  |
| hsa-miR-28-5p | TMEM258   | 746    |
| hsa-miR-28-5p | TMEM41A   | 90407  |
| hsa-miR-28-5p | TMEM63A   | 9725   |
| hsa-miR-28-5p | TMPO      | 7112   |
| hsa-miR-28-5p | TMX3      | 54495  |
| hsa-miR-28-5p | TMX4      | 56255  |
| hsa-miR-28-5p | TNFRSF10B | 8795   |
| hsa-miR-28-5p | TNIP2     | 79155  |
| hsa-miR-28-5p | TNKS      | 8658   |
| hsa-miR-28-5p | TNPO1     | 3842   |
| hsa-miR-28-5p | TNPO2     | 30000  |
| hsa-miR-28-5p | TNS1      | 7145   |
| hsa-miR-28-5p | TOLLIP    | 54472  |
| hsa-miR-28-5p | TOR1AIP2  | 163590 |
| hsa-miR-28-5p | TP53      | 7157   |
| hsa-miR-28-5p | TP53BP2   | 7159   |
| hsa-miR-28-5p | TPM4      | 7171   |
| hsa-miR-28-5p | TRAM2     | 9697   |
| hsa-miR-28-5p | TRIM23    | 373    |
| hsa-miR-28-5p | TRIM44    | 54765  |
| hsa-miR-28-5p | TRIM65    | 201292 |
| hsa-miR-28-5p | TRIO      | 7204   |
| hsa-miR-28-5p | TRIOBP    | 11078  |
| hsa-miR-28-5p | TRPS1     | 7227   |
| hsa-miR-28-5p | TSC22D1   | 8848   |
| hsa-miR-28-5p | TSPYL4    | 23270  |
| hsa-miR-28-5p | TTLL4     | 9654   |
| hsa-miR-28-5p | TUB       | 7275   |
| hsa-miR-28-5p | TUBA1B    | 10376  |
| hsa-miR-28-5p | TUBB      | 203068 |
| hsa-miR-28-5p | TUBB2A    | 7280   |



|               |        |        |
|---------------|--------|--------|
| hsa-miR-28-5p | TUBB4A | 10382  |
| hsa-miR-28-5p | TUFM   | 7284   |
| hsa-miR-28-5p | TULP4  | 56995  |
| hsa-miR-28-5p | TVP23C | 201158 |
| hsa-miR-28-5p | TXLNA  | 200081 |
| hsa-miR-28-5p | UBA6   | 55236  |
| hsa-miR-28-5p | UBALD1 | 124402 |
| hsa-miR-28-5p | UBE2H  | 7328   |
| hsa-miR-28-5p | UBE2Q2 | 92912  |
| hsa-miR-28-5p | UBE2Z  | 65264  |
| hsa-miR-28-5p | UBFD1  | 56061  |
| hsa-miR-28-5p | UBR4   | 23352  |
| hsa-miR-28-5p | UMPS   | 7372   |
| hsa-miR-28-5p | UNC13A | 23025  |
| hsa-miR-28-5p | UNG    | 7374   |
| hsa-miR-28-5p | USP1   | 7398   |
| hsa-miR-28-5p | USP22  | 23326  |
| hsa-miR-28-5p | USP9X  | 8239   |
| hsa-miR-28-5p | VAT1L  | 57687  |
| hsa-miR-28-5p | VCAN   | 1462   |
| hsa-miR-28-5p | VEZF1  | 7716   |
| hsa-miR-28-5p | VKORC1 | 79001  |
| hsa-miR-28-5p | VPS37B | 79720  |
| hsa-miR-28-5p | VPS8   | 23355  |
| hsa-miR-28-5p | VTI1A  | 143187 |
| hsa-miR-28-5p | VWF    | 7450   |
| hsa-miR-28-5p | WAC    | 51322  |
| hsa-miR-28-5p | WDR6   | 11180  |
| hsa-miR-28-5p | WEE1   | 7465   |
| hsa-miR-28-5p | WNK1   | 65125  |
| hsa-miR-28-5p | WSB2   | 55884  |
| hsa-miR-28-5p | WTAP   | 9589   |
| hsa-miR-28-5p | XXYL1  | 152002 |
| hsa-miR-28-5p | YIPF6  | 286451 |
| hsa-miR-28-5p | YWHAE  | 7531   |
| hsa-miR-28-5p | YWHAH  | 7533   |
| hsa-miR-28-5p | ZBTB18 | 10472  |
| hsa-miR-28-5p | ZBTB37 | 84614  |
| hsa-miR-28-5p | ZBTB44 | 29068  |
| hsa-miR-28-5p | ZBTB47 | 92999  |

|                |          |        |
|----------------|----------|--------|
| hsa-miR-28-5p  | ZBTB7A   | 51341  |
| hsa-miR-28-5p  | ZBTB7B   | 51043  |
| hsa-miR-28-5p  | ZC3H11A  | 9877   |
| hsa-miR-28-5p  | ZCCHC3   | 85364  |
| hsa-miR-28-5p  | ZDHH18   | 84243  |
| hsa-miR-28-5p  | ZFP82    | 284406 |
| hsa-miR-28-5p  | ZFP91    | 80829  |
| hsa-miR-28-5p  | ZMAT3    | 64393  |
| hsa-miR-28-5p  | ZMYM6    | 9204   |
| hsa-miR-28-5p  | ZNF106   | 64397  |
| hsa-miR-28-5p  | ZNF14    | 7561   |
| hsa-miR-28-5p  | ZNF175   | 7728   |
| hsa-miR-28-5p  | ZNF207   | 7756   |
| hsa-miR-28-5p  | ZNF281   | 23528  |
| hsa-miR-28-5p  | ZNF444   | 55311  |
| hsa-miR-28-5p  | ZNF451   | 26036  |
| hsa-miR-28-5p  | ZNF496   | 84838  |
| hsa-miR-28-5p  | ZNF629   | 23361  |
| hsa-miR-28-5p  | ZNF655   | 79027  |
| hsa-miR-28-5p  | ZNF768   | 79724  |
| hsa-miR-28-5p  | ZSWIM1   | 90204  |
| hsa-miR-28-5p  | ZSWIM8   | 23053  |
| hsa-miR-339-3p | H2BC21   | 8349   |
| hsa-miR-339-3p | H4C2     | 8366   |
| hsa-miR-339-3p | HDAC1    | 3065   |
| hsa-miR-339-3p | TNRC6A   | 27327  |
| hsa-miR-339-3p | ACTN1    | 87     |
| hsa-miR-339-3p | ADA      | 100    |
| hsa-miR-339-3p | ADORA2A  | 135    |
| hsa-miR-339-3p | ADRB1    | 153    |
| hsa-miR-339-3p | AKIRIN1  | 79647  |
| hsa-miR-339-3p | ALG3     | 10195  |
| hsa-miR-339-3p | ANKRD40  | 91369  |
| hsa-miR-339-3p | ARHGAP17 | 55114  |
| hsa-miR-339-3p | ARID2    | 196528 |
| hsa-miR-339-3p | ARPC3    | 10094  |
| hsa-miR-339-3p | ATP5F1B  | 506    |
| hsa-miR-339-3p | BDNF     | 627    |
| hsa-miR-339-3p | BICRA    | 29998  |
| hsa-miR-339-3p | BRD4     | 23476  |
| hsa-miR-339-3p | BTG2     | 7832   |
| hsa-miR-339-3p | C1orf21  | 81563  |

|                |         |        |
|----------------|---------|--------|
| hsa-miR-339-3p | CBX2    | 84733  |
| hsa-miR-339-3p | CCKAR   | 886    |
| hsa-miR-339-3p | CCKBR   | 887    |
| hsa-miR-339-3p | CCN1    | 3491   |
| hsa-miR-339-3p | CDH23   | 64072  |
| hsa-miR-339-3p | CELF1   | 10658  |
| hsa-miR-339-3p | CELSR2  | 1952   |
| hsa-miR-339-3p | CHSY1   | 22856  |
| hsa-miR-339-3p | CKAP4   | 10970  |
| hsa-miR-339-3p | CLN6    | 54982  |
| hsa-miR-339-3p | CLPTM1  | 1209   |
| hsa-miR-339-3p | CMAS    | 55907  |
| hsa-miR-339-3p | COL1A1  | 1277   |
| hsa-miR-339-3p | COL3A1  | 1281   |
| hsa-miR-339-3p | COL4A2  | 1284   |
| hsa-miR-339-3p | CRHR2   | 1395   |
| hsa-miR-339-3p | CSNK1A1 | 1452   |
| hsa-miR-339-3p | CTNND1  | 1500   |
| hsa-miR-339-3p | CXCR4   | 7852   |
| hsa-miR-339-3p | DDB1    | 1642   |
| hsa-miR-339-3p | DDX3X   | 1654   |
| hsa-miR-339-3p | DDX6    | 1656   |
| hsa-miR-339-3p | DHRS13  | 147015 |
| hsa-miR-339-3p | DICER1  | 23405  |
| hsa-miR-339-3p | DUSP14  | 11072  |
| hsa-miR-339-3p | EEF1D   | 1936   |
| hsa-miR-339-3p | EGR1    | 1958   |
| hsa-miR-339-3p | EHD2    | 30846  |
| hsa-miR-339-3p | EIF5A2  | 56648  |
| hsa-miR-339-3p | EZR     | 7430   |
| hsa-miR-339-3p | FBN2    | 2201   |
| hsa-miR-339-3p | FJX1    | 24147  |
| hsa-miR-339-3p | FLG     | 2312   |
| hsa-miR-339-3p | FOXO1   | 2308   |
| hsa-miR-339-3p | FTSJ1   | 24140  |
| hsa-miR-339-3p | FUT11   | 170384 |
| hsa-miR-339-3p | FZD2    | 2535   |
| hsa-miR-339-3p | GABRA6  | 2559   |
| hsa-miR-339-3p | GARS1   | 2617   |
| hsa-miR-339-3p | GNB1L   | 54584  |
| hsa-miR-339-3p | H2AC11  | 8969   |
| hsa-miR-339-3p | HECTD4  | 283450 |
| hsa-miR-339-3p | HERC2   | 8924   |

|                |           |        |
|----------------|-----------|--------|
| hsa-miR-339-3p | HEYL      | 26508  |
| hsa-miR-339-3p | HNRNPA2B1 | 3181   |
| hsa-miR-339-3p | HNRNPU    | 3192   |
| hsa-miR-339-3p | HTR2C     | 3358   |
| hsa-miR-339-3p | ID3       | 3399   |
| hsa-miR-339-3p | IGF2      | 3481   |
| hsa-miR-339-3p | IGSF9B    | 22997  |
| hsa-miR-339-3p | INSIG1    | 3638   |
| hsa-miR-339-3p | IPO9      | 55705  |
| hsa-miR-339-3p | KDM3B     | 51780  |
| hsa-miR-339-3p | KLHL15    | 80311  |
| hsa-miR-339-3p | KMT2C     | 58508  |
| hsa-miR-339-3p | KMT2D     | 8085   |
| hsa-miR-339-3p | KMT5A     | 387893 |
| hsa-miR-339-3p | LIG1      | 3978   |
| hsa-miR-339-3p | LOXL2     | 4017   |
| hsa-miR-339-3p | LRRFIP1   | 9208   |
| hsa-miR-339-3p | MANBA     | 4126   |
| hsa-miR-339-3p | MAOA      | 4128   |
| hsa-miR-339-3p | MBD3      | 53615  |
| hsa-miR-339-3p | MCL1      | 4170   |
| hsa-miR-339-3p | MEX3D     | 399664 |
| hsa-miR-339-3p | MOCOS     | 55034  |
| hsa-miR-339-3p | MTA2      | 9219   |
| hsa-miR-339-3p | NA        | NA     |
| hsa-miR-339-3p | NBAS      | 51594  |
| hsa-miR-339-3p | NEDD8     | 4738   |
| hsa-miR-339-3p | NFKB1     | 4790   |
| hsa-miR-339-3p | NME4      | 4833   |
| hsa-miR-339-3p | NR3C1     | 2908   |
| hsa-miR-339-3p | NTRK3     | 4916   |
| hsa-miR-339-3p | NUFIP2    | 57532  |
| hsa-miR-339-3p | OAZ1      | 4946   |
| hsa-miR-339-3p | PABPC1    | 26986  |
| hsa-miR-339-3p | PAPPA2    | 60676  |
| hsa-miR-339-3p | PATZ1     | 23598  |
| hsa-miR-339-3p | PAWR      | 5074   |
| hsa-miR-339-3p | PELI3     | 246330 |
| hsa-miR-339-3p | PHLDA2    | 7262   |
| hsa-miR-339-3p | PITPNM3   | 83394  |
| hsa-miR-339-3p | PLOD1     | 5351   |
| hsa-miR-339-3p | POMC      | 5443   |
| hsa-miR-339-3p | POU4F1    | 5457   |

|                |          |        |
|----------------|----------|--------|
| hsa-miR-339-3p | PPFIBP2  | 8495   |
| hsa-miR-339-3p | PRPSAP1  | 5635   |
| hsa-miR-339-3p | PTPN1    | 5770   |
| hsa-miR-339-3p | PUS7     | 54517  |
| hsa-miR-339-3p | RABL6    | 55684  |
| hsa-miR-339-3p | RANGAP1  | 5905   |
| hsa-miR-339-3p | RBM23    | 55147  |
| hsa-miR-339-3p | RGS2     | 5997   |
| hsa-miR-339-3p | RLIM     | 51132  |
| hsa-miR-339-3p | RNF138   | 51444  |
| hsa-miR-339-3p | RNF169   | 254225 |
| hsa-miR-339-3p | RPL10A   | 4736   |
| hsa-miR-339-3p | RPS5     | 6193   |
| hsa-miR-339-3p | RTL10    | 79680  |
| hsa-miR-339-3p | SAMD1    | 90378  |
| hsa-miR-339-3p | SAR1A    | 56681  |
| hsa-miR-339-3p | SCD      | 6319   |
| hsa-miR-339-3p | SEC16A   | 9919   |
| hsa-miR-339-3p | SEMA7A   | 8482   |
| hsa-miR-339-3p | SHOX2    | 6474   |
| hsa-miR-339-3p | SLC16A1  | 6566   |
| hsa-miR-339-3p | SLC20A1  | 6574   |
| hsa-miR-339-3p | SLC39A14 | 23516  |
| hsa-miR-339-3p | SLC6A2   | 6530   |
| hsa-miR-339-3p | SLC9A1   | 6548   |
| hsa-miR-339-3p | SLFN5    | 162394 |
| hsa-miR-339-3p | SP2      | 6668   |
| hsa-miR-339-3p | SRM      | 6723   |
| hsa-miR-339-3p | STIP1    | 10963  |
| hsa-miR-339-3p | SYNCRIP  | 10492  |
| hsa-miR-339-3p | SYNE2    | 23224  |
| hsa-miR-339-3p | SYT9     | 143425 |
| hsa-miR-339-3p | TAOK2    | 9344   |
| hsa-miR-339-3p | TBCD     | 6904   |
| hsa-miR-339-3p | TBCEL    | 219899 |
| hsa-miR-339-3p | TEAD1    | 7003   |
| hsa-miR-339-3p | TET2     | 54790  |
| hsa-miR-339-3p | THOC5    | 8563   |
| hsa-miR-339-3p | TLN1     | 7094   |
| hsa-miR-339-3p | TMEM121  | 80757  |
| hsa-miR-339-3p | TMEM250  | 90120  |
| hsa-miR-339-3p | TRA2B    | 6434   |
| hsa-miR-339-3p | TUB      | 7275   |

|                |          |        |
|----------------|----------|--------|
| hsa-miR-339-3p | TUBB     | 203068 |
| hsa-miR-339-3p | TUBB6    | 84617  |
| hsa-miR-339-3p | TXNRD1   | 7296   |
| hsa-miR-339-3p | UBE2G1   | 7326   |
| hsa-miR-339-3p | UNC45B   | 146862 |
| hsa-miR-339-3p | UQCC2    | 84300  |
| hsa-miR-339-3p | USP25    | 29761  |
| hsa-miR-339-3p | UVSSA    | 57654  |
| hsa-miR-339-3p | VCL      | 7414   |
| hsa-miR-339-3p | WDR6     | 11180  |
| hsa-miR-339-3p | WDTC1    | 23038  |
| hsa-miR-339-3p | XAB2     | 56949  |
| hsa-miR-339-3p | YAP1     | 10413  |
| hsa-miR-339-3p | YWHAE    | 7531   |
| hsa-miR-339-3p | ZBTB10   | 65986  |
| hsa-miR-339-3p | ZCCHC3   | 85364  |
| hsa-miR-339-3p | ZFP36    | 7538   |
| hsa-miR-339-3p | ZFP91    | 80829  |
| hsa-miR-339-3p | ZNF317   | 57693  |
| hsa-miR-339-3p | ZNF718   | 255403 |
| hsa-miR-432-5p | AKT3     | 10000  |
| hsa-miR-432-5p | CALM2    | 805    |
| hsa-miR-432-5p | CREB1    | 1385   |
| hsa-miR-432-5p | ERBB4    | 2066   |
| hsa-miR-432-5p | GNG2     | 54331  |
| hsa-miR-432-5p | H2BC4    | 8347   |
| hsa-miR-432-5p | H2BC5    | 3017   |
| hsa-miR-432-5p | IGF1R    | 3480   |
| hsa-miR-432-5p | MMP2     | 4313   |
| hsa-miR-432-5p | NCOA1    | 8648   |
| hsa-miR-432-5p | NRIP1    | 8204   |
| hsa-miR-432-5p | POLR2A   | 5430   |
| hsa-miR-432-5p | PPP5C    | 5536   |
| hsa-miR-432-5p | SHC1     | 6464   |
| hsa-miR-432-5p | ZNF217   | 7764   |
| hsa-miR-432-5p | ABCC5    | 10057  |
| hsa-miR-432-5p | ACTN4    | 81     |
| hsa-miR-432-5p | ADAMTS17 | 170691 |
| hsa-miR-432-5p | ADAR     | 103    |
| hsa-miR-432-5p | ADGRL2   | 23266  |
| hsa-miR-432-5p | AHNAK    | 79026  |
| hsa-miR-432-5p | AKAP12   | 9590   |
| hsa-miR-432-5p | AKAP2    | 11217  |

|                |            |        |
|----------------|------------|--------|
| hsa-miR-432-5p | AL096711.2 | NA     |
| hsa-miR-432-5p | ANKRD11    | 29123  |
| hsa-miR-432-5p | ANKRD13C   | 81573  |
| hsa-miR-432-5p | ANKRD17    | 26057  |
| hsa-miR-432-5p | ANLN       | 54443  |
| hsa-miR-432-5p | ANO5       | 203859 |
| hsa-miR-432-5p | AP1S1      | 1174   |
| hsa-miR-432-5p | AP2A2      | 161    |
| hsa-miR-432-5p | AP2B1      | 163    |
| hsa-miR-432-5p | APC        | 324    |
| hsa-miR-432-5p | APLP1      | 333    |
| hsa-miR-432-5p | ARHGAP32   | 9743   |
| hsa-miR-432-5p | ARHGEF4    | 50649  |
| hsa-miR-432-5p | ARID1A     | 8289   |
| hsa-miR-432-5p | ARID1B     | 57492  |
| hsa-miR-432-5p | ARID4B     | 51742  |
| hsa-miR-432-5p | ARID5B     | 84159  |
| hsa-miR-432-5p | ASAP1      | 50807  |
| hsa-miR-432-5p | ASH1L      | 55870  |
| hsa-miR-432-5p | ATL1       | 51062  |
| hsa-miR-432-5p | ATM        | 472    |
| hsa-miR-432-5p | ATP2A2     | 488    |
| hsa-miR-432-5p | AXL        | 558    |
| hsa-miR-432-5p | AZIN1      | 51582  |
| hsa-miR-432-5p | BBS4       | 585    |
| hsa-miR-432-5p | BBX        | 56987  |
| hsa-miR-432-5p | BDKRB2     | 624    |
| hsa-miR-432-5p | BDP1       | 55814  |
| hsa-miR-432-5p | BHLHE40    | 8553   |
| hsa-miR-432-5p | BLCAP      | 10904  |
| hsa-miR-432-5p | BTG1       | 694    |
| hsa-miR-432-5p | BTG2       | 7832   |
| hsa-miR-432-5p | C10orf105  | 414152 |
| hsa-miR-432-5p | C16orf72   | 29035  |
| hsa-miR-432-5p | C1orf198   | 84886  |
| hsa-miR-432-5p | CACNA2D1   | 781    |
| hsa-miR-432-5p | CASKIN1    | 57524  |
| hsa-miR-432-5p | CAVIN1     | 284119 |
| hsa-miR-432-5p | CAVIN2     | 8436   |
| hsa-miR-432-5p | CBX3       | 11335  |
| hsa-miR-432-5p | CCDC47     | 57003  |
| hsa-miR-432-5p | CCDC88A    | 55704  |
| hsa-miR-432-5p | CCN1       | 3491   |

|                |         |        |
|----------------|---------|--------|
| hsa-miR-432-5p | CCNI    | 10983  |
| hsa-miR-432-5p | CCP110  | 9738   |
| hsa-miR-432-5p | CCSER2  | 54462  |
| hsa-miR-432-5p | CDC14B  | 8555   |
| hsa-miR-432-5p | CDC73   | 79577  |
| hsa-miR-432-5p | CDCA7L  | 55536  |
| hsa-miR-432-5p | CDH10   | 1008   |
| hsa-miR-432-5p | CDH13   | 1012   |
| hsa-miR-432-5p | CDH2    | 1000   |
| hsa-miR-432-5p | CDK5R1  | 8851   |
| hsa-miR-432-5p | CDR2    | 1039   |
| hsa-miR-432-5p | CEMIP   | 57214  |
| hsa-miR-432-5p | CENPA   | 1058   |
| hsa-miR-432-5p | CENPC   | 1060   |
| hsa-miR-432-5p | CETP    | 1071   |
| hsa-miR-432-5p | CHAC1   | 79094  |
| hsa-miR-432-5p | CHGB    | 1114   |
| hsa-miR-432-5p | CHMP1B  | 57132  |
| hsa-miR-432-5p | CHMP3   | 51652  |
| hsa-miR-432-5p | CLIP2   | 7461   |
| hsa-miR-432-5p | CLUH    | 23277  |
| hsa-miR-432-5p | CNOT2   | 4848   |
| hsa-miR-432-5p | CNST    | 163882 |
| hsa-miR-432-5p | CNTNAP1 | 8506   |
| hsa-miR-432-5p | COL12A1 | 1303   |
| hsa-miR-432-5p | COL1A2  | 1278   |
| hsa-miR-432-5p | COL5A1  | 1289   |
| hsa-miR-432-5p | COL6A1  | 1291   |
| hsa-miR-432-5p | COL6A3  | 1293   |
| hsa-miR-432-5p | CPD     | 1362   |
| hsa-miR-432-5p | CPEB2   | 132864 |
| hsa-miR-432-5p | CPEB4   | 80315  |
| hsa-miR-432-5p | CPSF3   | 51692  |
| hsa-miR-432-5p | CPT1A   | 1374   |
| hsa-miR-432-5p | CREBZF  | 58487  |
| hsa-miR-432-5p | CSDE1   | 7812   |
| hsa-miR-432-5p | CSNK1G2 | 1455   |
| hsa-miR-432-5p | CTDSP2  | 10106  |
| hsa-miR-432-5p | CTNNA1  | 1495   |
| hsa-miR-432-5p | DCTN2   | 10540  |
| hsa-miR-432-5p | DENND6A | 201627 |
| hsa-miR-432-5p | DHX16   | 8449   |
| hsa-miR-432-5p | DIDO1   | 11083  |



|                |          |        |
|----------------|----------|--------|
| hsa-miR-432-5p | DIPK1A   | 388650 |
| hsa-miR-432-5p | DIPK2A   | 205428 |
| hsa-miR-432-5p | DLC1     | 10395  |
| hsa-miR-432-5p | DLG5     | 9231   |
| hsa-miR-432-5p | DNAJB4   | 11080  |
| hsa-miR-432-5p | DNAJB6   | 10049  |
| hsa-miR-432-5p | DNAJC6   | 9829   |
| hsa-miR-432-5p | DNER     | 92737  |
| hsa-miR-432-5p | DNM1L    | 10059  |
| hsa-miR-432-5p | DNTTIP2  | 30836  |
| hsa-miR-432-5p | DPM2     | 8818   |
| hsa-miR-432-5p | DR1      | 1810   |
| hsa-miR-432-5p | DSEL     | 92126  |
| hsa-miR-432-5p | DST      | 667    |
| hsa-miR-432-5p | DSTYK    | 25778  |
| hsa-miR-432-5p | DUSP16   | 80824  |
| hsa-miR-432-5p | DYNC1H1  | 1778   |
| hsa-miR-432-5p | ECHDC1   | 55862  |
| hsa-miR-432-5p | EDEM3    | 80267  |
| hsa-miR-432-5p | EDIL3    | 10085  |
| hsa-miR-432-5p | EFHD2    | 79180  |
| hsa-miR-432-5p | EIF4A1   | 1973   |
| hsa-miR-432-5p | EIF4G3   | 8672   |
| hsa-miR-432-5p | ENAH     | 55740  |
| hsa-miR-432-5p | ENC1     | 8507   |
| hsa-miR-432-5p | EPAS1    | 2034   |
| hsa-miR-432-5p | ERO1B    | 56605  |
| hsa-miR-432-5p | ESPL1    | 9700   |
| hsa-miR-432-5p | ETNK1    | 55500  |
| hsa-miR-432-5p | EWSR1    | 2130   |
| hsa-miR-432-5p | EXOSC10  | 5394   |
| hsa-miR-432-5p | FAM160B1 | 57700  |
| hsa-miR-432-5p | FAM171A1 | 221061 |
| hsa-miR-432-5p | FAM171B  | 165215 |
| hsa-miR-432-5p | FAR1     | 84188  |
| hsa-miR-432-5p | FBN1     | 2200   |
| hsa-miR-432-5p | FBXL3    | 26224  |
| hsa-miR-432-5p | FLNA     | 2316   |
| hsa-miR-432-5p | FMN1     | 342184 |
| hsa-miR-432-5p | FN1      | 2335   |
| hsa-miR-432-5p | FNDC3A   | 22862  |
| hsa-miR-432-5p | FNDC3B   | 64778  |
| hsa-miR-432-5p | FRS2     | 10818  |

|                |           |        |
|----------------|-----------|--------|
| hsa-miR-432-5p | FSCN1     | 6624   |
| hsa-miR-432-5p | FSTL1     | 11167  |
| hsa-miR-432-5p | FUT8      | 2530   |
| hsa-miR-432-5p | FZR1      | 51343  |
| hsa-miR-432-5p | G3BP1     | 10146  |
| hsa-miR-432-5p | GABARAPL2 | 11345  |
| hsa-miR-432-5p | GABRB2    | 2561   |
| hsa-miR-432-5p | GABRB3    | 2562   |
| hsa-miR-432-5p | GALNT2    | 2590   |
| hsa-miR-432-5p | GAPVD1    | 26130  |
| hsa-miR-432-5p | GAS1      | 2619   |
| hsa-miR-432-5p | GDA       | 9615   |
| hsa-miR-432-5p | GDF5OS    | 554250 |
| hsa-miR-432-5p | GFPT1     | 2673   |
| hsa-miR-432-5p | GGT5      | 2687   |
| hsa-miR-432-5p | GJD2      | 57369  |
| hsa-miR-432-5p | GMFB      | 2764   |
| hsa-miR-432-5p | GNA12     | 2768   |
| hsa-miR-432-5p | GNAS      | 2778   |
| hsa-miR-432-5p | GOLGA7    | 51125  |
| hsa-miR-432-5p | GOLIM4    | 27333  |
| hsa-miR-432-5p | GRIA2     | 2891   |
| hsa-miR-432-5p | GRIN2A    | 2903   |
| hsa-miR-432-5p | GRIPAP1   | 56850  |
| hsa-miR-432-5p | GSKIP     | 51527  |
| hsa-miR-432-5p | GUCY1B1   | 2983   |
| hsa-miR-432-5p | H1-0      | 3005   |
| hsa-miR-432-5p | HEATR5A   | 25938  |
| hsa-miR-432-5p | HIPK2     | 28996  |
| hsa-miR-432-5p | HMGB2     | 3148   |
| hsa-miR-432-5p | HOOK3     | 84376  |
| hsa-miR-432-5p | HSD17B4   | 3295   |
| hsa-miR-432-5p | HSP90B1   | 7184   |
| hsa-miR-432-5p | HSPA8     | 3312   |
| hsa-miR-432-5p | HUWE1     | 10075  |
| hsa-miR-432-5p | HYOU1     | 10525  |
| hsa-miR-432-5p | IAPP      | 3375   |
| hsa-miR-432-5p | ID2       | 3398   |
| hsa-miR-432-5p | ID4       | 3400   |
| hsa-miR-432-5p | IDH3A     | 3419   |
| hsa-miR-432-5p | IGSF8     | 93185  |
| hsa-miR-432-5p | IL6ST     | 3572   |
| hsa-miR-432-5p | IMPDH2    | 3615   |

|                |           |        |
|----------------|-----------|--------|
| hsa-miR-432-5p | ING5      | 84289  |
| hsa-miR-432-5p | INS       | 3630   |
| hsa-miR-432-5p | IPO7      | 10527  |
| hsa-miR-432-5p | IRF2BP2   | 359948 |
| hsa-miR-432-5p | ITGA11    | 22801  |
| hsa-miR-432-5p | ITGB8     | 3696   |
| hsa-miR-432-5p | ITM2C     | 81618  |
| hsa-miR-432-5p | ITPRIPL1  | 150771 |
| hsa-miR-432-5p | ITSN1     | 6453   |
| hsa-miR-432-5p | JAK1      | 3716   |
| hsa-miR-432-5p | KARS1     | 3735   |
| hsa-miR-432-5p | KCNB1     | 3745   |
| hsa-miR-432-5p | KCNC2     | 3747   |
| hsa-miR-432-5p | KCNK16    | 83795  |
| hsa-miR-432-5p | KCNMA1    | 3778   |
| hsa-miR-432-5p | KCNMB1    | 3779   |
| hsa-miR-432-5p | KCTD10    | 83892  |
| hsa-miR-432-5p | KCTD3     | 51133  |
| hsa-miR-432-5p | KDM2B     | 84678  |
| hsa-miR-432-5p | KDM4C     | 23081  |
| hsa-miR-432-5p | KIAA0319L | 79932  |
| hsa-miR-432-5p | KIAA1671  | 85379  |
| hsa-miR-432-5p | KIF21A    | 55605  |
| hsa-miR-432-5p | KIF3B     | 9371   |
| hsa-miR-432-5p | KLHL28    | 54813  |
| hsa-miR-432-5p | KTN1      | 3895   |
| hsa-miR-432-5p | LANCL1    | 10314  |
| hsa-miR-432-5p | LARP1     | 23367  |
| hsa-miR-432-5p | LASP1     | 3927   |
| hsa-miR-432-5p | LGI3      | 203190 |
| hsa-miR-432-5p | LIF       | 3976   |
| hsa-miR-432-5p | LOX       | 4015   |
| hsa-miR-432-5p | LRBA      | 987    |
| hsa-miR-432-5p | LRP11     | 84918  |
| hsa-miR-432-5p | LRPPRC    | 10128  |
| hsa-miR-432-5p | LRRC1     | 55227  |
| hsa-miR-432-5p | LSAMP     | 4045   |
| hsa-miR-432-5p | LTBP1     | 4052   |
| hsa-miR-432-5p | LYRM7     | 90624  |
| hsa-miR-432-5p | M6PR      | 4074   |
| hsa-miR-432-5p | MAN1A2    | 10905  |
| hsa-miR-432-5p | MAP1A     | 4130   |
| hsa-miR-432-5p | MAP1B     | 4131   |

|                |           |           |
|----------------|-----------|-----------|
| hsa-miR-432-5p | MAP2      | 4133      |
| hsa-miR-432-5p | MAP4      | 4134      |
| hsa-miR-432-5p | MAPK8IP3  | 23162     |
| hsa-miR-432-5p | MAPRE1    | 22919     |
| hsa-miR-432-5p | MARCHF6   | 10299     |
| hsa-miR-432-5p | MARCKS    | 4082      |
| hsa-miR-432-5p | MATN3     | 4148      |
| hsa-miR-432-5p | MBNL2     | 10150     |
| hsa-miR-432-5p | MDH1      | 4190      |
| hsa-miR-432-5p | MDM2      | 4193      |
| hsa-miR-432-5p | MECP2     | 4204      |
| hsa-miR-432-5p | MEDAG     | 84935     |
| hsa-miR-432-5p | MEGF9     | 1955      |
| hsa-miR-432-5p | MGAT1     | 4245      |
| hsa-miR-432-5p | MICU1     | 10367     |
| hsa-miR-432-5p | MICU3     | 286097    |
| hsa-miR-432-5p | MLLT6     | 4302      |
| hsa-miR-432-5p | MME       | 4311      |
| hsa-miR-432-5p | MOGAT1    | 116255    |
| hsa-miR-432-5p | MRC2      | 9902      |
| hsa-miR-432-5p | MROH7     | 374977    |
| hsa-miR-432-5p | MRPL34    | 64981     |
| hsa-miR-432-5p | MSN       | 4478      |
| hsa-miR-432-5p | MTMR10    | 54893     |
| hsa-miR-432-5p | MTPN      | 136319    |
| hsa-miR-432-5p | MTRNR2L10 | 100463488 |
| hsa-miR-432-5p | MTRNR2L12 | 100462981 |
| hsa-miR-432-5p | MYH9      | 4627      |
| hsa-miR-432-5p | MYO1B     | 4430      |
| hsa-miR-432-5p | NA        | NA        |
| hsa-miR-432-5p | NAP1L5    | 266812    |
| hsa-miR-432-5p | NAPB      | 63908     |
| hsa-miR-432-5p | NBAS      | 51594     |
| hsa-miR-432-5p | NCAPD3    | 23310     |
| hsa-miR-432-5p | NECAB1    | 64168     |
| hsa-miR-432-5p | NES       | 10763     |
| hsa-miR-432-5p | NET1      | 10276     |
| hsa-miR-432-5p | NF1       | 4763      |
| hsa-miR-432-5p | NFE2L1    | 4779      |
| hsa-miR-432-5p | NFIC      | 4782      |
| hsa-miR-432-5p | NMRAL1    | 57407     |
| hsa-miR-432-5p | NNMT      | 4837      |
| hsa-miR-432-5p | NPTX2     | 4885      |

|                |            |        |
|----------------|------------|--------|
| hsa-miR-432-5p | NR1D1      | 9572   |
| hsa-miR-432-5p | NR2F2      | 7026   |
| hsa-miR-432-5p | NRG3       | 10718  |
| hsa-miR-432-5p | NUCB2      | 4925   |
| hsa-miR-432-5p | NUP62      | 23636  |
| hsa-miR-432-5p | OGT        | 8473   |
| hsa-miR-432-5p | OLIG1      | 116448 |
| hsa-miR-432-5p | OLIG2      | 10215  |
| hsa-miR-432-5p | OPCML      | 4978   |
| hsa-miR-432-5p | OR2C3      | 81472  |
| hsa-miR-432-5p | OR6A2      | 8590   |
| hsa-miR-432-5p | OSBPL10    | 114884 |
| hsa-miR-432-5p | OTUD4      | 54726  |
| hsa-miR-432-5p | P3H1       | 64175  |
| hsa-miR-432-5p | P4HB       | 5034   |
| hsa-miR-432-5p | PALLD      | 23022  |
| hsa-miR-432-5p | PALM2AKAP2 | 445815 |
| hsa-miR-432-5p | PBRM1      | 55193  |
| hsa-miR-432-5p | PBXIP1     | 57326  |
| hsa-miR-432-5p | PCDH11X    | 27328  |
| hsa-miR-432-5p | PCDH9      | 5101   |
| hsa-miR-432-5p | PCLO       | 27445  |
| hsa-miR-432-5p | PCSK2      | 5126   |
| hsa-miR-432-5p | PDCD7      | 10081  |
| hsa-miR-432-5p | PDCL       | 5082   |
| hsa-miR-432-5p | PDE4DIP    | 9659   |
| hsa-miR-432-5p | PDIA4      | 9601   |
| hsa-miR-432-5p | PDS5B      | 23047  |
| hsa-miR-432-5p | PEG10      | 23089  |
| hsa-miR-432-5p | PFKFB2     | 5208   |
| hsa-miR-432-5p | PFKFB3     | 5209   |
| hsa-miR-432-5p | PFN1       | 5216   |
| hsa-miR-432-5p | PGK1       | 5230   |
| hsa-miR-432-5p | PGRMC2     | 10424  |
| hsa-miR-432-5p | PHF13      | 148479 |
| hsa-miR-432-5p | PHLDB2     | 90102  |
| hsa-miR-432-5p | PIGT       | 51604  |
| hsa-miR-432-5p | PIK3CB     | 5291   |
| hsa-miR-432-5p | PITPNM1    | 9600   |
| hsa-miR-432-5p | PLA2G12A   | 81579  |
| hsa-miR-432-5p | PLAT       | 5327   |
| hsa-miR-432-5p | PLEC       | 5339   |
| hsa-miR-432-5p | PNISR      | 25957  |

|                |              |           |
|----------------|--------------|-----------|
| hsa-miR-432-5p | PNMA8A       | 55228     |
| hsa-miR-432-5p | PNPLA2       | 57104     |
| hsa-miR-432-5p | PNPLA8       | 50640     |
| hsa-miR-432-5p | POLA1        | 5422      |
| hsa-miR-432-5p | PON2         | 5445      |
| hsa-miR-432-5p | PPDPF        | 79144     |
| hsa-miR-432-5p | PRKAB1       | 5564      |
| hsa-miR-432-5p | PRKCH        | 5583      |
| hsa-miR-432-5p | PRKX         | 5613      |
| hsa-miR-432-5p | PRR5-ARHGAP8 | 553158    |
| hsa-miR-432-5p | PRRC2B       | 84726     |
| hsa-miR-432-5p | PSAP         | 5660      |
| hsa-miR-432-5p | PSD3         | 23362     |
| hsa-miR-432-5p | PTBP2        | 58155     |
| hsa-miR-432-5p | PTBP3        | 9991      |
| hsa-miR-432-5p | PTHLH        | 5744      |
| hsa-miR-432-5p | PTPN3        | 5774      |
| hsa-miR-432-5p | RAB11A       | 8766      |
| hsa-miR-432-5p | RAB2A        | 5862      |
| hsa-miR-432-5p | RAB3GAP1     | 22930     |
| hsa-miR-432-5p | RAD50        | 10111     |
| hsa-miR-432-5p | RAF1         | 5894      |
| hsa-miR-432-5p | RAPH1        | 65059     |
| hsa-miR-432-5p | RASA1        | 5921      |
| hsa-miR-432-5p | RBFOX1       | 54715     |
| hsa-miR-432-5p | RBFOX2       | 23543     |
| hsa-miR-432-5p | RBM26        | 64062     |
| hsa-miR-432-5p | RCOR1        | 23186     |
| hsa-miR-432-5p | RESF1        | 55196     |
| hsa-miR-432-5p | RFK          | 55312     |
| hsa-miR-432-5p | RGS7BP       | 401190    |
| hsa-miR-432-5p | RHOB         | 388       |
| hsa-miR-432-5p | RHOBTB2      | 23221     |
| hsa-miR-432-5p | RHOBTB3      | 22836     |
| hsa-miR-432-5p | RNF103-CHMP3 | 100526767 |
| hsa-miR-432-5p | RNF141       | 50862     |
| hsa-miR-432-5p | RNF213       | 57674     |
| hsa-miR-432-5p | RPLP0        | 6175      |
| hsa-miR-432-5p | RTN3         | 10313     |
| hsa-miR-432-5p | SACS         | 26278     |
| hsa-miR-432-5p | SAE1         | 10055     |
| hsa-miR-432-5p | SATB1        | 6304      |
| hsa-miR-432-5p | SBDS         | 51119     |

|                |          |        |
|----------------|----------|--------|
| hsa-miR-432-5p | SCD      | 6319   |
| hsa-miR-432-5p | SCG2     | 7857   |
| hsa-miR-432-5p | SDE2     | 163859 |
| hsa-miR-432-5p | SEC14L4  | 284904 |
| hsa-miR-432-5p | SEC24B   | 10427  |
| hsa-miR-432-5p | SEPTIN2  | 4735   |
| hsa-miR-432-5p | SERP1    | 27230  |
| hsa-miR-432-5p | SERPINE2 | 5270   |
| hsa-miR-432-5p | SERPINH1 | 871    |
| hsa-miR-432-5p | SESN3    | 143686 |
| hsa-miR-432-5p | SETBP1   | 26040  |
| hsa-miR-432-5p | SETX     | 23064  |
| hsa-miR-432-5p | SH3PXD2B | 285590 |
| hsa-miR-432-5p | SIN3B    | 23309  |
| hsa-miR-432-5p | SIPA1L2  | 57568  |
| hsa-miR-432-5p | SLBP     | 7884   |
| hsa-miR-432-5p | SLC1A1   | 6505   |
| hsa-miR-432-5p | SLC1A2   | 6506   |
| hsa-miR-432-5p | SLC24A2  | 25769  |
| hsa-miR-432-5p | SLC2A13  | 114134 |
| hsa-miR-432-5p | SLC4A4   | 8671   |
| hsa-miR-432-5p | SLC8A1   | 6546   |
| hsa-miR-432-5p | SLC9A6   | 10479  |
| hsa-miR-432-5p | SLITRK5  | 26050  |
| hsa-miR-432-5p | SMARCA5  | 8467   |
| hsa-miR-432-5p | SMU1     | 55234  |
| hsa-miR-432-5p | SNRNP200 | 23020  |
| hsa-miR-432-5p | SNRPD2   | 6633   |
| hsa-miR-432-5p | SNU13    | 4809   |
| hsa-miR-432-5p | SOBP     | 55084  |
| hsa-miR-432-5p | SOCS5    | 9655   |
| hsa-miR-432-5p | SOCS7    | 30837  |
| hsa-miR-432-5p | SOD2     | 6648   |
| hsa-miR-432-5p | SORCS1   | 114815 |
| hsa-miR-432-5p | SORT1    | 6272   |
| hsa-miR-432-5p | SOX9     | 6662   |
| hsa-miR-432-5p | SP3      | 6670   |
| hsa-miR-432-5p | SPANXN1  | 494118 |
| hsa-miR-432-5p | SPANXN5  | 494197 |
| hsa-miR-432-5p | SPARC    | 6678   |
| hsa-miR-432-5p | SPCS3    | 60559  |
| hsa-miR-432-5p | SPTBN1   | 6711   |
| hsa-miR-432-5p | SRRM2    | 23524  |

|                |         |        |
|----------------|---------|--------|
| hsa-miR-432-5p | STAMPB  | 10617  |
| hsa-miR-432-5p | STC1    | 6781   |
| hsa-miR-432-5p | STEAP2  | 261729 |
| hsa-miR-432-5p | STIP1   | 10963  |
| hsa-miR-432-5p | STK10   | 6793   |
| hsa-miR-432-5p | STRIP1  | 85369  |
| hsa-miR-432-5p | SUB1    | 10923  |
| hsa-miR-432-5p | SUMO3   | 6612   |
| hsa-miR-432-5p | SURF4   | 6836   |
| hsa-miR-432-5p | SYN3    | 8224   |
| hsa-miR-432-5p | SYNCRIP | 10492  |
| hsa-miR-432-5p | SYT4    | 6860   |
| hsa-miR-432-5p | TAF9B   | 51616  |
| hsa-miR-432-5p | TAGLN   | 6876   |
| hsa-miR-432-5p | TAOK1   | 57551  |
| hsa-miR-432-5p | TFPI    | 7035   |
| hsa-miR-432-5p | TFRC    | 7037   |
| hsa-miR-432-5p | THAP4   | 51078  |
| hsa-miR-432-5p | THBS2   | 7058   |
| hsa-miR-432-5p | TIMP3   | 7078   |
| hsa-miR-432-5p | TLN1    | 7094   |
| hsa-miR-432-5p | TMEFF1  | 8577   |
| hsa-miR-432-5p | TMPRSS2 | 7113   |
| hsa-miR-432-5p | TMTC1   | 83857  |
| hsa-miR-432-5p | TMX4    | 56255  |
| hsa-miR-432-5p | TNFAIP1 | 7126   |
| hsa-miR-432-5p | TPP2    | 7174   |
| hsa-miR-432-5p | TRAPPC2 | 6399   |
| hsa-miR-432-5p | TSC22D1 | 8848   |
| hsa-miR-432-5p | TSC22D2 | 9819   |
| hsa-miR-432-5p | TUBB    | 203068 |
| hsa-miR-432-5p | TUBB2A  | 7280   |
| hsa-miR-432-5p | UBAP1   | 51271  |
| hsa-miR-432-5p | UBE3A   | 7337   |
| hsa-miR-432-5p | UBL3    | 5412   |
| hsa-miR-432-5p | UBR5    | 51366  |
| hsa-miR-432-5p | UBTF    | 7343   |
| hsa-miR-432-5p | UGP2    | 7360   |
| hsa-miR-432-5p | UGT8    | 7368   |
| hsa-miR-432-5p | UNC13A  | 23025  |
| hsa-miR-432-5p | UNC5B   | 219699 |
| hsa-miR-432-5p | UNC79   | 57578  |
| hsa-miR-432-5p | USP53   | 54532  |



|                |          |           |
|----------------|----------|-----------|
| hsa-miR-432-5p | USP9Y    | 8287      |
| hsa-miR-432-5p | VCL      | 7414      |
| hsa-miR-432-5p | VGLL3    | 389136    |
| hsa-miR-432-5p | VPS13D   | 55187     |
| hsa-miR-432-5p | VPS26A   | 9559      |
| hsa-miR-432-5p | VPS29    | 51699     |
| hsa-miR-432-5p | VPS72    | 6944      |
| hsa-miR-432-5p | WARS2    | 10352     |
| hsa-miR-432-5p | WDFY3    | 23001     |
| hsa-miR-432-5p | WSB1     | 26118     |
| hsa-miR-432-5p | XRCC6    | 2547      |
| hsa-miR-432-5p | YARS1    | 8565      |
| hsa-miR-432-5p | YTHDC1   | 91746     |
| hsa-miR-432-5p | ZBTB20   | 26137     |
| hsa-miR-432-5p | ZBTB38   | 253461    |
| hsa-miR-432-5p | ZC3H3    | 23144     |
| hsa-miR-432-5p | ZC3H6    | 376940    |
| hsa-miR-432-5p | ZC3H7A   | 29066     |
| hsa-miR-432-5p | ZCCHC14  | 23174     |
| hsa-miR-432-5p | ZEB1     | 6935      |
| hsa-miR-432-5p | ZFC3H1   | 196441    |
| hsa-miR-432-5p | ZFP91    | 80829     |
| hsa-miR-432-5p | ZFX      | 7543      |
| hsa-miR-432-5p | ZFYVE26  | 23503     |
| hsa-miR-432-5p | ZMAT1    | 84460     |
| hsa-miR-432-5p | ZMPSTE24 | 10269     |
| hsa-miR-432-5p | ZNF281   | 23528     |
| hsa-miR-432-5p | ZNF33A   | 7581      |
| hsa-miR-432-5p | ZNF518A  | 9849      |
| hsa-miR-432-5p | ZNF605   | 100289635 |
| hsa-miR-432-5p | ZNF638   | 27332     |
| hsa-miR-432-5p | ZNF644   | 84146     |
| hsa-miR-432-5p | ZNF652   | 22834     |
| hsa-miR-432-5p | ZNF784   | 147808    |
